# Supplementary material for: 3-Thio-3,4,5-trisubstituted-1,2,4-triazoles: high affinity somatostatin receptor-4 agonist synthesis and structure–activity relationships
Source: Royal Society of Chemistry journal article supplement (doi:10.1039/d4md00597j), 2024-11-07
Supplement: d4md00597j1.pdf [file d4md00597j1.pdf]

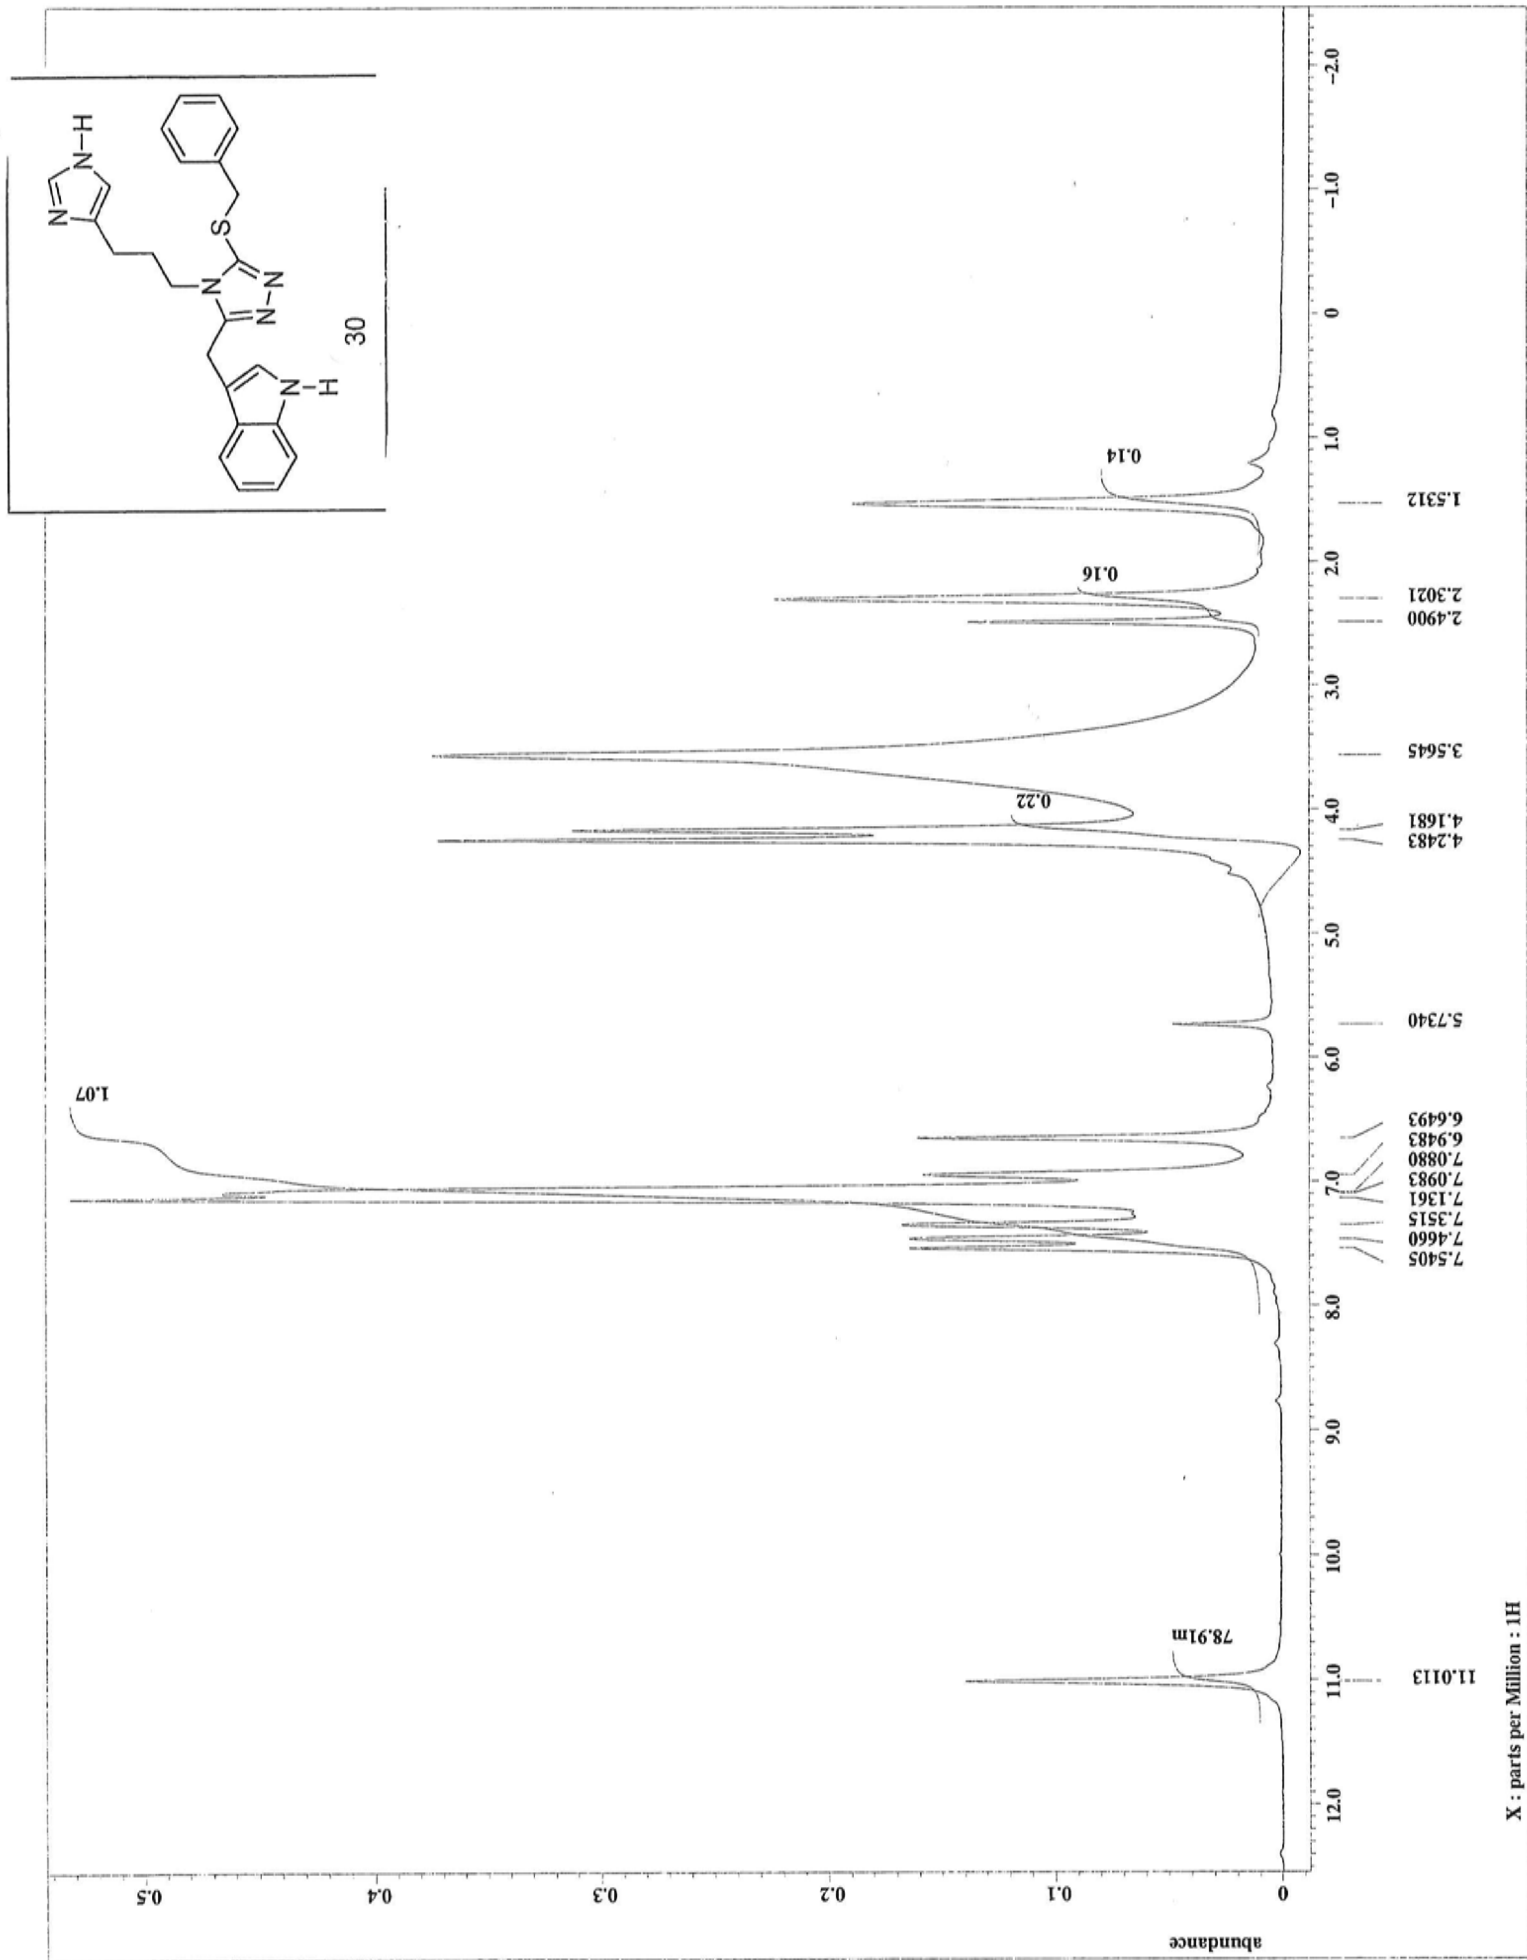

X : parts per Million : 1H

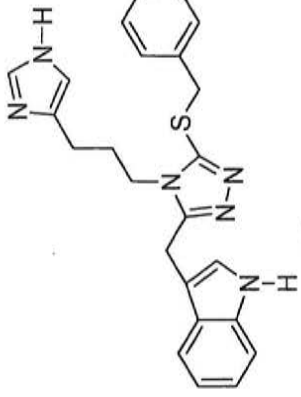

30

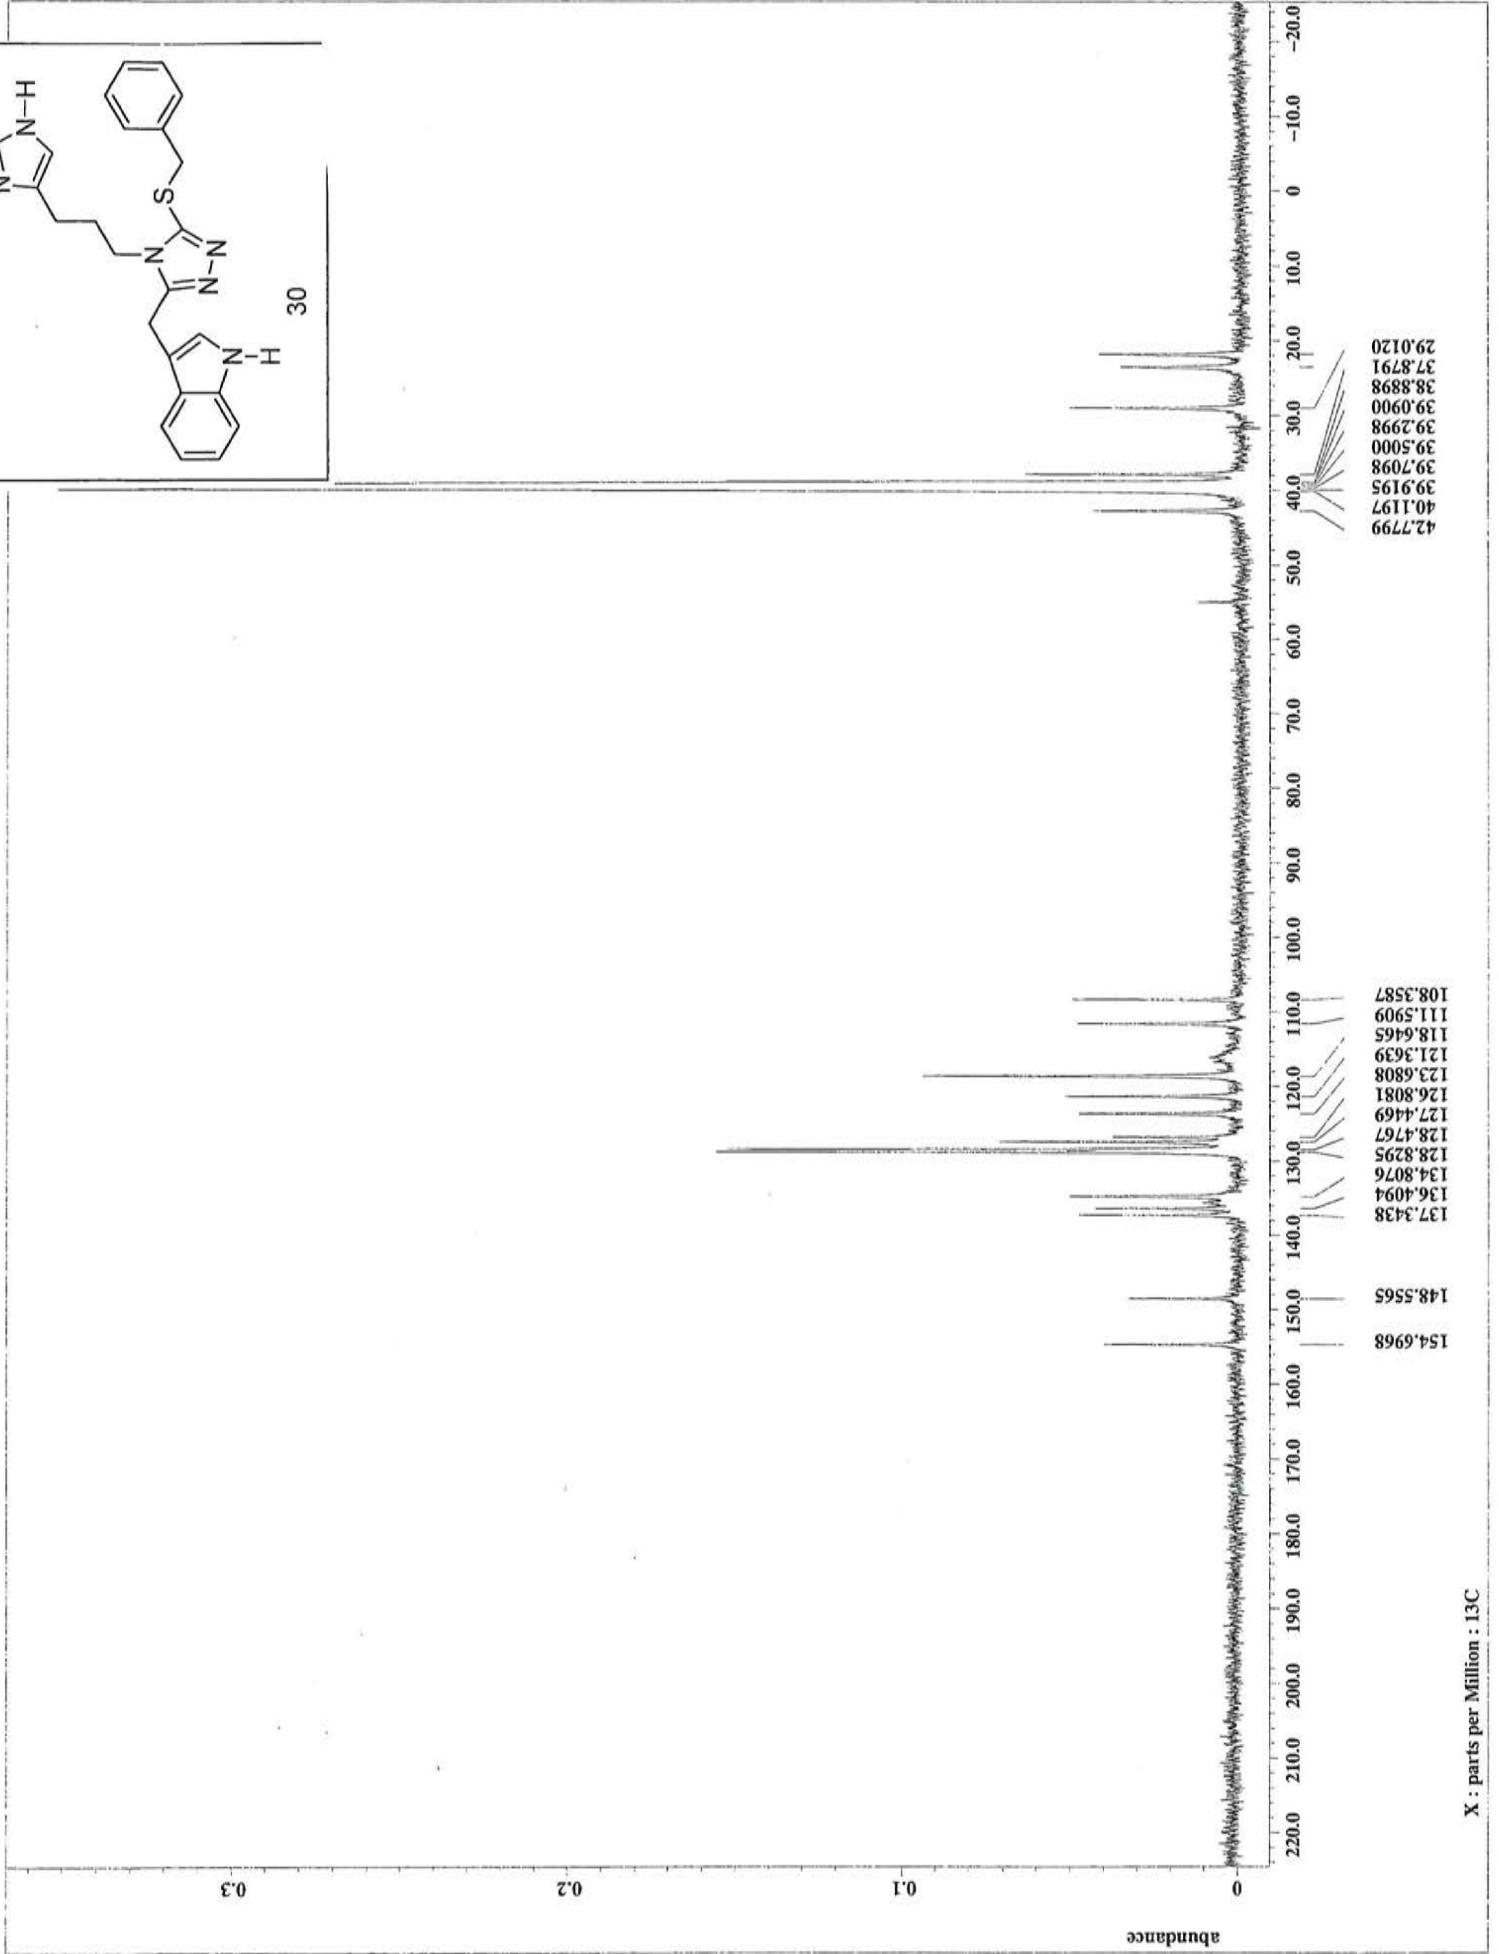

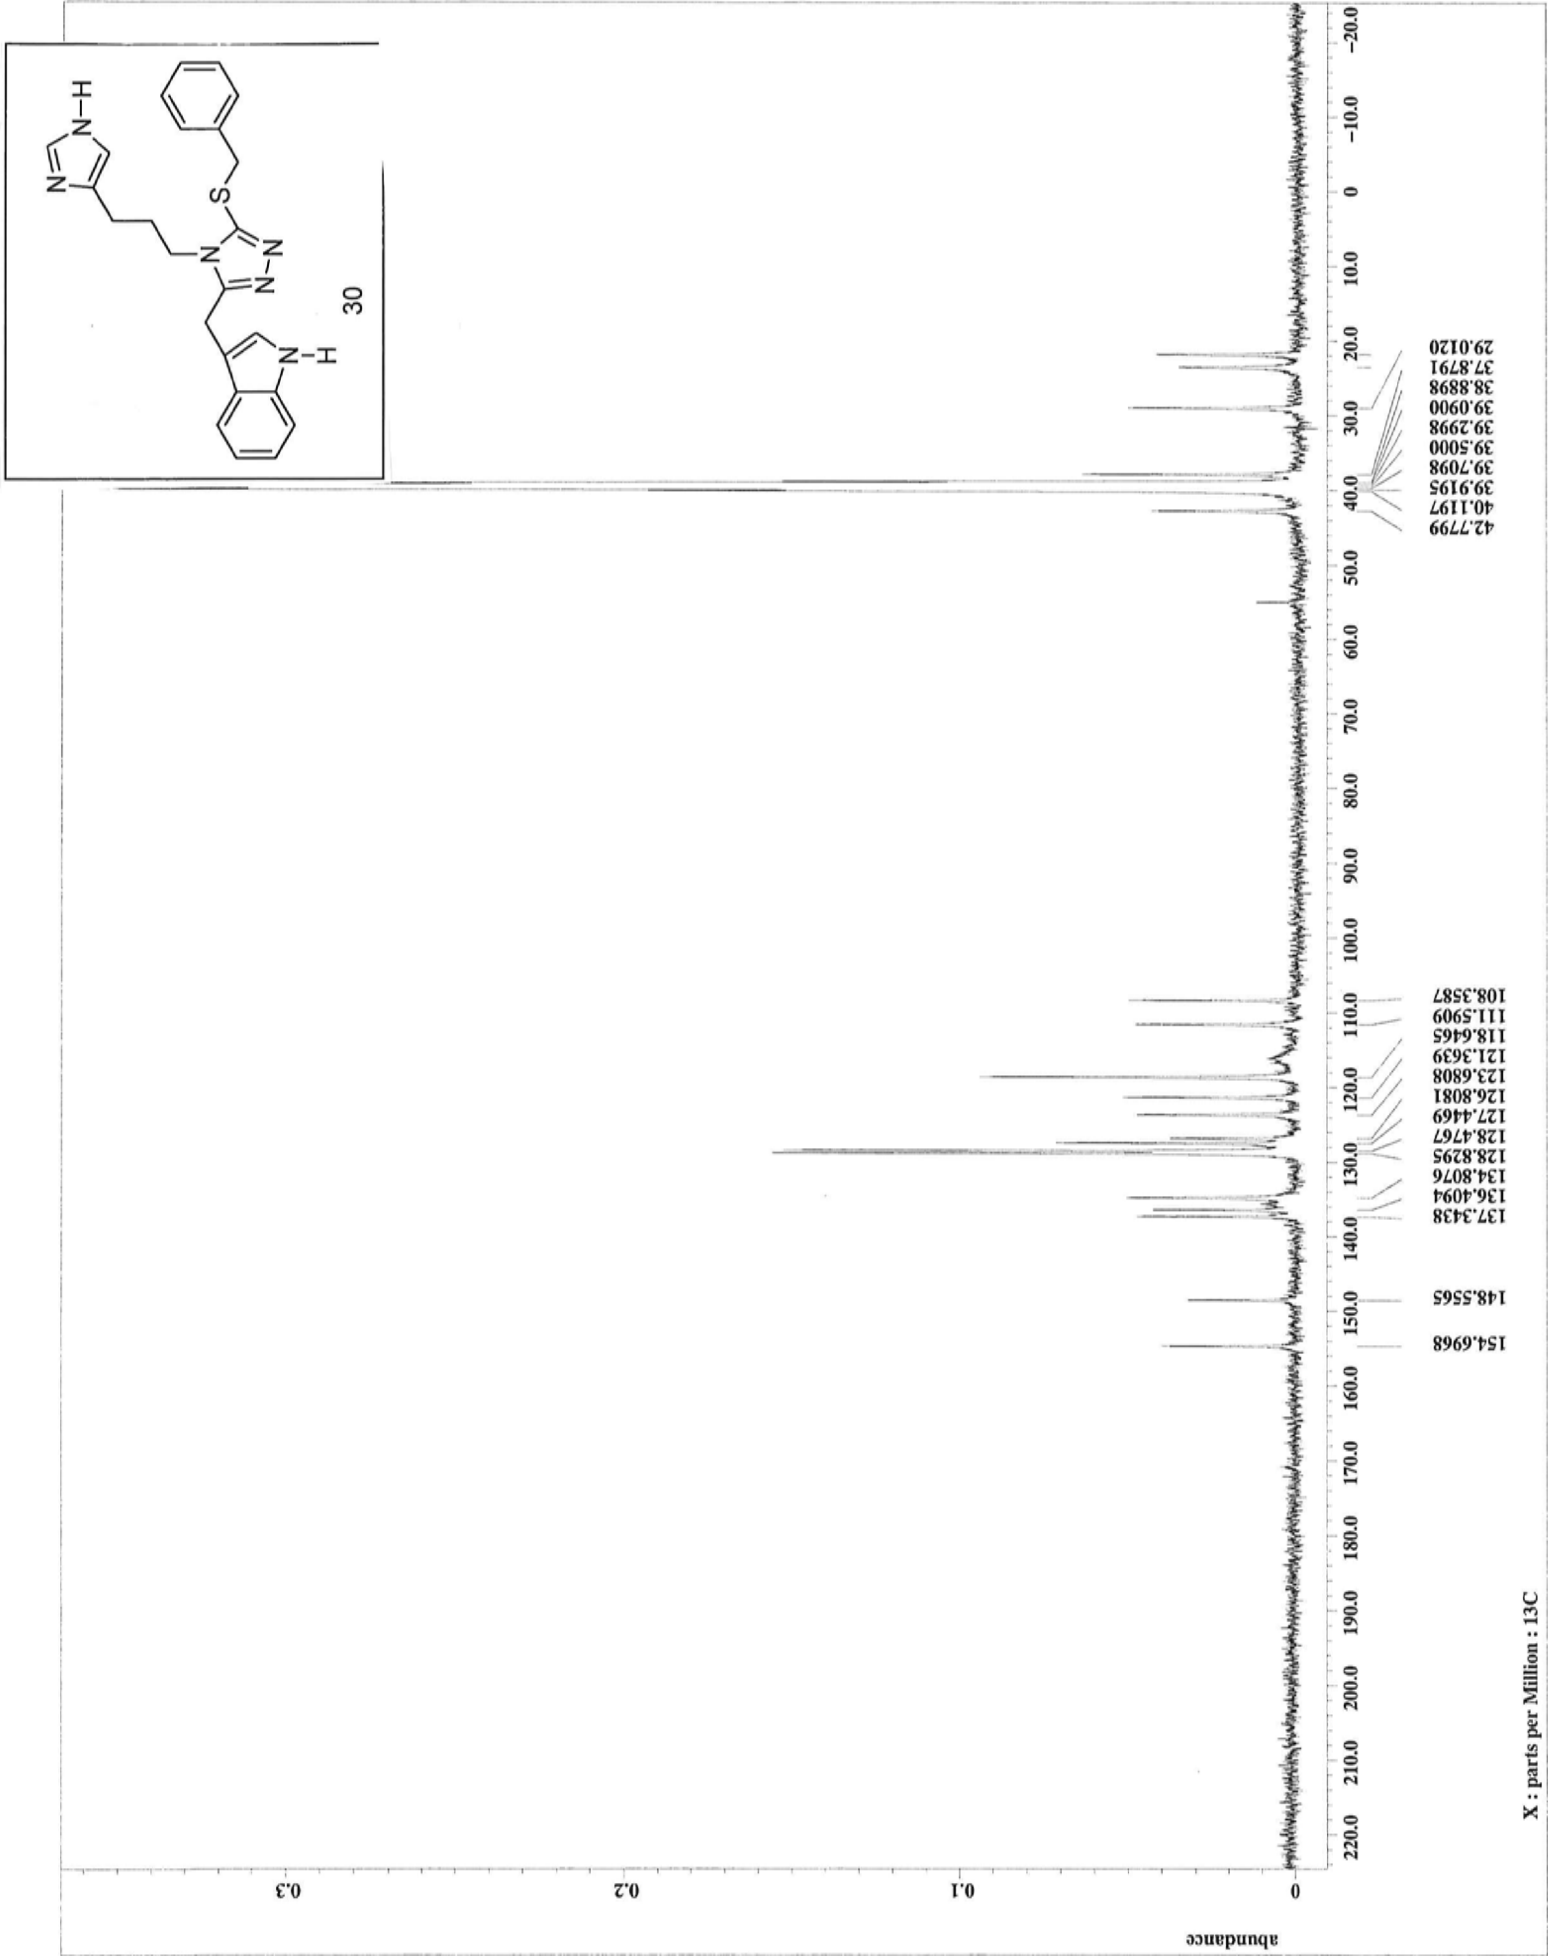

X : parts per Million : 13C

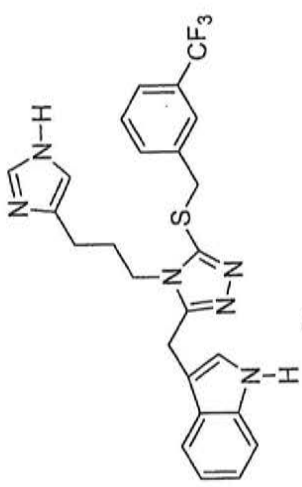

31

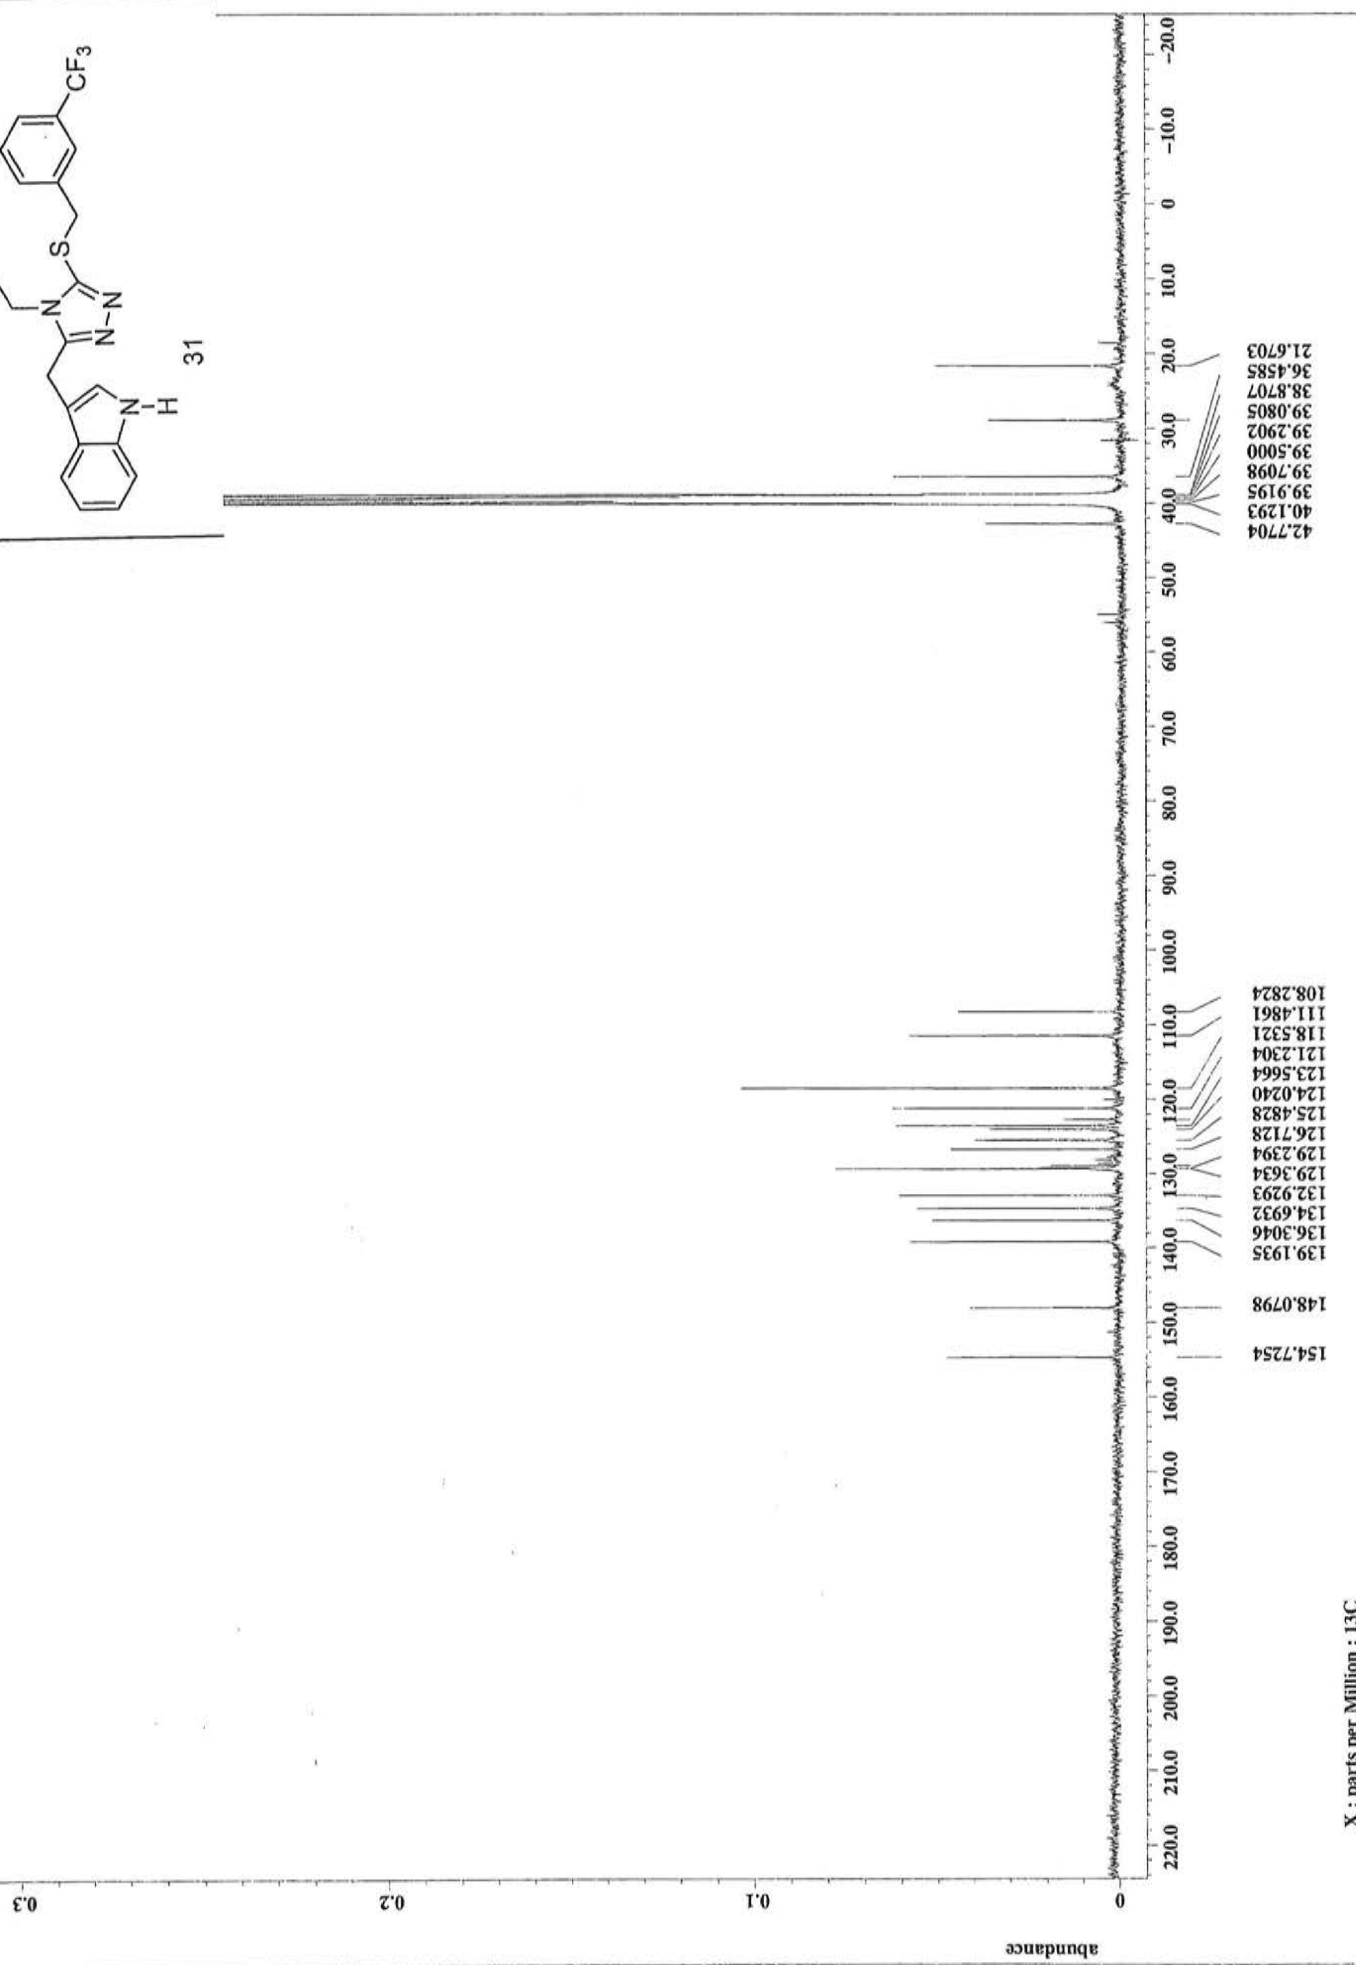

X : parts per Million : 13C

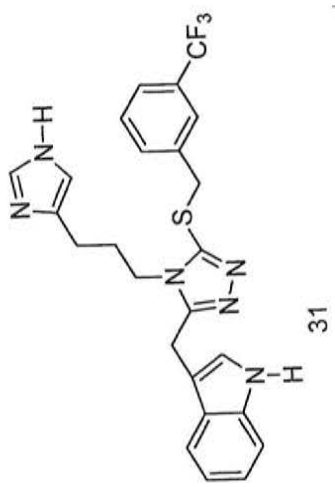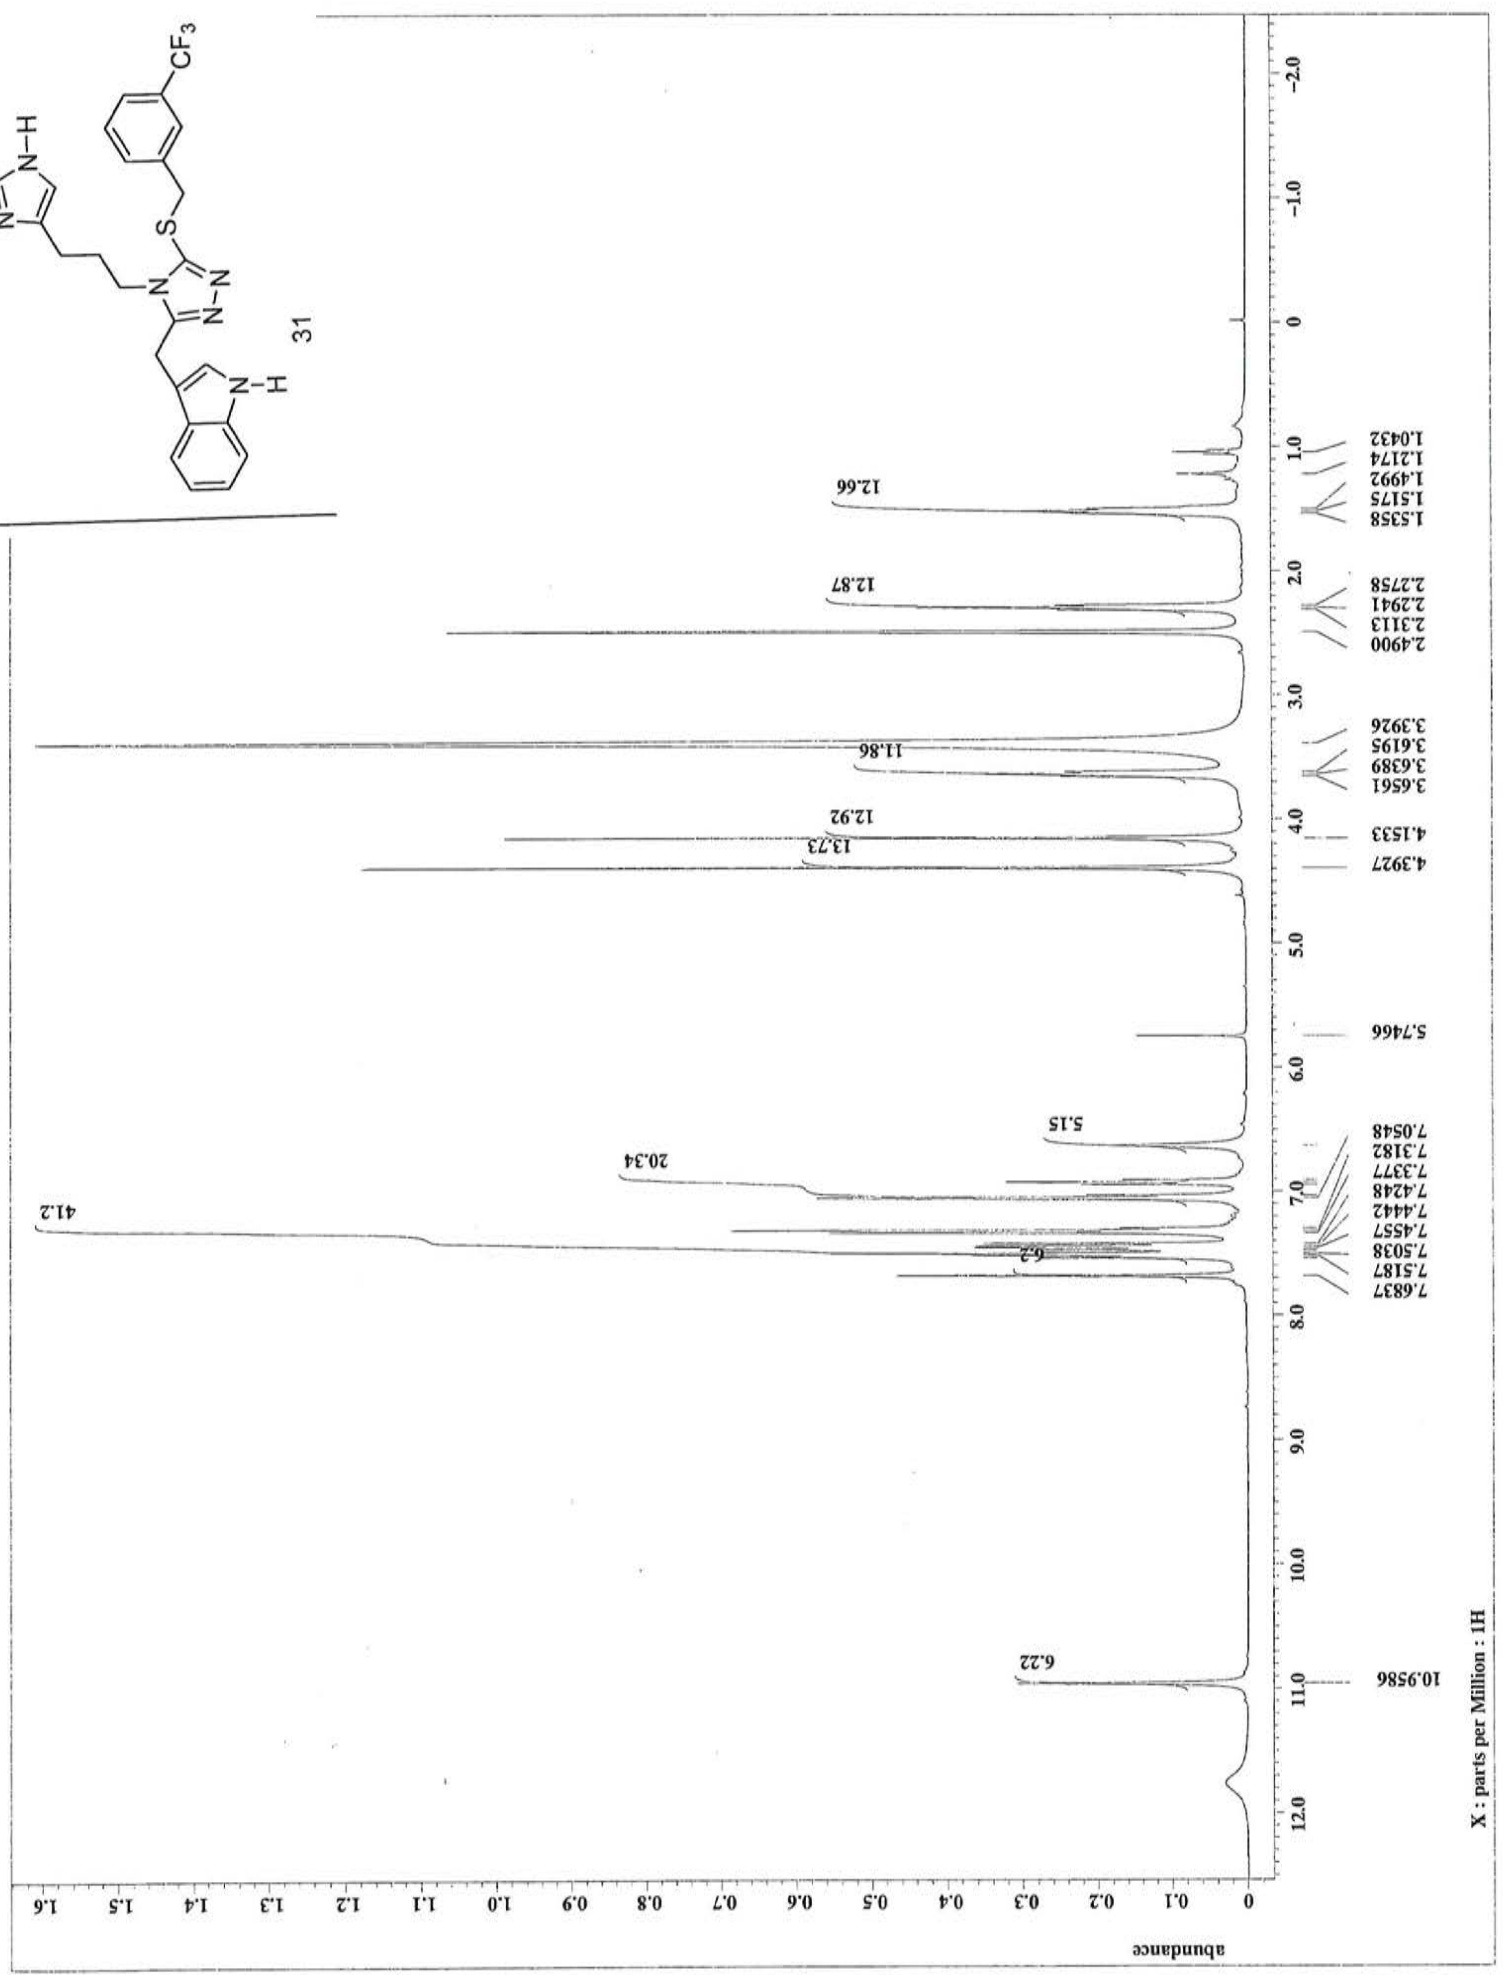

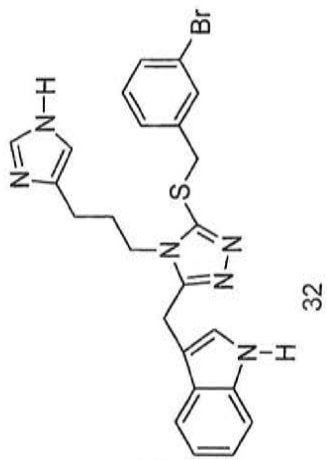

32

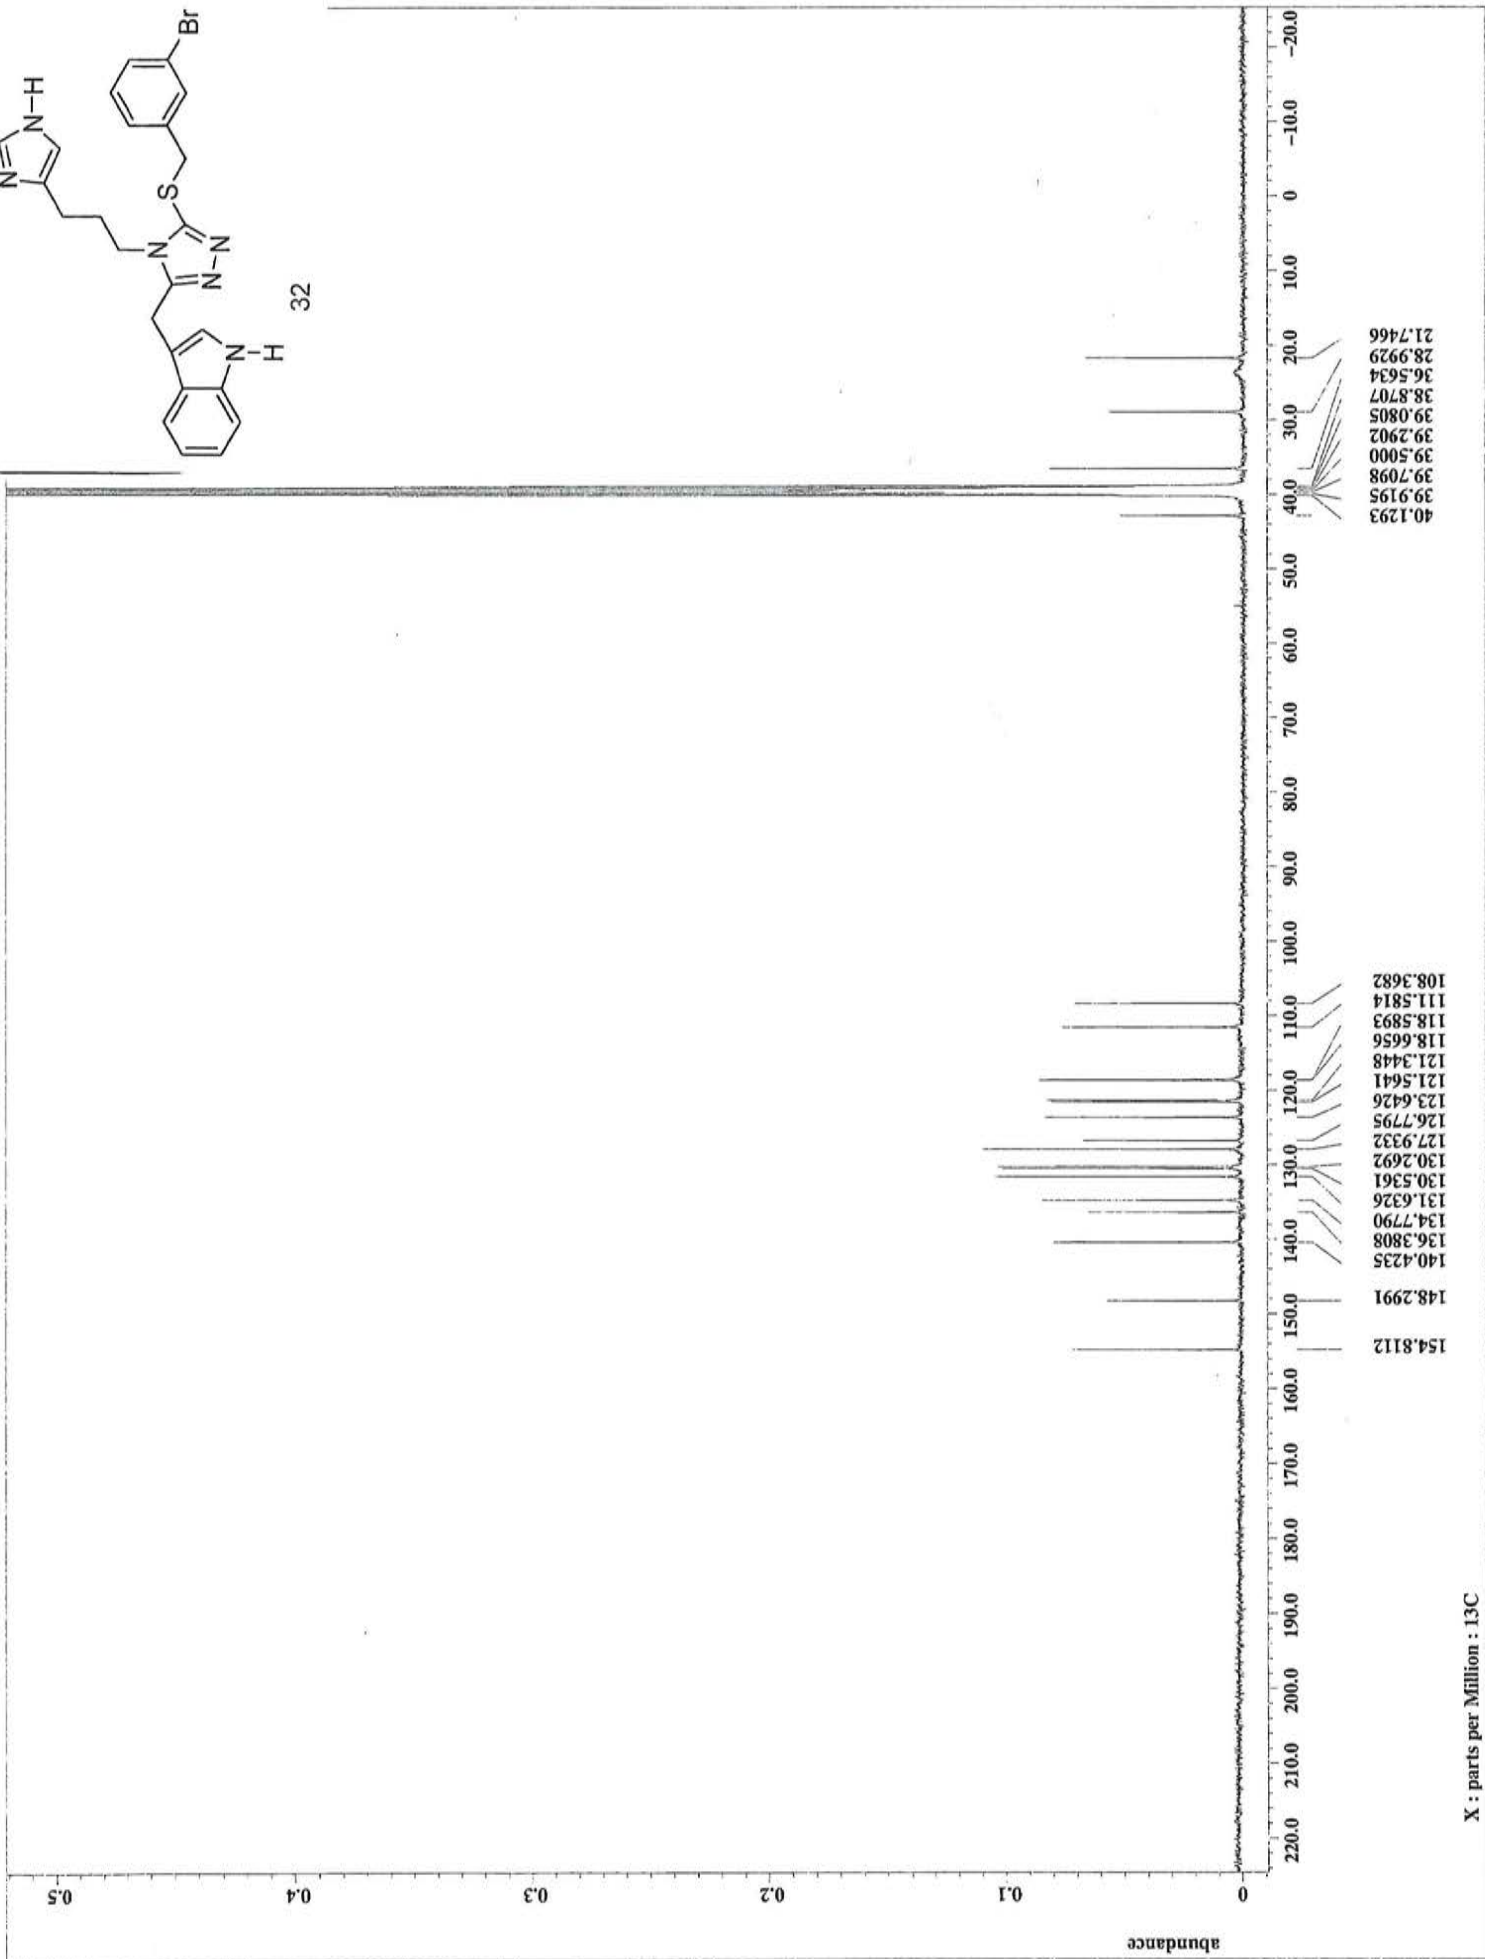

40.1293  
39.9195  
39.7098  
39.5000  
39.2902  
39.0805  
38.8707  
36.5634  
28.9929  
21.7466

154.8112  
148.2991  
140.4235  
136.3808  
134.7790  
131.6326  
130.5361  
130.2692  
127.9332  
126.7795  
123.6426  
121.5641  
121.3448  
118.6656  
118.5893  
111.5814  
108.3682

X : parts per Million : 13C

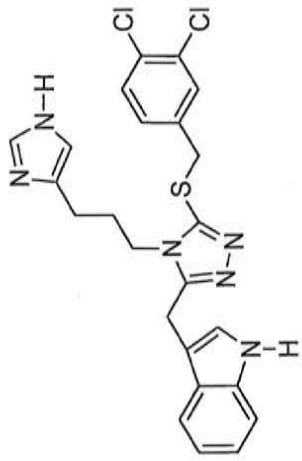

33

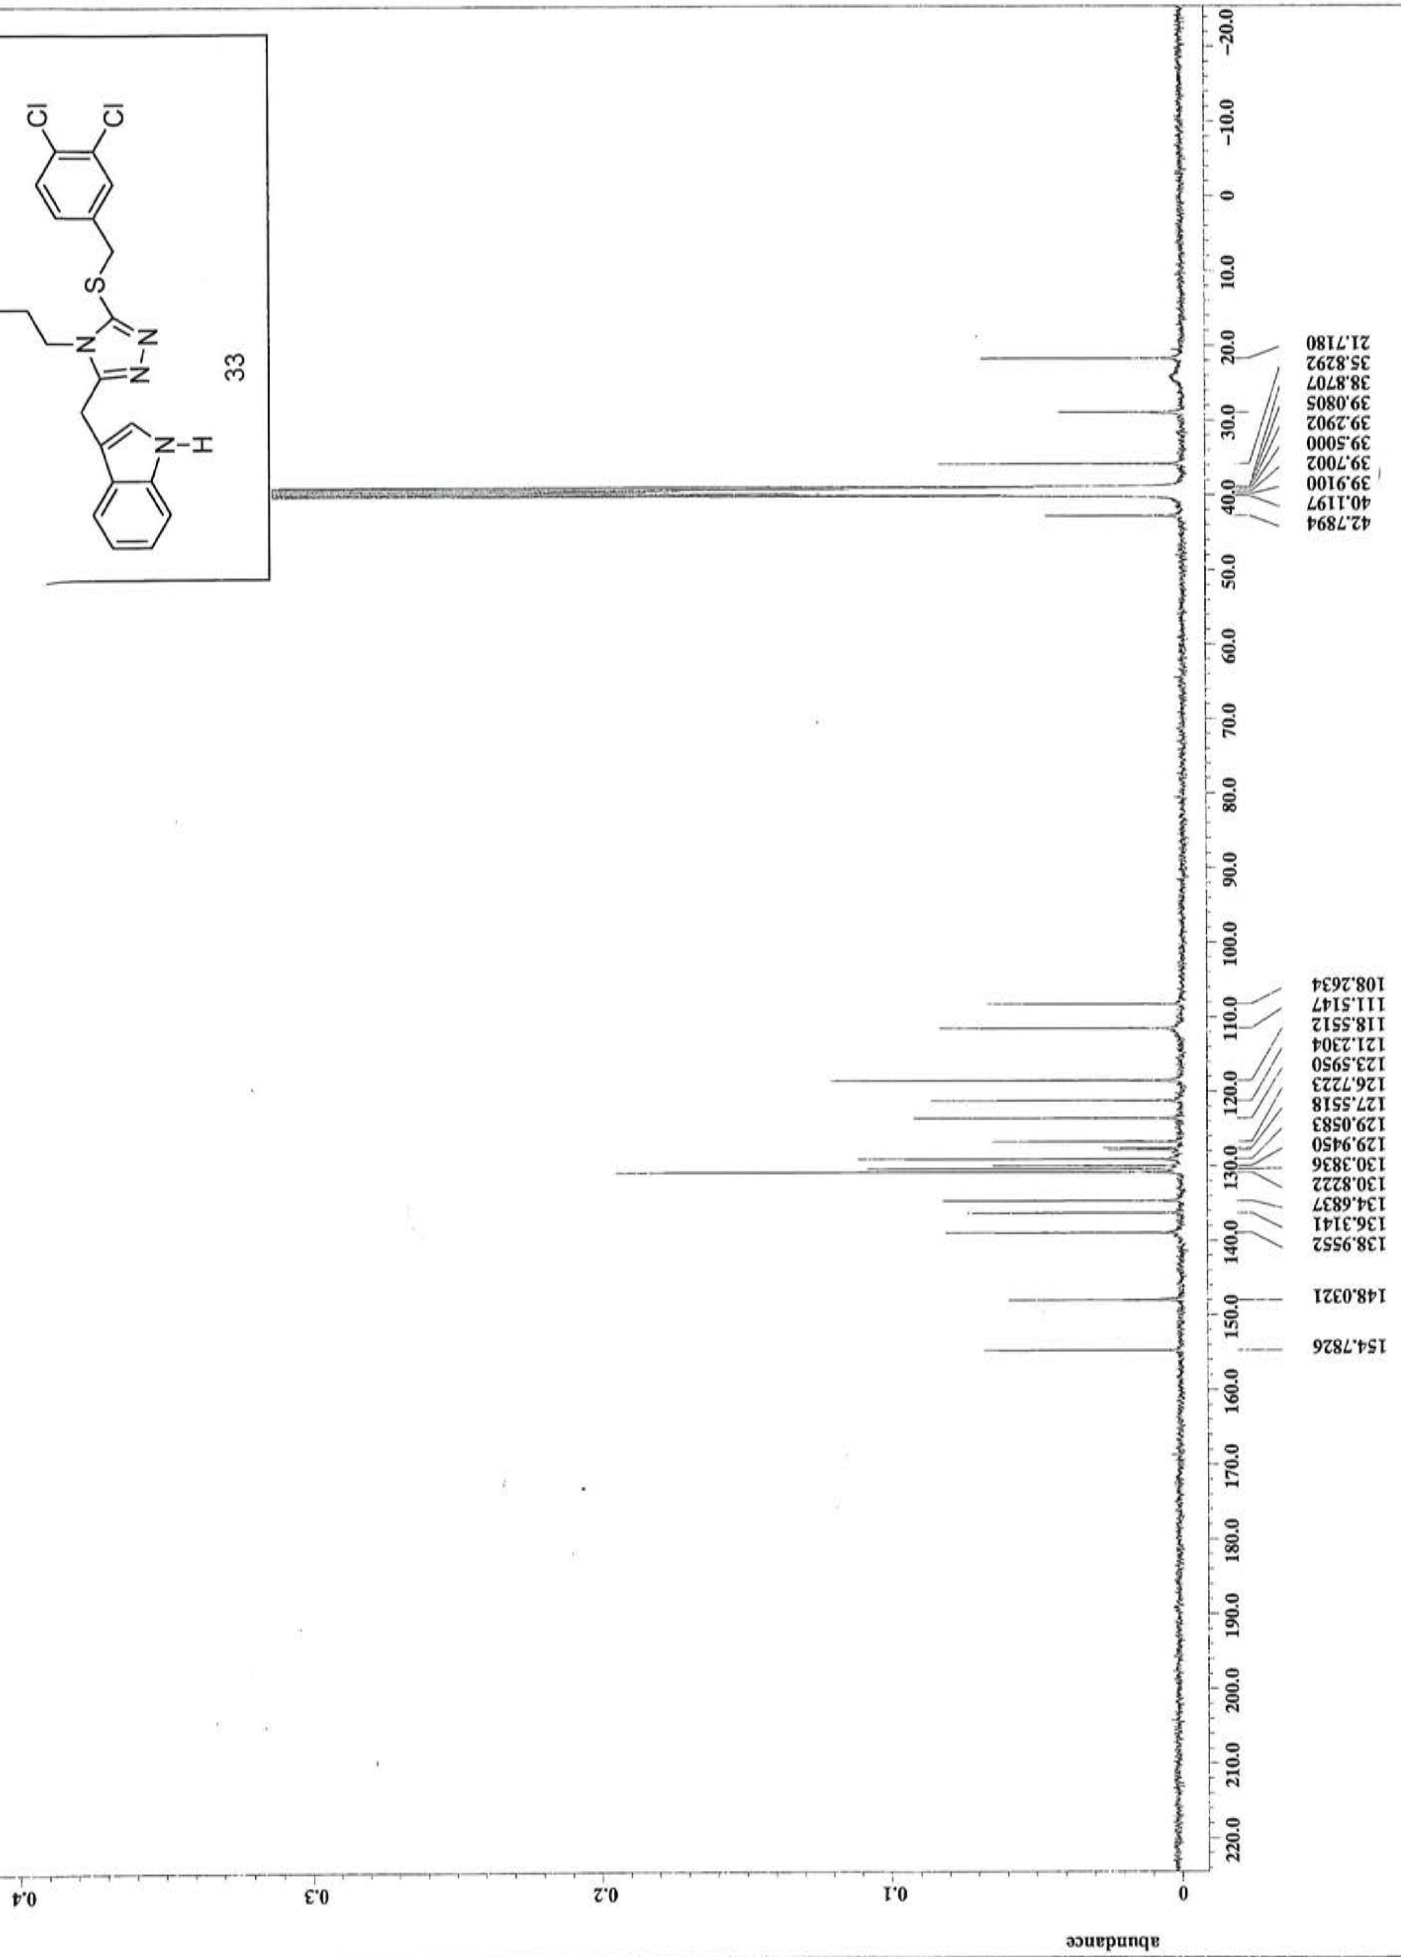

X : parts per Million : 13C

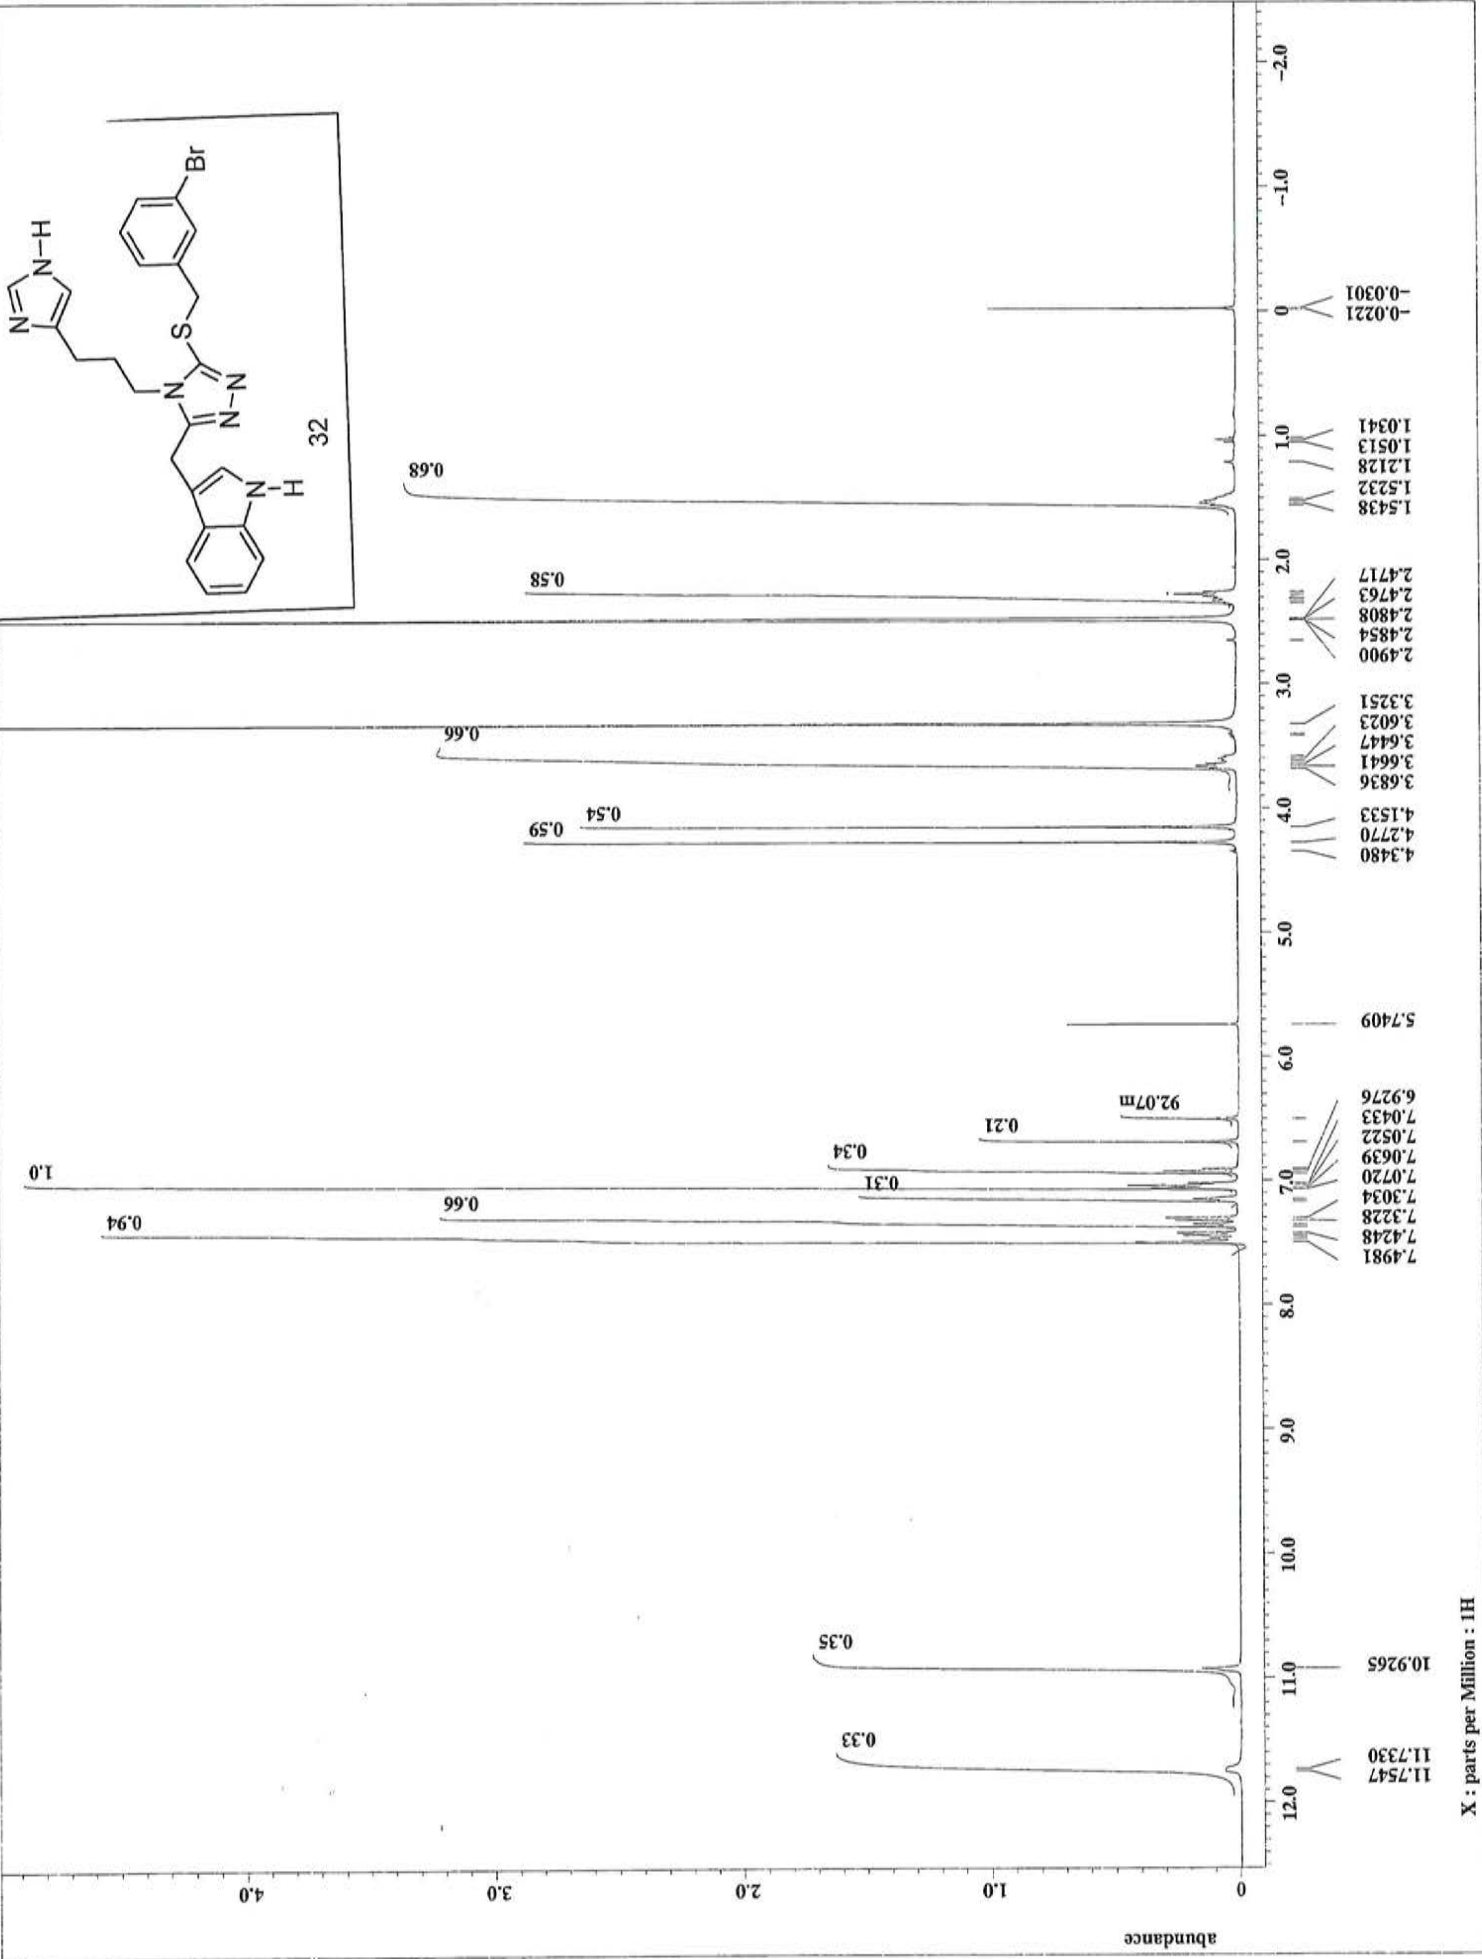

X : parts per Million : 1H



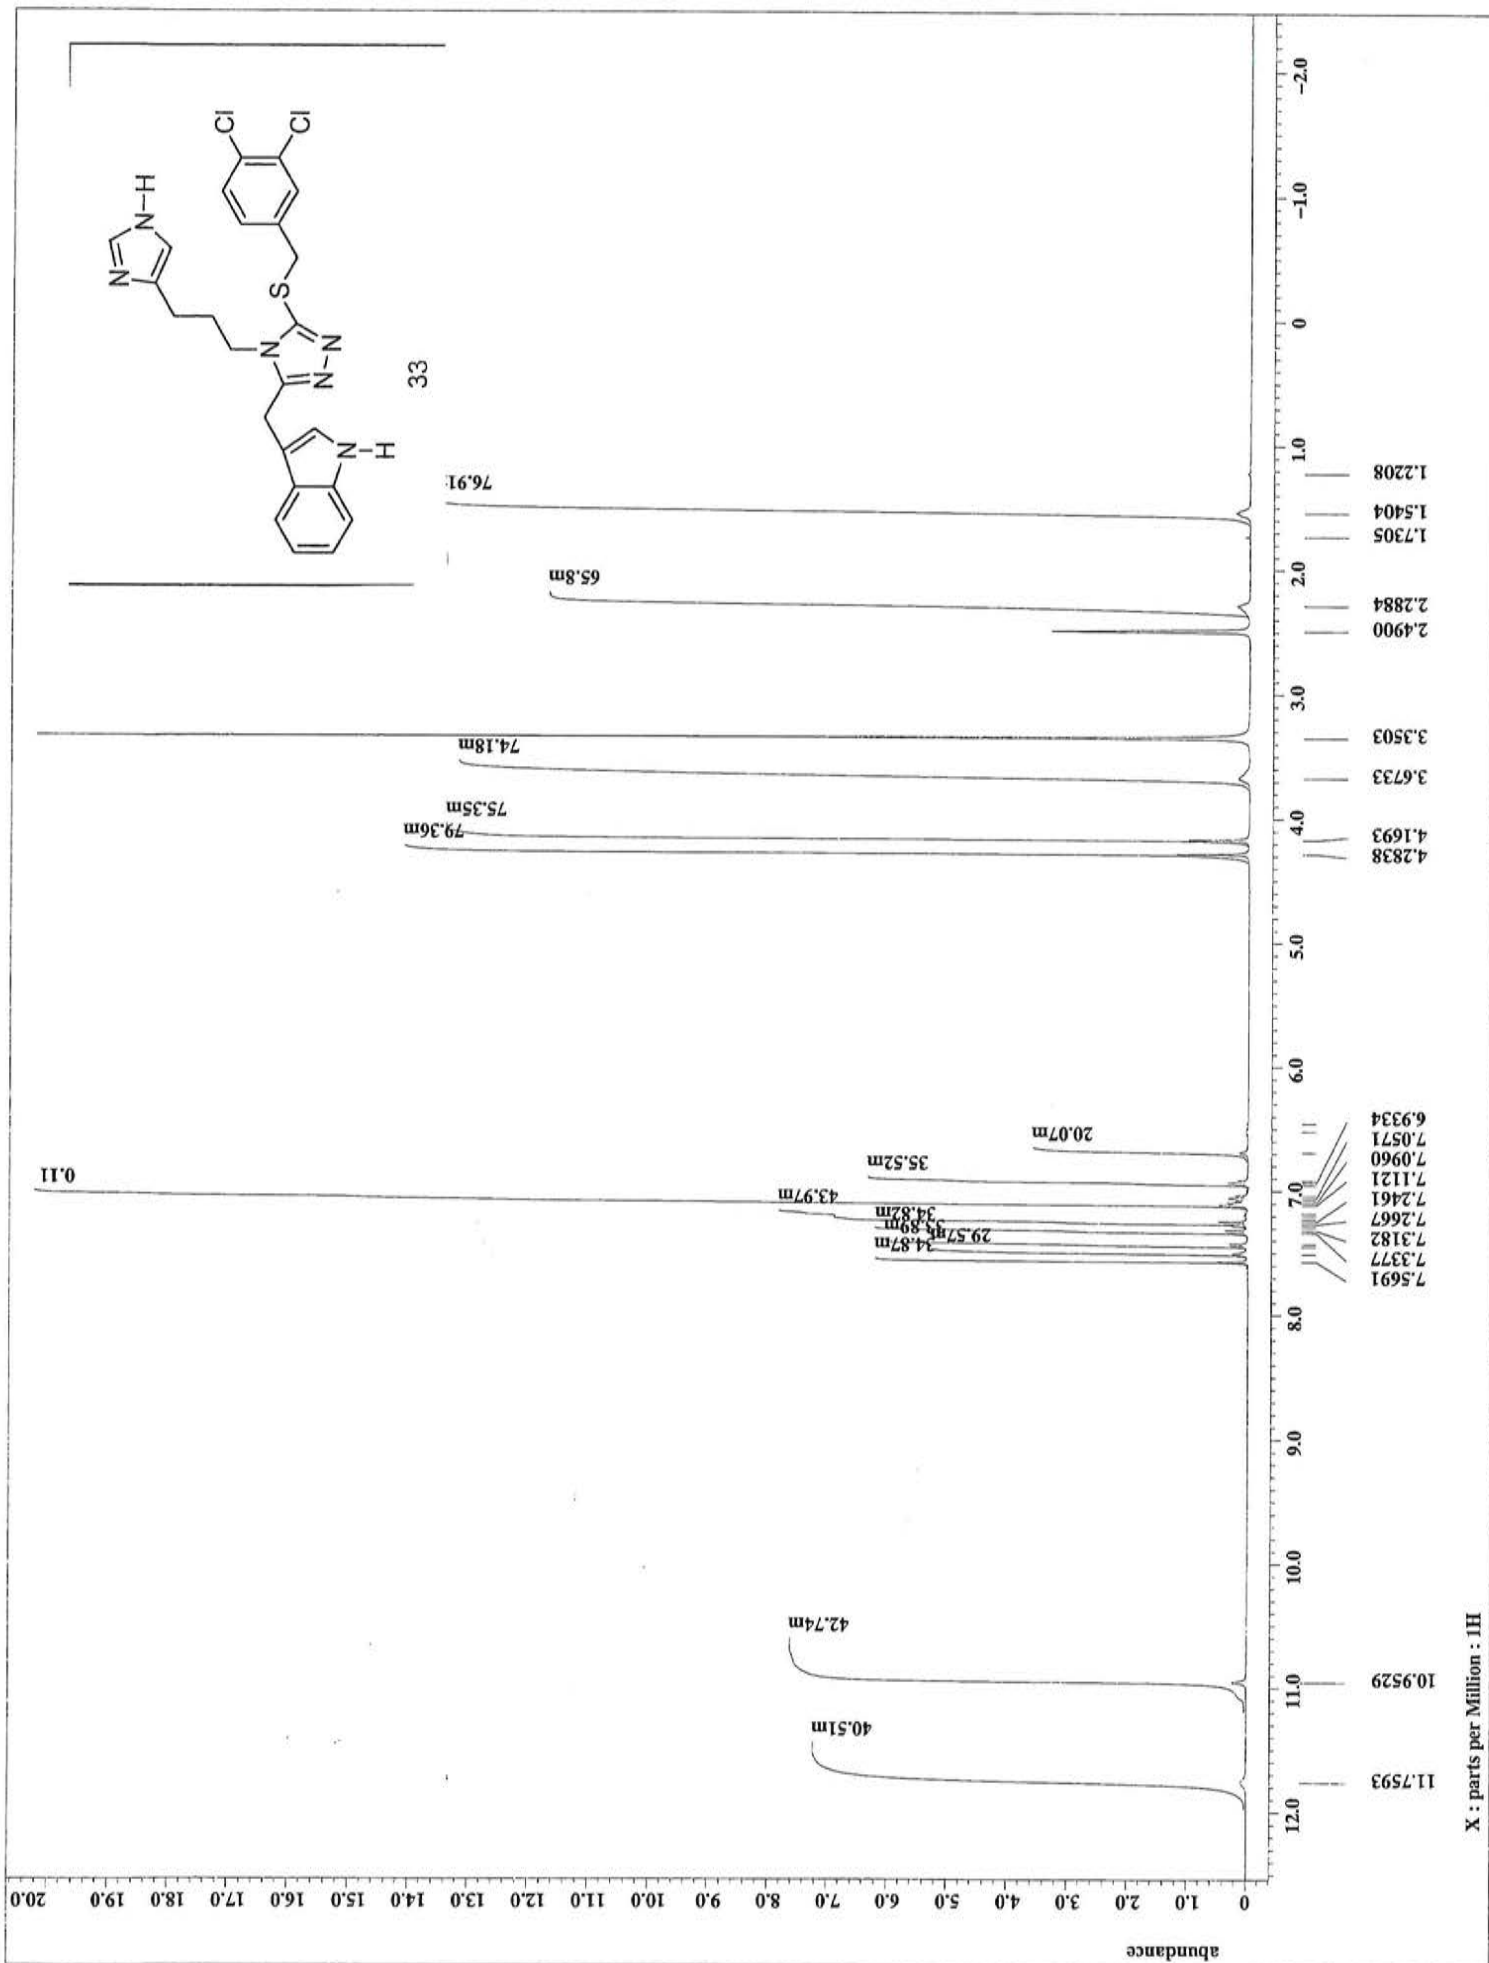

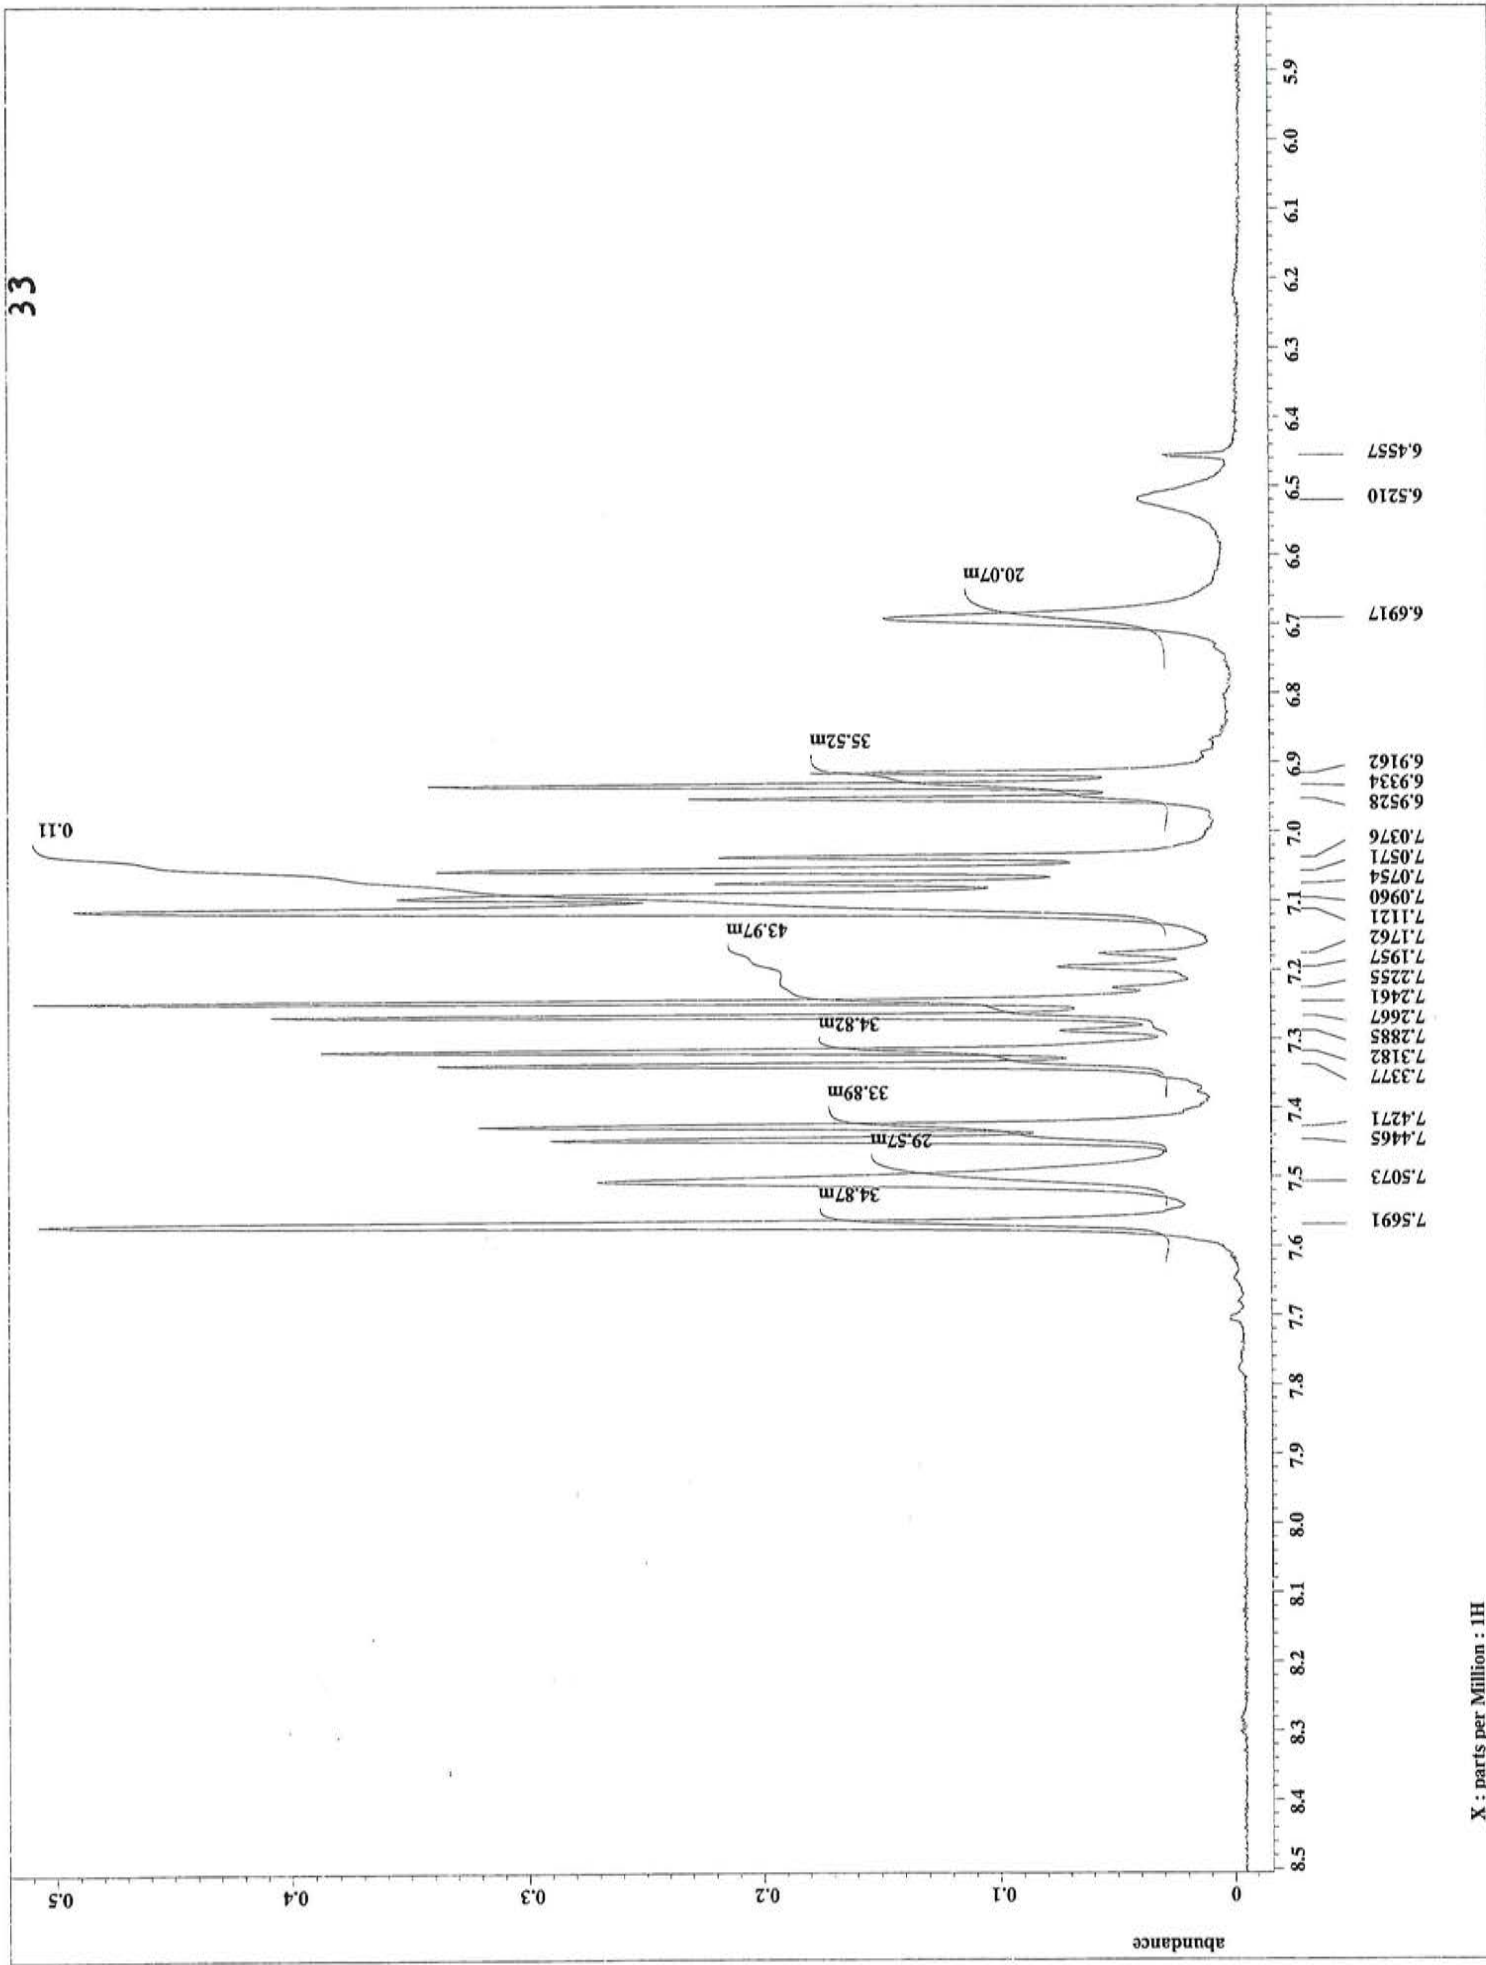

abundance

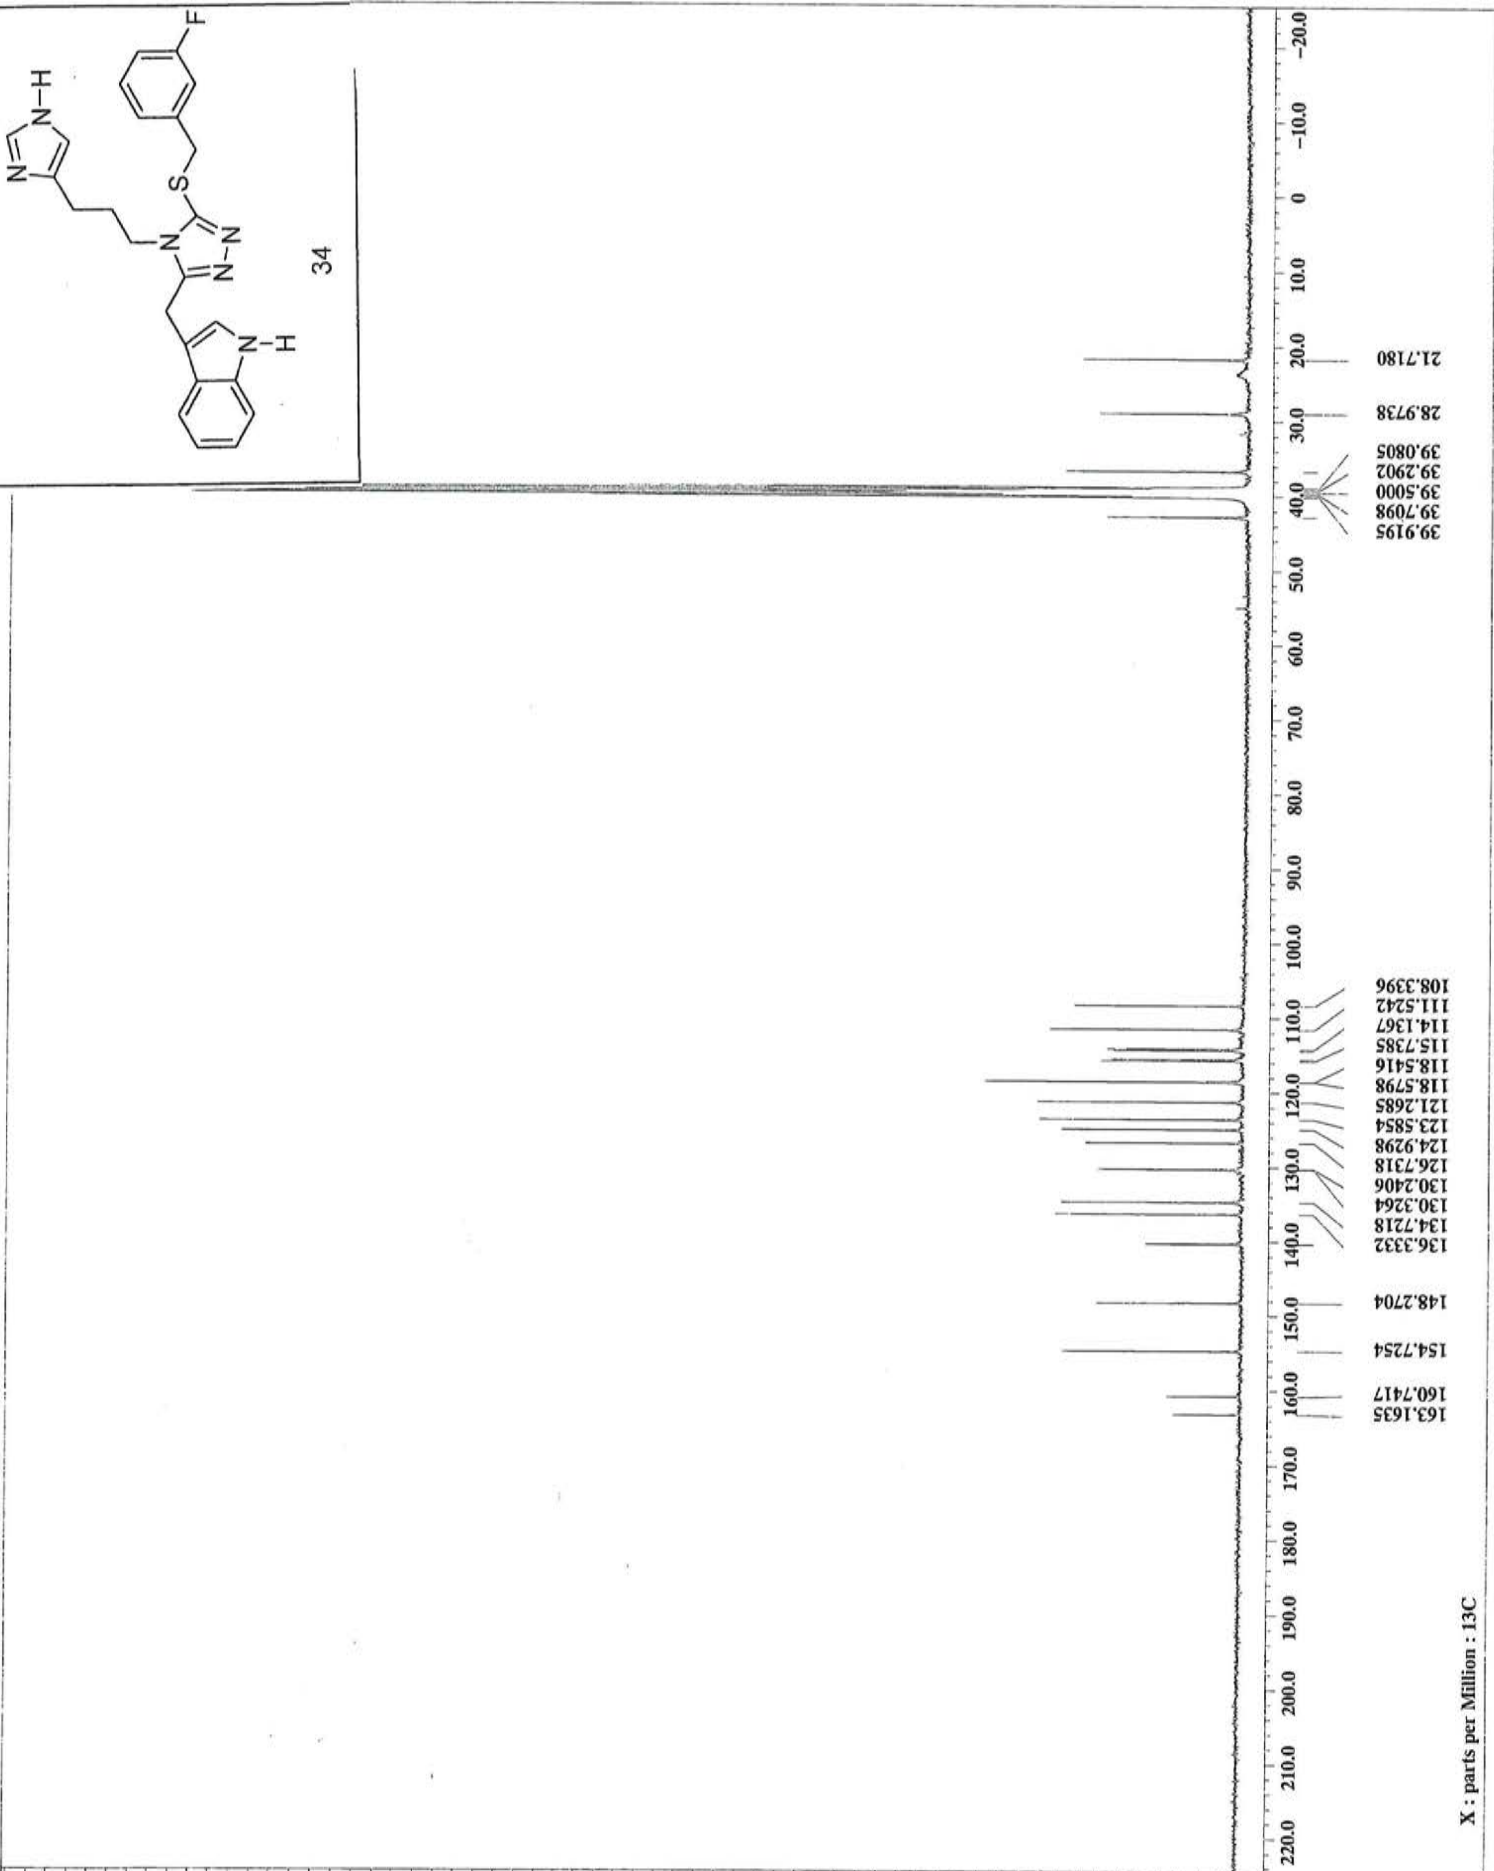

34

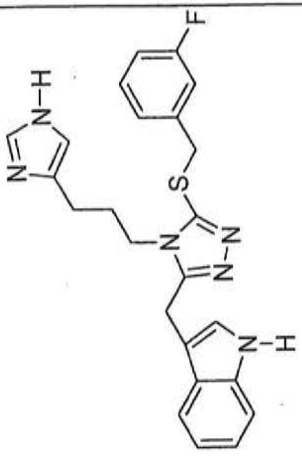

X : parts per Million : 13C

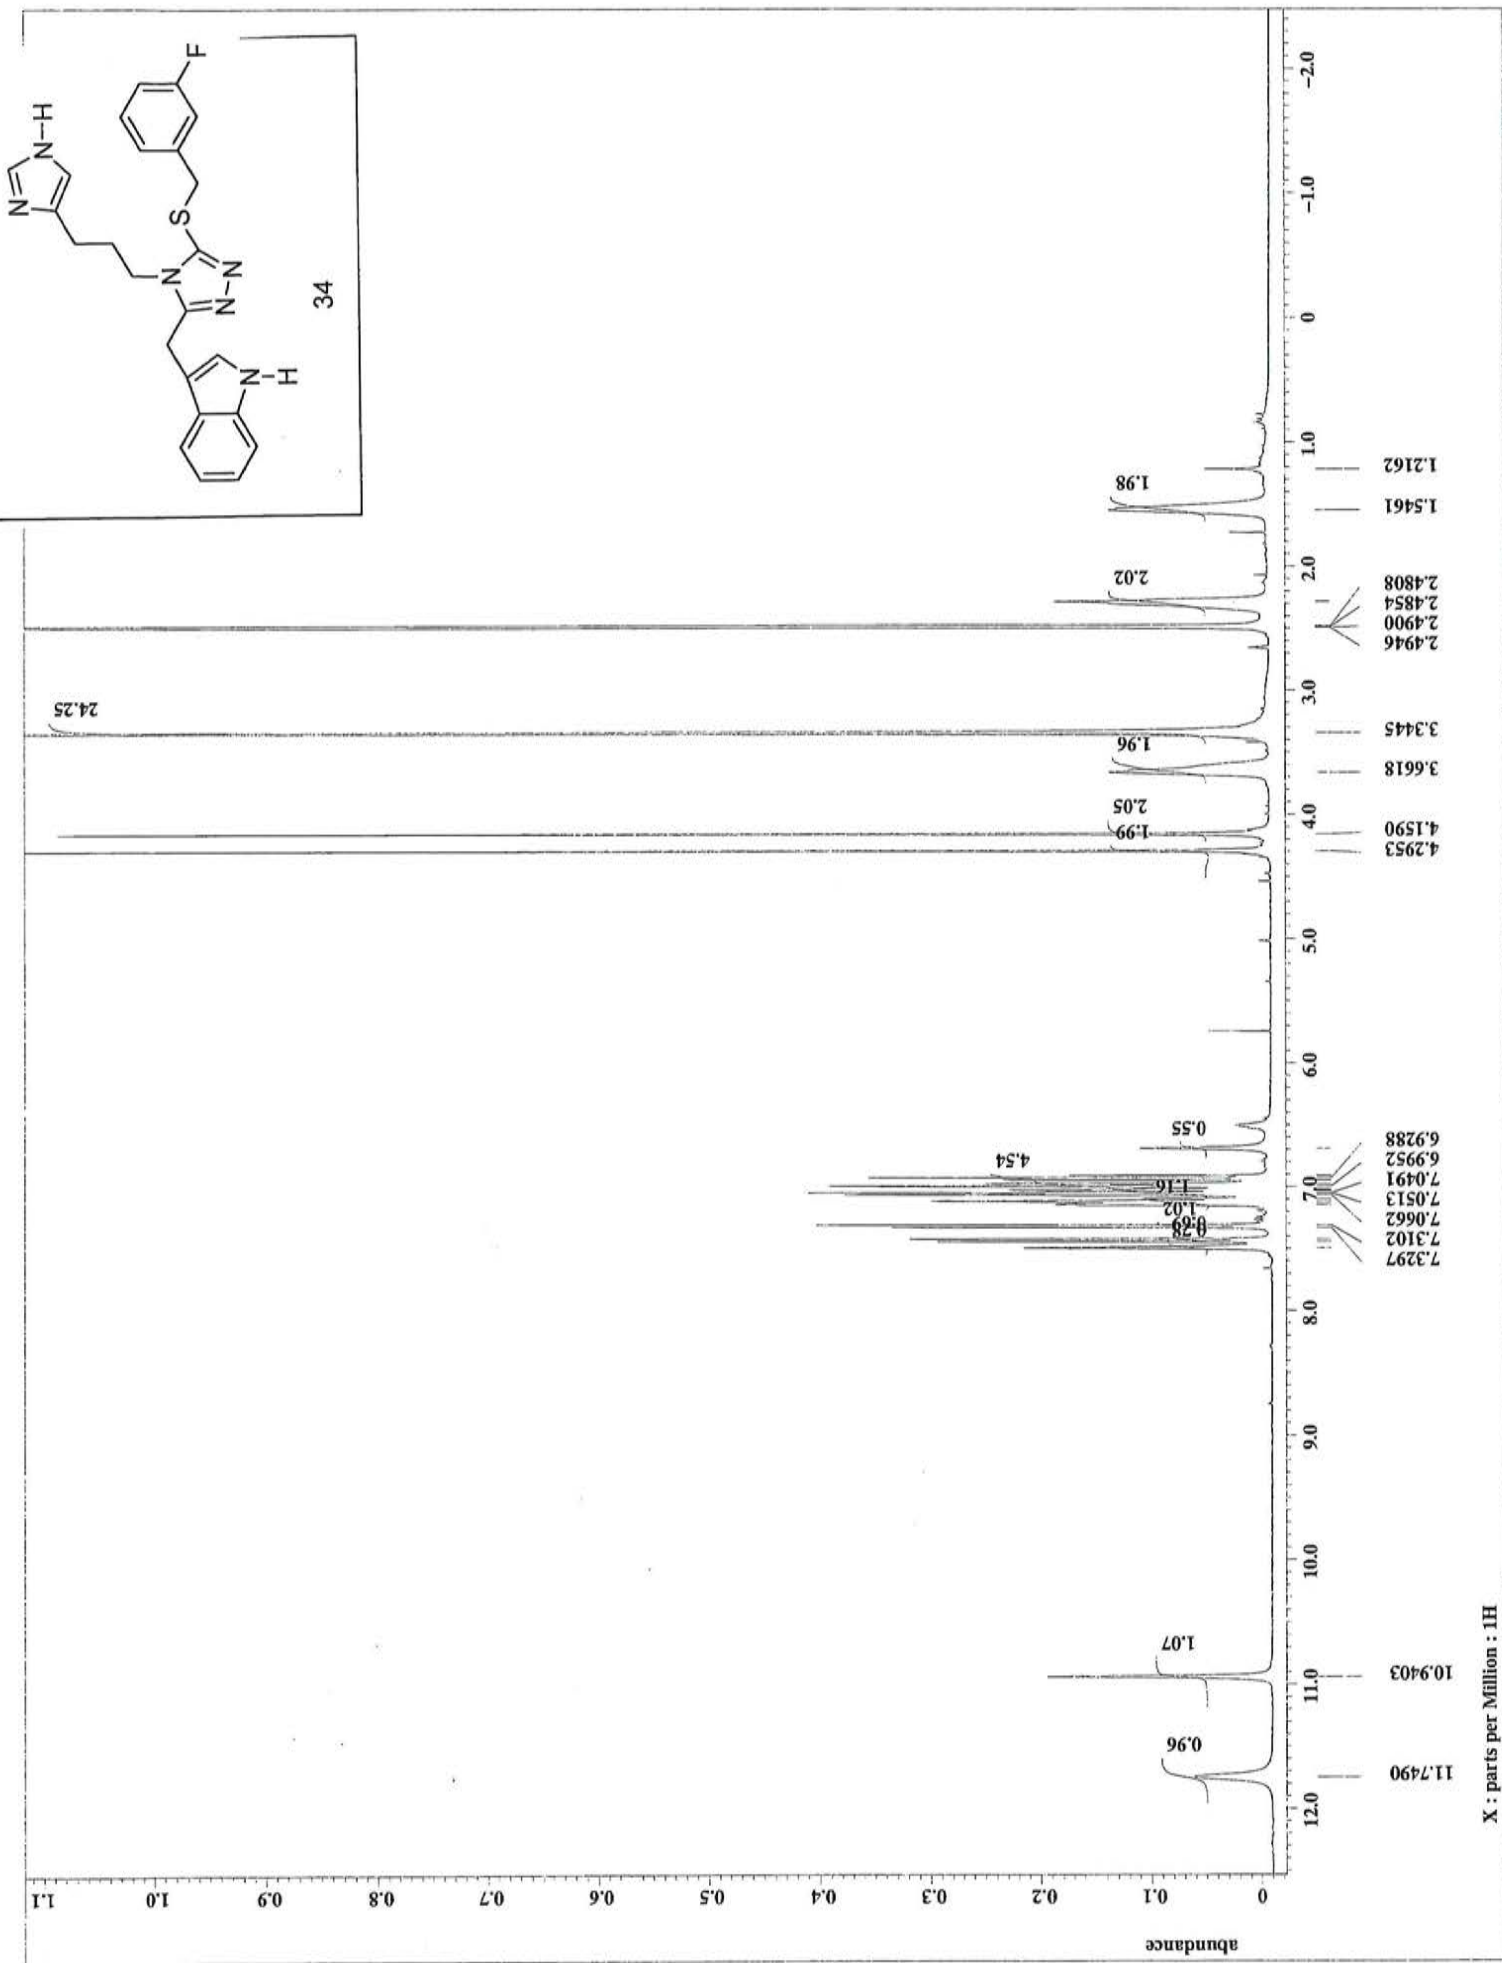

X : parts per Million : 1H

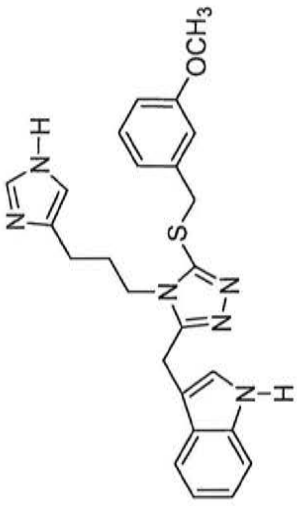

35

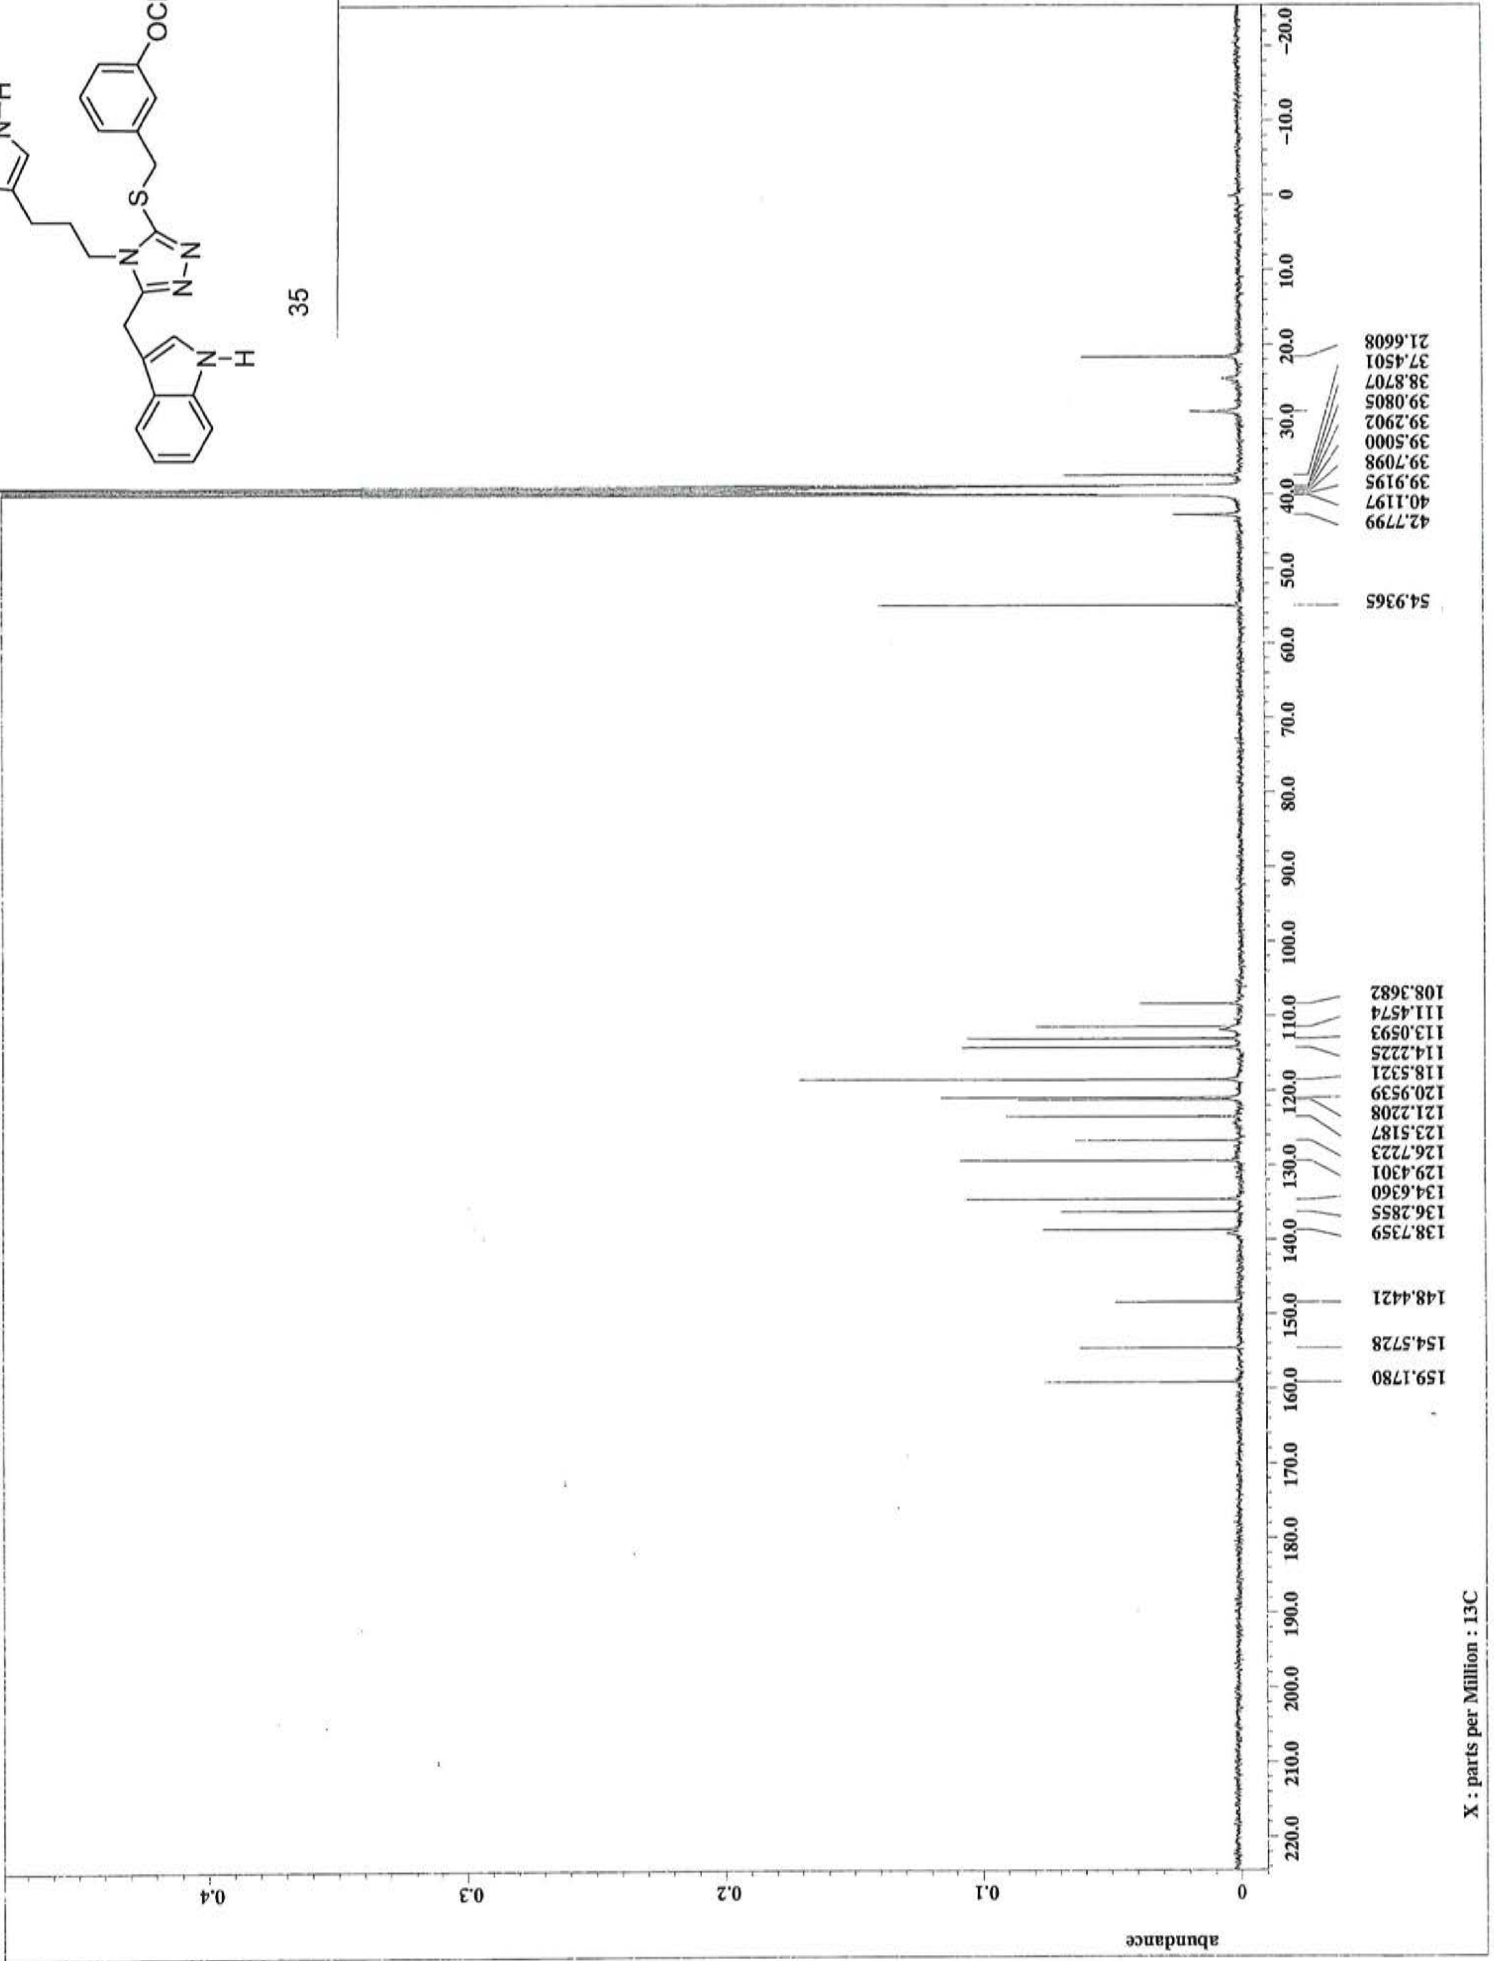

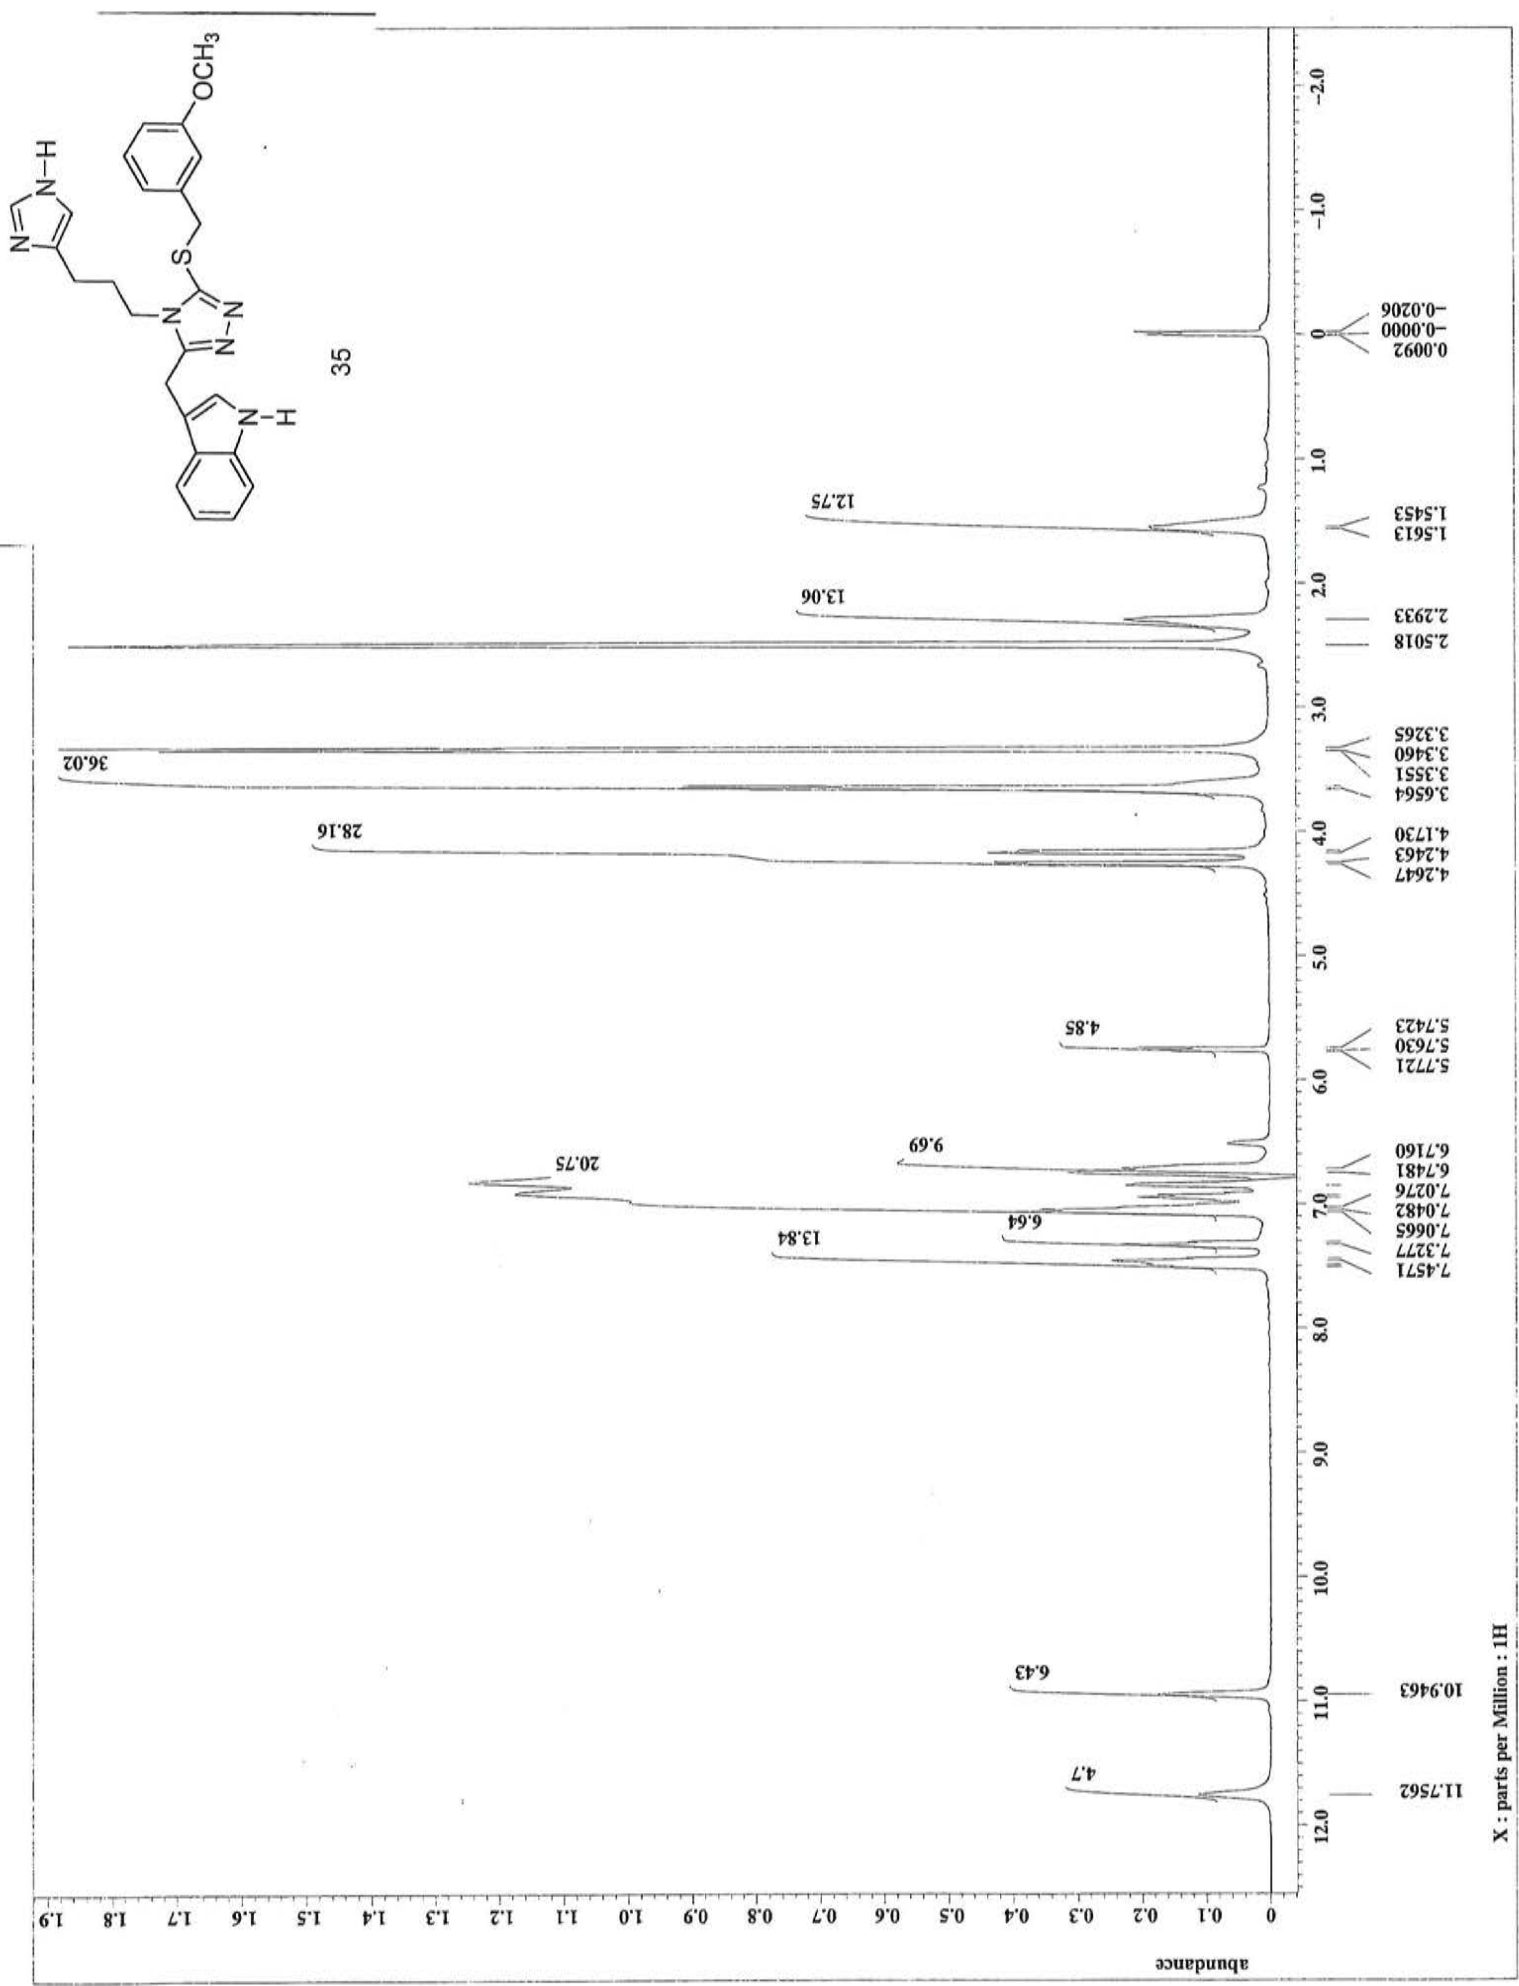

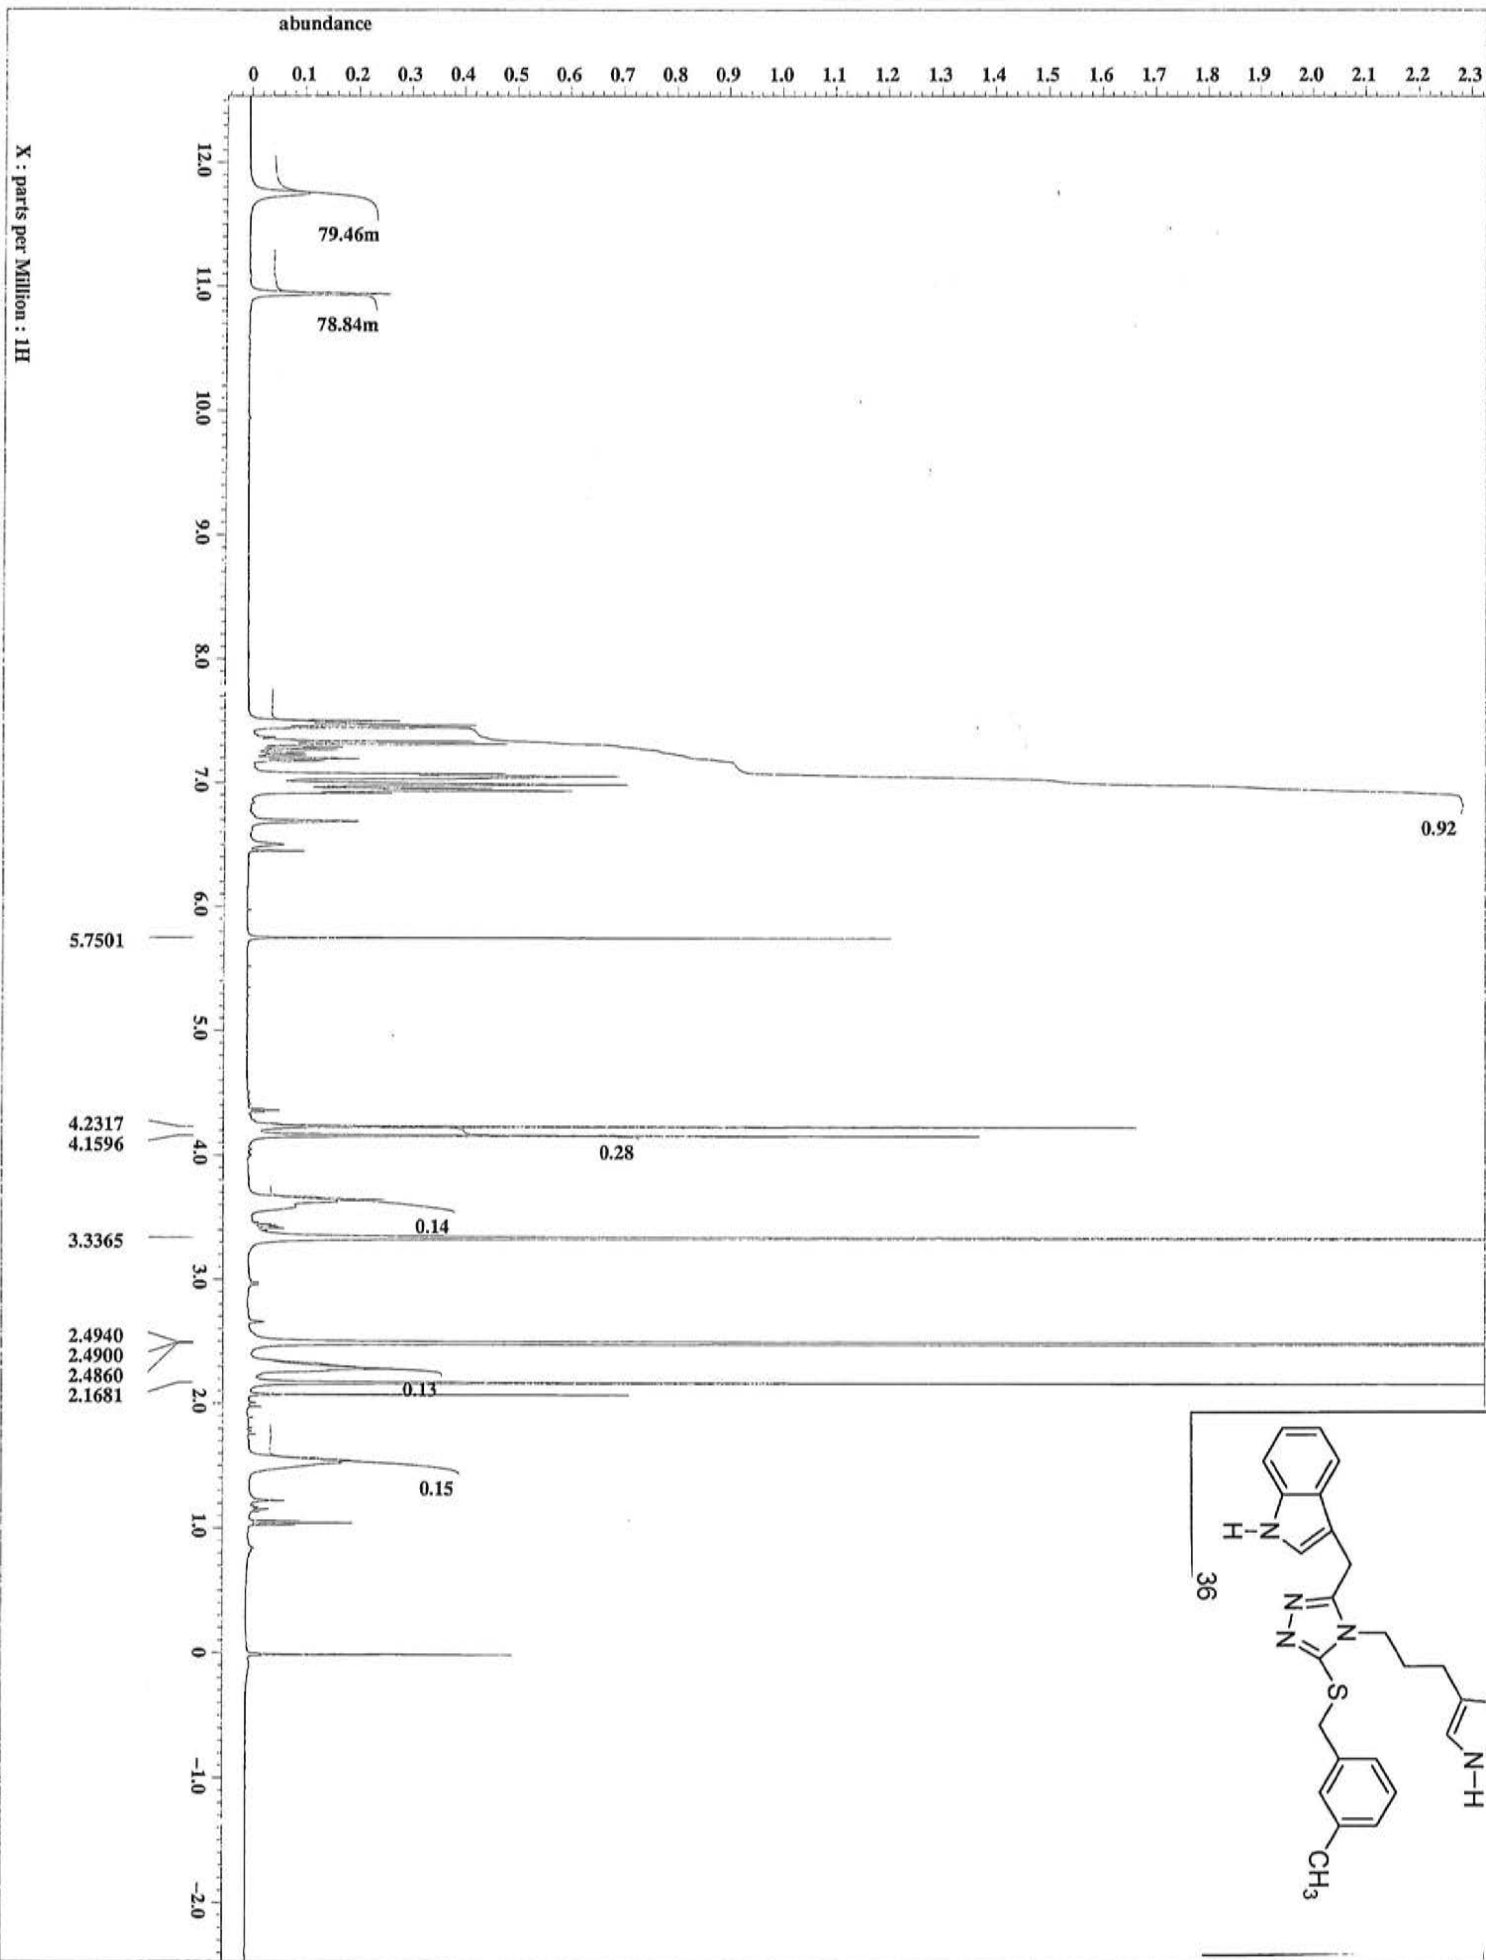

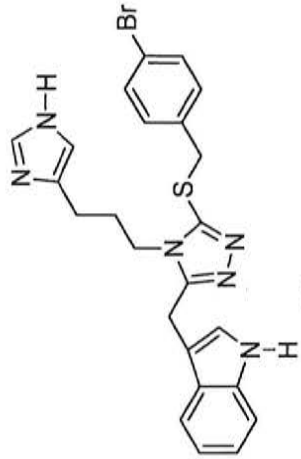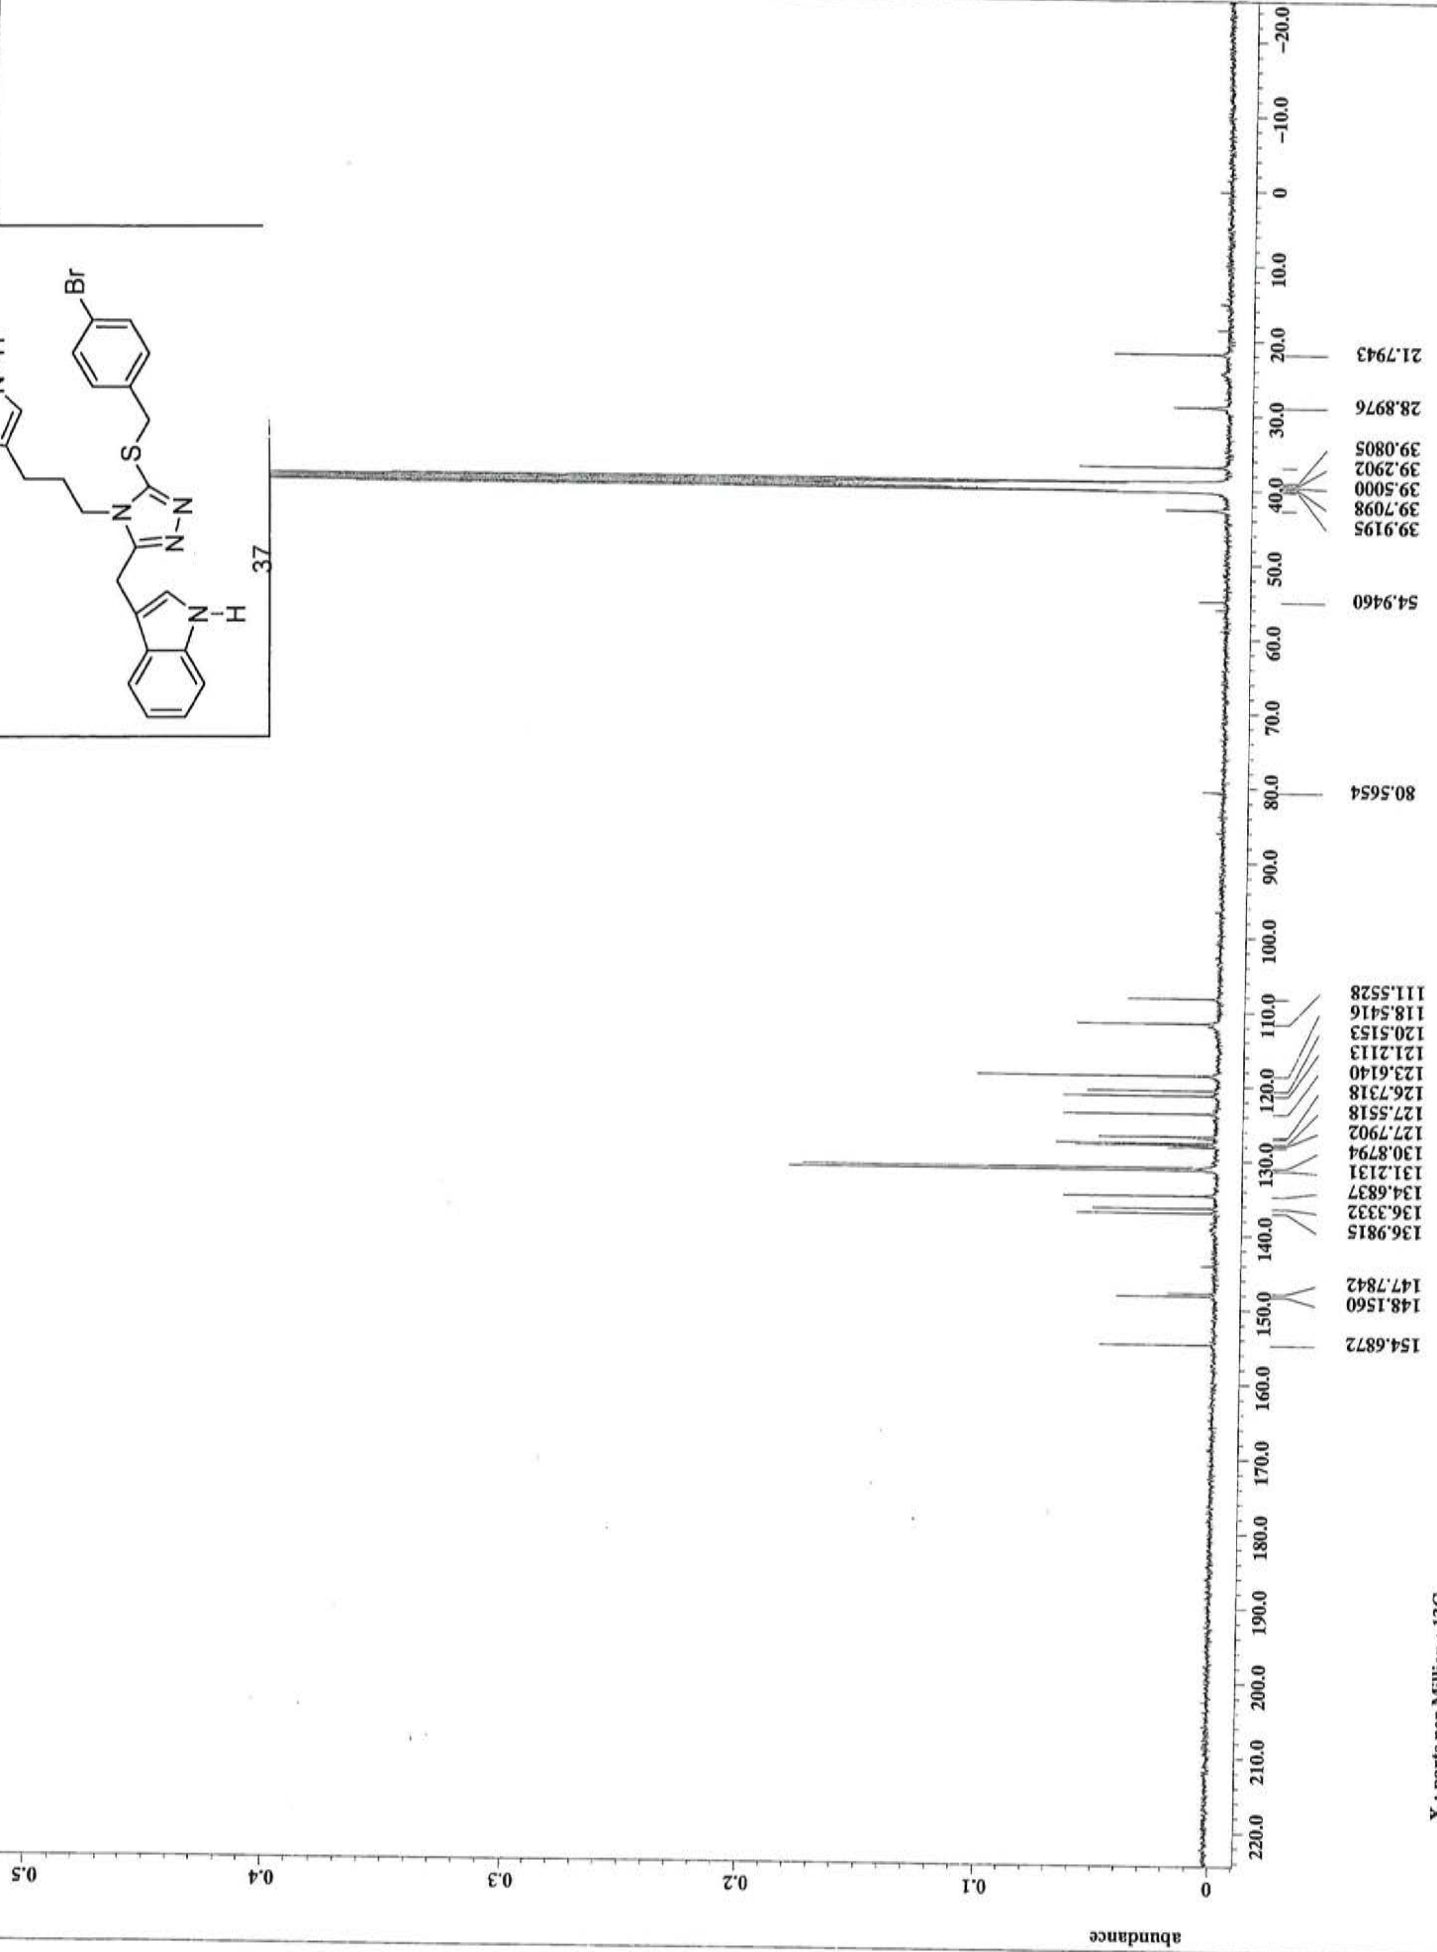

X : parts per Million : 13C



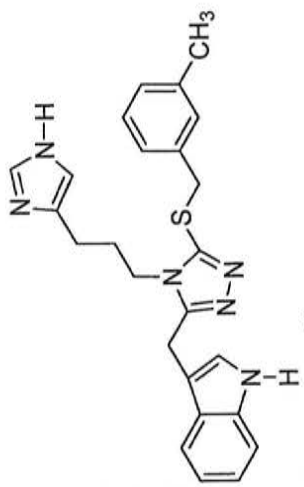

36

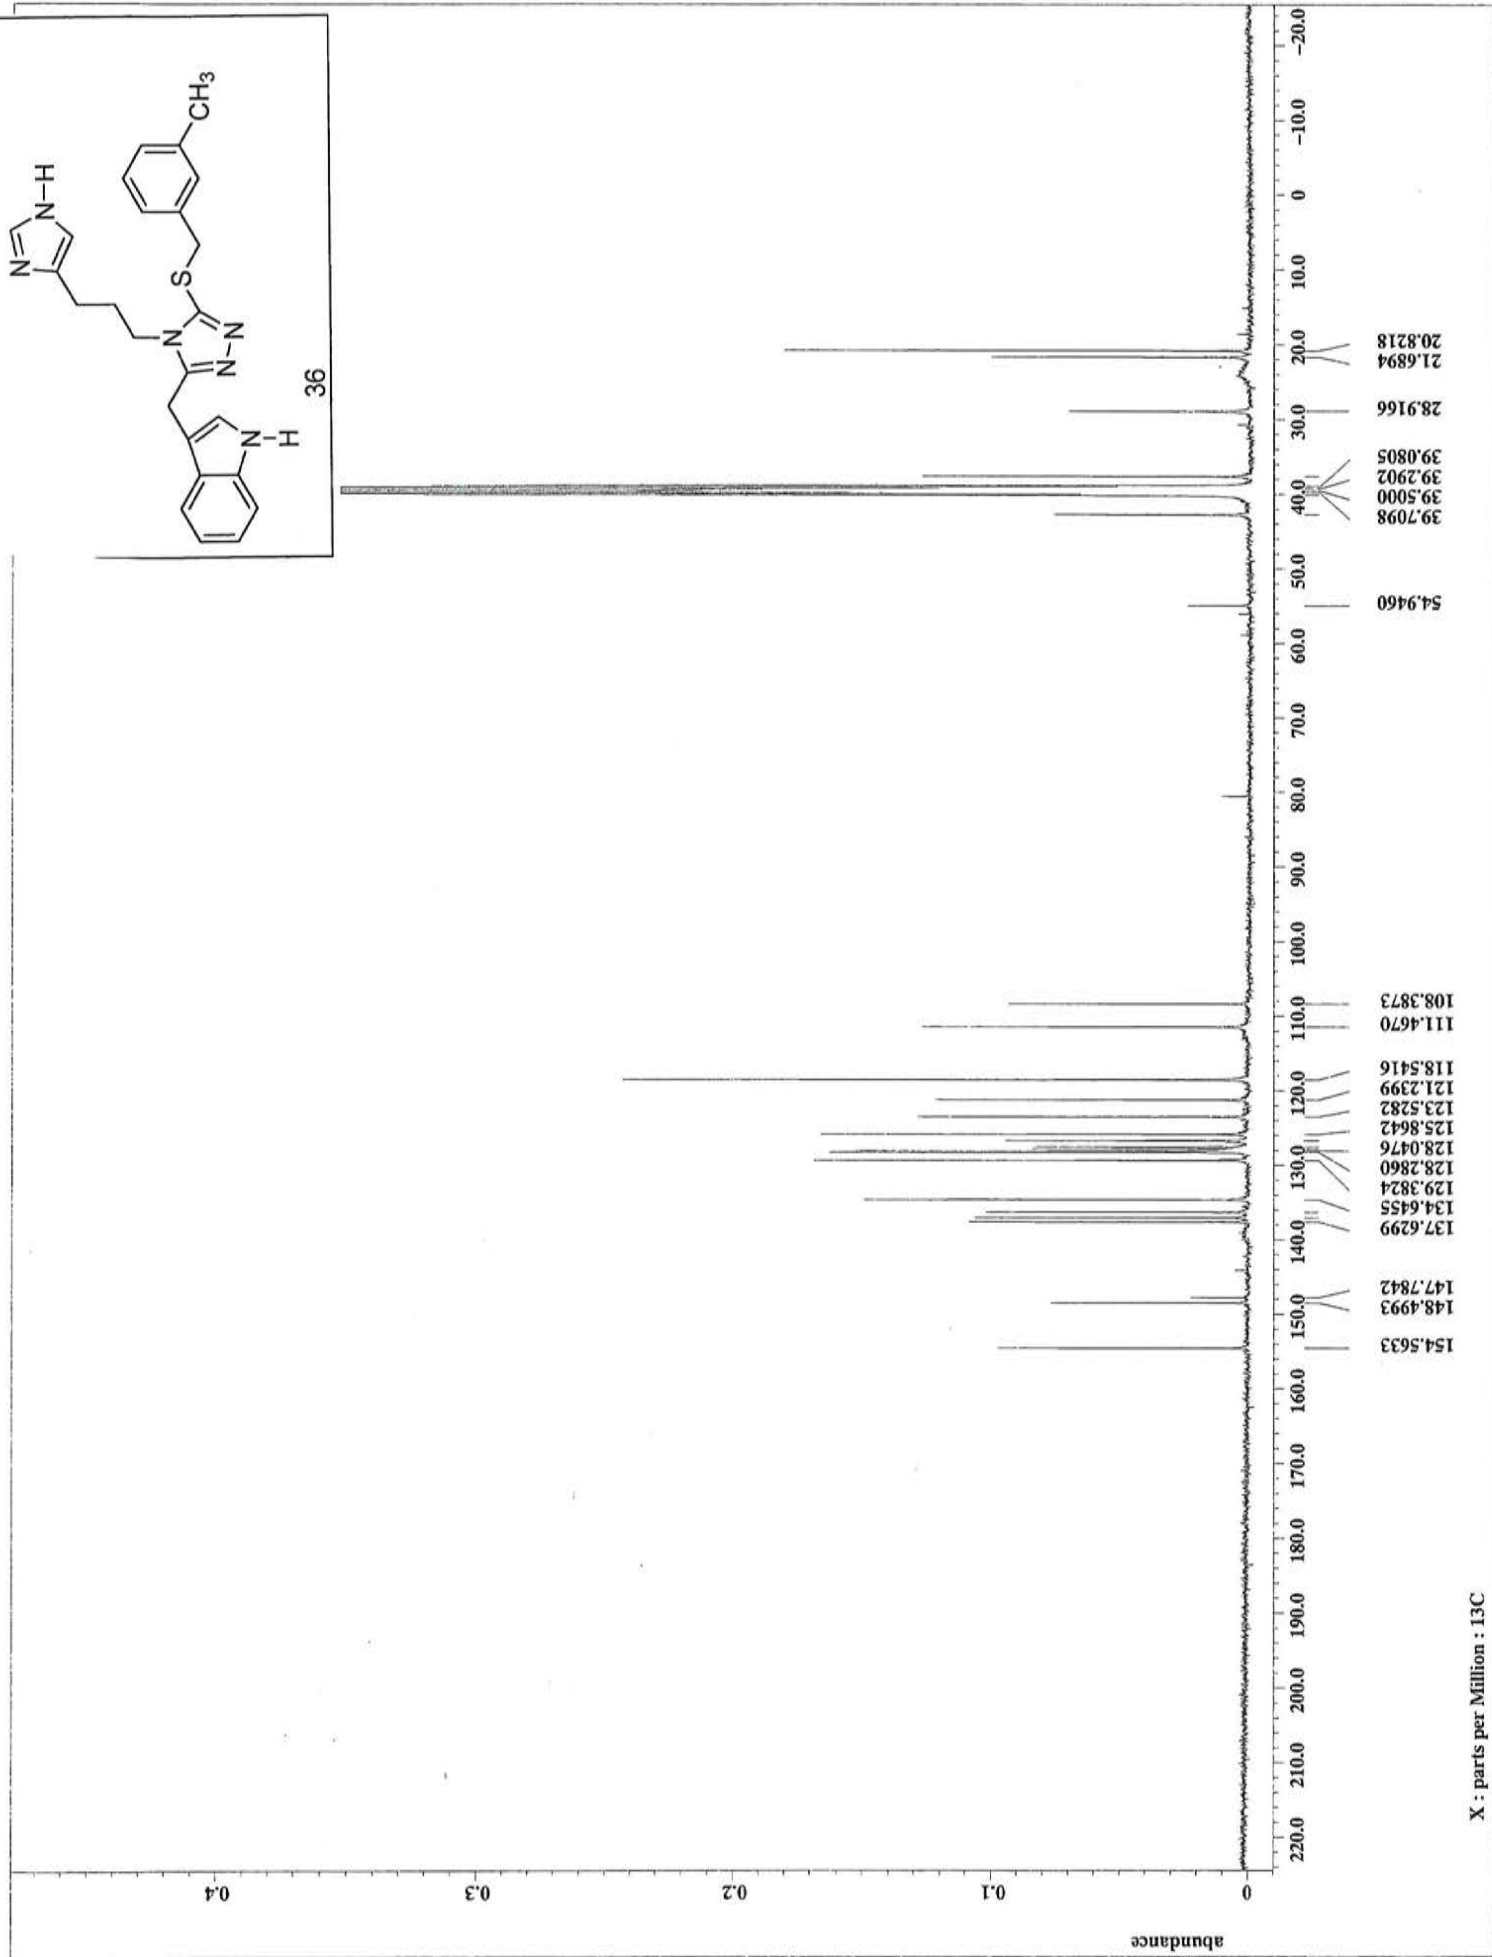

X : parts per Million : 13C

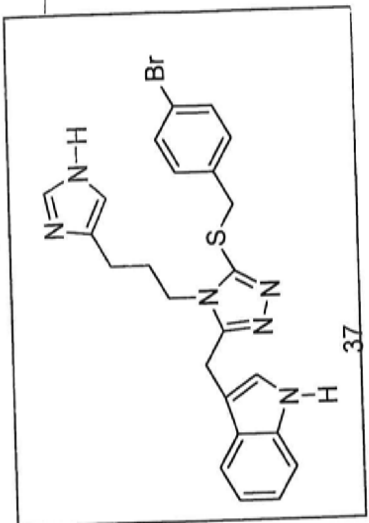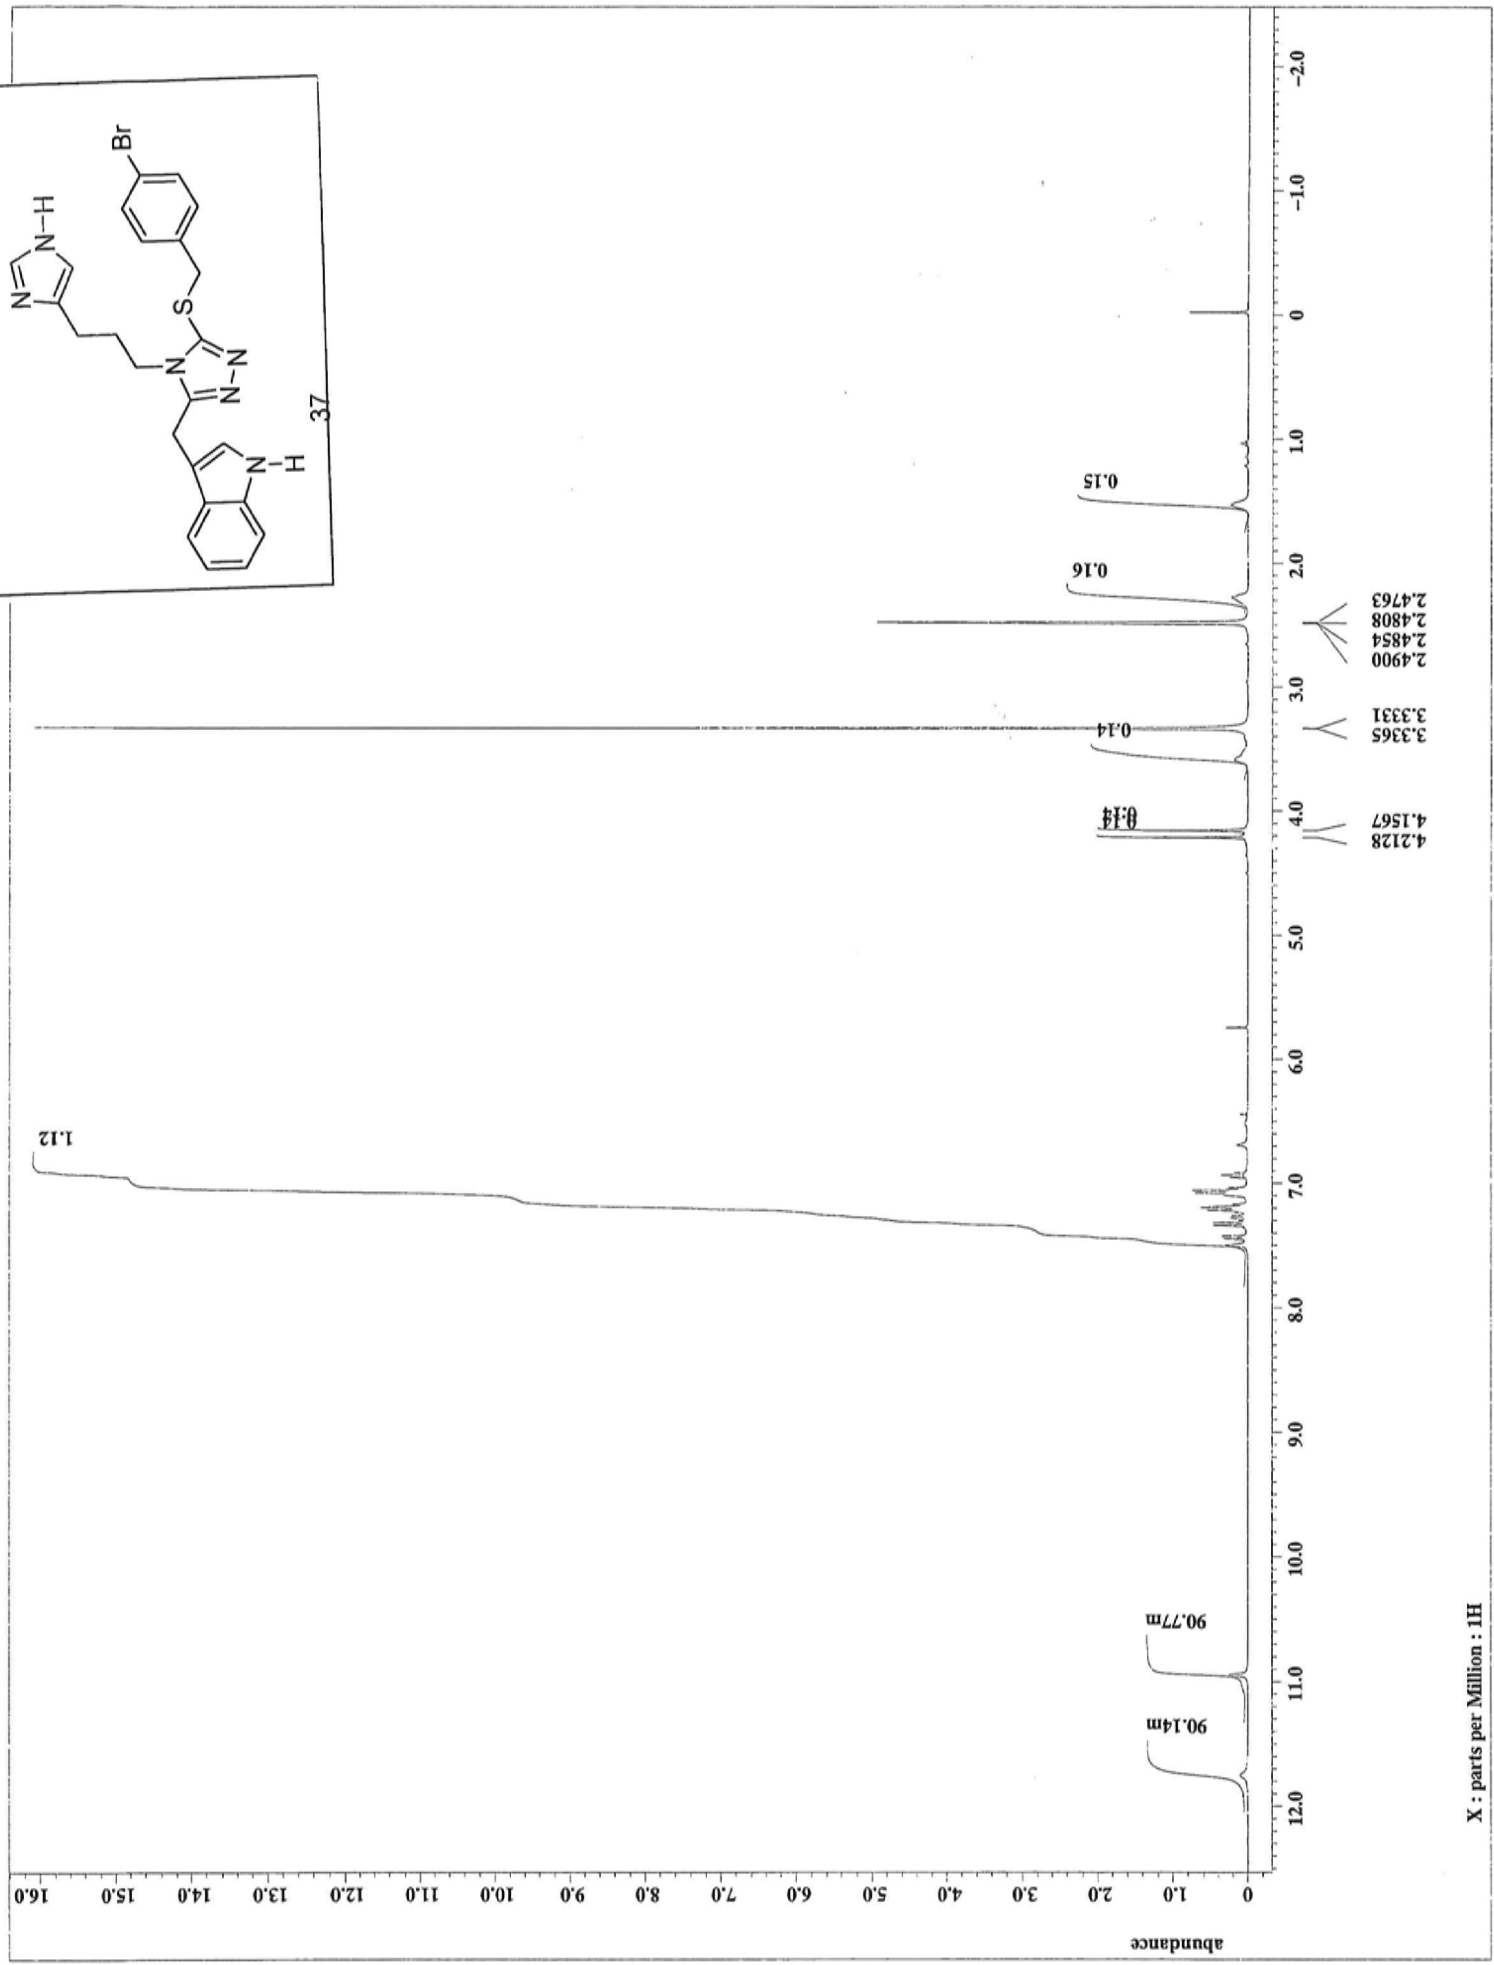

X : parts per Million : 1H

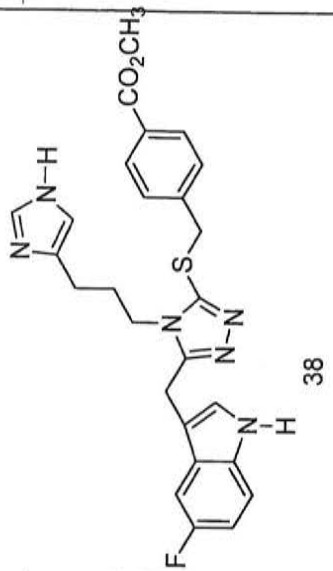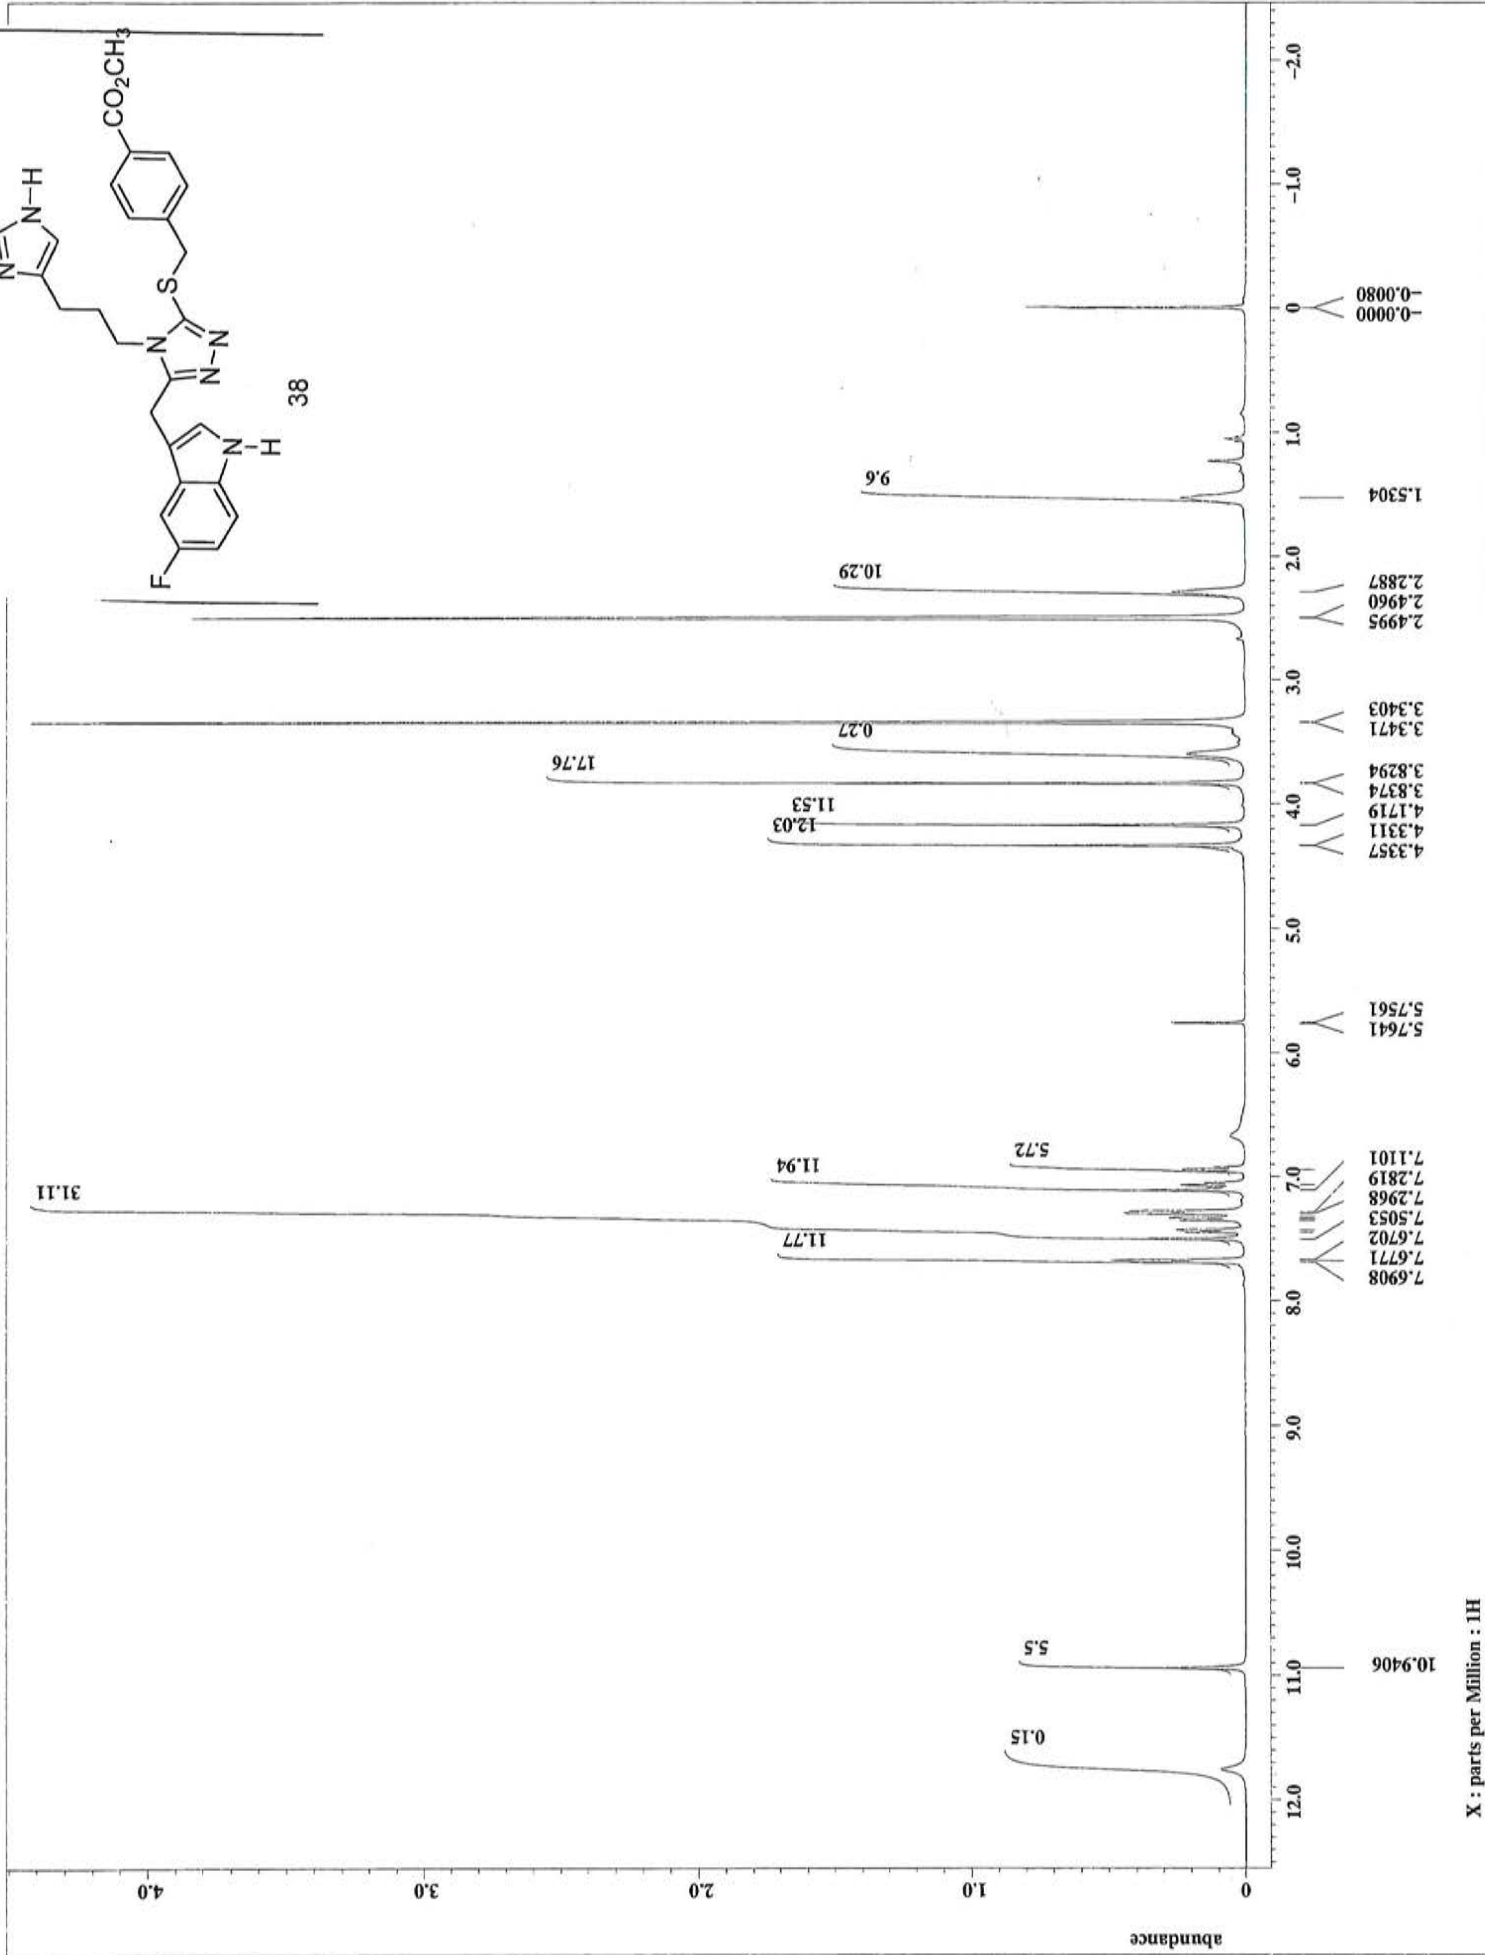

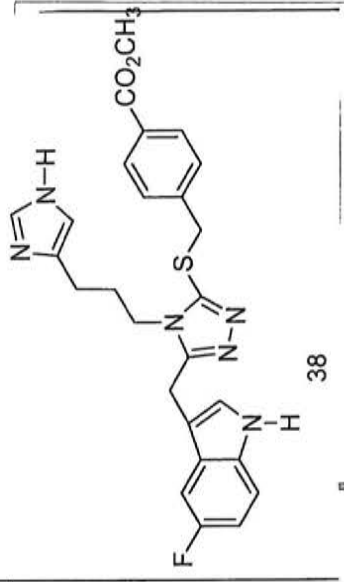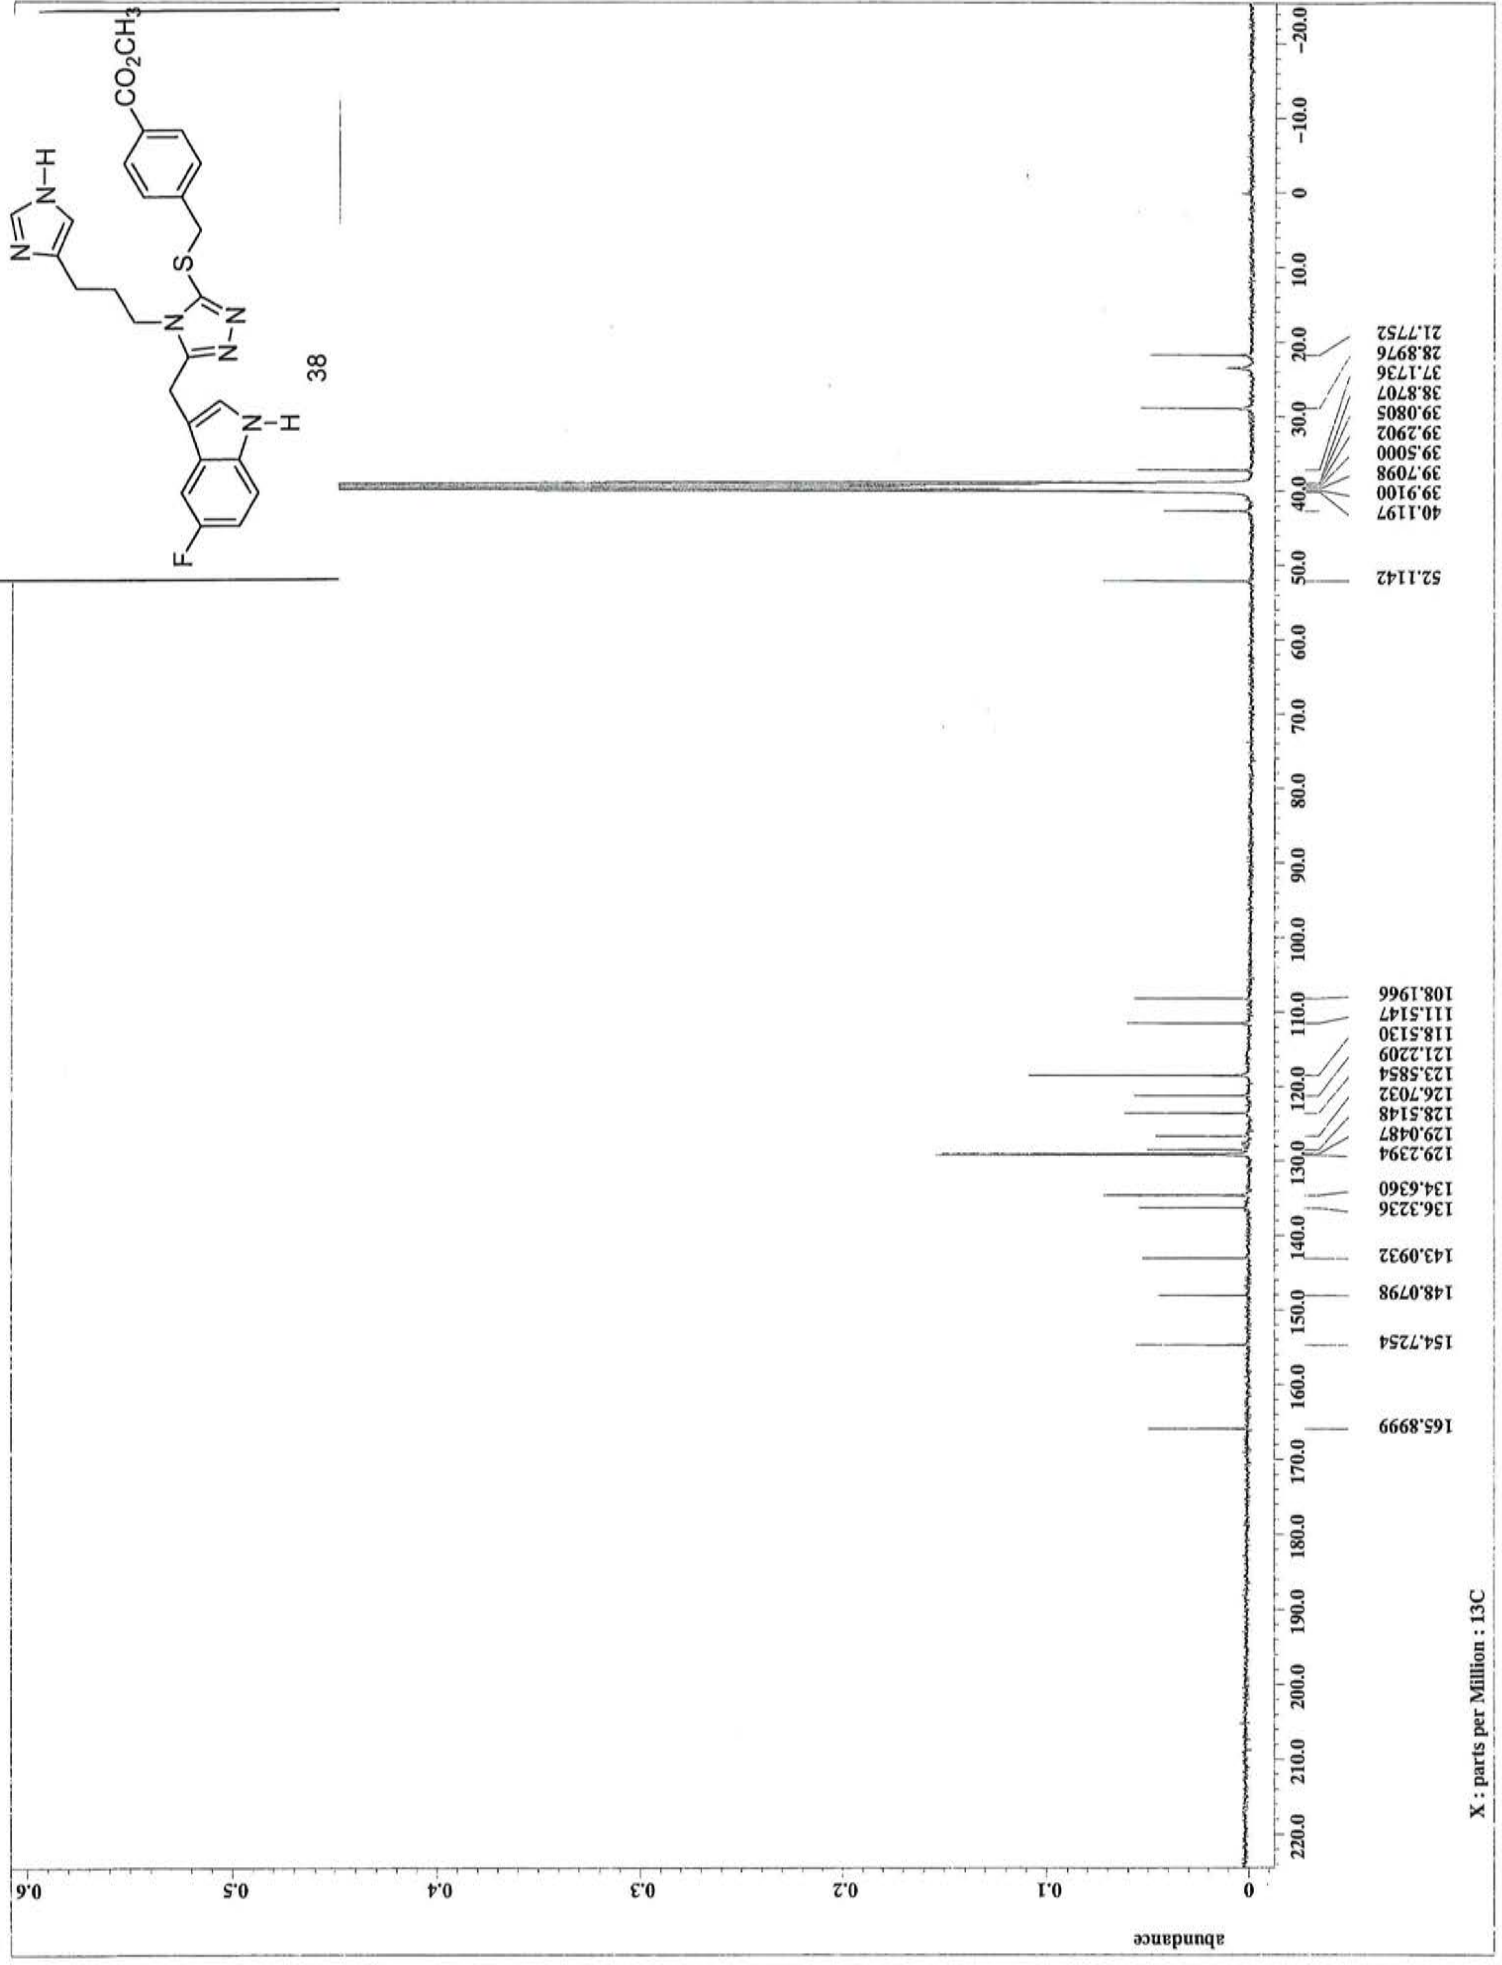

X : parts per Million : 13C

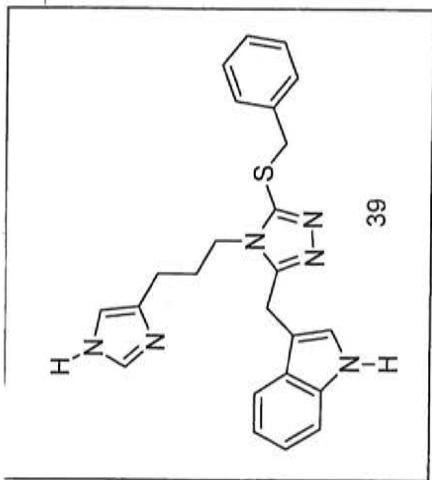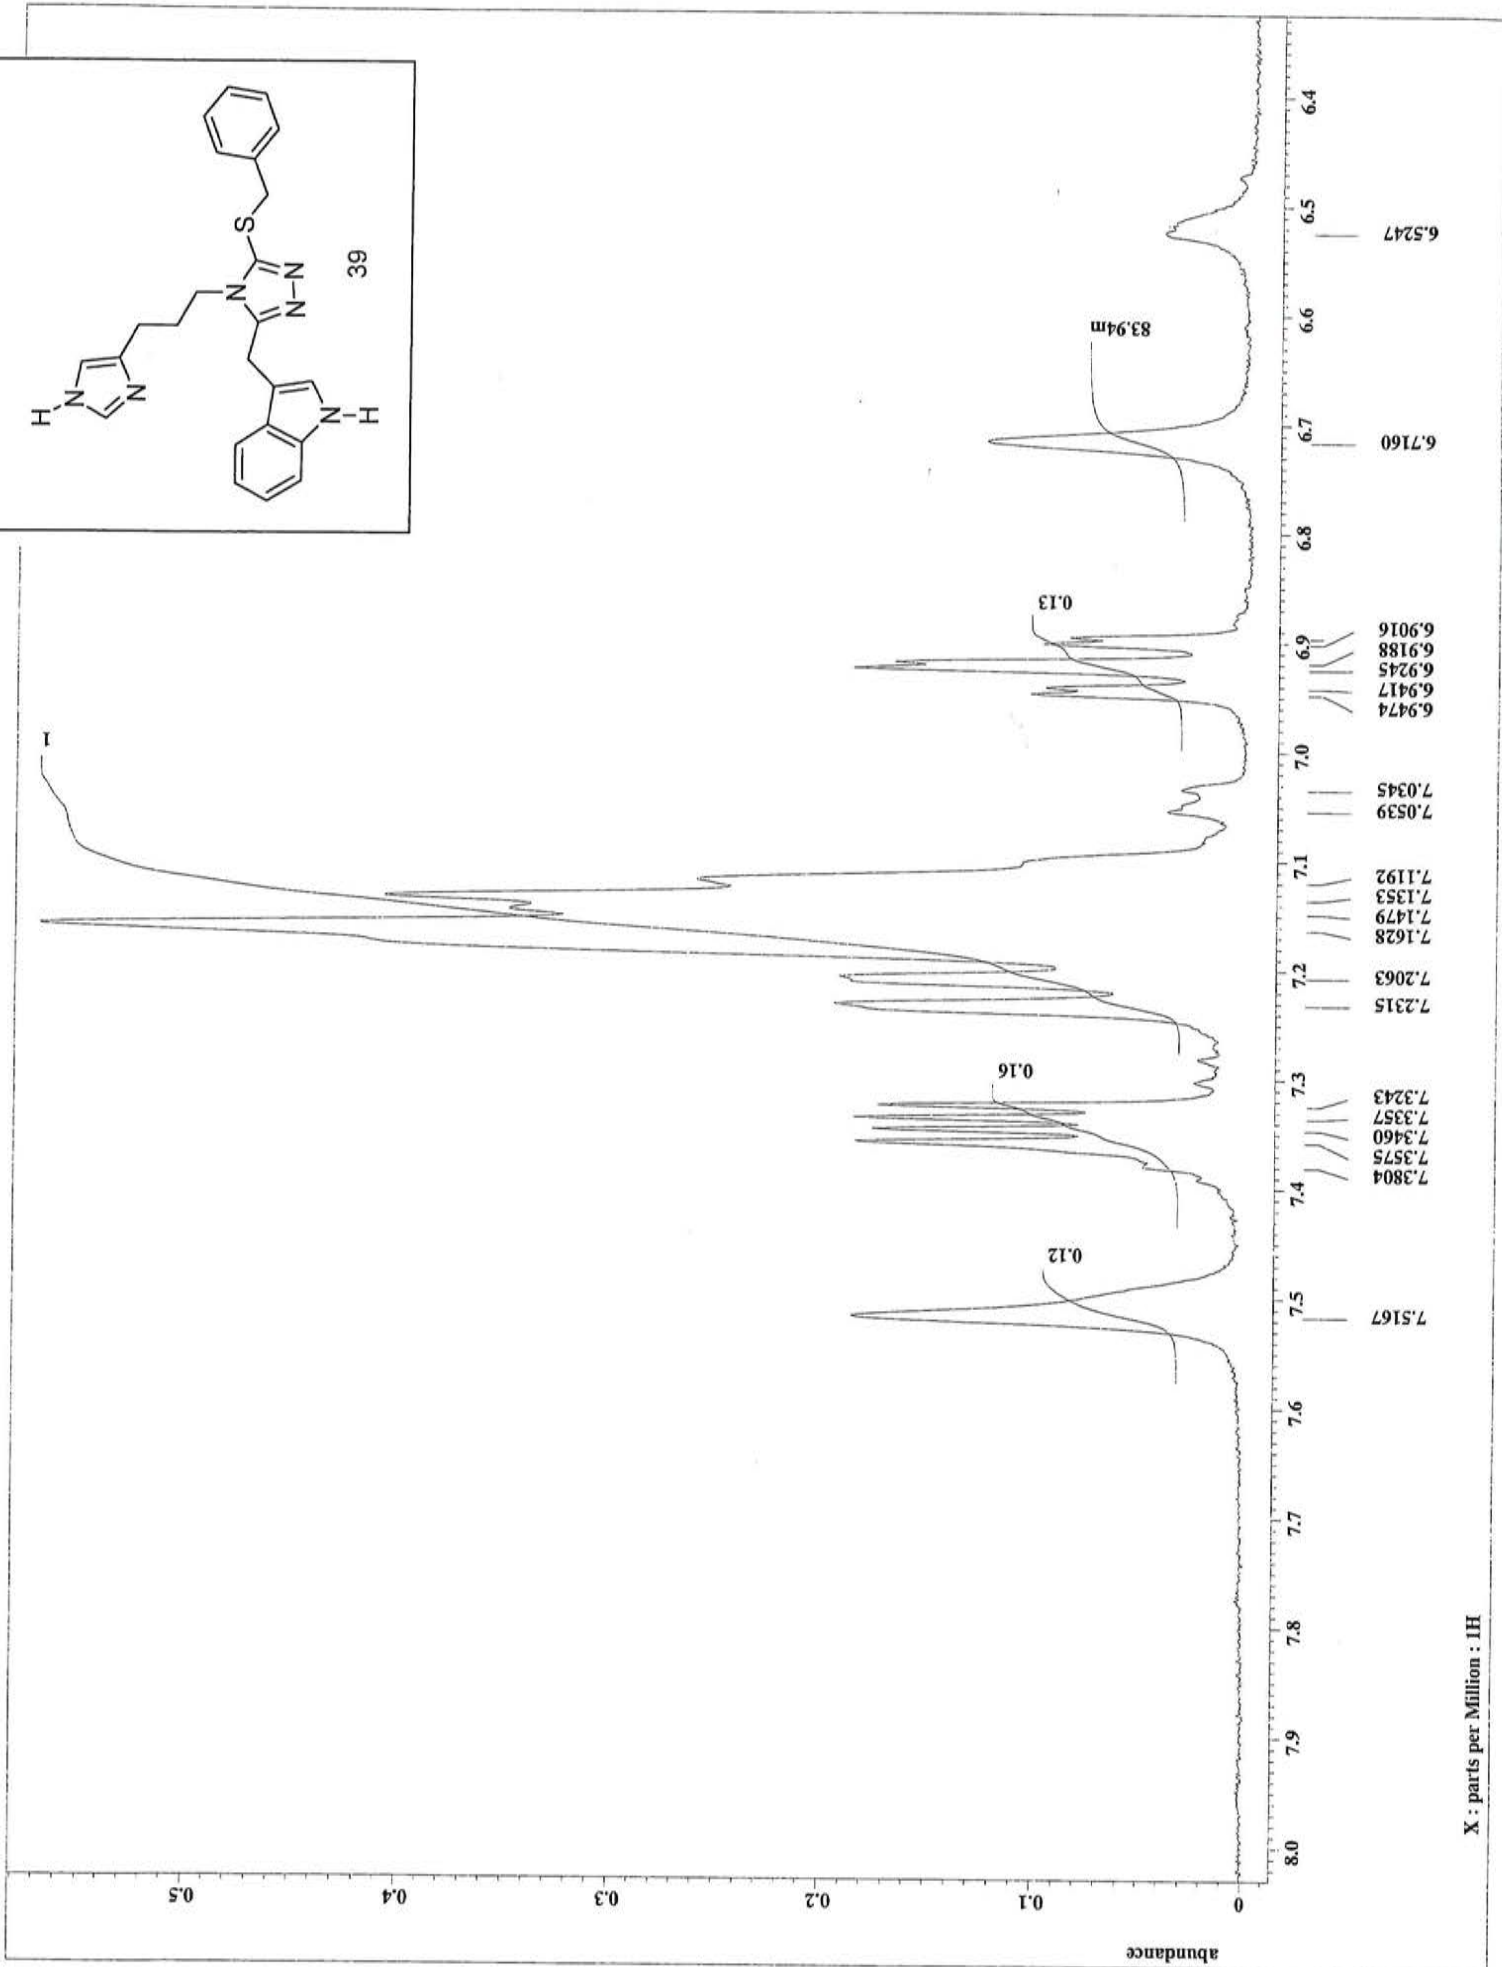

X : parts per Million : 1H

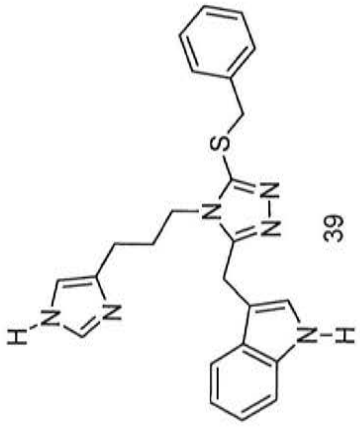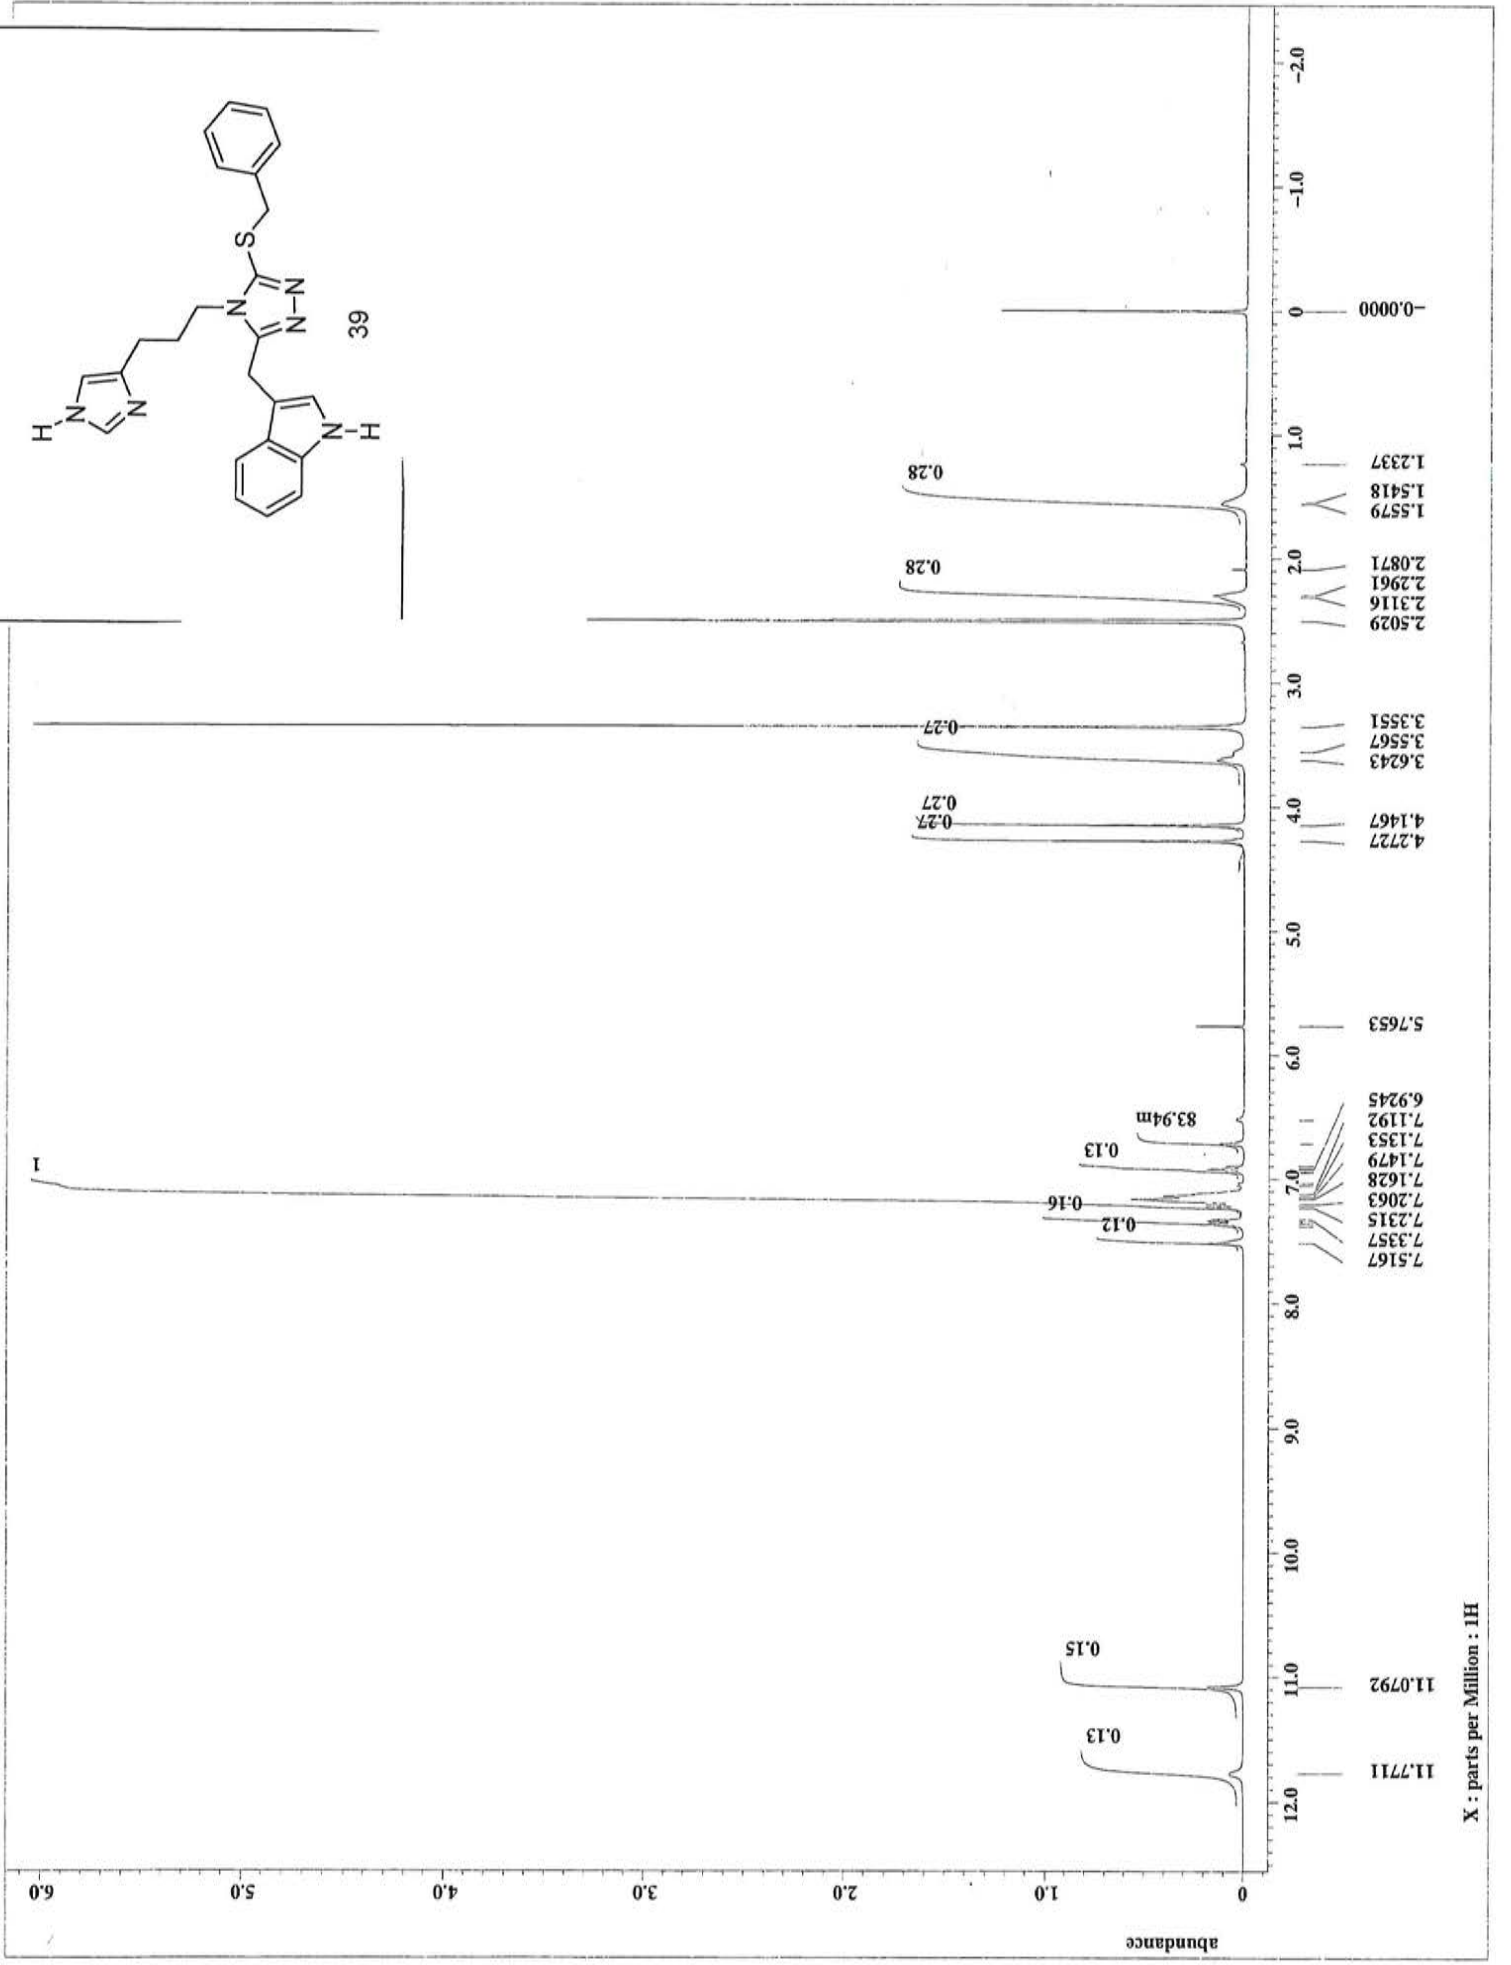

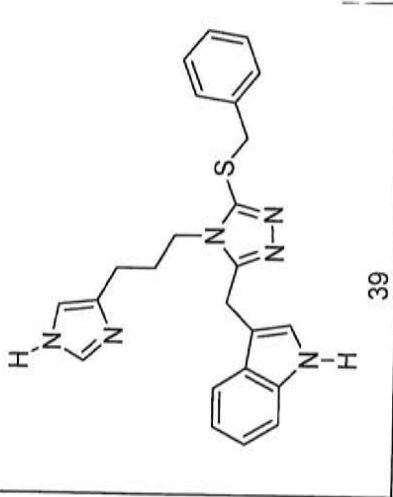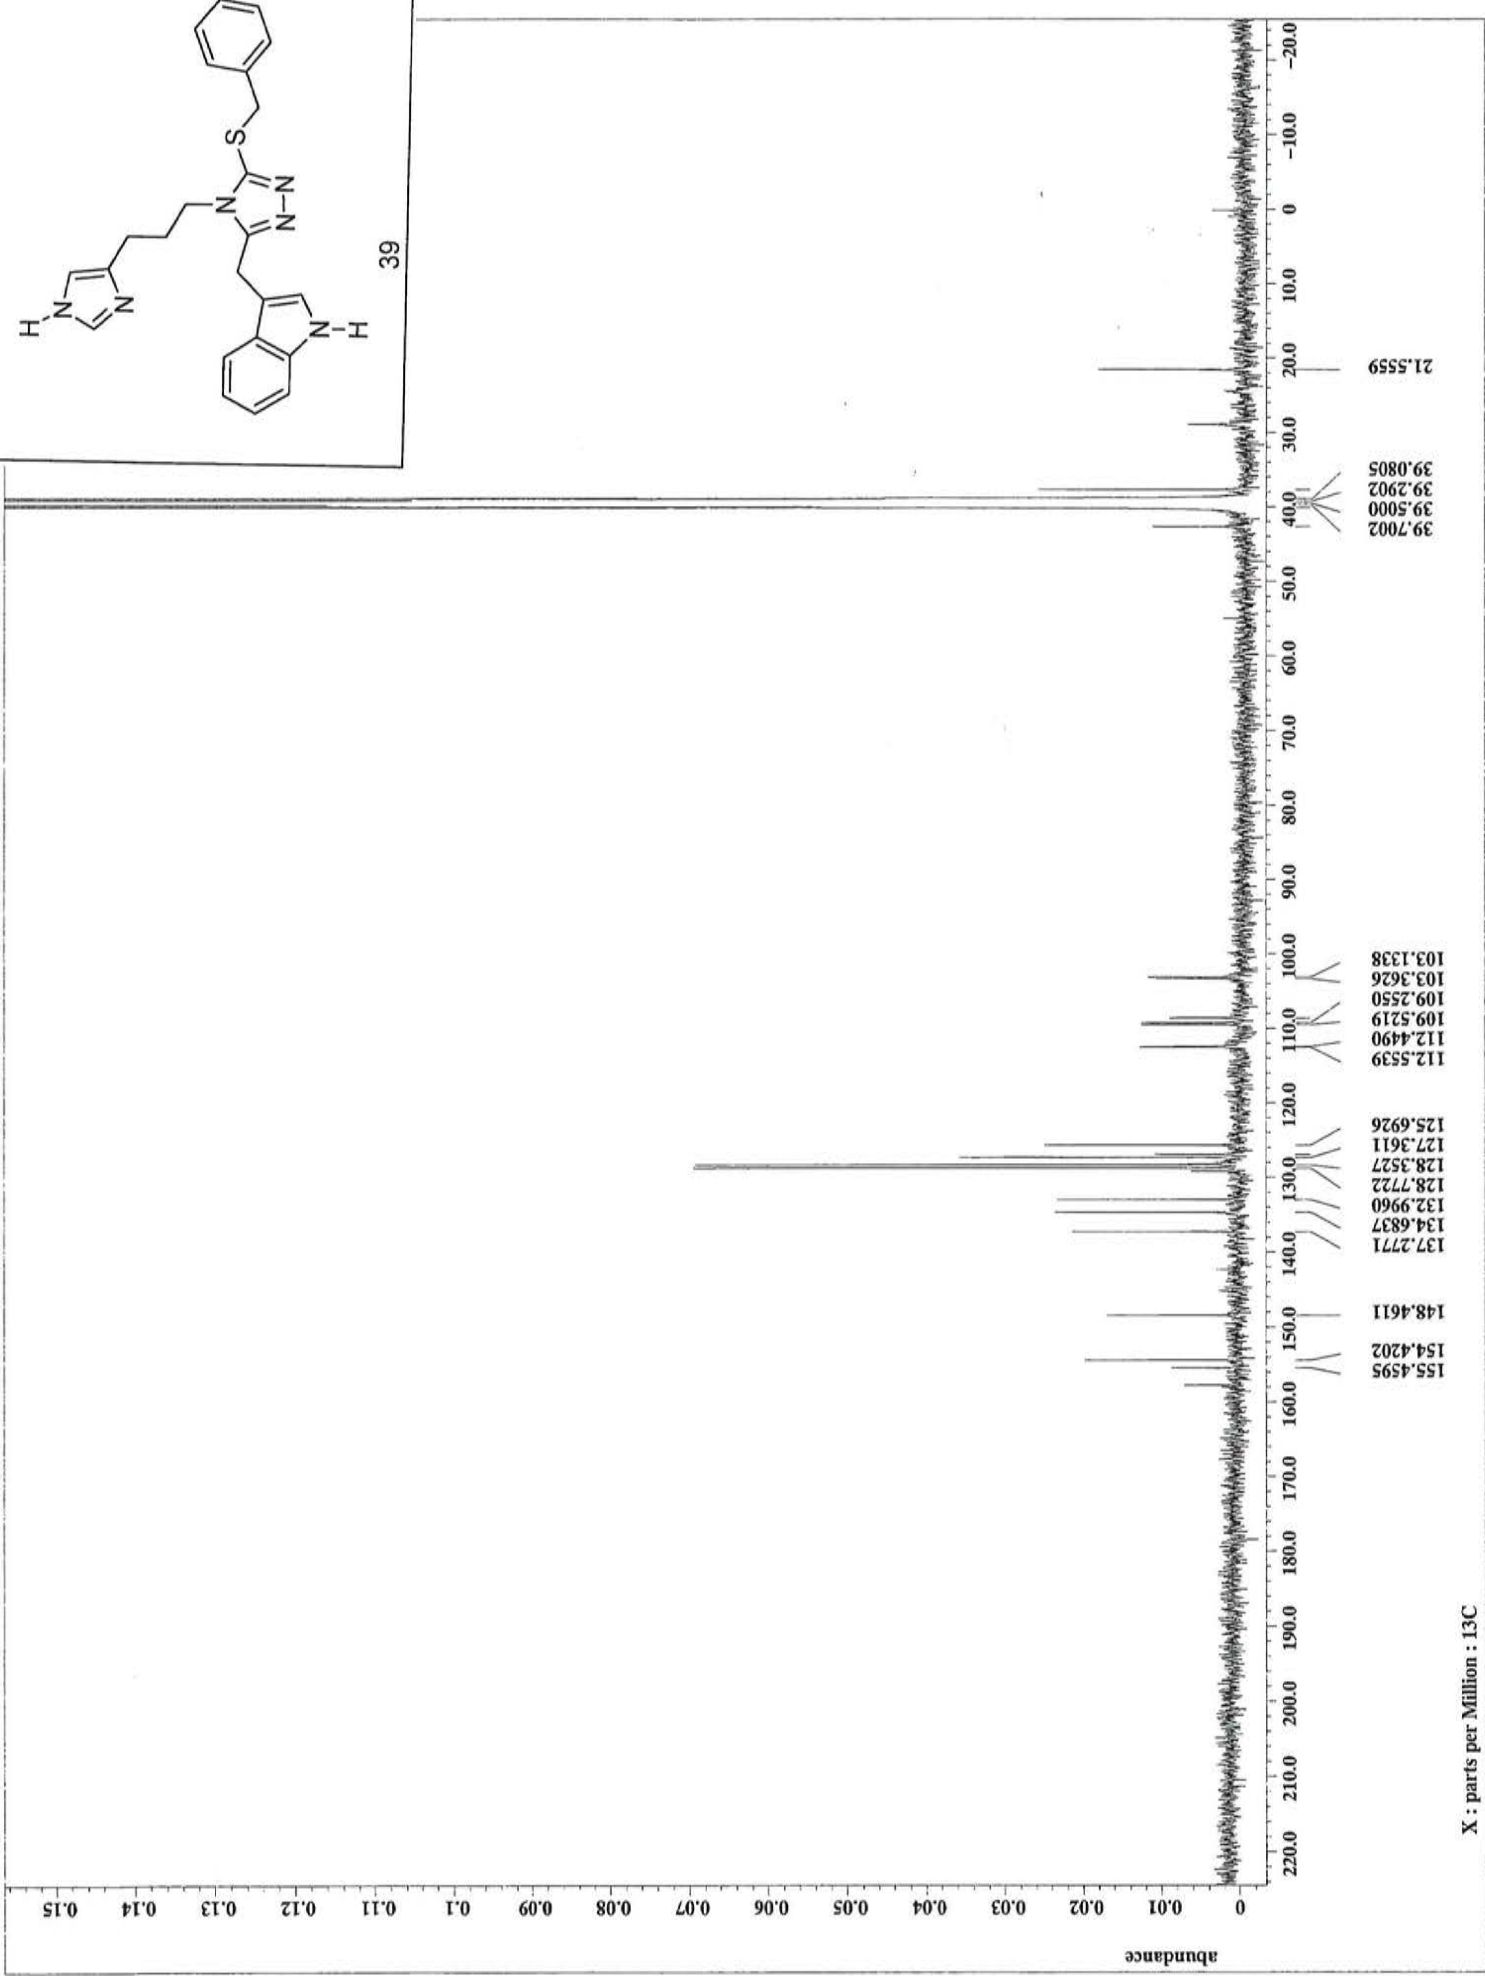

X : parts per Million : 13C

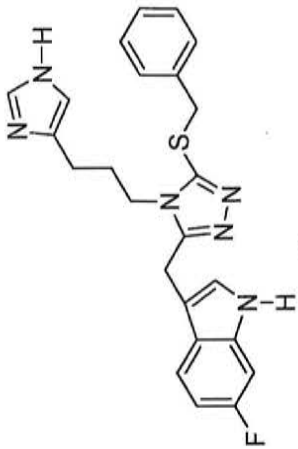

40

NOVA AREA

Dim\_size = 26214  
 Dim\_title = 13C  
 Dim\_units = [ppm]  
 Dimensions = X  
 Site = ECS 400  
 Spectrometer = JNM-ECS400  
 Field\_strength = 9.389766 [T] (400 [MHz])  
 X\_acq\_duration = 1.04333312 [s]  
 X\_domain = 13C  
 X\_freq = 100.52530333 [MHz]  
 X\_offset = 100 [ppm]  
 X\_points = 32768  
 X\_prescans = 4  
 X\_resolution = 0.95846665 [Hz]  
 X\_sweep = 31.40703518 [kHz]  
 Irr\_domain = 1H  
 Irr\_freq = 399.78219838 [MHz]  
 Irr\_offset = 5 [ppm]  
 Clipped = FALSE  
 Mod\_return = 1  
 Scans = 12000  
 Total\_scans = 12000  
 X\_90\_width = 12.84 [us]  
 X\_acq\_time = 1.04333312 [s]  
 X\_angle = 30 [deg]  
 X\_atn = 9 [dB]  
 X\_pulse = 4.28 [us]  
 Irr\_atn\_dec = 27 [dB]  
 Irr\_atn\_noe = 27 [dB]  
 Irr\_noise = WALTZ  
 Decoupling = TRUE  
 Initial\_wait = 1 [s]  
 Nce = TRUE  
 Noe\_time = 2 [s]  
 Recvr\_gain = 60  
 Relaxation\_delay = 2 [s]  
 Repetition\_time = 3.04333312 [s]  
 Temp\_get = 19.5 [dC]

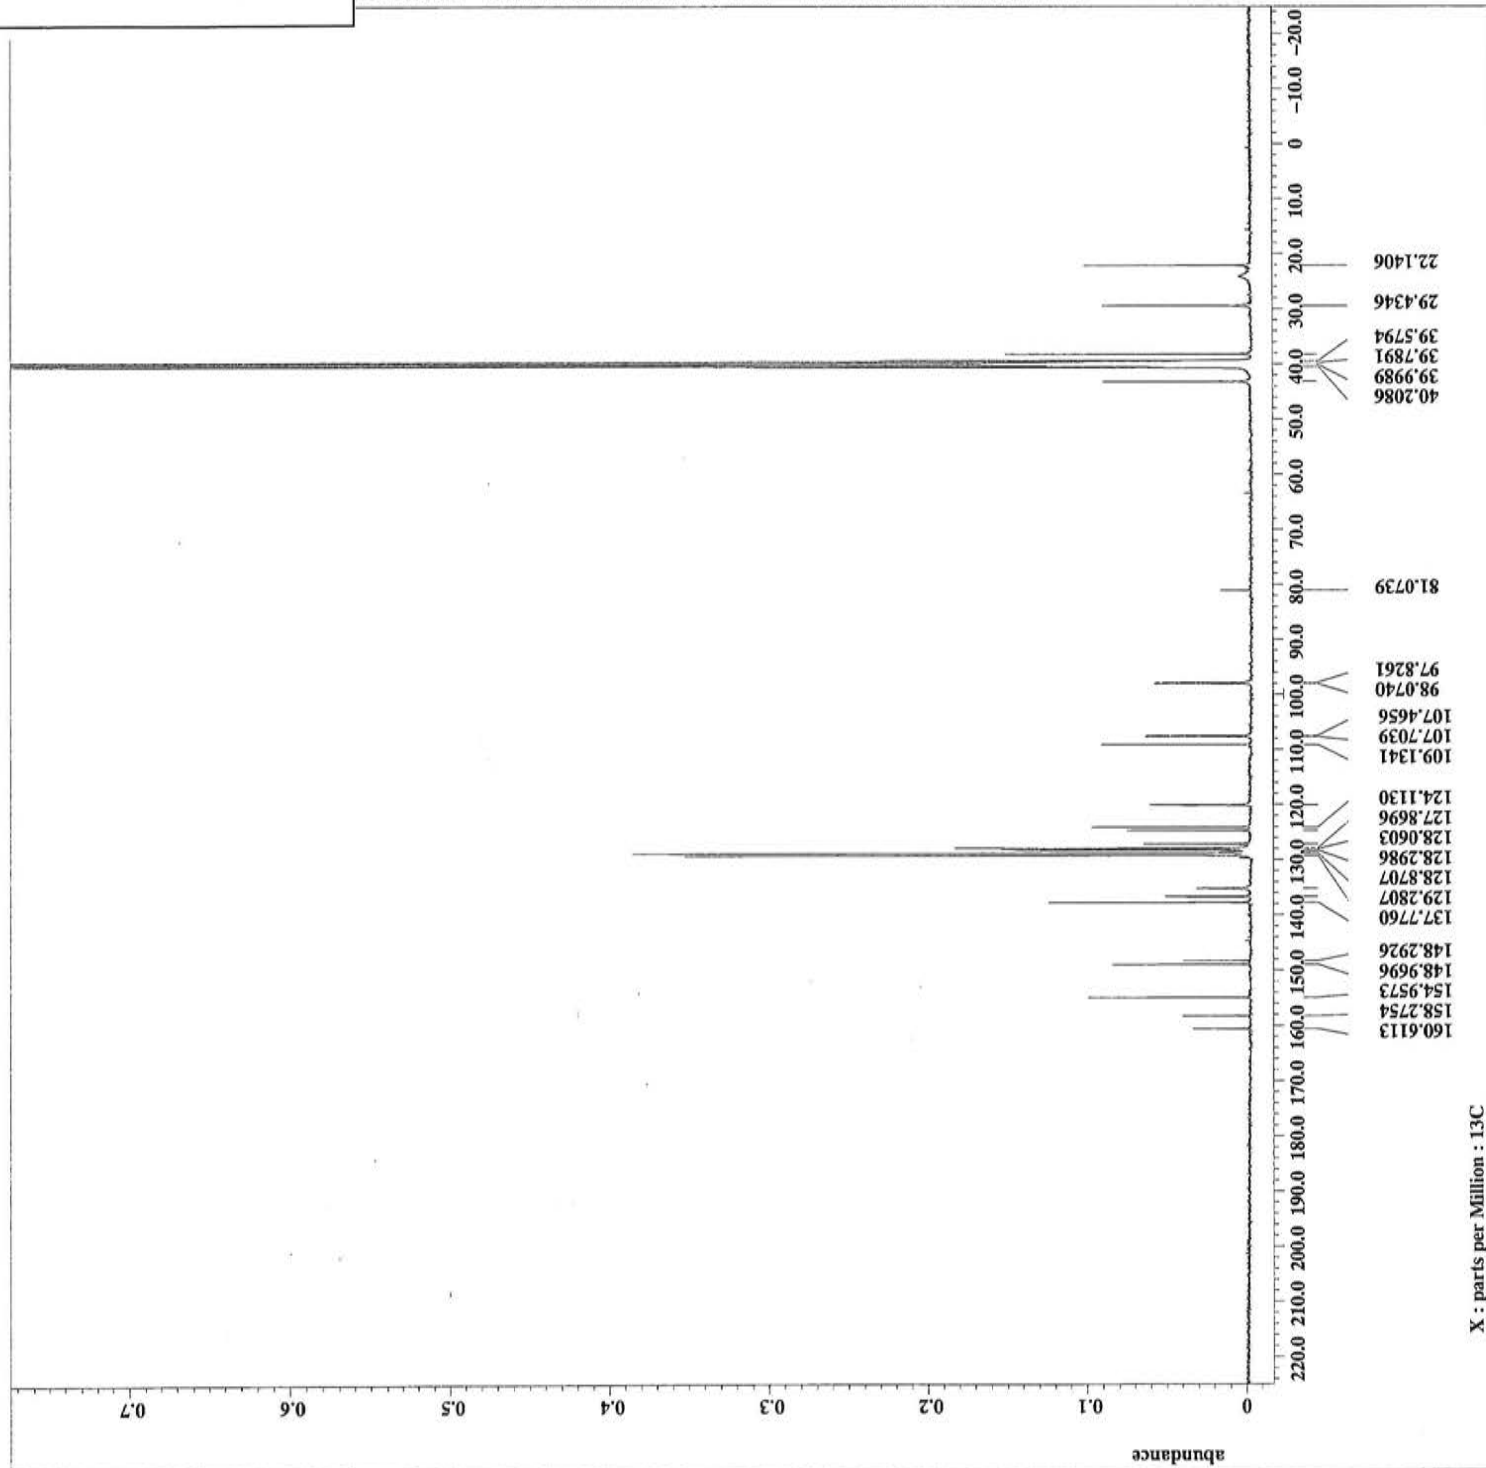

X : parts per Million : 13C



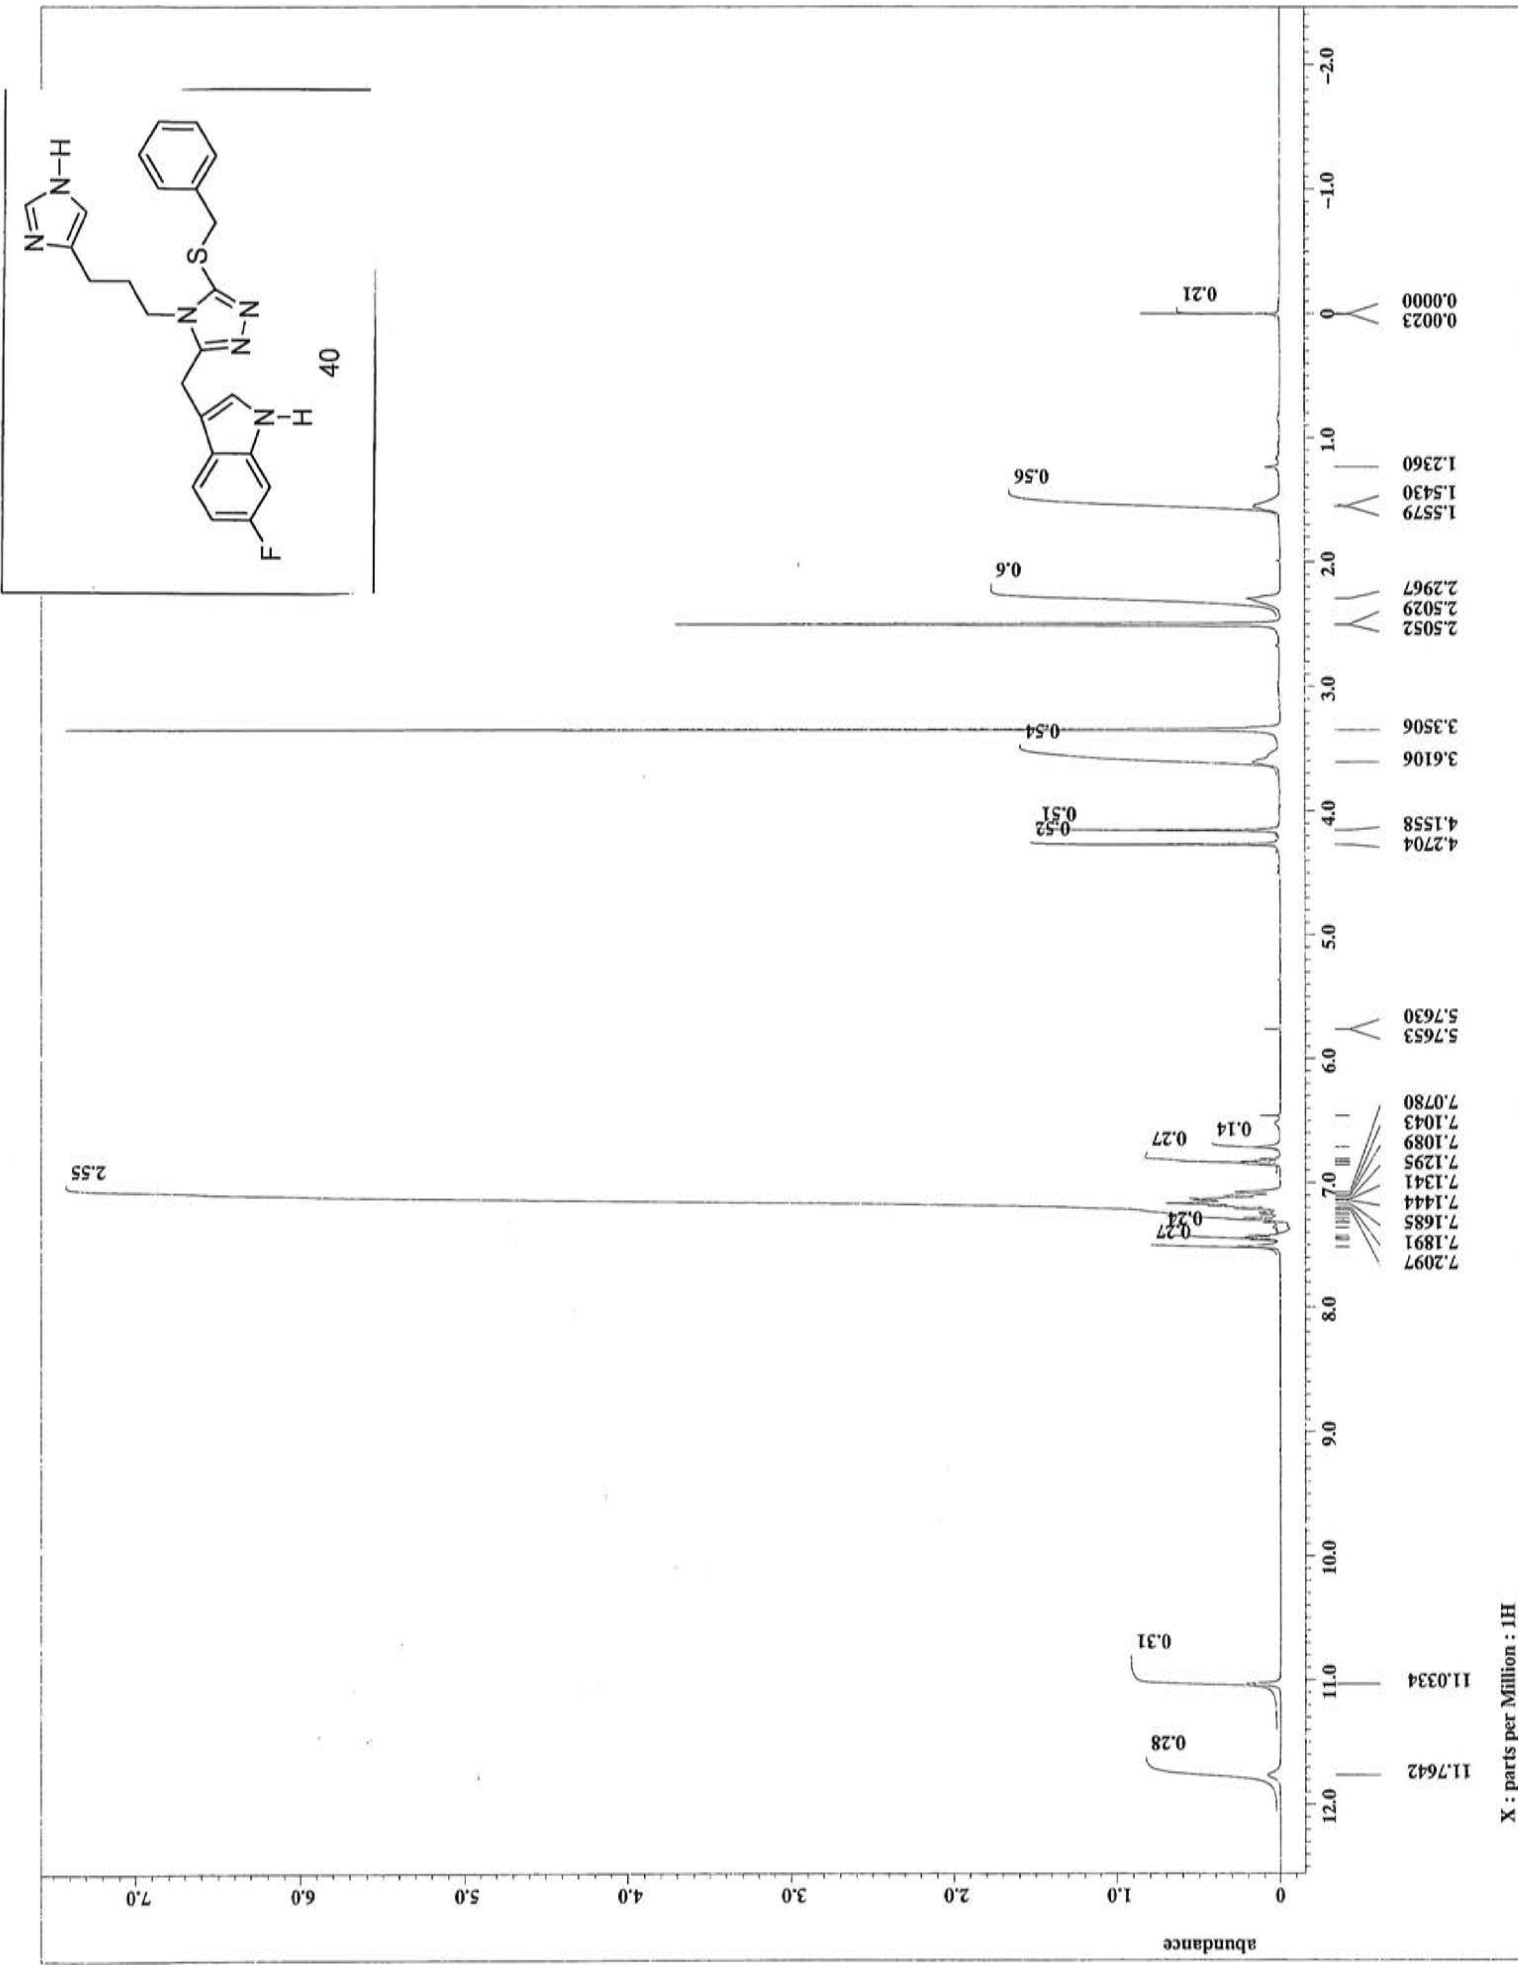

X : parts per Million : 1H

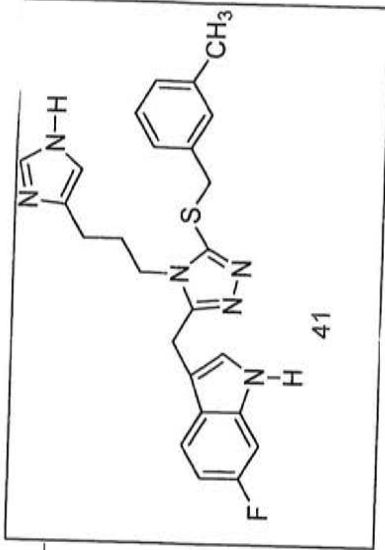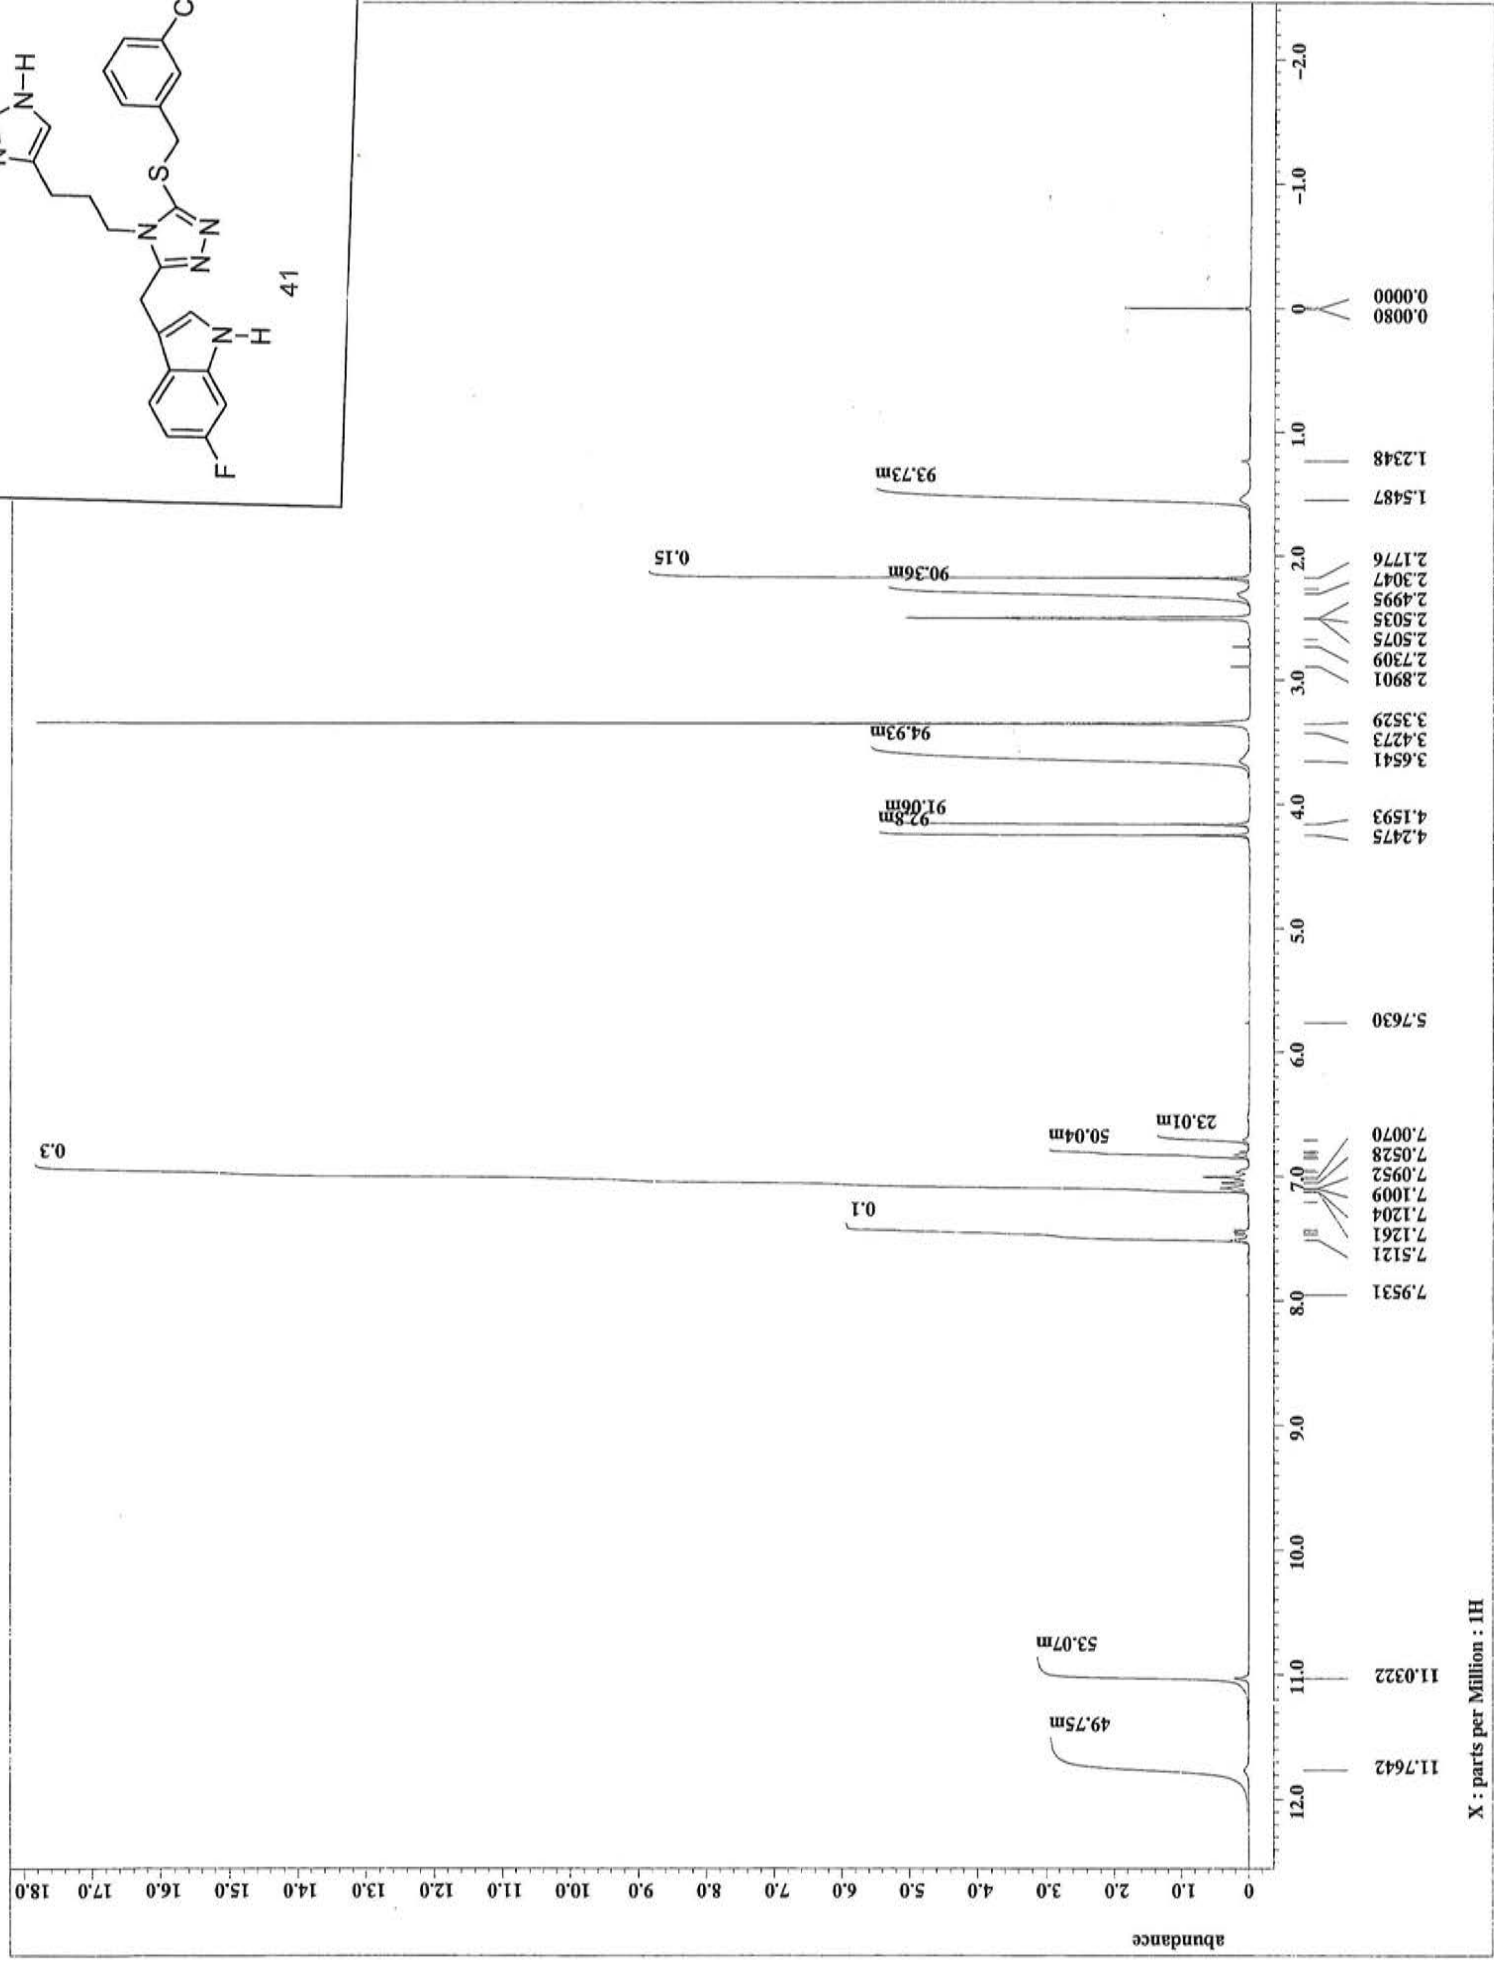

X : parts per Million : 1H

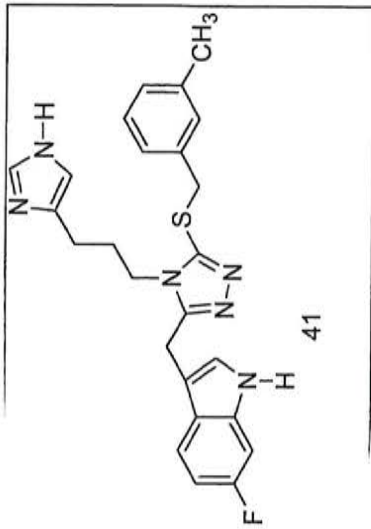

0.4

0.3

0.2

0.1

0

abundance

220.0 210.0 200.0 190.0 180.0 170.0 160.0 150.0 140.0 130.0 120.0 110.0 100.0 90.0 80.0 70.0 60.0 50.0 40.0 30.0 20.0 10.0 0 -10.0 -20.0

- 21.6227
- 20.8599
- 38.8707
- 39.0805
- 39.2902
- 39.5000
- 39.7002
- 39.9100
- 40.1197
- 97.6228
- 97.3653
- 107.0429
- 107.2813
- 108.7306
- 123.6522
- 125.9119
- 127.6281
- 128.1239
- 128.3336
- 129.4301
- 134.7504
- 137.1055
- 137.7061
- 148.6518
- 154.4965
- 157.8336
- 160.1601

X : parts per Million : 13C

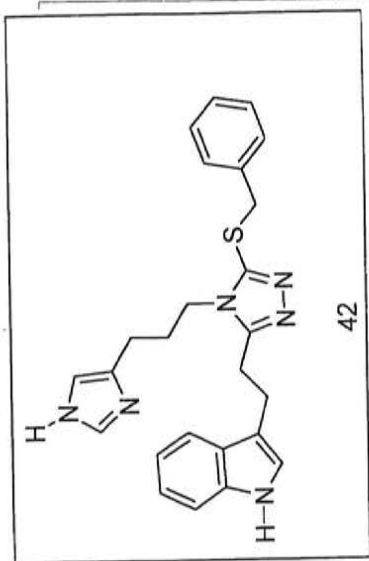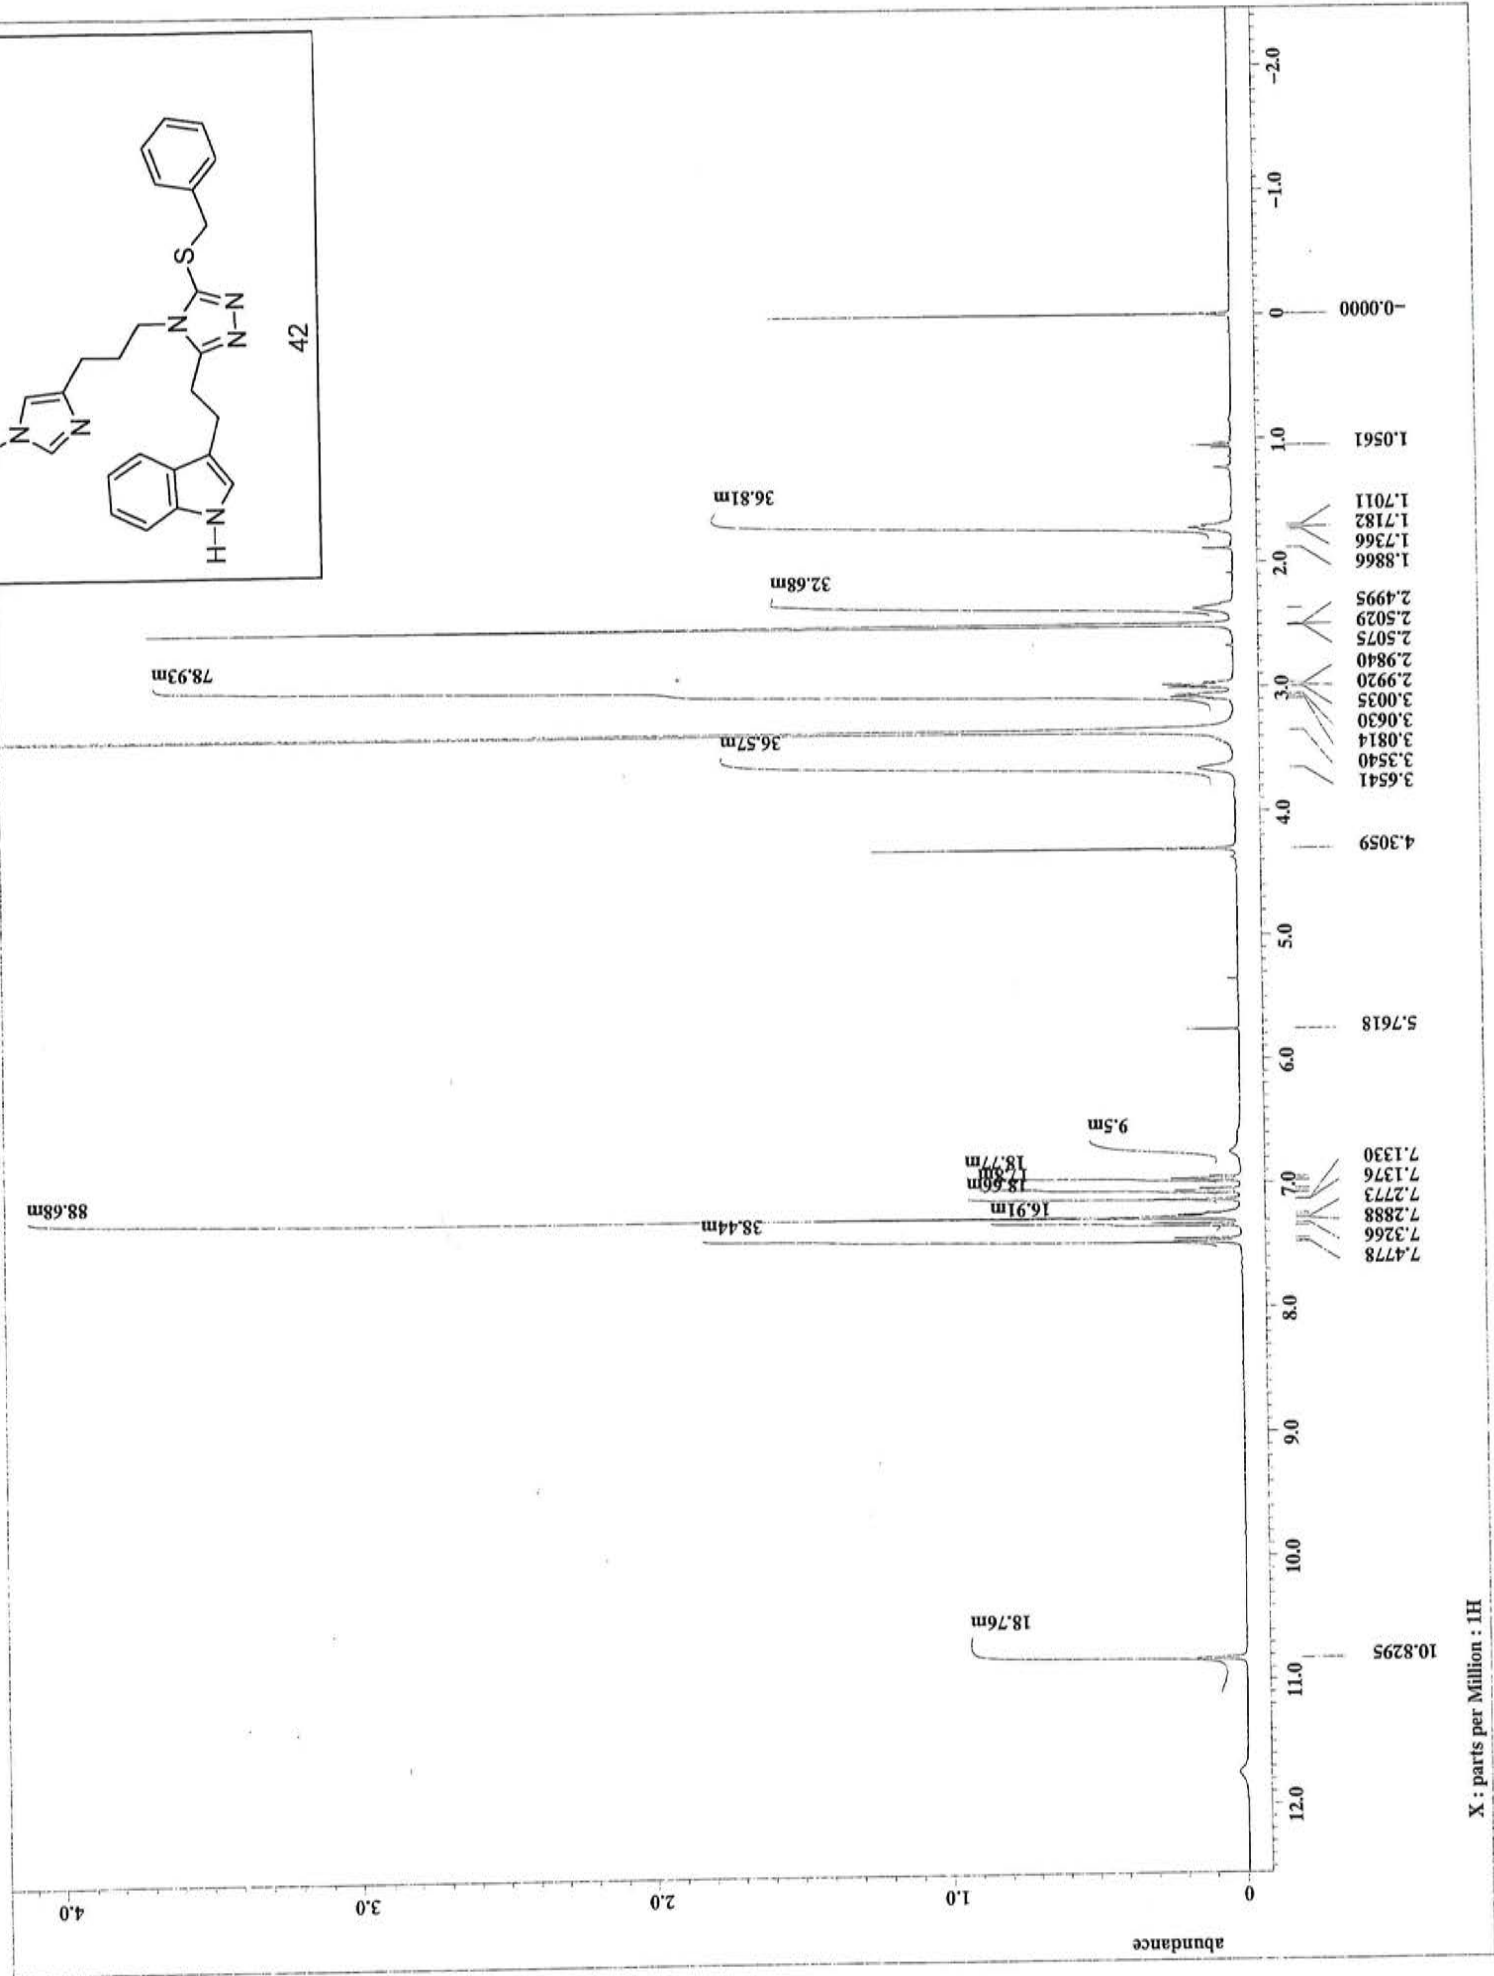

X : parts per Million : 1H

X : parts per Million : 1H

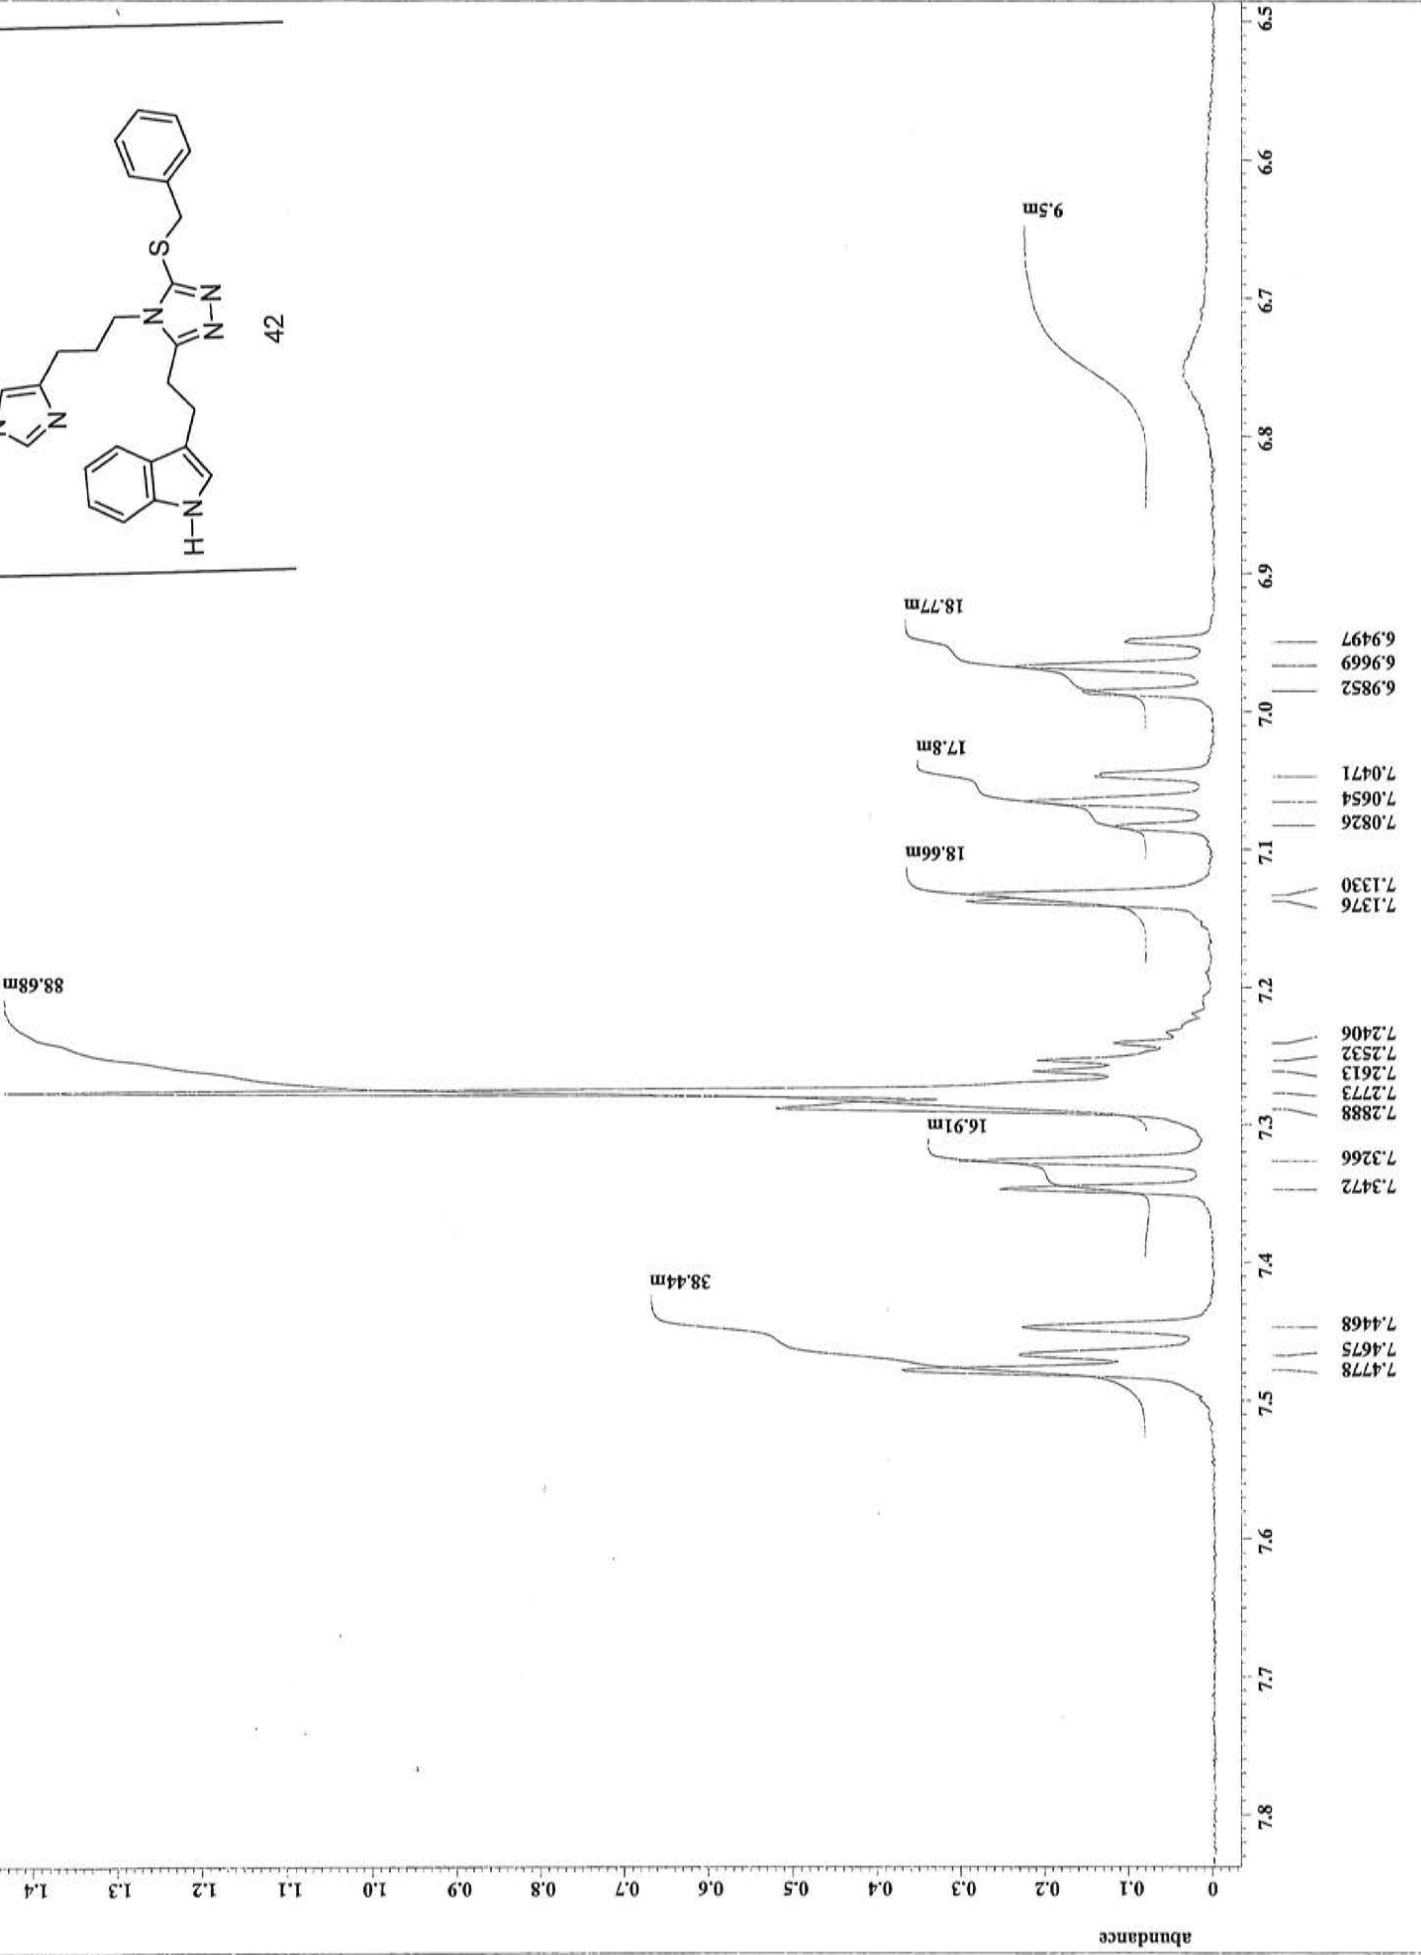

42

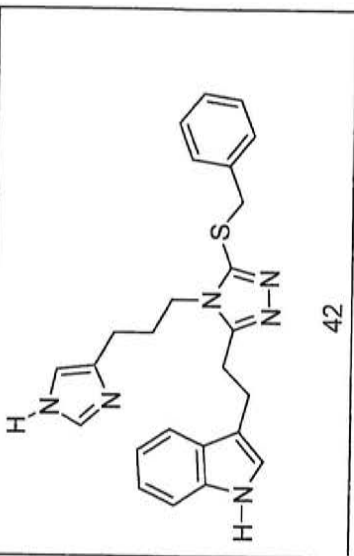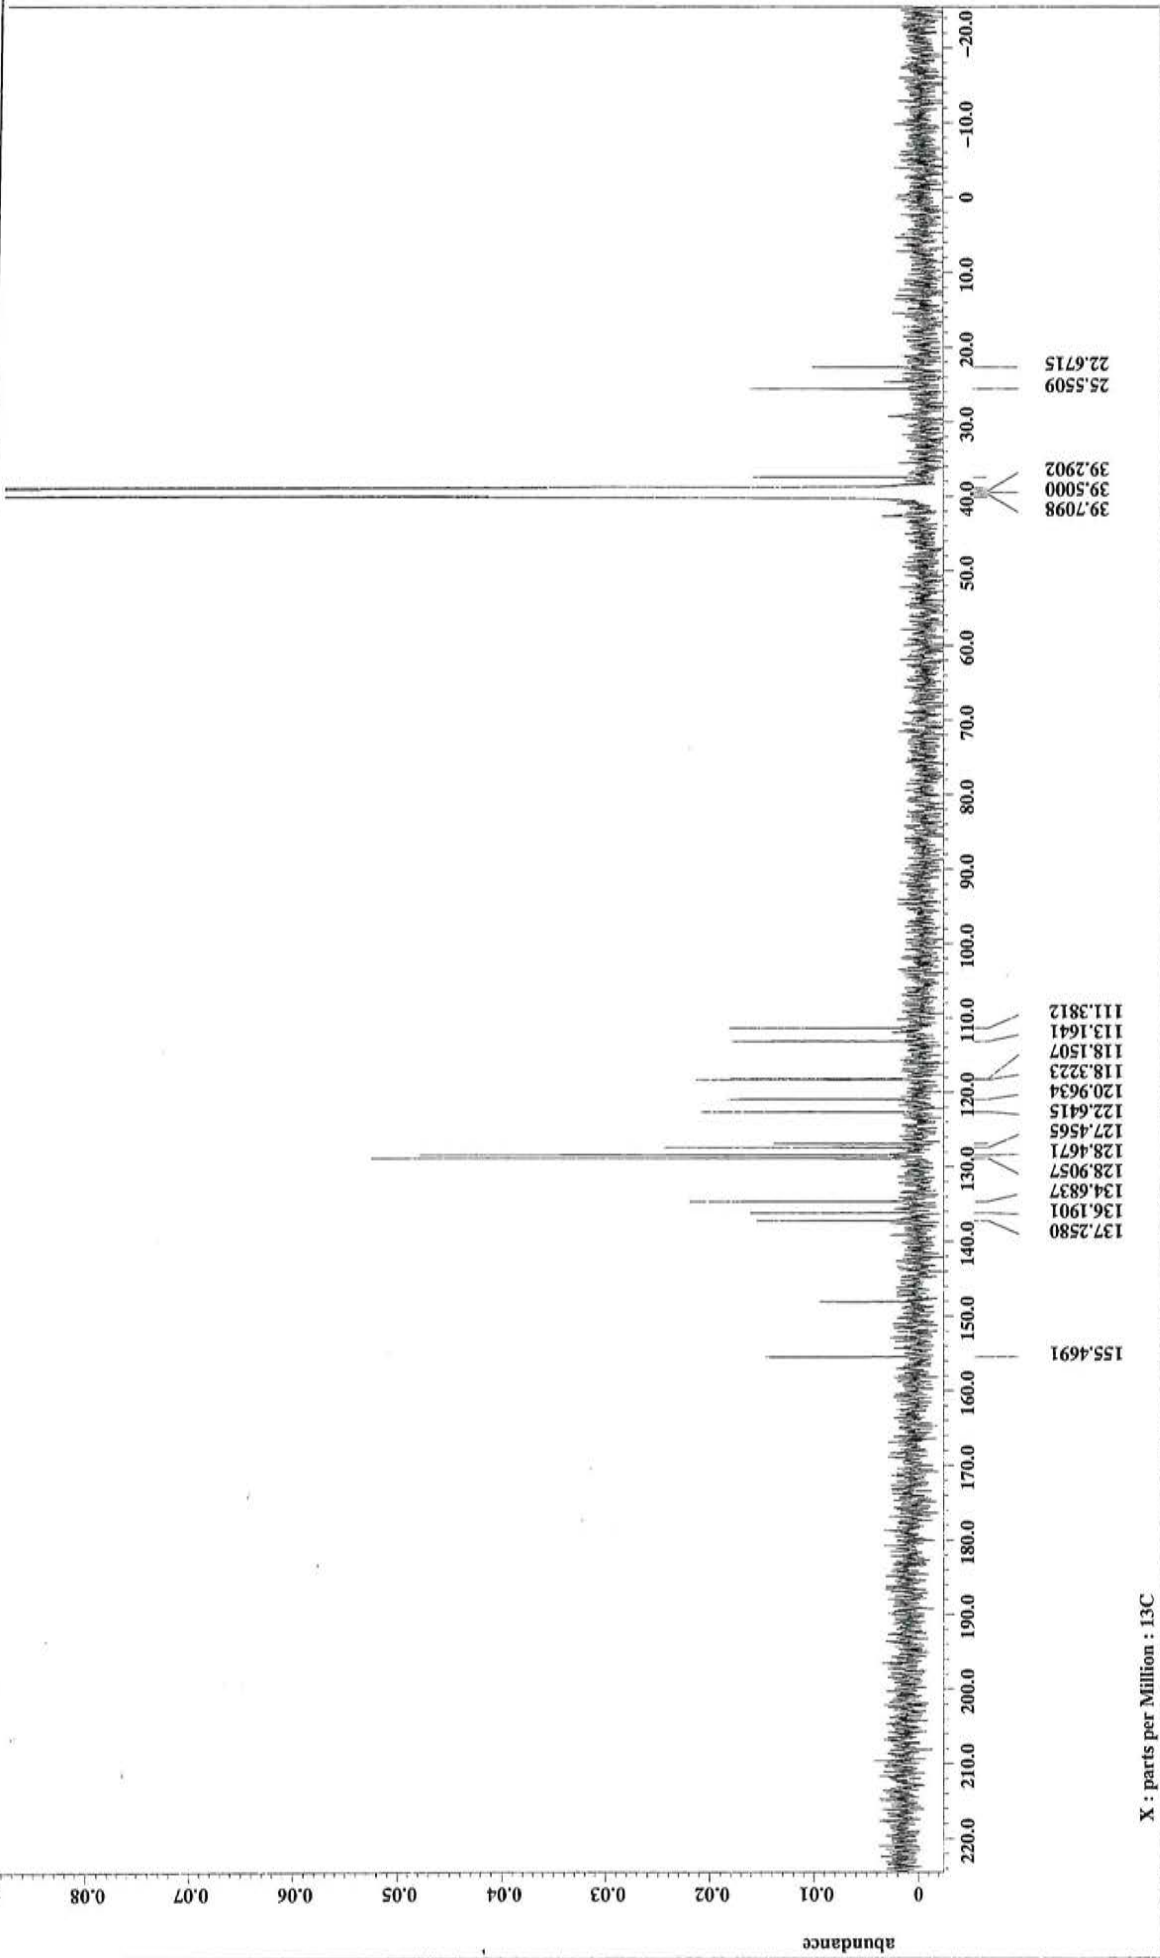

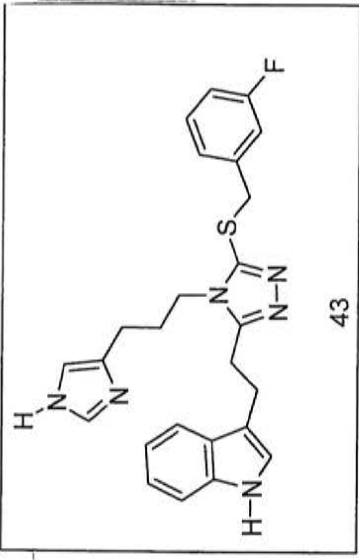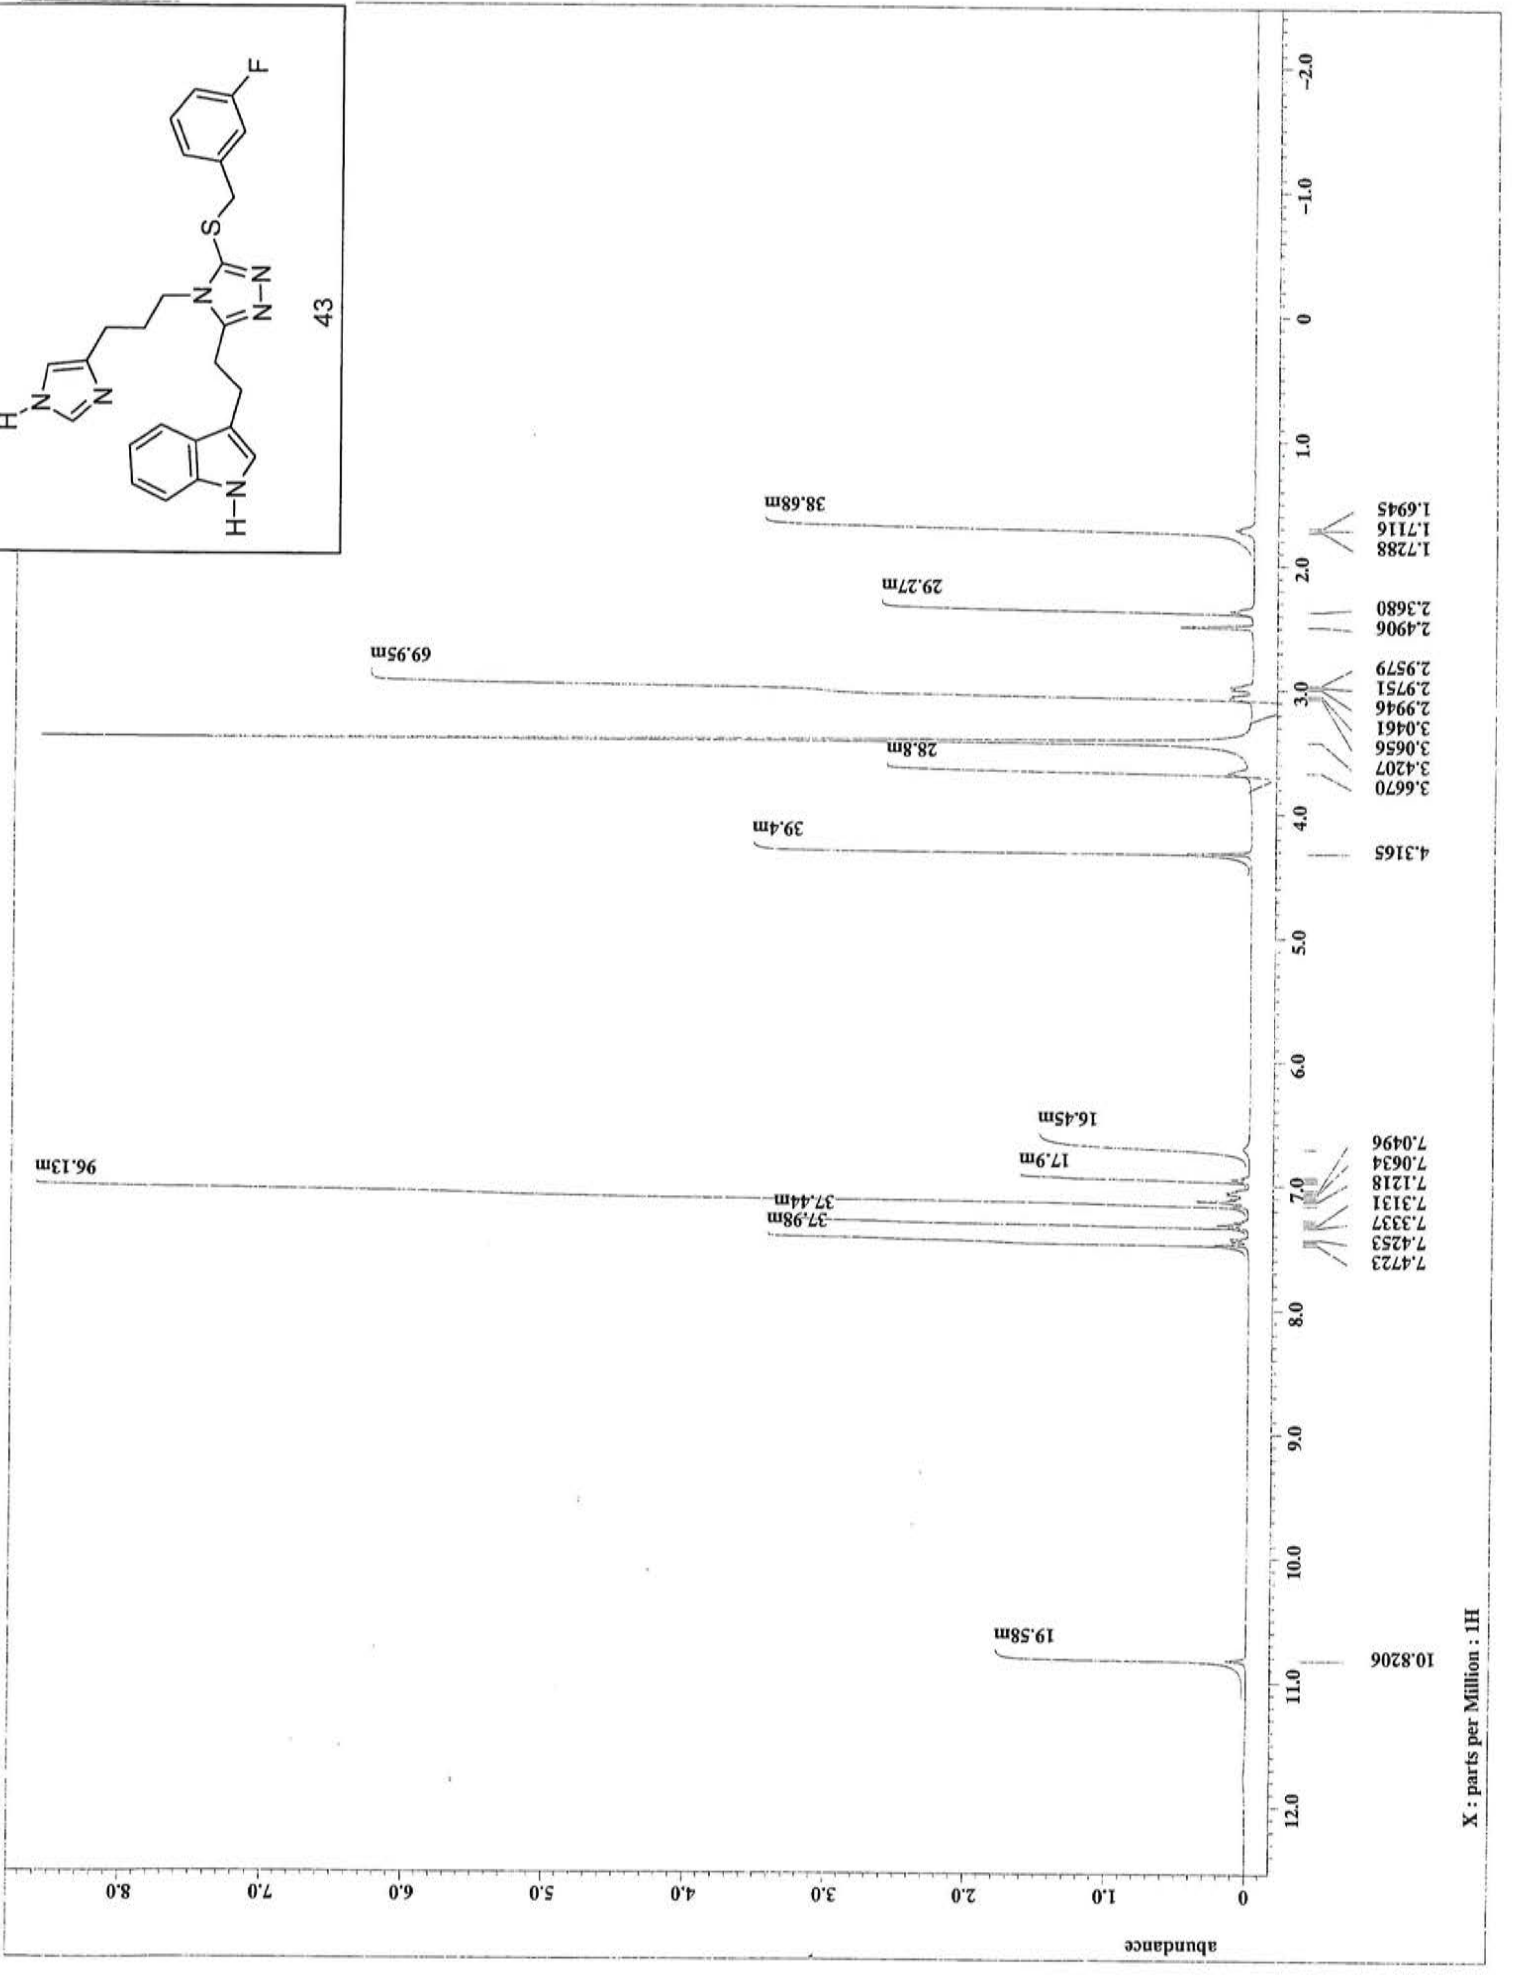

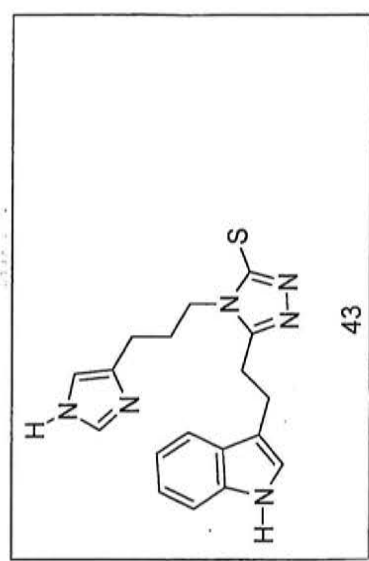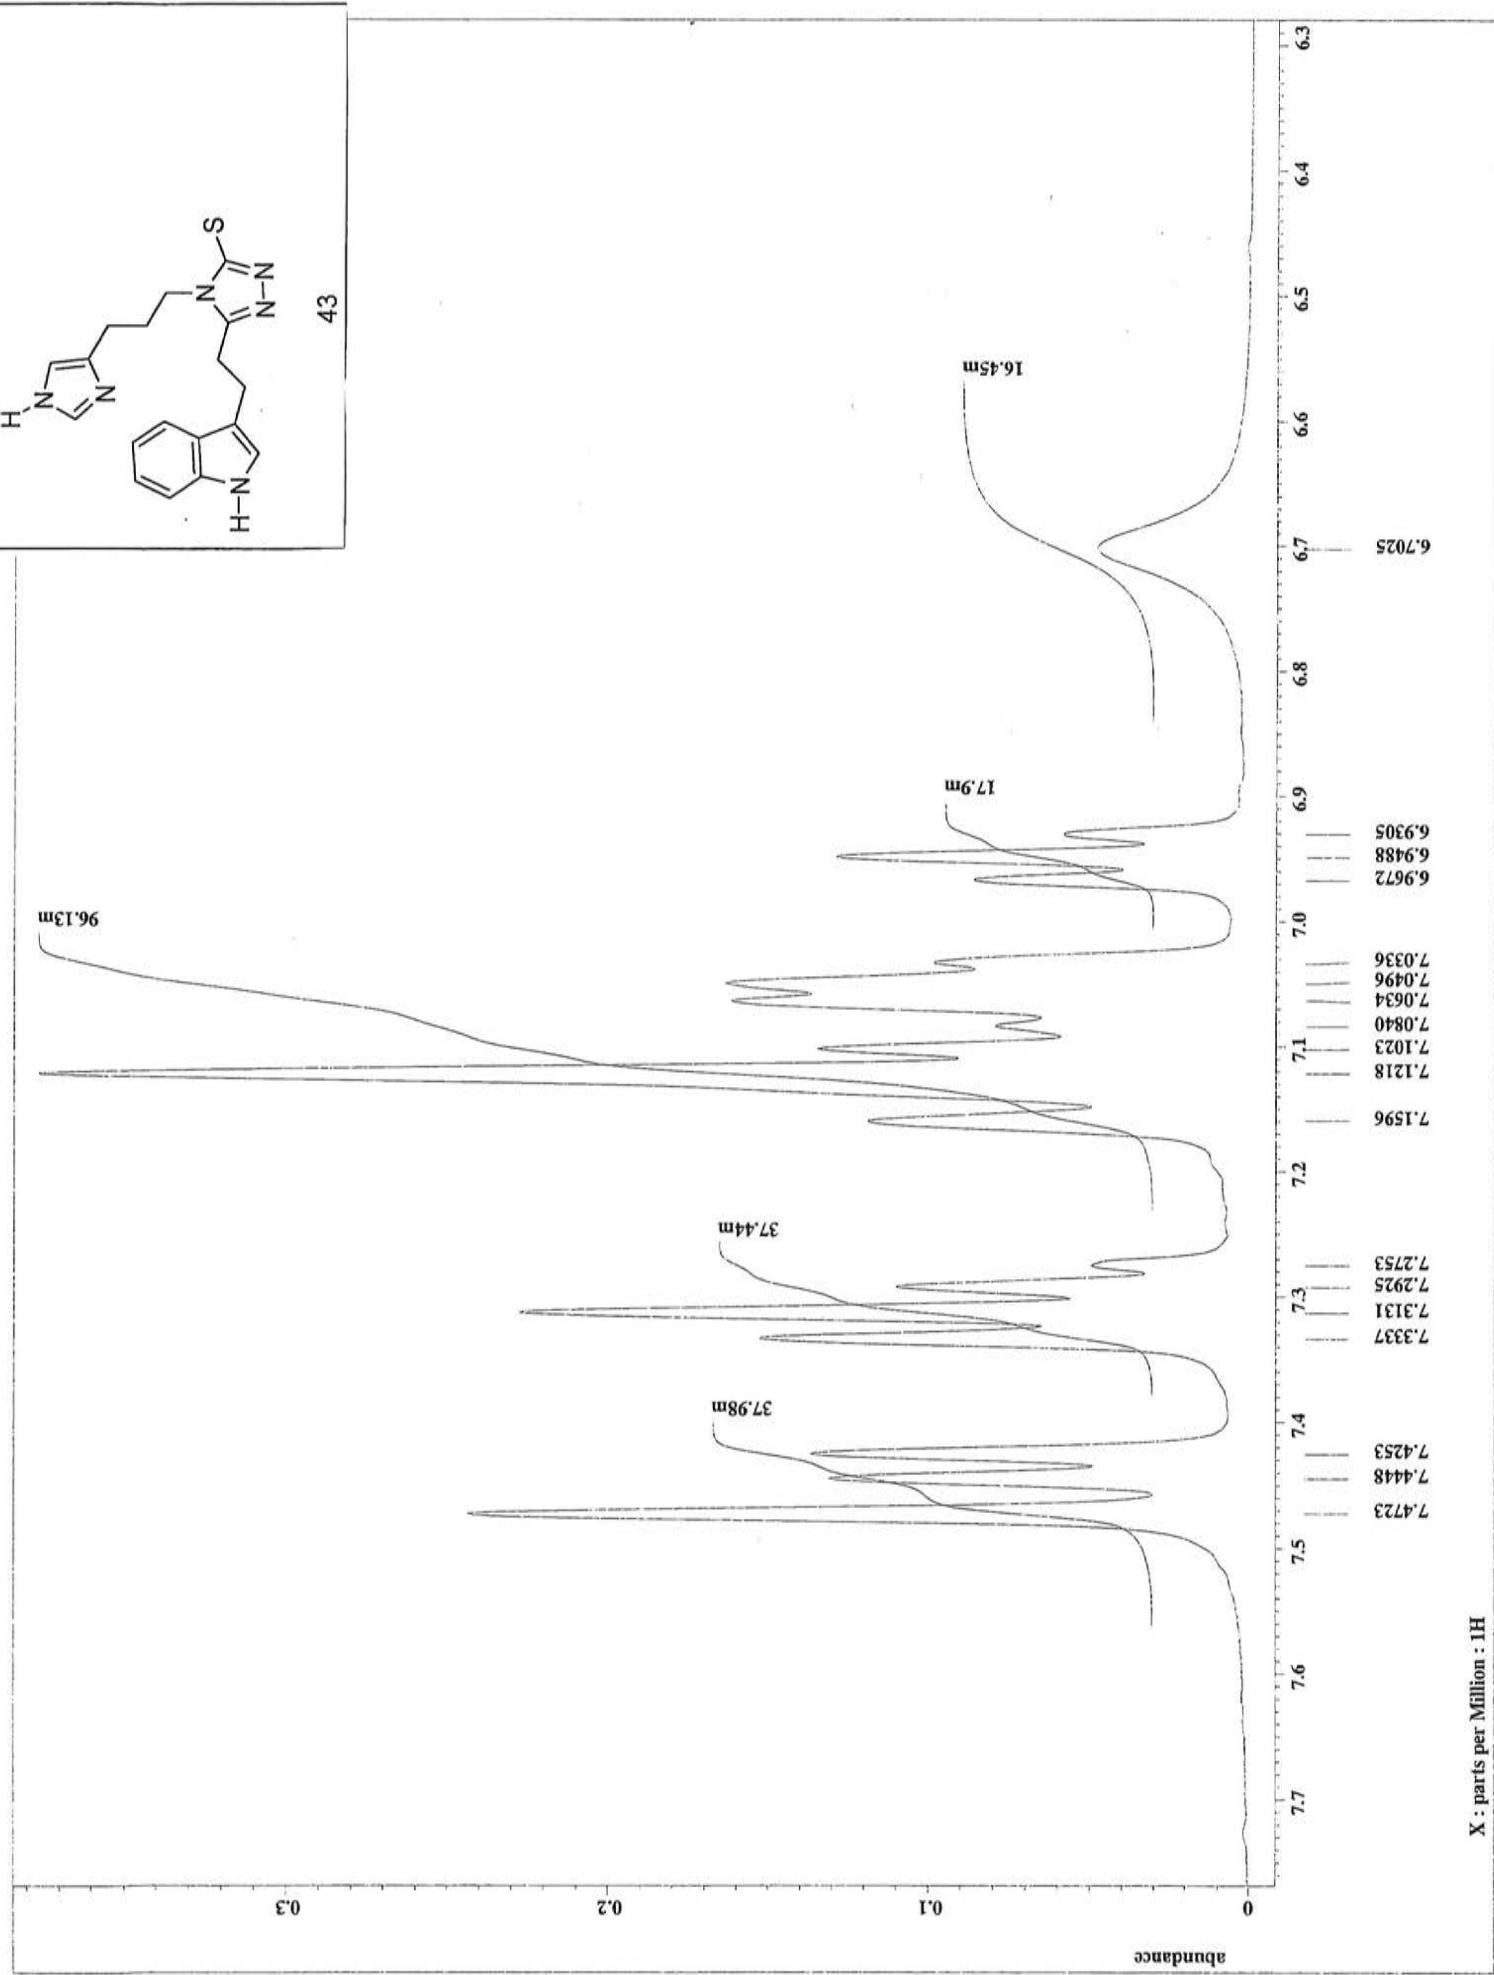

X : parts per Million : 1H



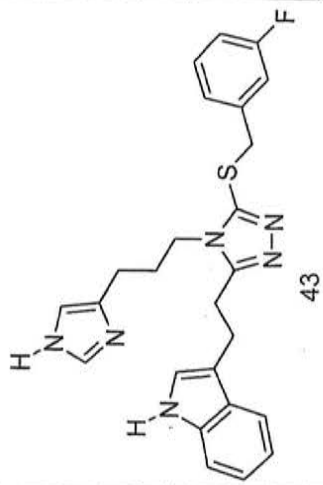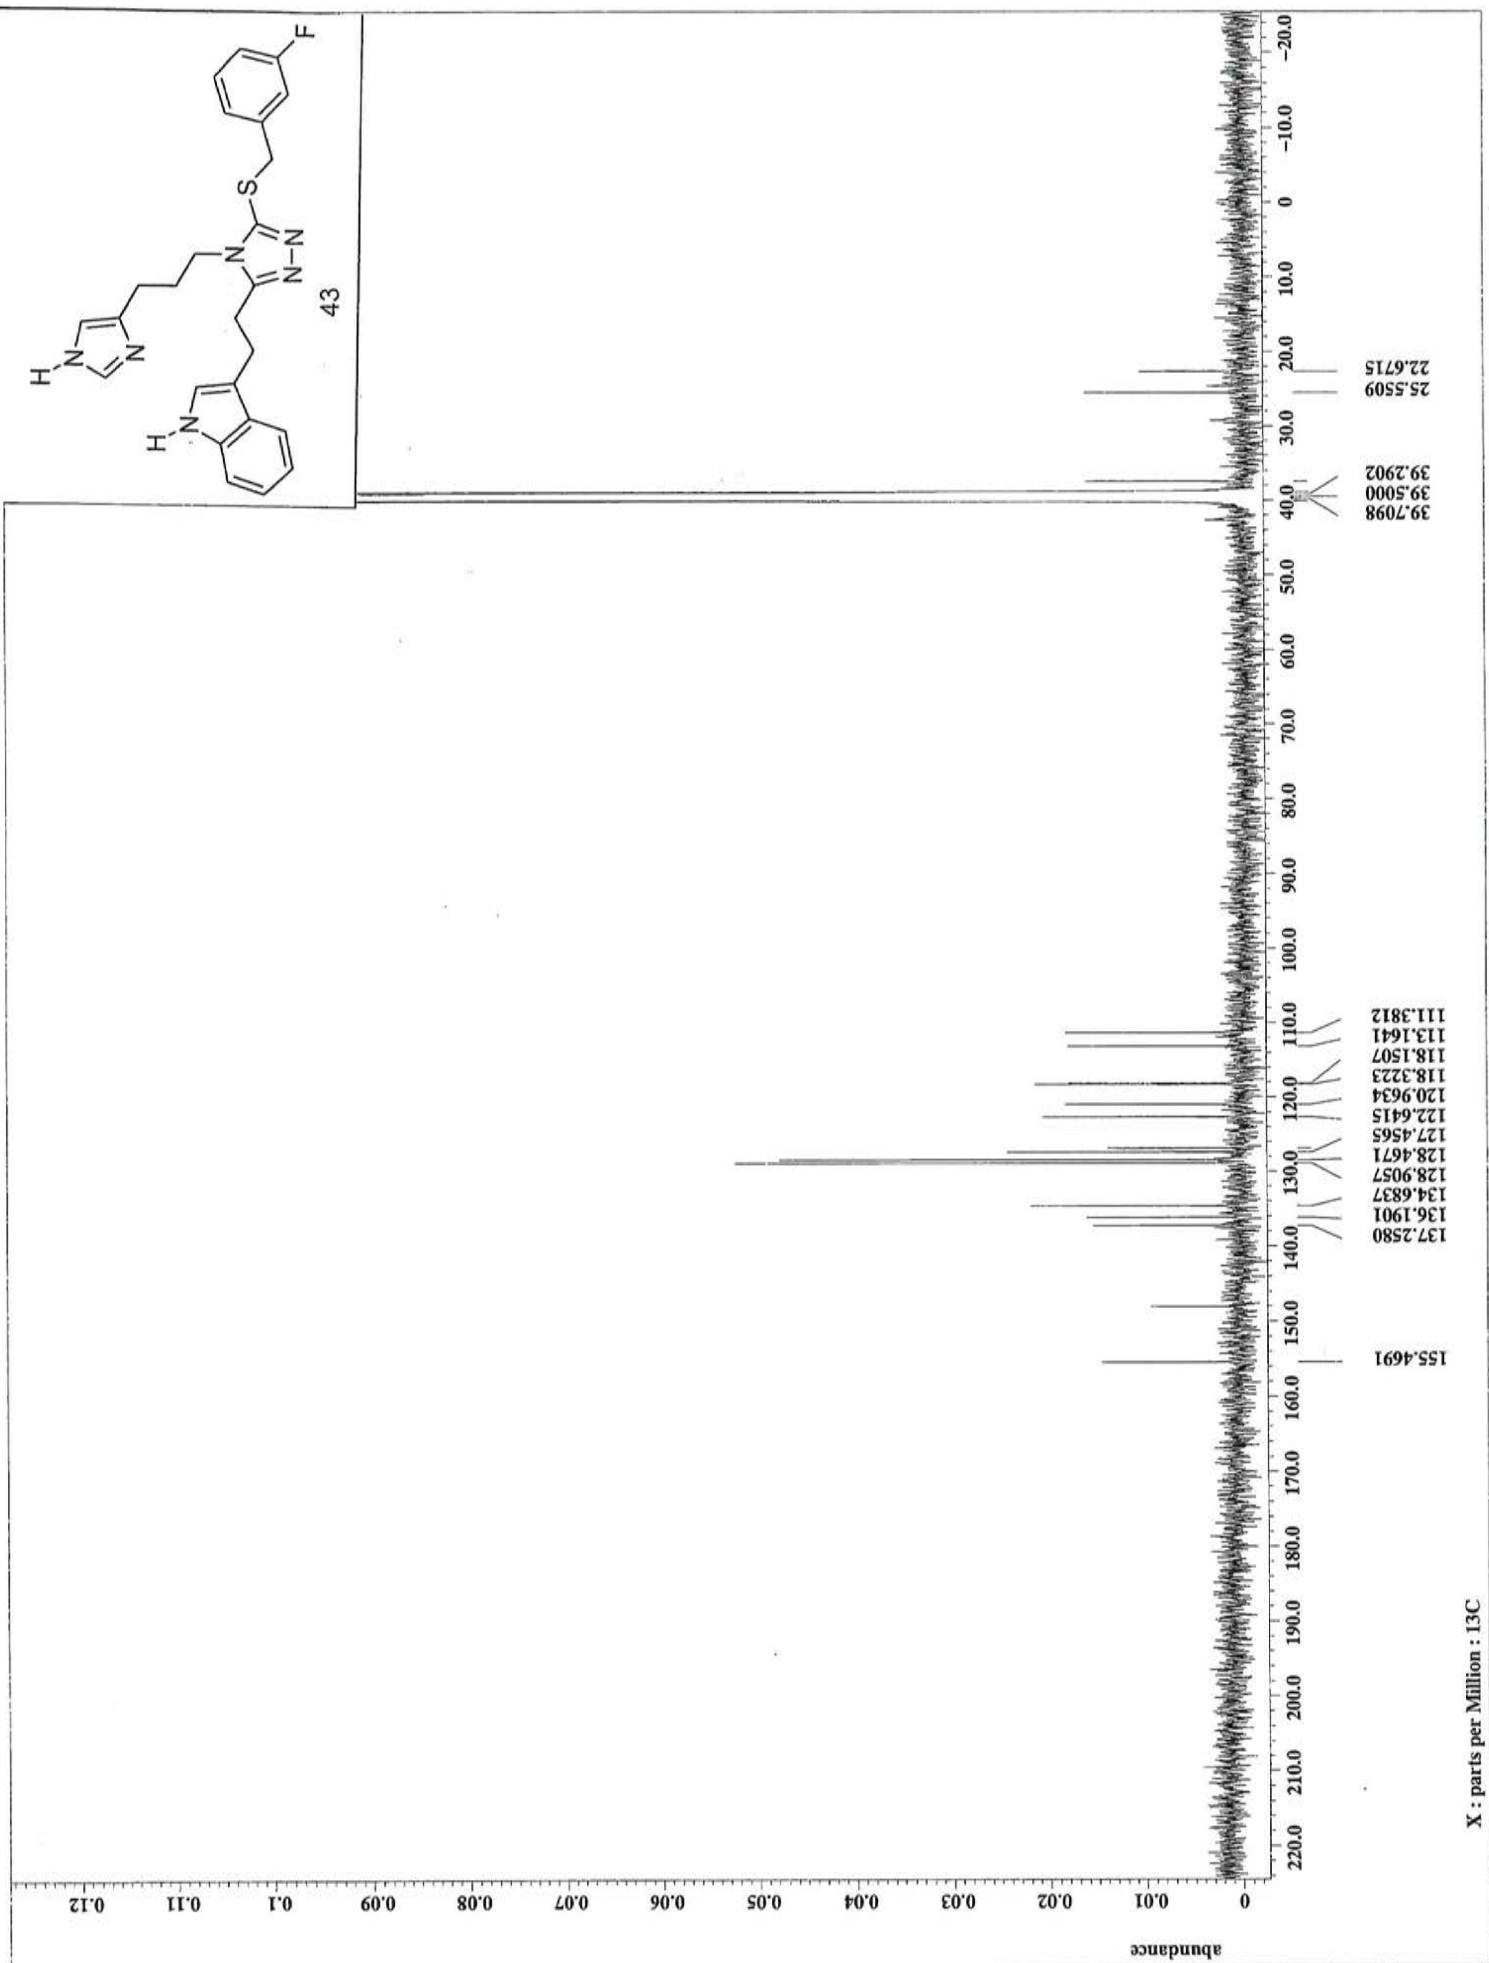

750 300

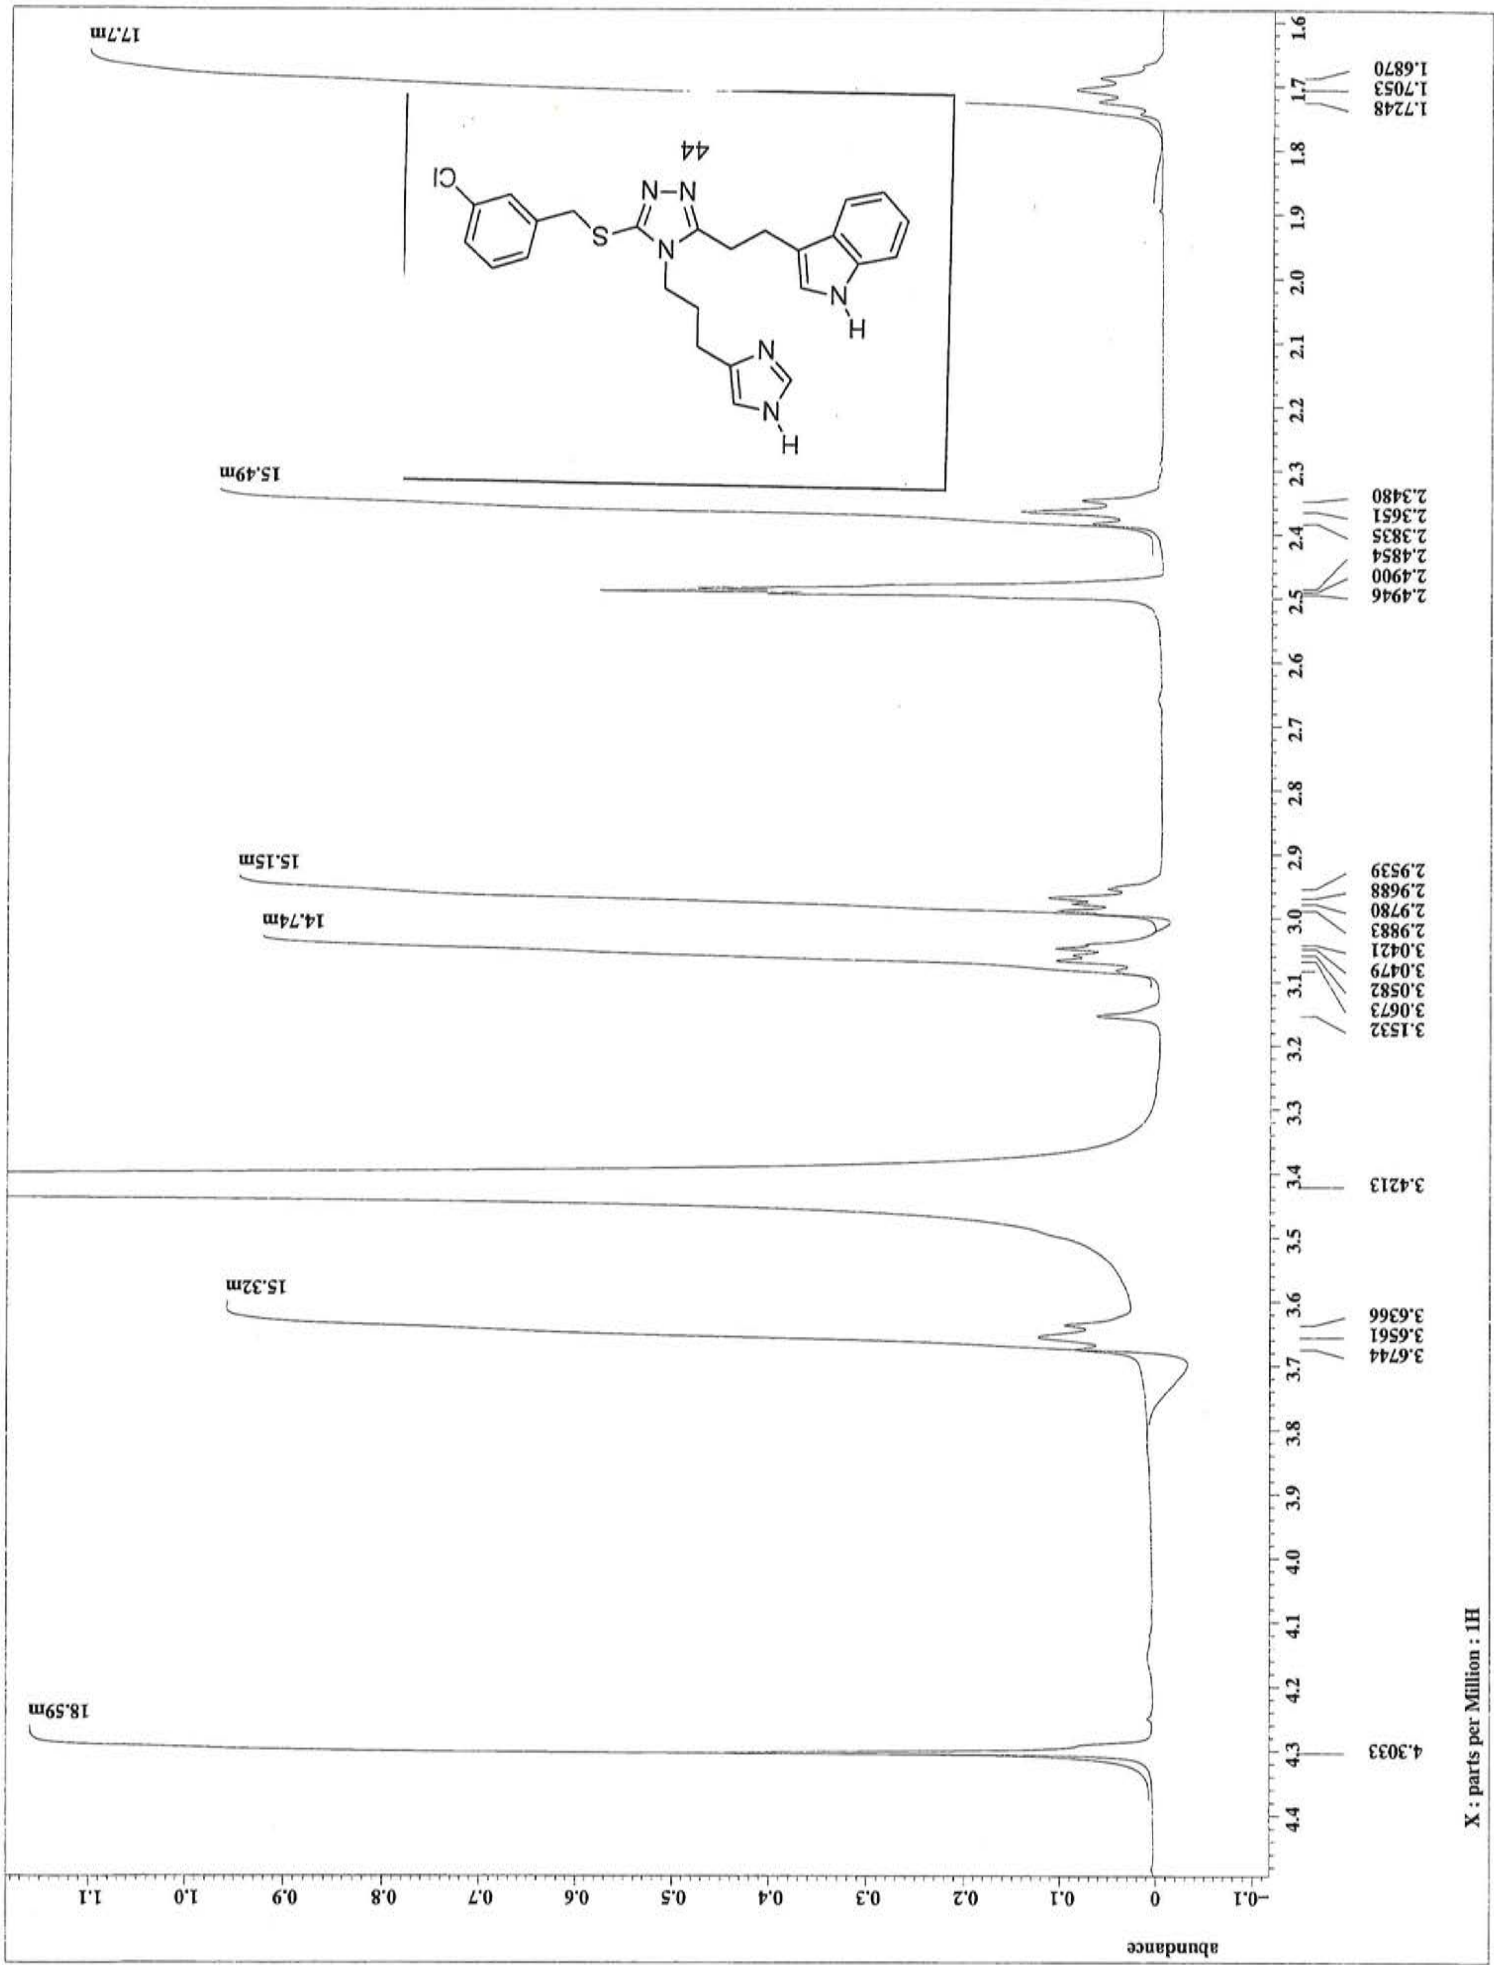

- 1.6870
- 1.7053
- 1.7248
- 1.7
- 1.8
- 1.9
- 2.0
- 2.1
- 2.2
- 2.3
- 2.3480
- 2.3651
- 2.3835
- 2.4854
- 2.4900
- 2.4946
- 2.5
- 2.6
- 2.7
- 2.8
- 2.9
- 2.9539
- 2.9688
- 2.9780
- 2.9883
- 3.0421
- 3.0479
- 3.0582
- 3.0673
- 3.1532
- 3.2
- 3.3
- 3.4
- 3.4213
- 3.5
- 3.6
- 3.6366
- 3.6561
- 3.6744
- 3.7
- 3.8
- 3.9
- 4.0
- 4.1
- 4.2
- 4.3
- 4.3033
- 4.4

X : parts per Million : 1H

abundance

17.7m

15.49m

15.15m

14.74m

15.32m

18.59m

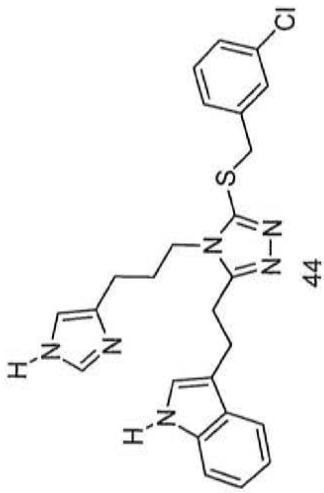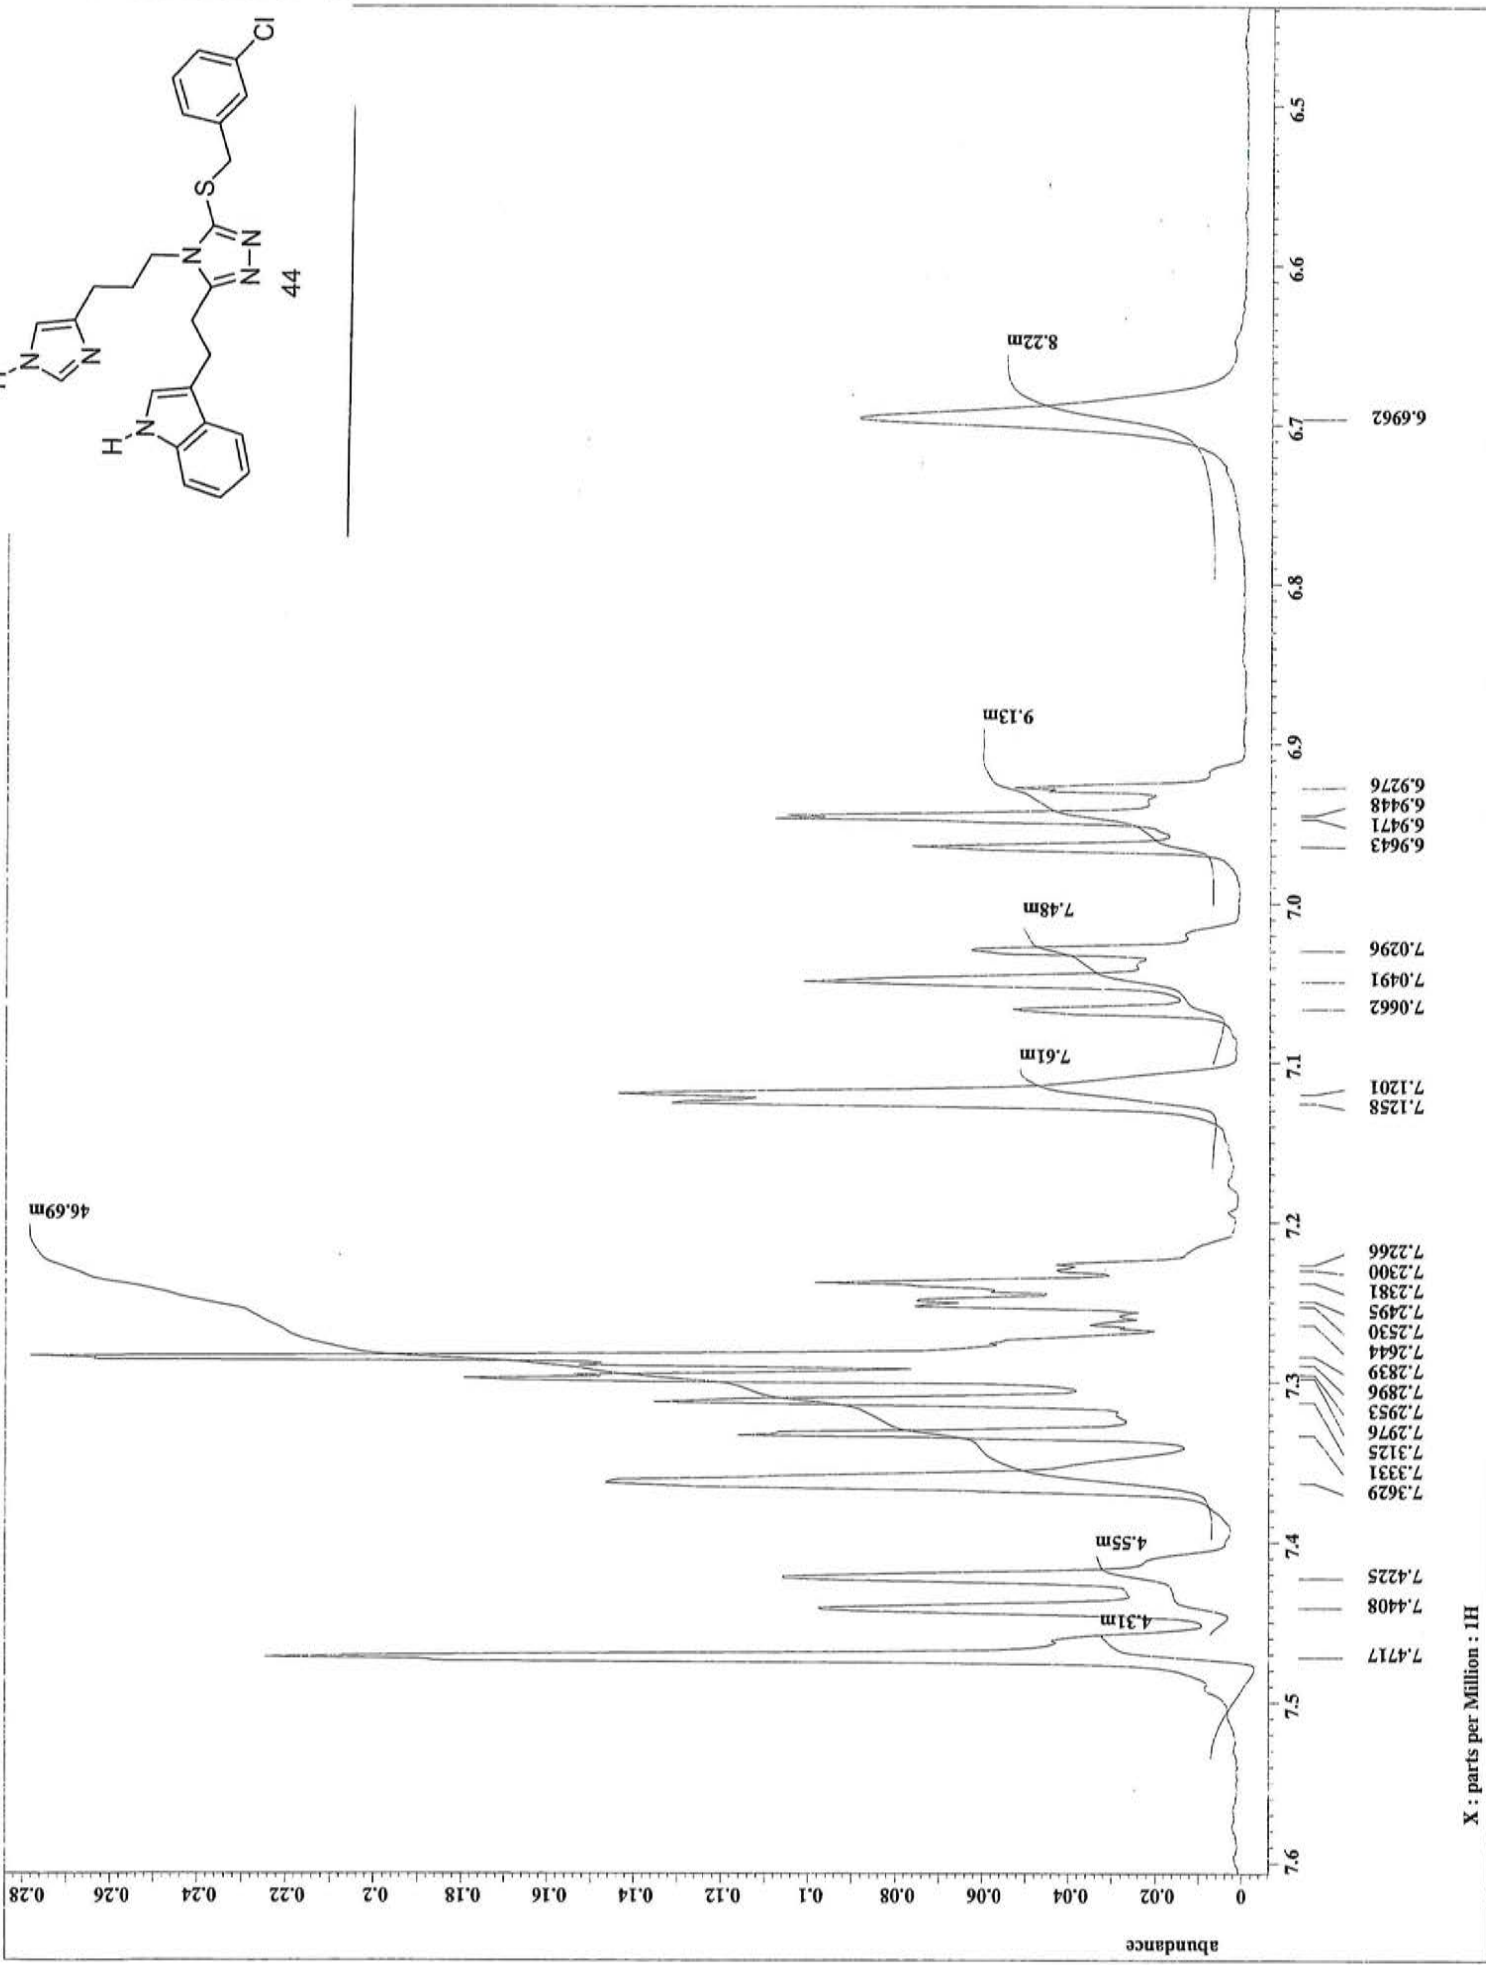

X : parts per Million : 1H

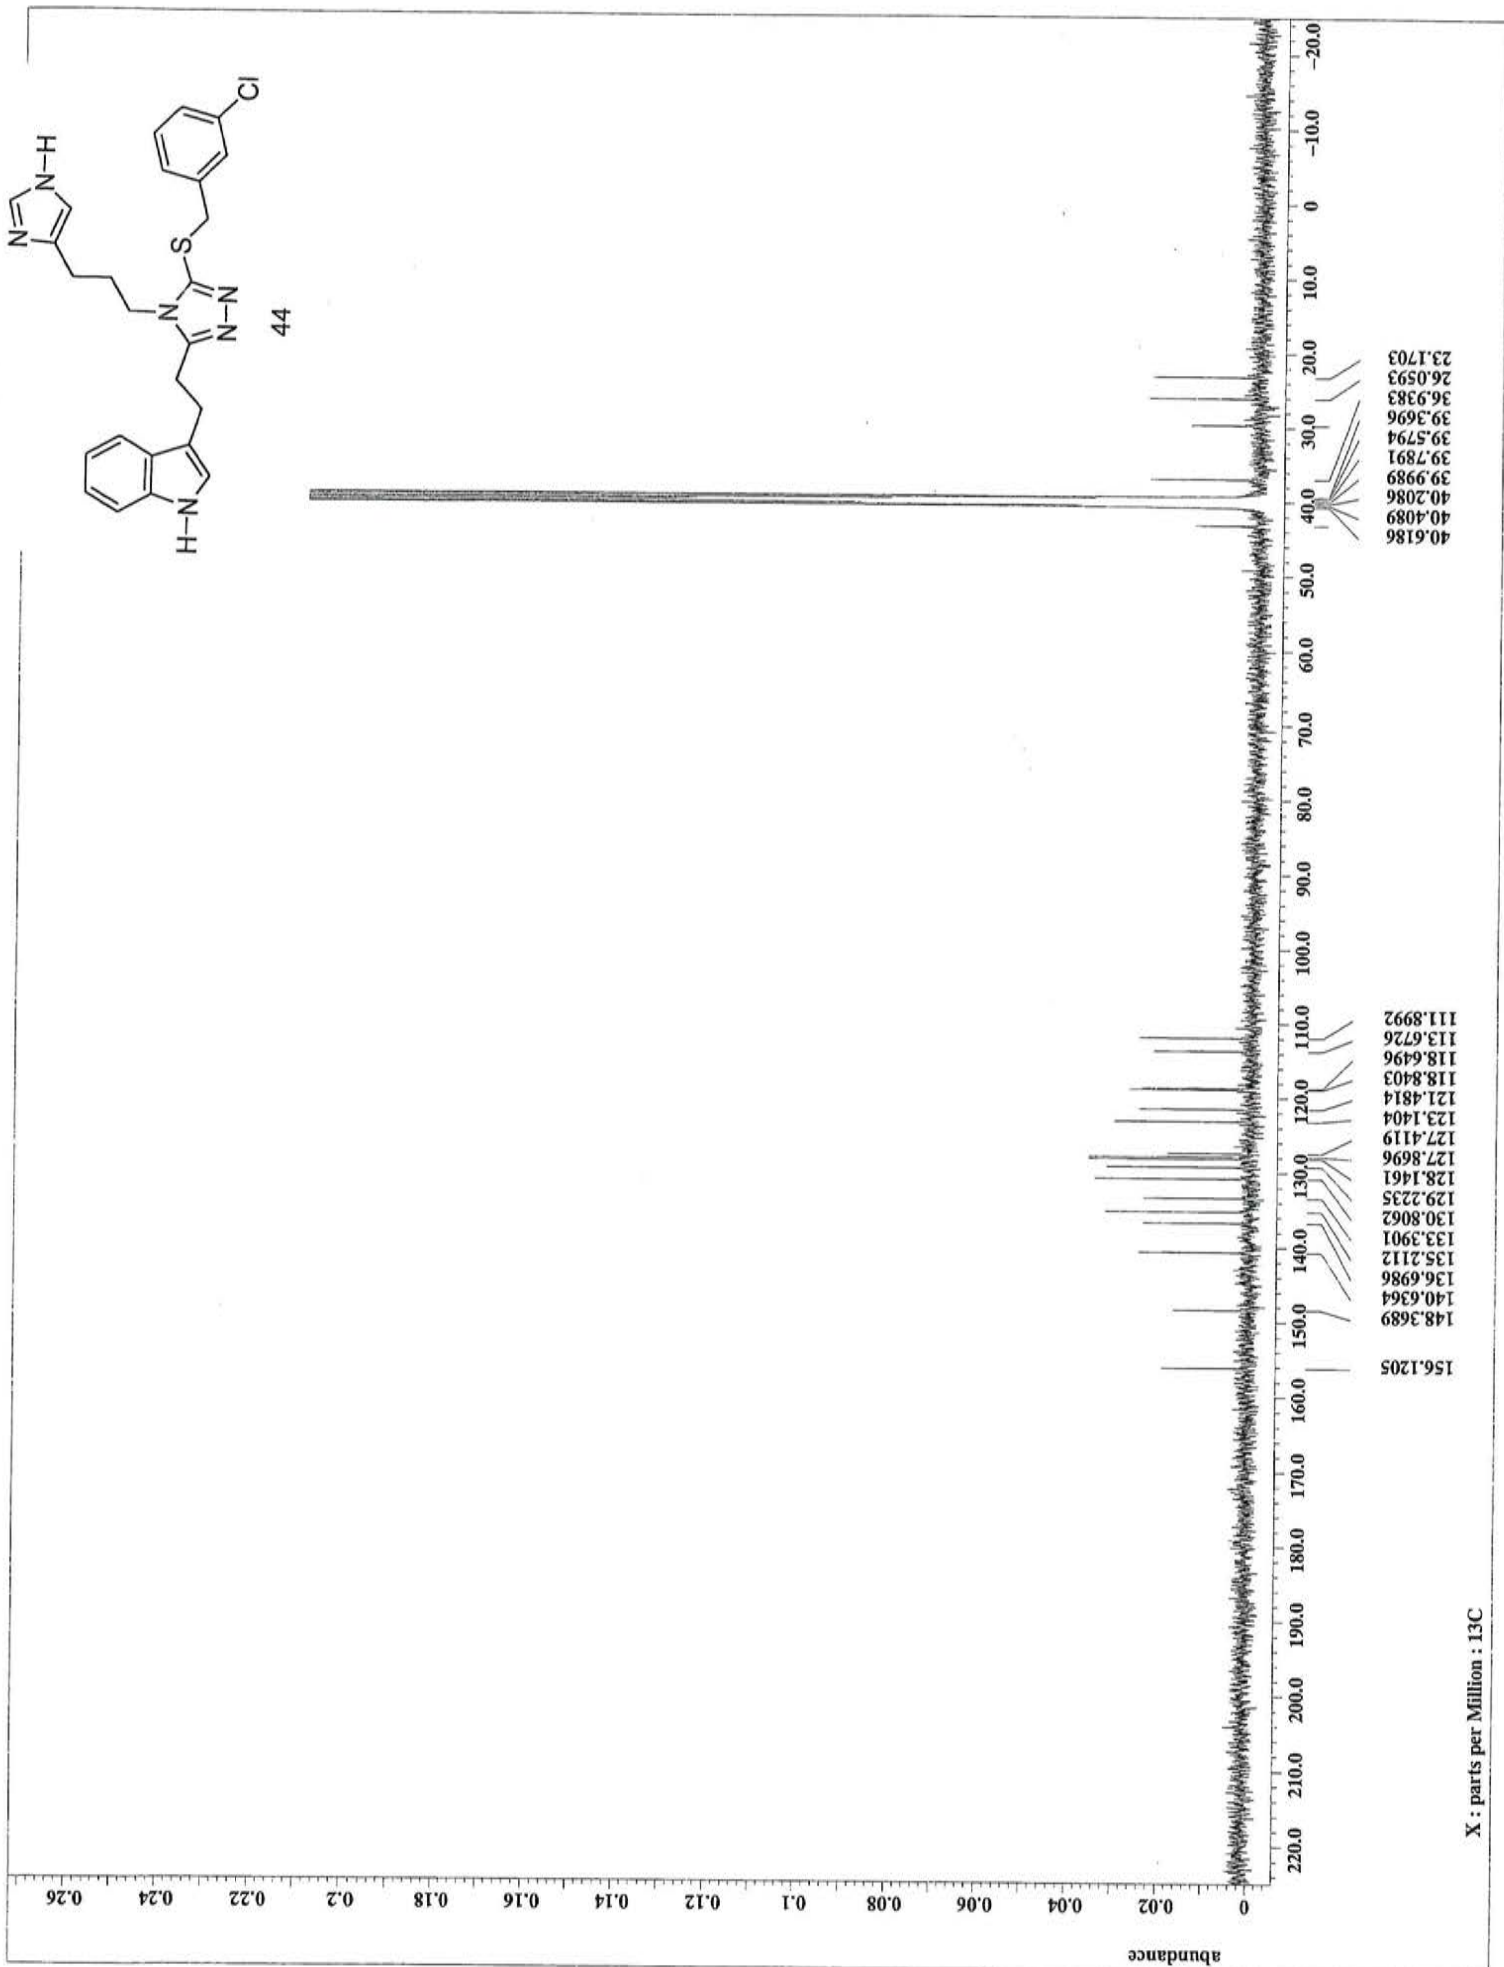

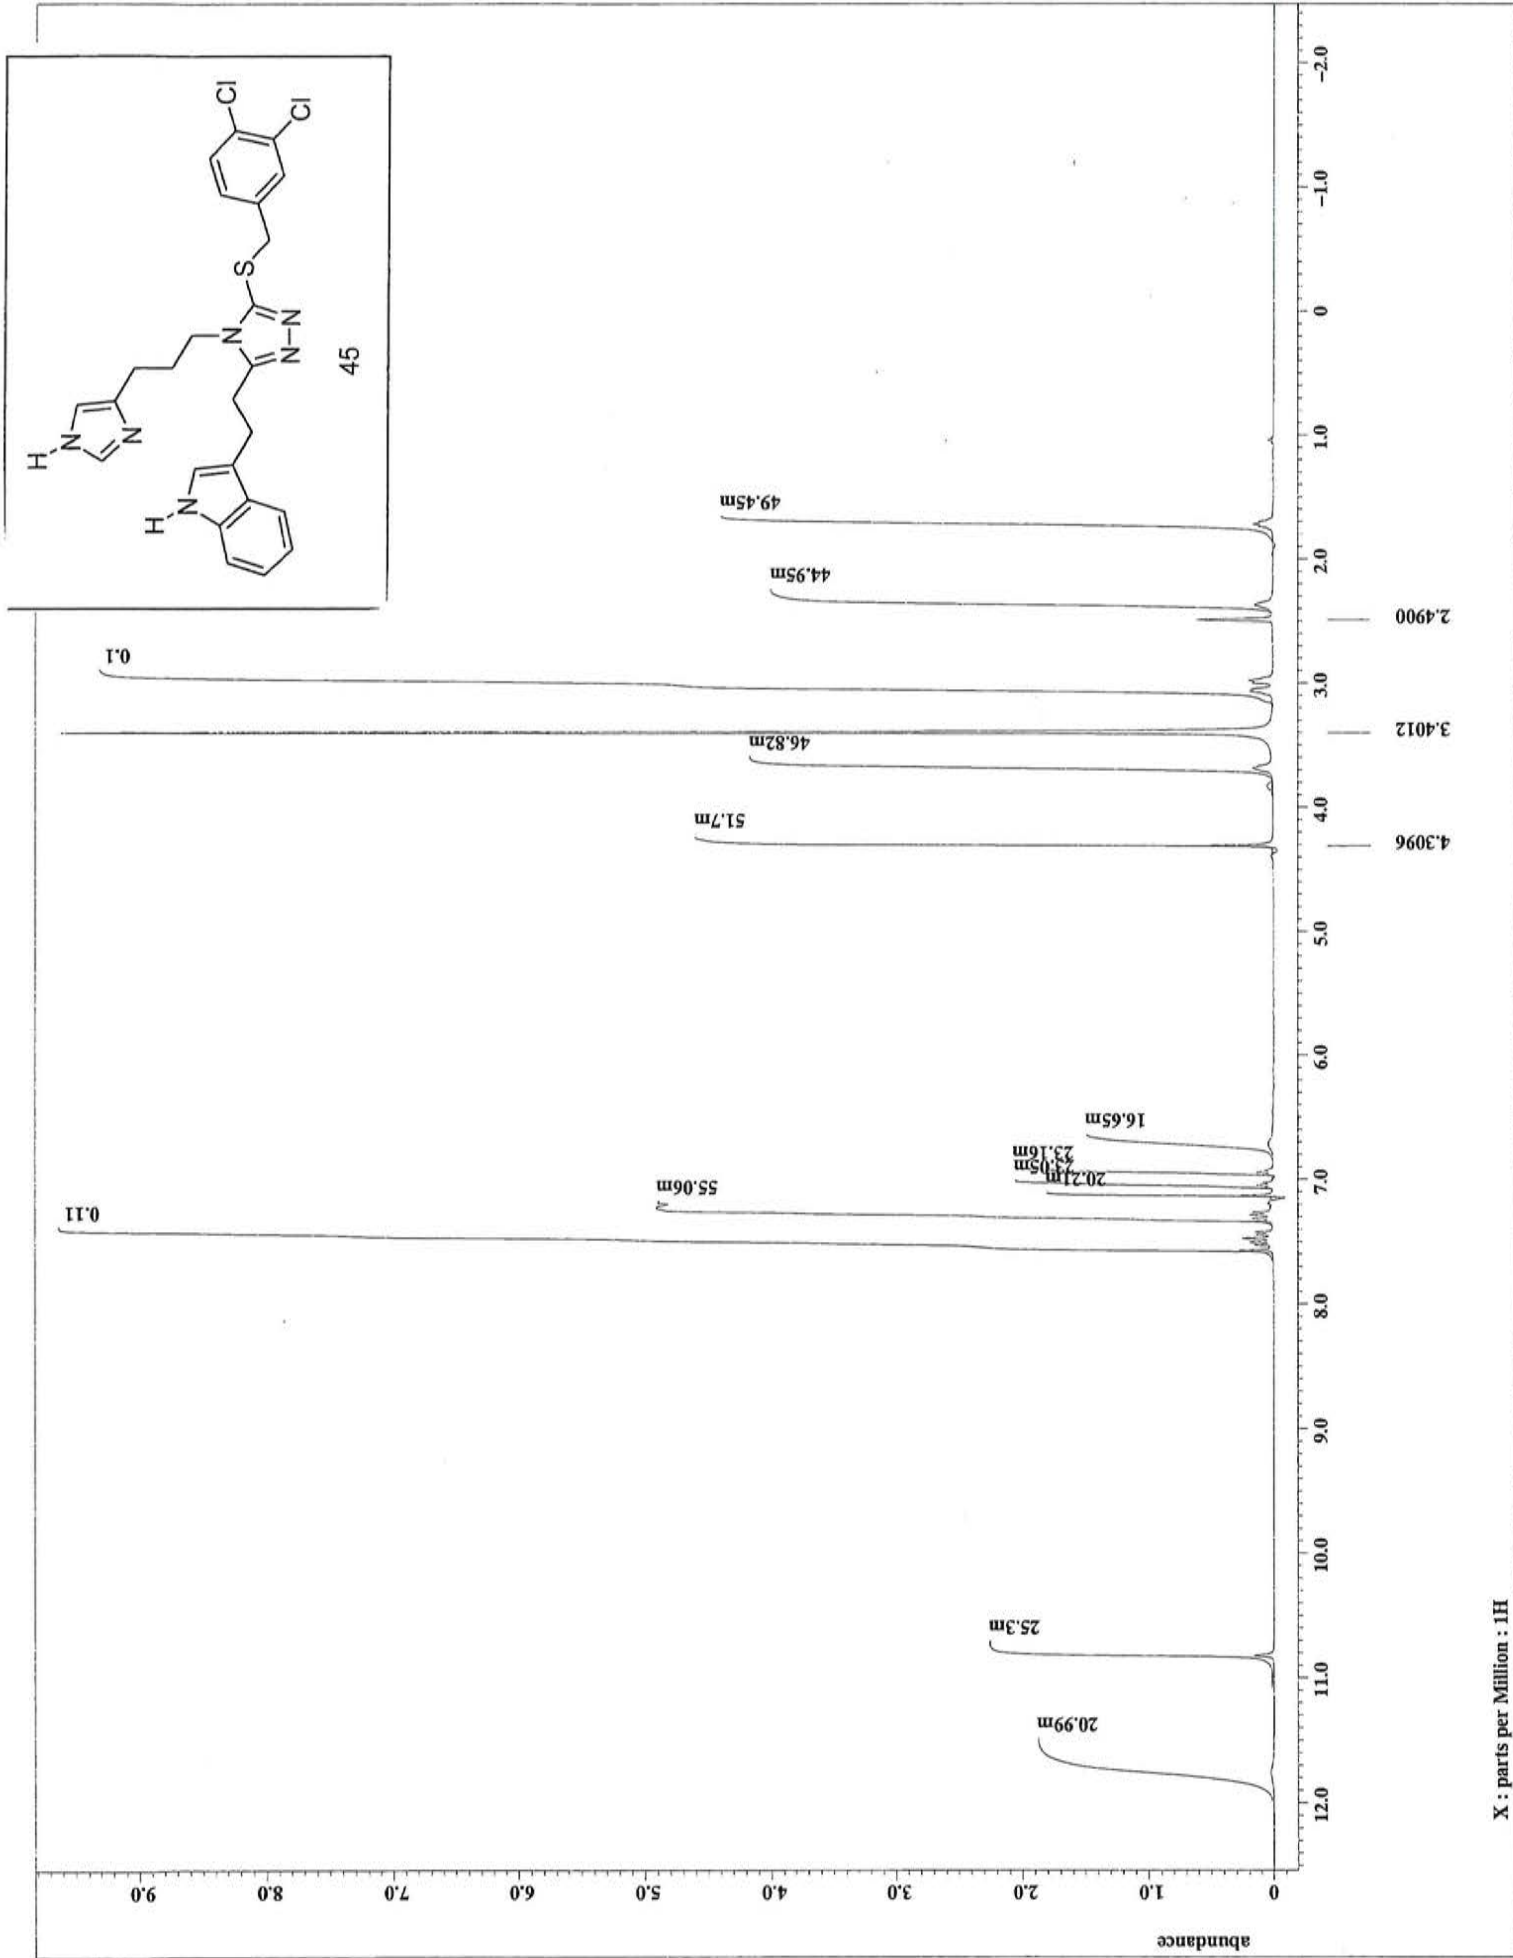

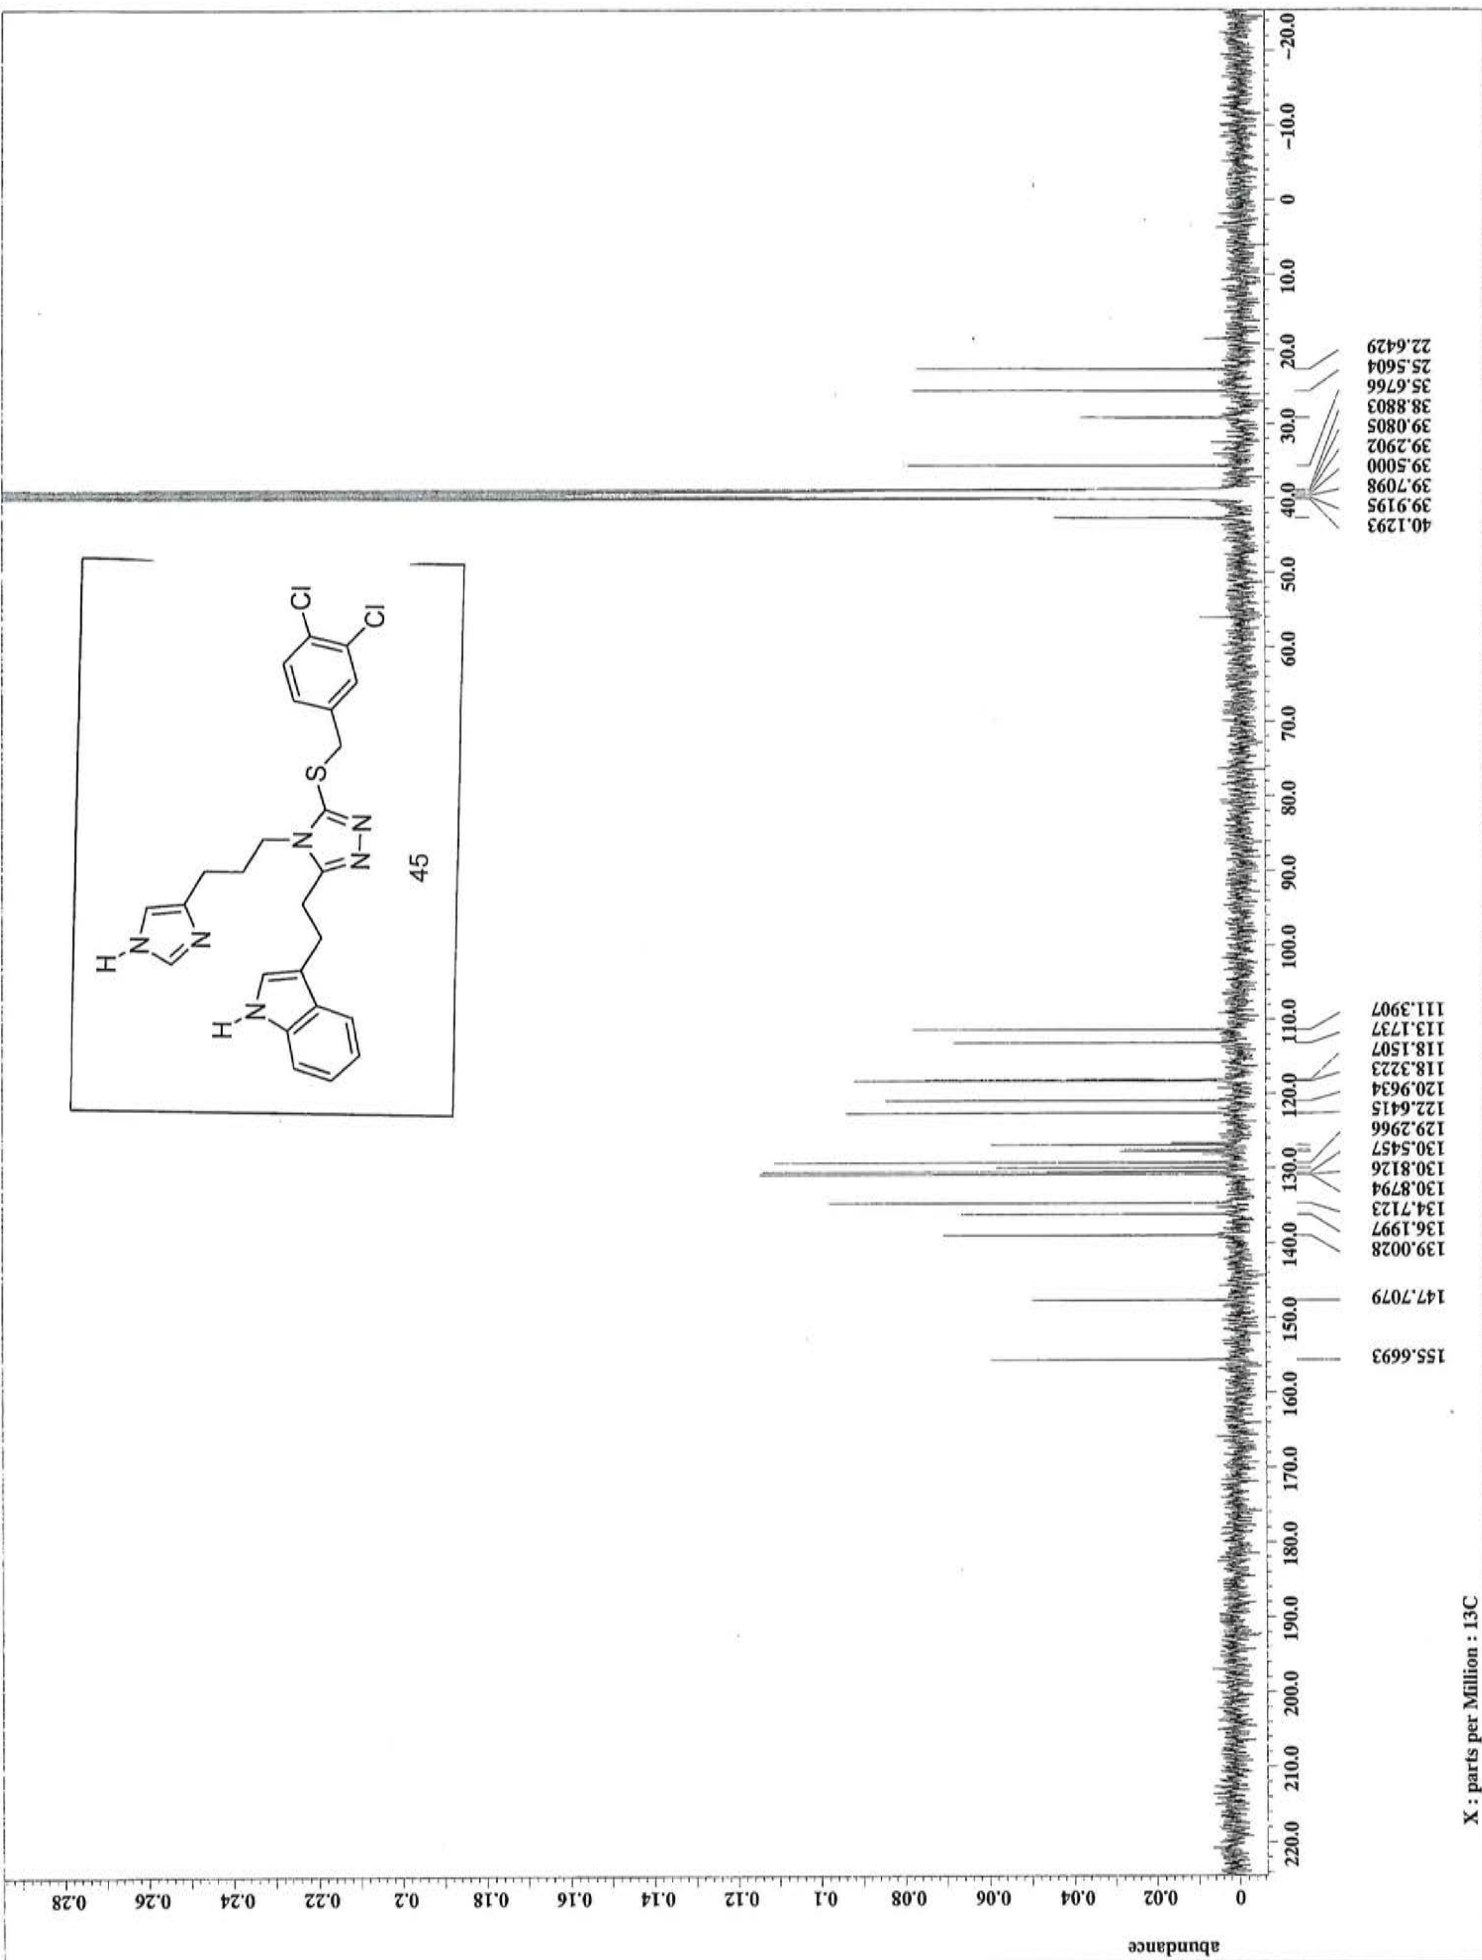

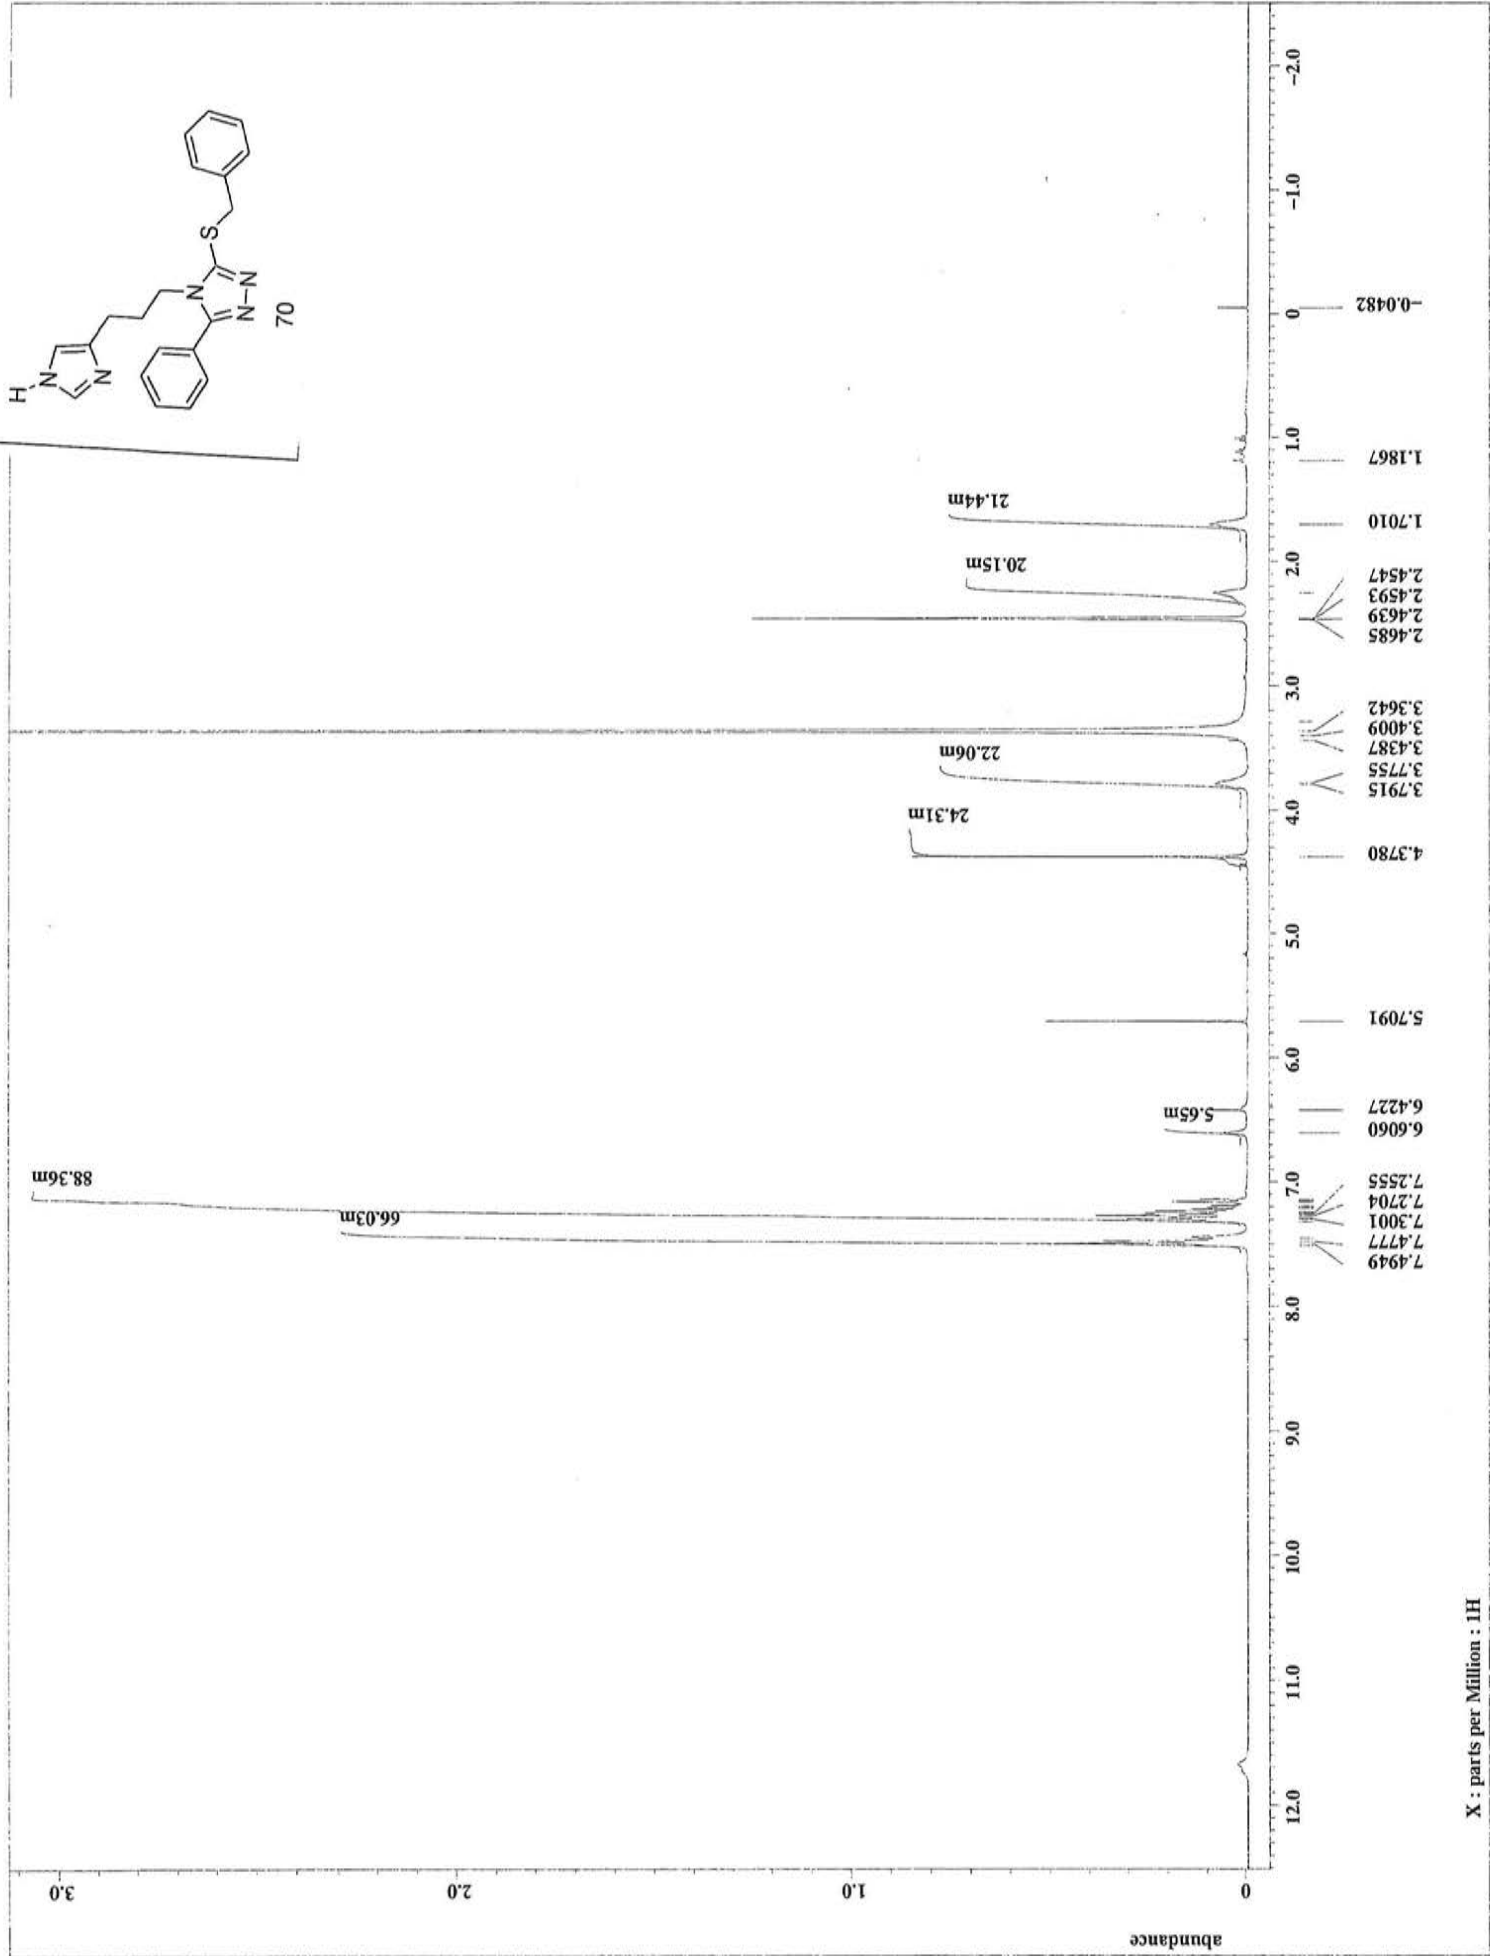

X : parts per Million : 1H

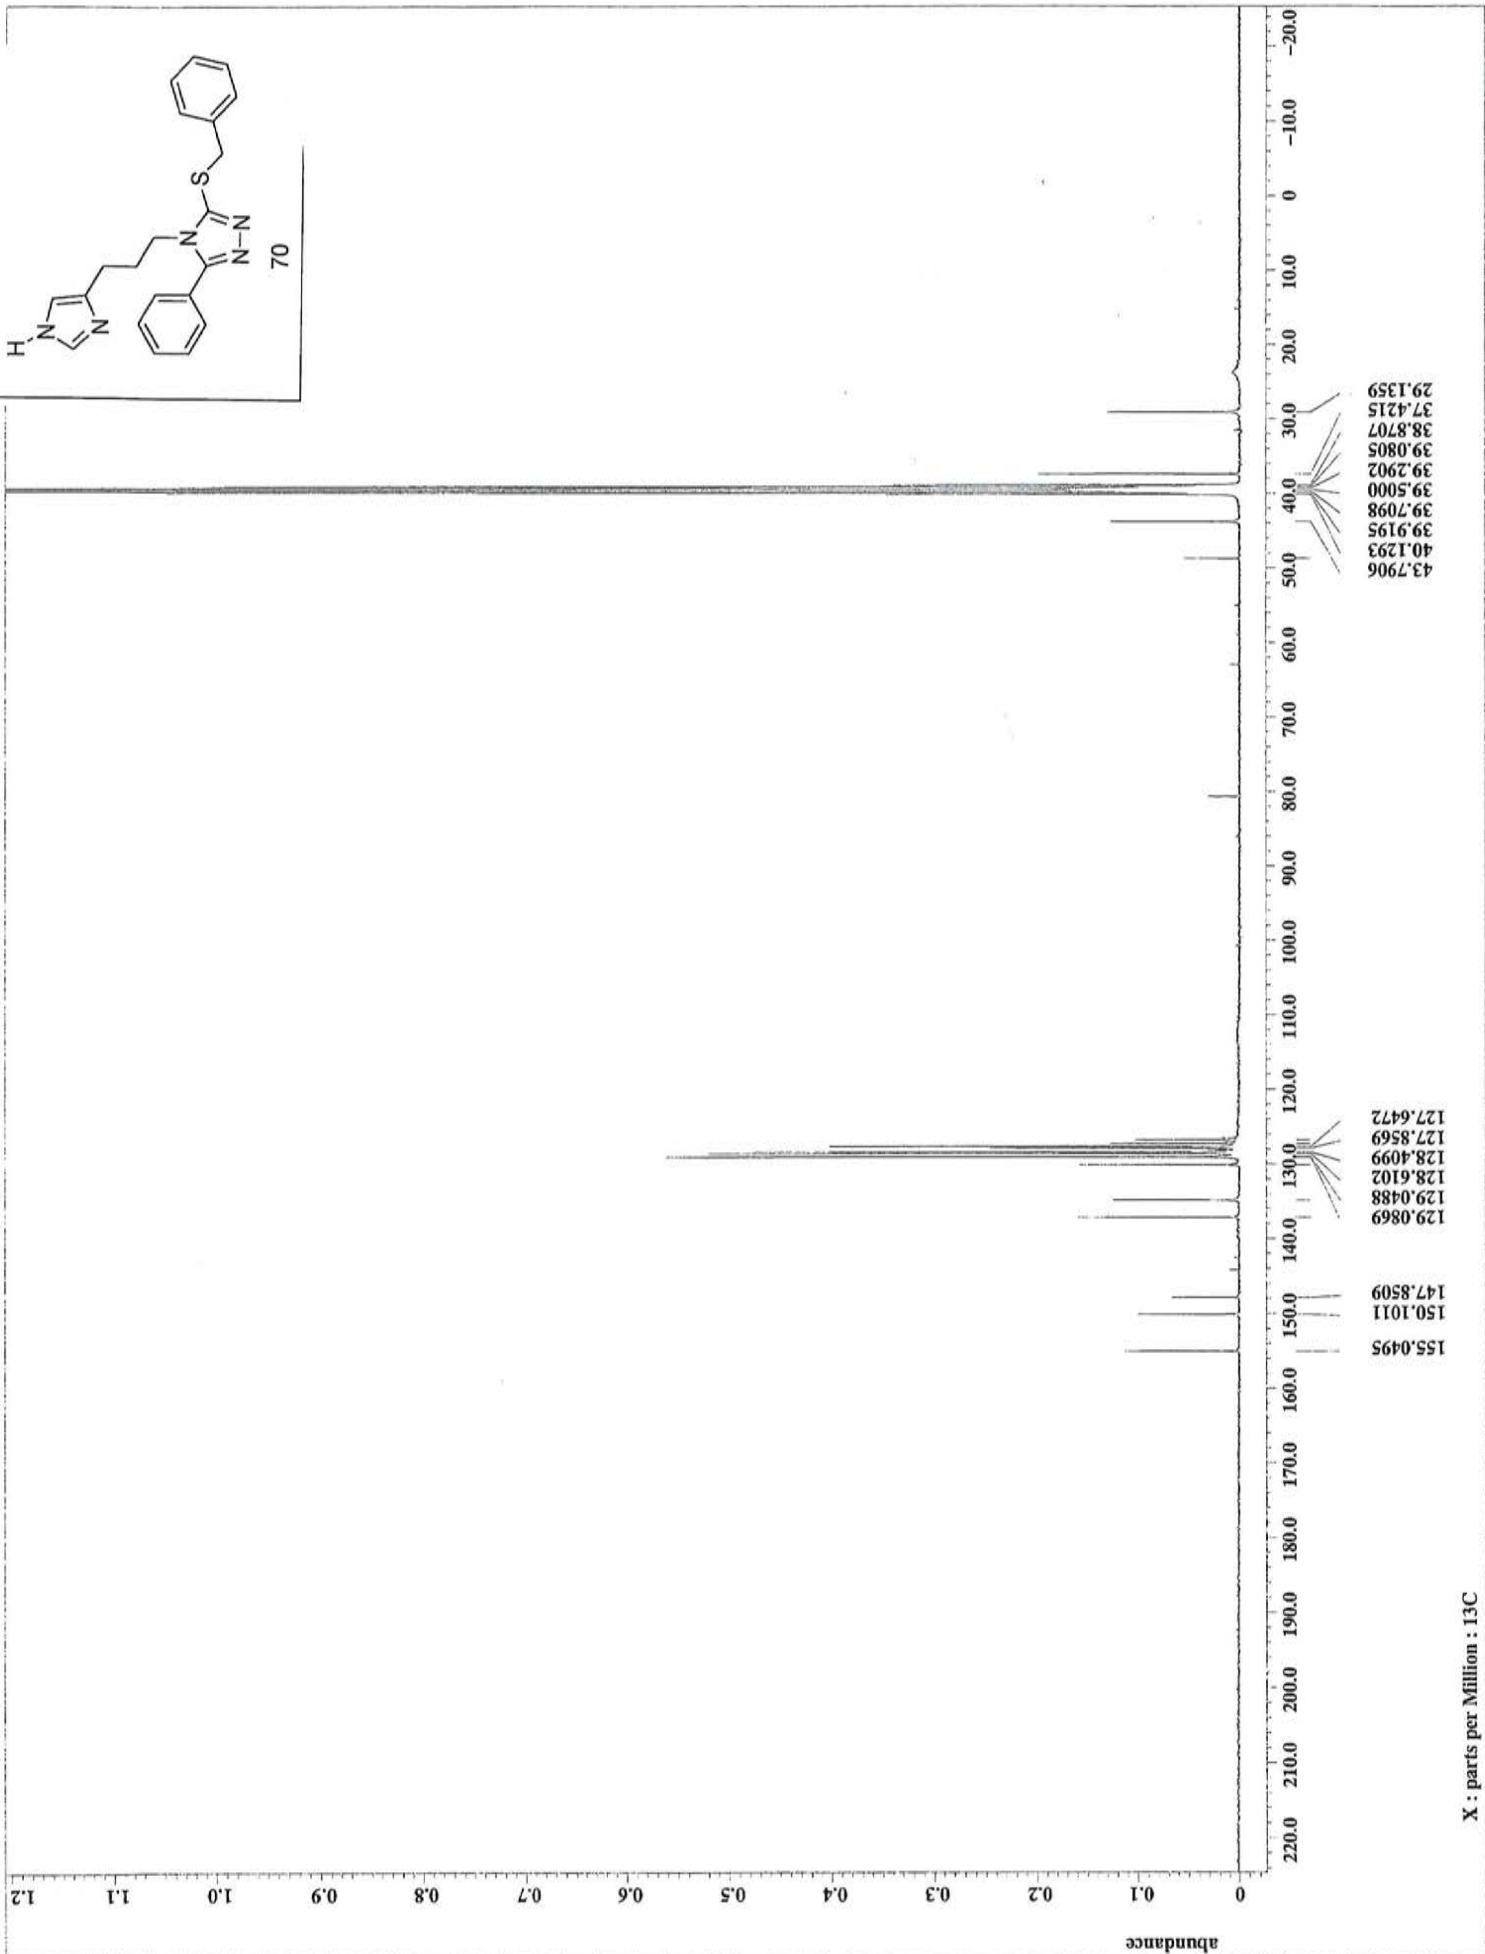



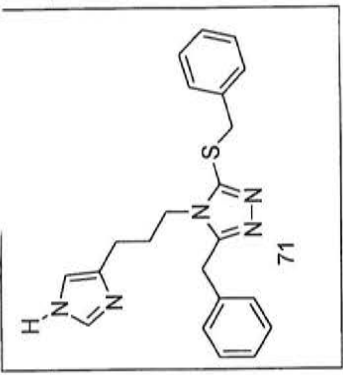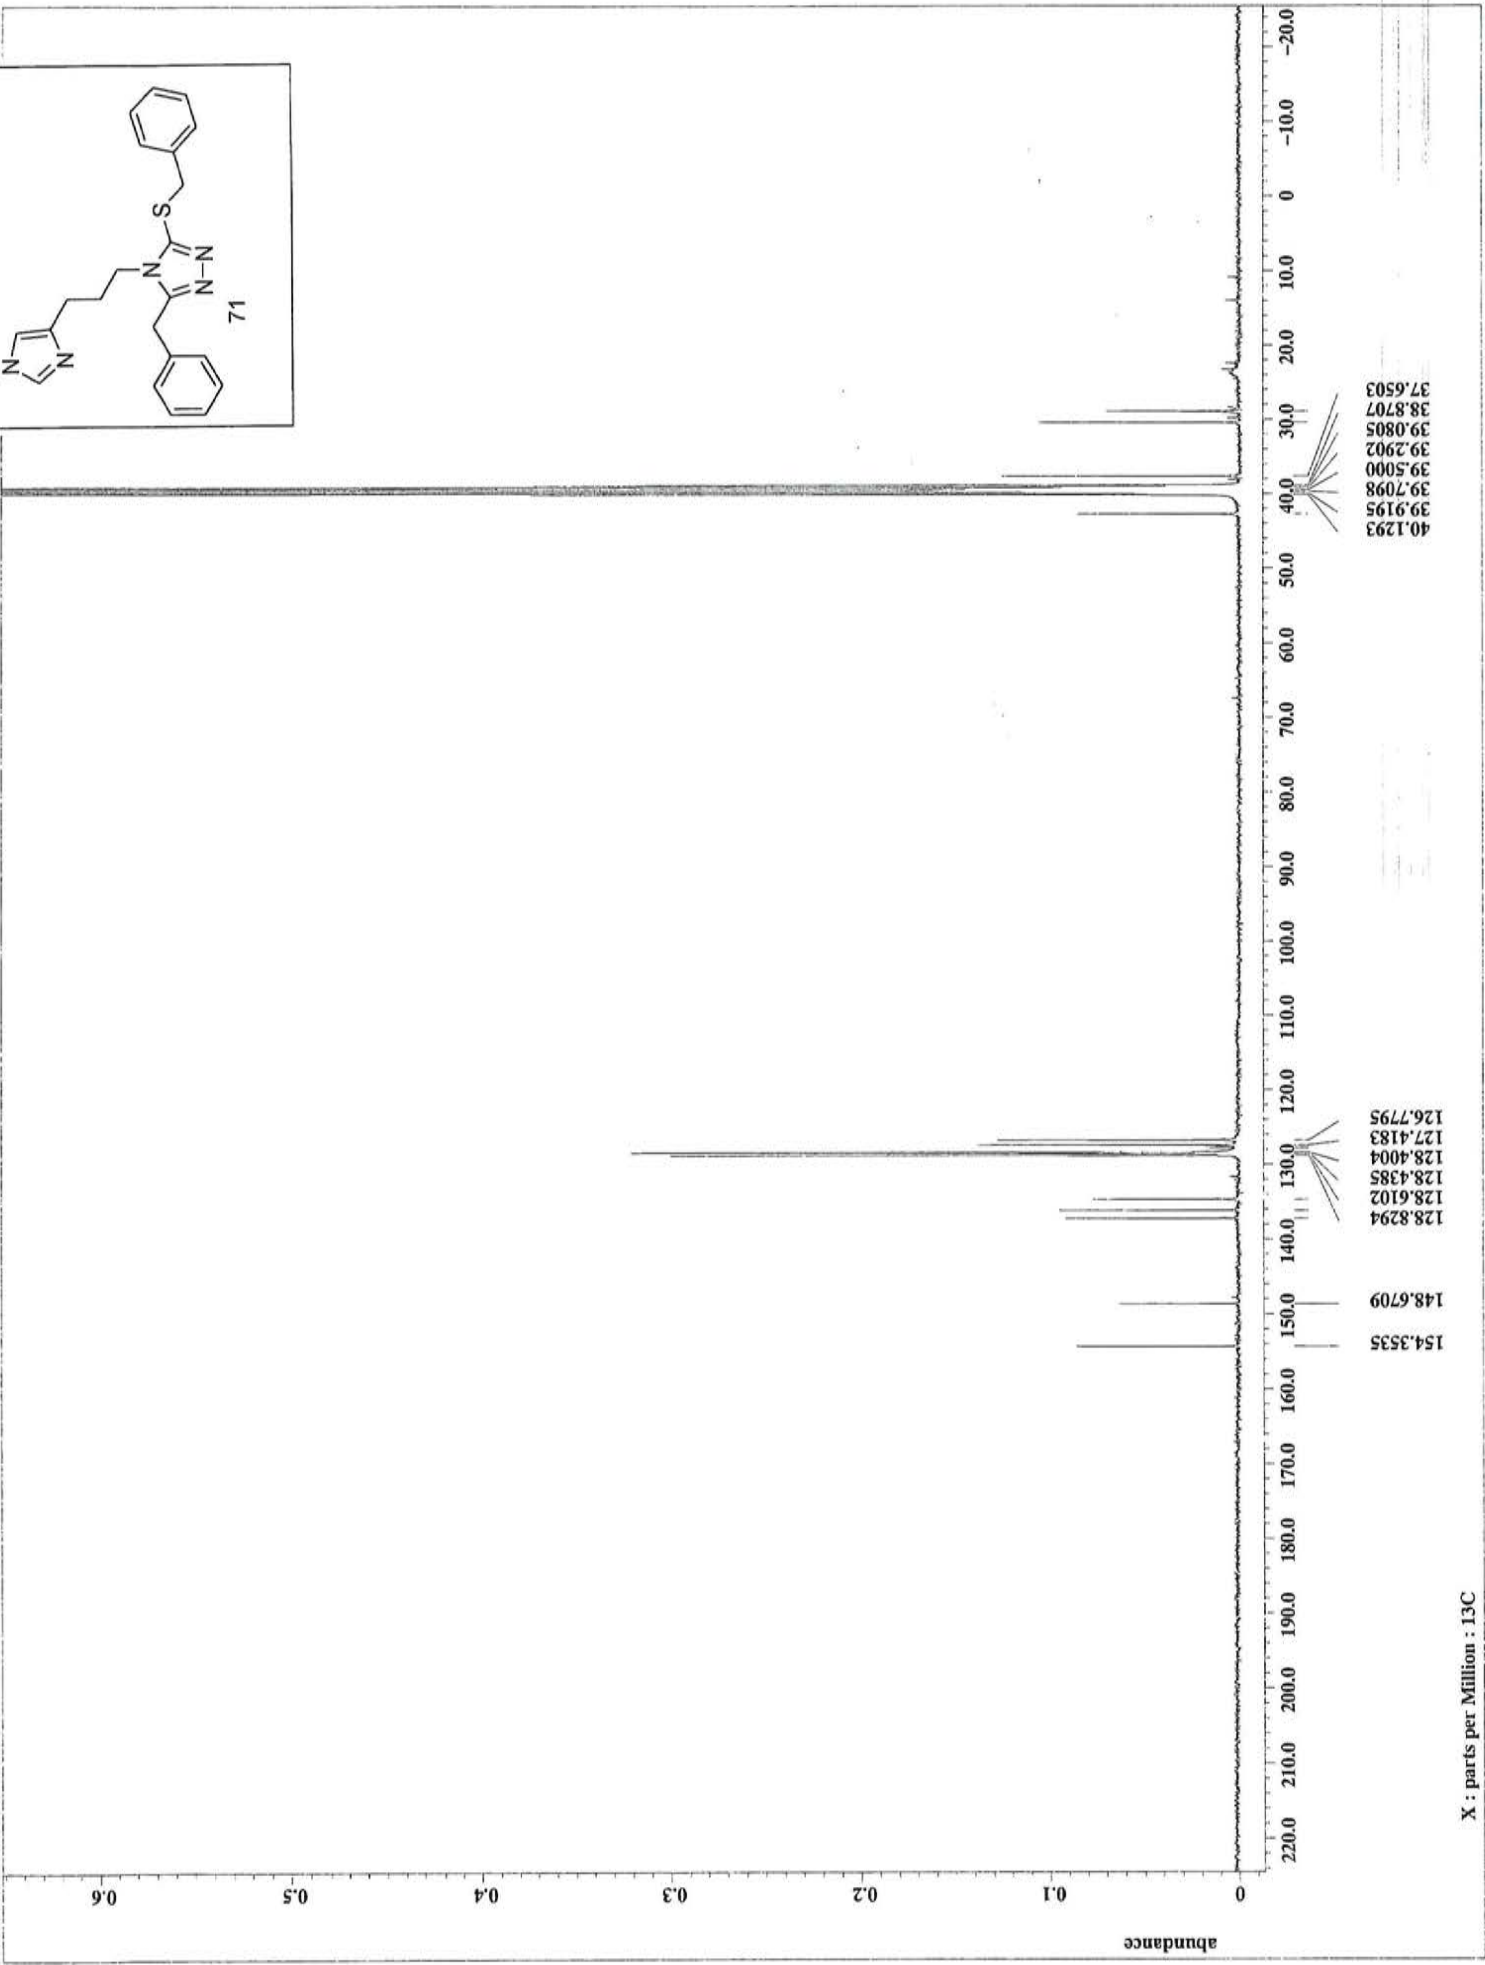

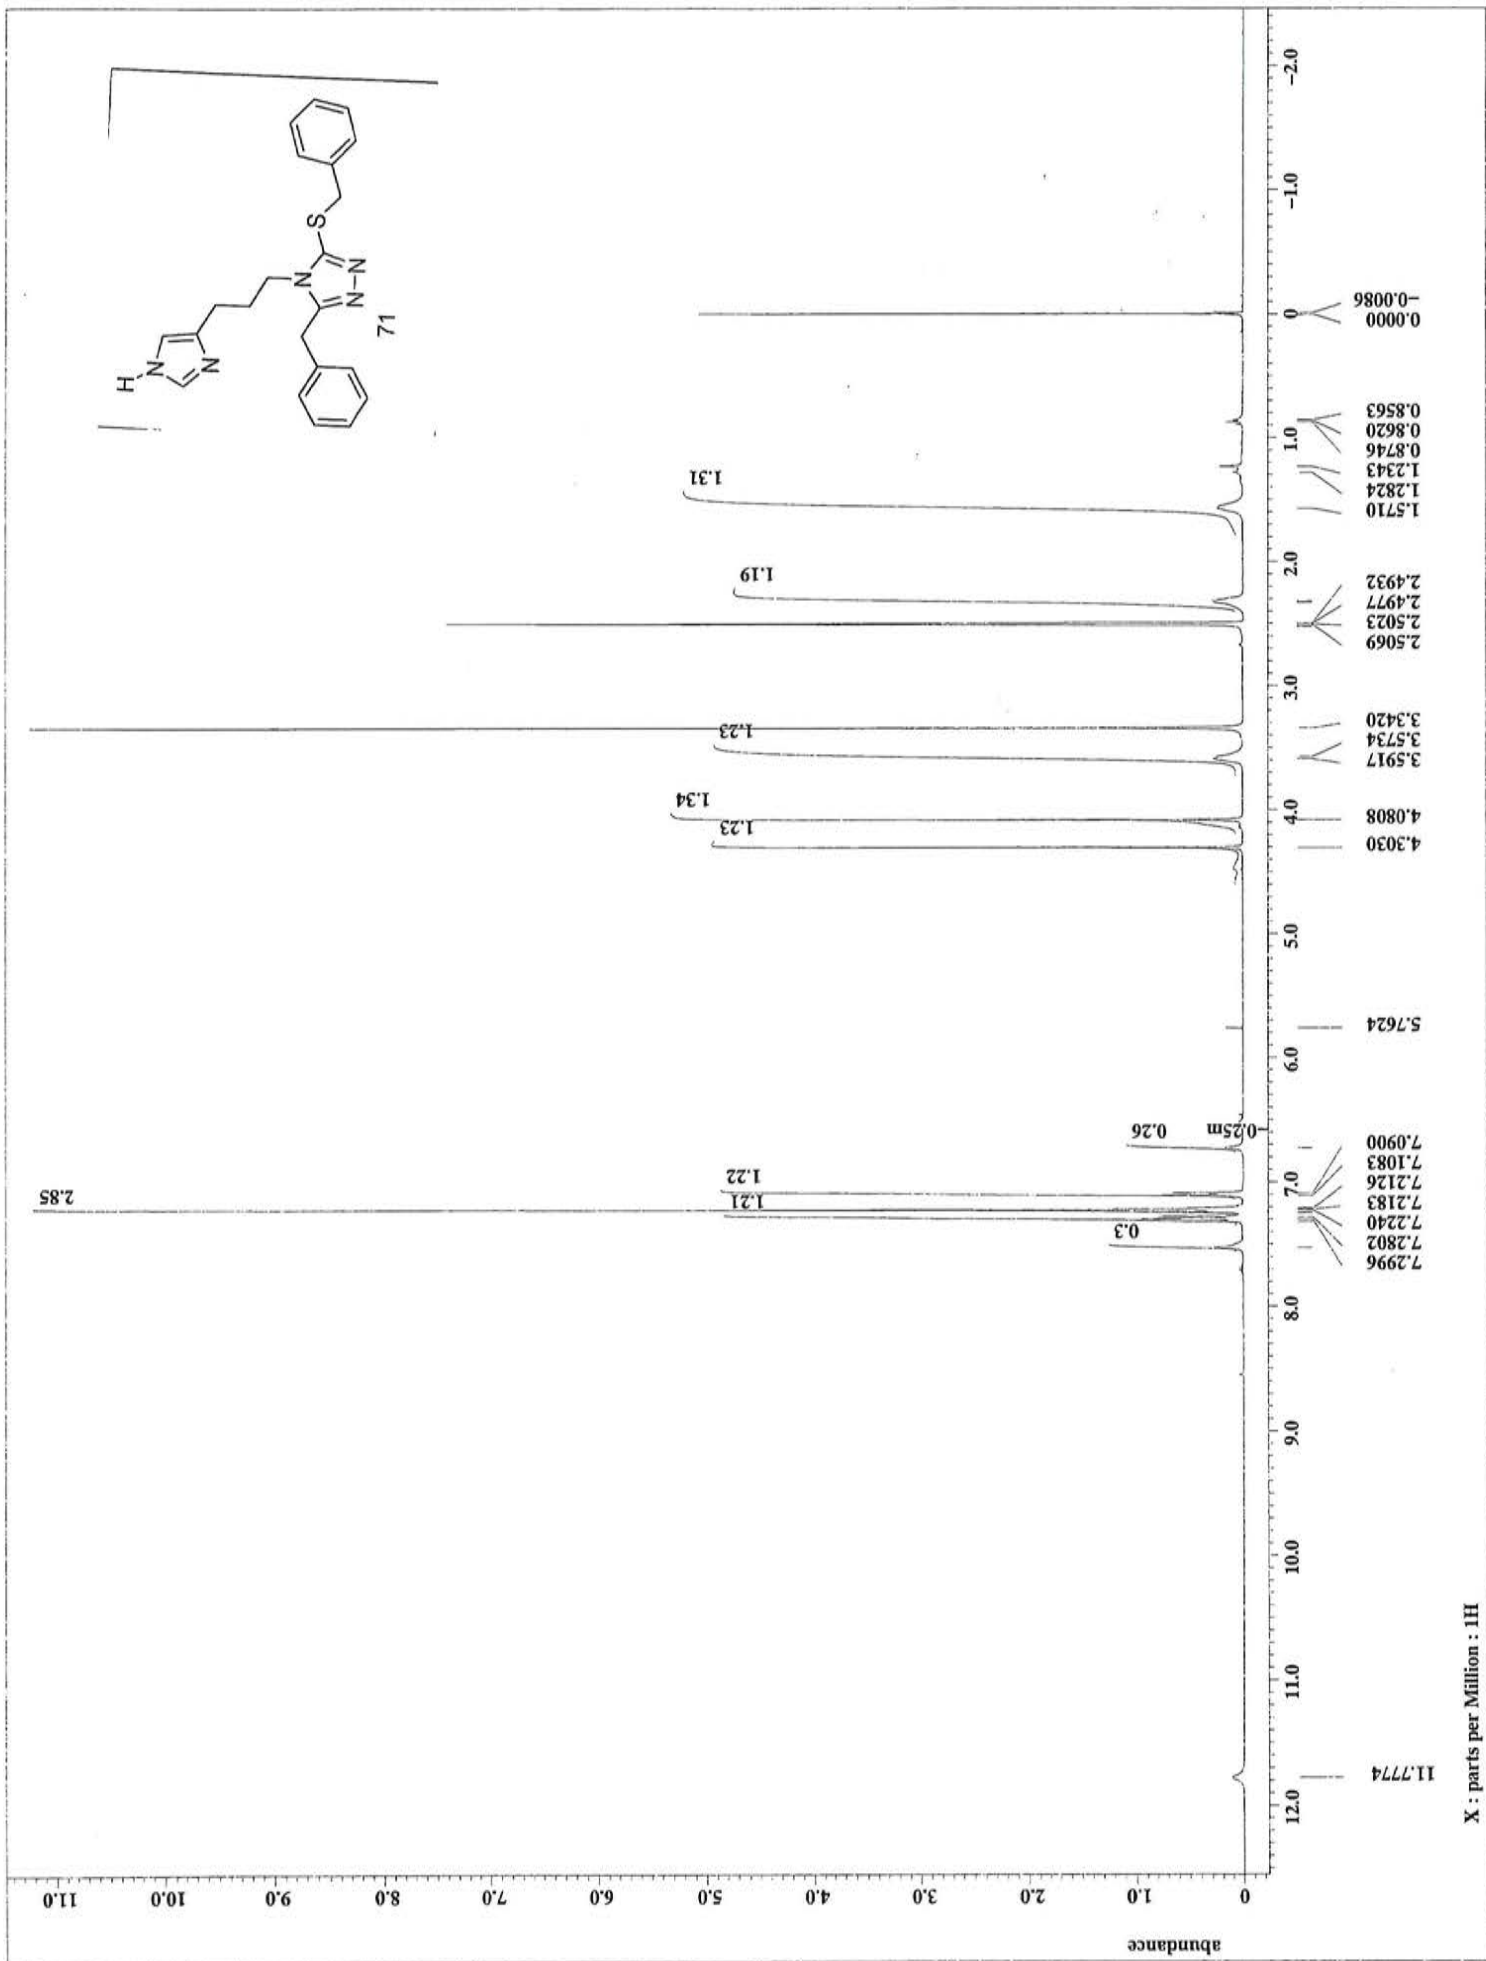

Filer  
 Authc  
 Exper  
 Sampl  
 Solv  
 Creat  
 Revis  
 Curre

72

Data\_format = 1D COMPLEX  
 Dim\_size = 13107  
 Dim\_title = 1H  
 Dim\_units = [ppm]  
 Dimensions = X  
 Site = ECS 400  
 Spectrometer = JNM-ECS400

Field\_strength = 9.389766[T] (400 [MHz])  
 X\_acq\_duration = 2.18365952[s]  
 X\_domain = 1H  
 X\_freq = 399.78219838 [MHz]  
 X\_offset = 5 [ppm]  
 X\_points = 16384  
 X\_prescans = 1  
 X\_resolution = 0.45794685 [Hz]  
 X\_sweep = 7.5030012 [kHz]  
 Irr\_domain = 1H  
 Irr\_freq = 399.78219838 [MHz]  
 Irr\_offset = 5 [ppm]  
 Tri\_domain = 1H  
 Tri\_freq = 399.78219838 [MHz]  
 Tri\_offset = 5 [ppm]  
 Clipped = FALSE  
 Mod\_return = 1  
 Scans = 64  
 Total\_scans = 64

X\_90\_width = 10.65 [us]  
 X\_acq\_time = 2.18365952[s]  
 X\_angle = 45 [deg]  
 X\_atn = 6 [dB]  
 X\_pulse = 5.325 [us]  
 Irr\_mode = Off  
 Tri\_mode = Off  
 Dante\_presat = FALSE  
 Initial\_wait = 1 [s]  
 Recvr\_gain = 46  
 Relaxation\_delay = 4 [s]  
 Repetition\_time = 6.18365952[s]  
 Temp\_get = 19 [dC]

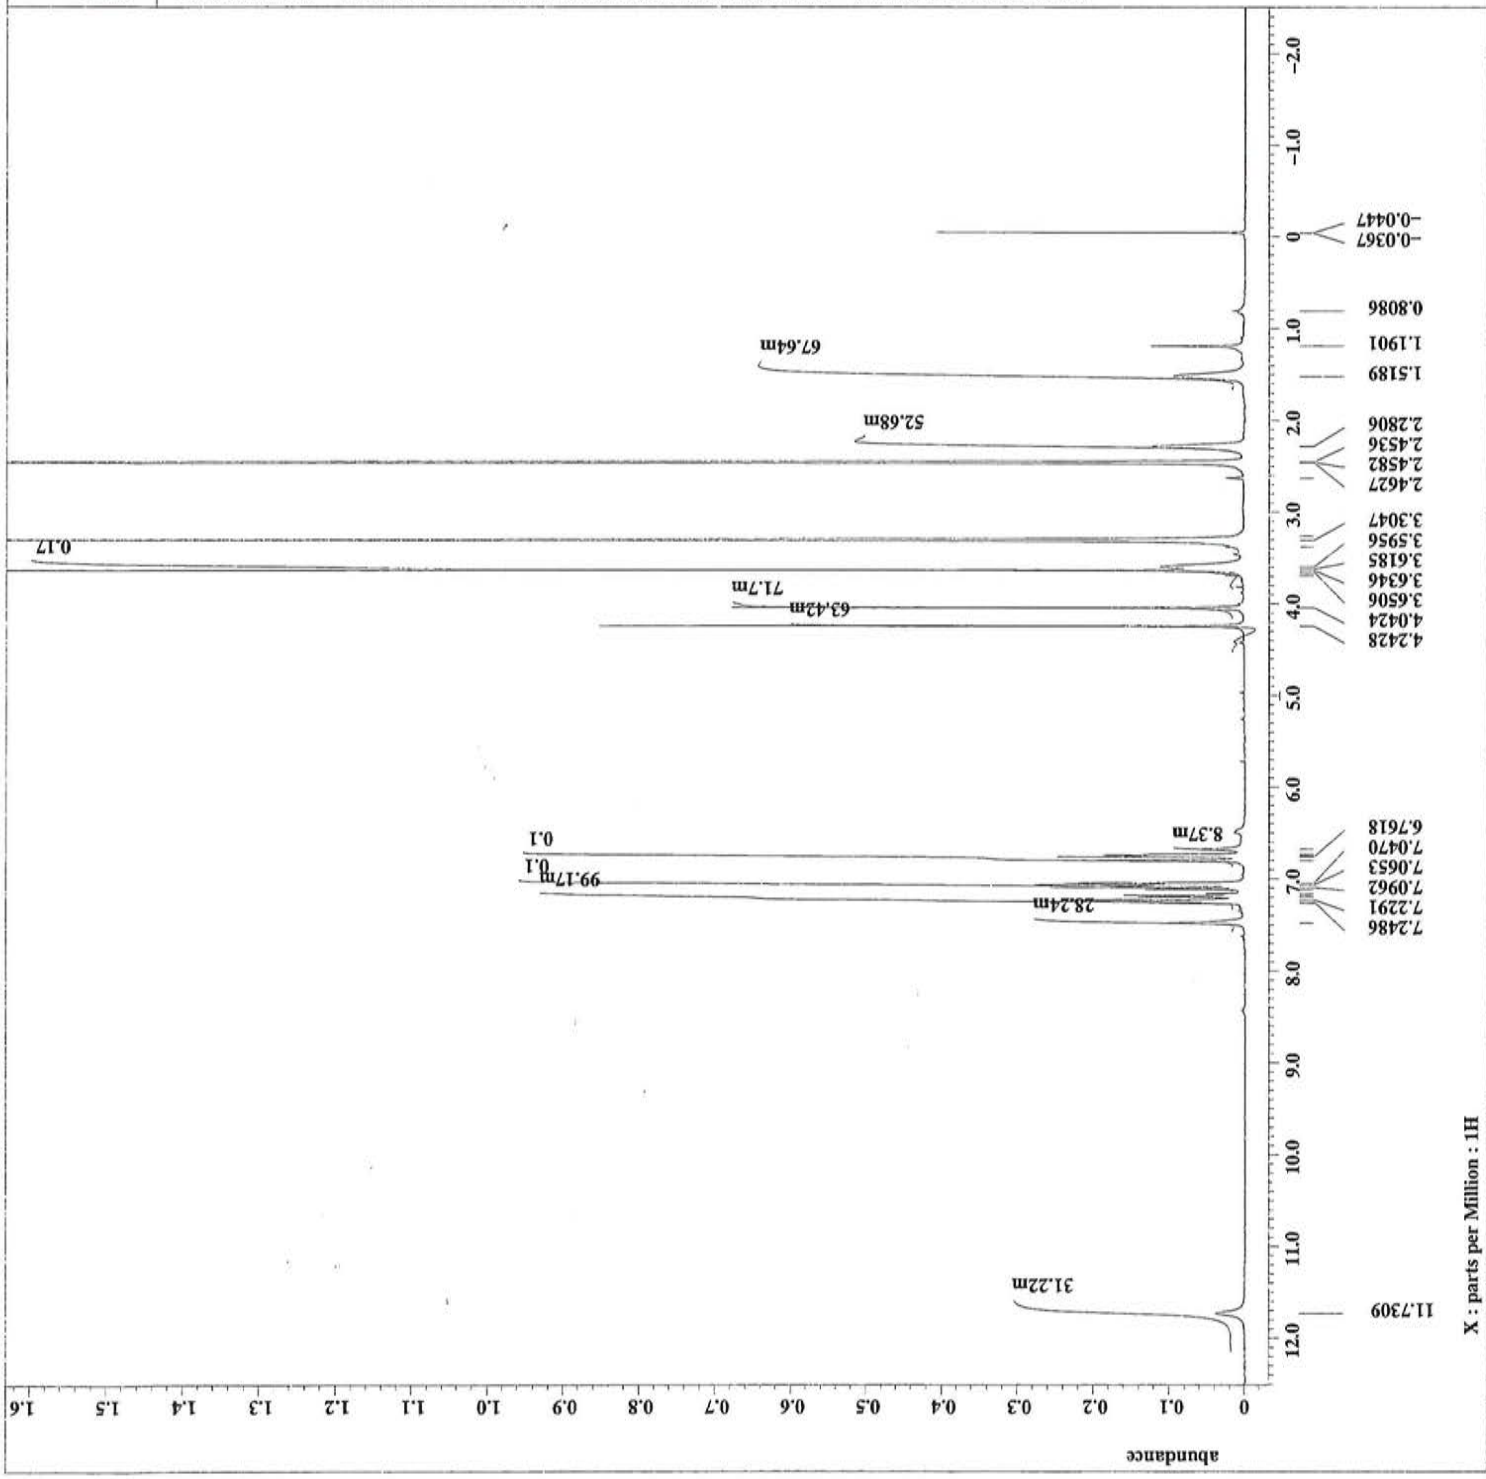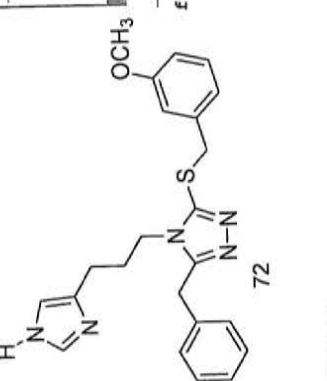

X : parts per Million : 1H

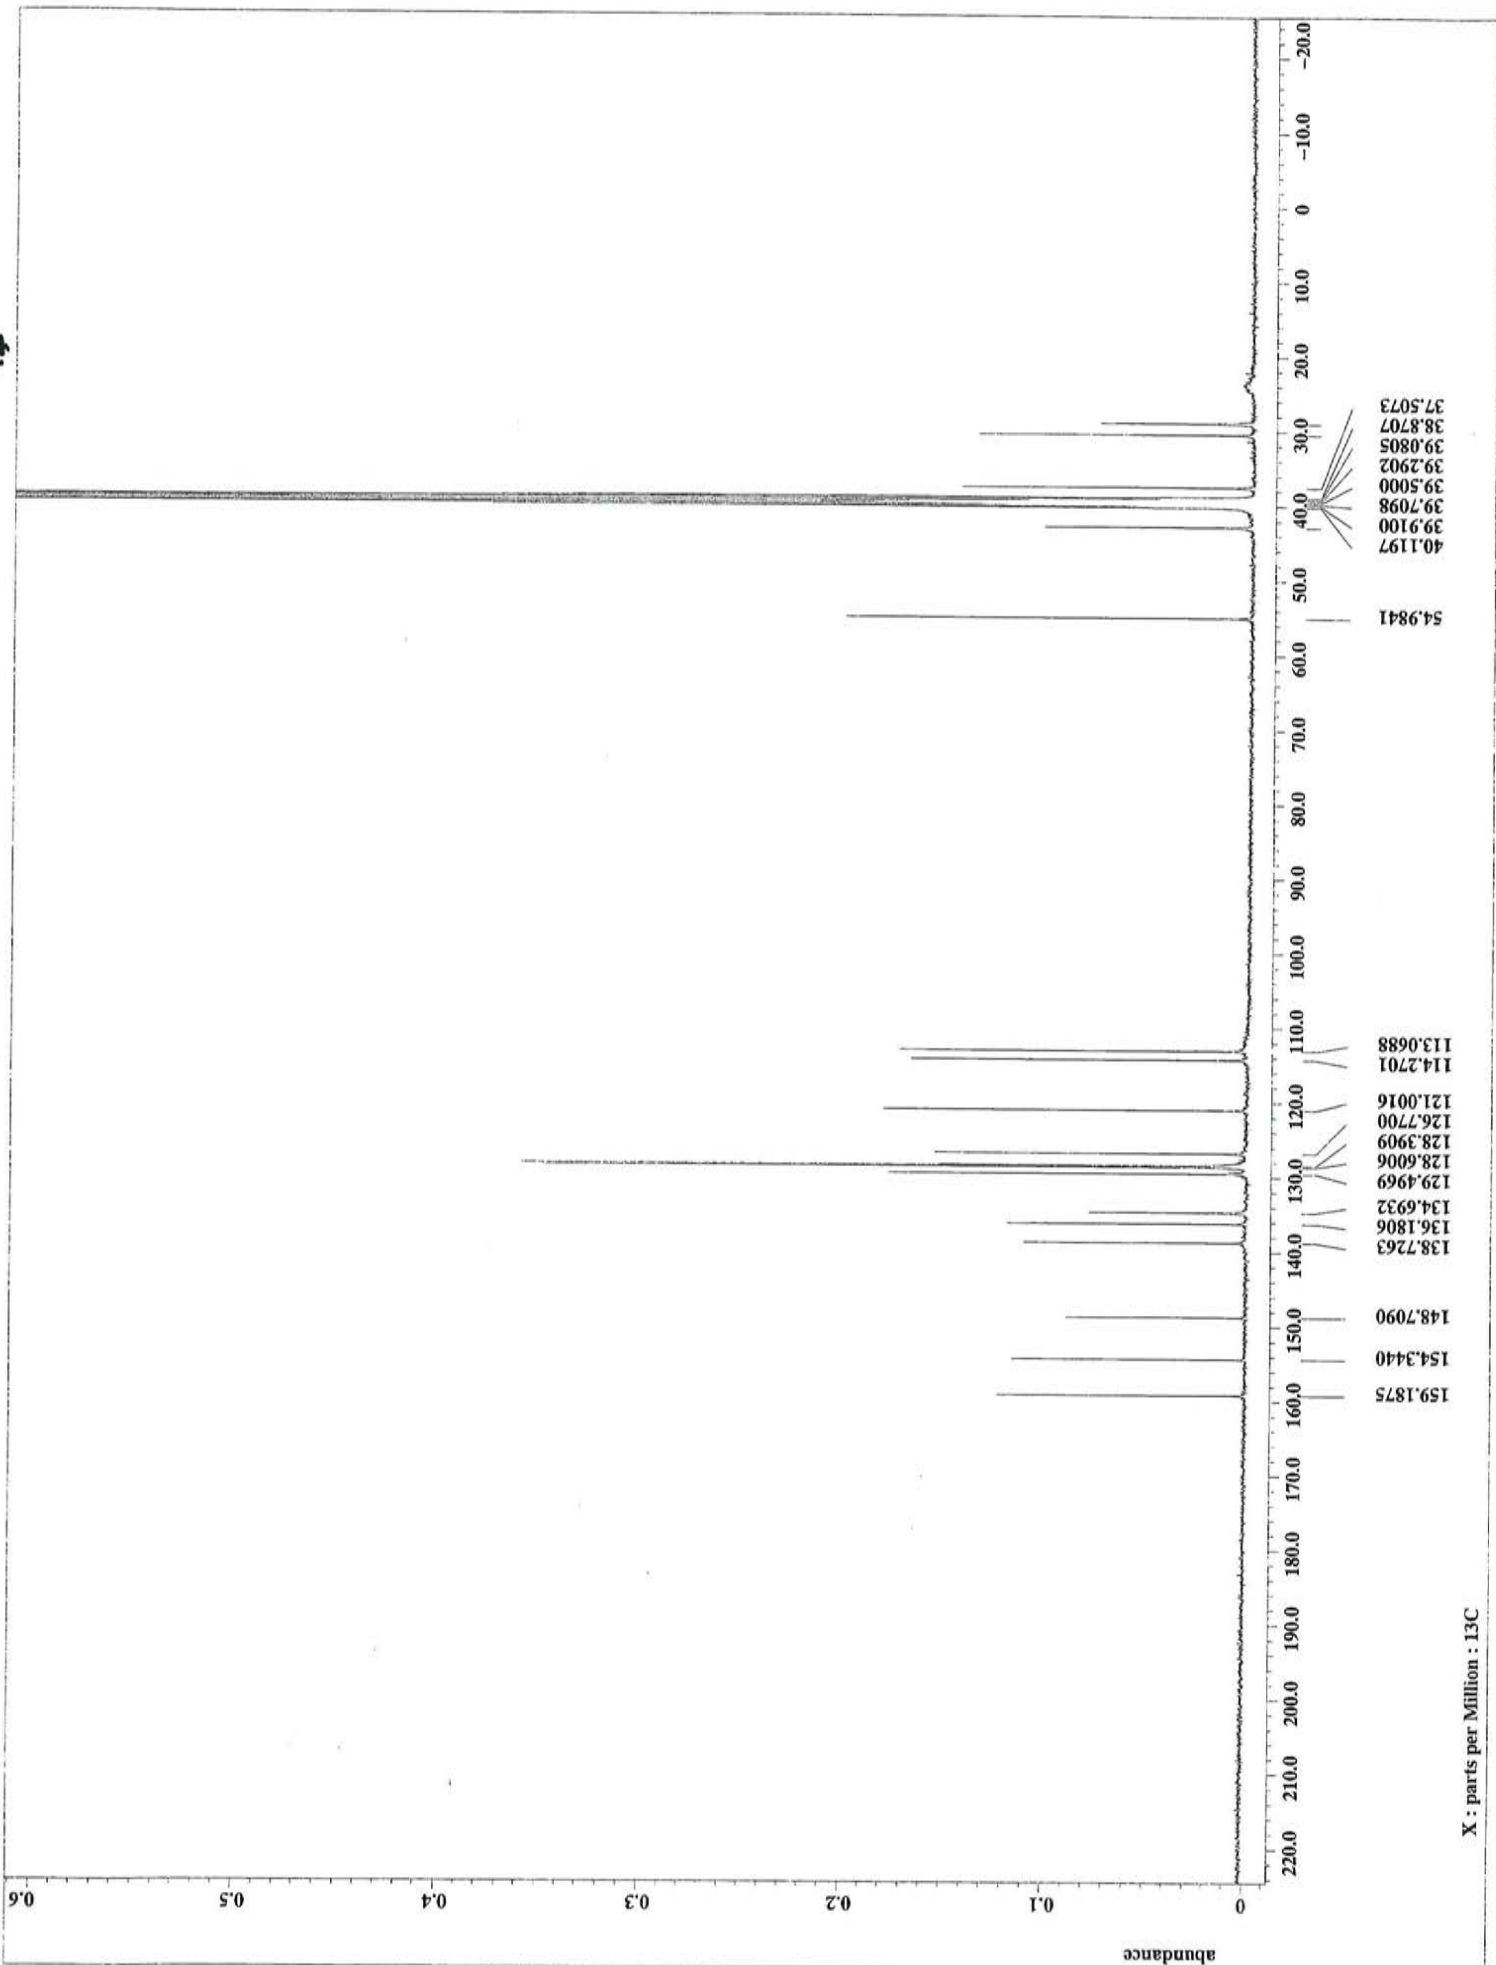

X : parts per Million : 13C

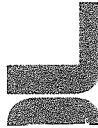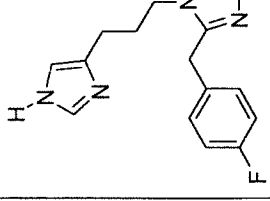

Current\_time = 18-JUL-2024 09:30:07  
 08:48:55  
 09:29:35

Comment = single\_pulse  
 Data\_format = 1D COMPLEX  
 Dim\_size = 13107  
 Dim\_title = 1H  
 Dim\_units = [ppm]  
 Dimensions = X  
 Site = ECS 400  
 Spectrometer = JNM-ECS400  
 Field\_strength = 9.399766 [T] (400 [MHz])  
 X\_acq\_duration = 2.18365952 [s]  
 X\_domain = 1H  
 X\_freq = 399.78219838 [MHz]  
 X\_offset = 5 [ppm]  
 X\_points = 16384  
 X\_prescans = 1  
 X\_resolution = 0.45794685 [Hz]  
 X\_sweep = 7.5030012 [KHz]  
 Irr\_domain = 1H  
 Irr\_freq = 399.78219838 [MHz]  
 Irr\_offset = 5 [ppm]  
 Tri\_domain = 1H  
 Tri\_freq = 399.78219838 [MHz]  
 Tri\_offset = 5 [ppm]  
 Clipped = TRUE  
 Mod\_return = 1  
 Scans = 8  
 Total\_scans = 8  
 X\_90\_width = 10.65 [us]  
 X\_acq\_time = 2.18365952 [s]  
 X\_angle = 45 [deg]  
 X\_atn = 6 [dB]  
 X\_pulse = 5.325 [us]  
 Irr\_mode = Off  
 Tri\_mode = Off  
 Dante\_preset = FALSE  
 Initial\_wait = 1 [s]  
 Recvr\_gain = 50  
 Relaxation\_delay = 5 [s]  
 Repetition\_time = 7.18365952 [s]  
 Temp\_get = 20 [dC]

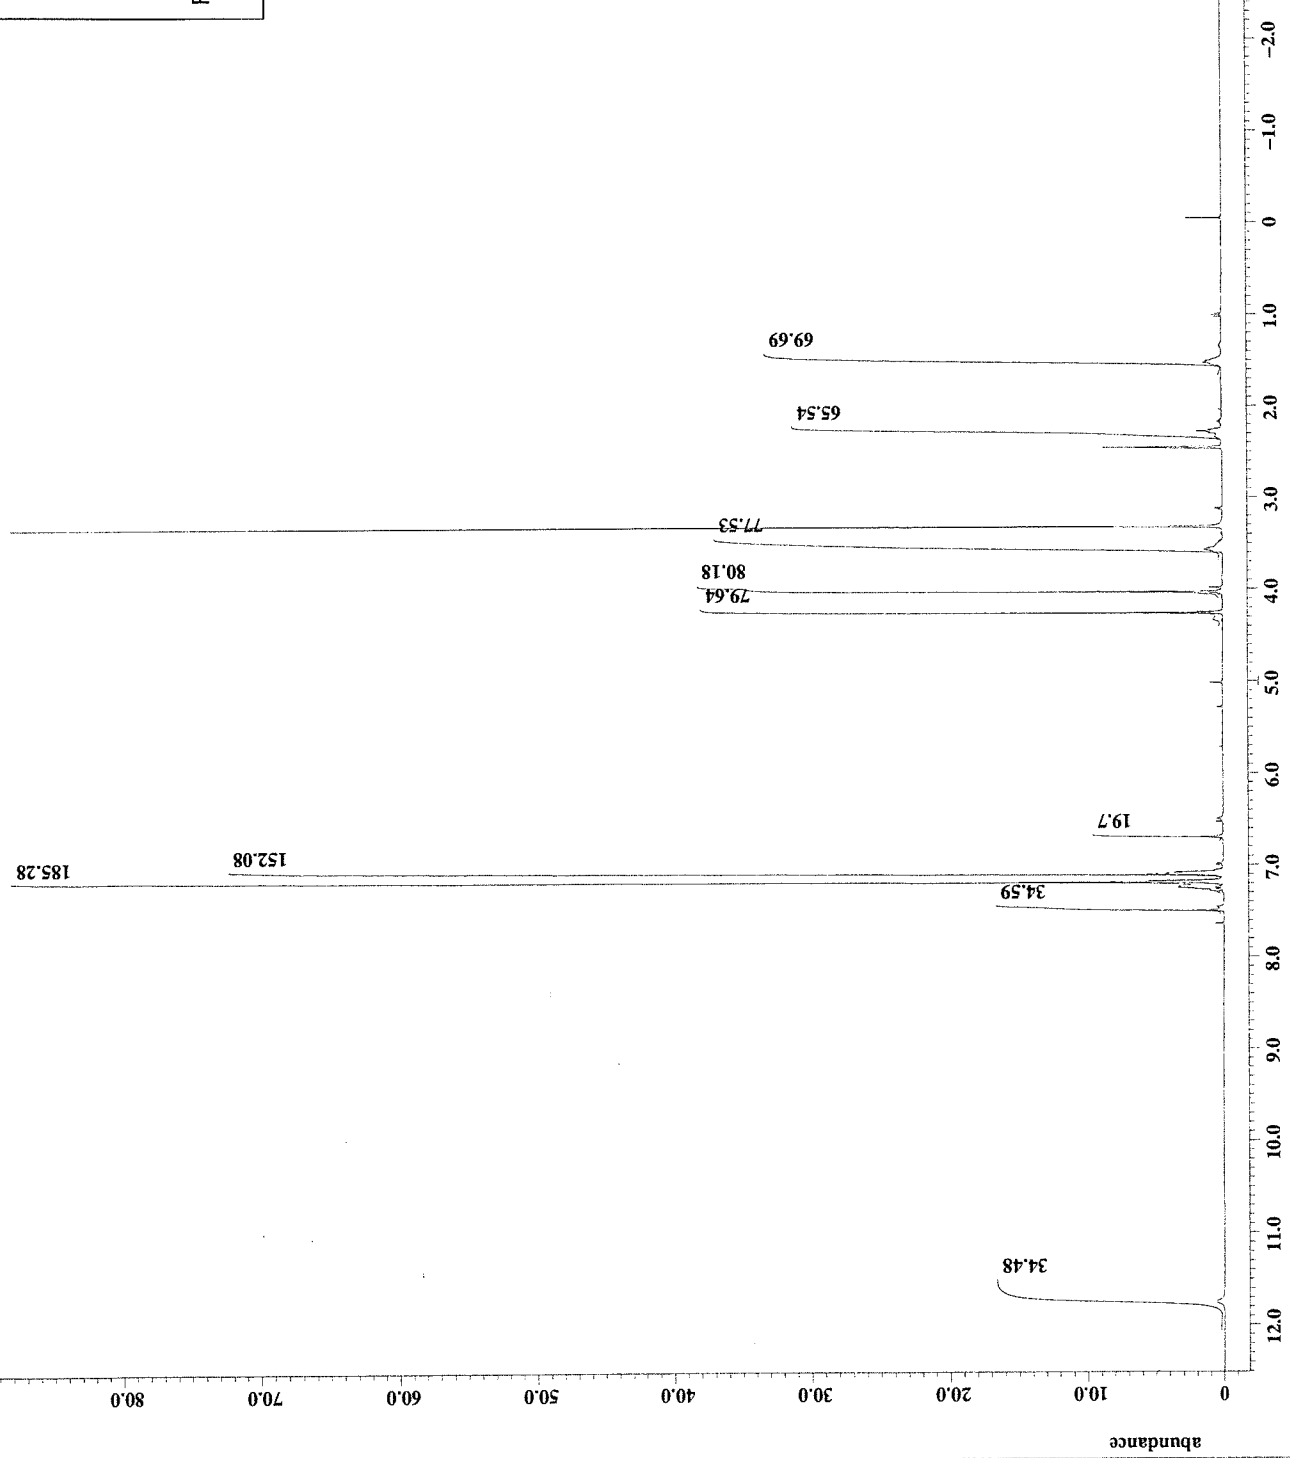

X : parts per Million : 1H

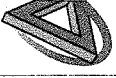

File no  
Author  
Experi  
Sample  
Solver  
Creati  
Revisi  
Current\_time

73

= 18-JUL-2024 09:30:36

Comment = single\_pulse  
Data\_format = 1D COMPLEX  
Dim\_size = 13107  
Dim\_title = 1H  
Dim\_units = [ppm]  
Dimensions = X  
Site = ECS 400  
Spectrometer = JNM-ECS400  
Field\_strength = 9.389766[T] (400 [MHz])  
X\_acq\_duration = 2.18365952[s]  
X\_domain = 1H  
X\_freq = 399.78219838 [MHz]  
X\_offset = 5 [ppm]  
X\_points = 16384  
X\_prescans = 1  
X\_resolution = 0.45794685 [Hz]  
X\_sweep = 7.5030012 [kHz]  
Irr\_domain = 1H  
Irr\_freq = 399.78219838 [MHz]  
Irr\_offset = 5 [ppm]  
Tri\_domain = 1H  
Tri\_freq = 399.78219838 [MHz]  
Tri\_offset = 5 [ppm]  
Clipped = TRUE  
Mod\_return = 1  
Scans = 8  
Total\_scans = 8  
X\_90\_width = 10.65 [us]  
X\_acq\_time = 2.18365952 [s]  
X\_angle = 45 [deg]  
X\_atn = 6 [dB]  
X\_pulse = 5.325 [us]  
Irr\_mode = Off  
Tri\_mode = Off  
Dante\_presat = FALSE  
Initial\_wait = 1 [s]  
Recvr\_gain = 50  
Relaxation\_delay = 5 [s]  
Repetition\_time = 7.18365952 [s]  
Temp\_get = 20 [dC]

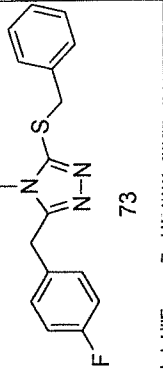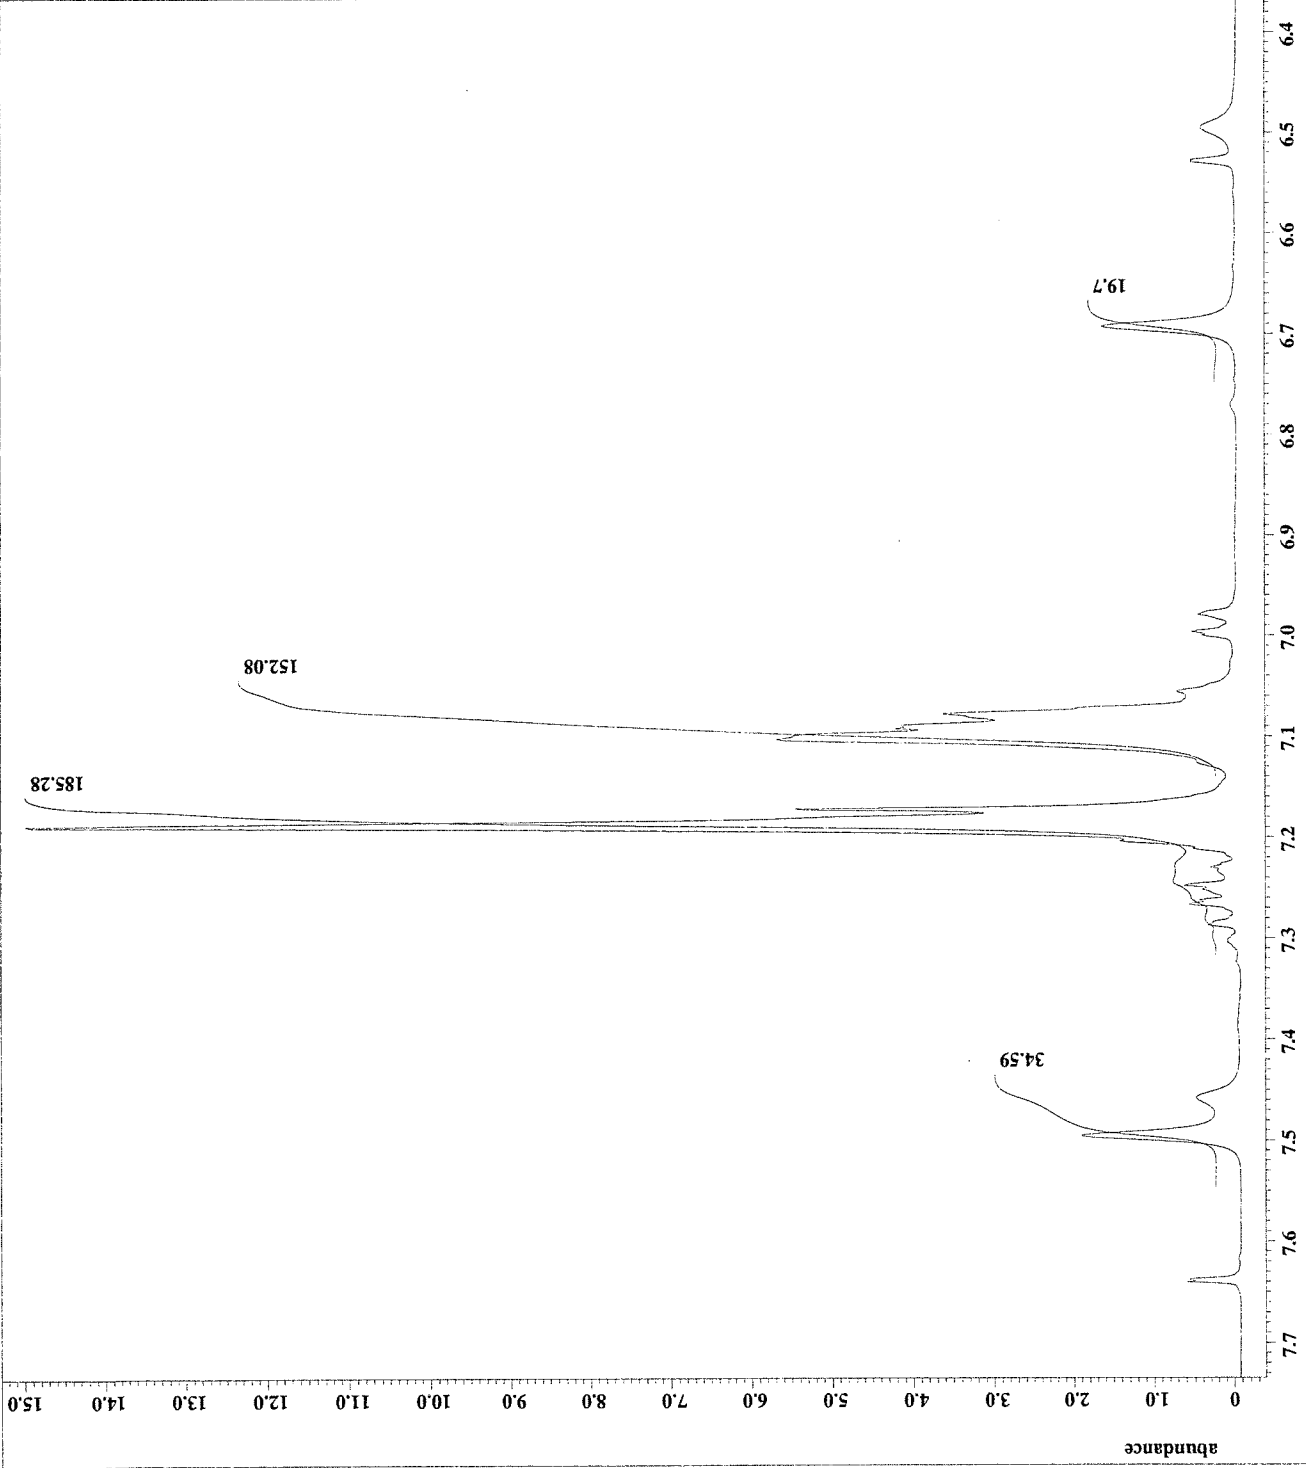

X : parts per Million : 1H

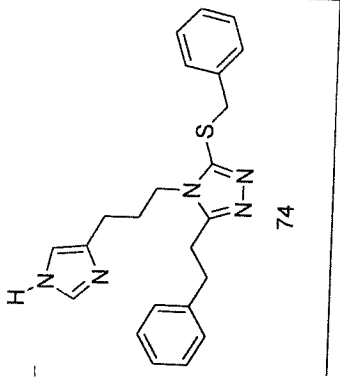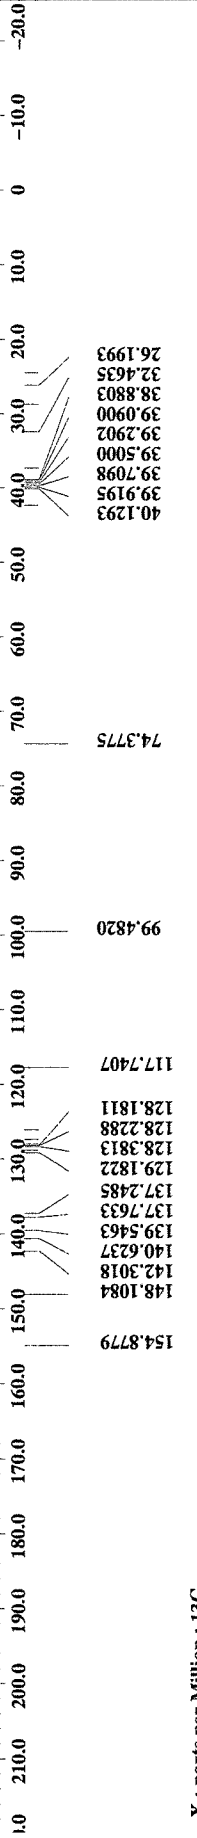

X : parts per Million : 13C

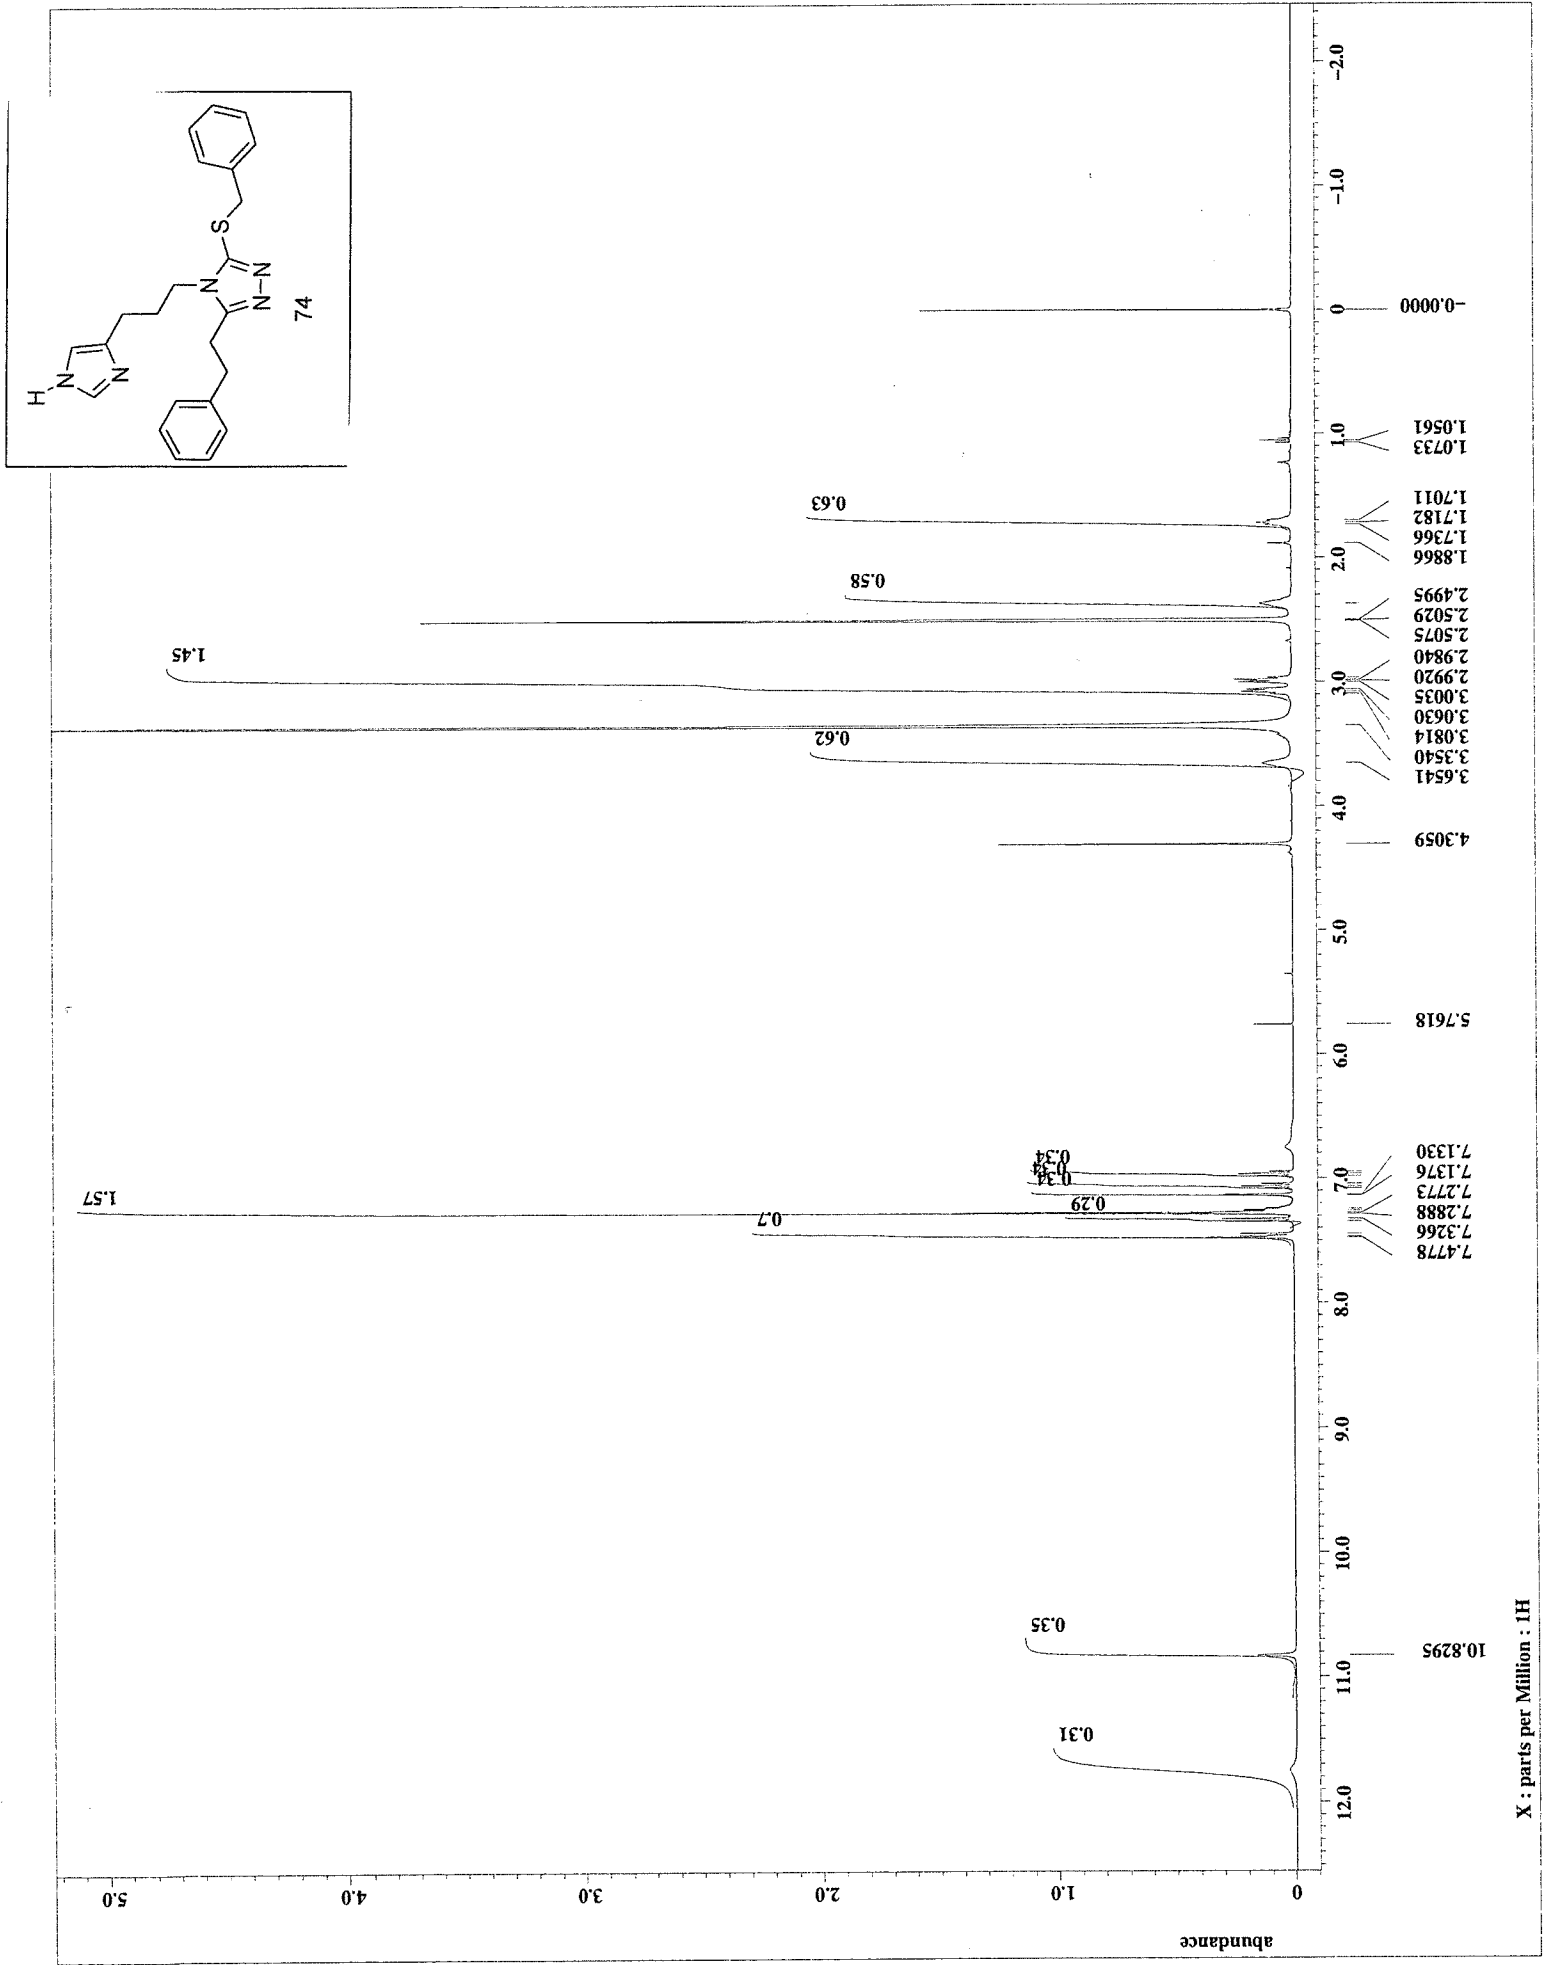

X : parts per Million : 1H



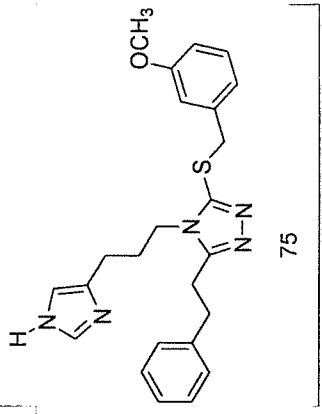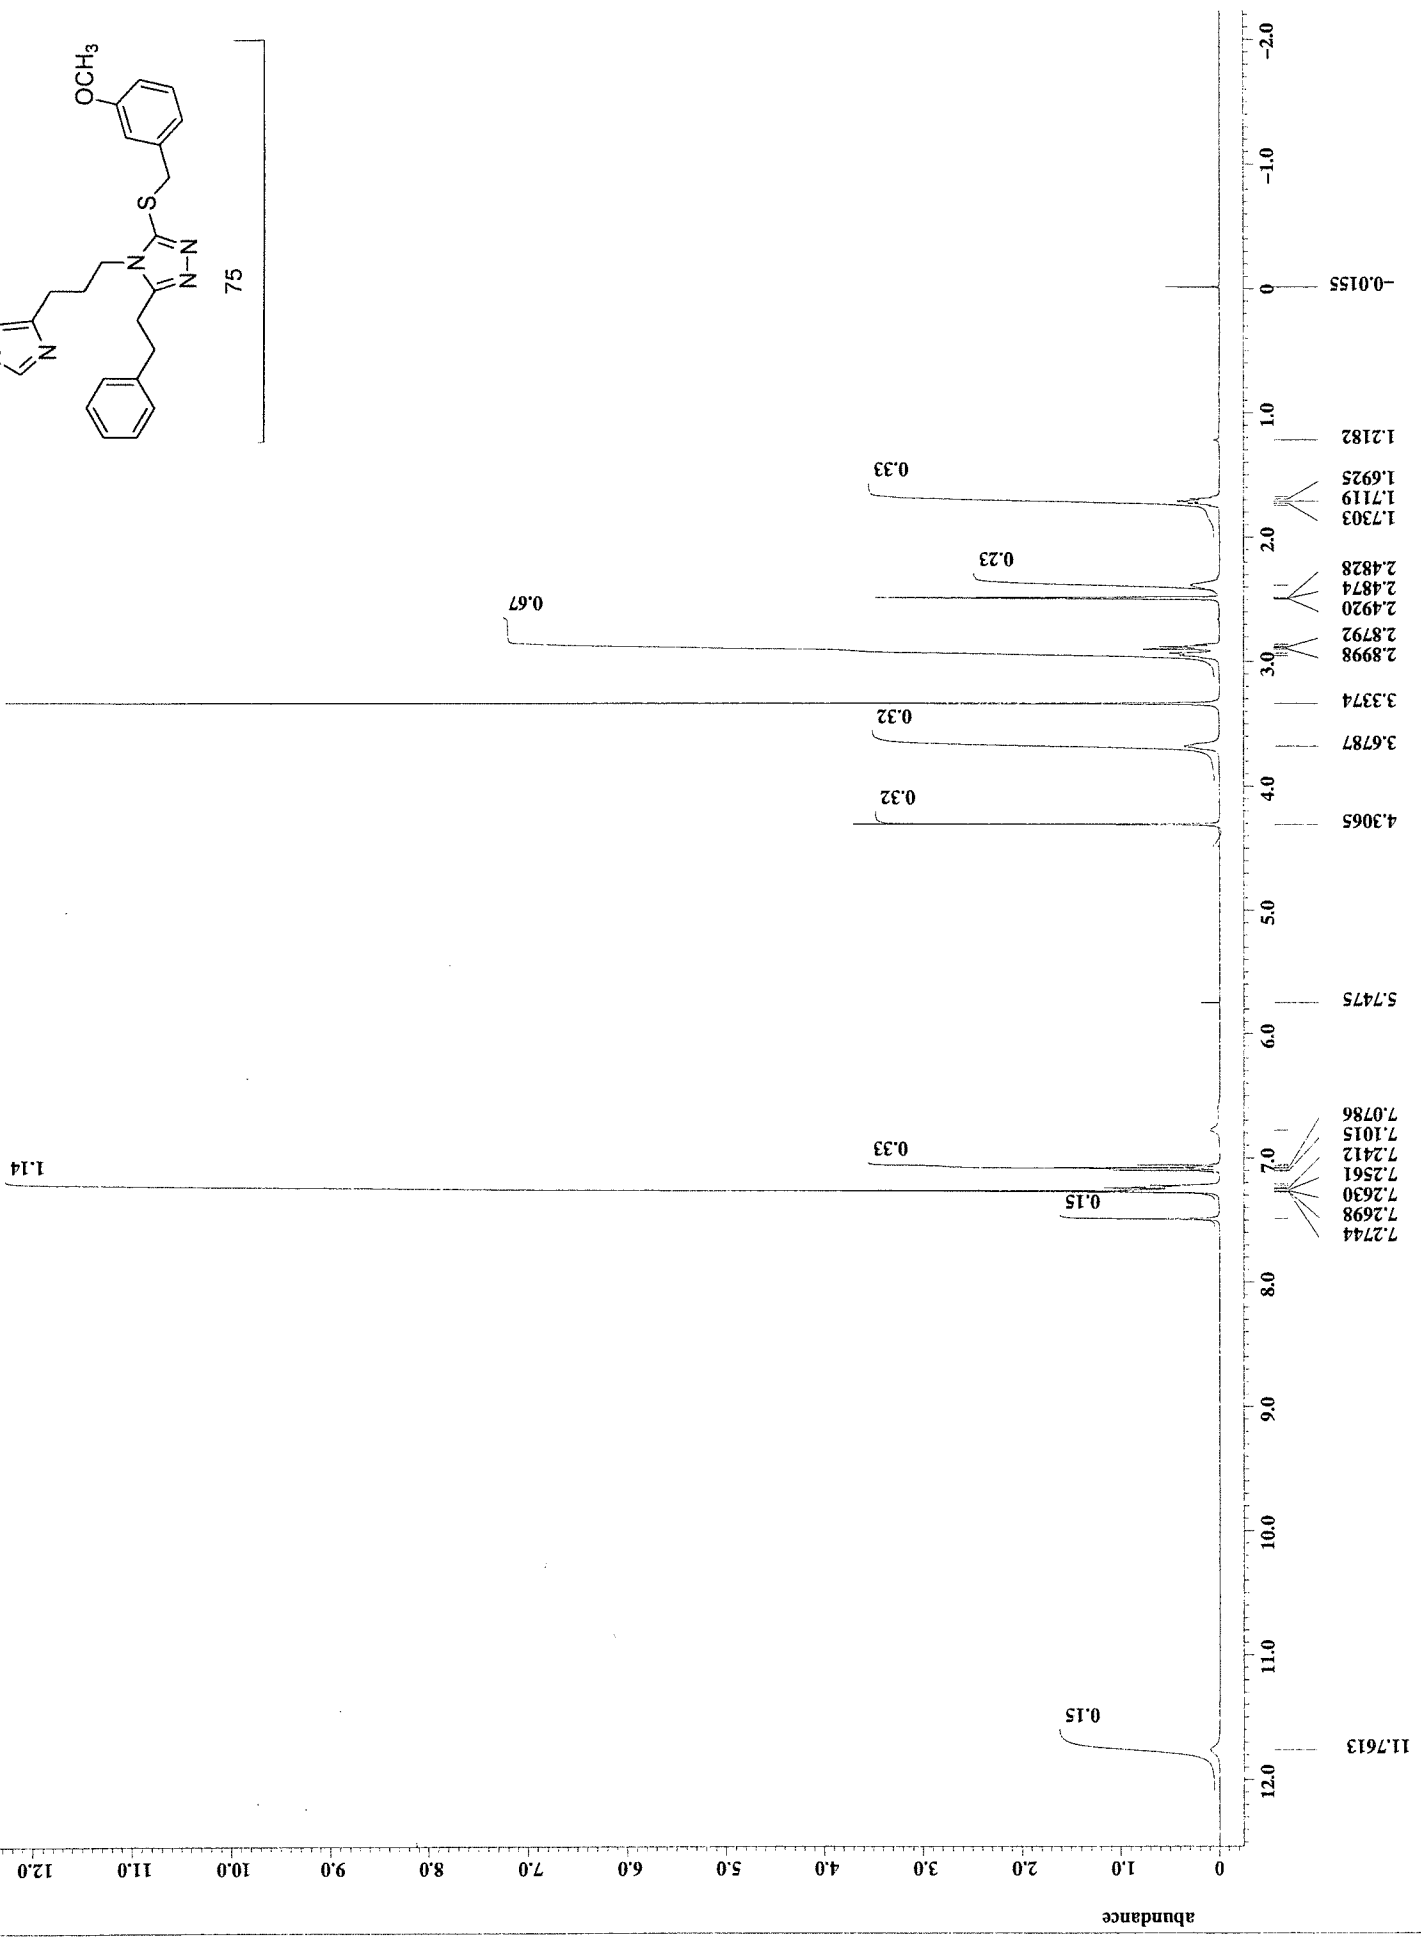

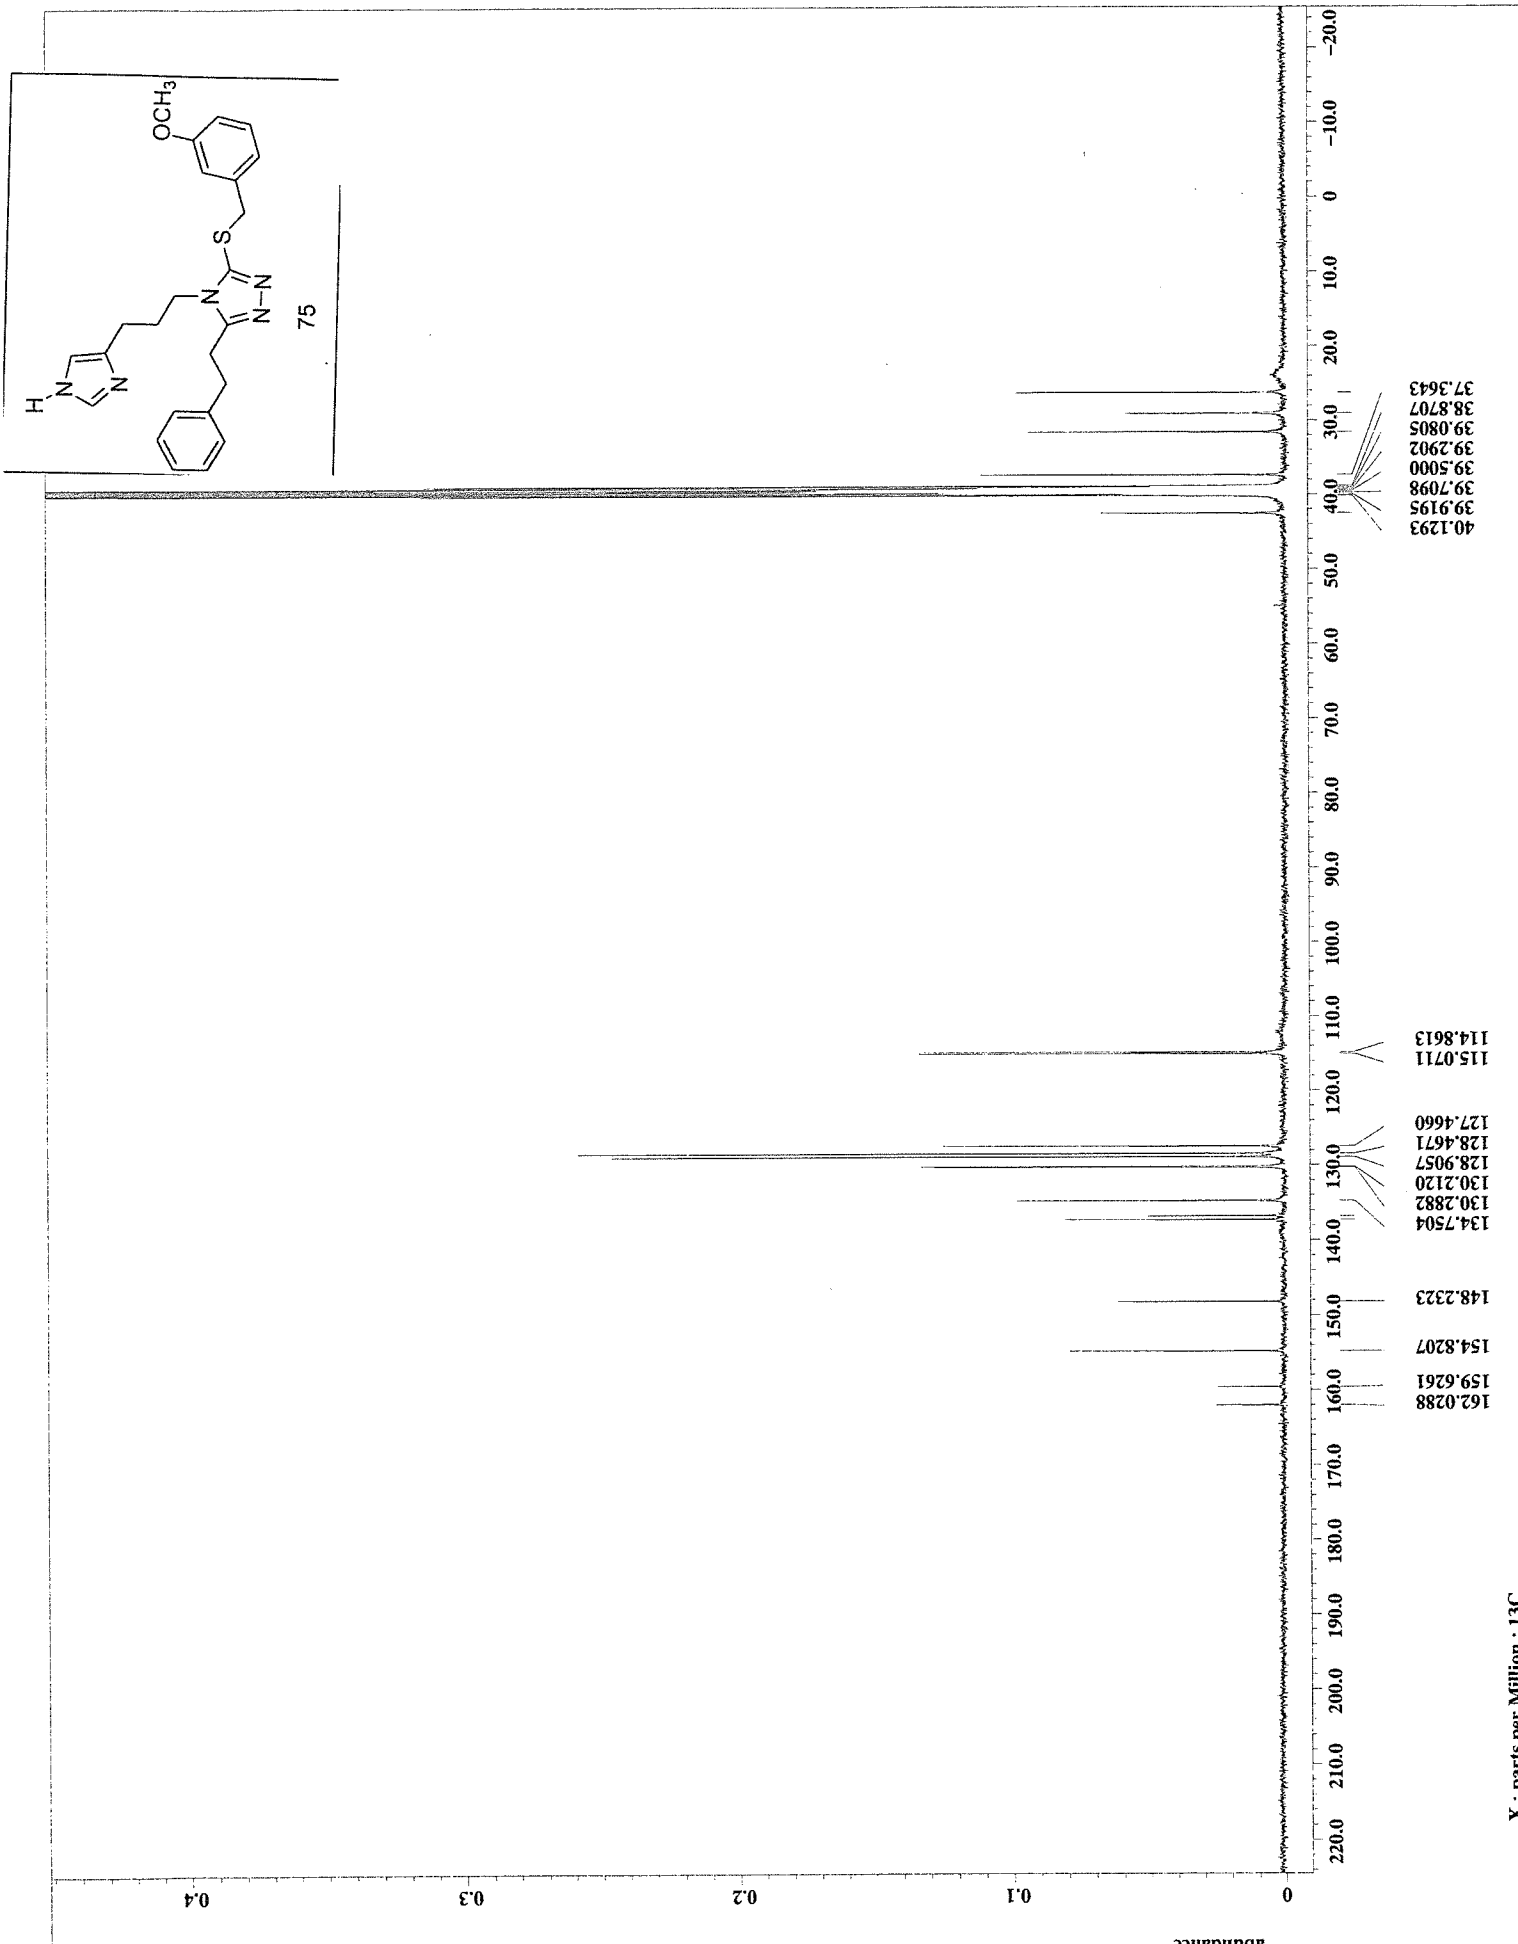

X : parts per Million : 13C

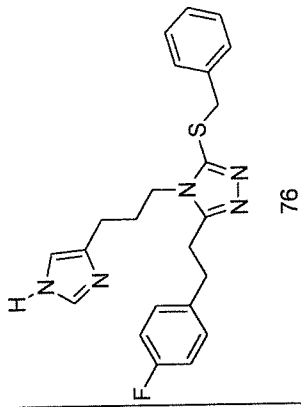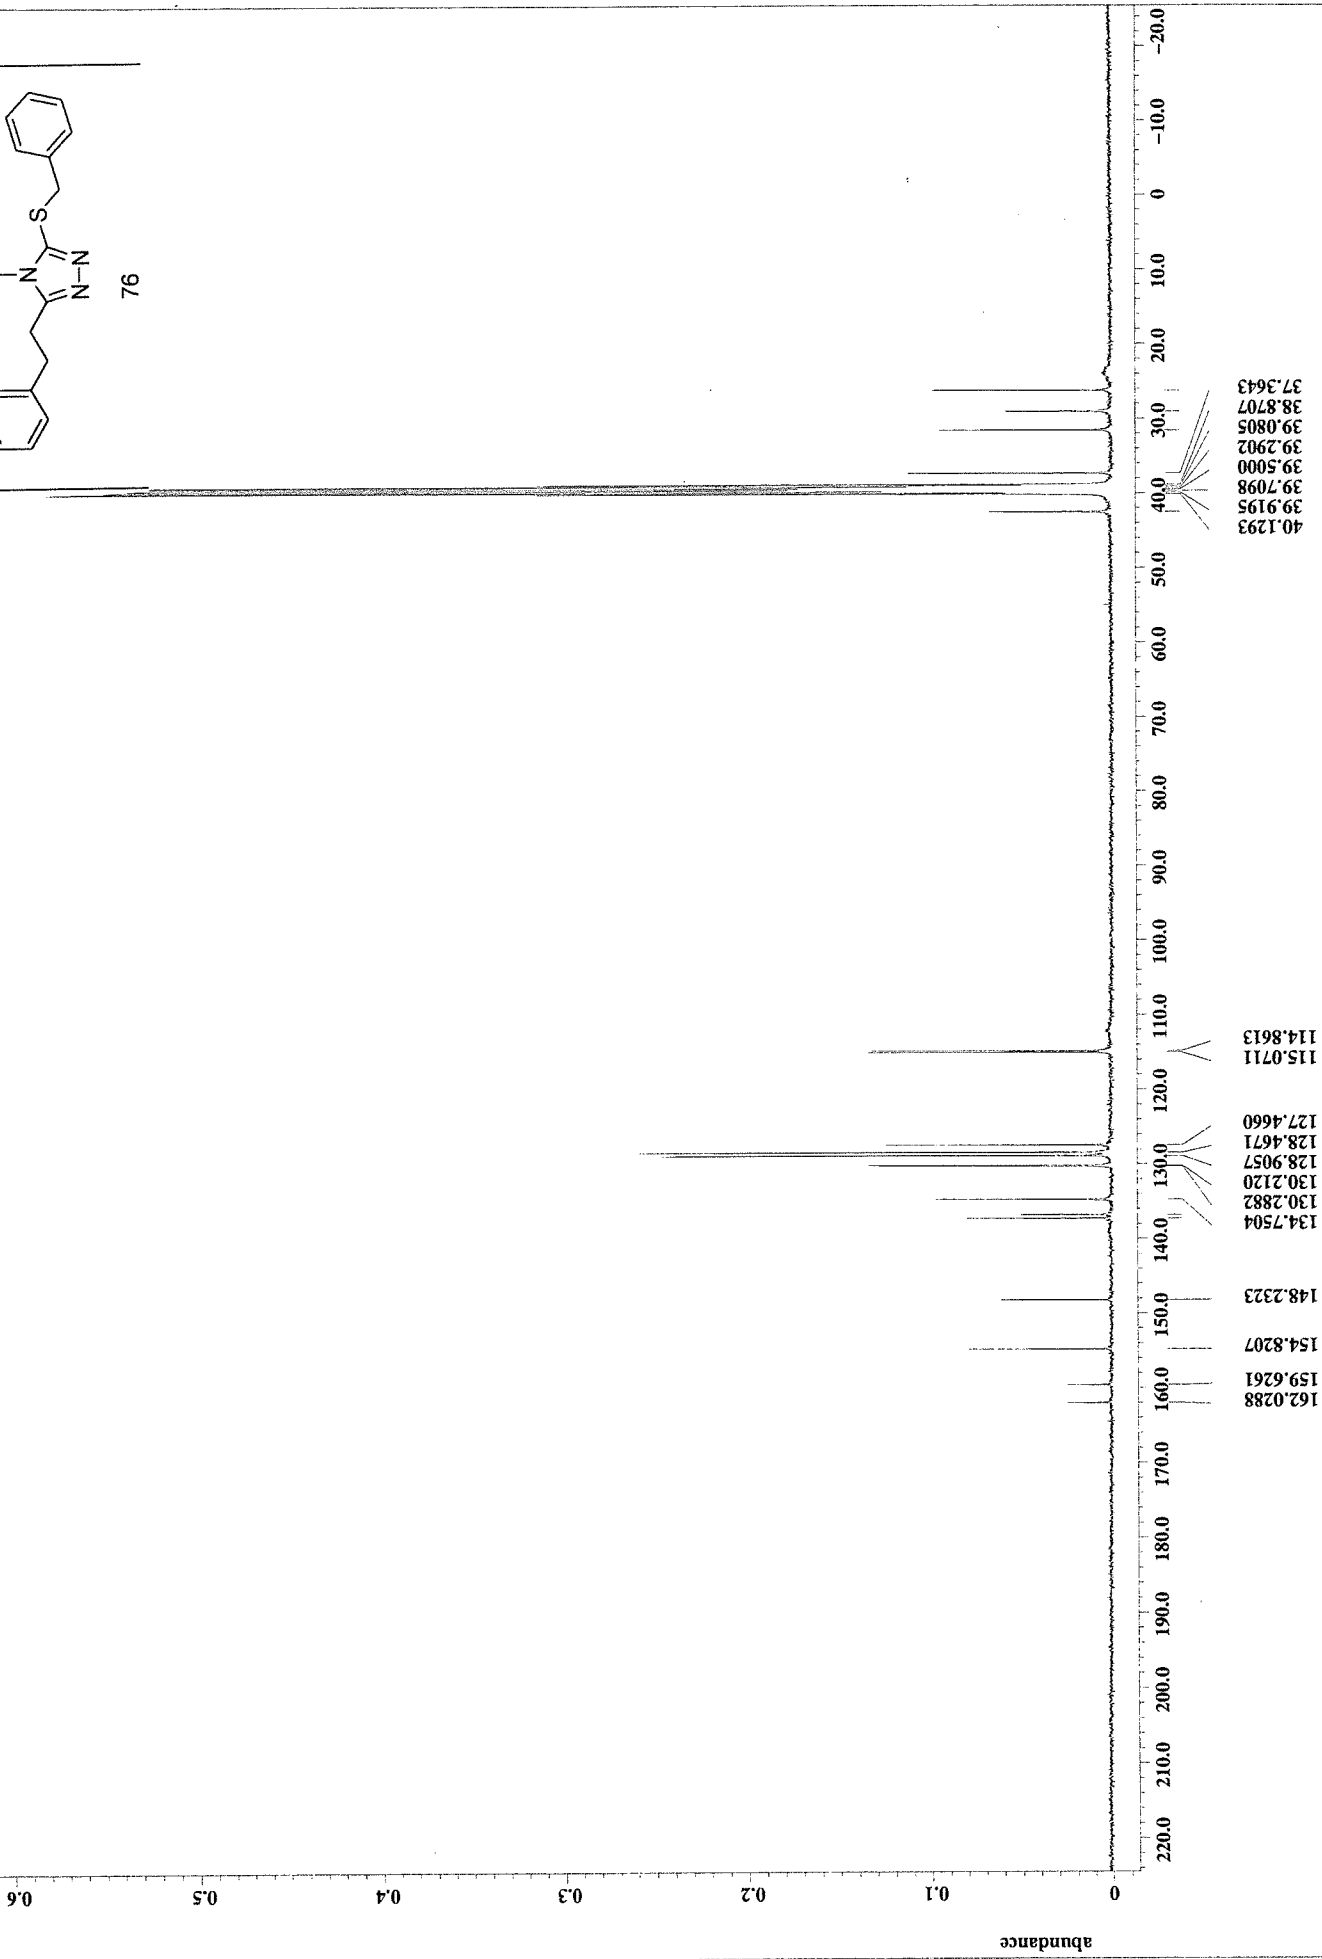

X : parts per Million : 13C

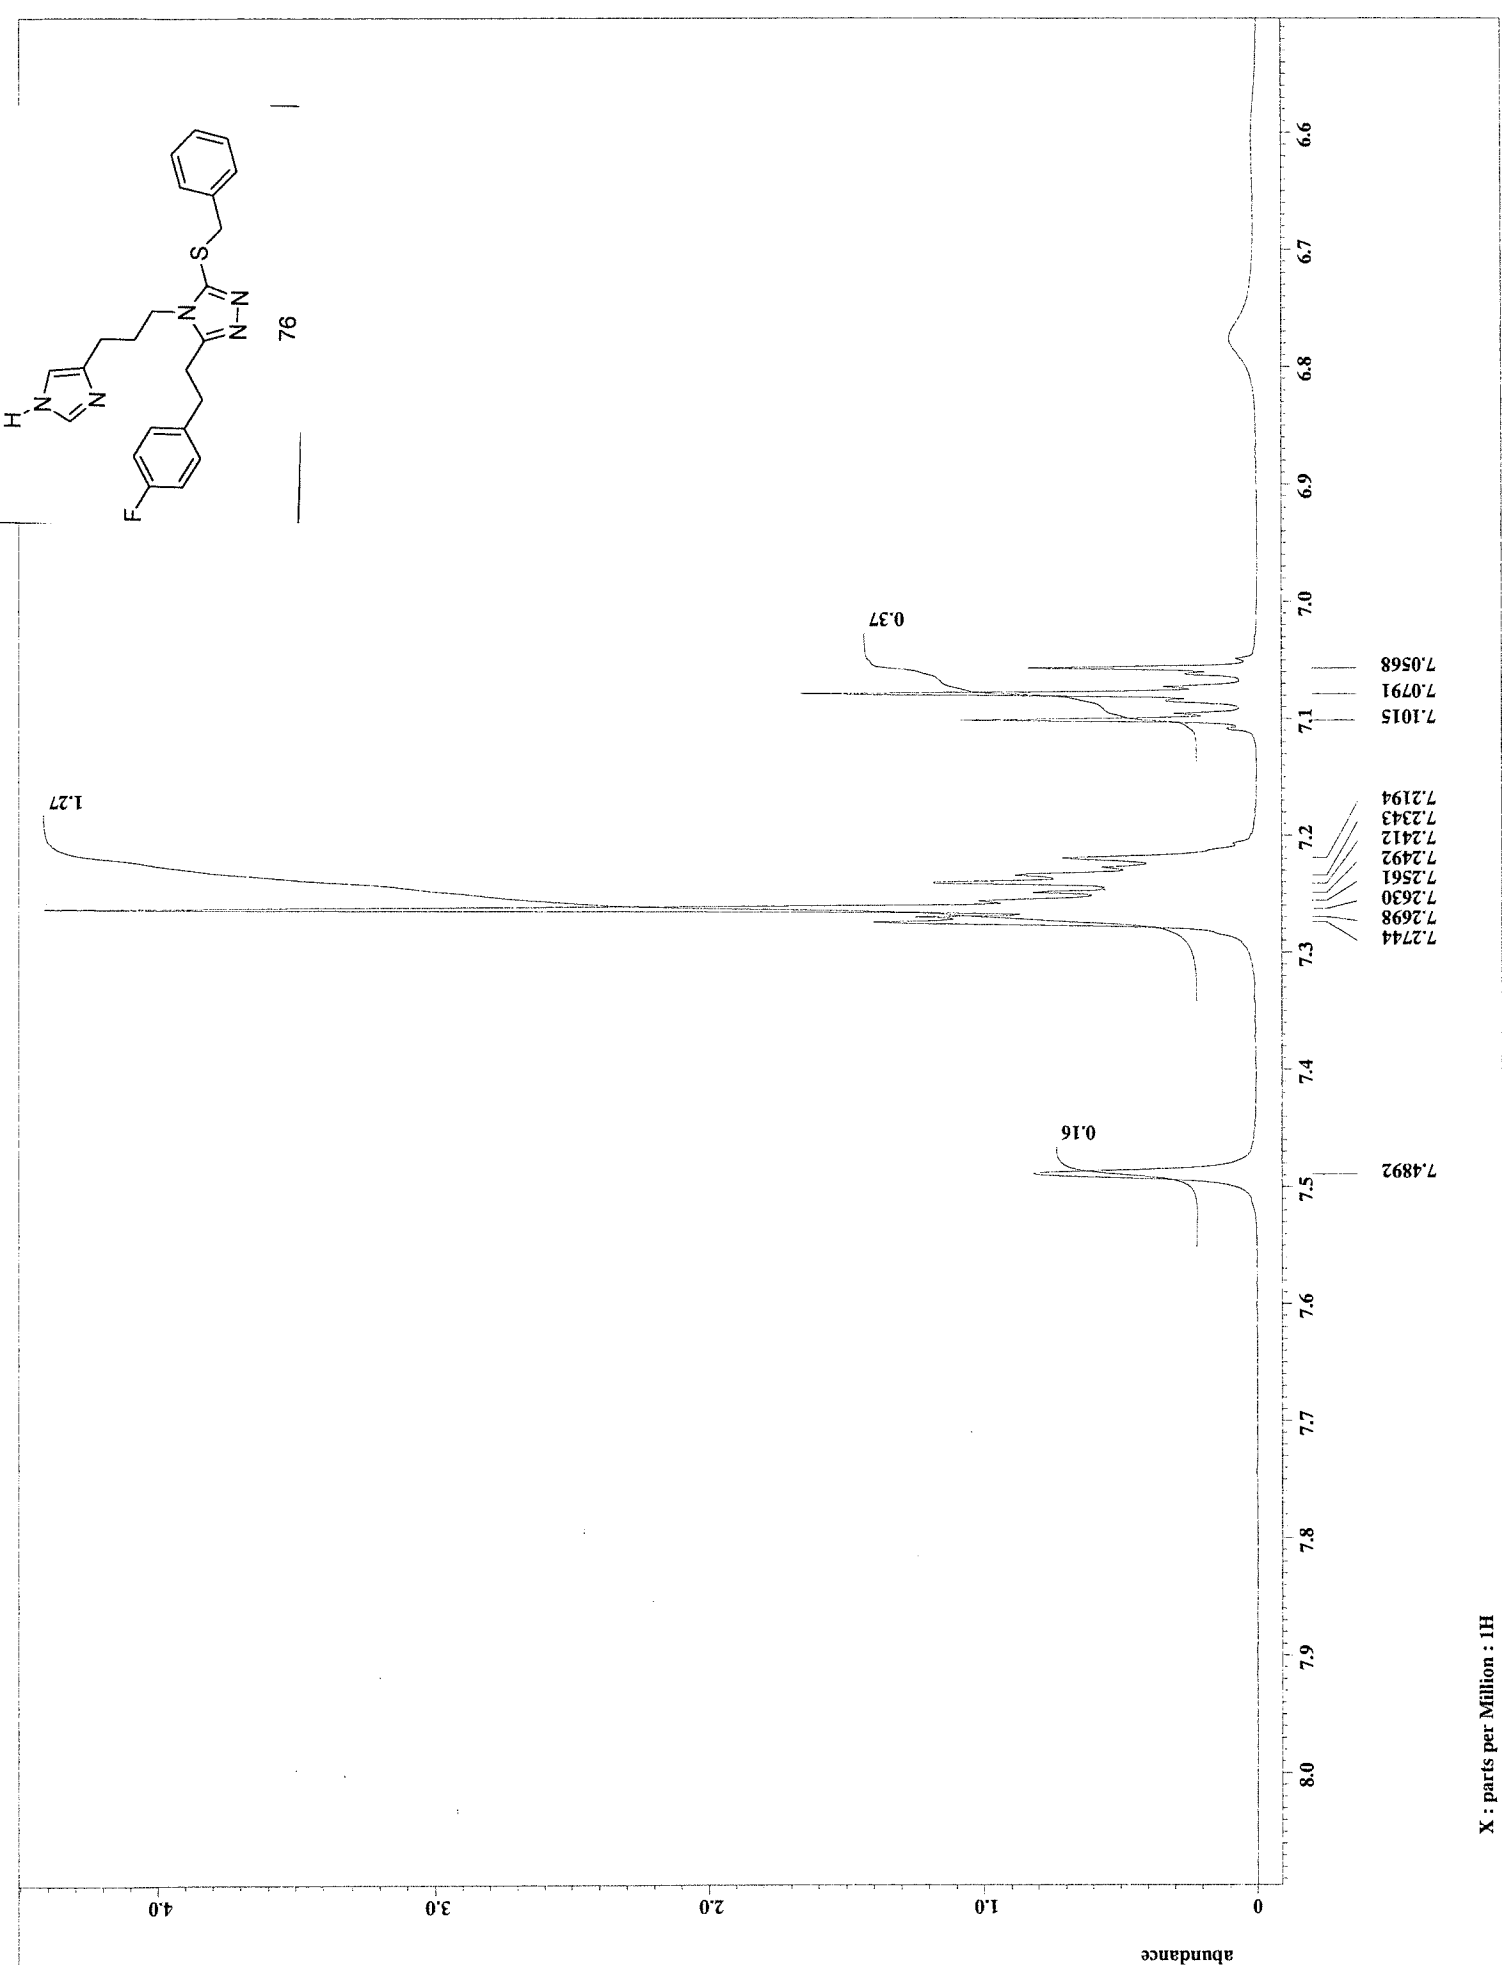

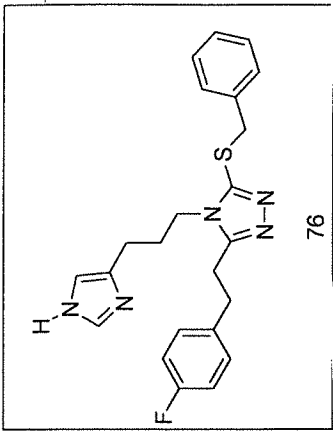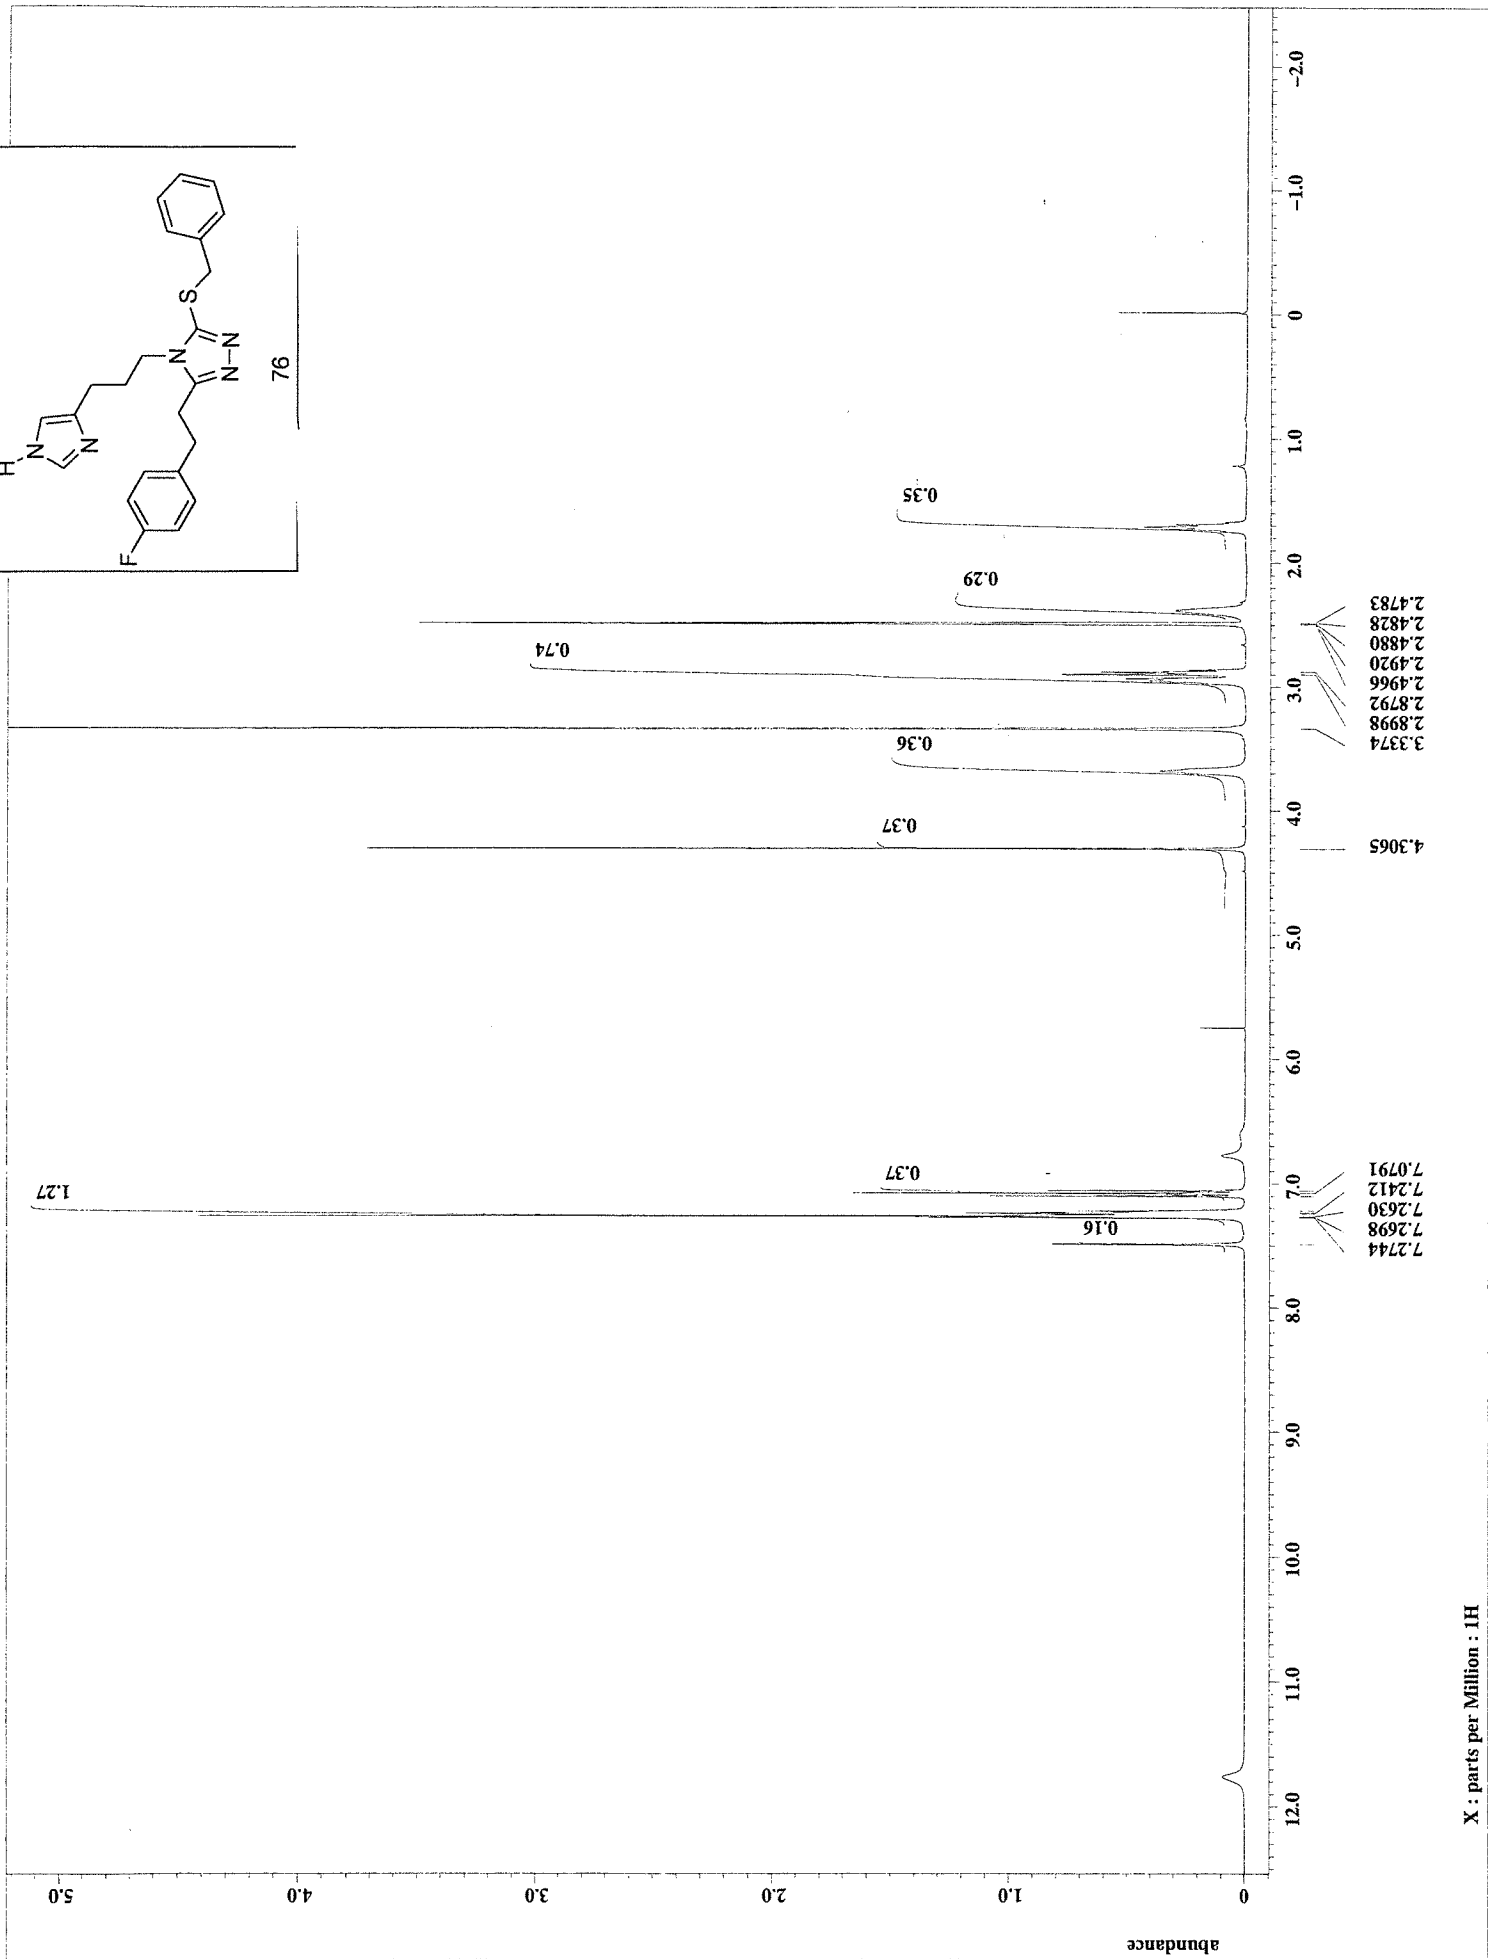

X : parts per Million : 1H

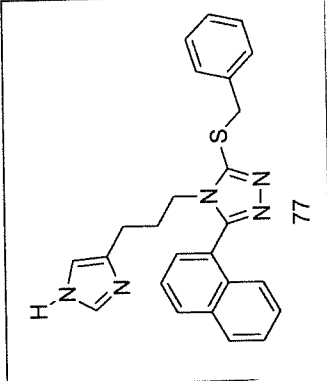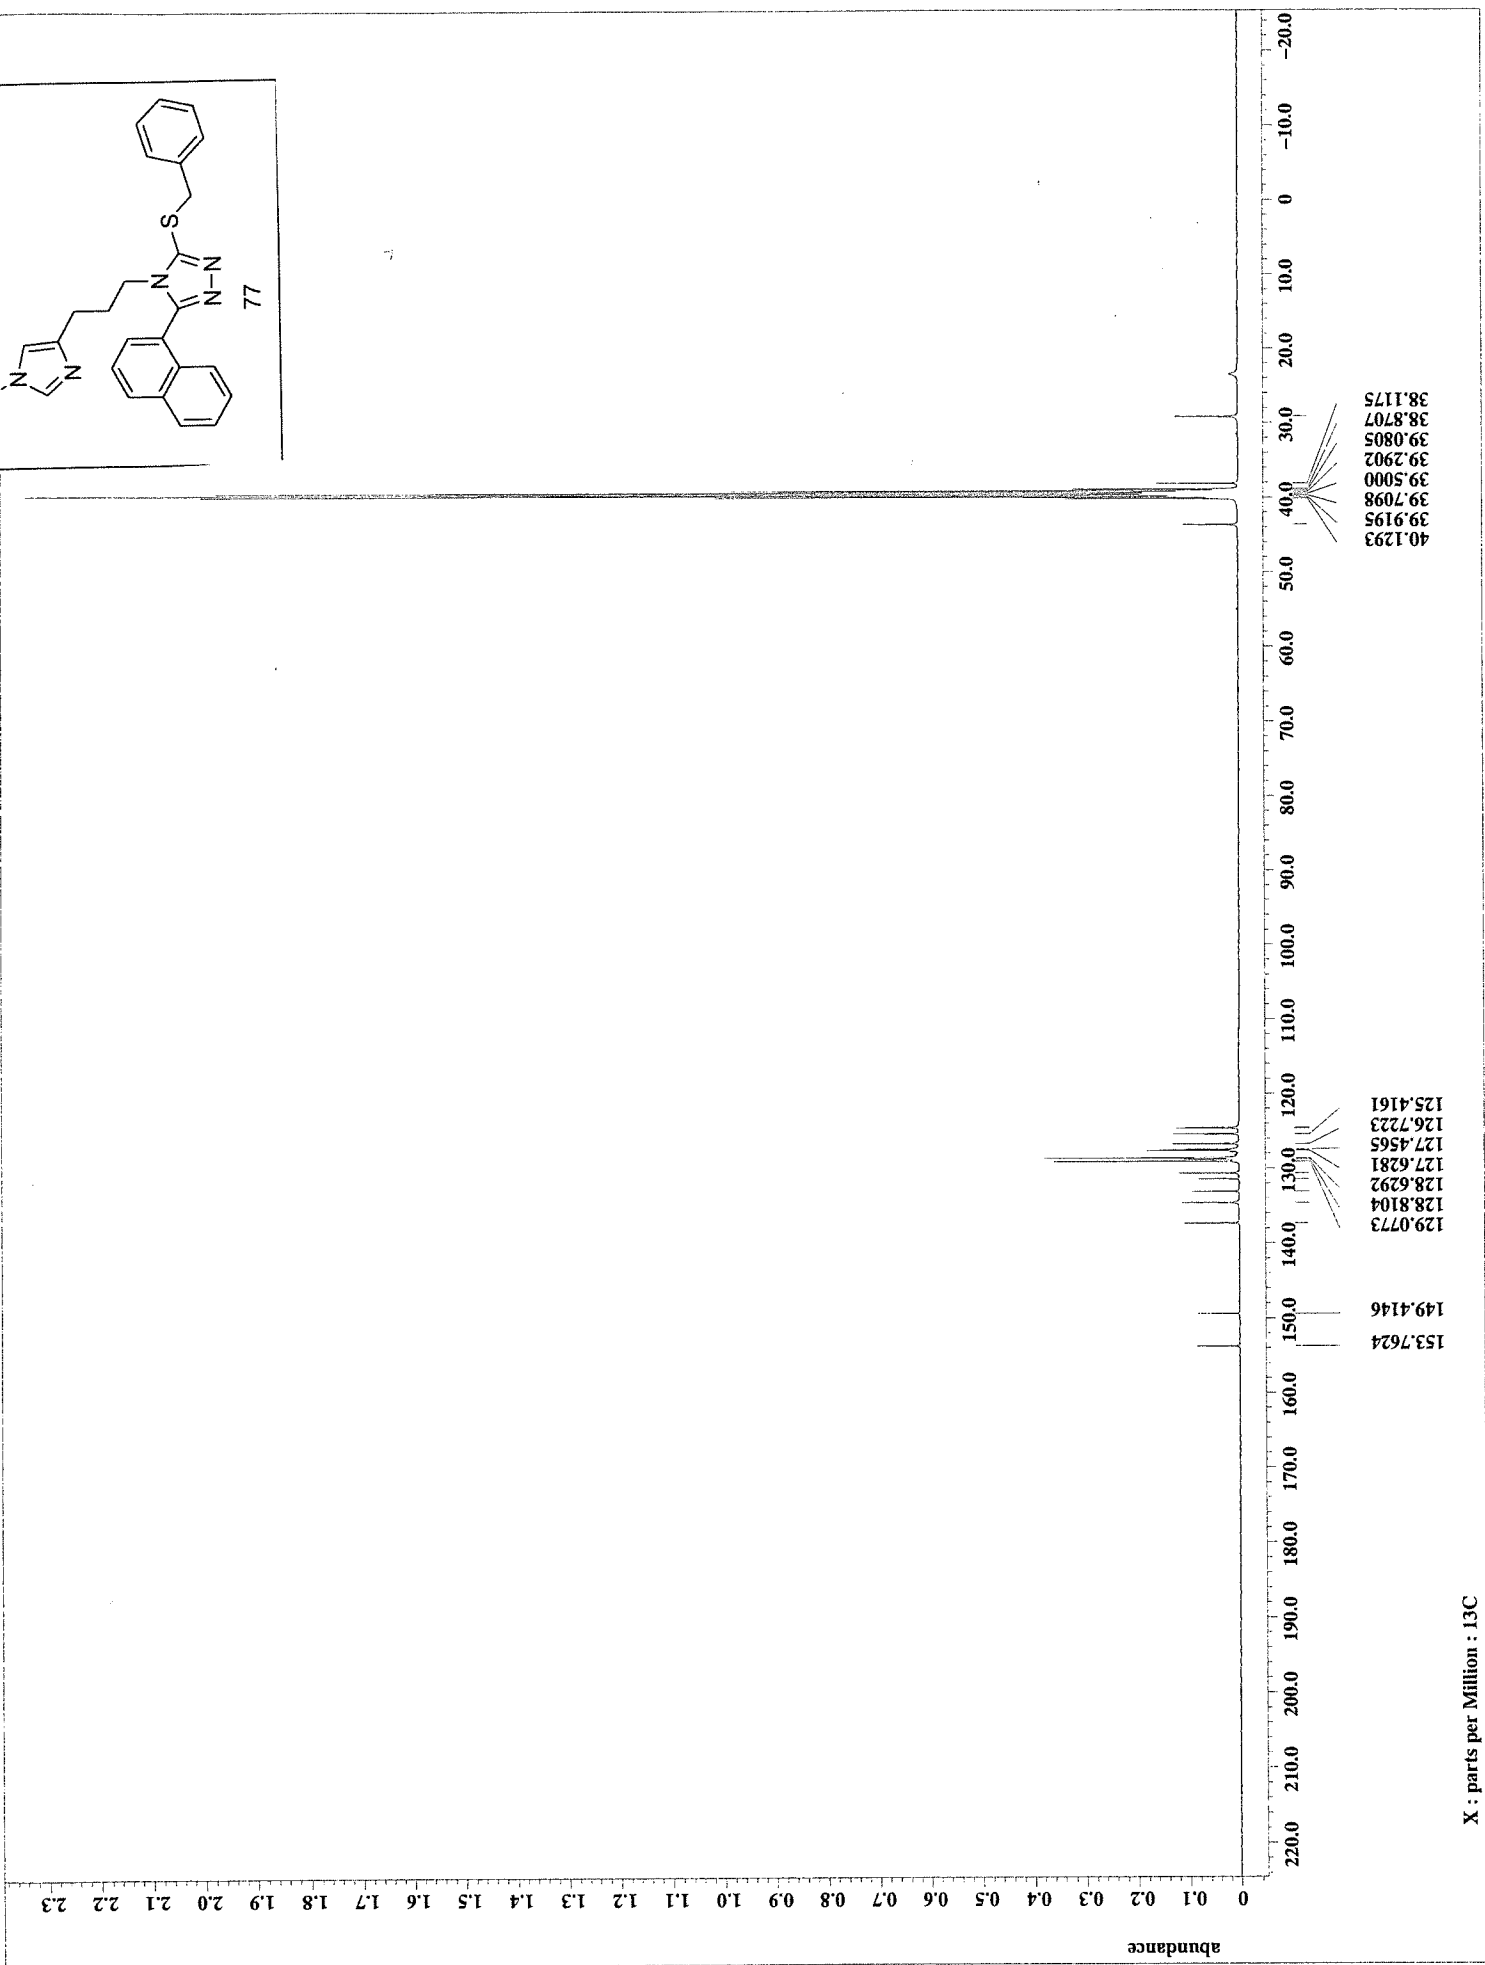

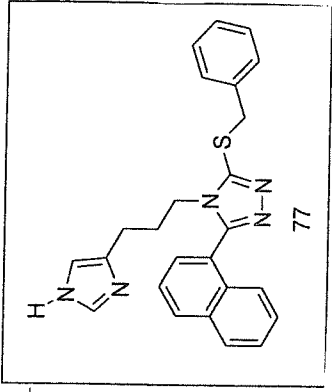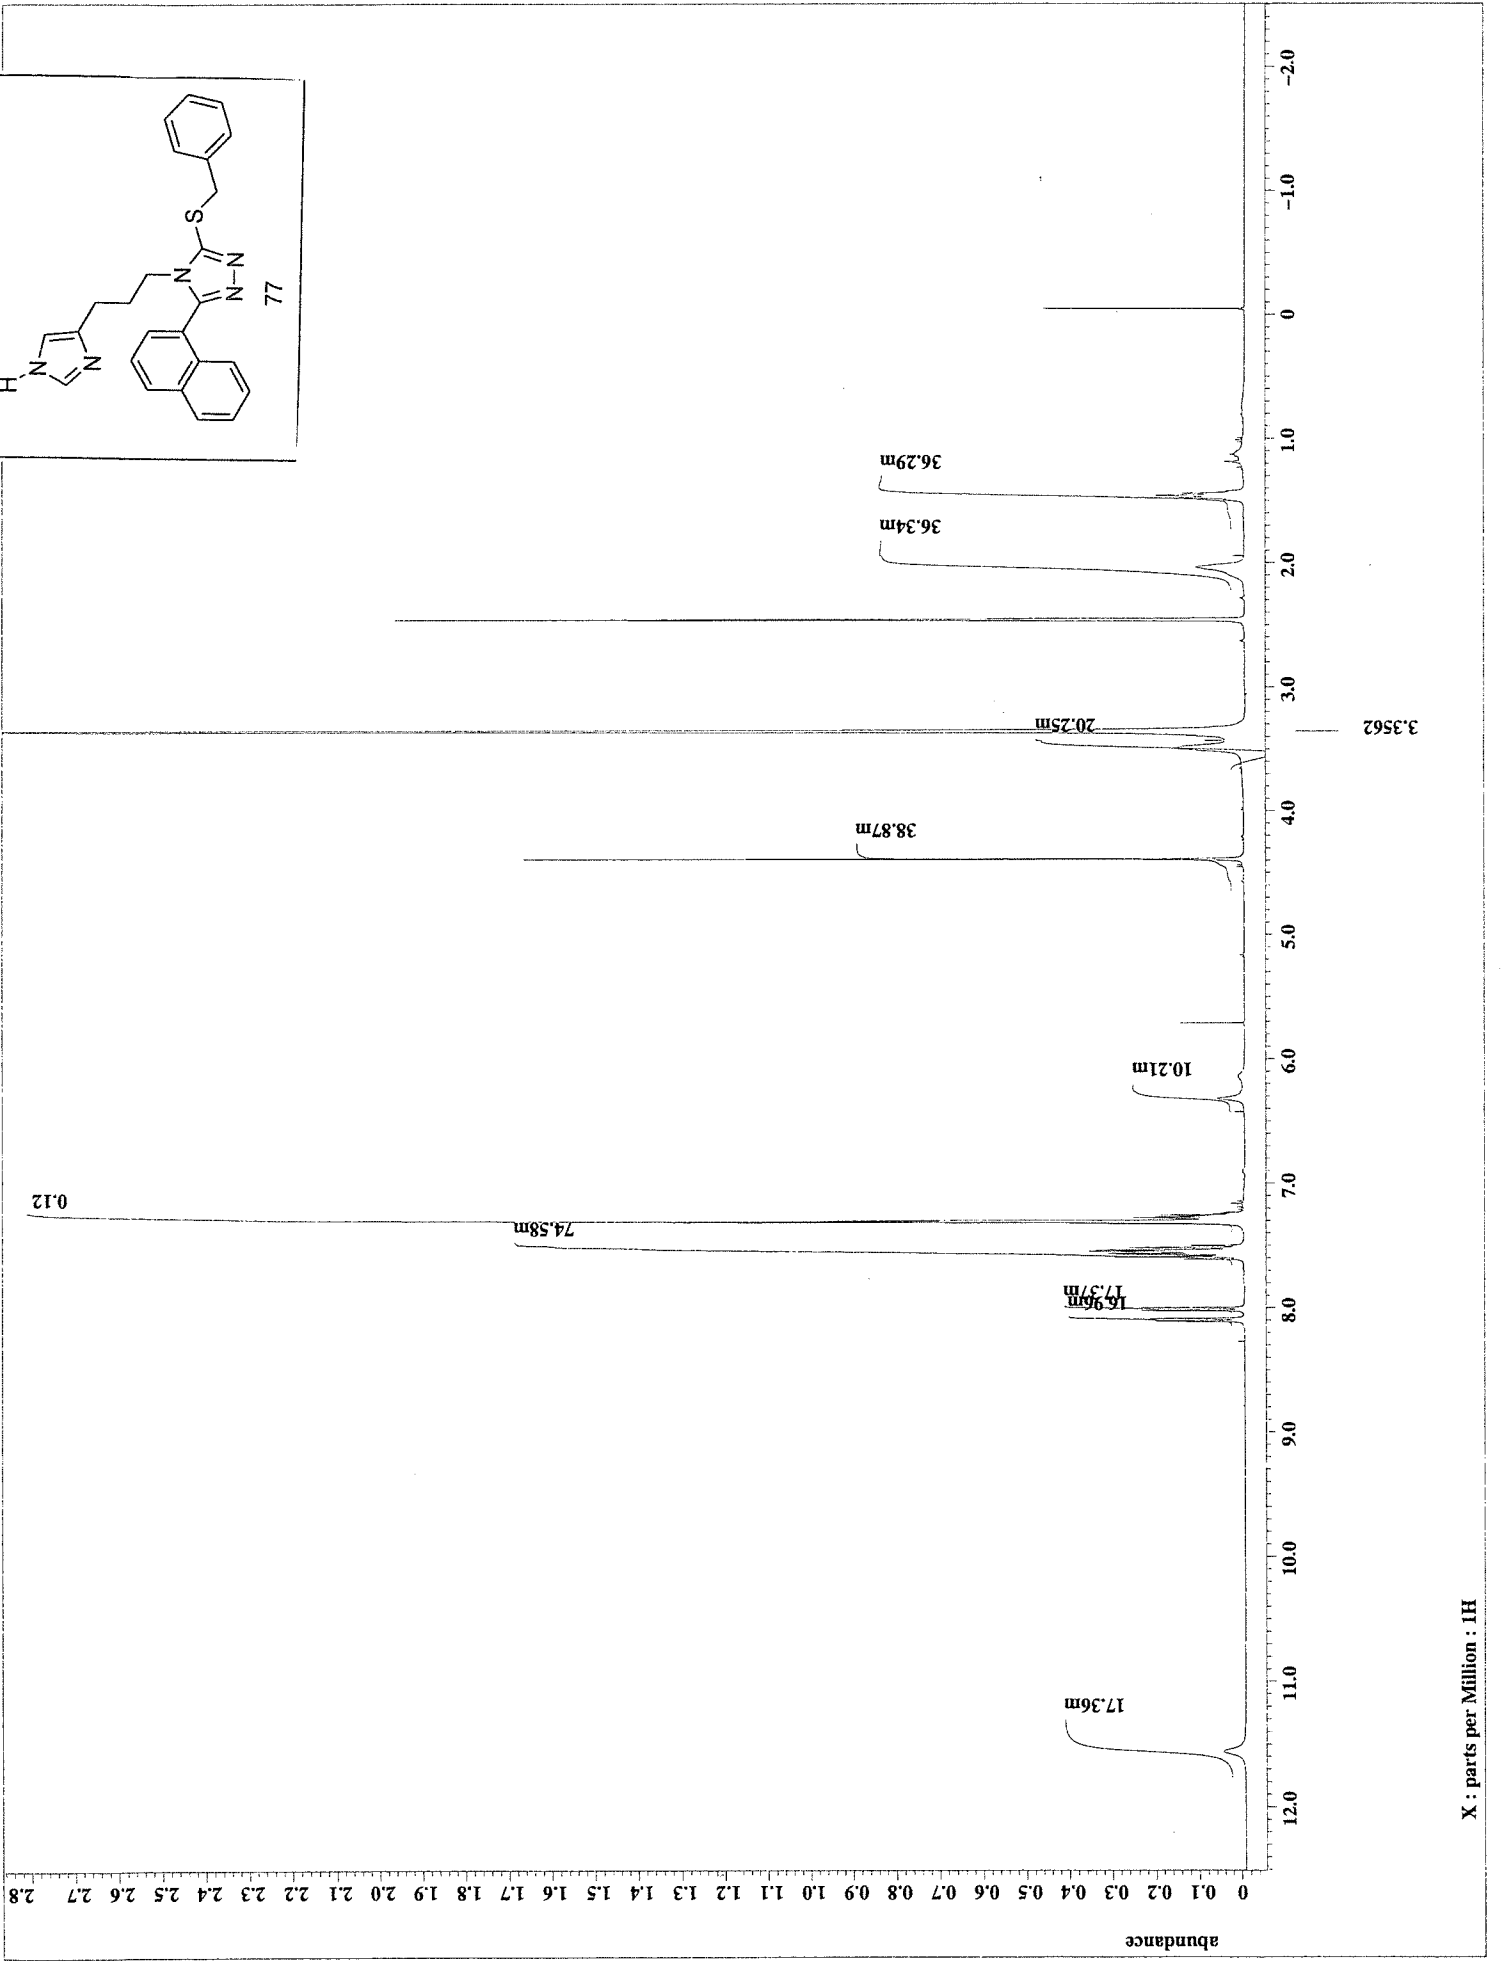

X : parts per Million : 1H

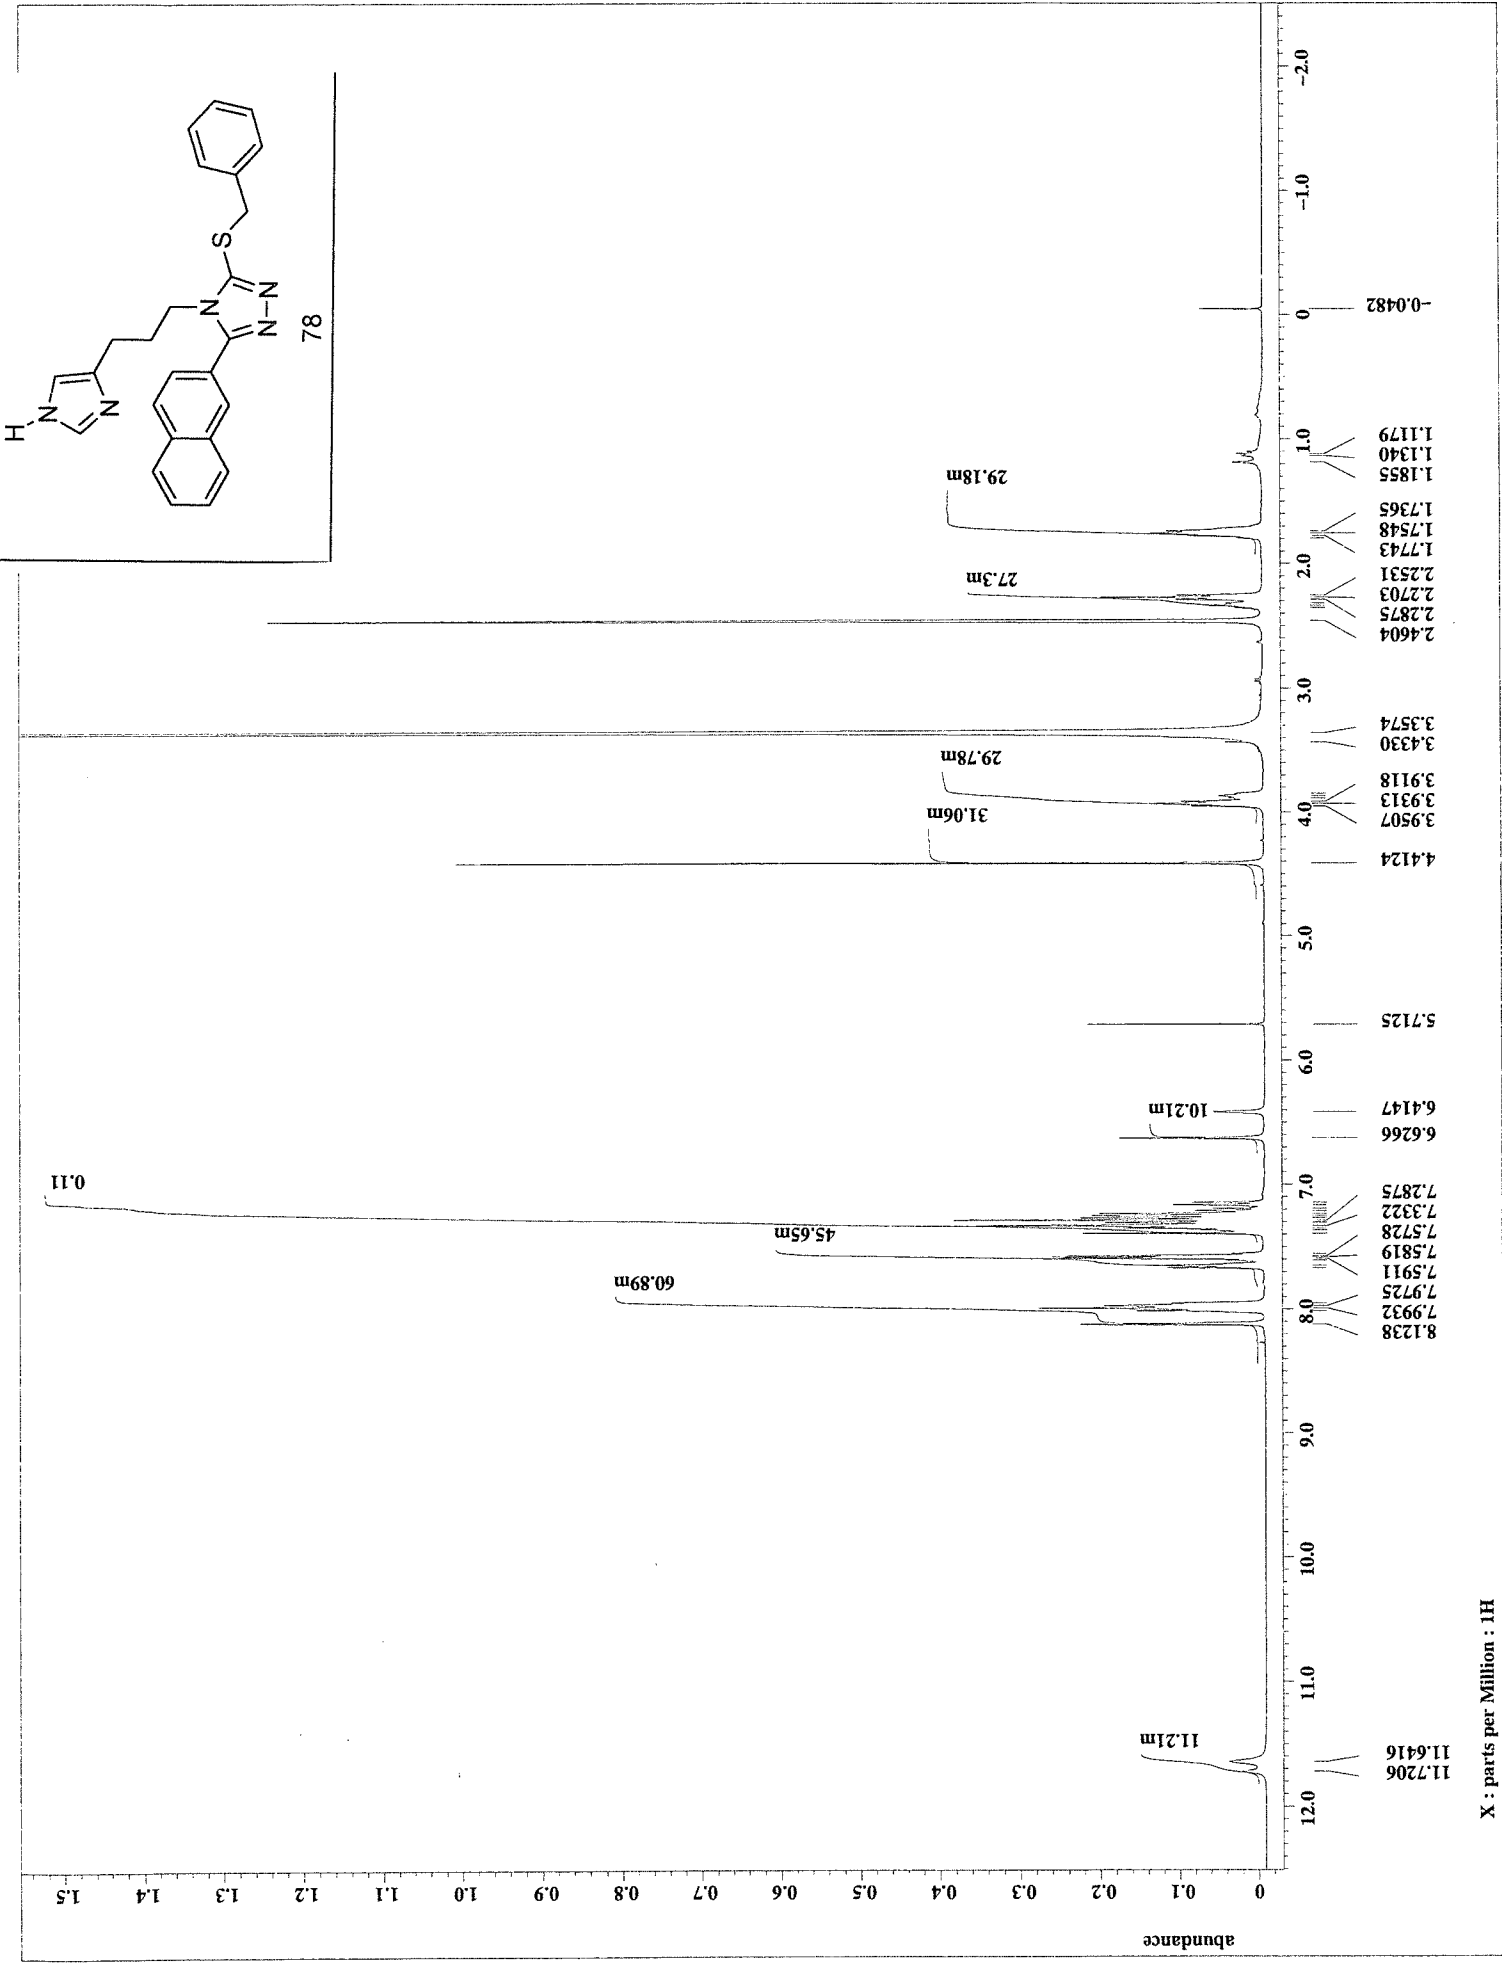

X : parts per Million : 1H



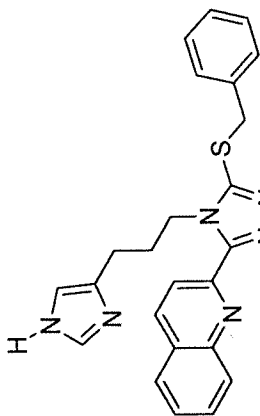

79

```

Dim_title      = 13C
Dim_units      = [ppm]
Dimensions     = X
Site           = ECS 400
Spectrometer   = JNM-ECS400

Field_strength = 9.389766[T] (400 [MHz])
X_acq_duration = 1.04333312[s]
X_domain       = 13C
X_freq         = 100.52530333 [MHz]
X_offset       = 100 [ppm]
X_points       = 32768
X_prescans     = 4
X_resolution   = 0.95846665 [Hz]
X_sweep        = 31.40703518 [kHz]
Irr_domain     = 1H
Irr_freq       = 399.78219838 [MHz]
Irr_offset     = 5 [ppm]
Clipped        = FALSE
Mod_return     = 1
Scans          = 12000
Total_scans    = 12000

X_90_width     = 12.84 [us]
X_acq_time     = 1.04333312 [s]
X_angle        = 30 [deg]
X_atn          = 9 [dB]
X_pulse        = 4.28 [us]
Irr_atn_dec   = 27 [dB]
Irr_atn_noe   = 27 [dB]
Irr_noise      = WALTZ
Decoupling     = TRUE
Initial_wait   = 1 [s]
Noe            = TRUE
Noe_time       = 2 [s]
Recvr_gain     = 60
Relaxation_delay = 2 [s]
Repetition_time = 3.04333312 [s]
Temp_get       = 18.7 [dC]
  
```

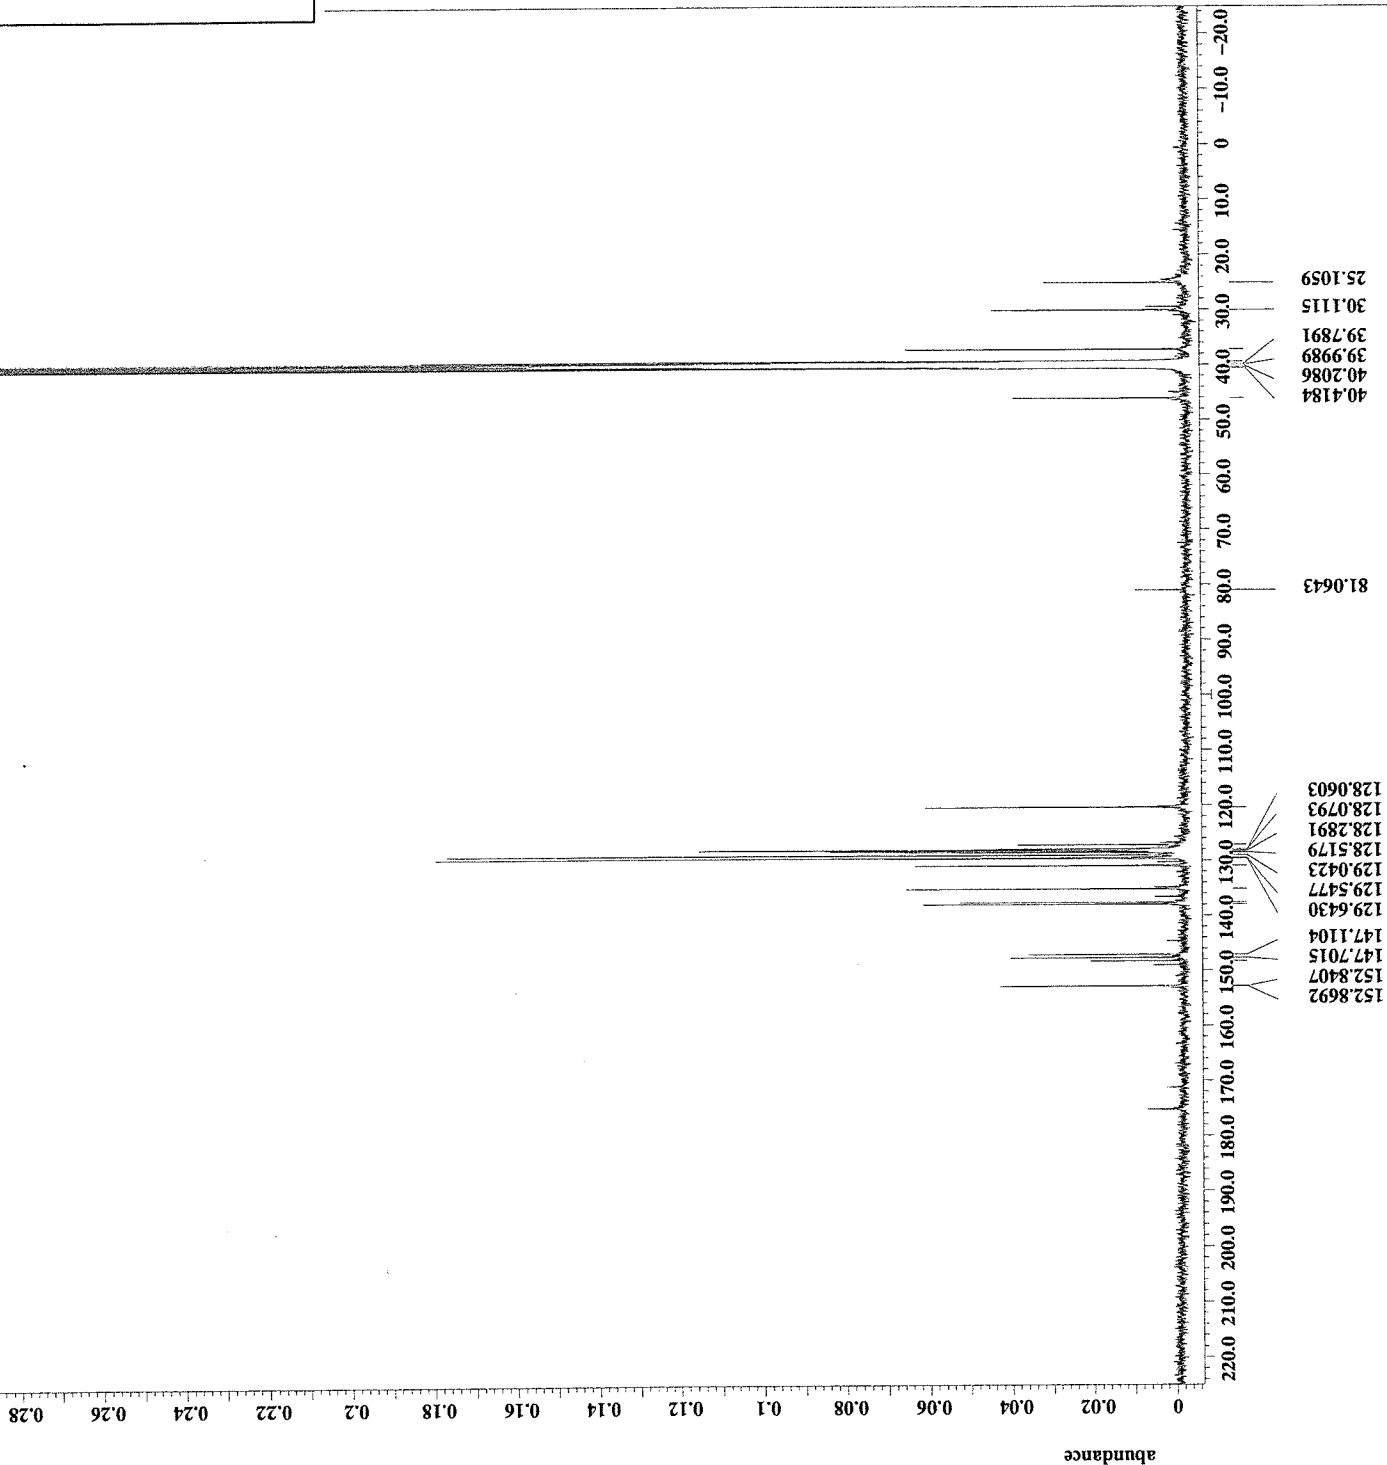

X : parts per Million : 13C

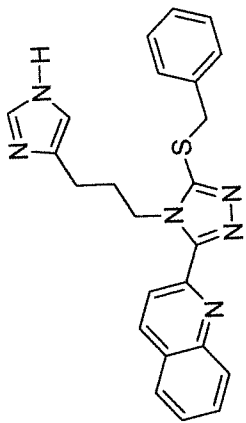

N-5.jdf

3C

79

current\_time = 16-JUL-2024 09:39:56  
 .06:46  
 .39:47

```

Comment
Data_format = ID COMPLEX
Dim_size = 26214
Dim_title = 13C
Dim_units = [ppm]
Dimensions = X
Site = ECS 400
Spectrometer = JNM-ECS400

Field_strength = 9.389766[T] (400 [MHz])
X_acq_duration = 1.04333312[s]
X_domain = 13C
X_freq = 100.52530333 [MHz]
X_offset = 100 [ppm]
X_points = 32768
X_prescans = 4
X_resolution = 0.95846665 [Hz]
X_sweep = 31.40703518 [kHz]
Irr_domain = 1H.40703518 [kHz]
Irr_freq = 399.78219838 [MHz]
Irr_offset = 5 [ppm]
Clipped = FALSE
Mod_return = 1
Scans = 12000
Total_scans = 12000

X_90_width = 12.84 [us]
X_acq_time = 1.04333312 [s]
X_angle = 30 [deg]
X_atn = 9 [dB]
X_pulse = 4.28 [us]
Irr_atn_dec = 27 [dB]
Irr_atn_noe = 27 [dB]
Irr_noise = WALTZ
Decoupling = TRUE
Initial_wait = 1 [s]
Noe_time = TRUE
Noe_time = 2 [s]
Recvr_gain = 60
Relaxation_delay = 2 [s]
Repetition_time = 3.04333312 [s]
Temp_get = 18.7 [dC]
  
```

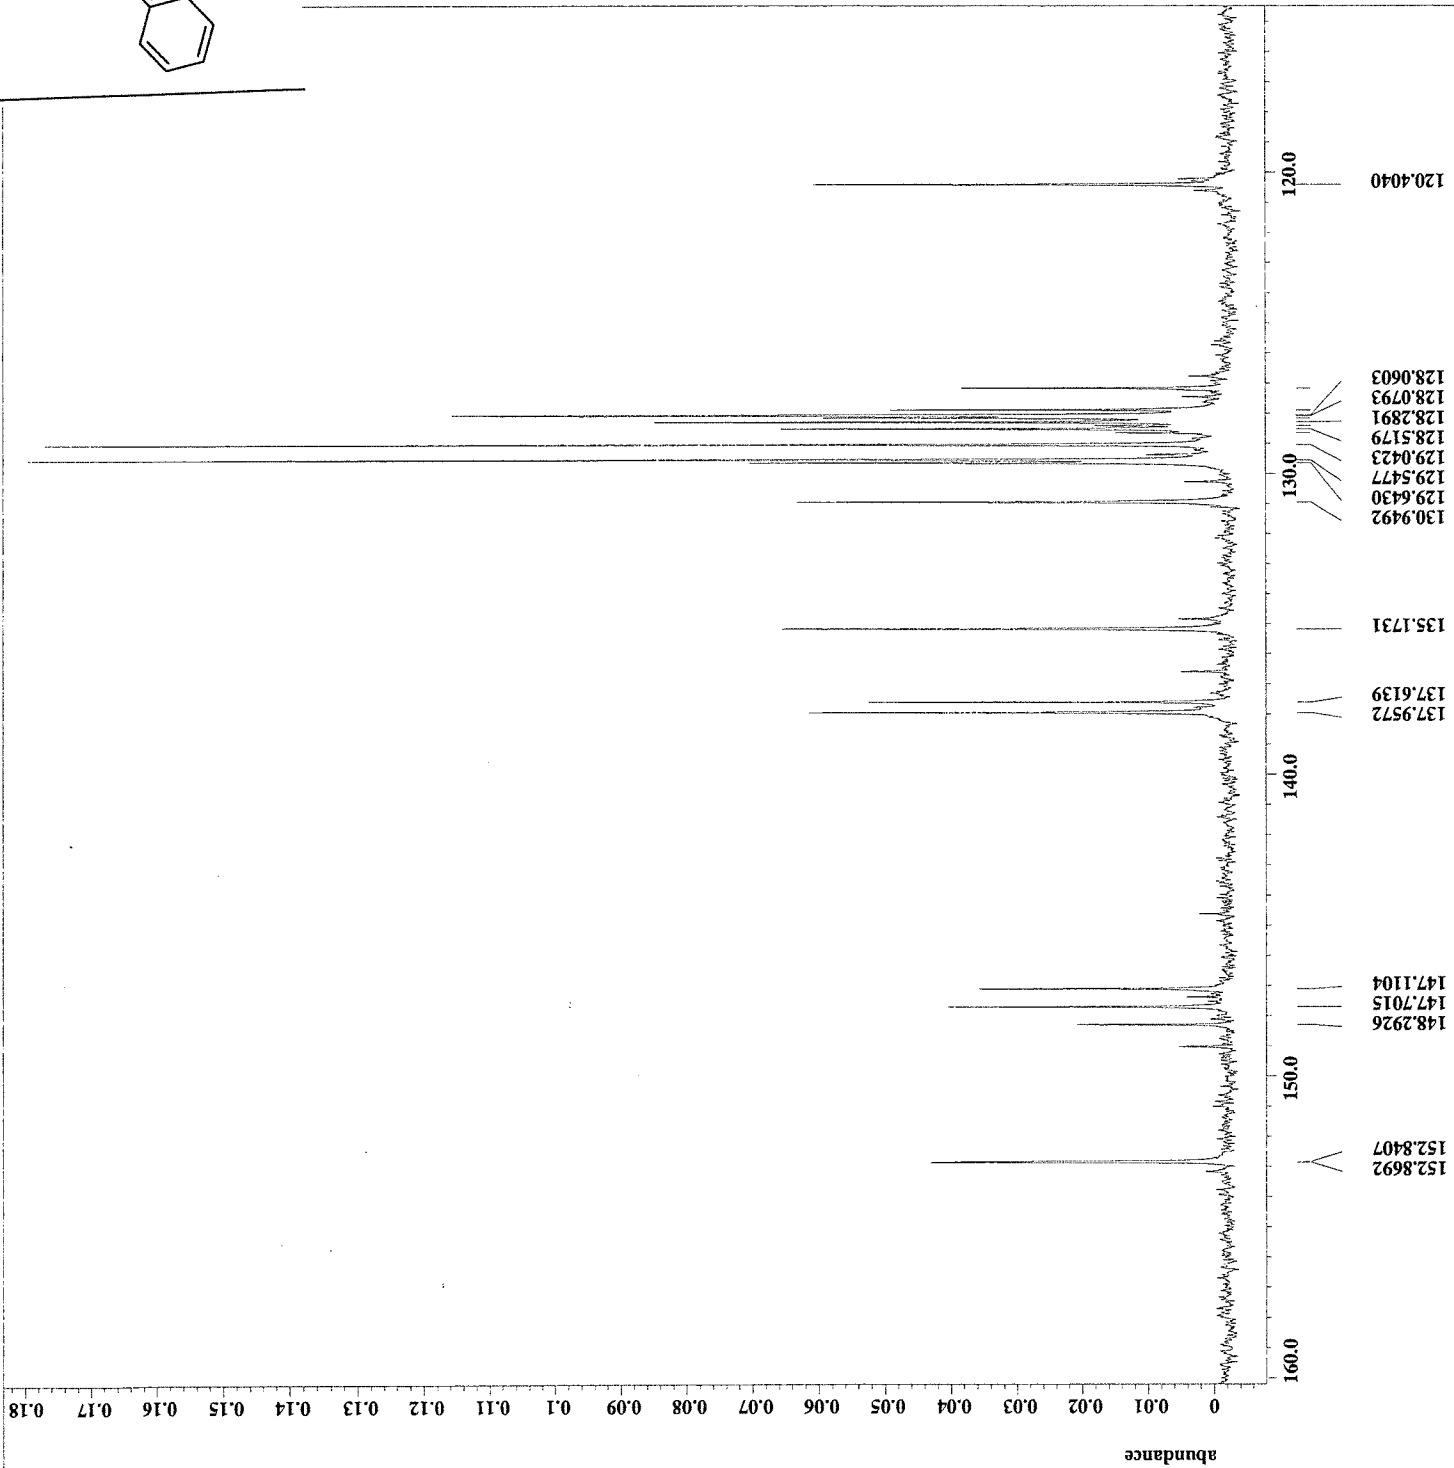

X : parts per Million : 13C

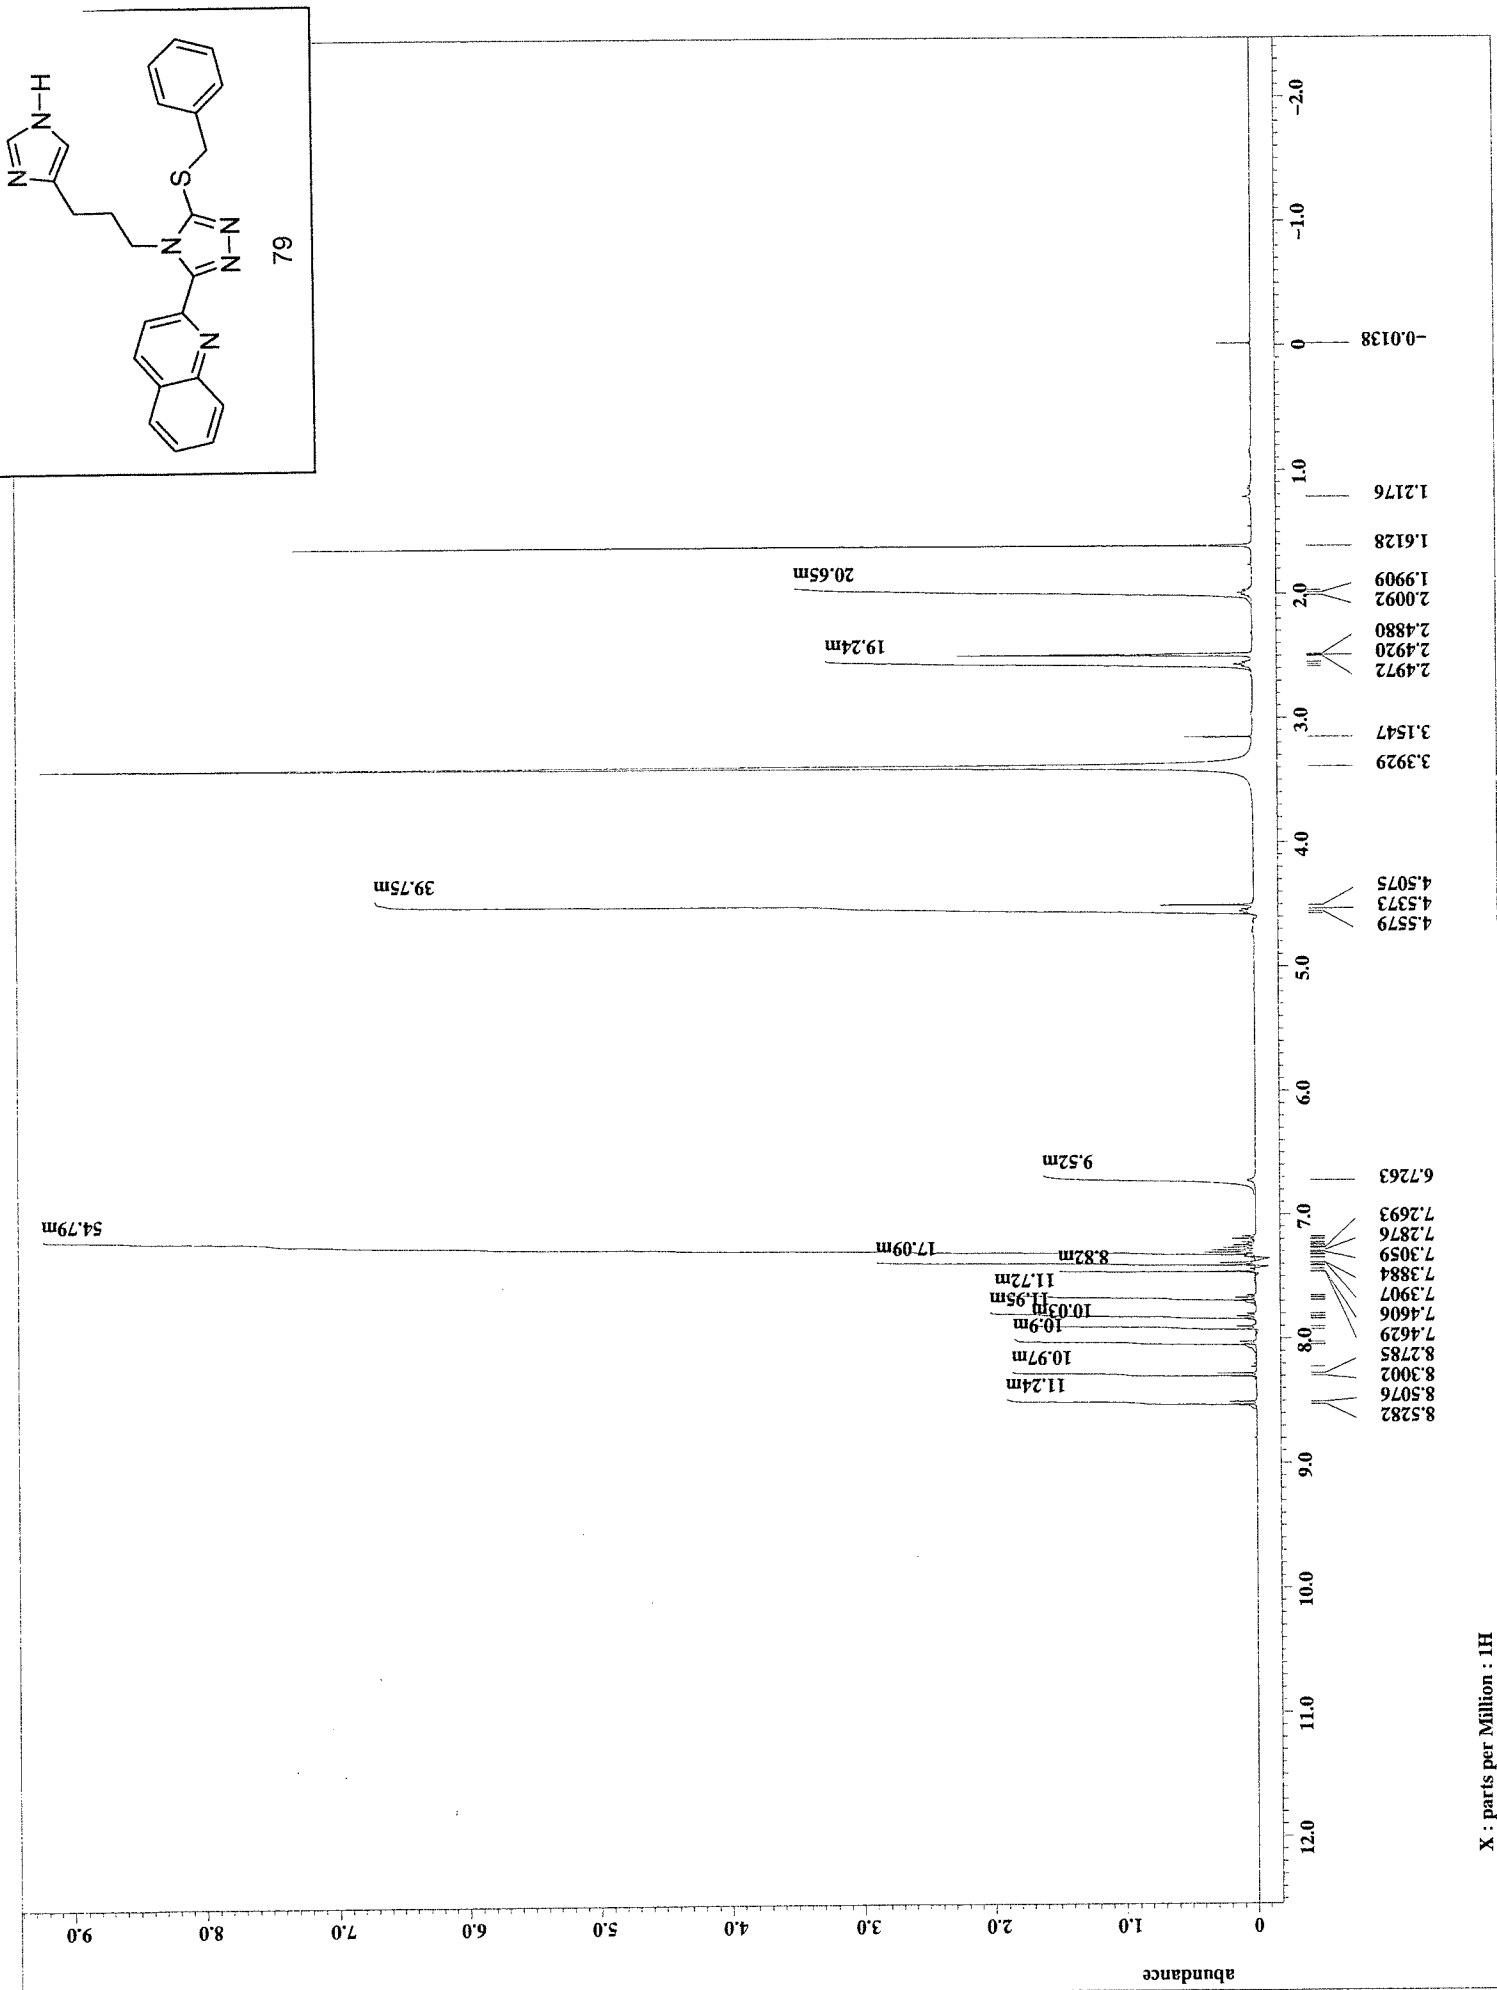

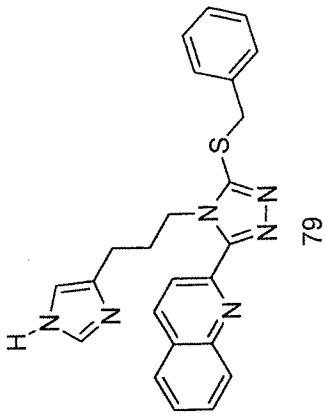

79

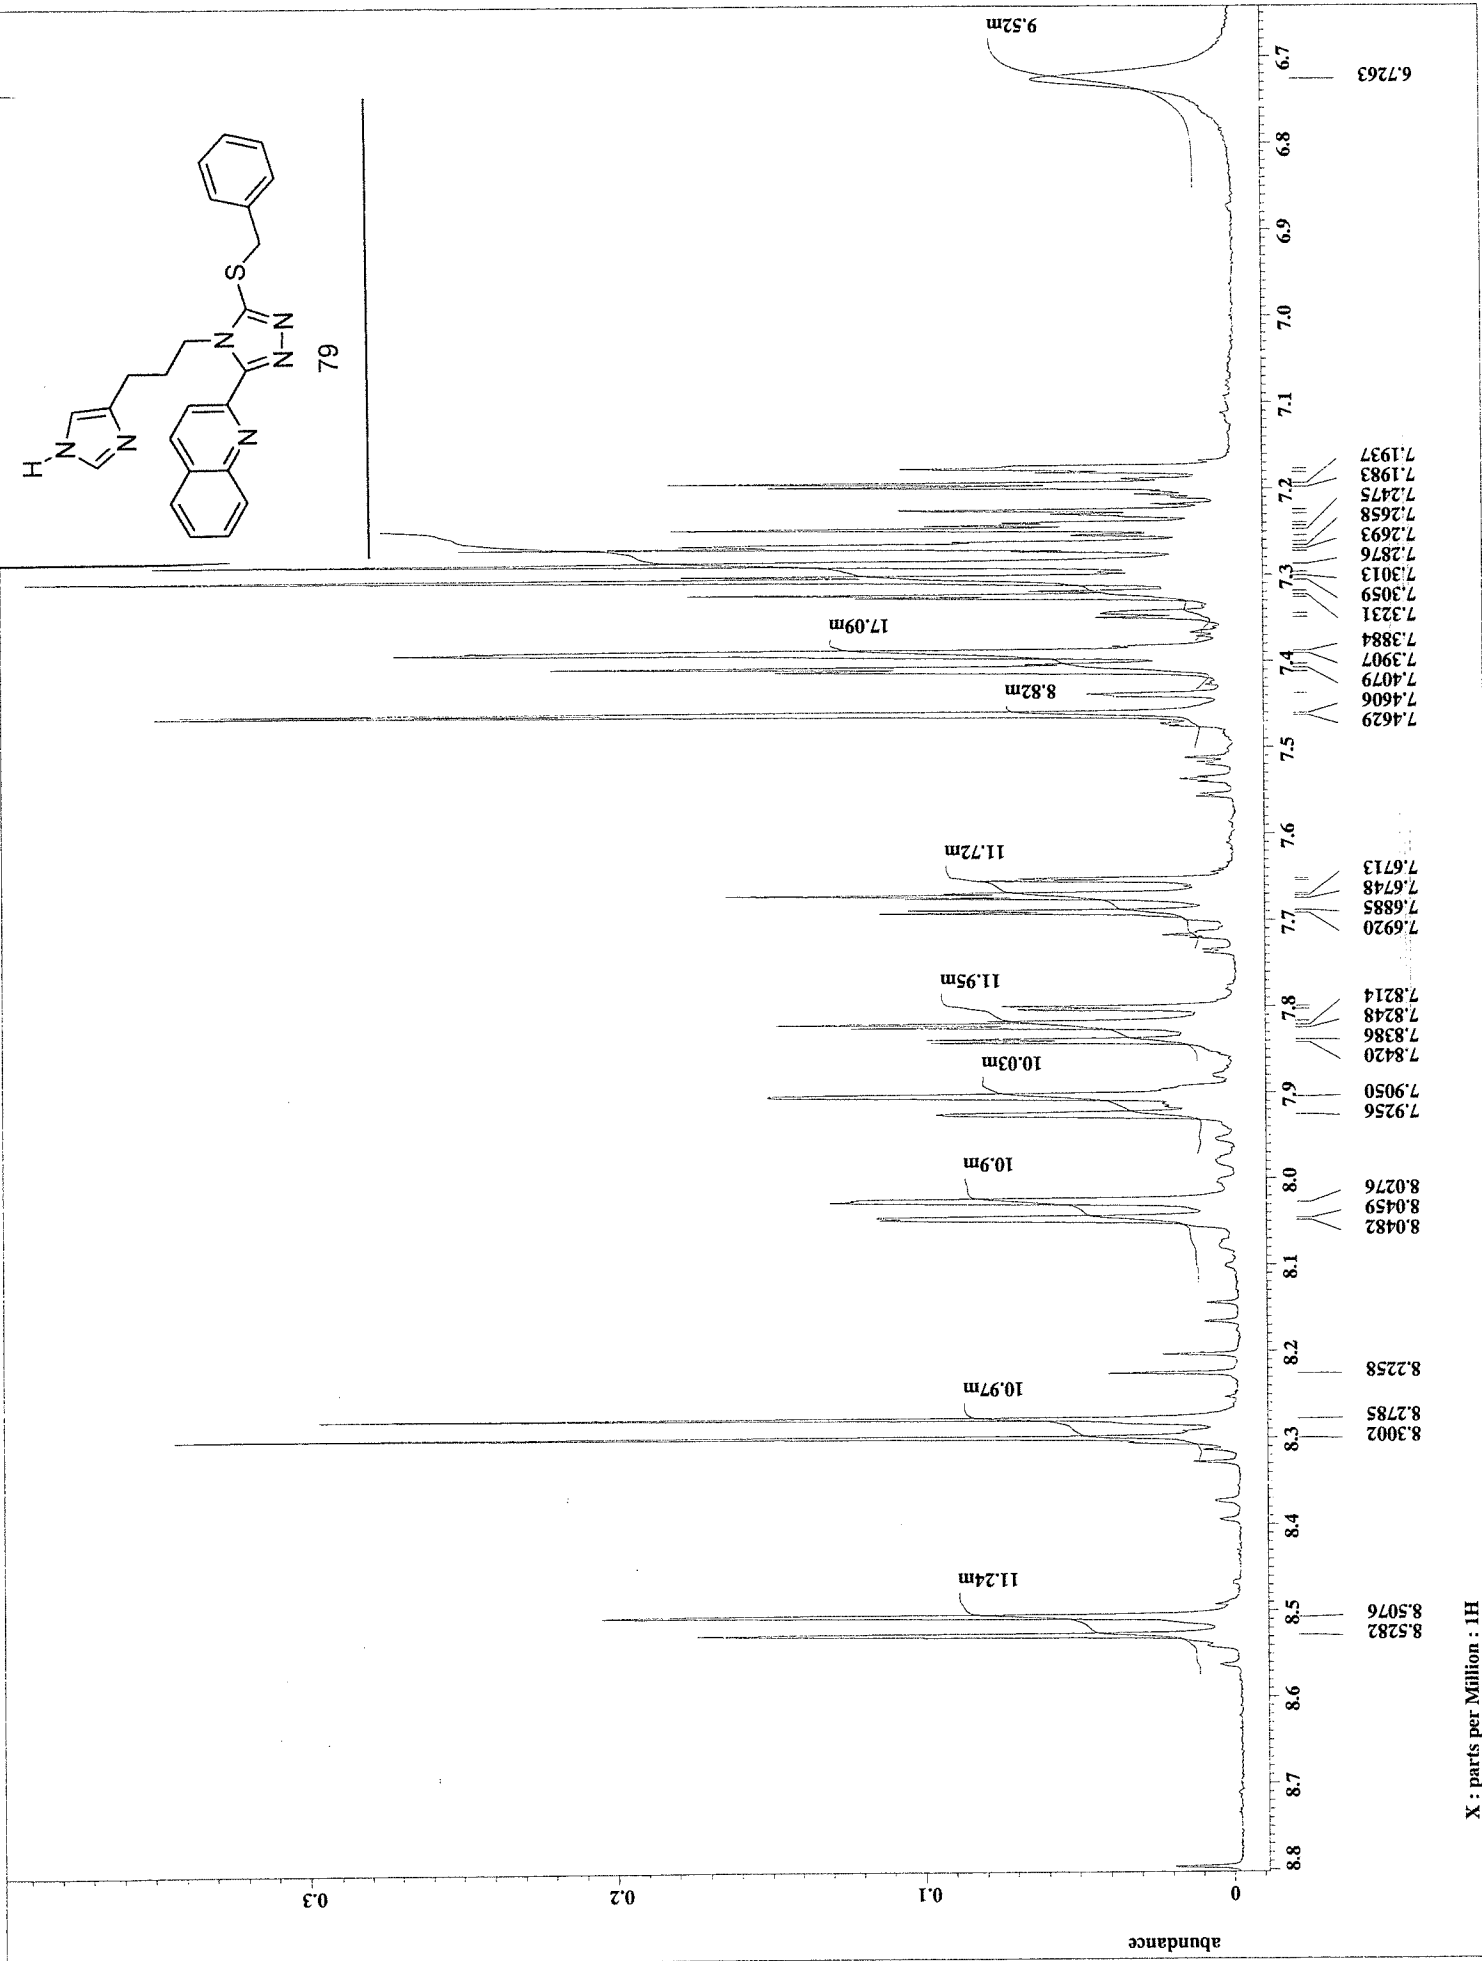

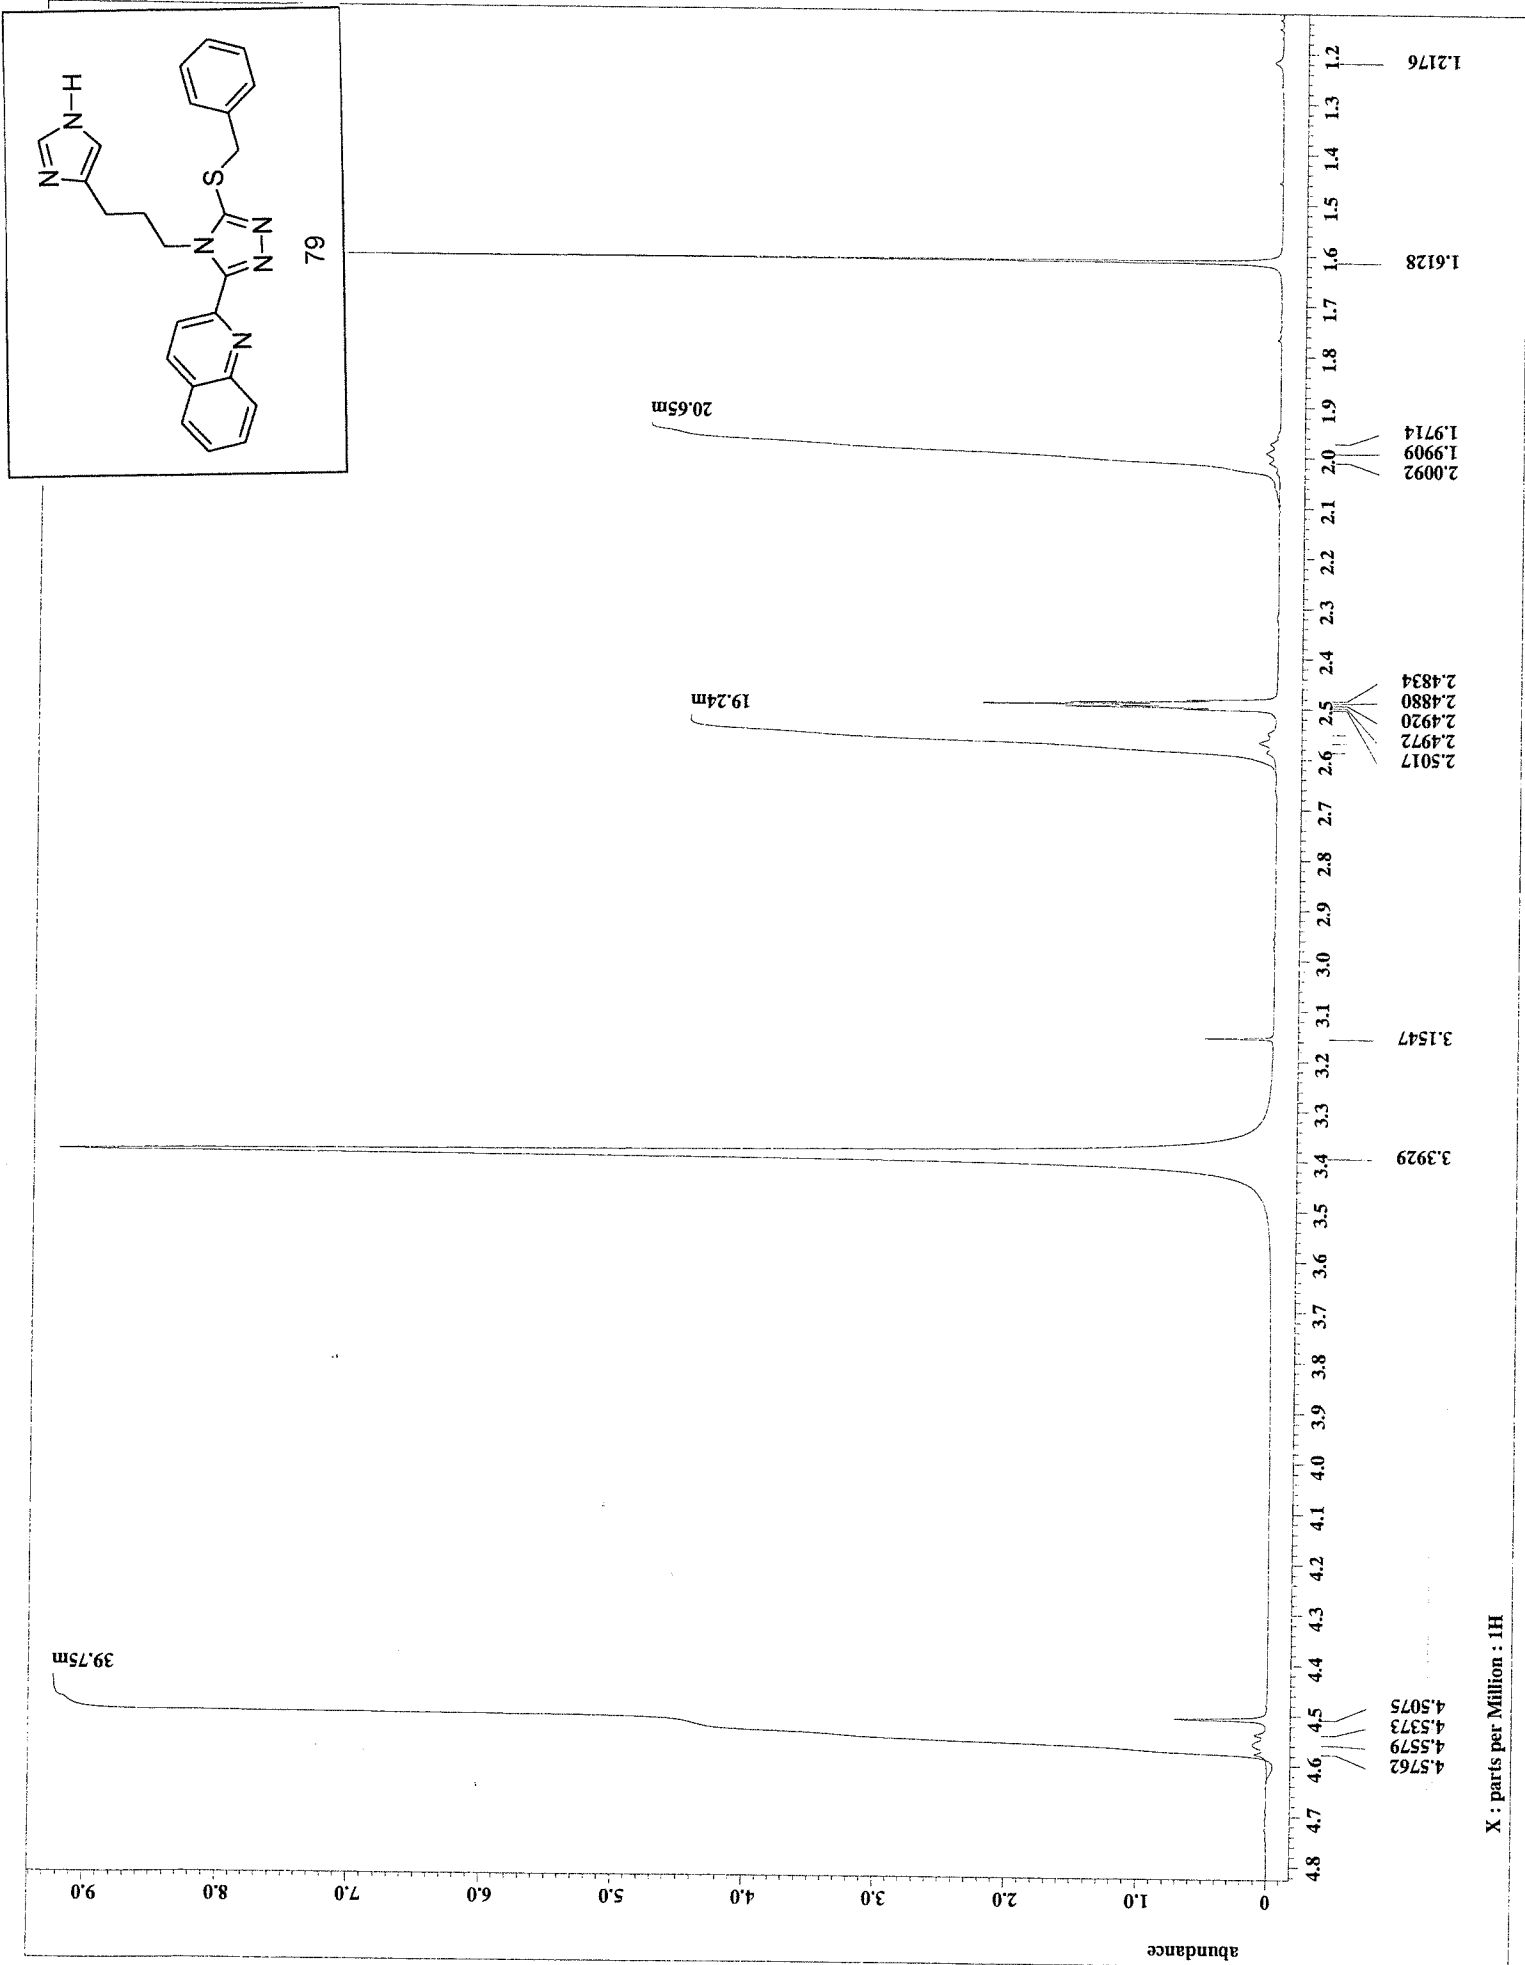

X : parts per Million : 1H

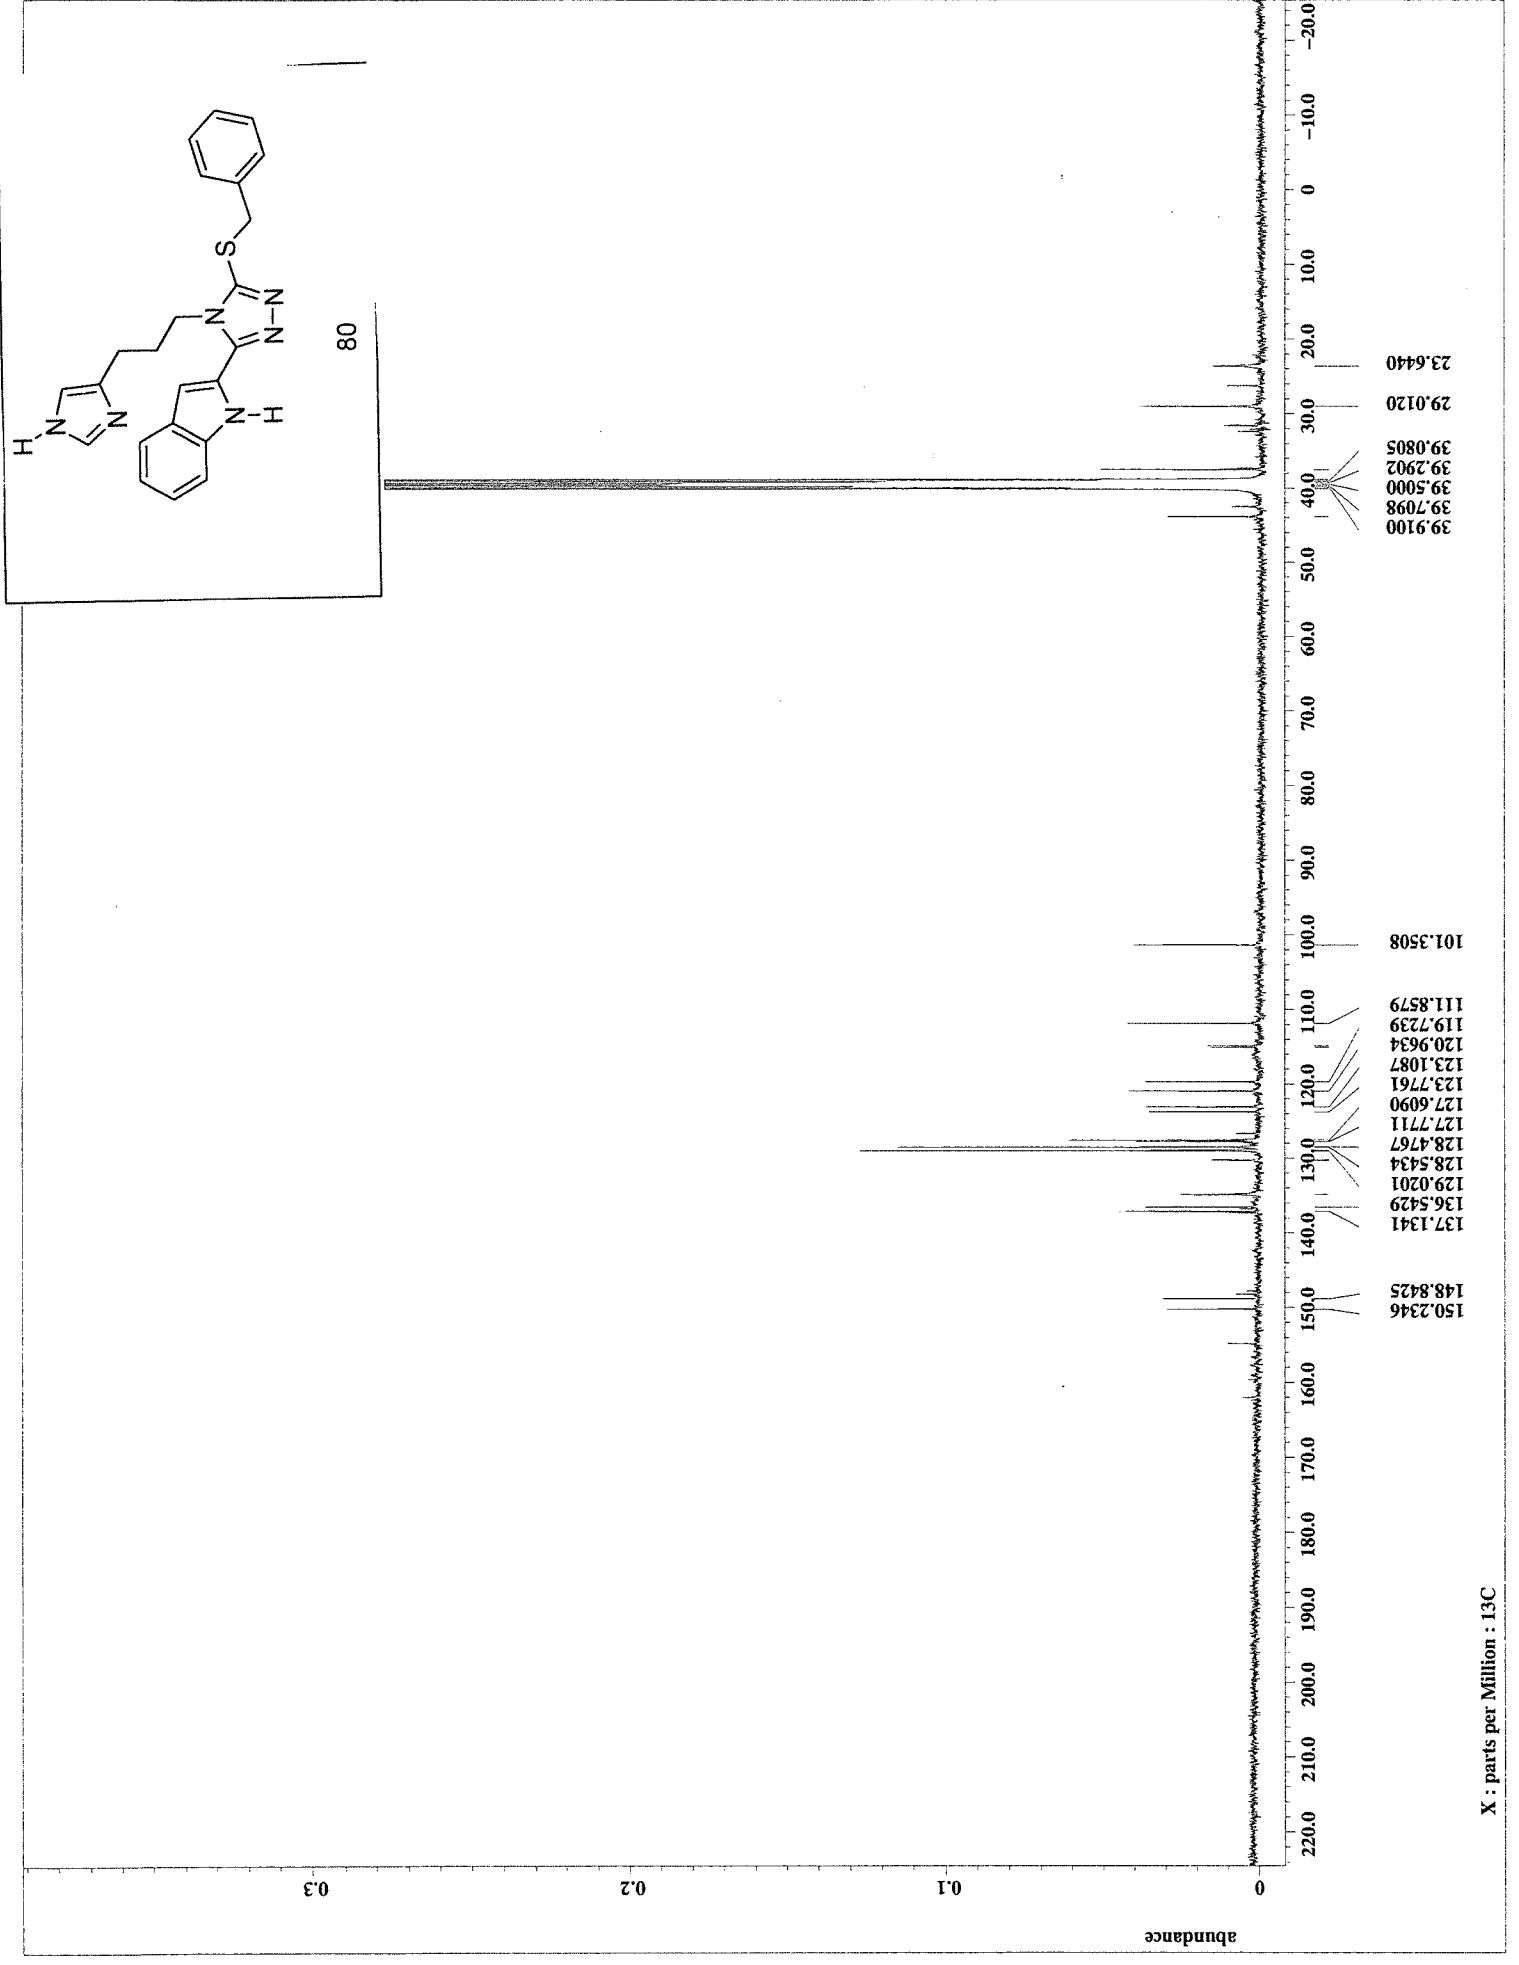

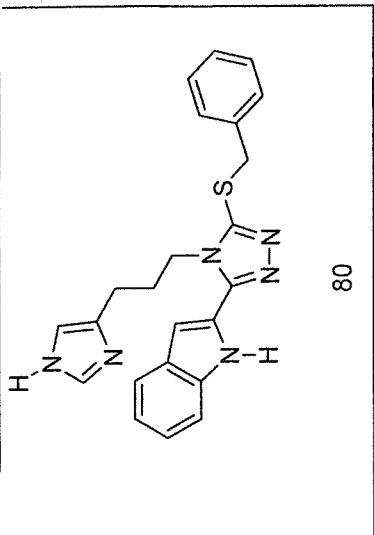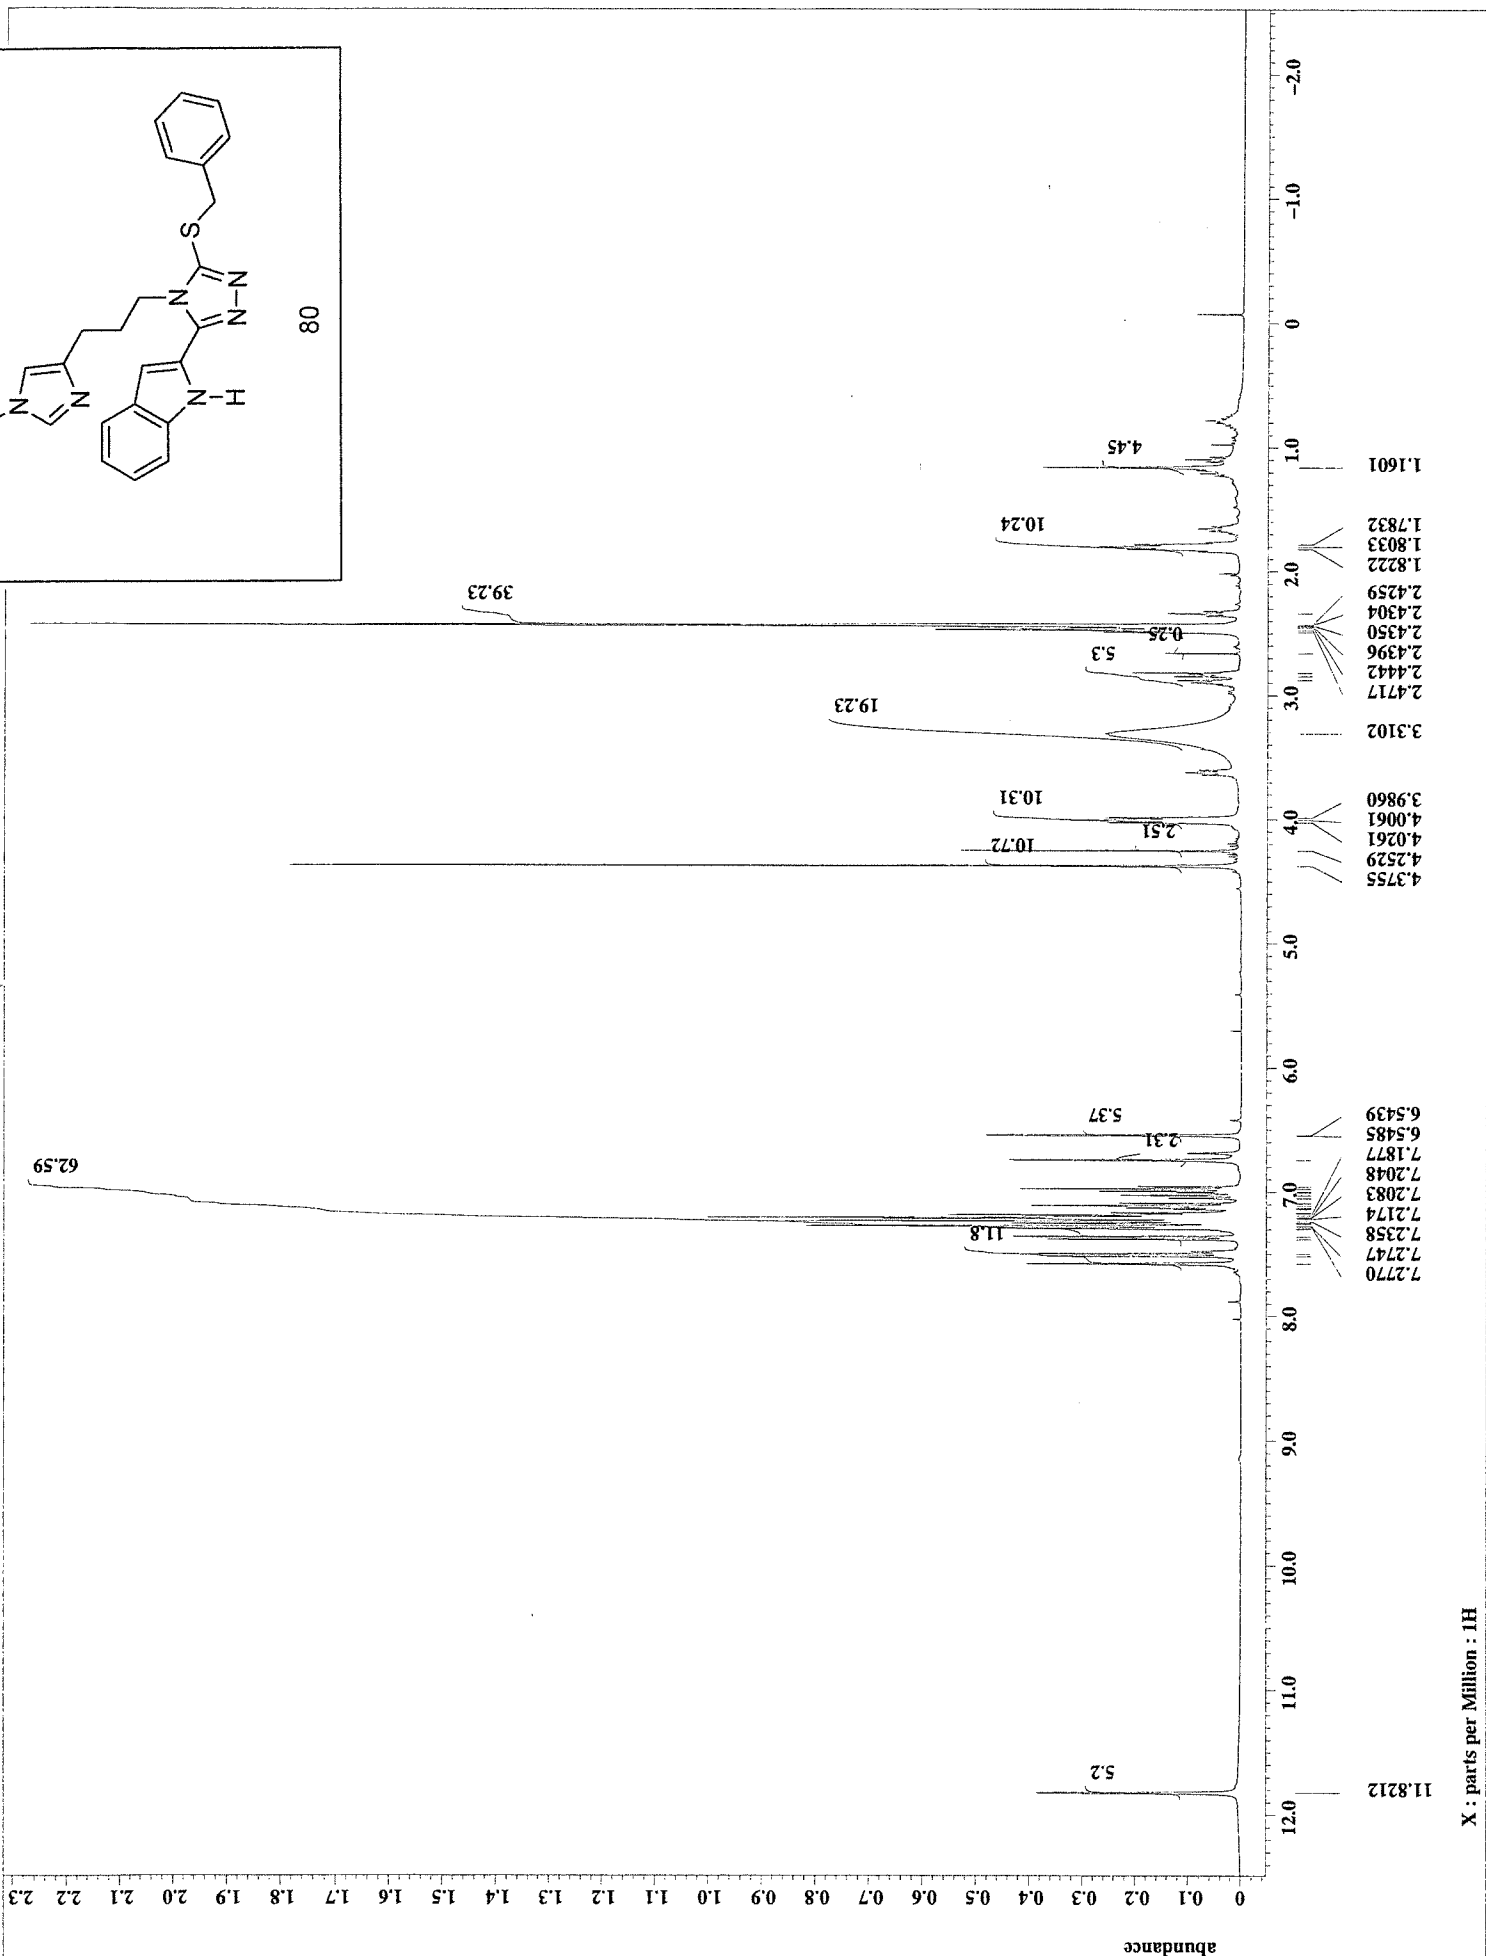

X : parts per Million : 1H

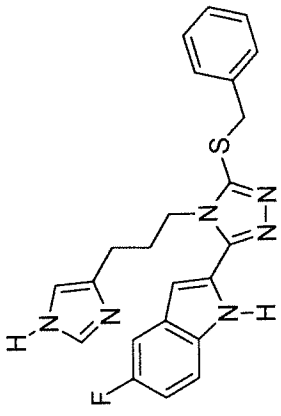

81

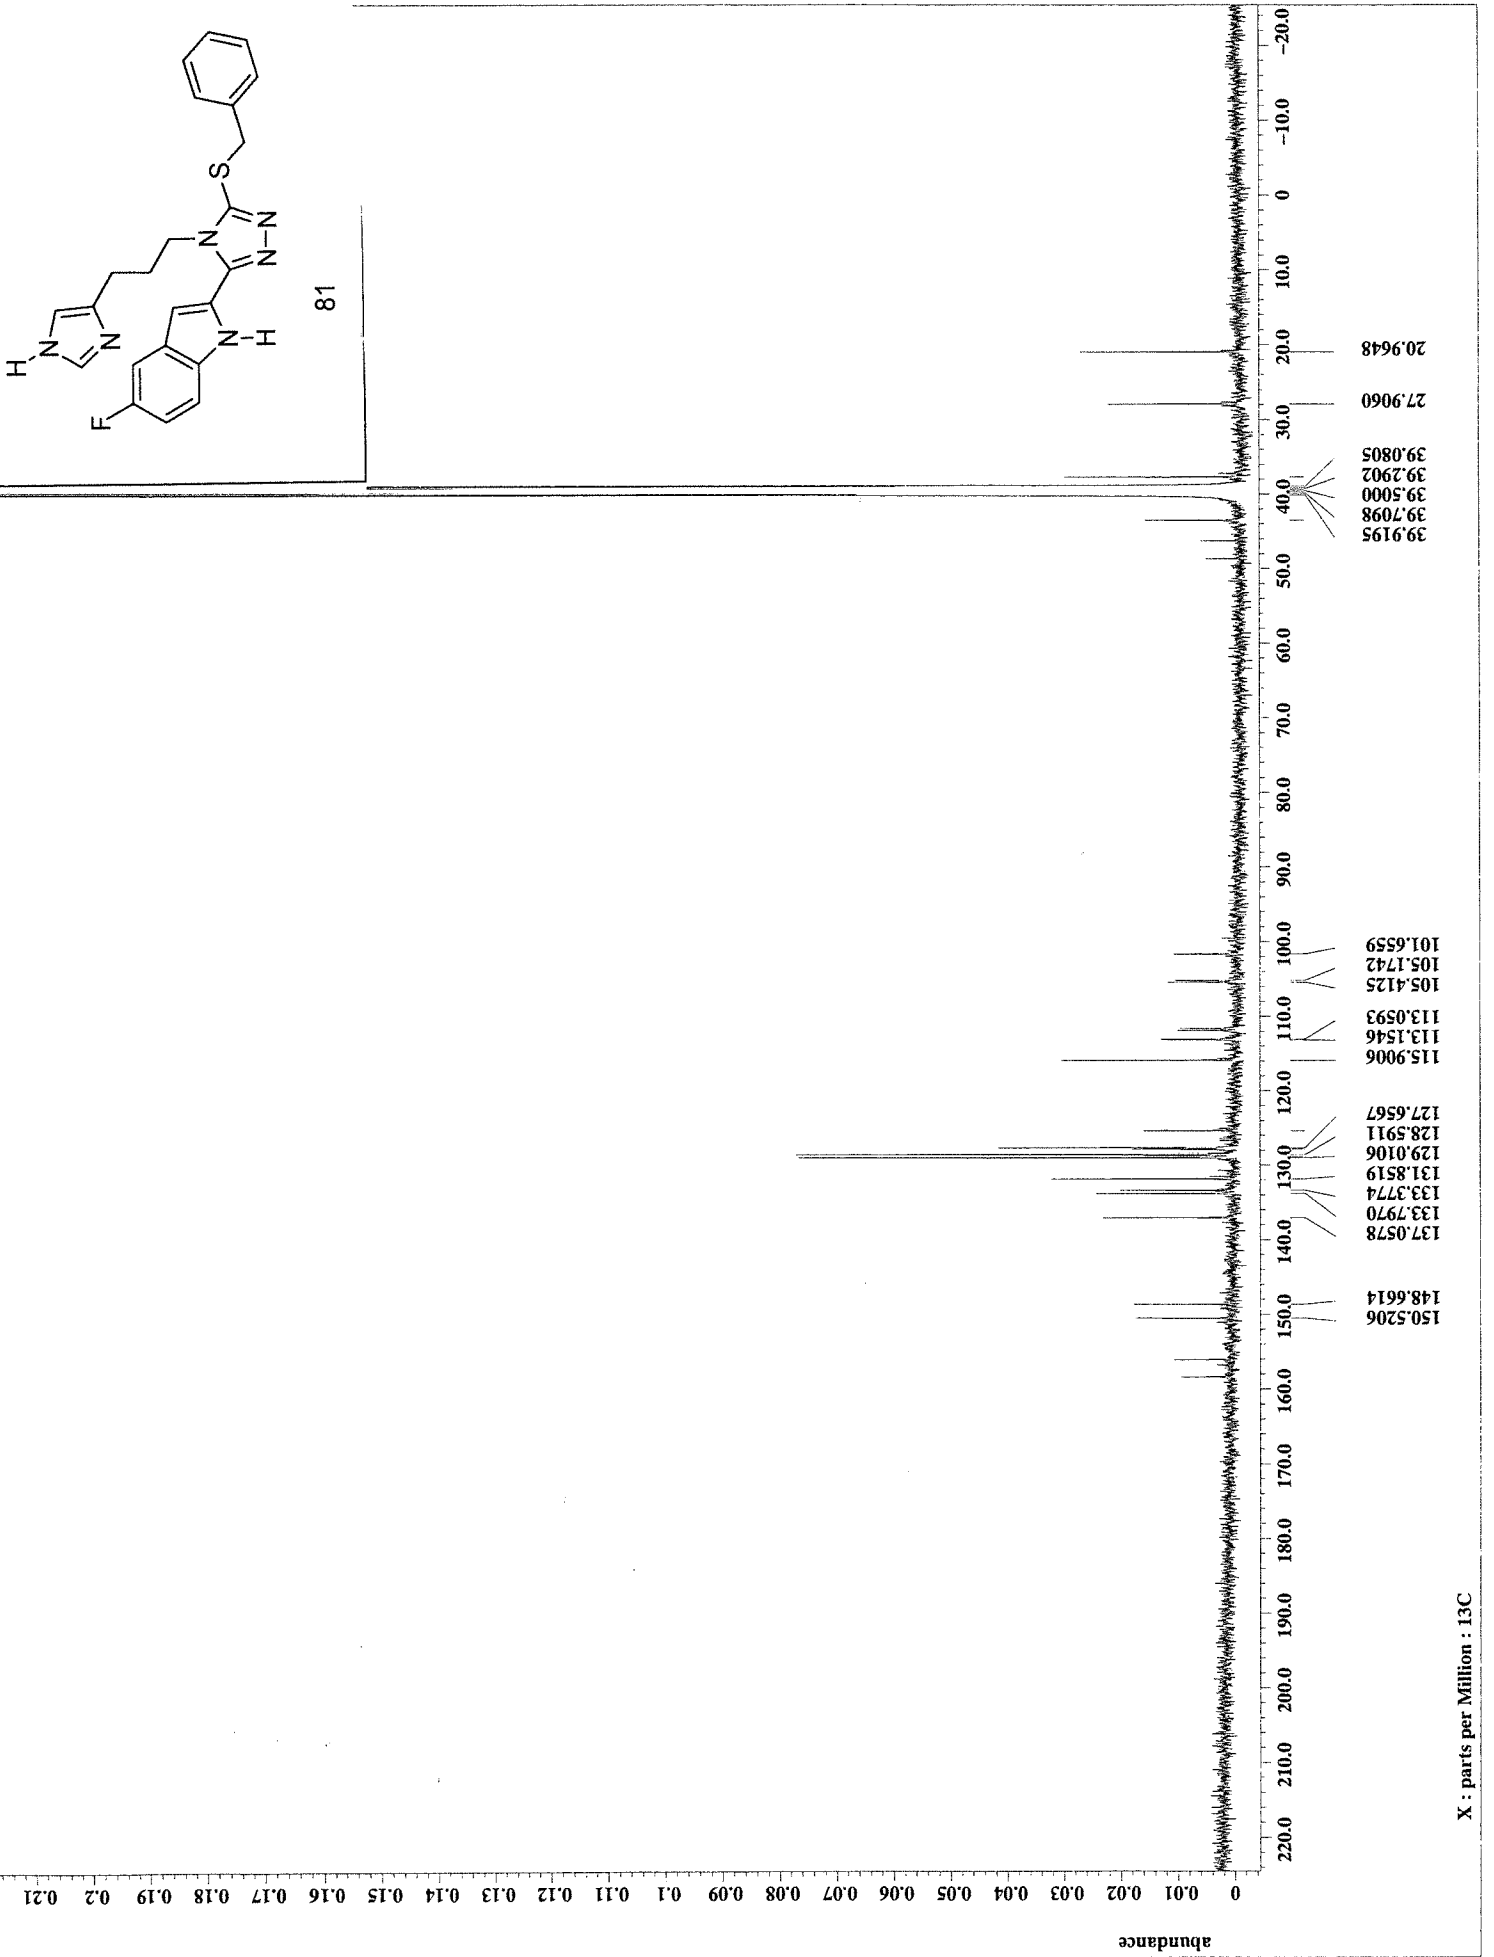

X : parts per Million : 13C



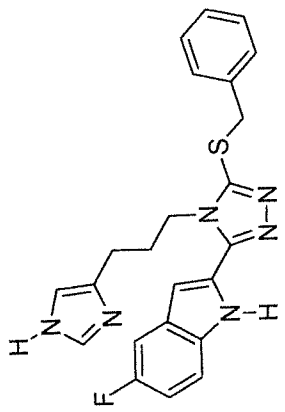

81

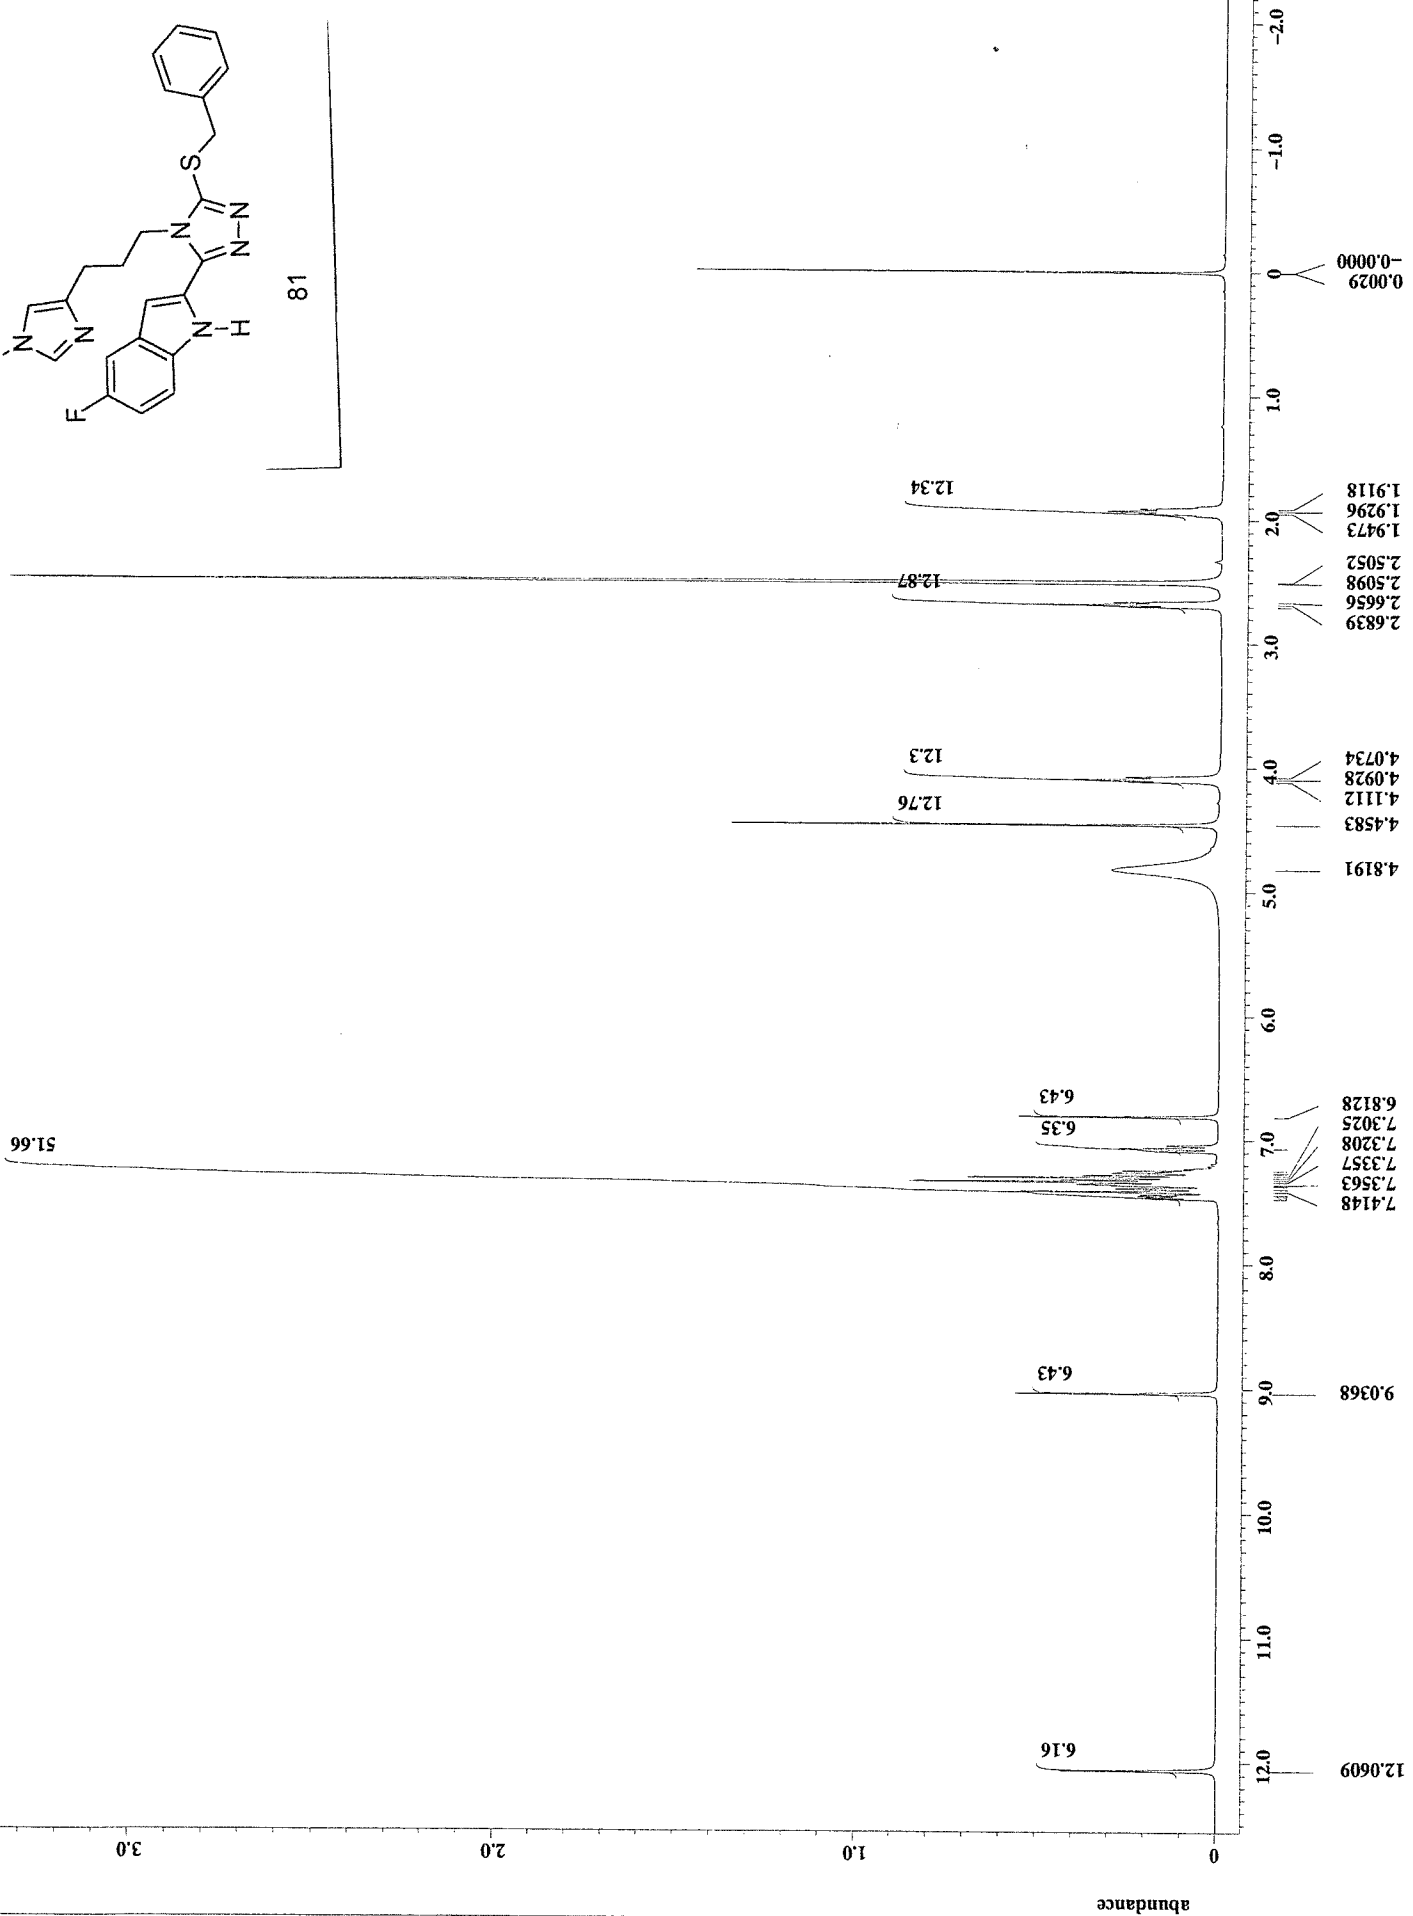

$\text{H}$  : parts per Million :  $\text{H}$

abundance

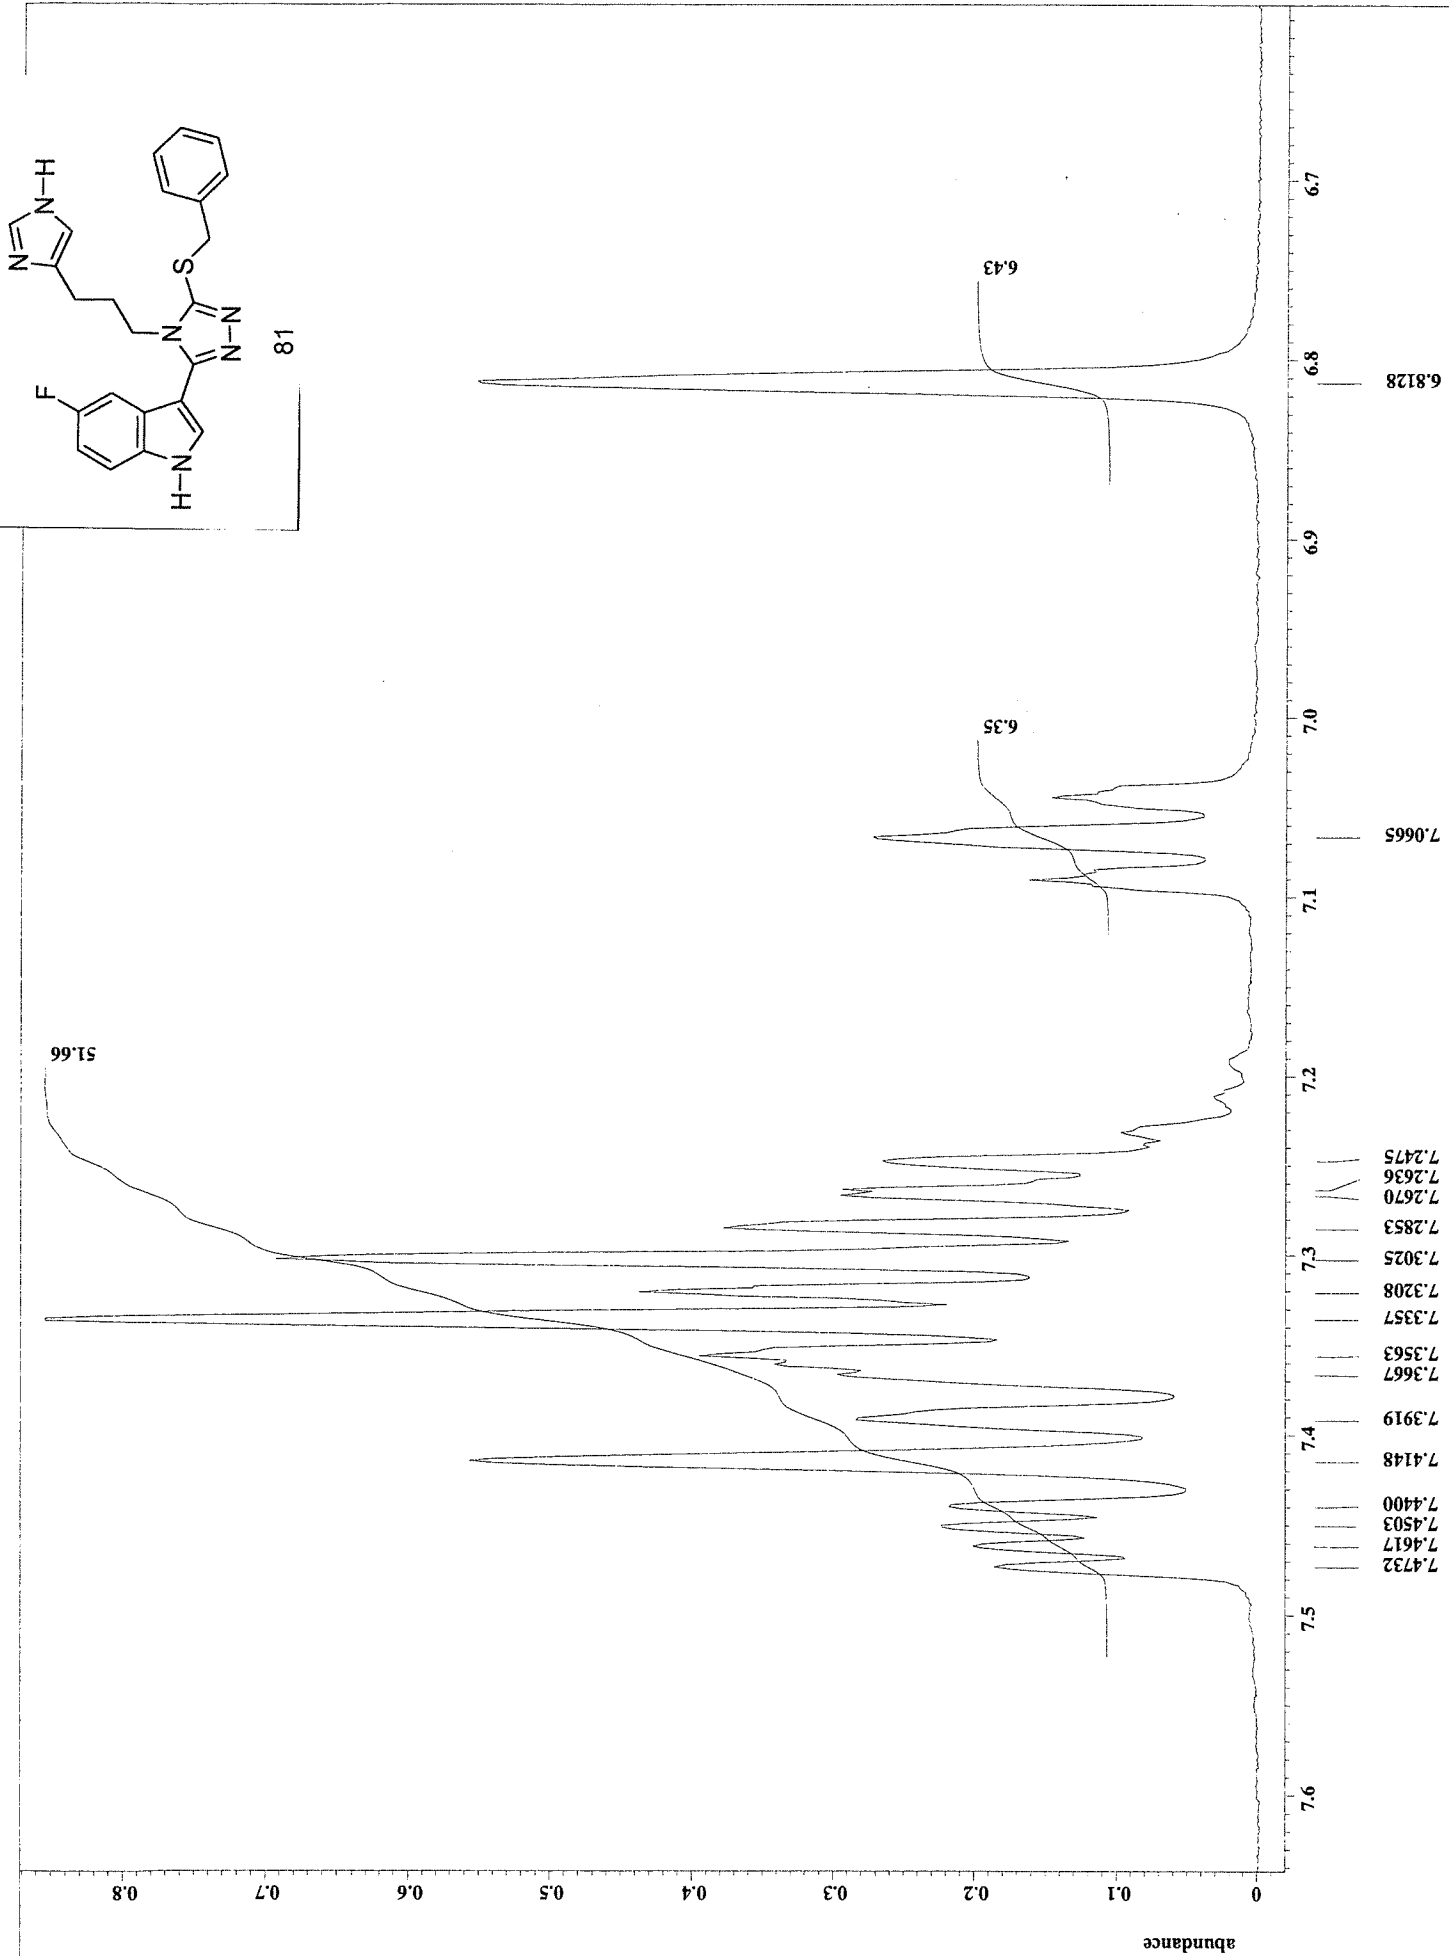

X : parts per Million : 1H



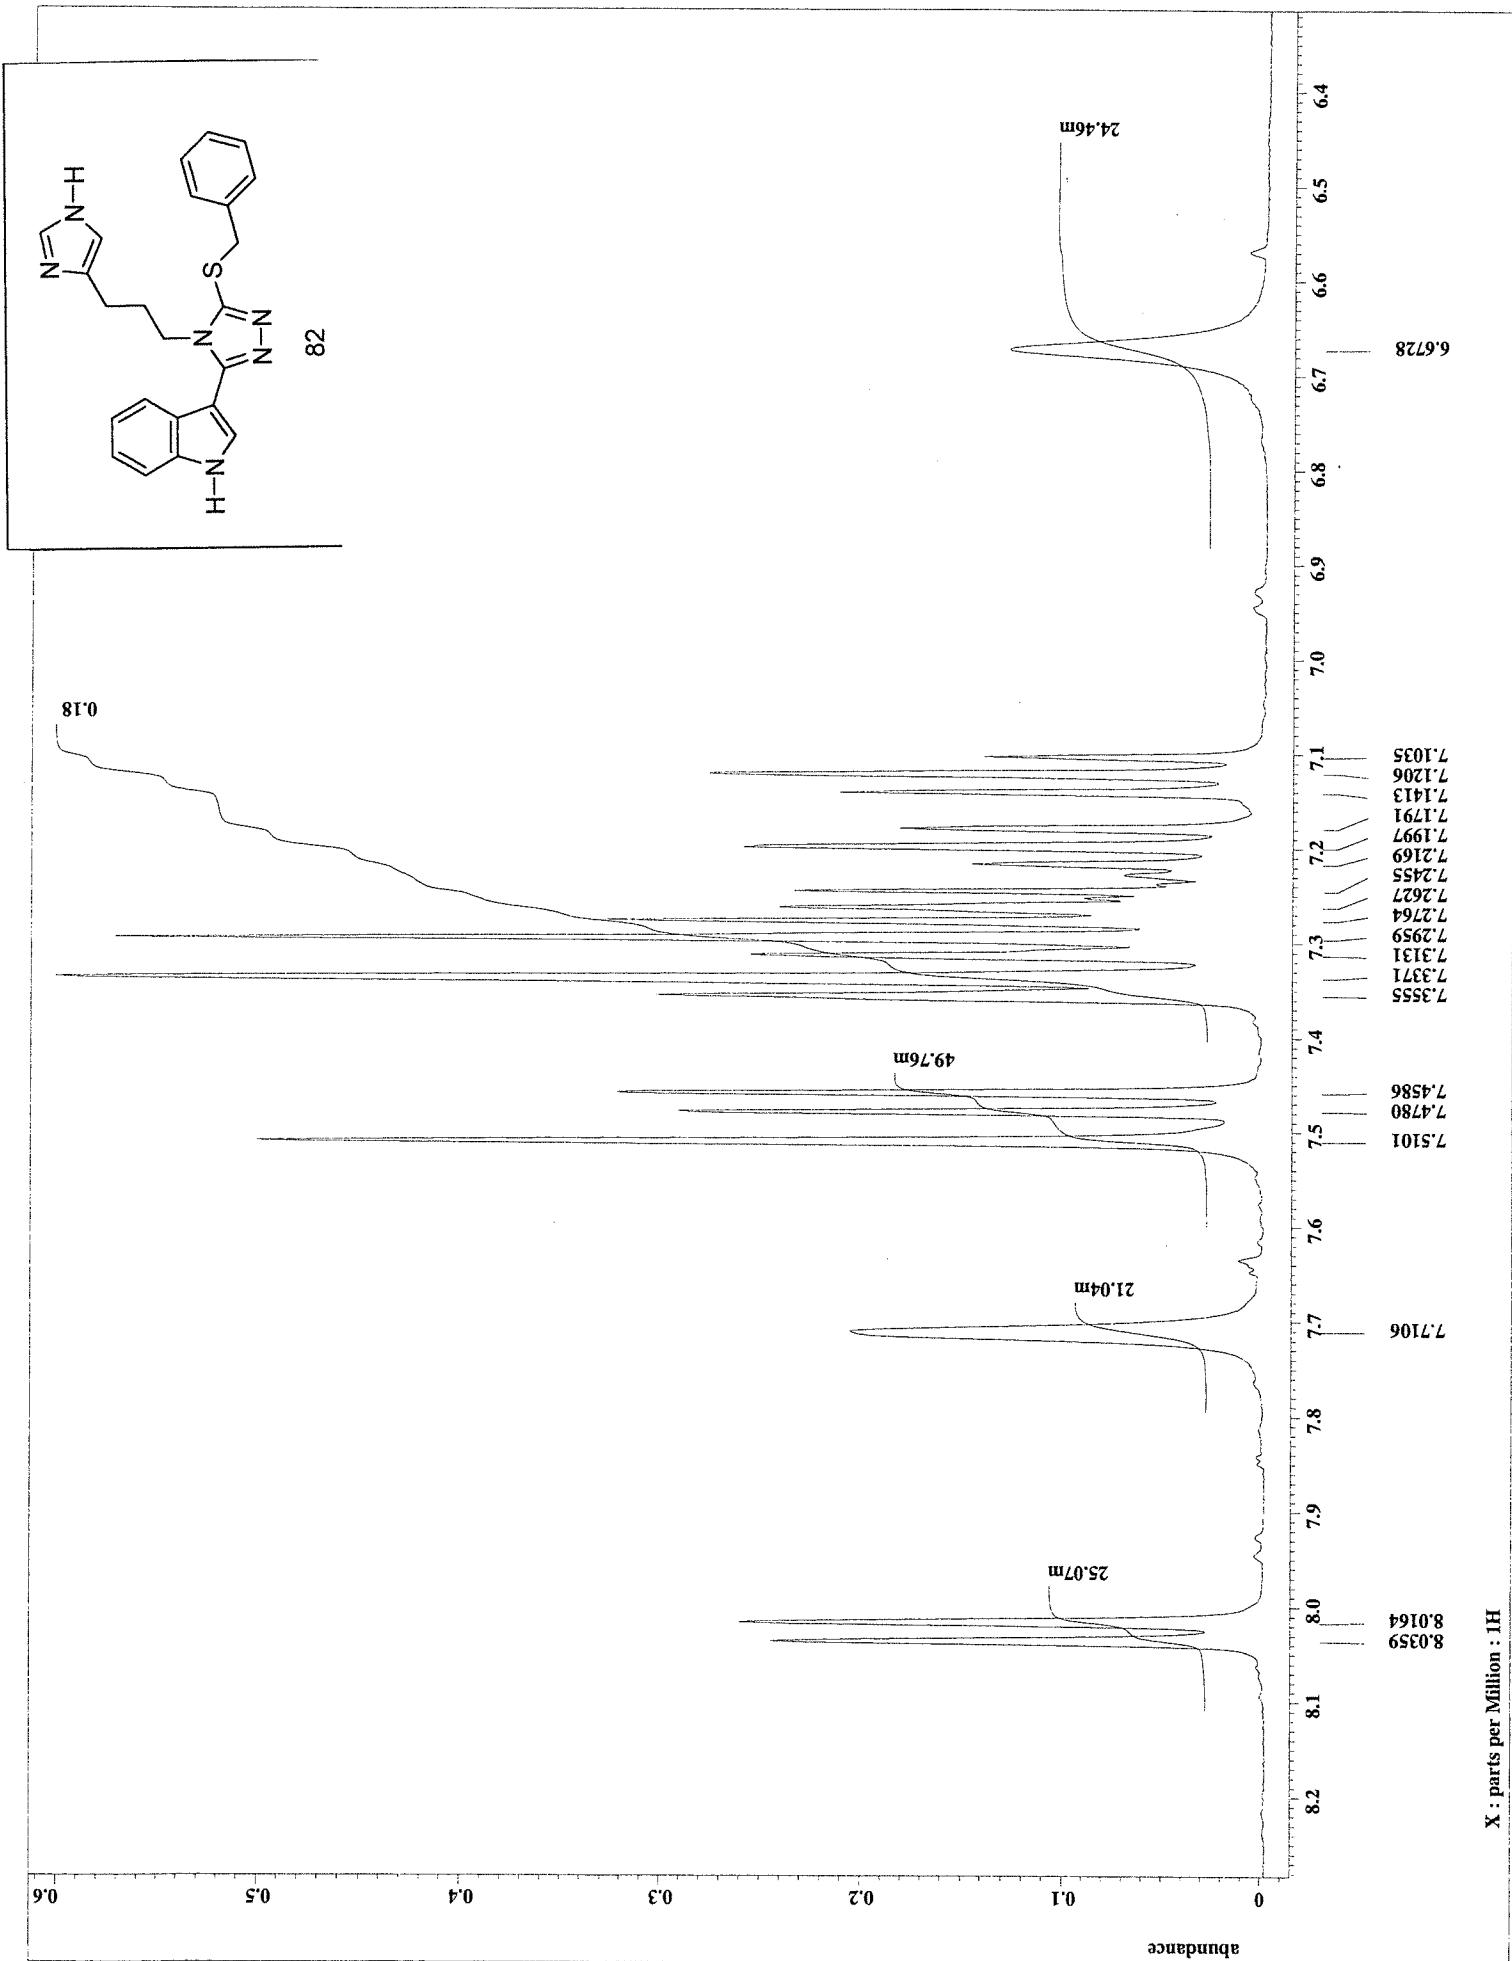

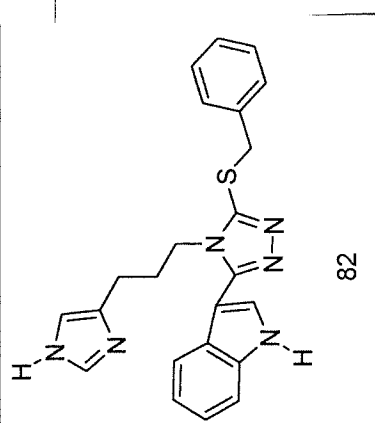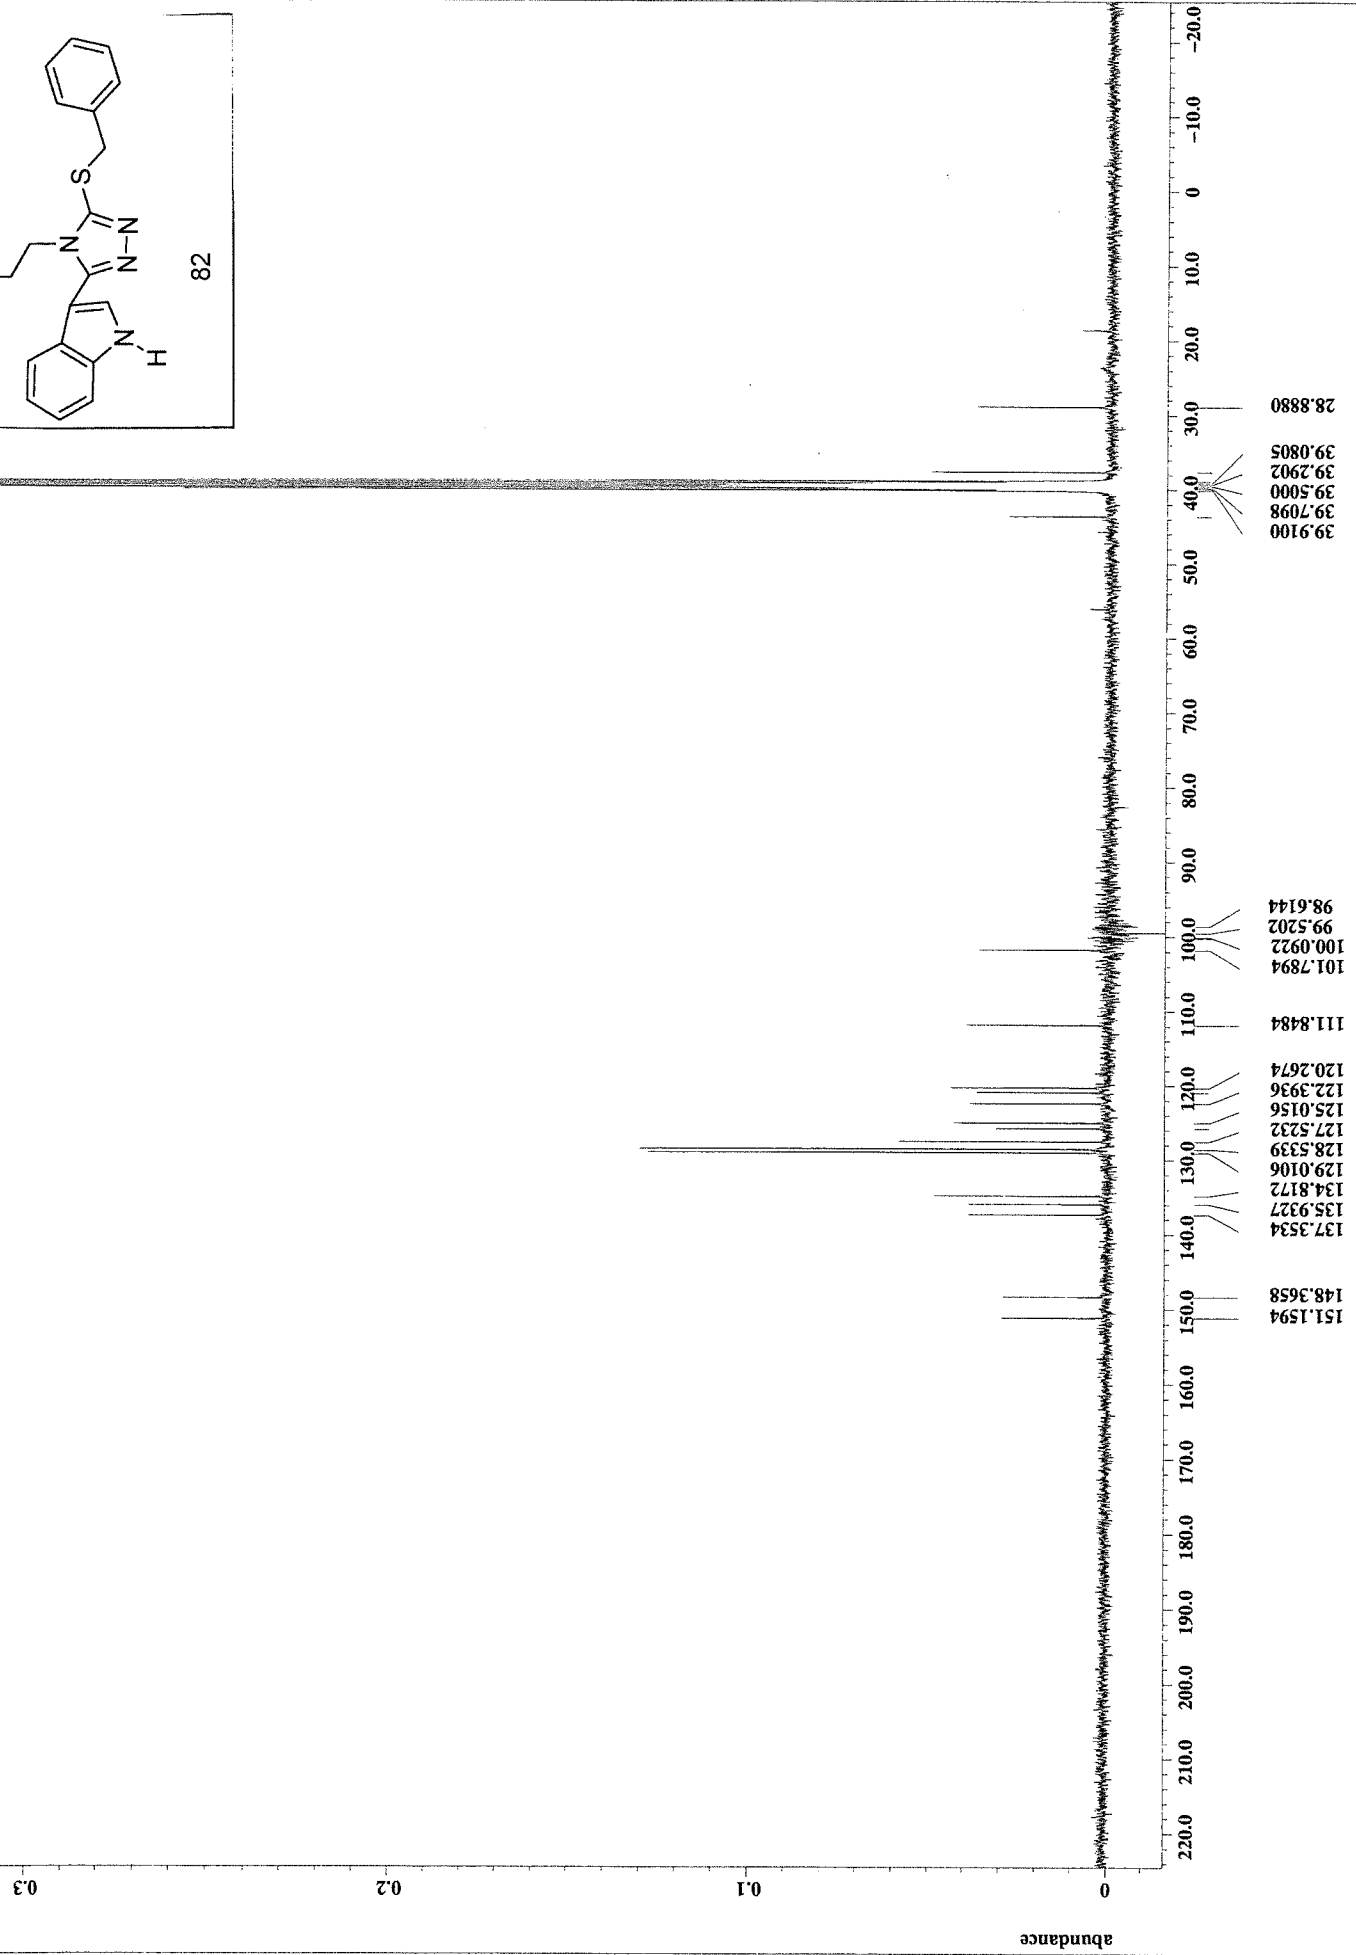

X : parts per Million : 13C

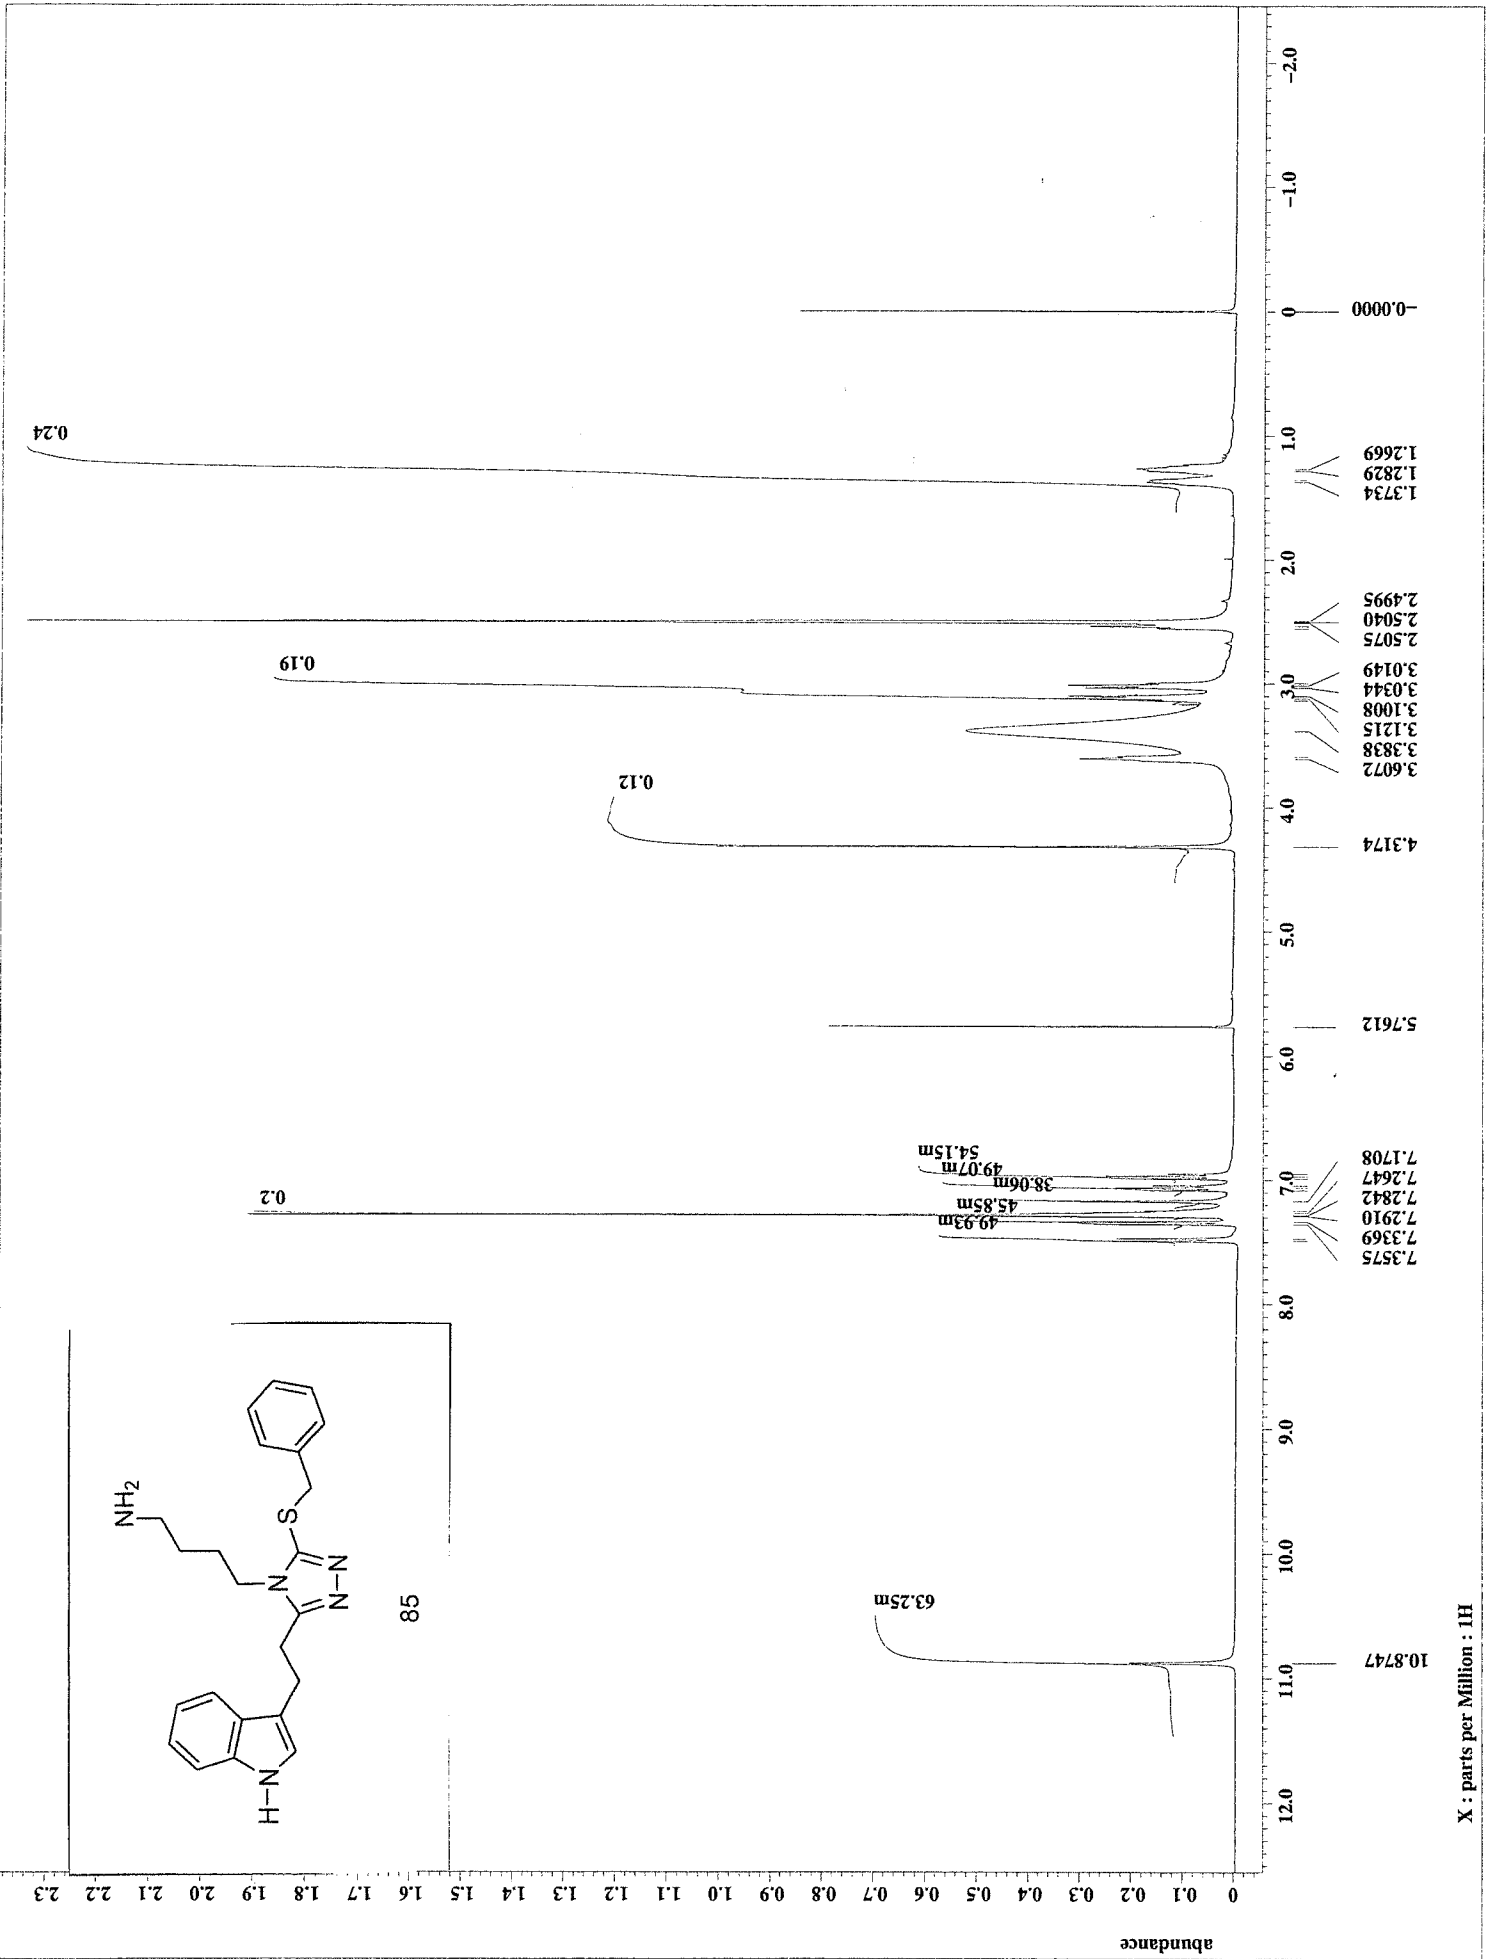

X : parts per Million : 1H

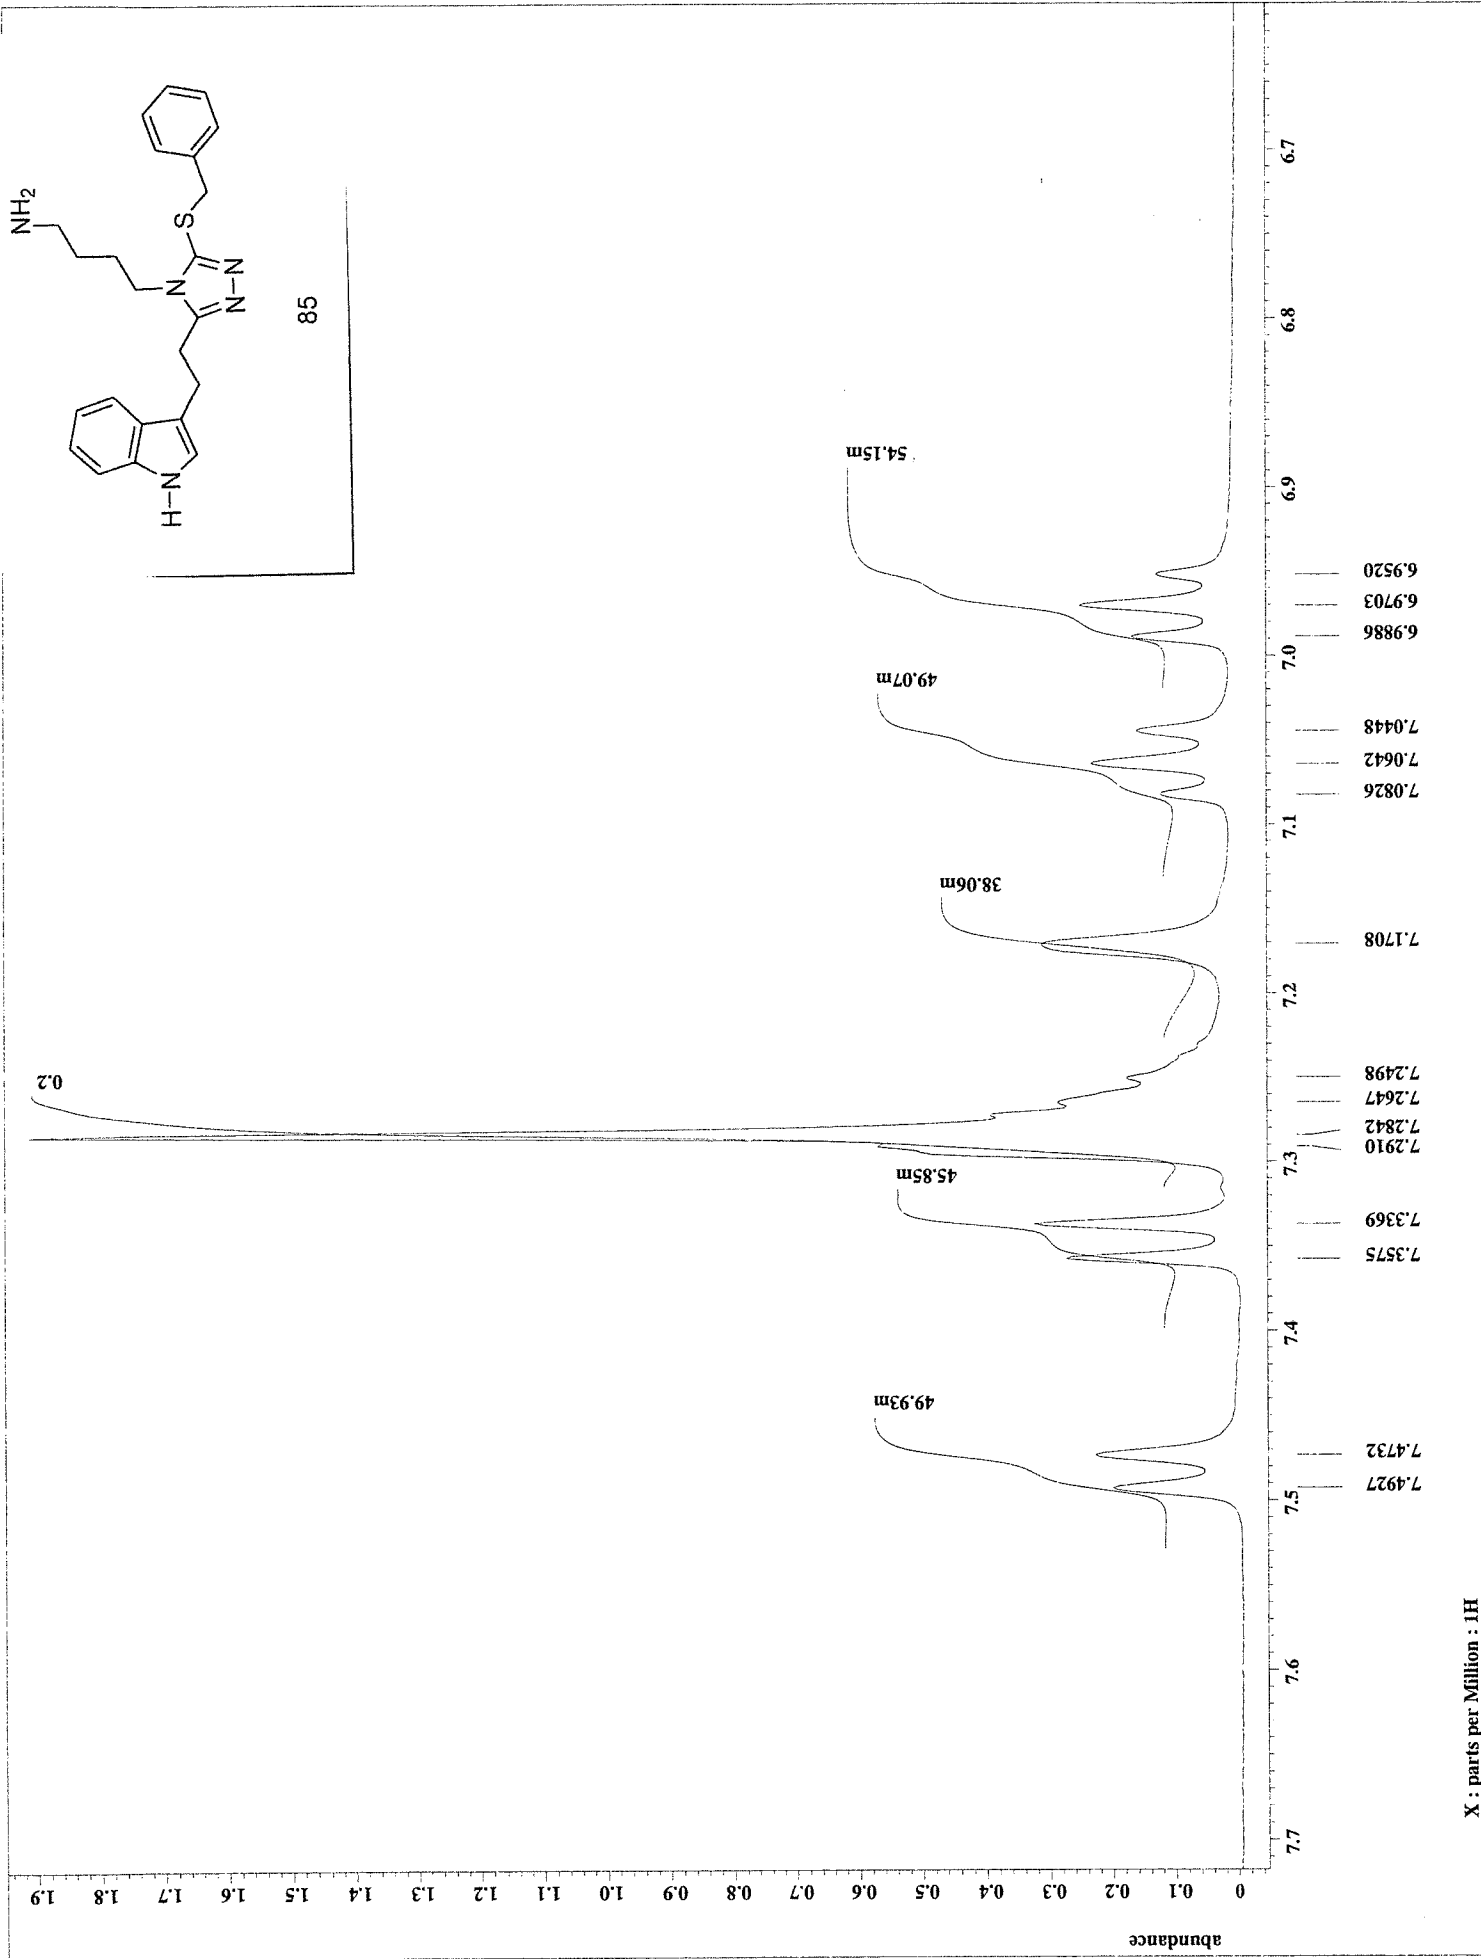

X : parts per Million : 1H

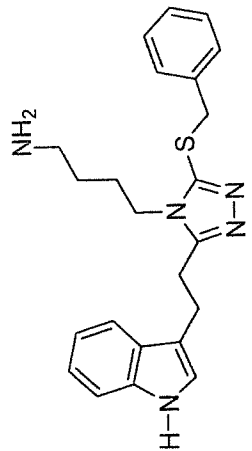

85

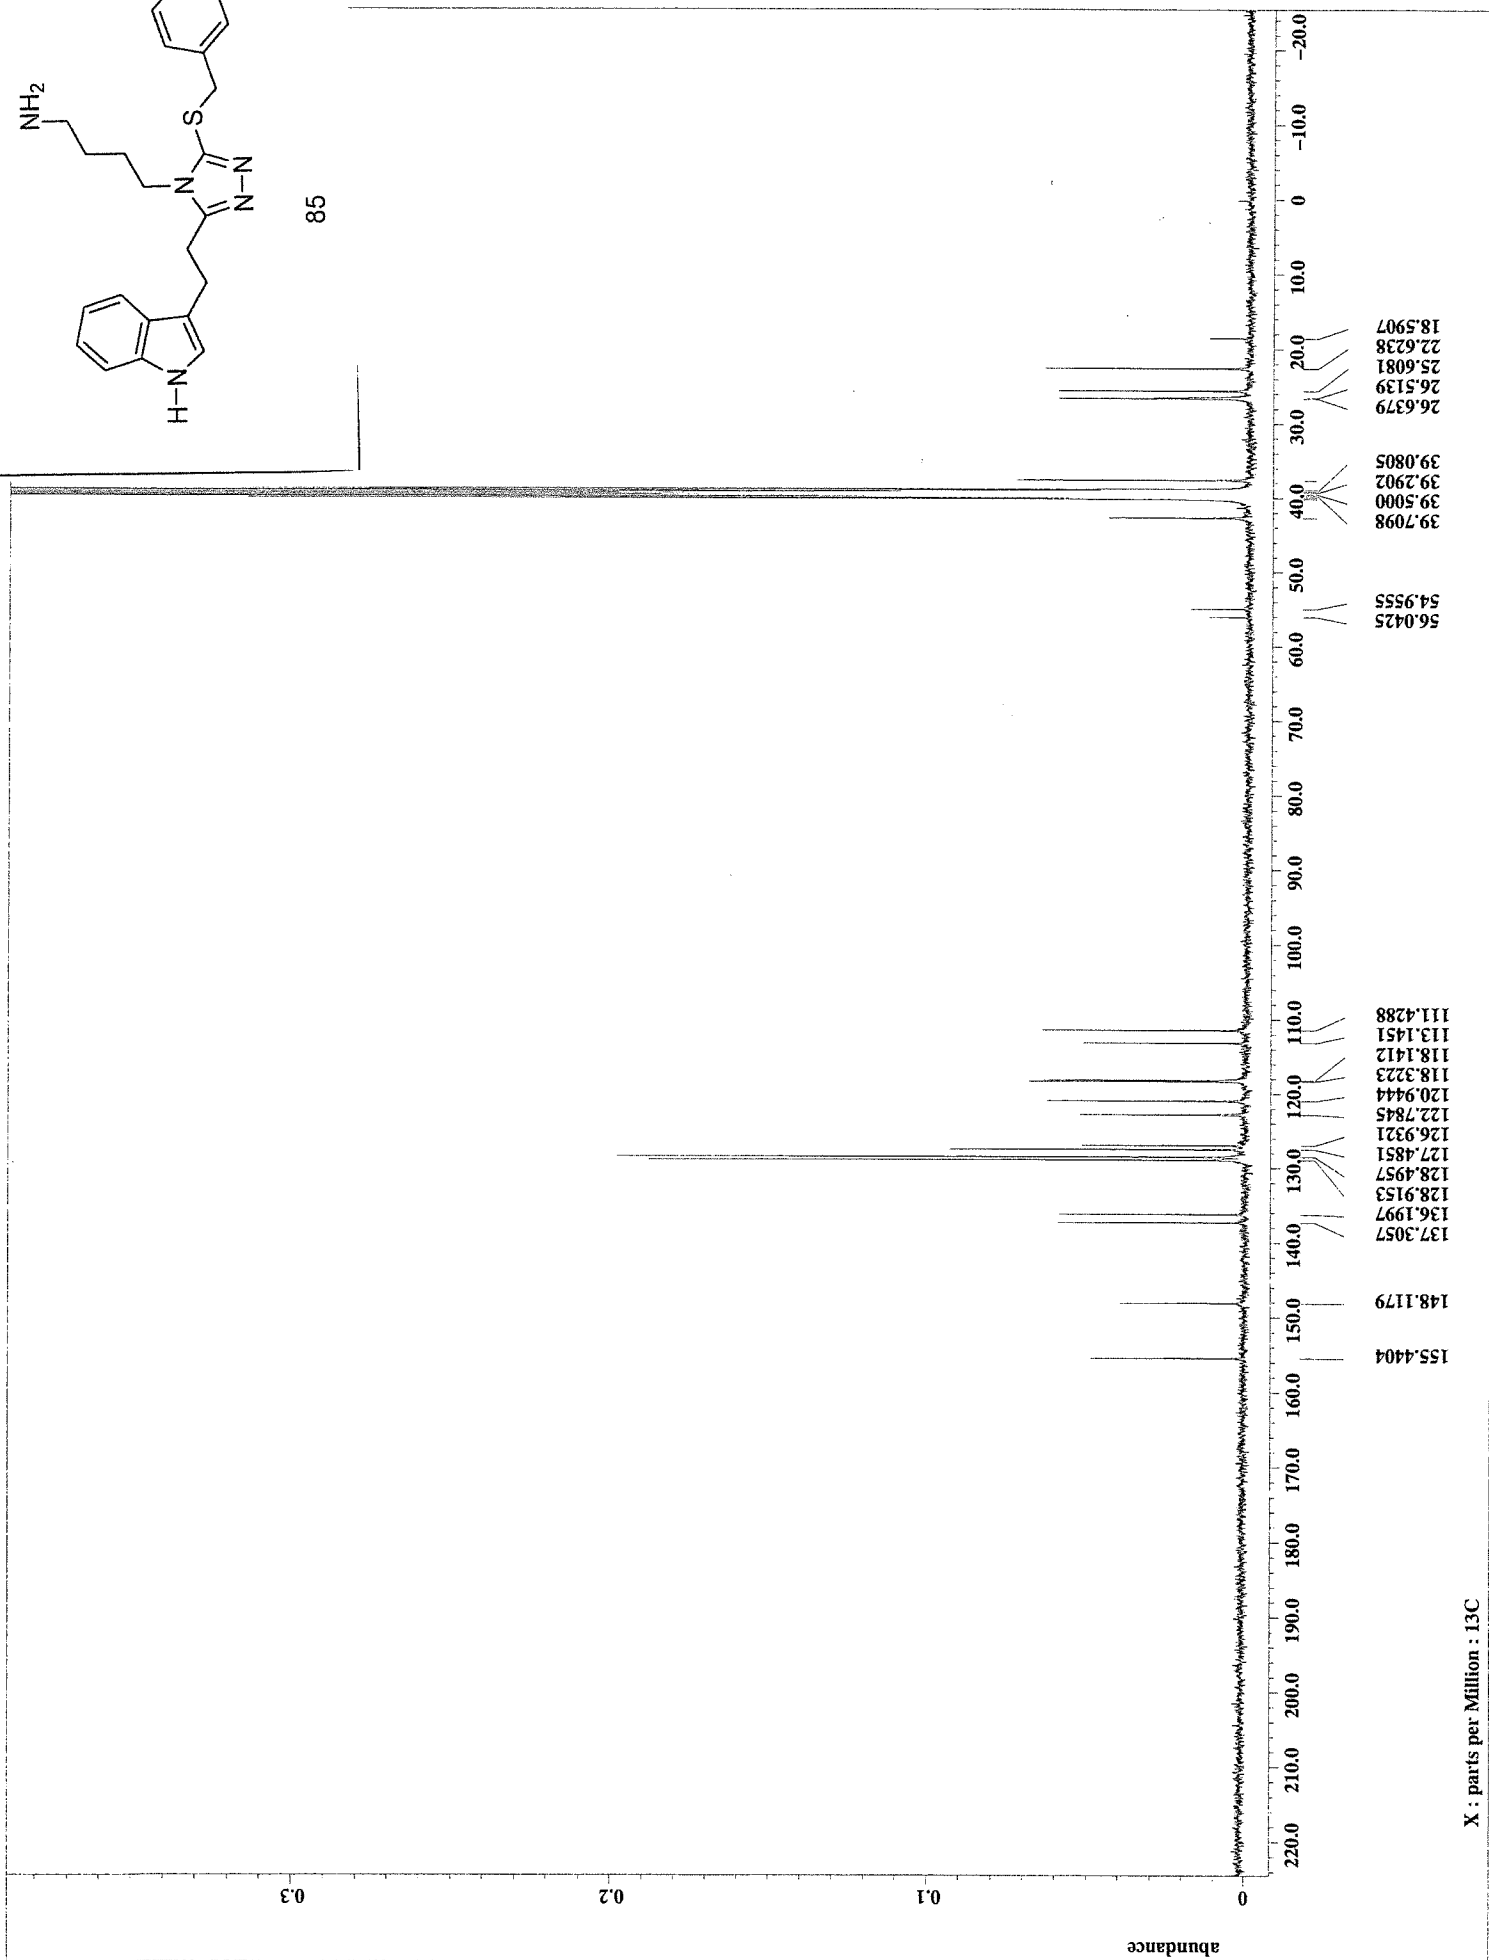



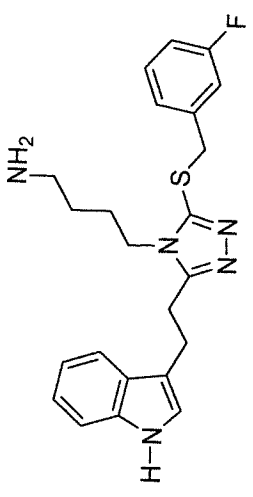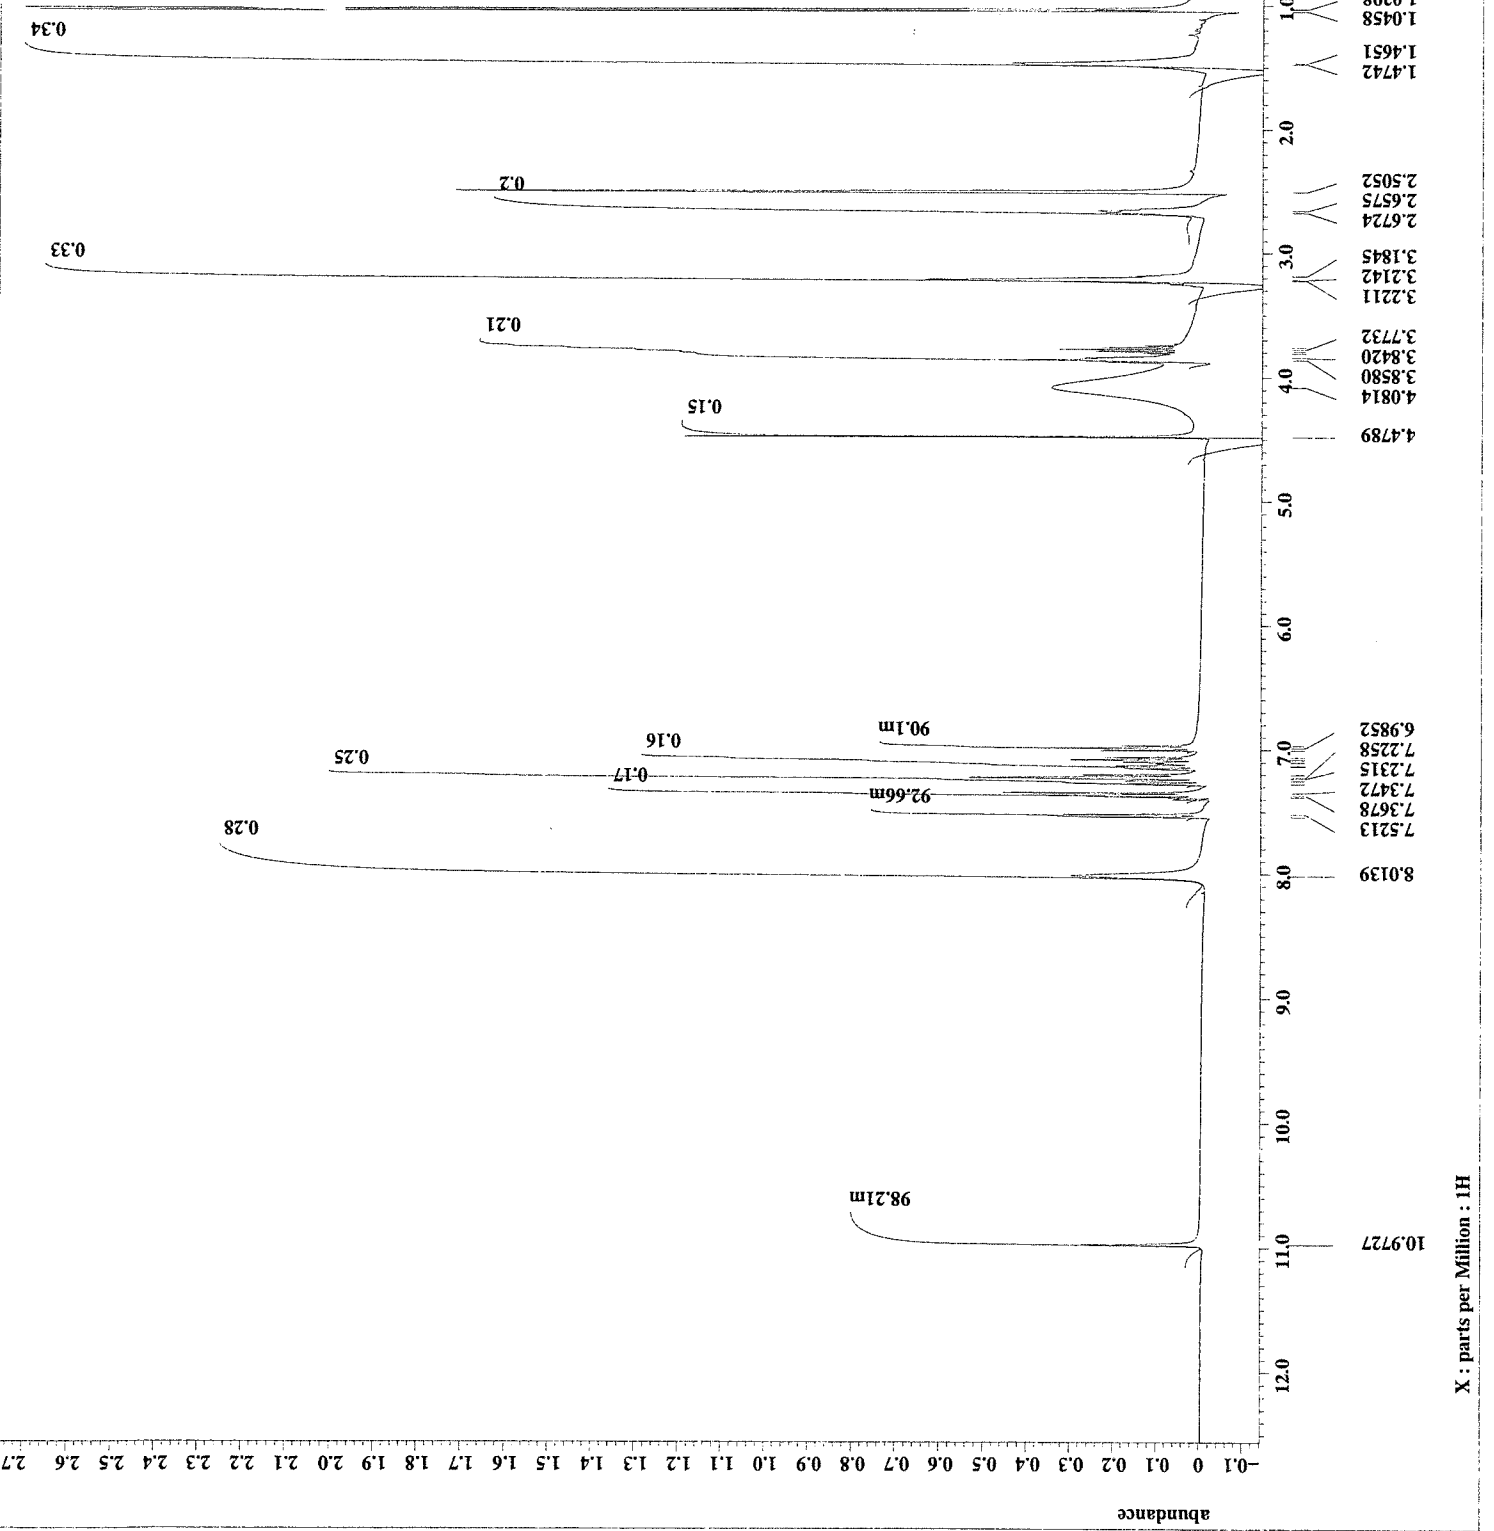

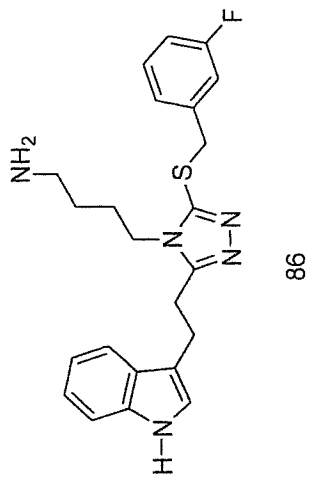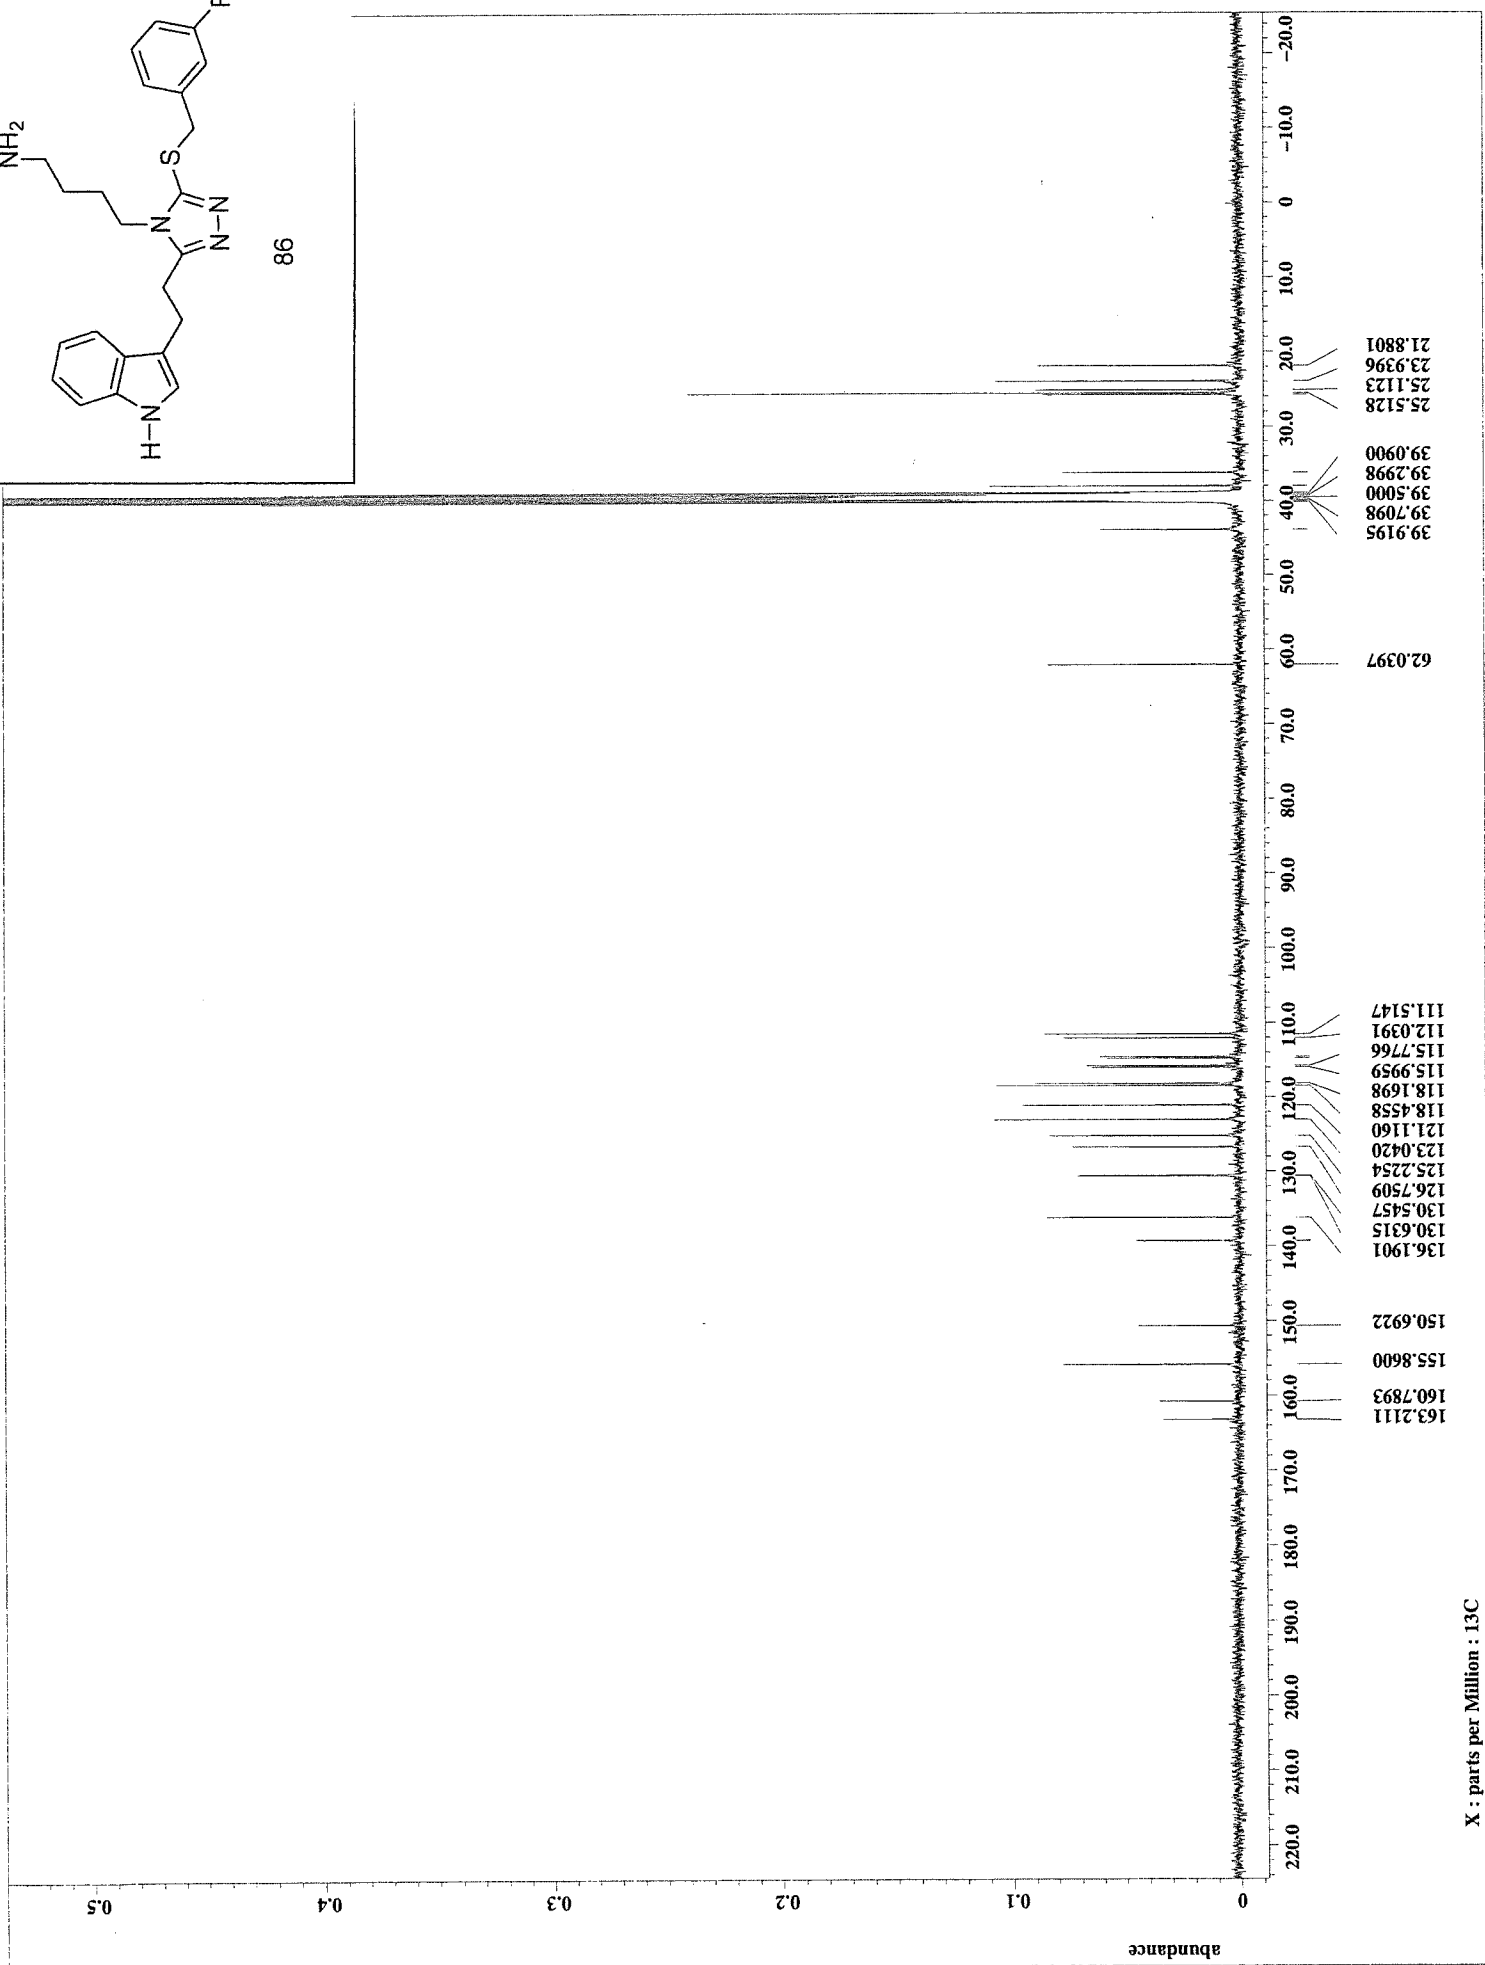

X : parts per Million : 13C

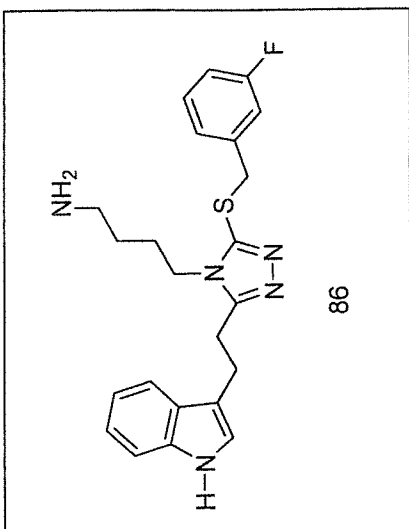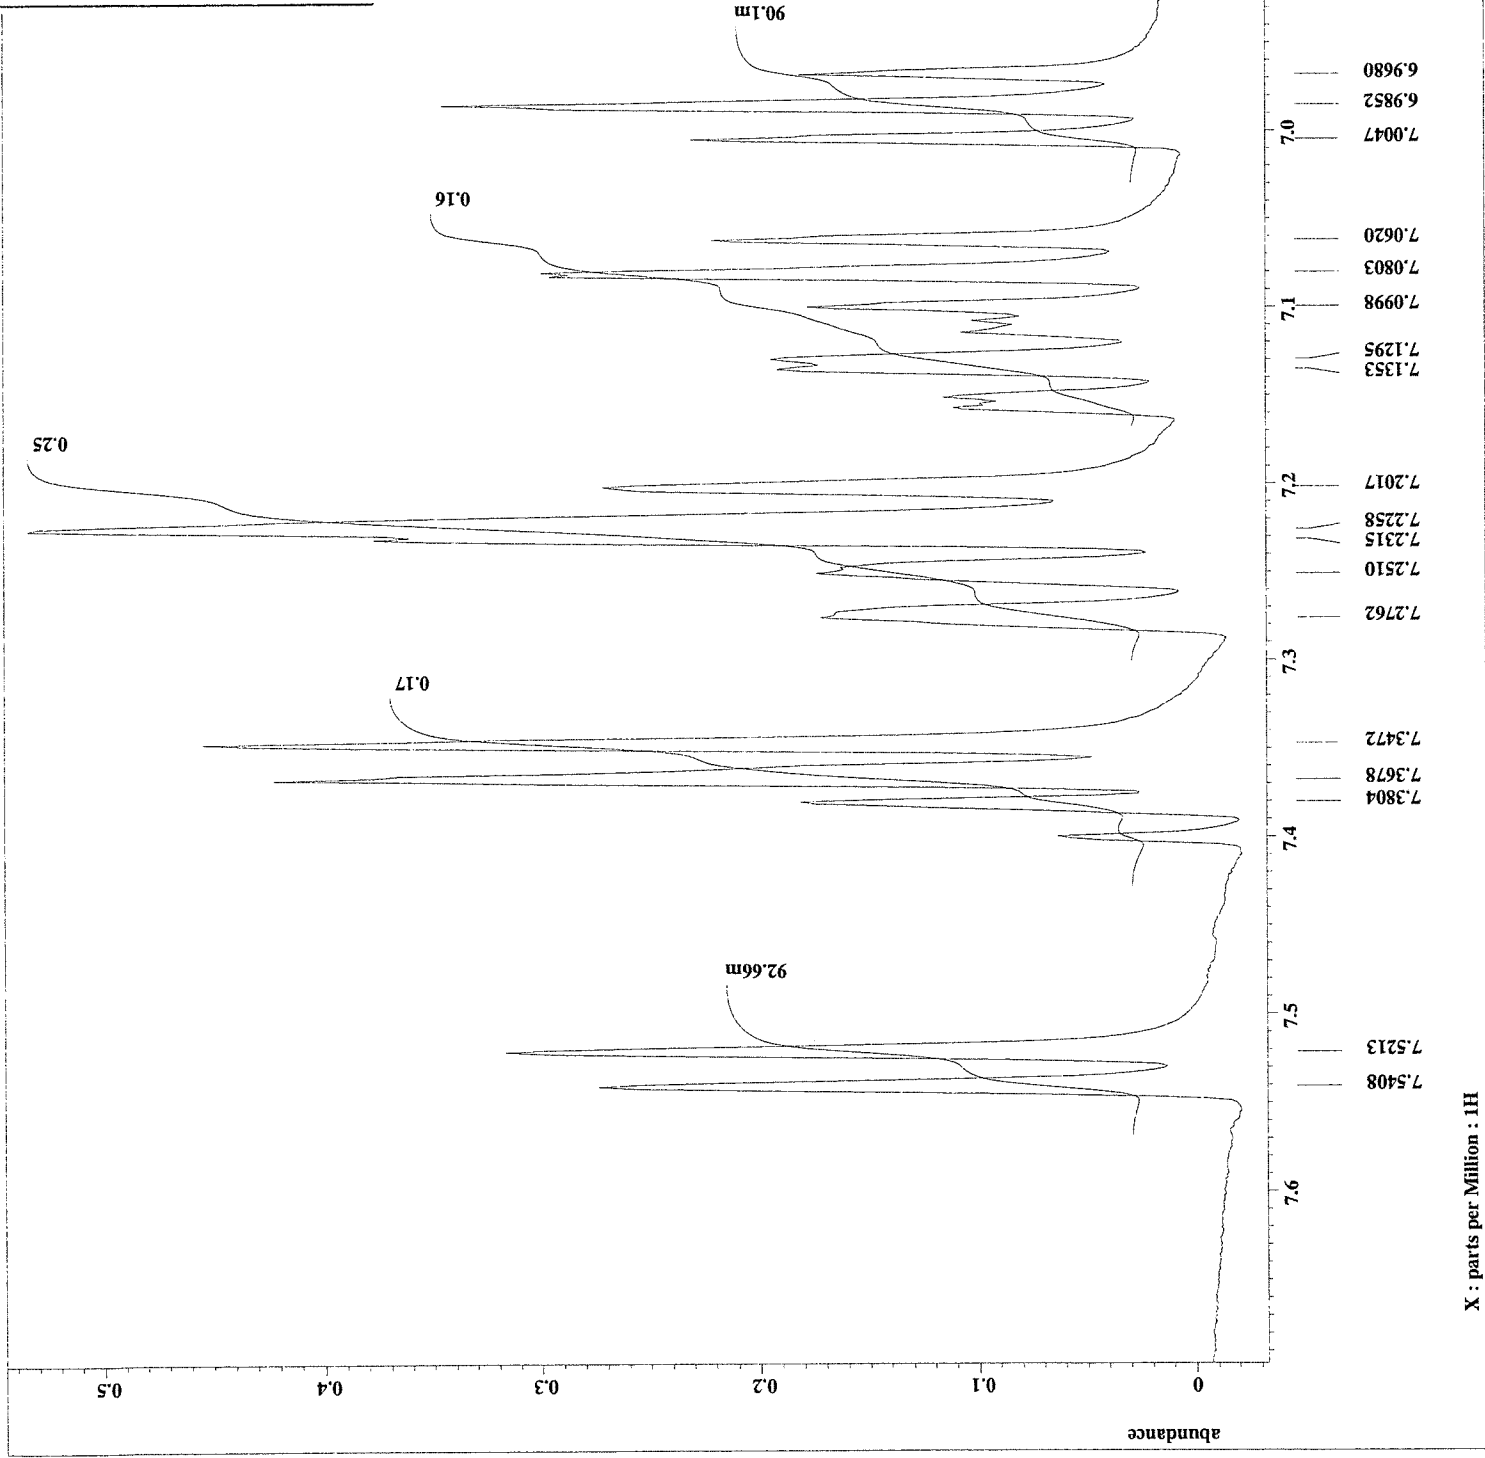

X : parts per Million : 1H

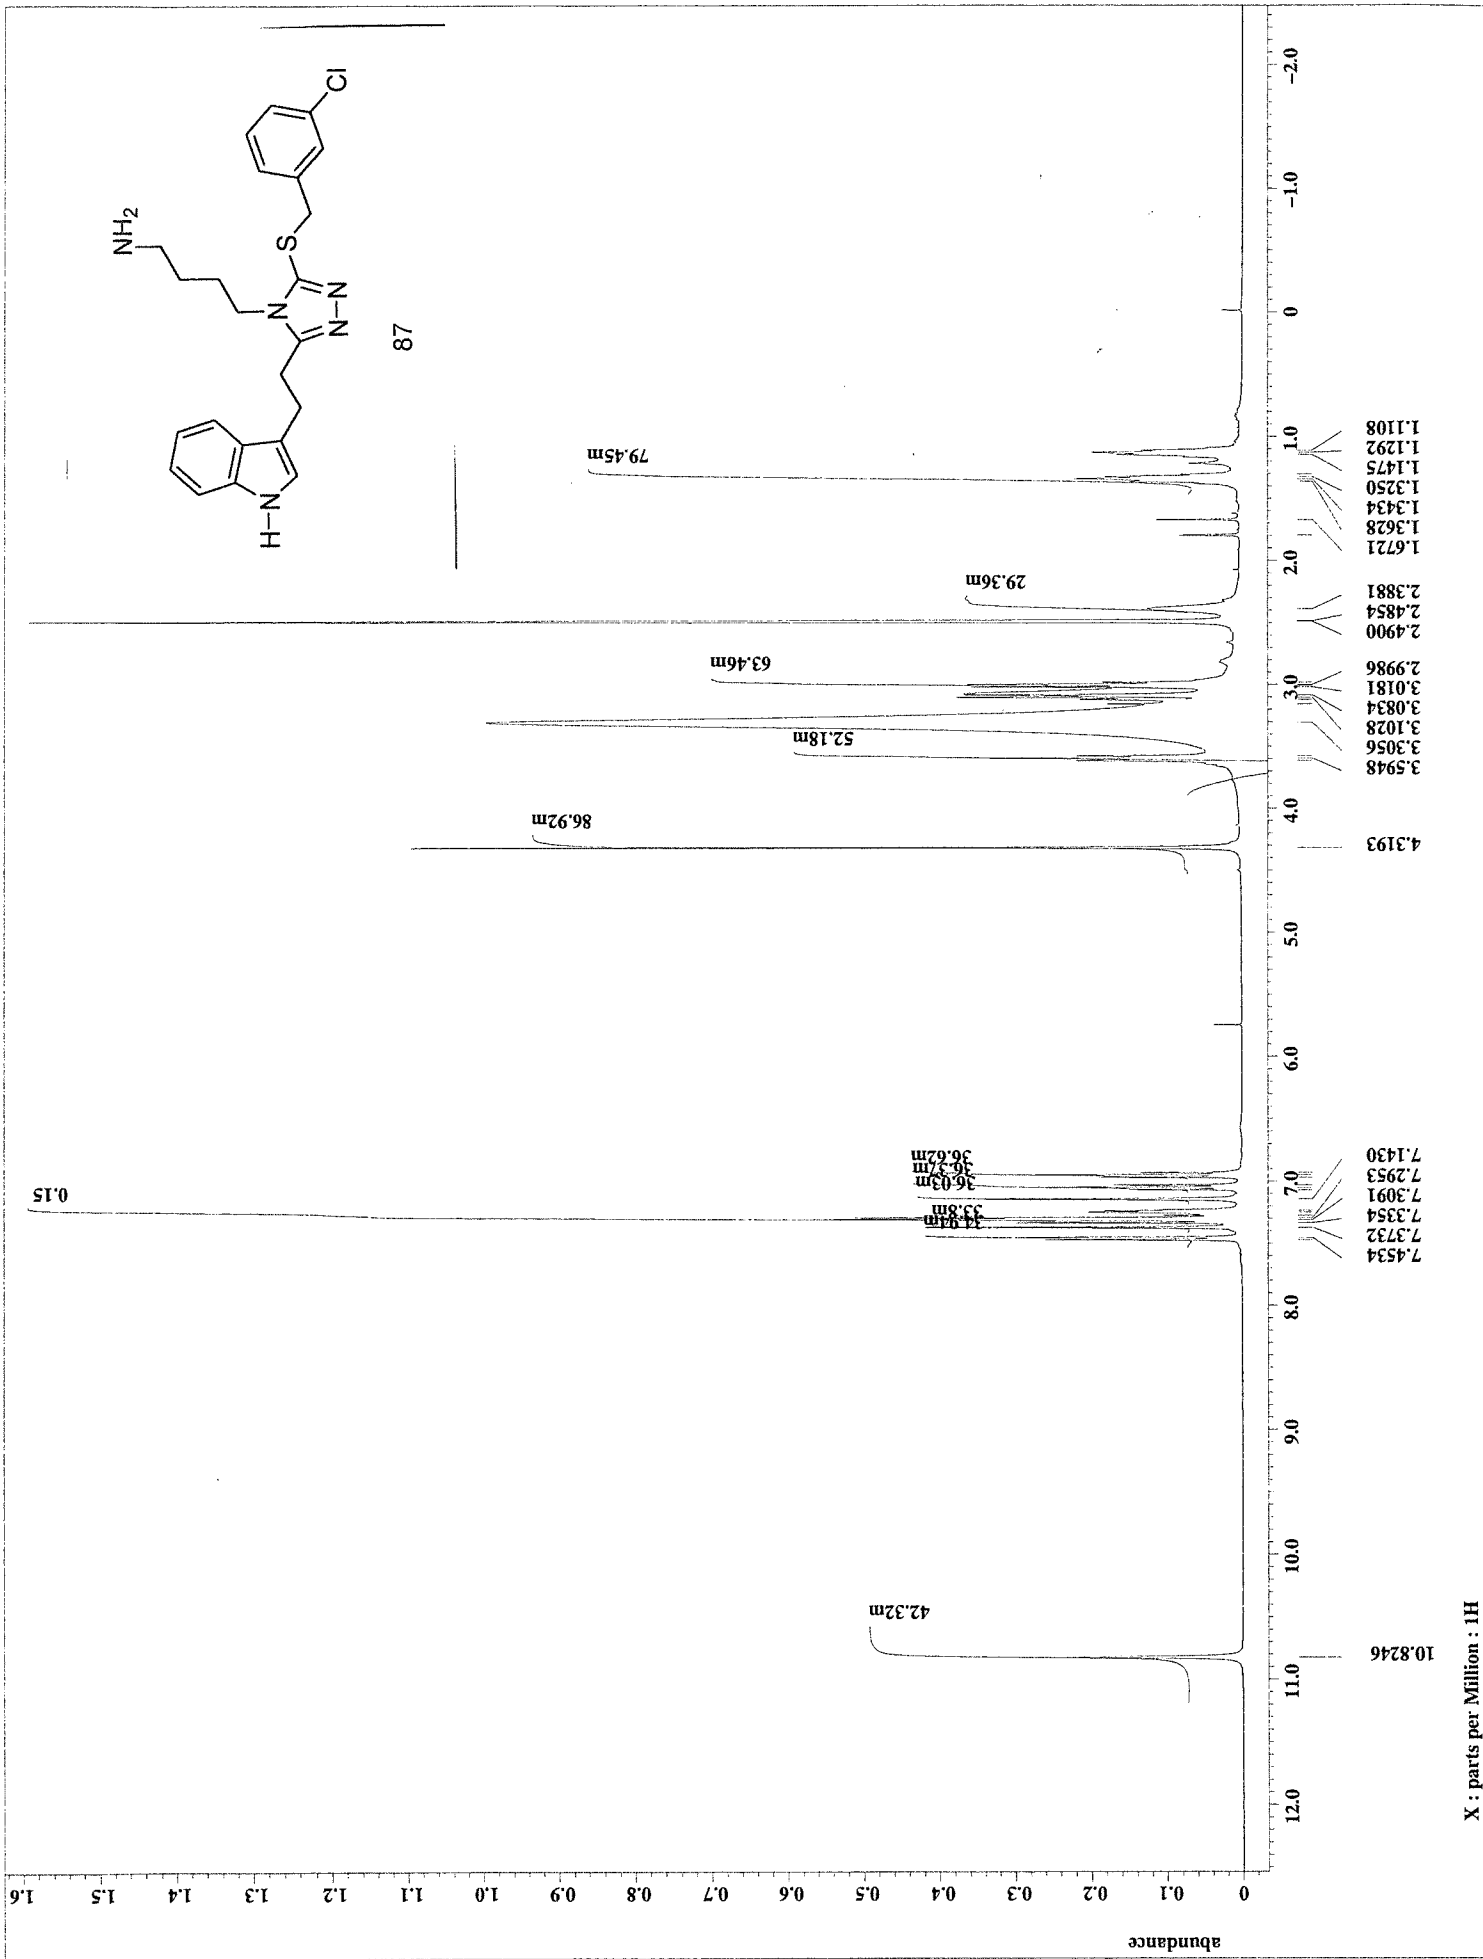

X : parts per Million : 1H

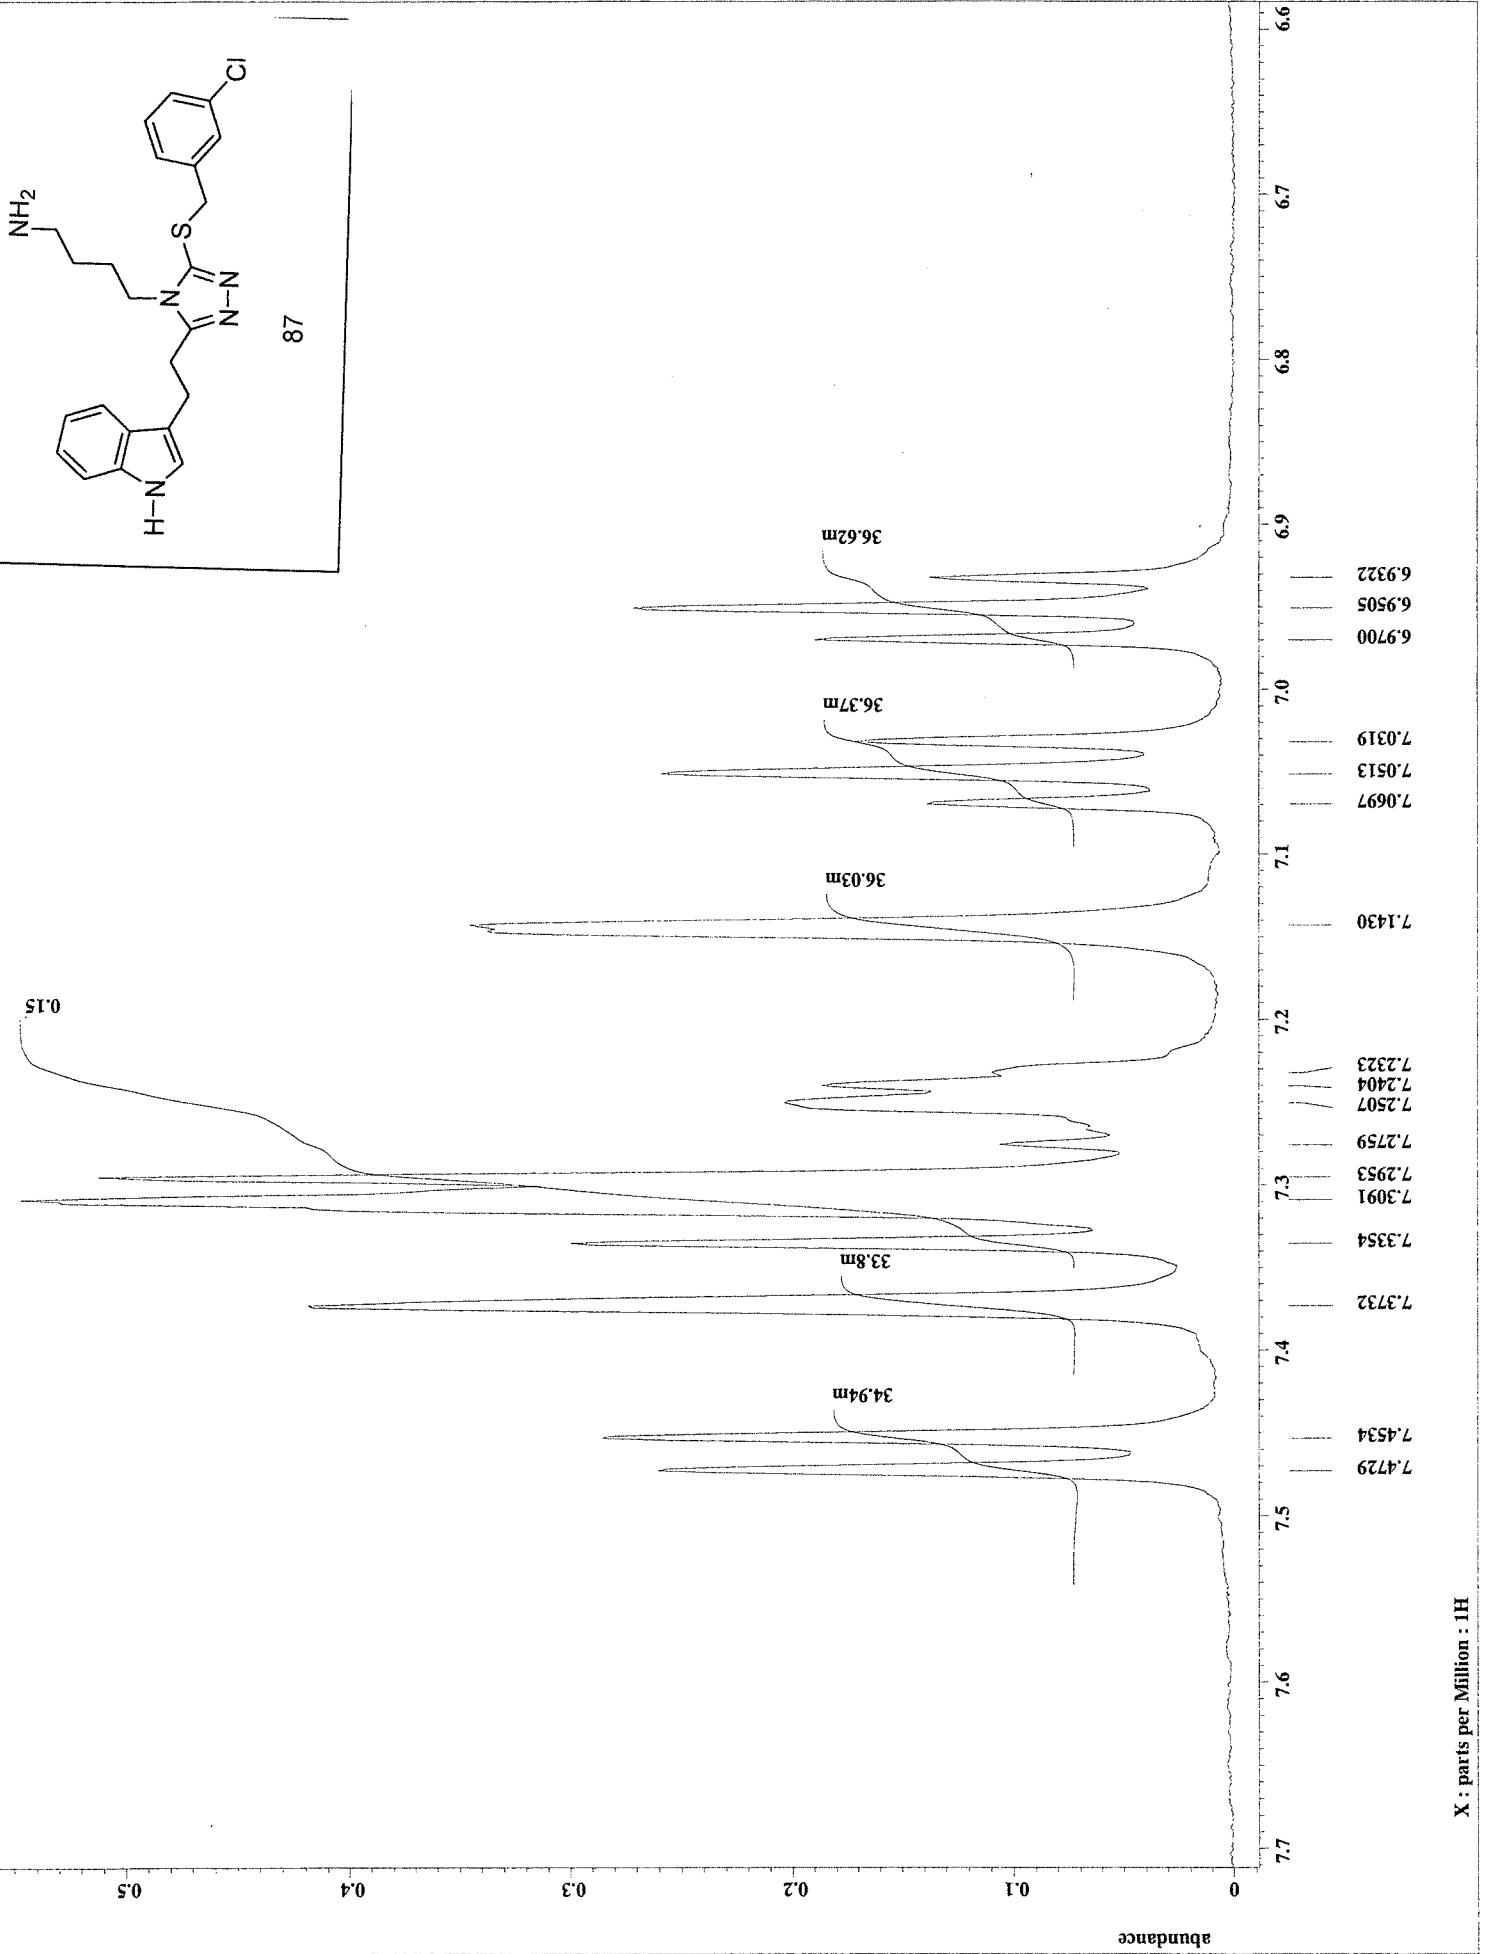

X : parts per Million : 1H

abundance

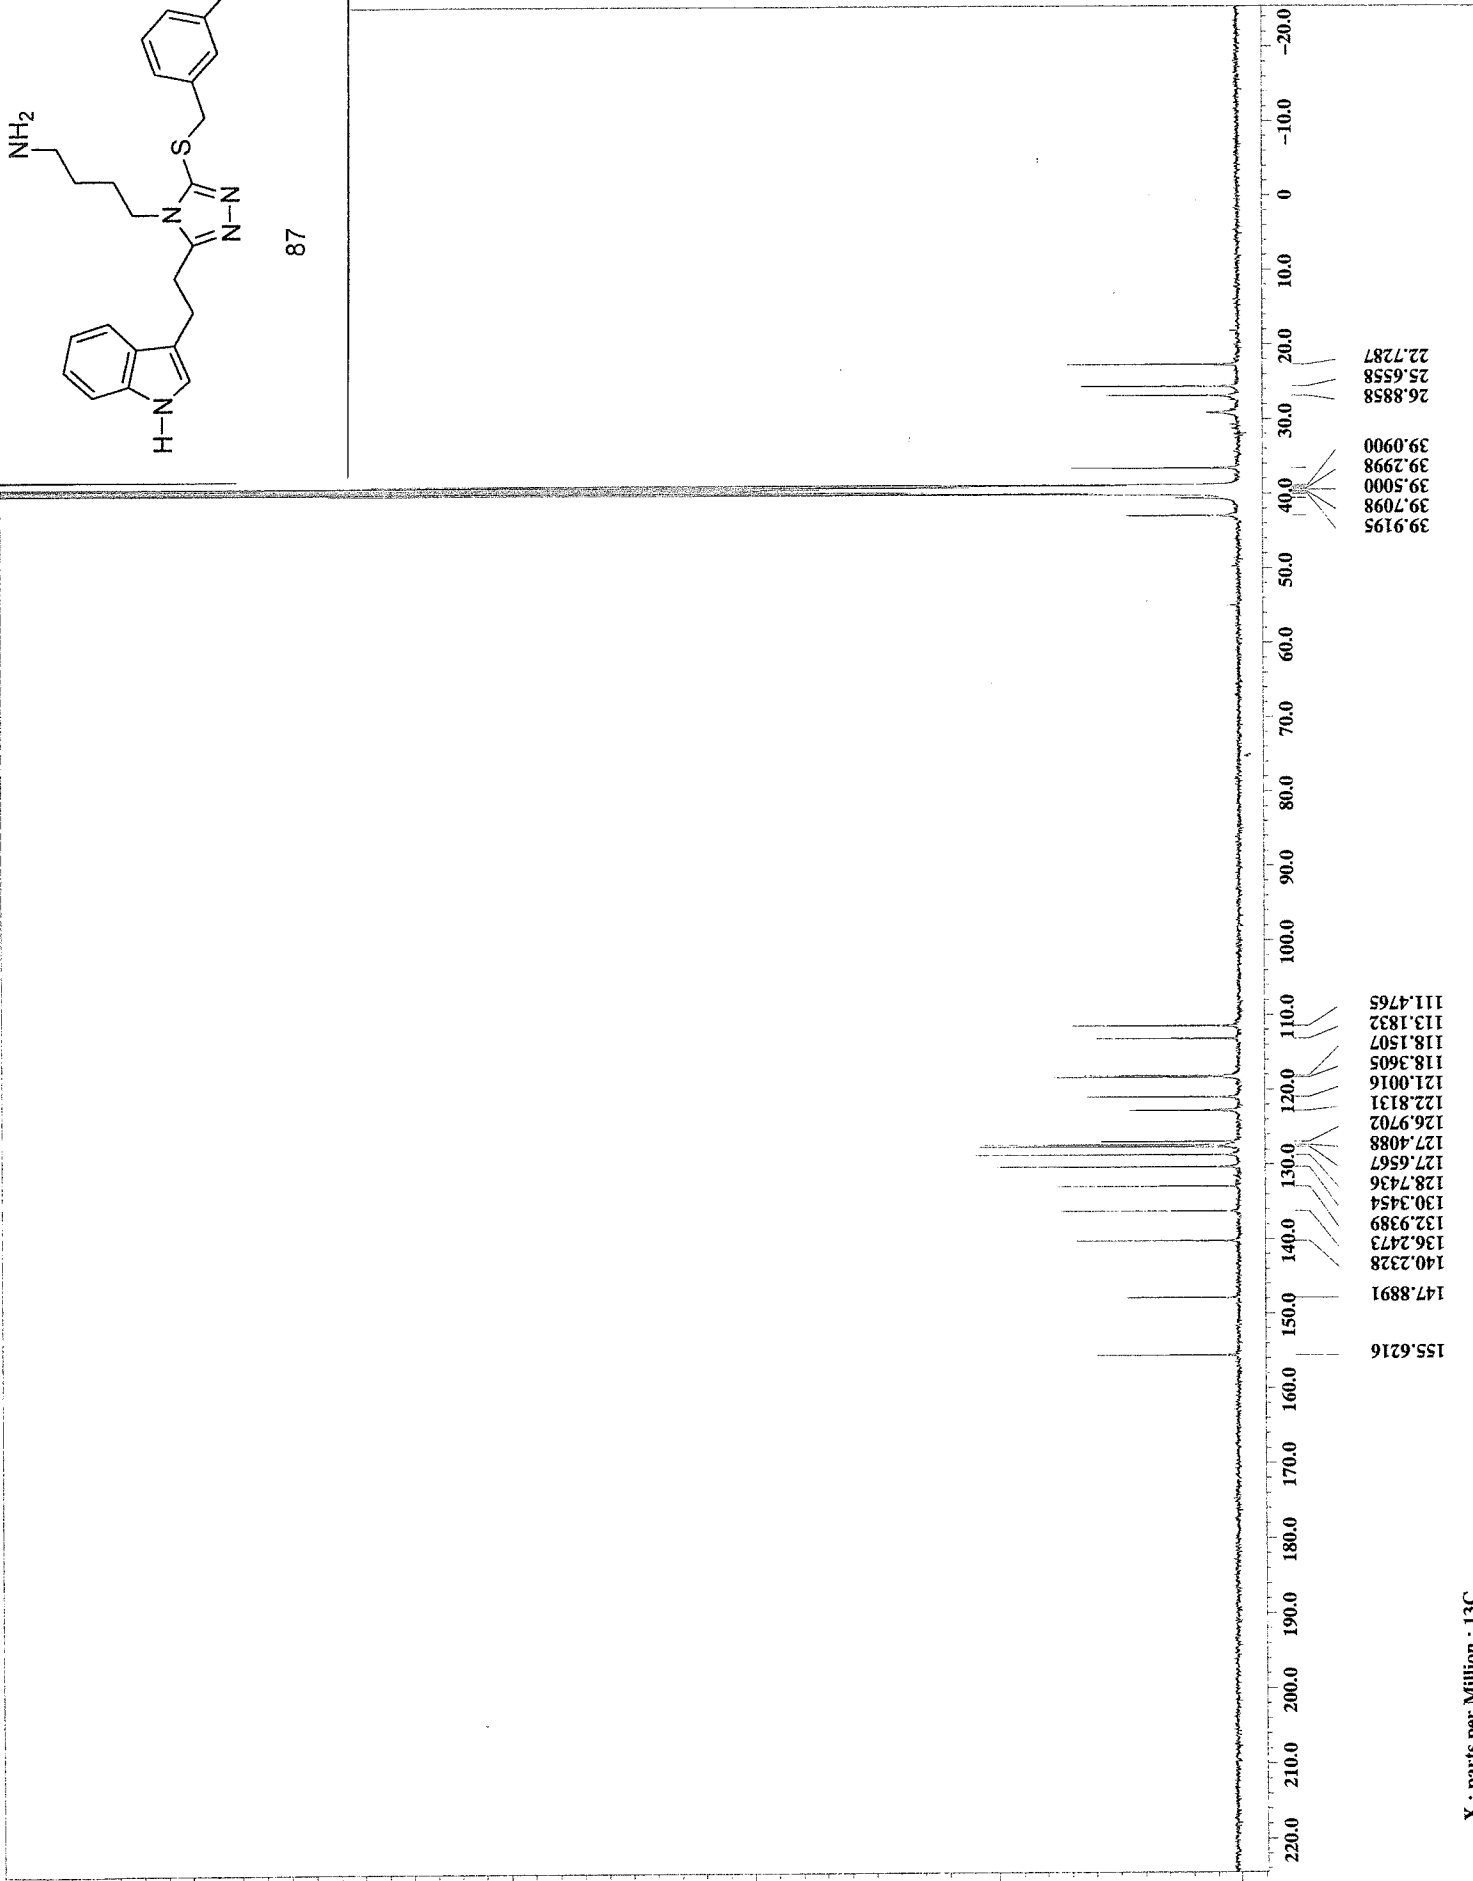

87

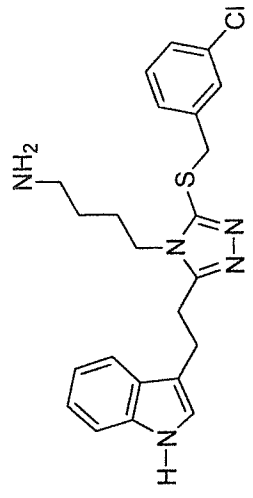

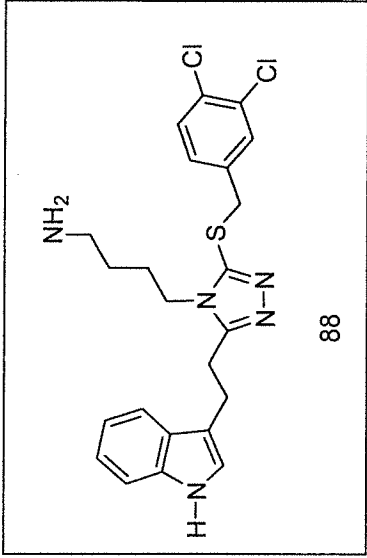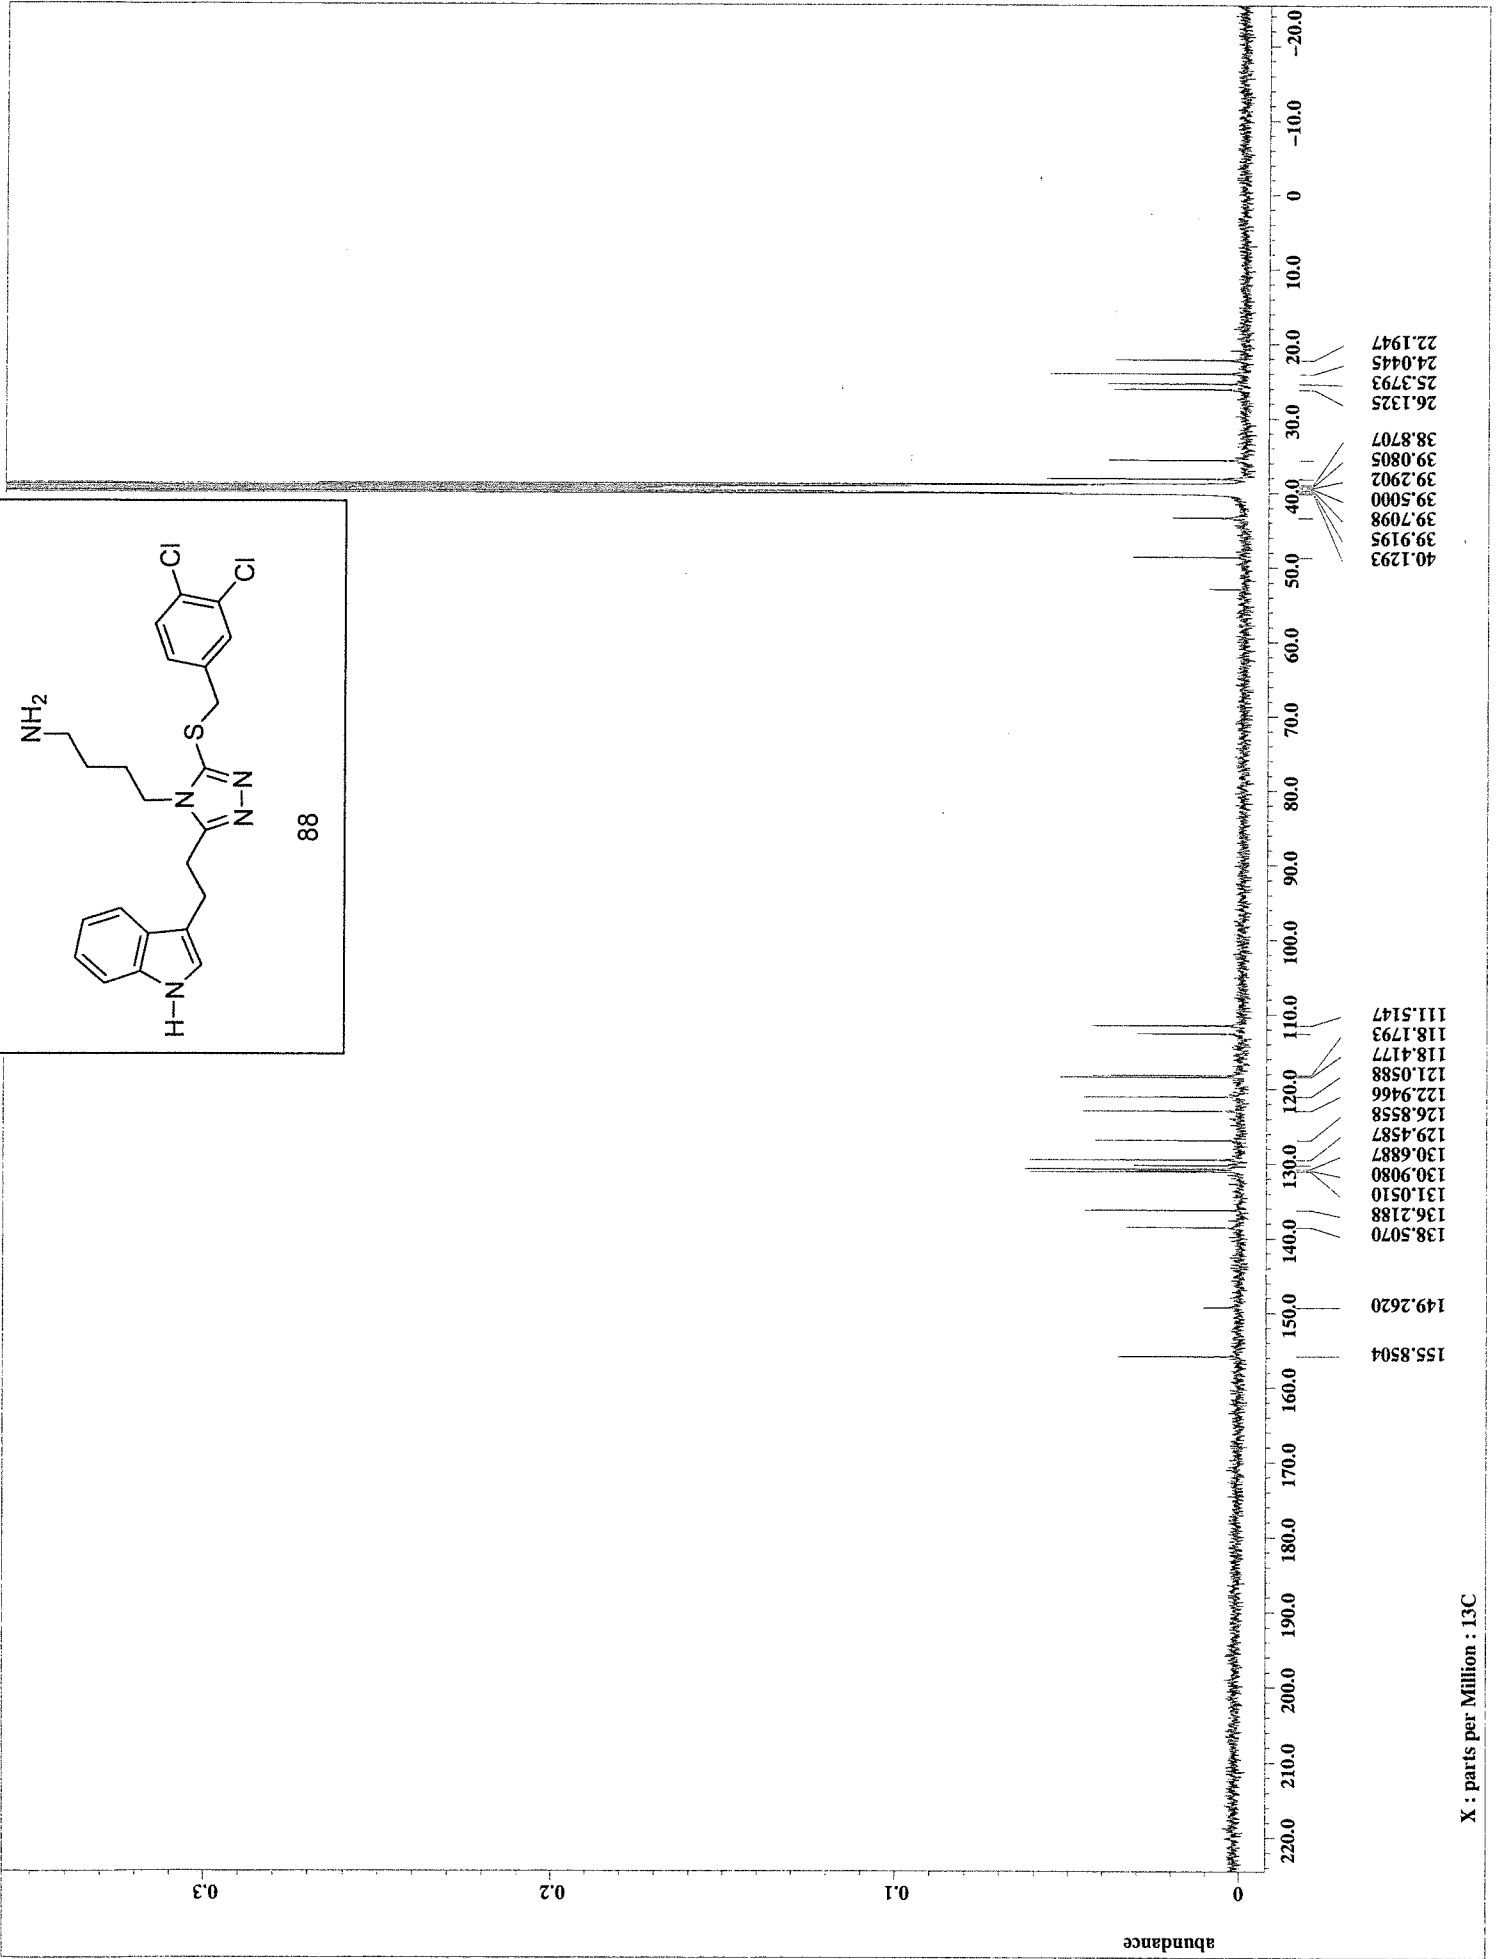

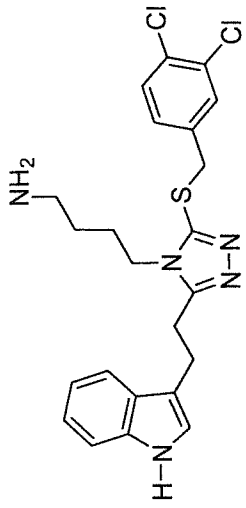

88

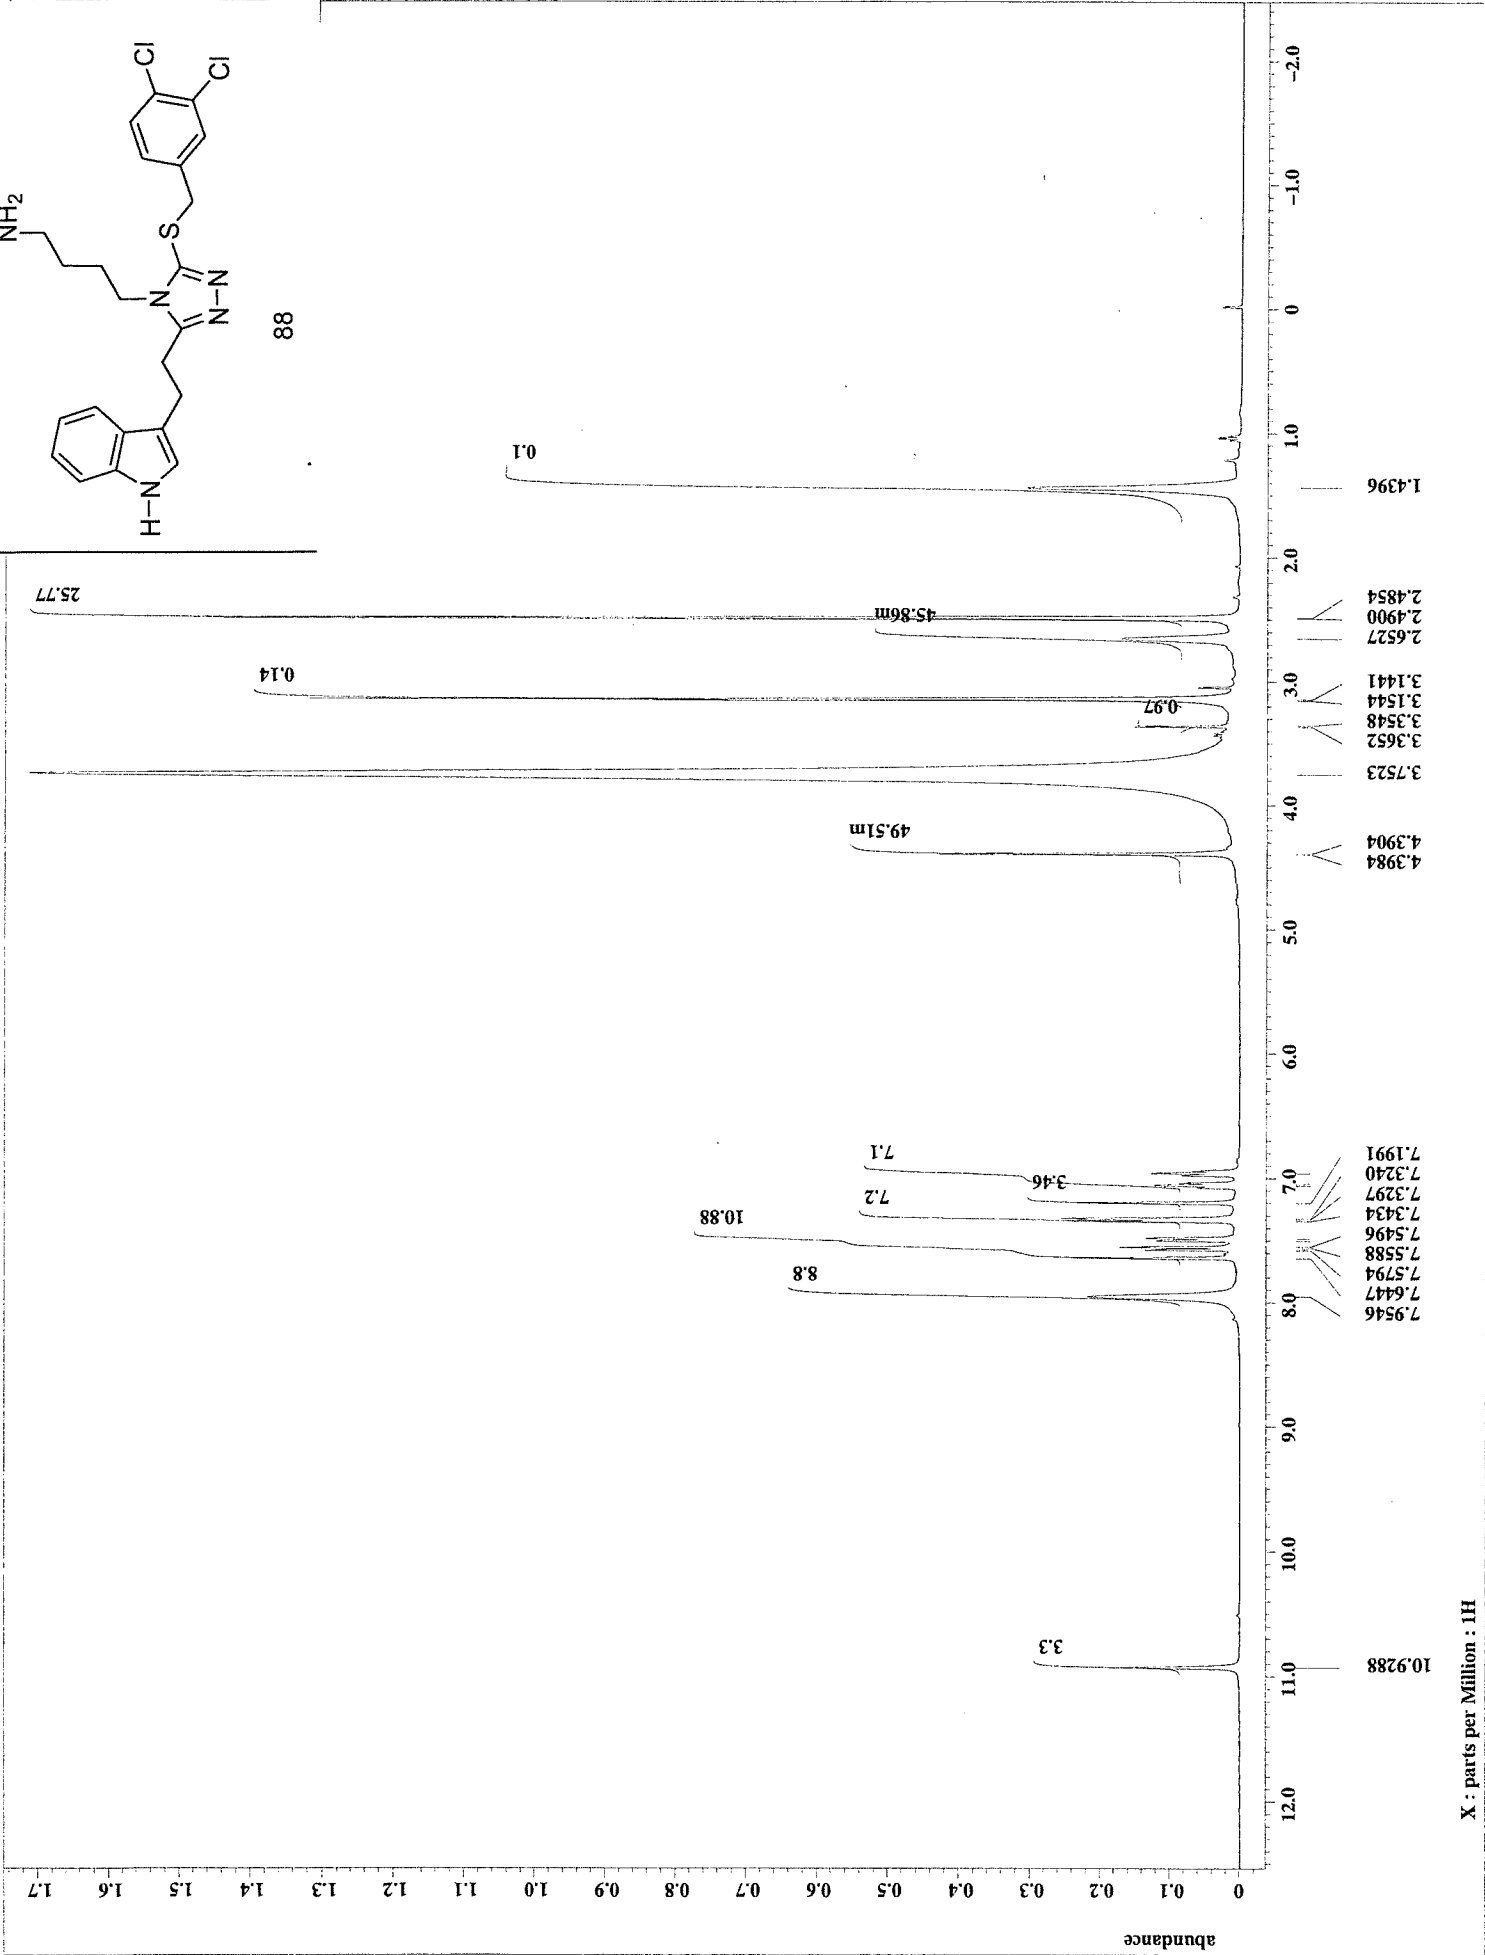

X : parts per Million : 1H



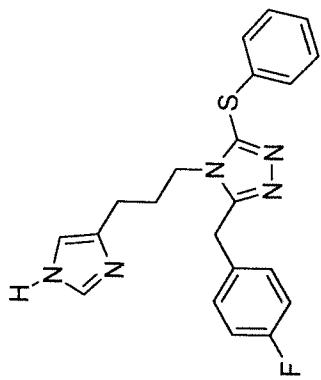

90

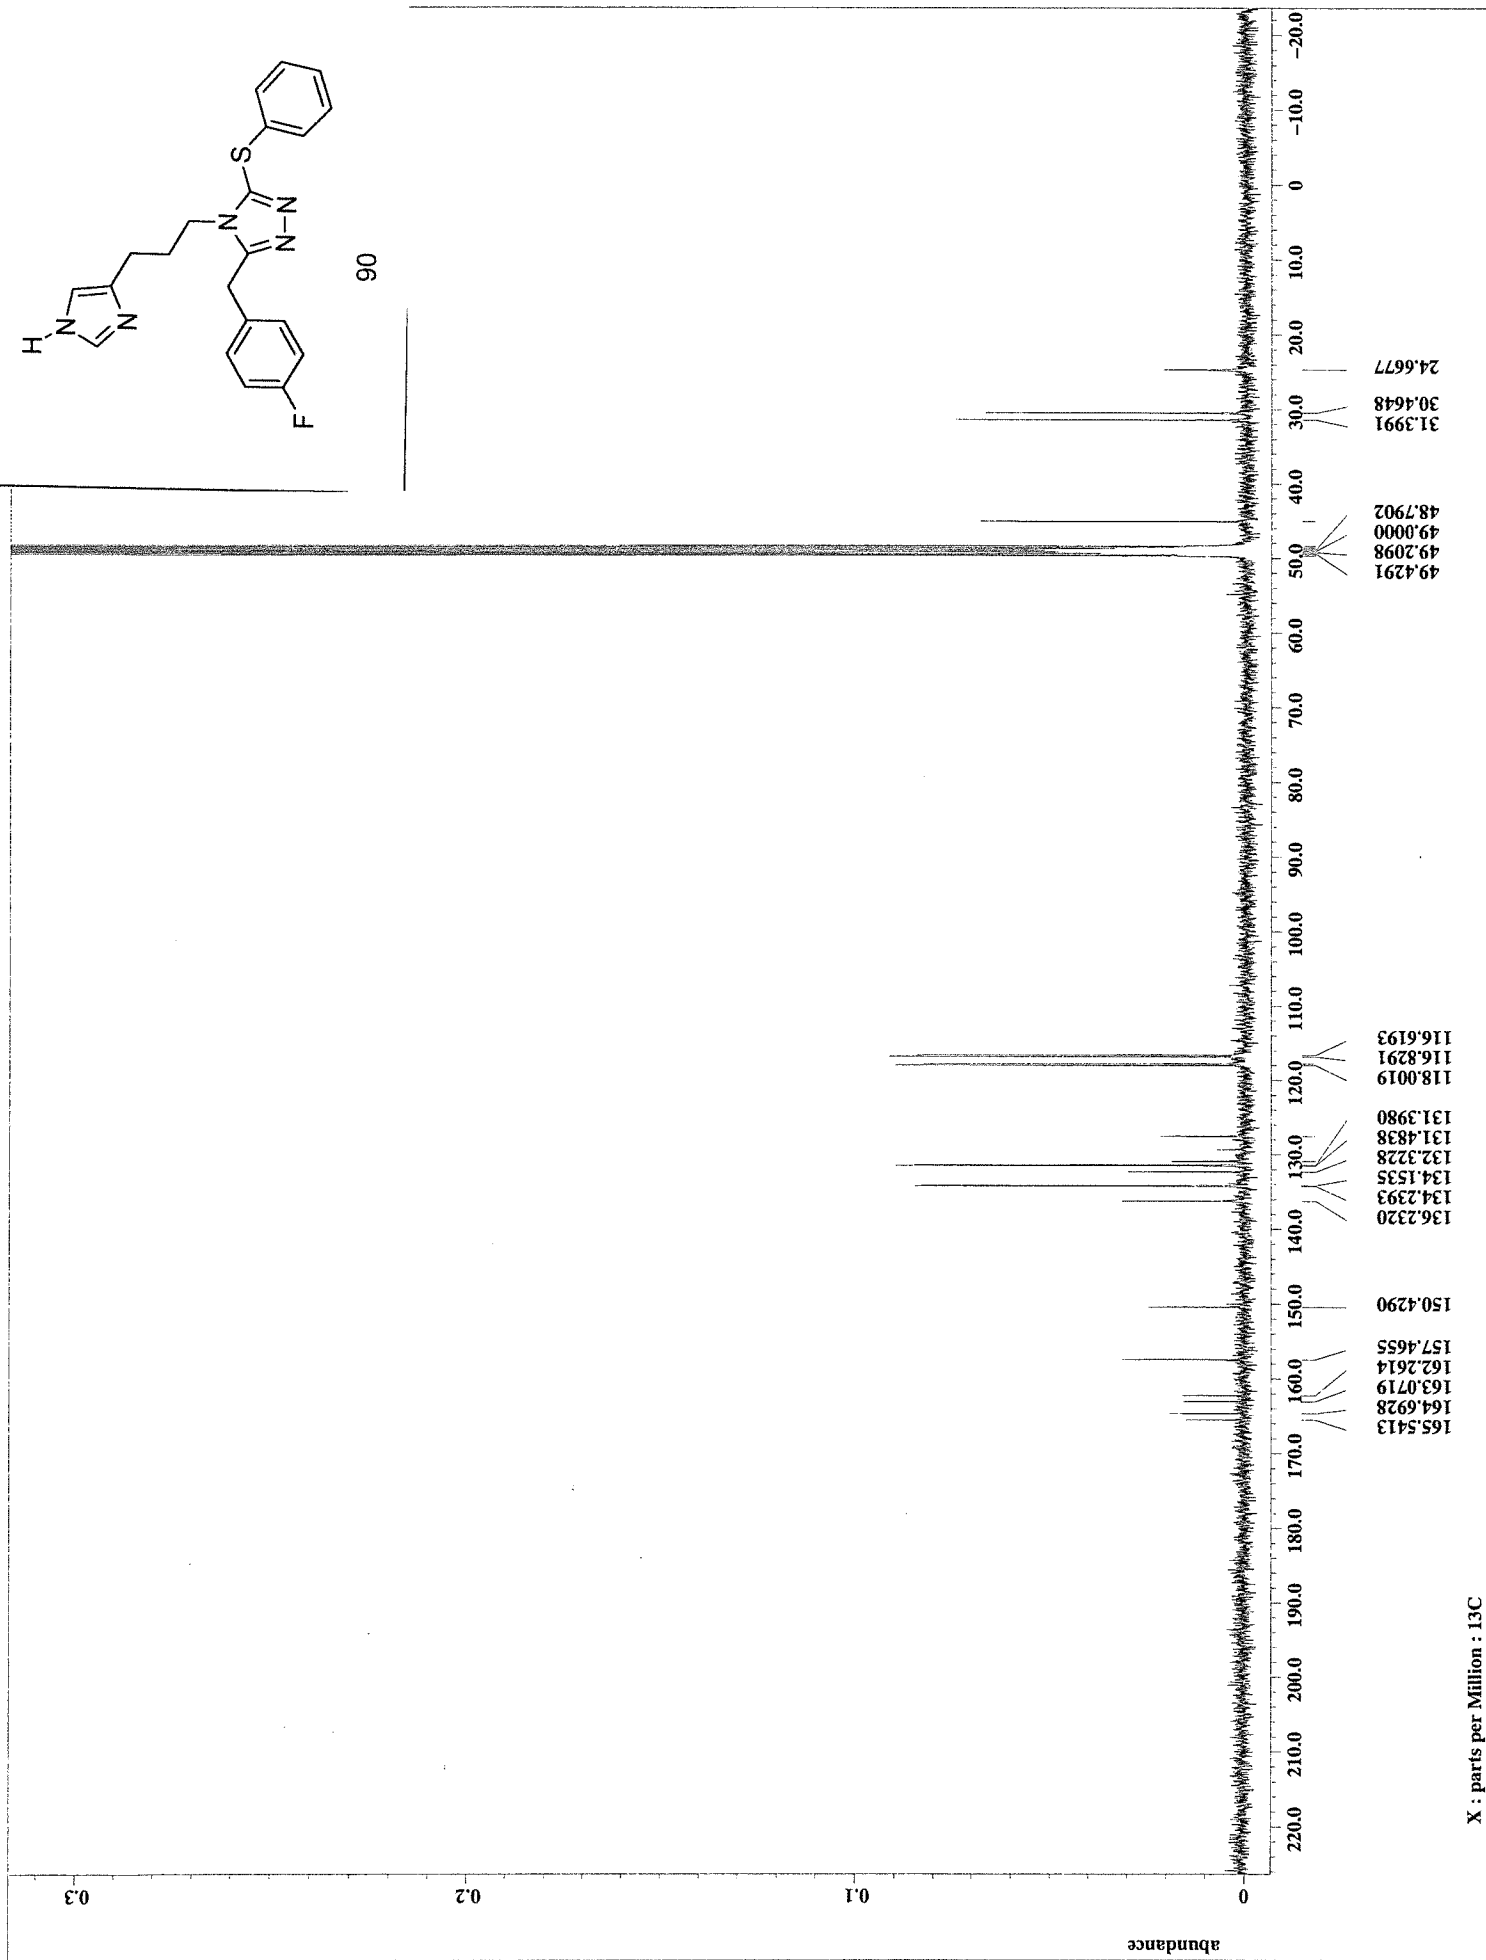

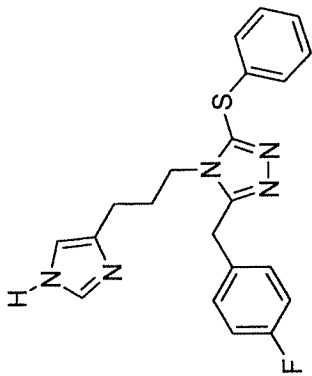

06

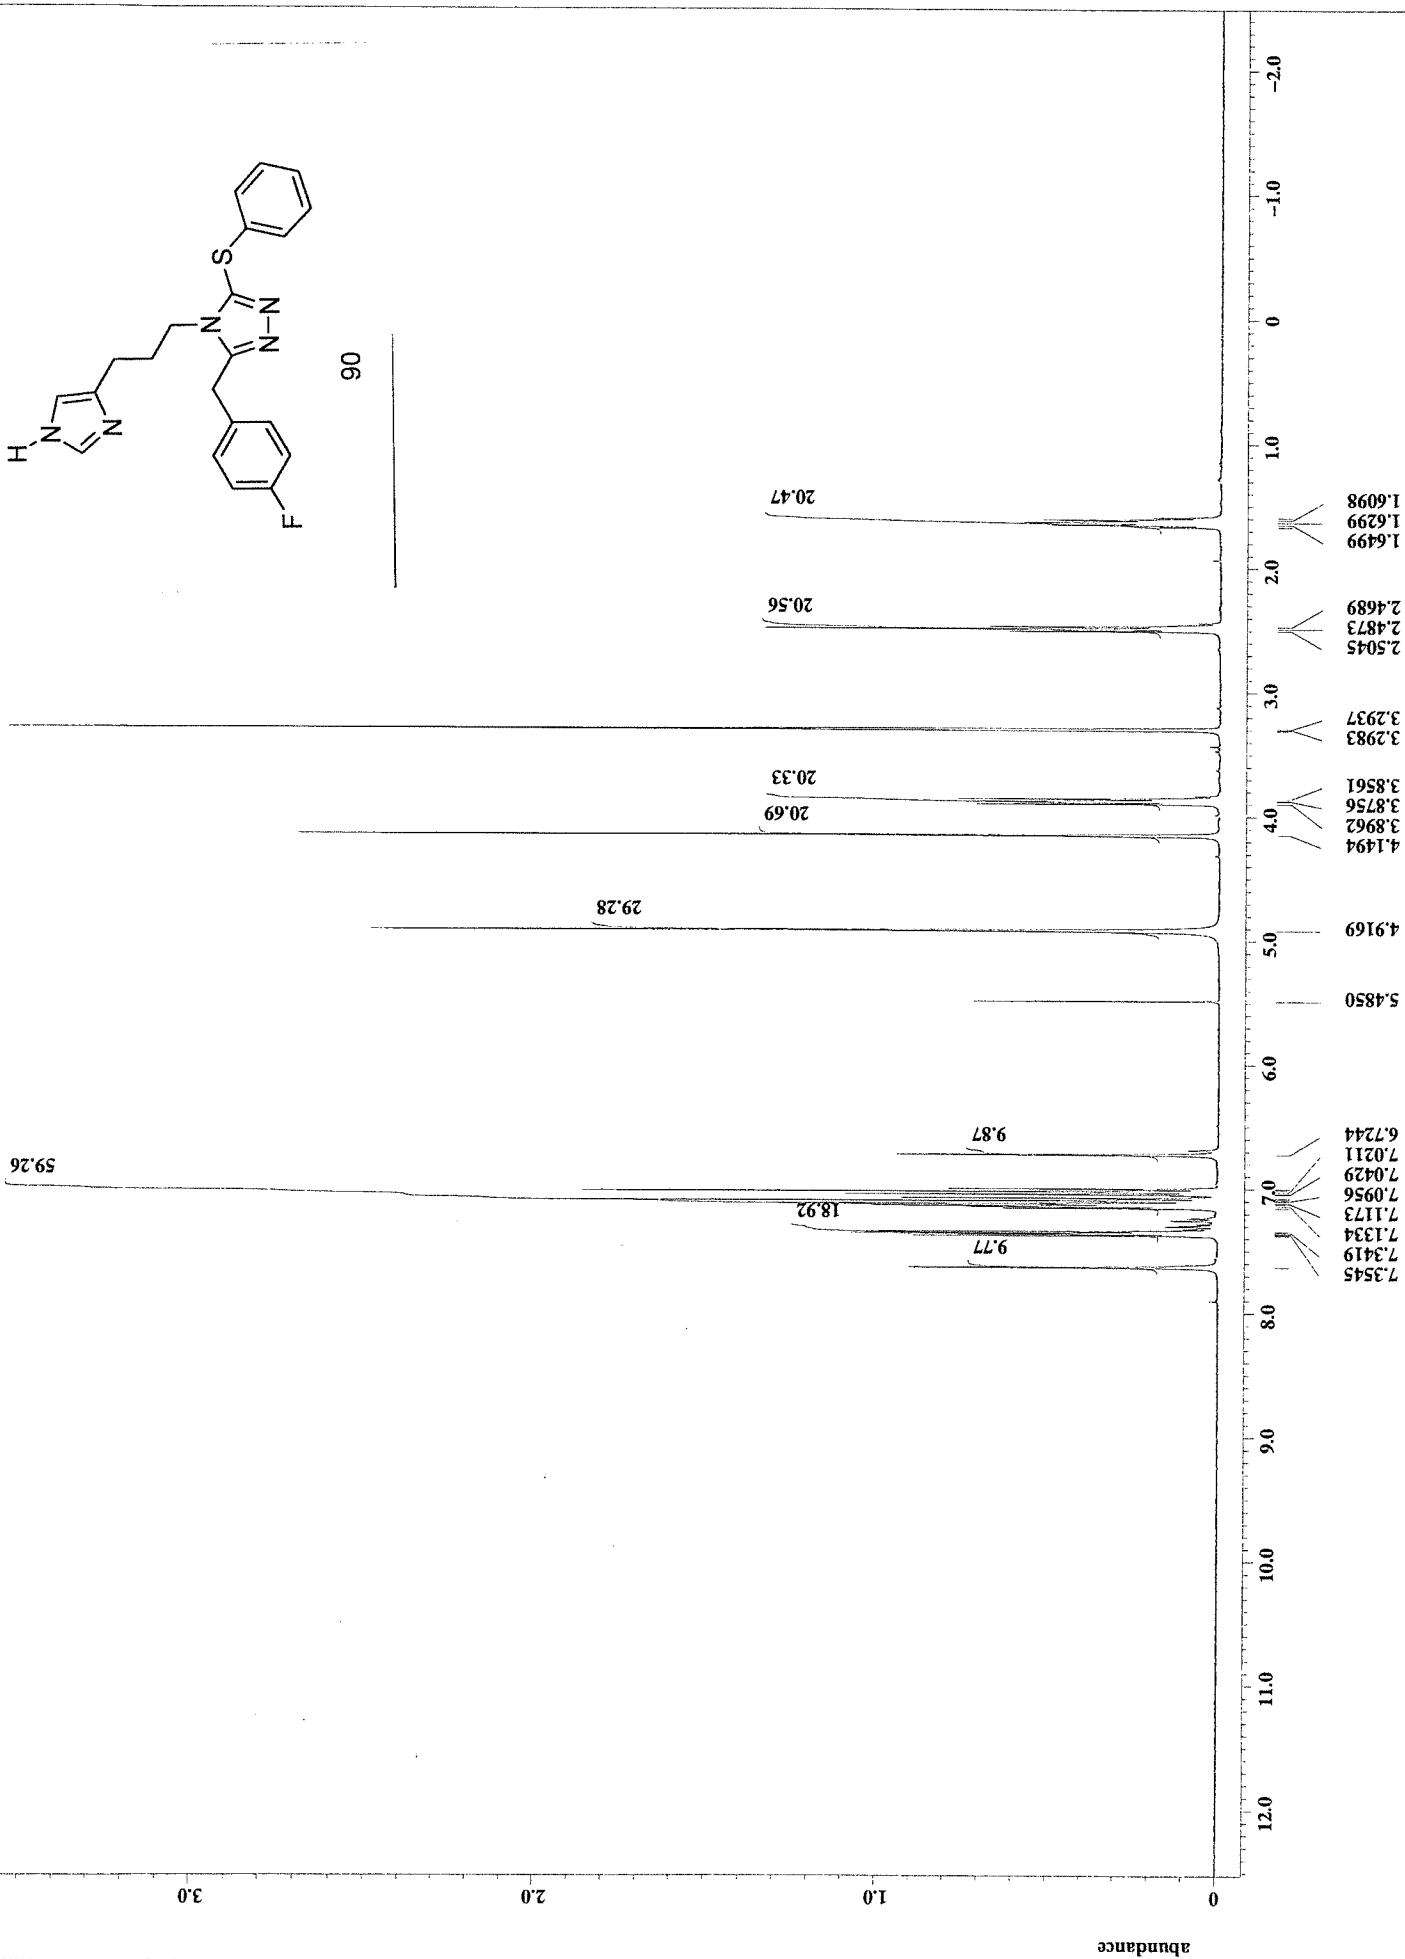

X : parts per Million : 1H

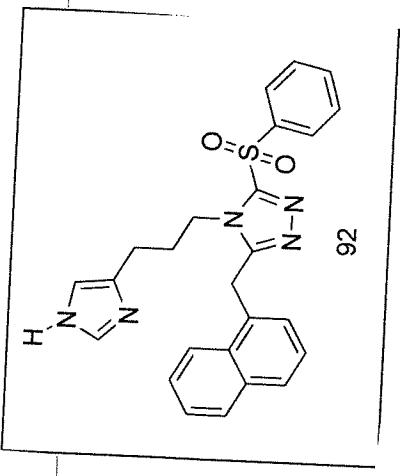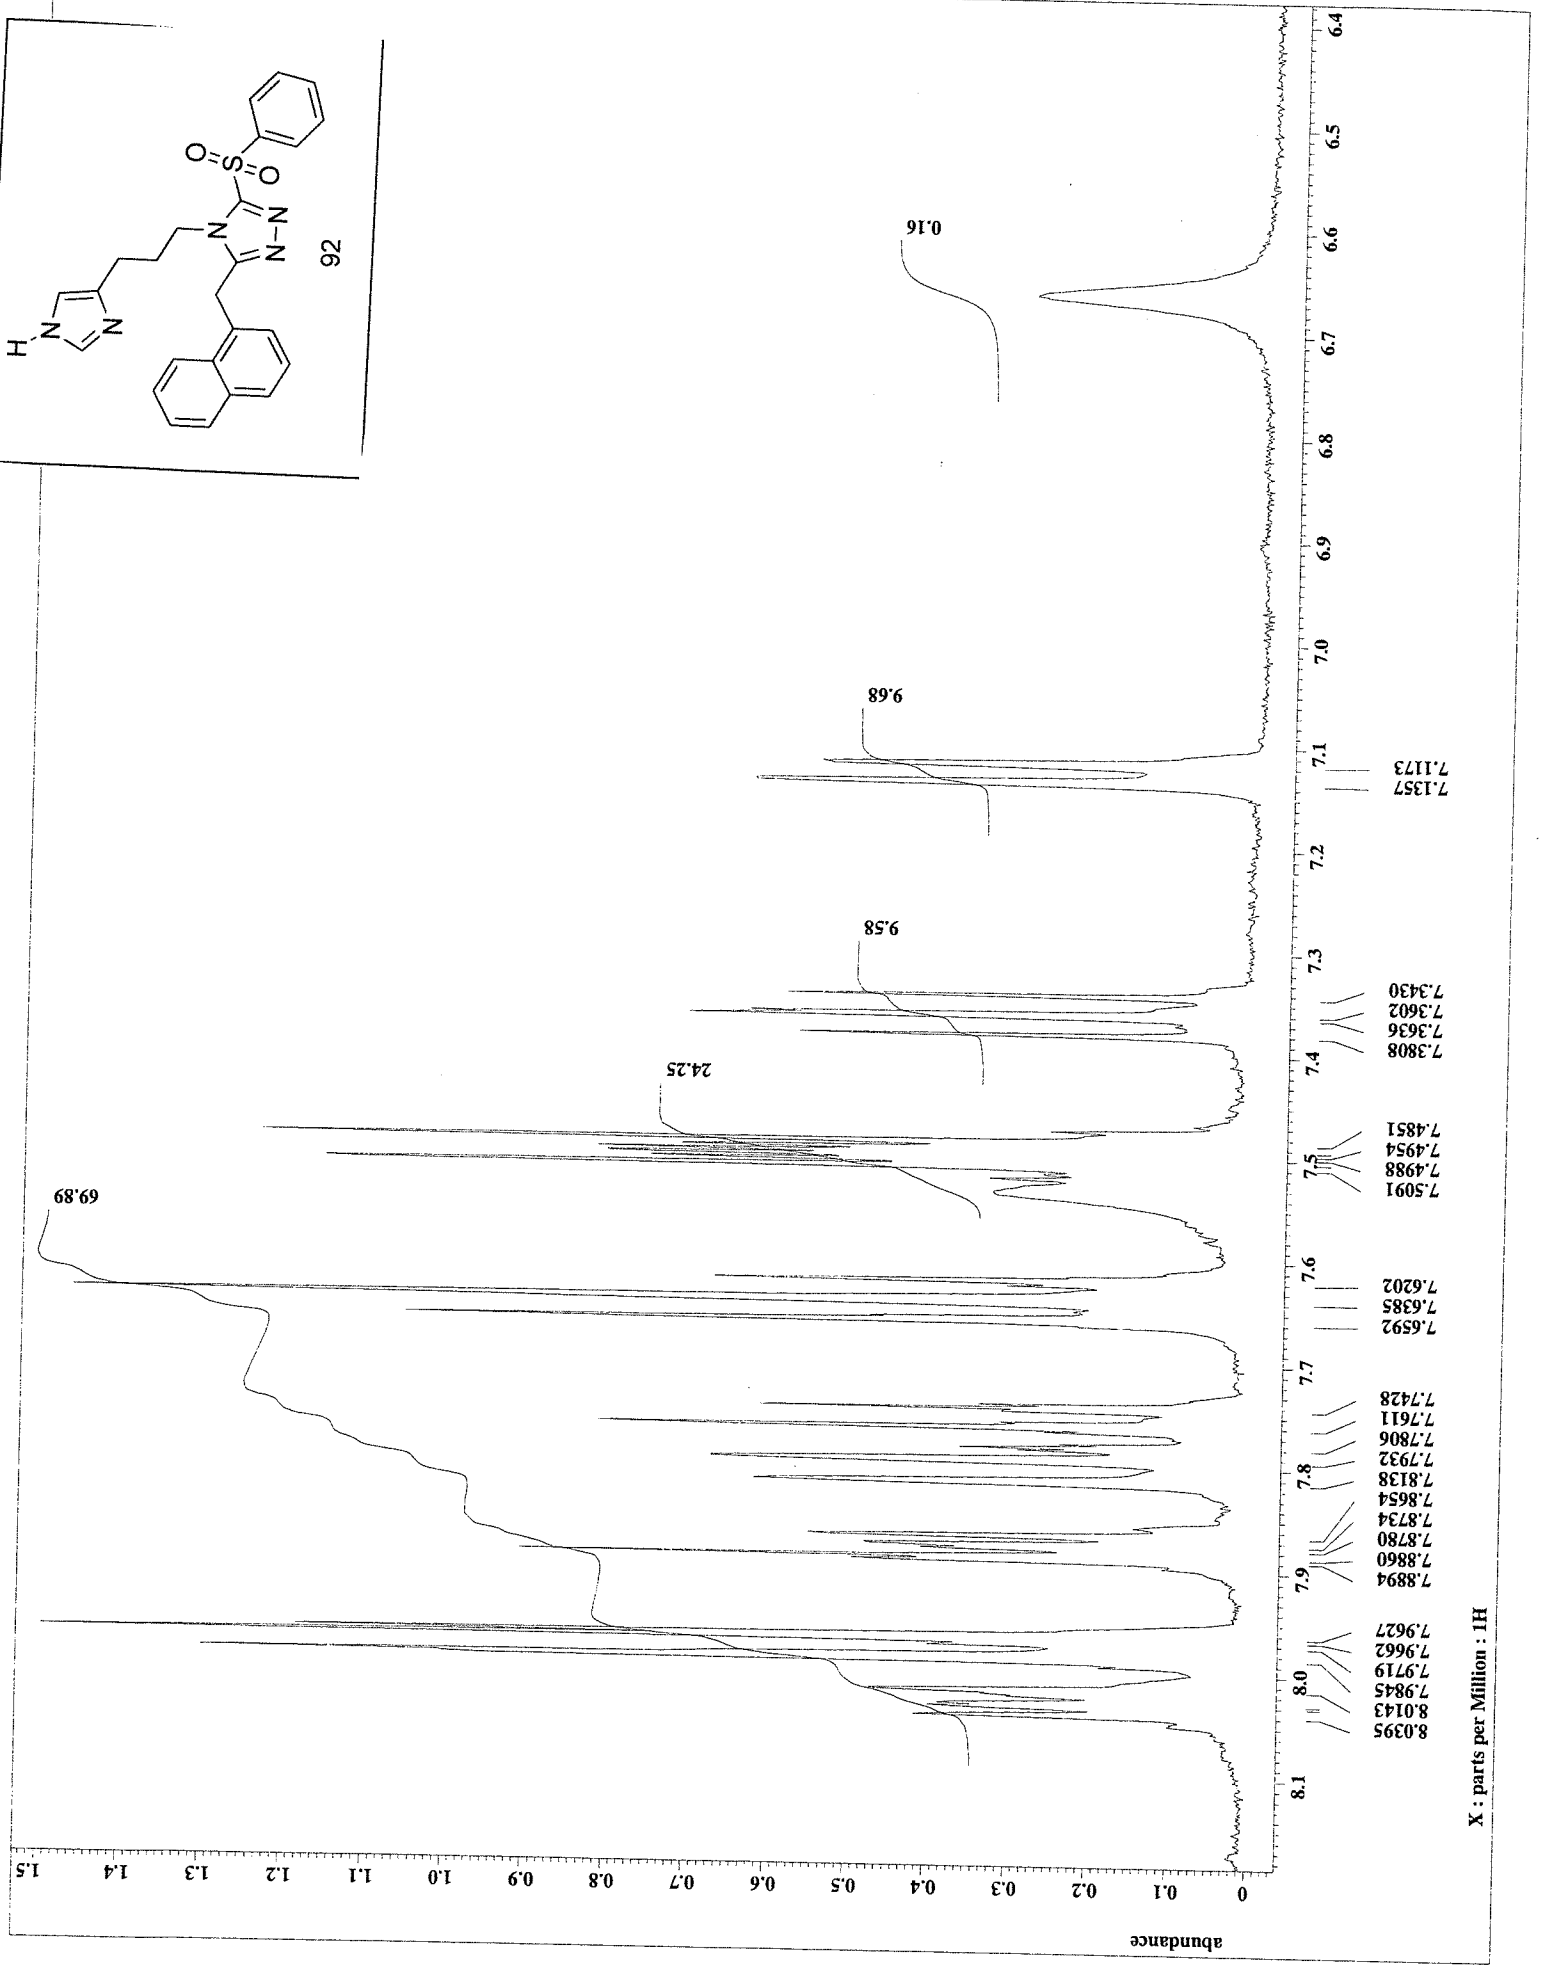

X : parts per Million : 1H

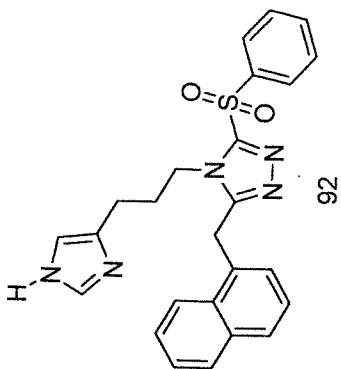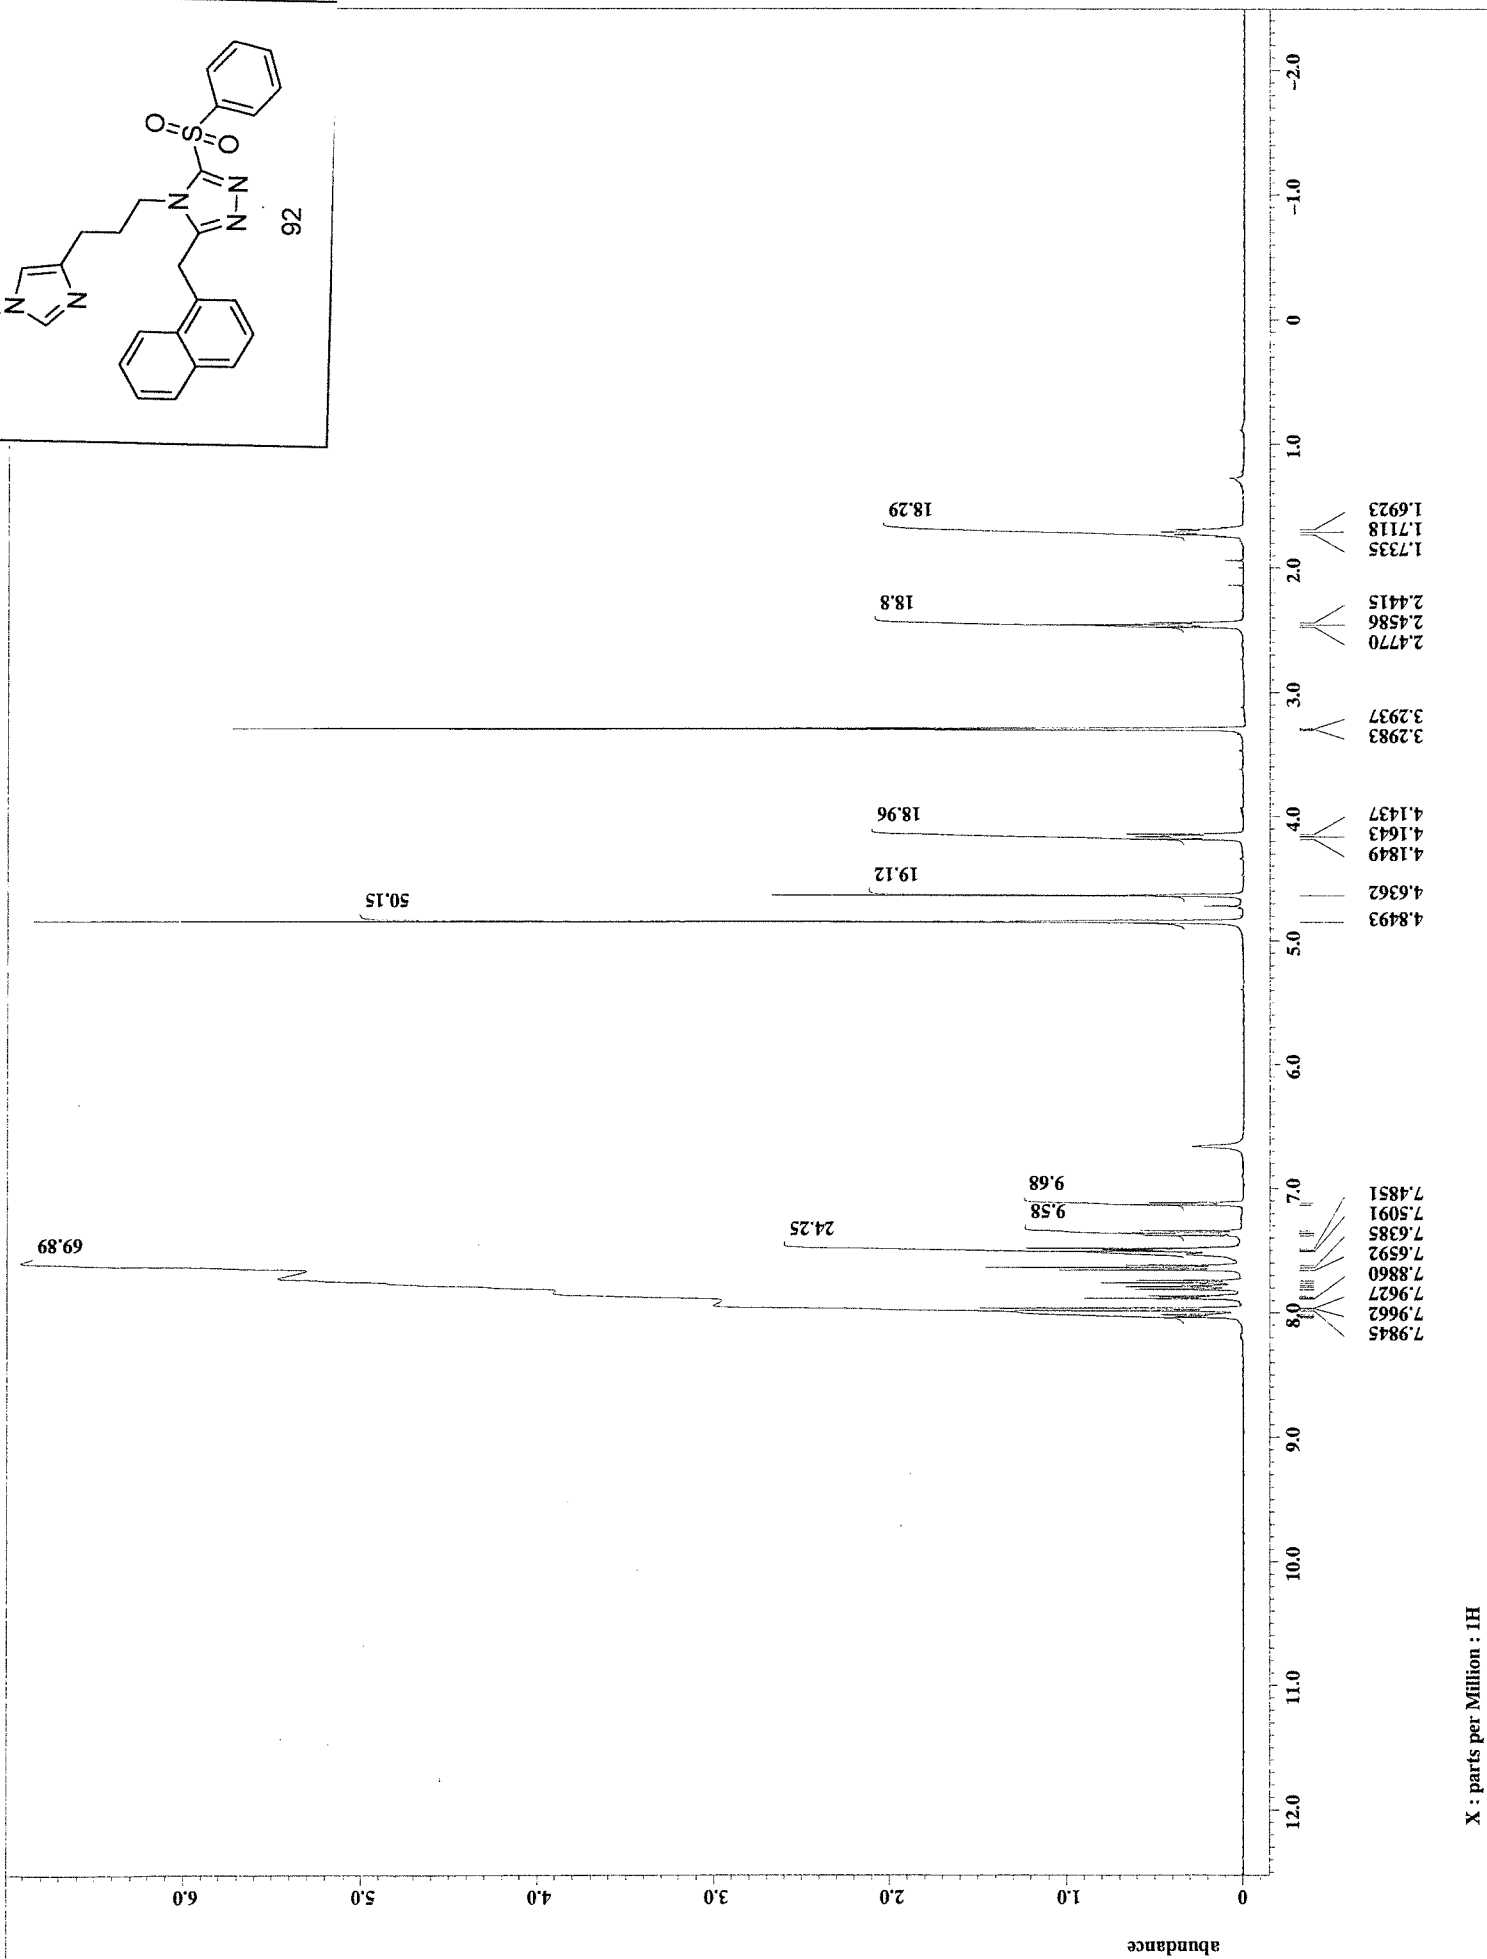

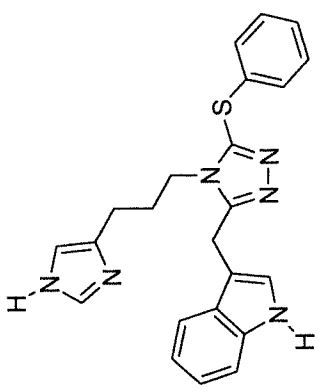

93

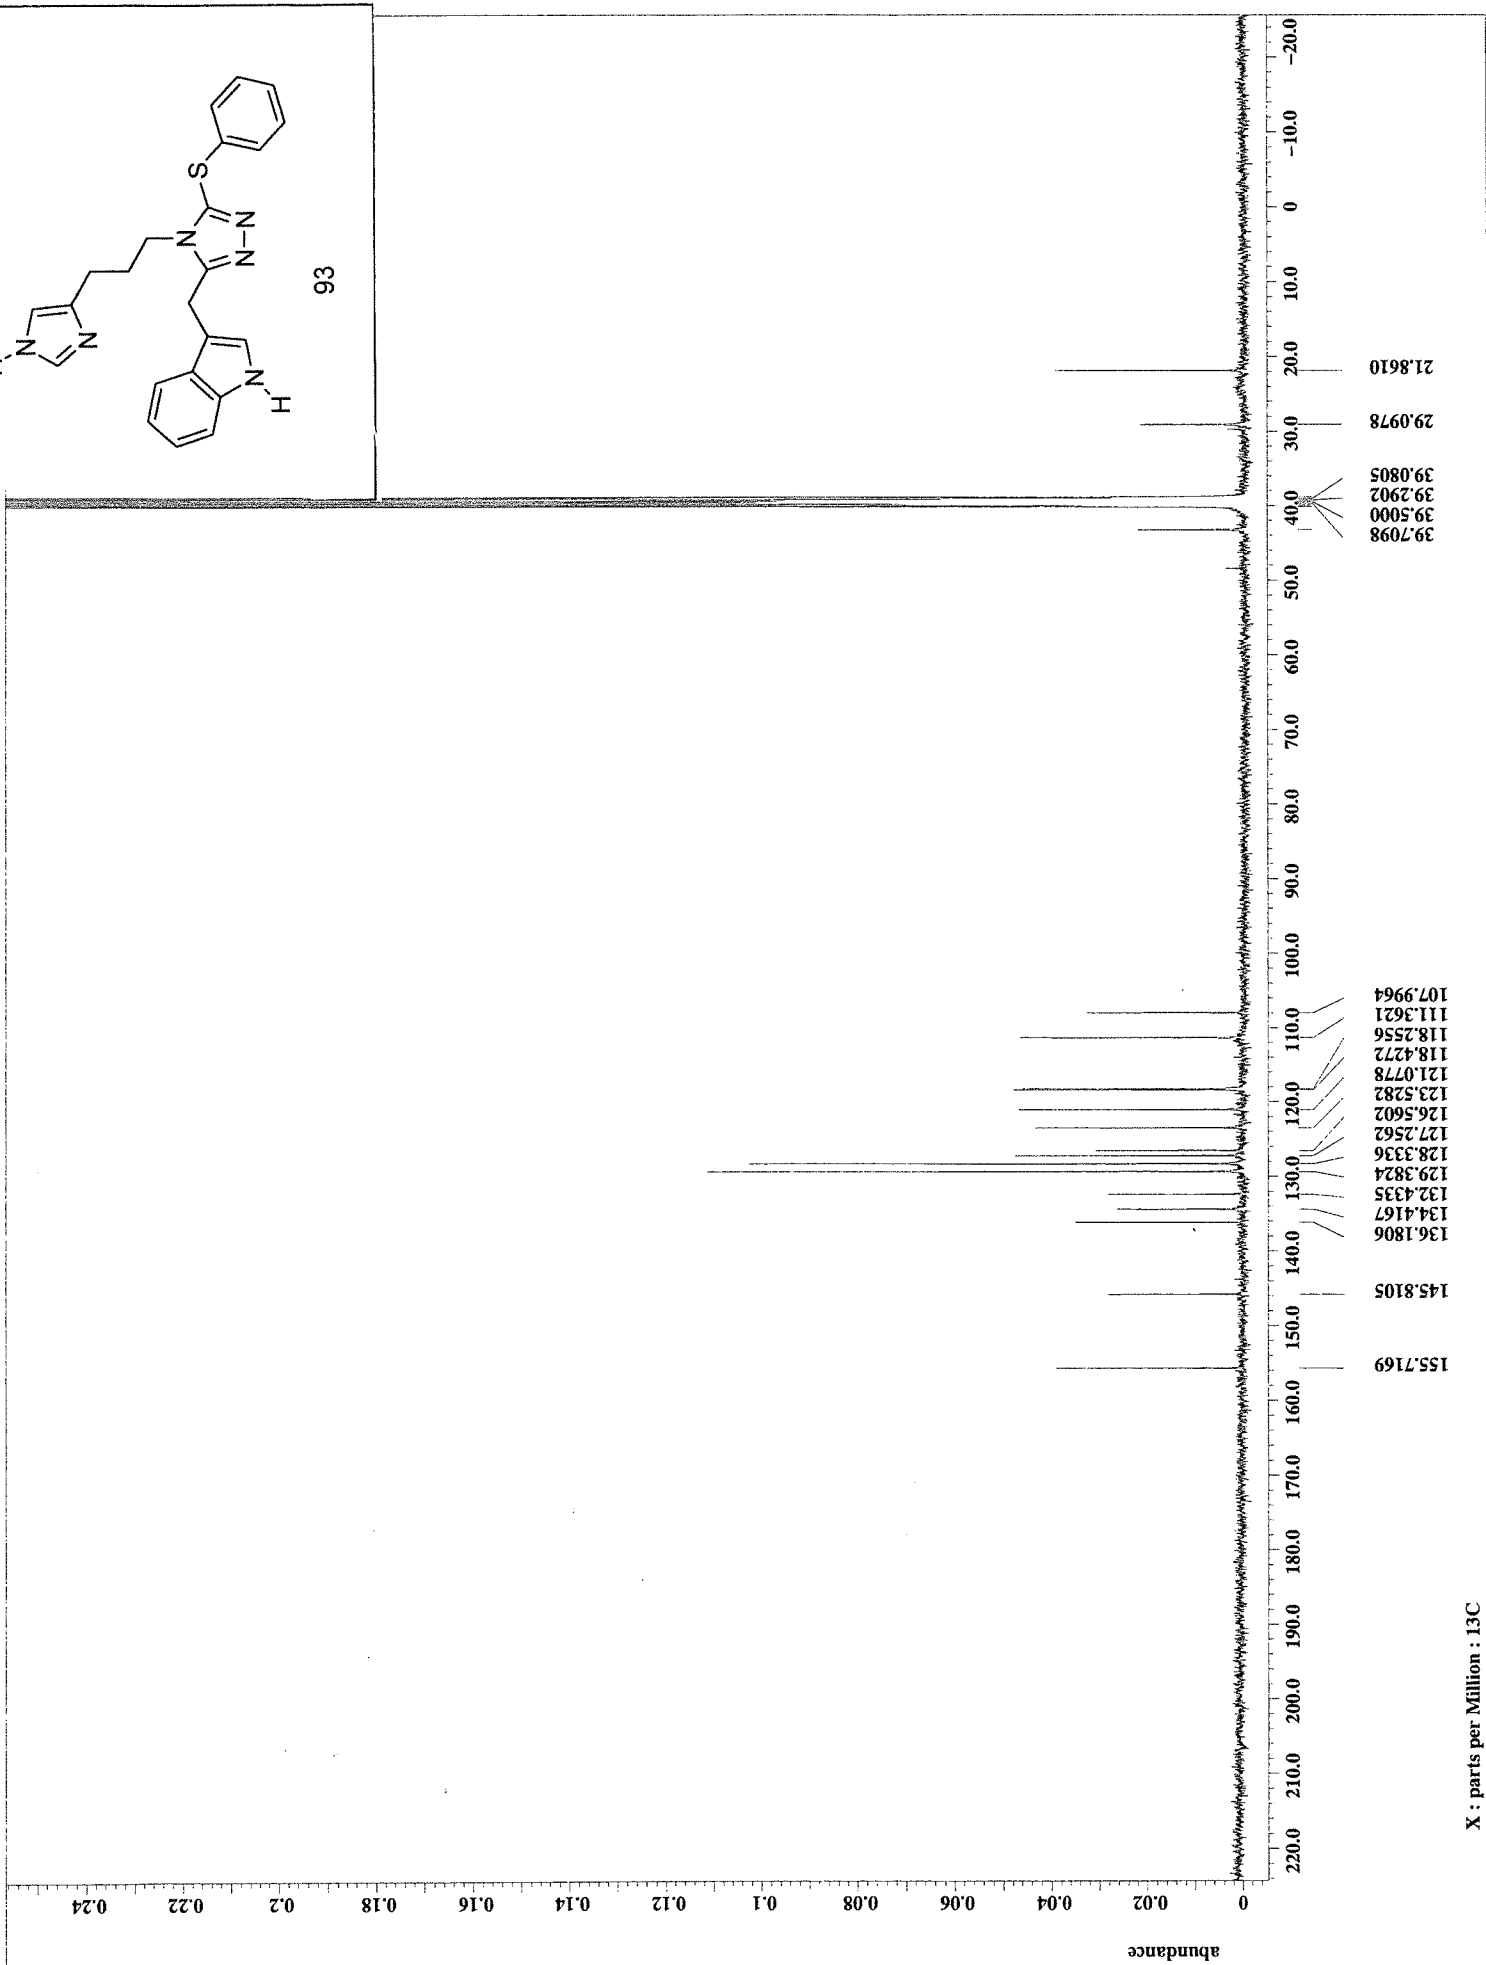

X : parts per Million : 13C

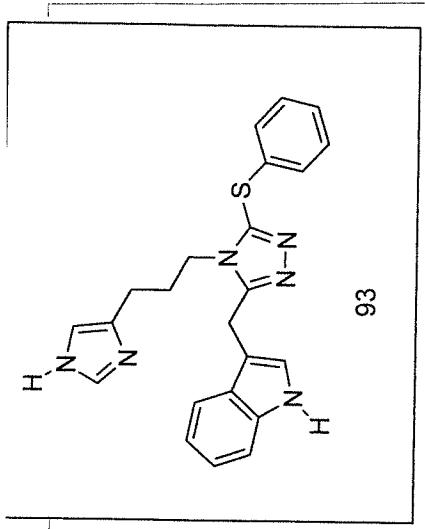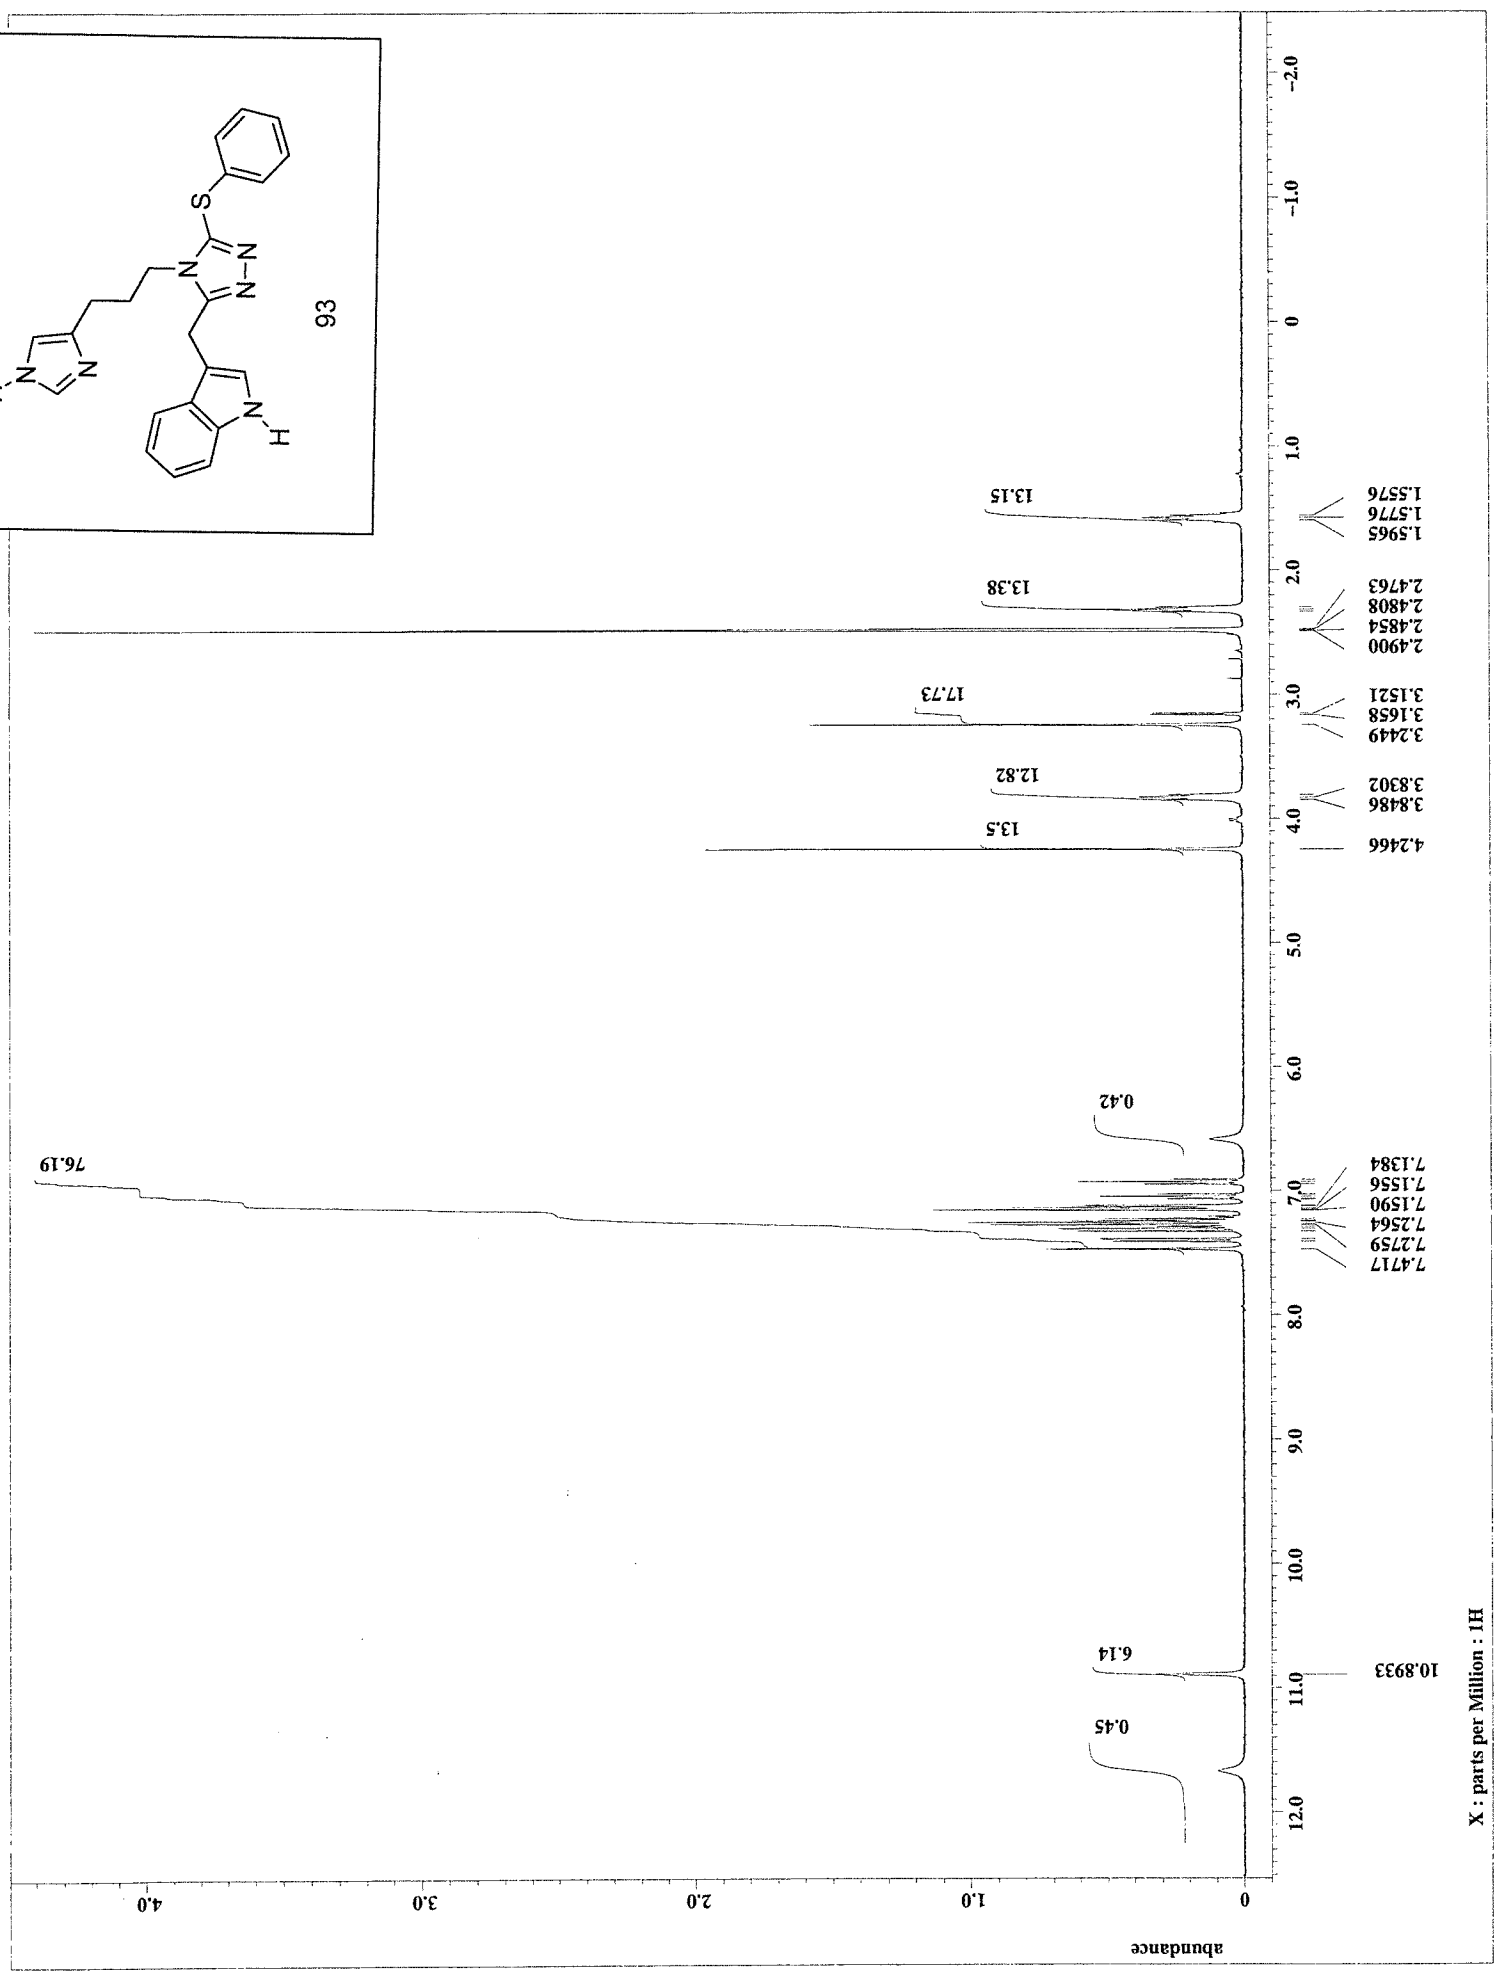

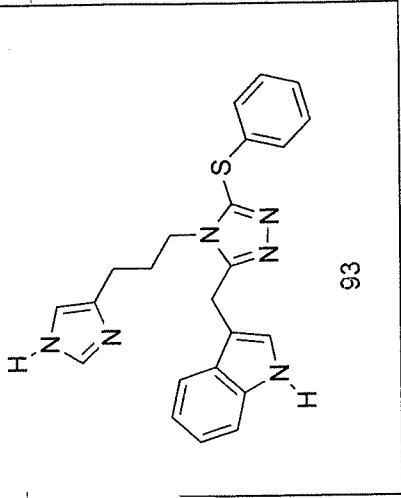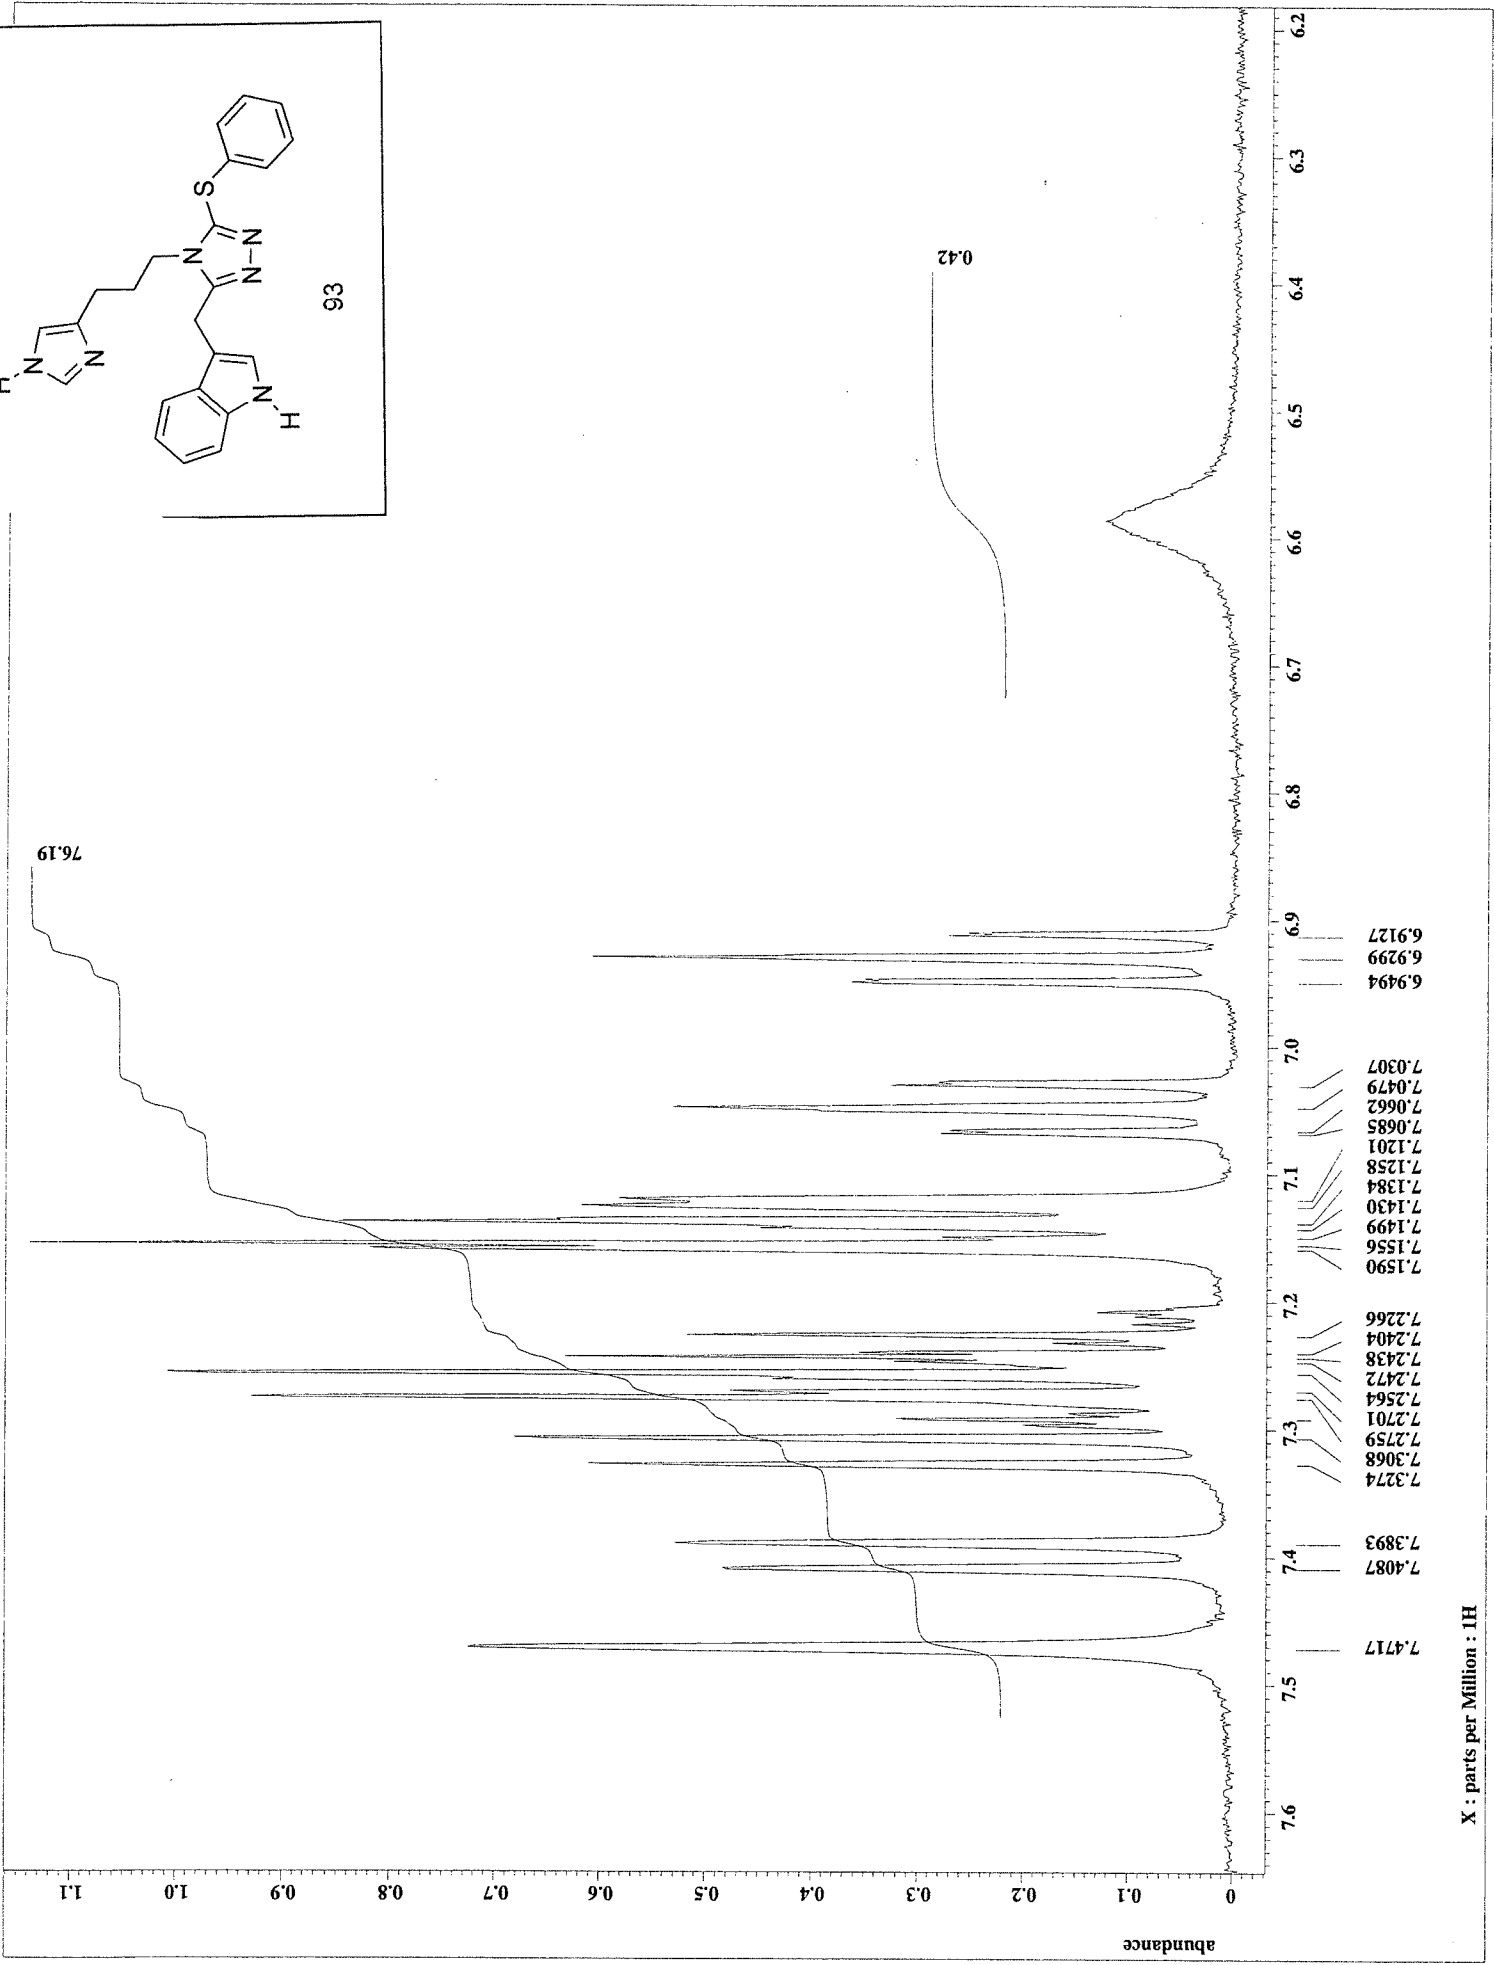

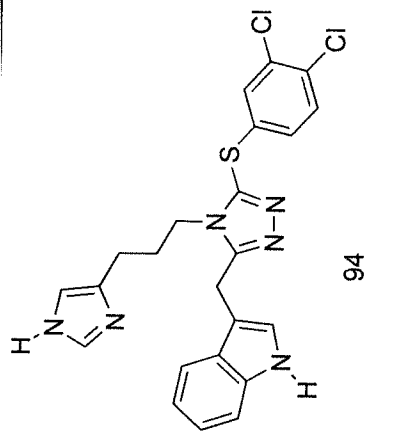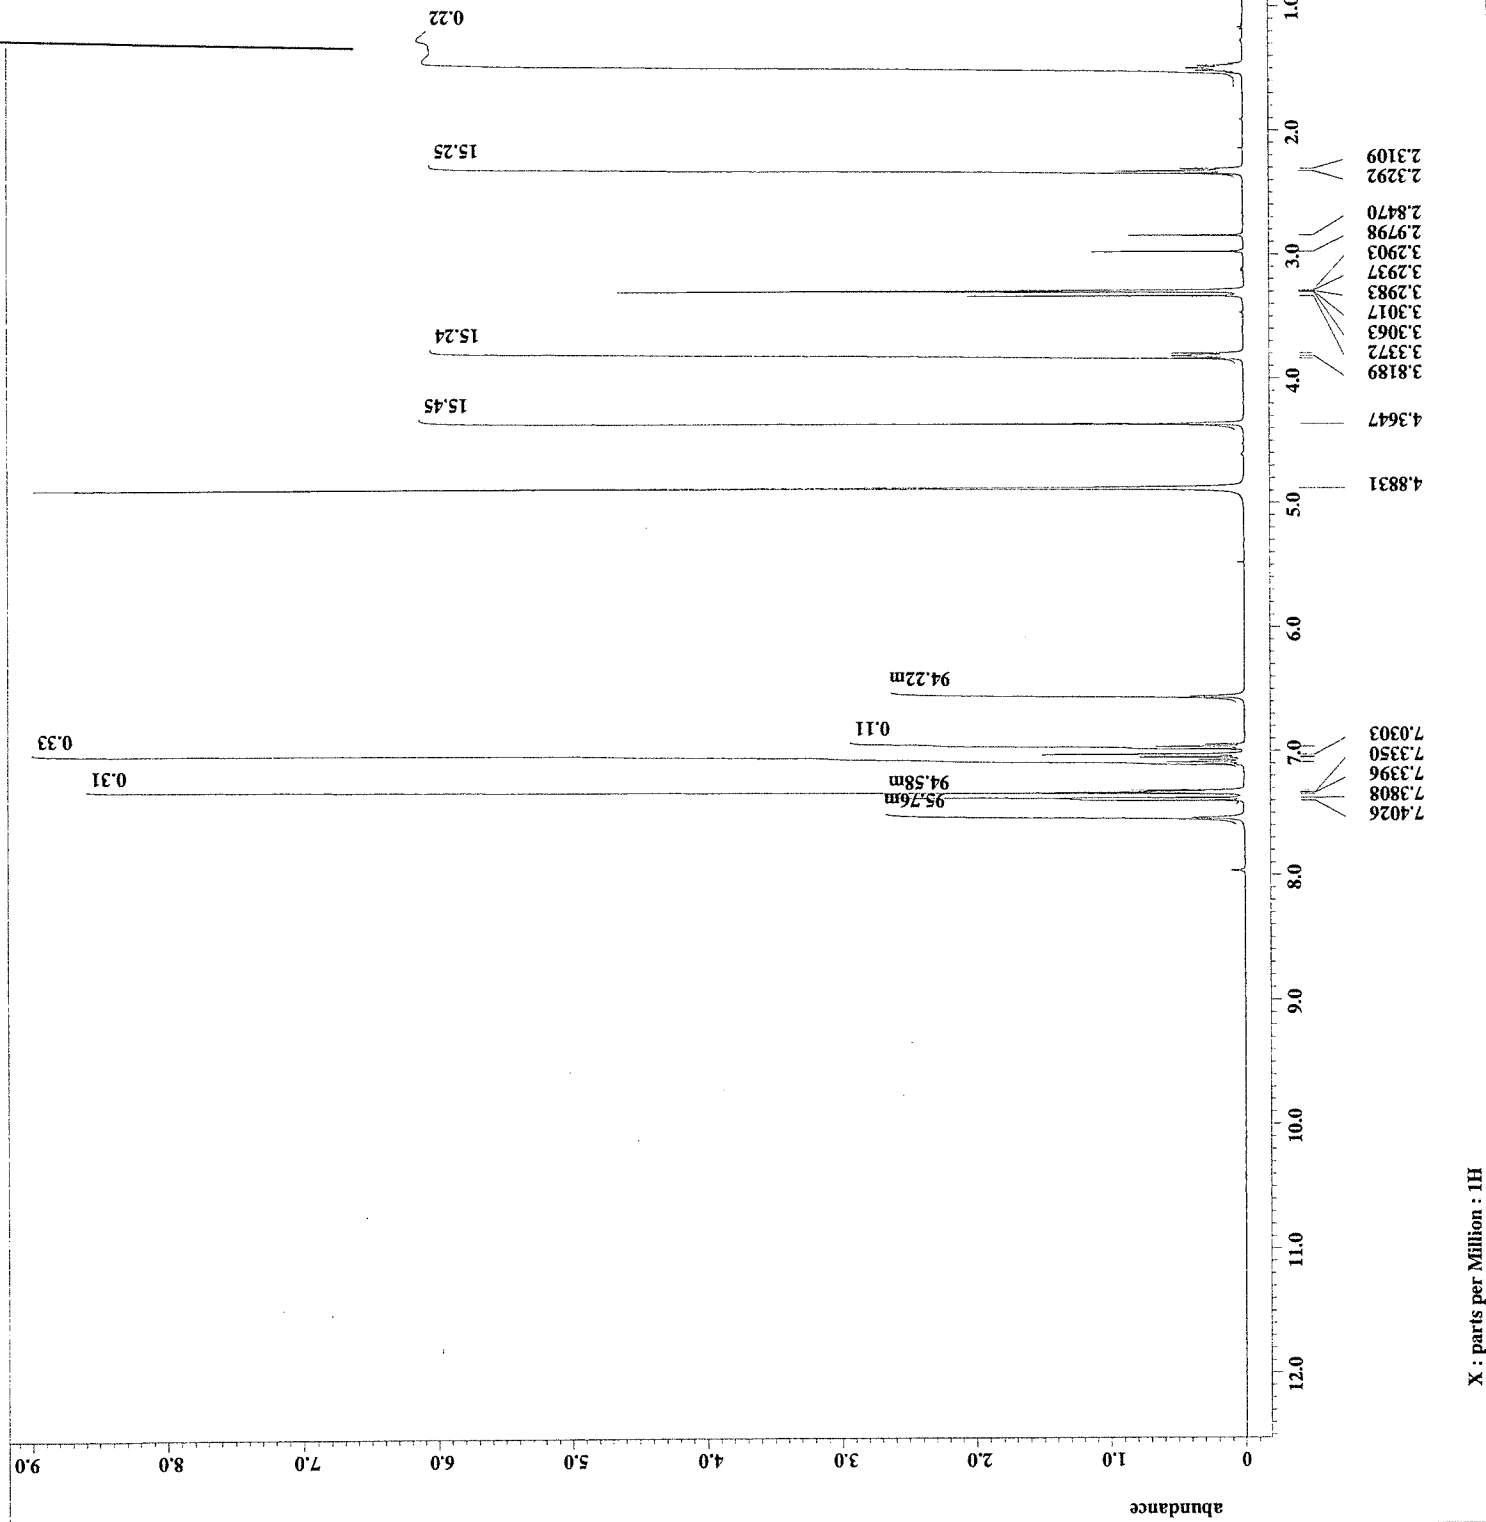

X : parts per Million : 1H



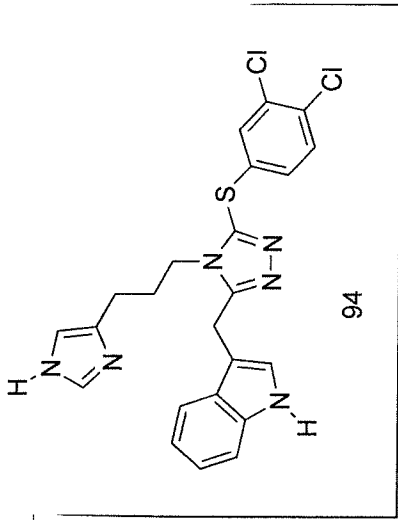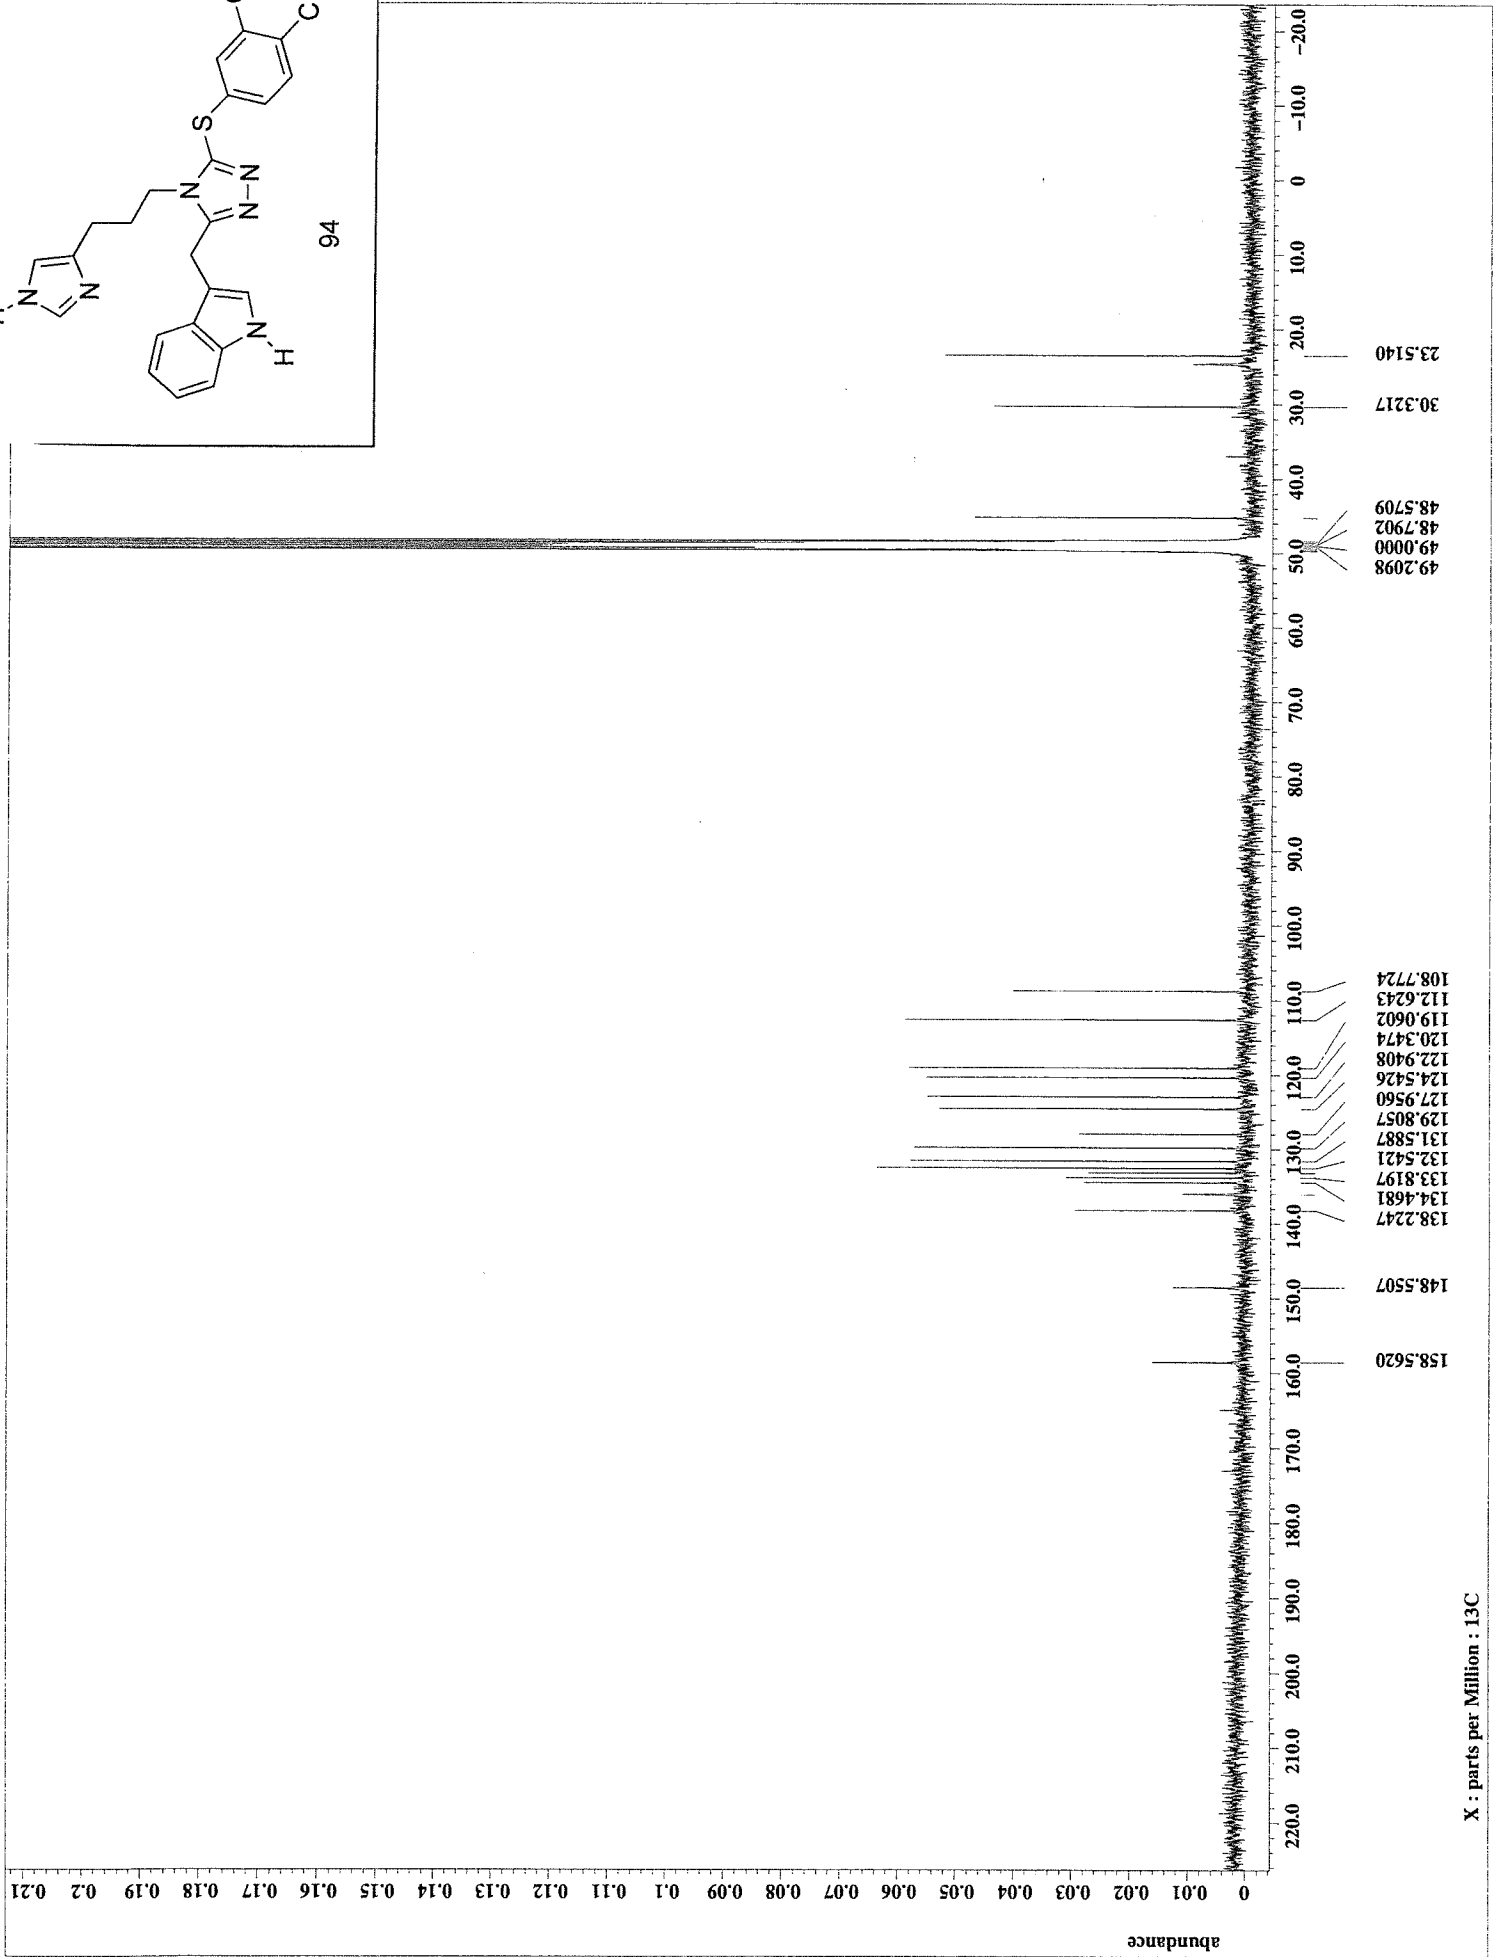

X : parts per Million : 13C

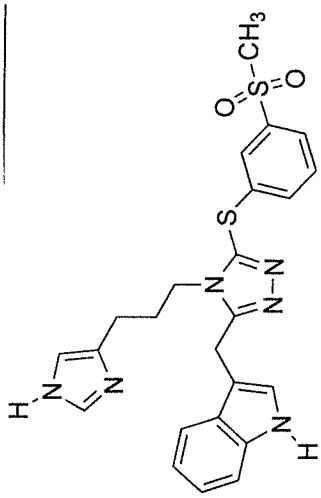

95

0.3

0.2

0.1

0

abundance

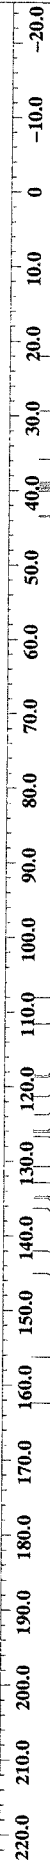

- 21.9850
- 29.2980
- 38.8803
- 39.0900
- 39.2902
- 39.5000
- 39.7098
- 39.9195
- 40.1293
- 43.2852
- 108.0345
- 111.5242
- 118.4081
- 118.6465
- 121.2685
- 123.7094
- 125.8260
- 126.0549
- 126.6651
- 130.7077
- 132.8435
- 134.6455
- 134.8839
- 136.2759
- 141.9681
- 145.0382
- 156.1937
- 162.3244

X : parts per Million : 13C

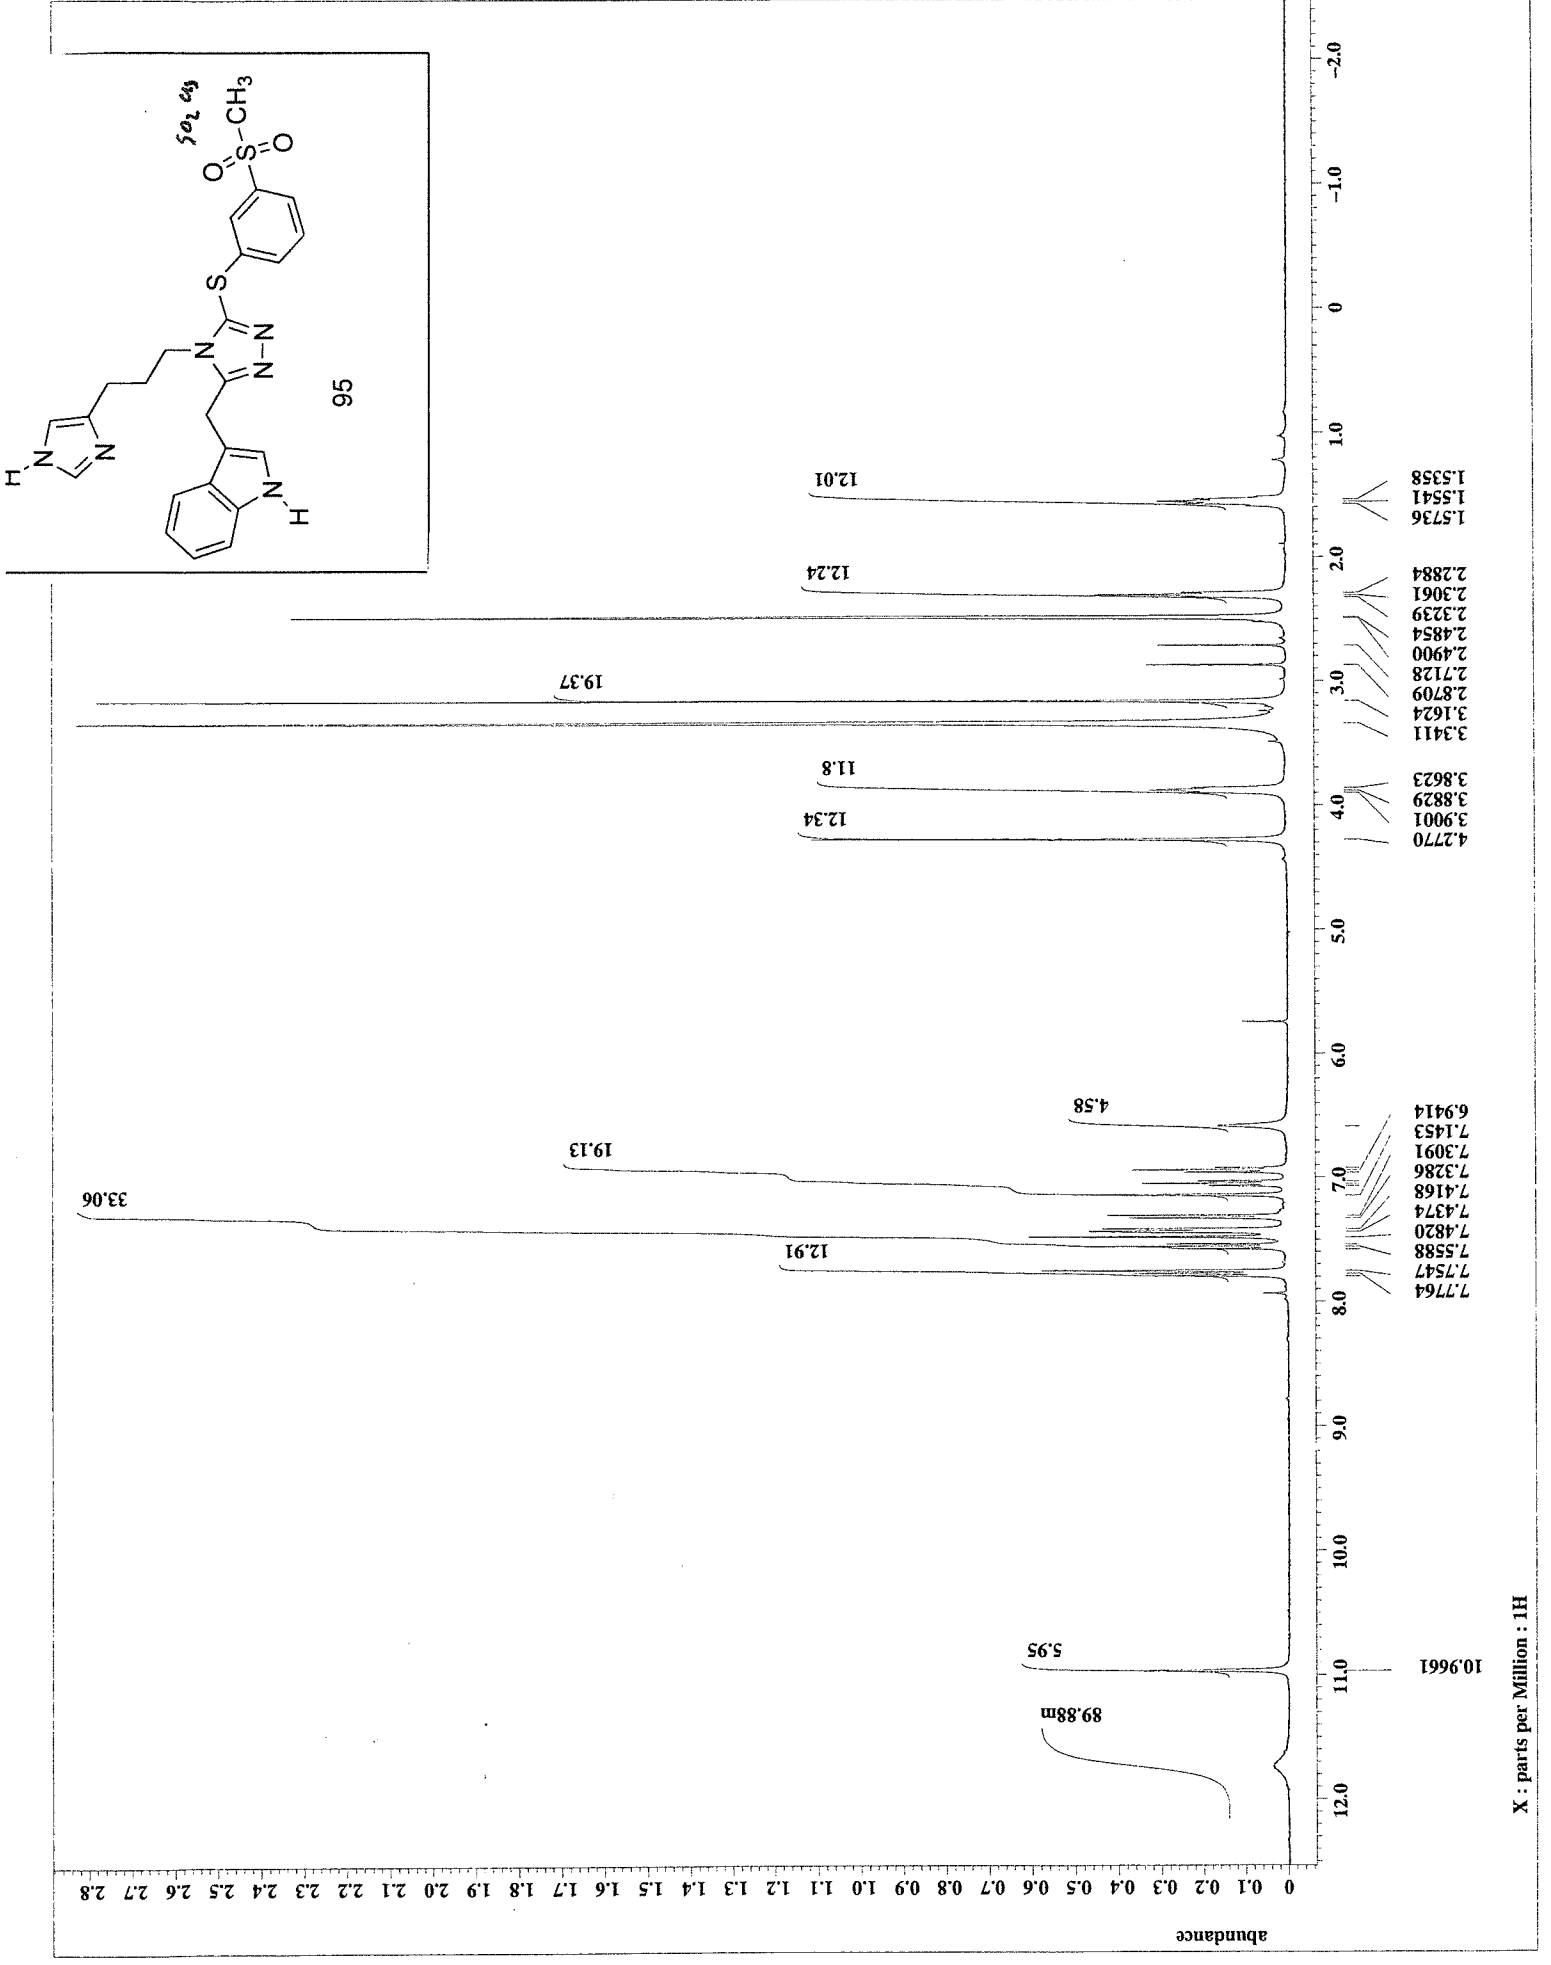

X : parts per Million : 1H

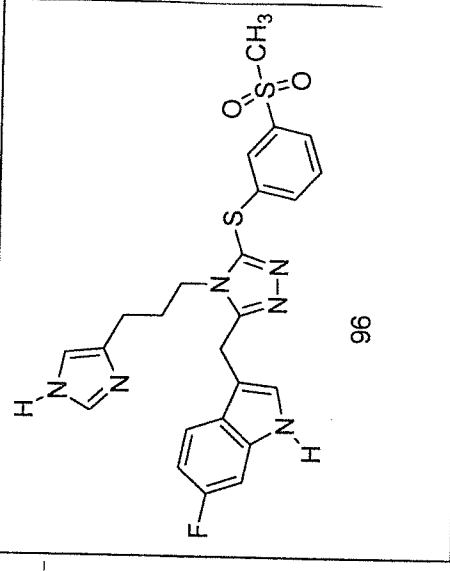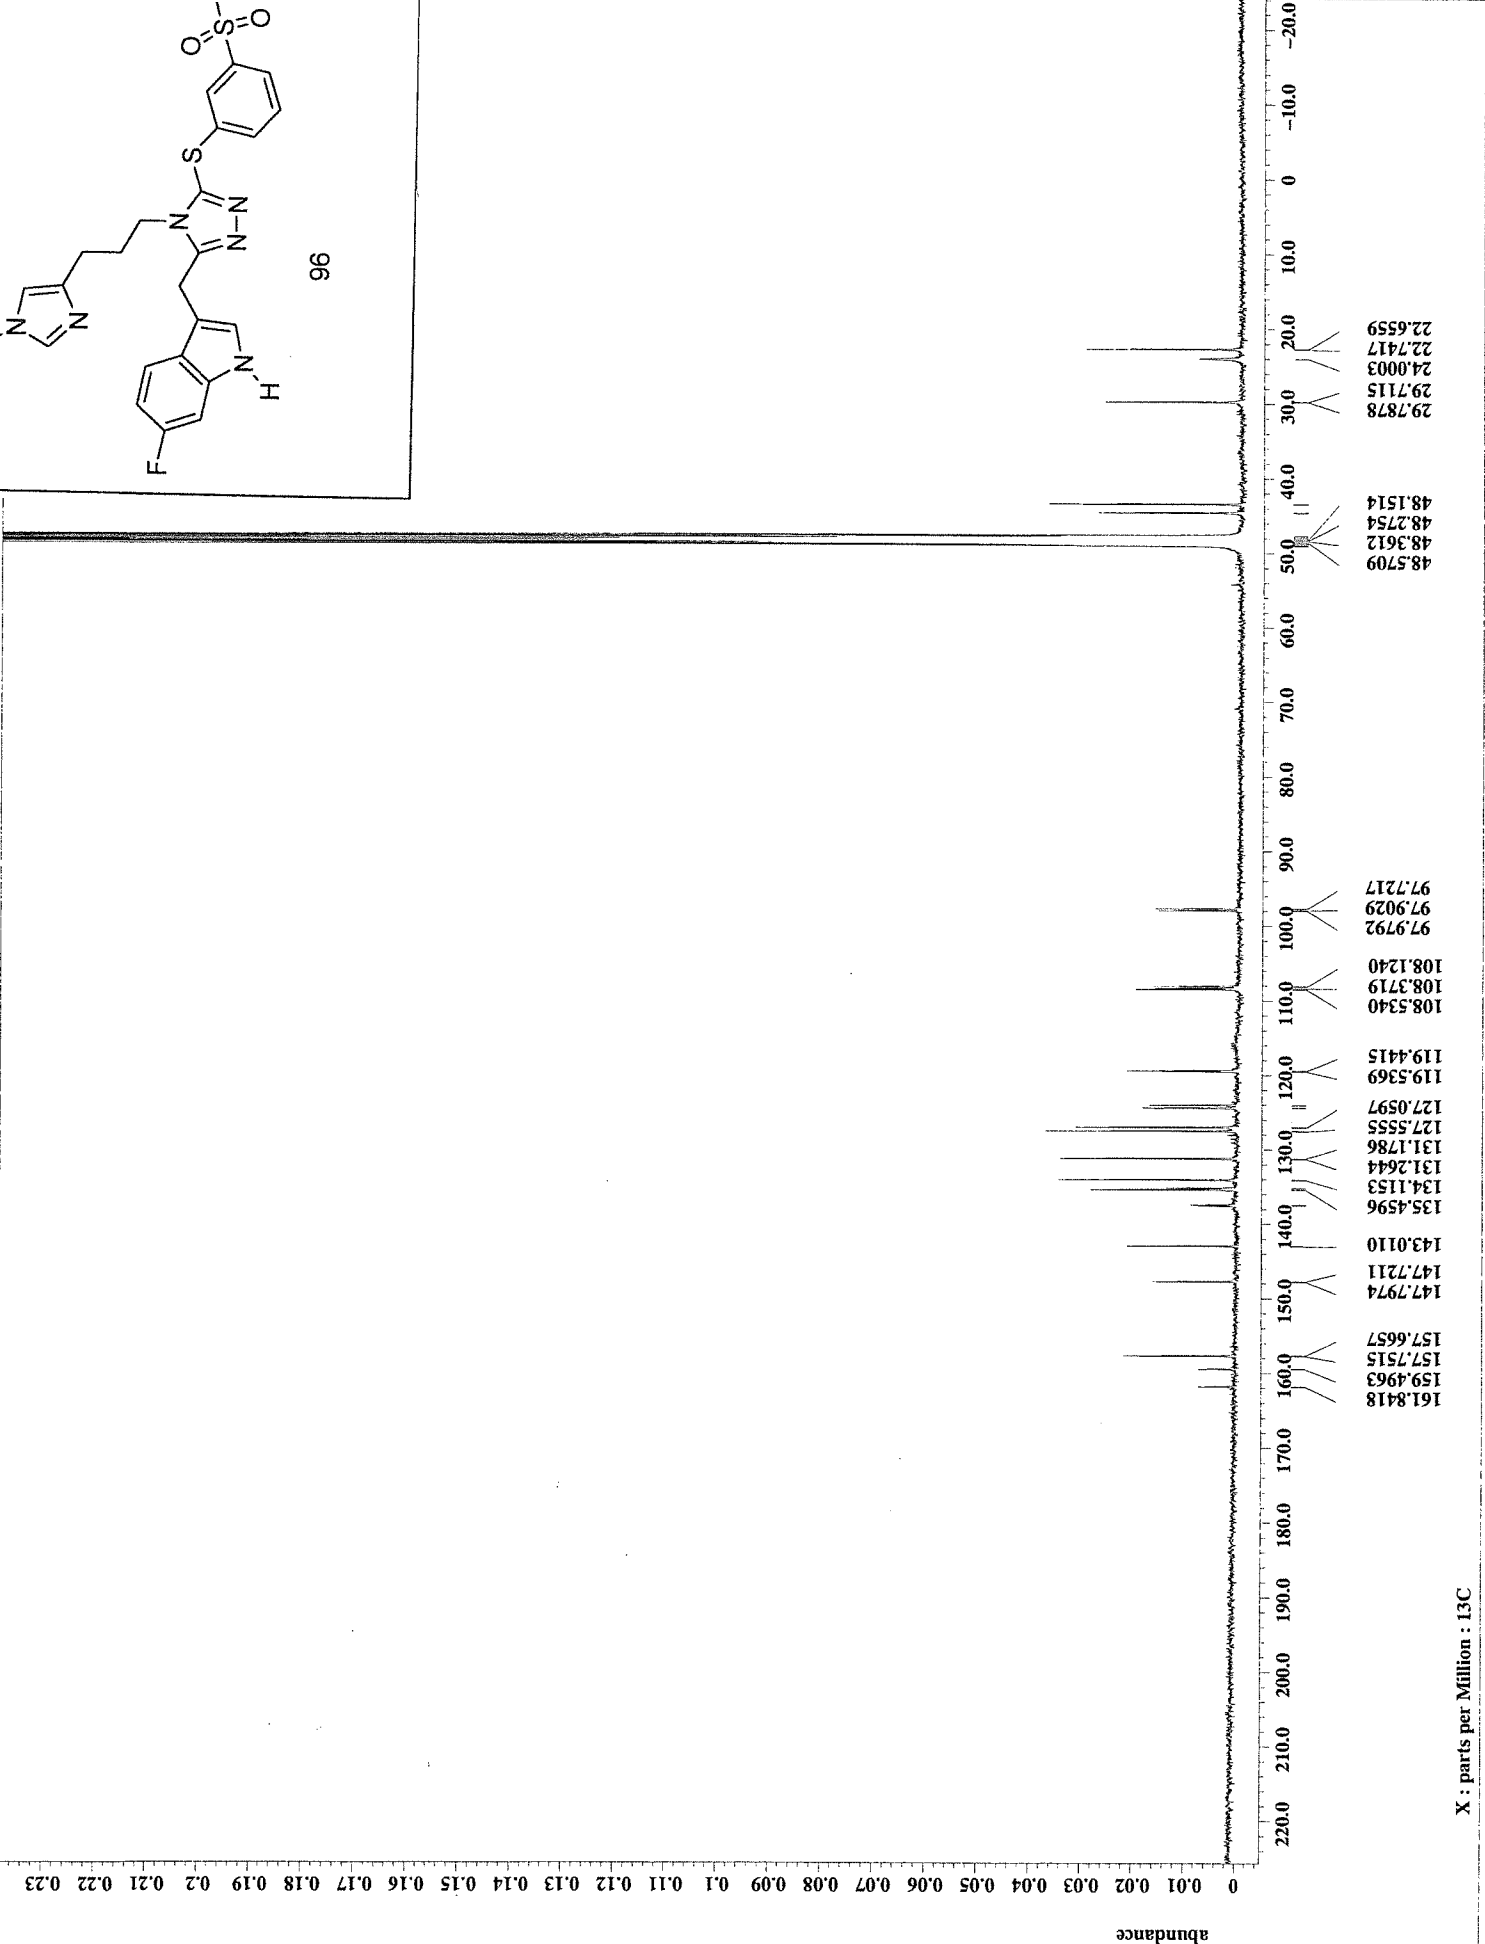

X : parts per Million : 13C

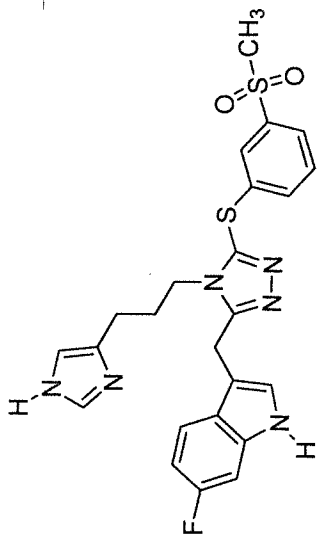

96

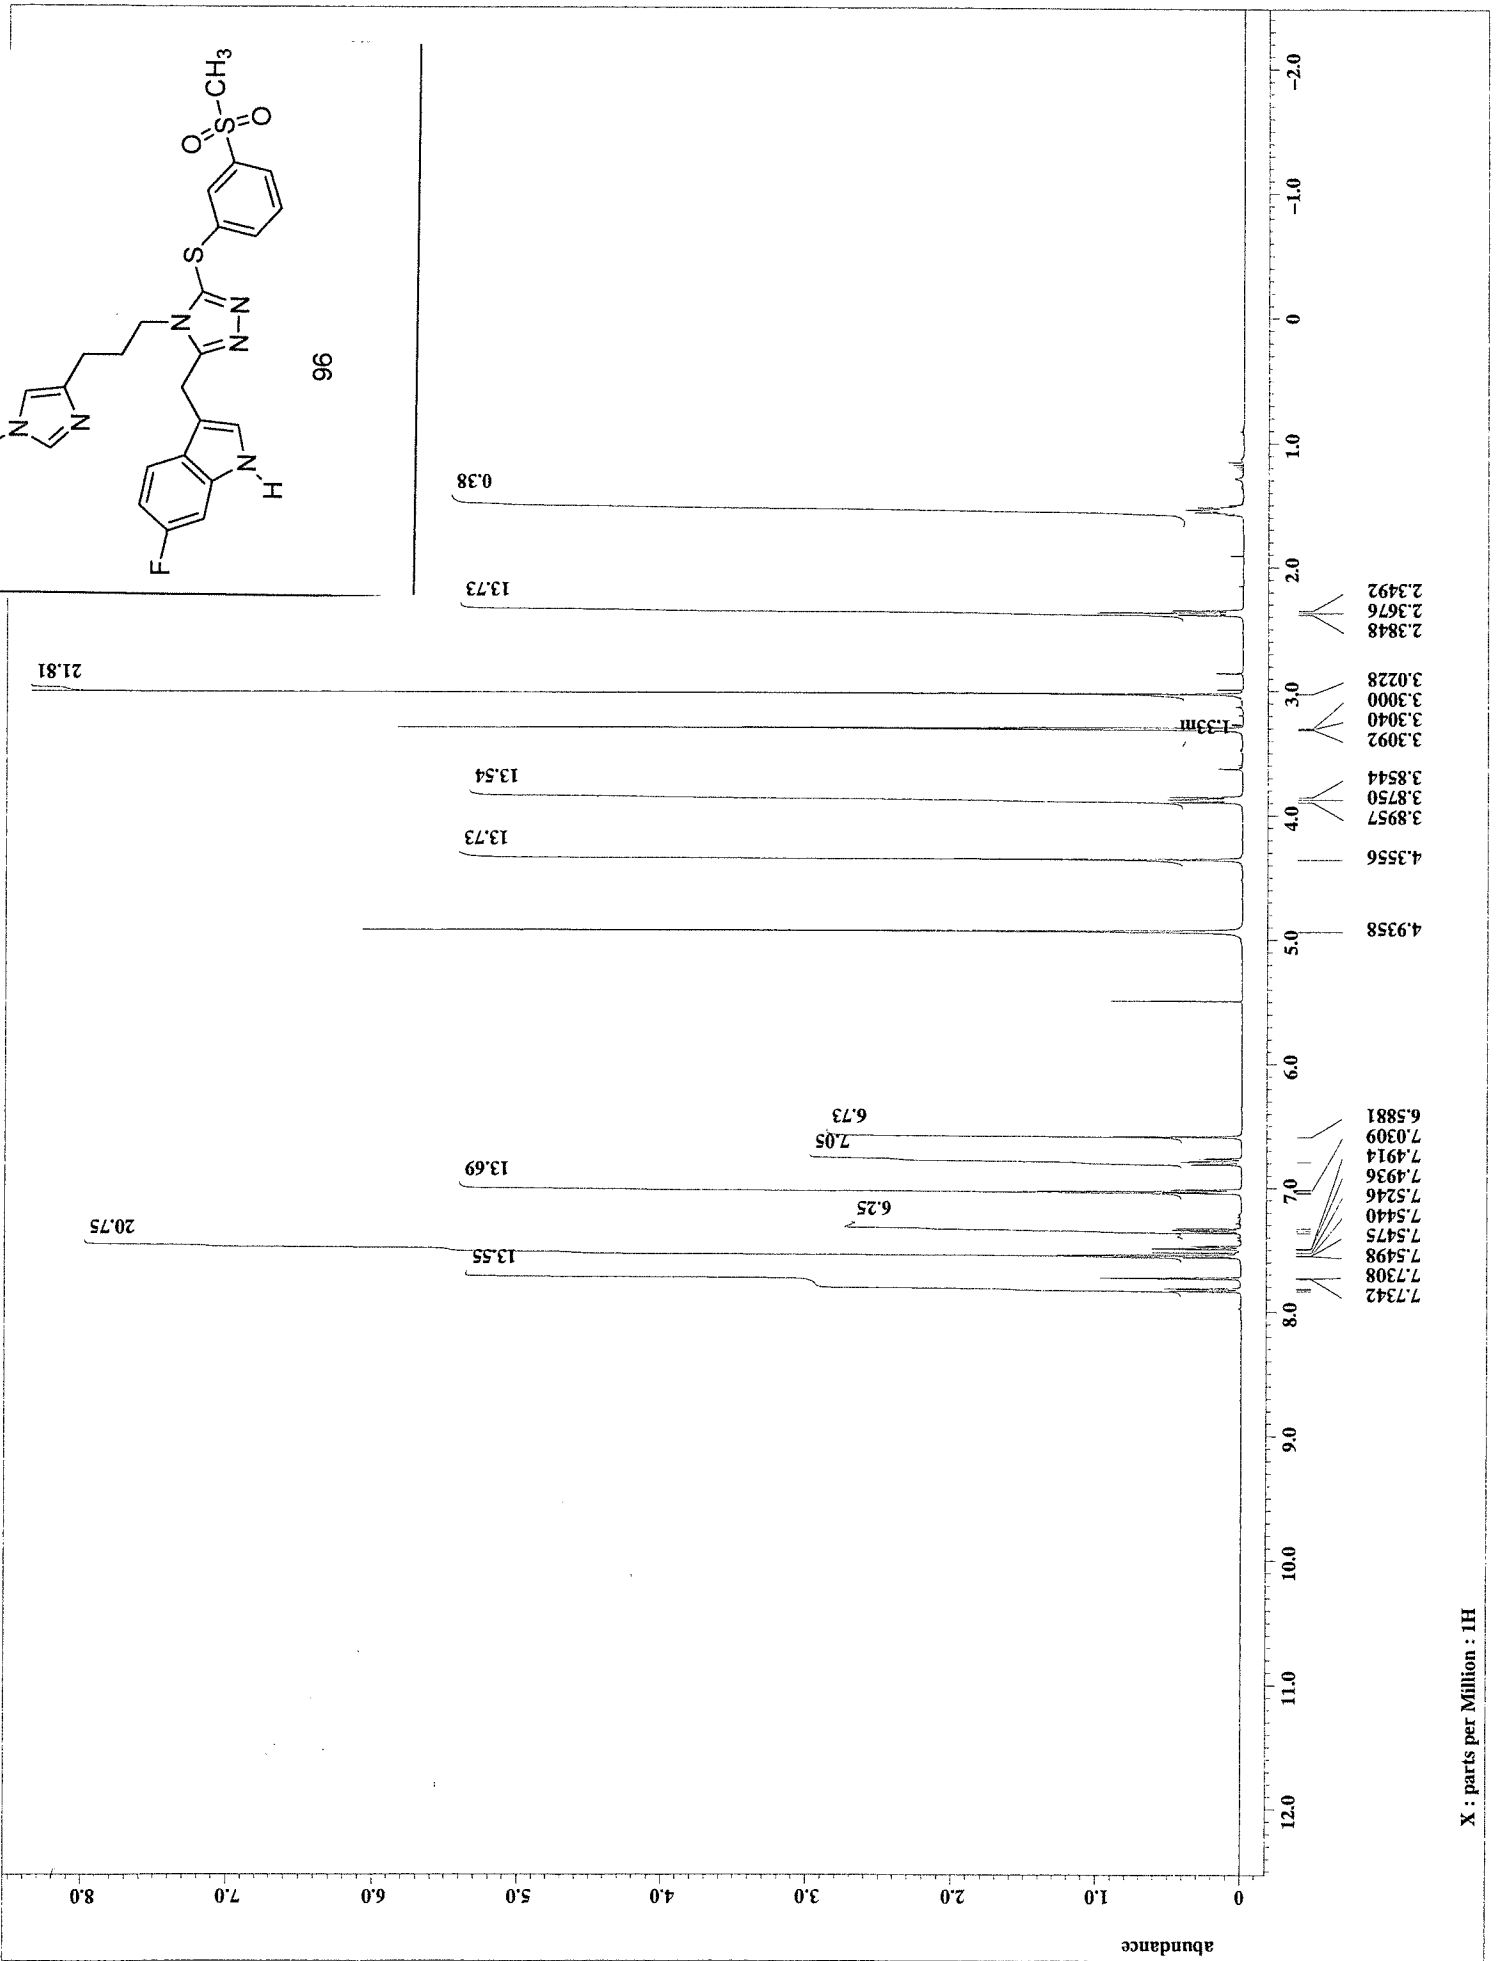

X : parts per Million :  $^1\text{H}$

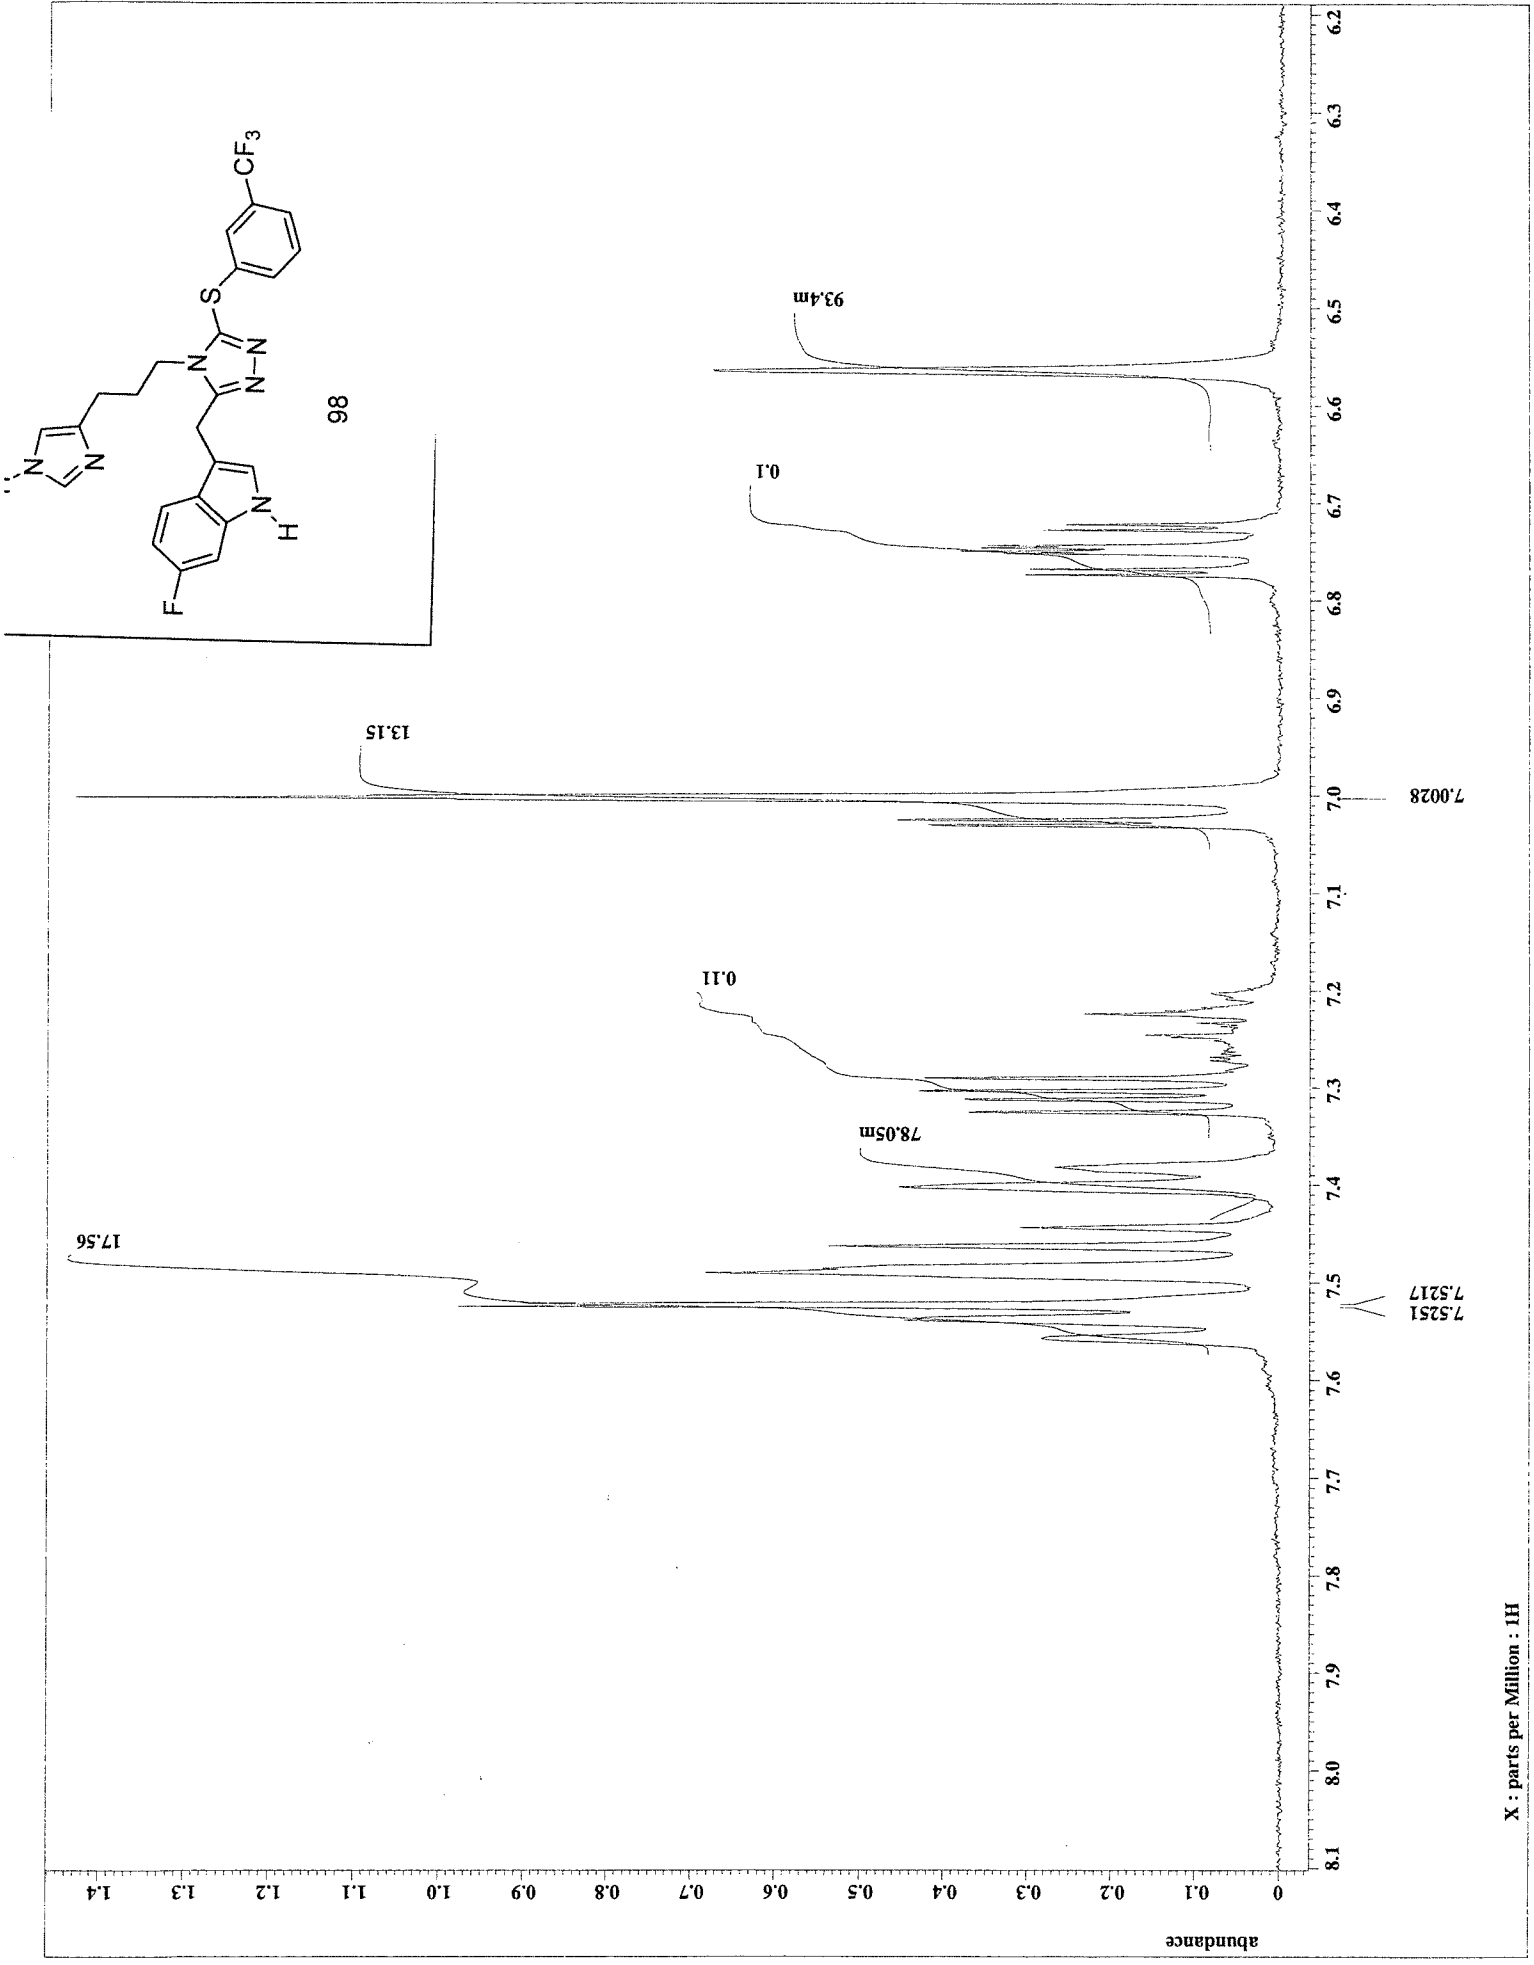

X : parts per Million : 1H

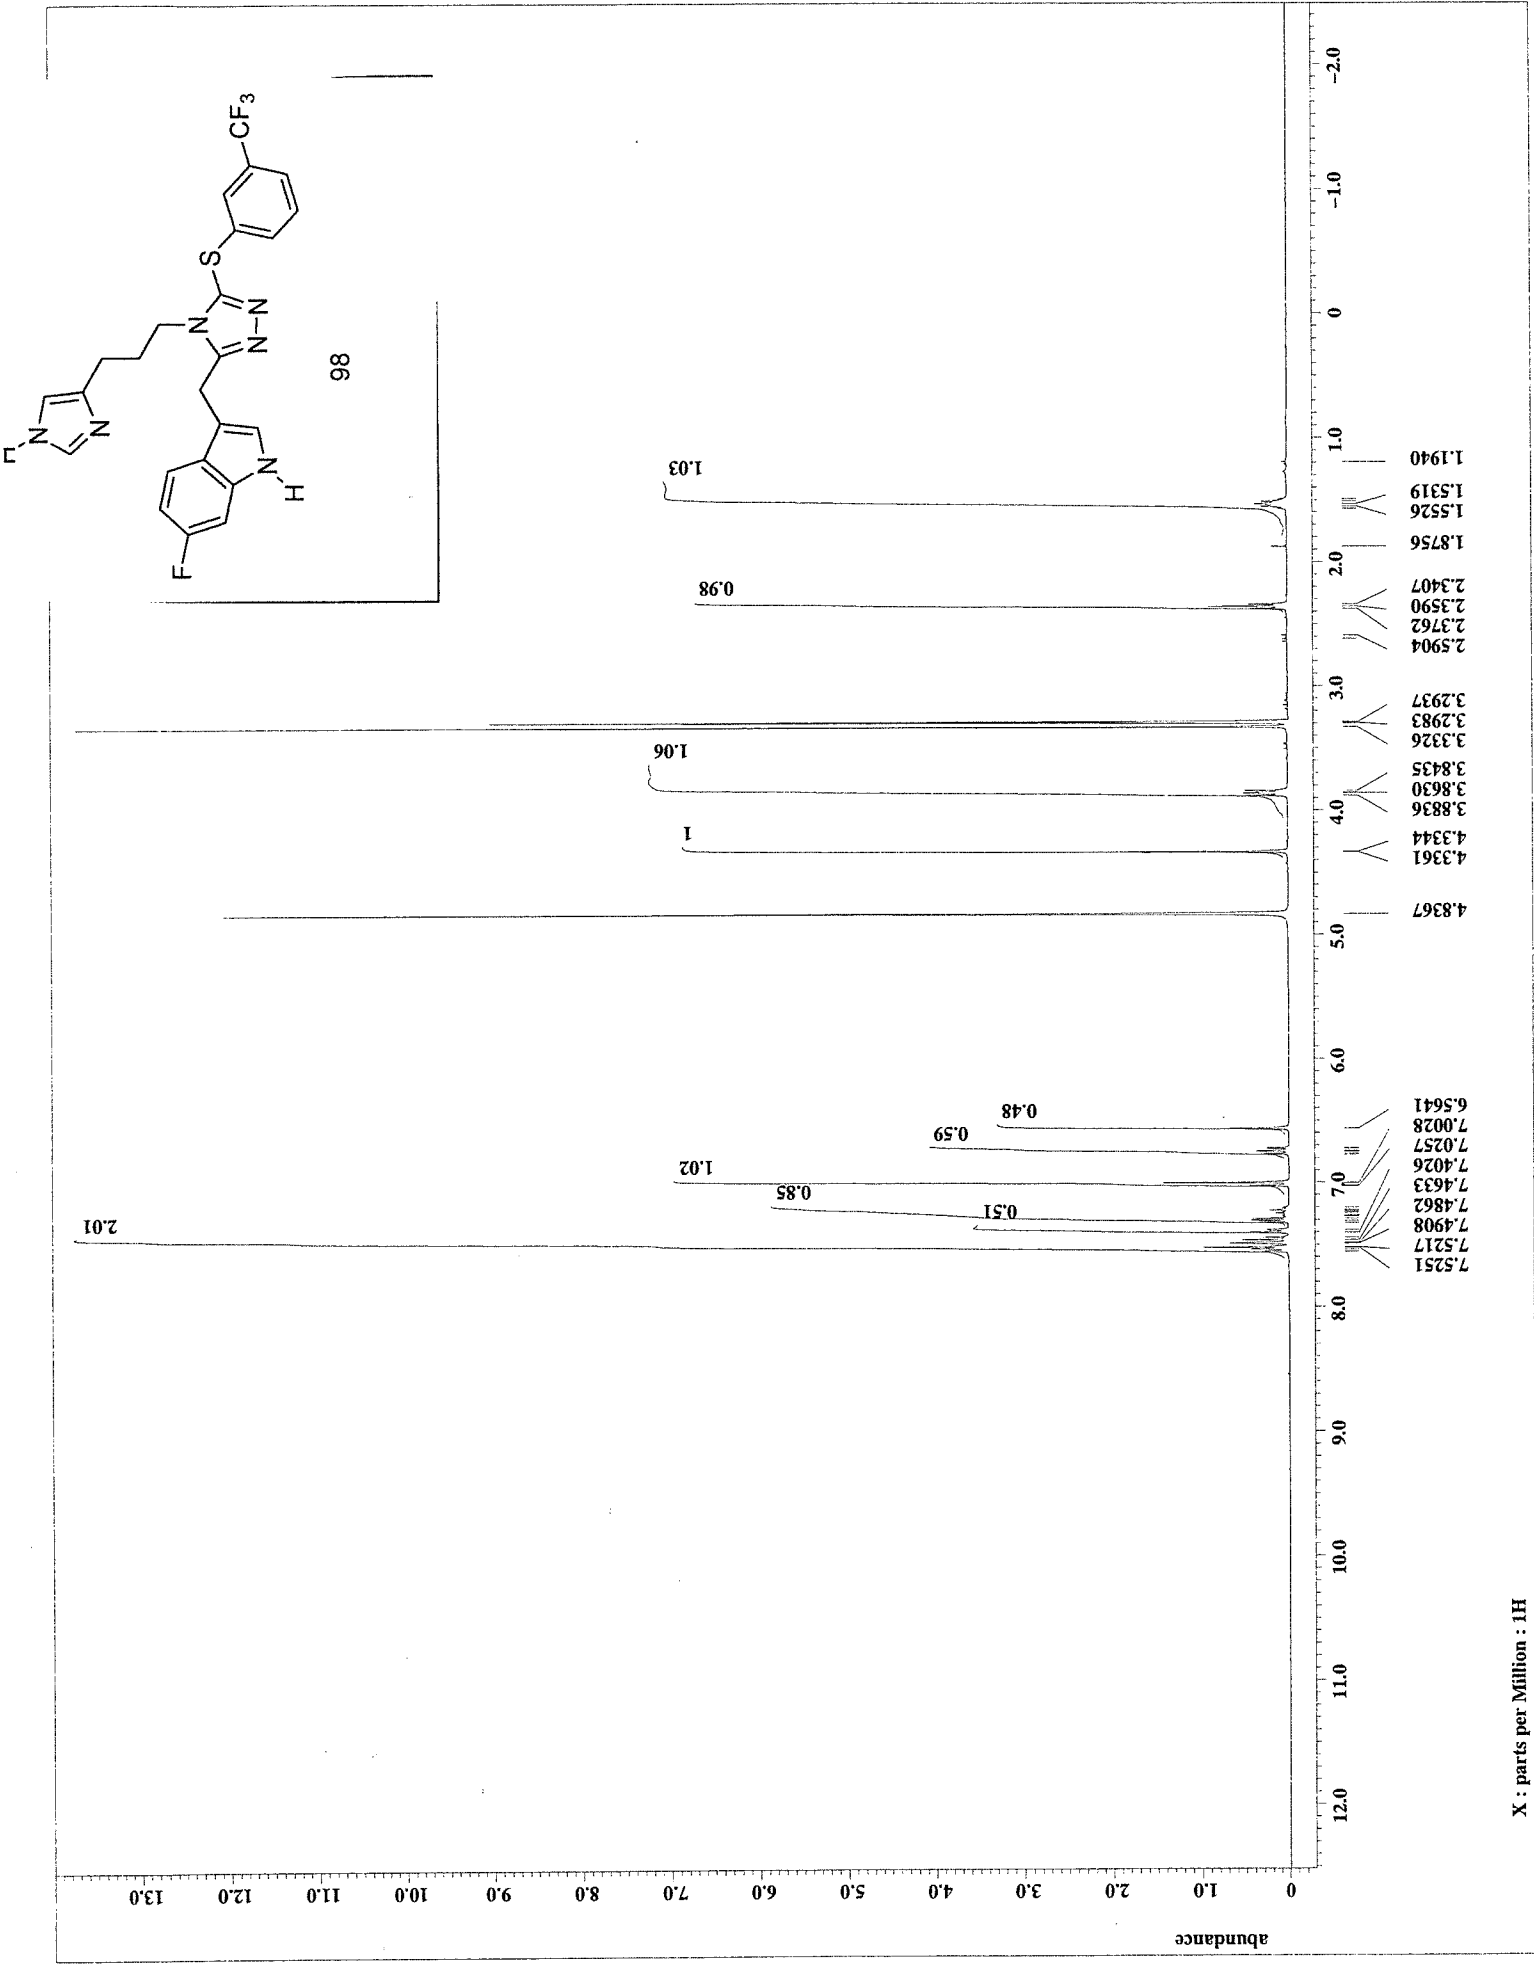

X : parts per Million : 1H

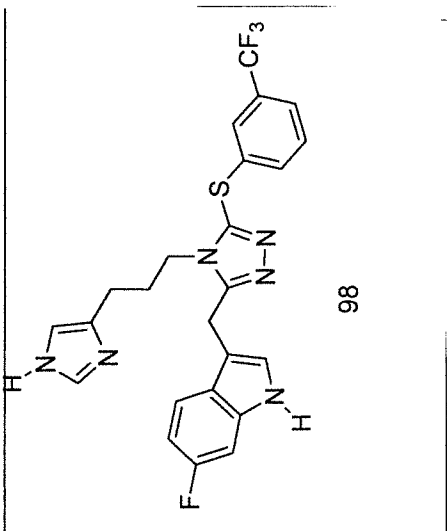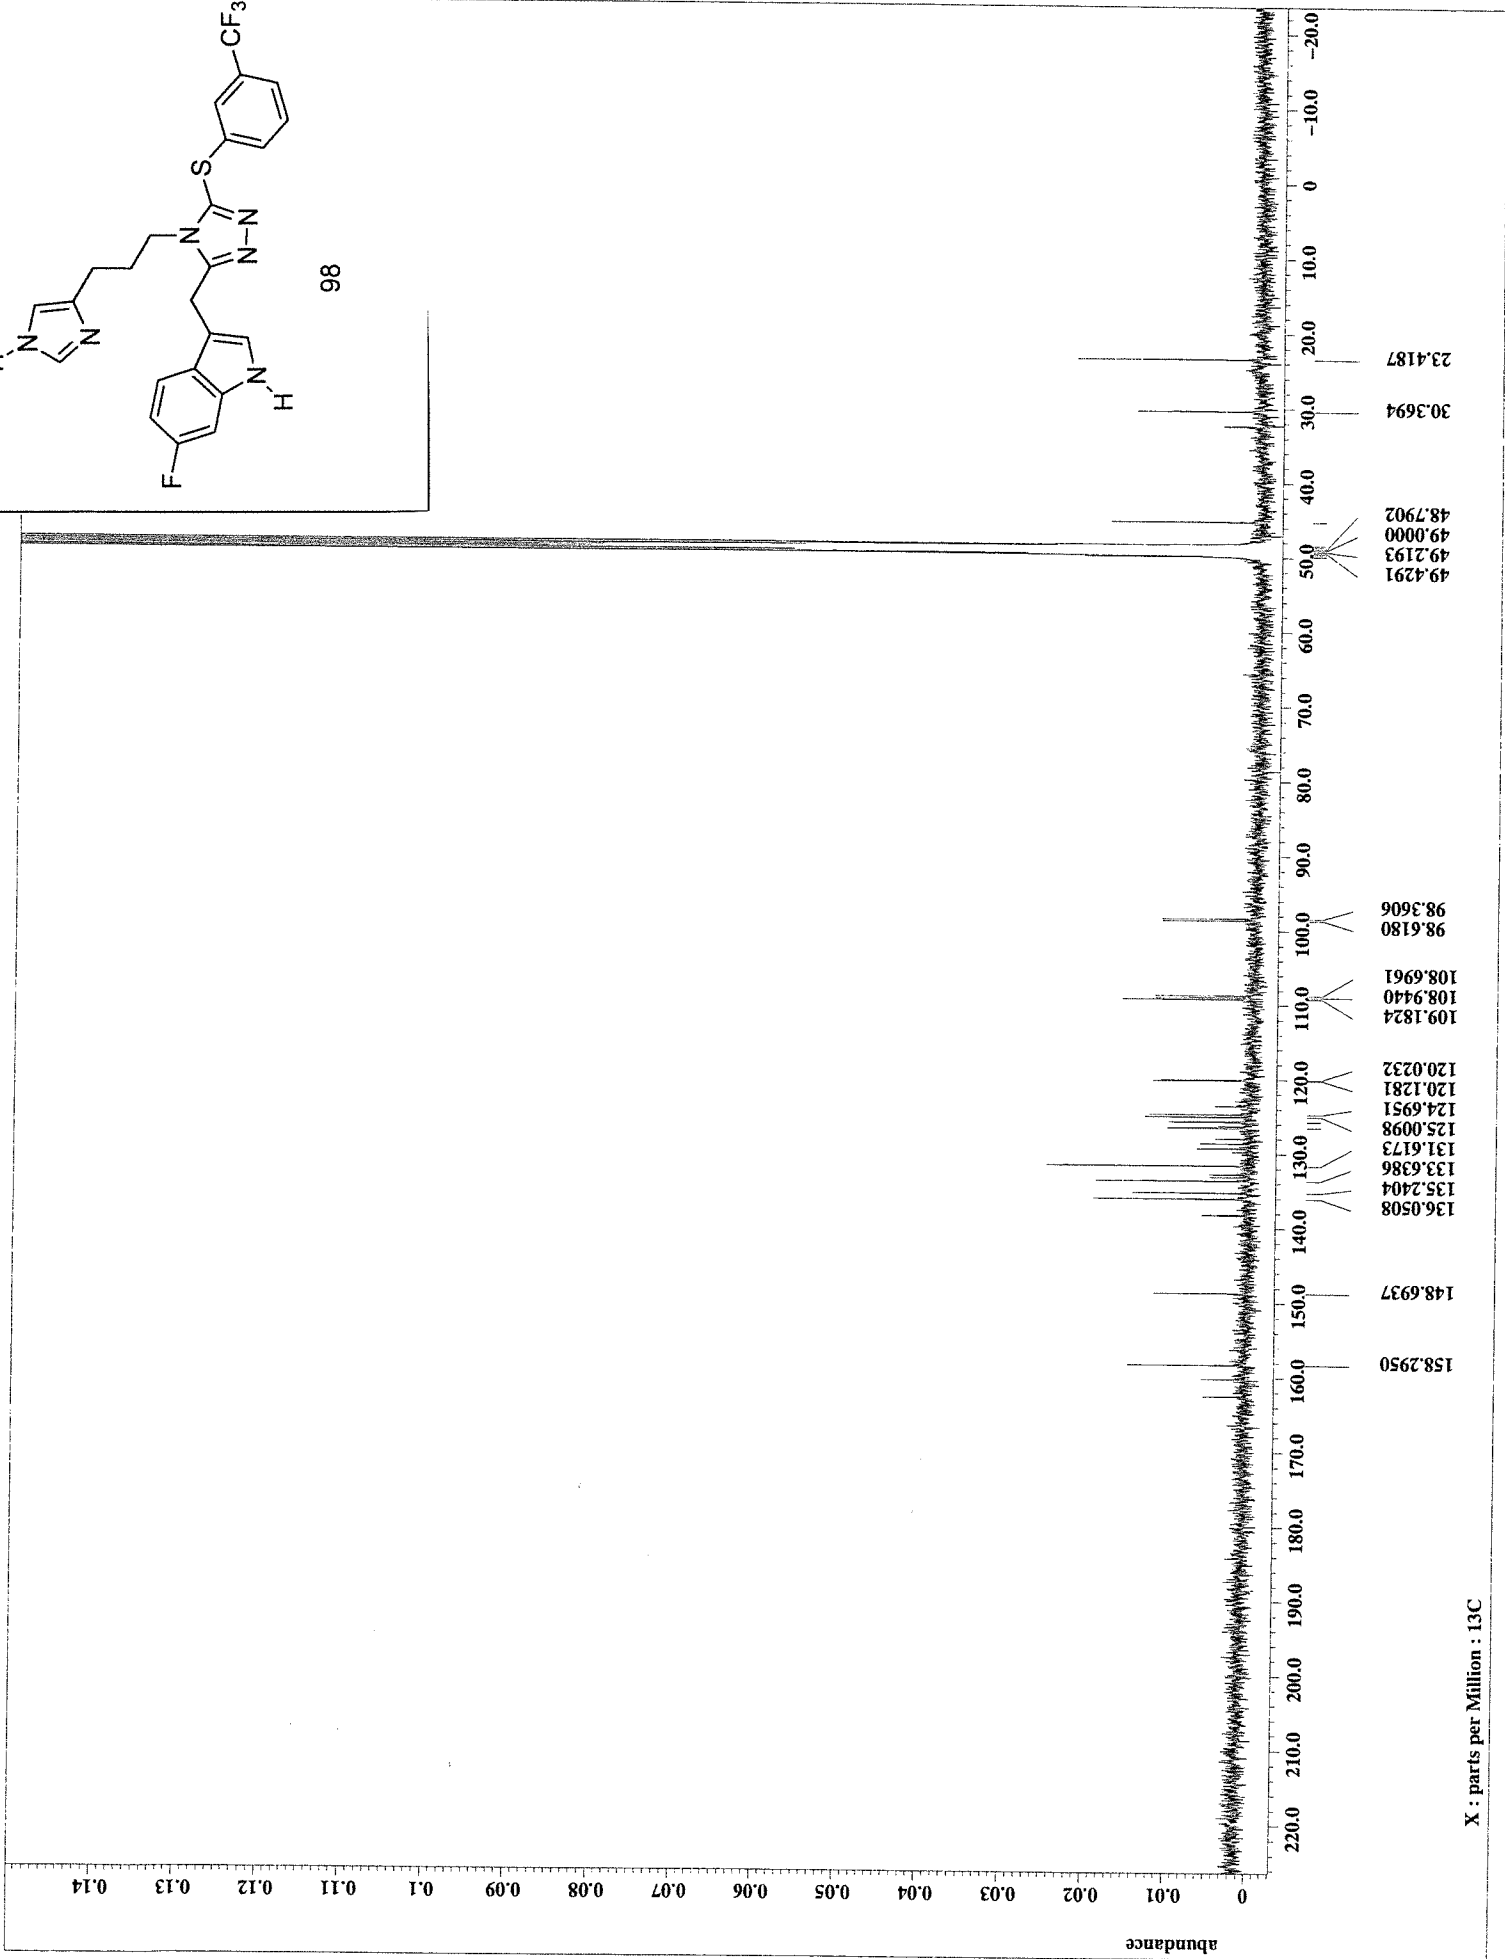

X : parts per Million : 13C



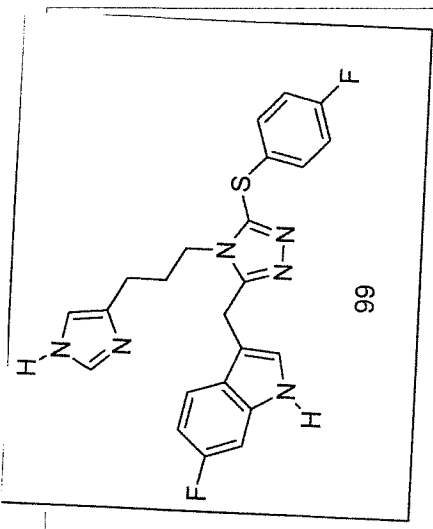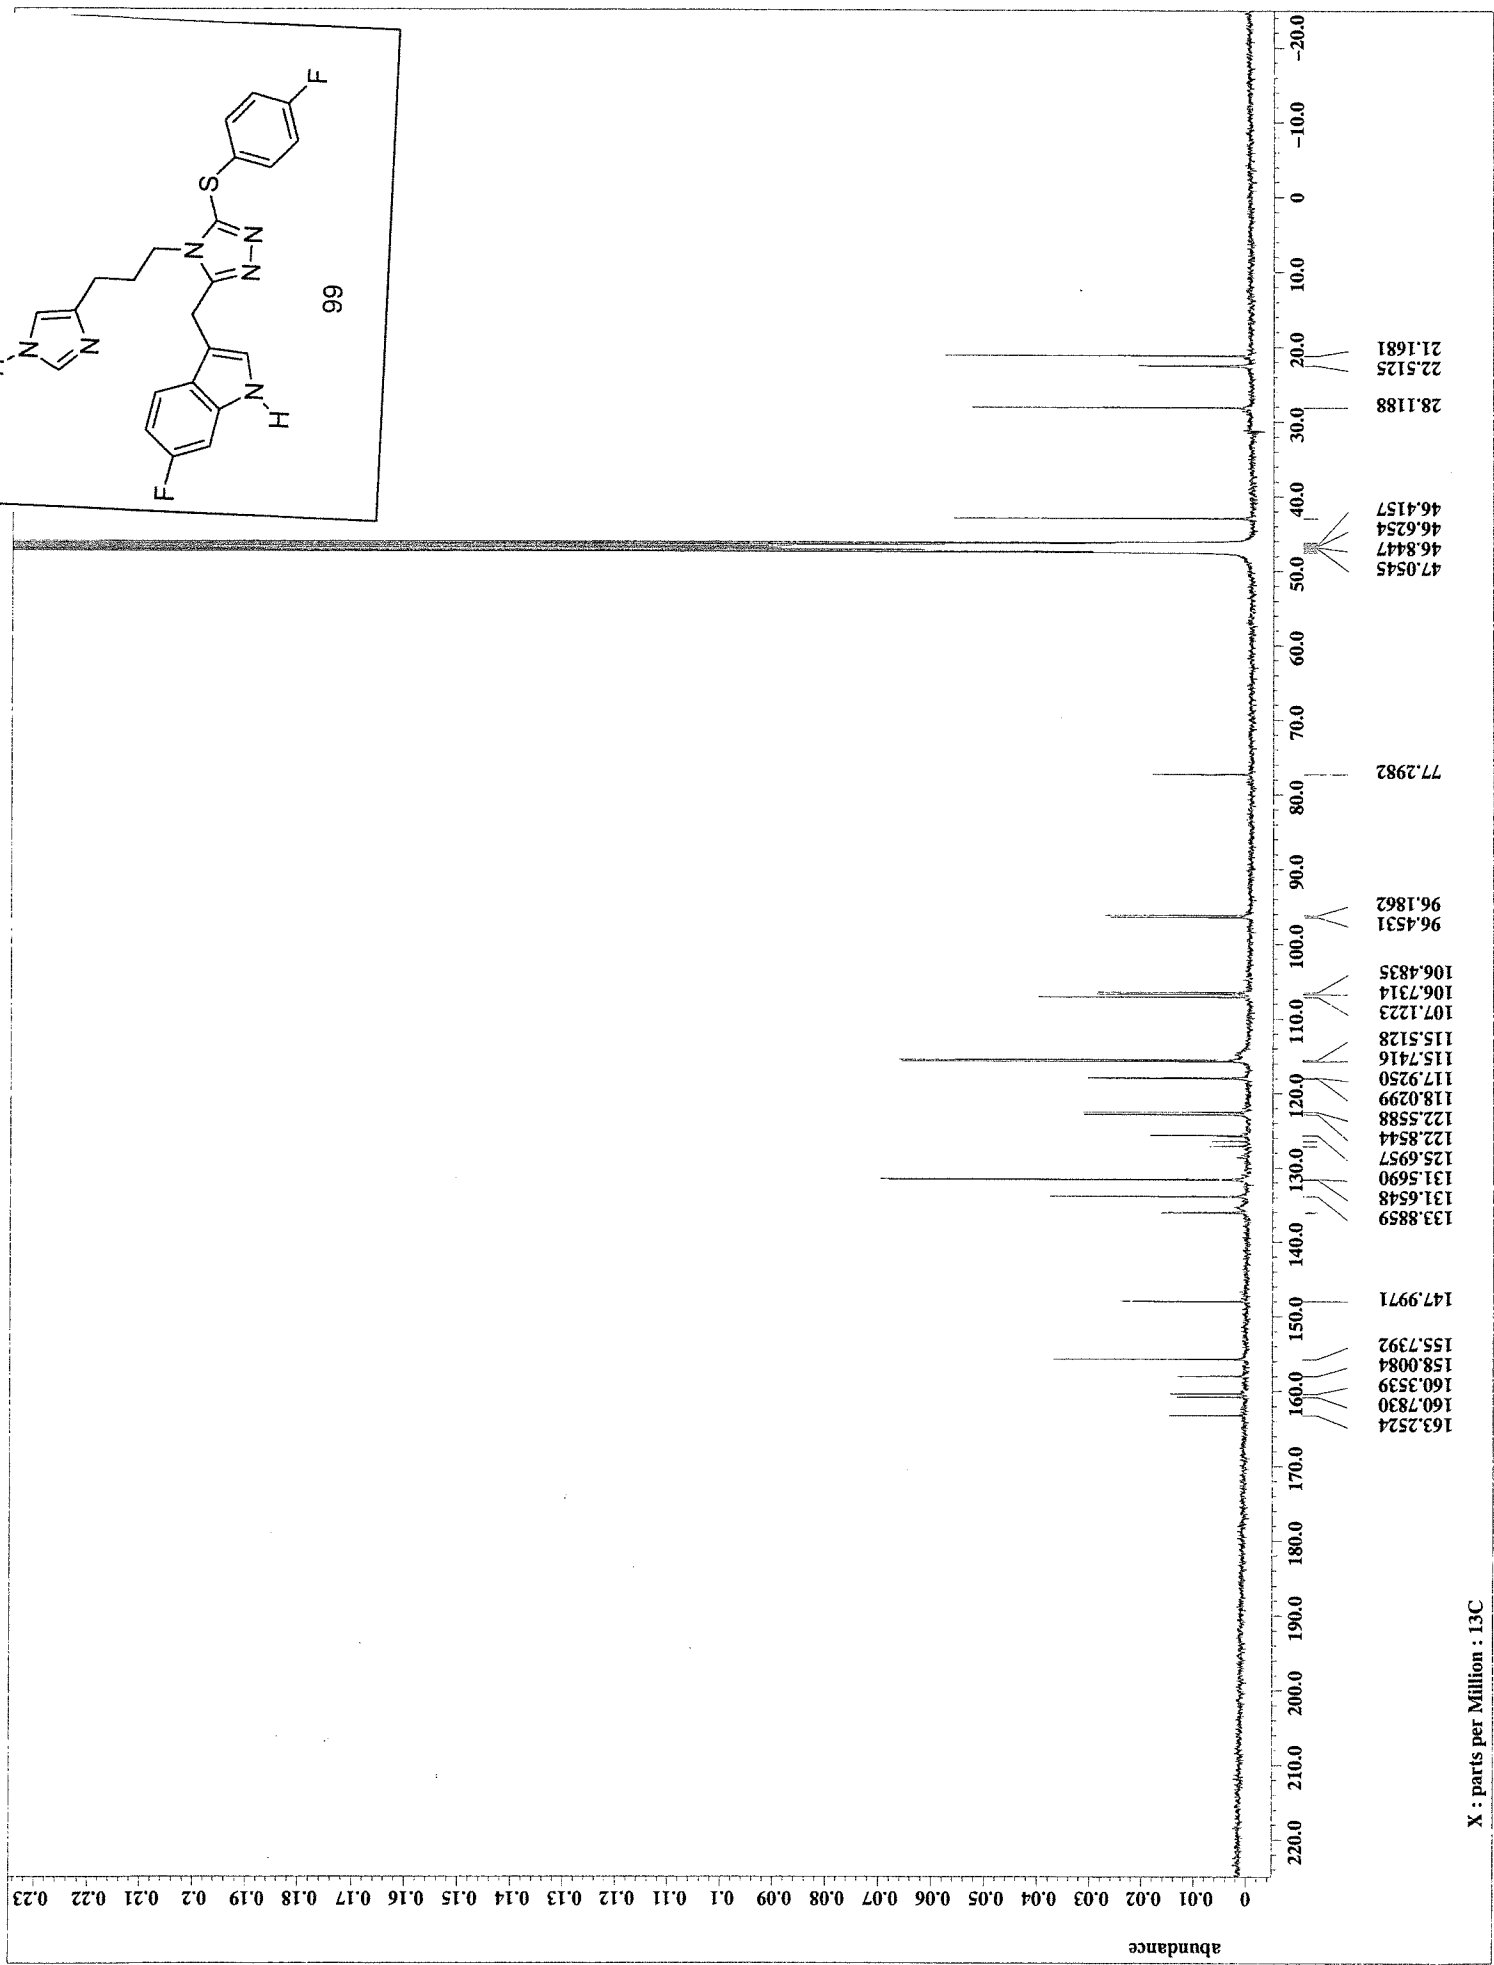

X : parts per Million : 13C

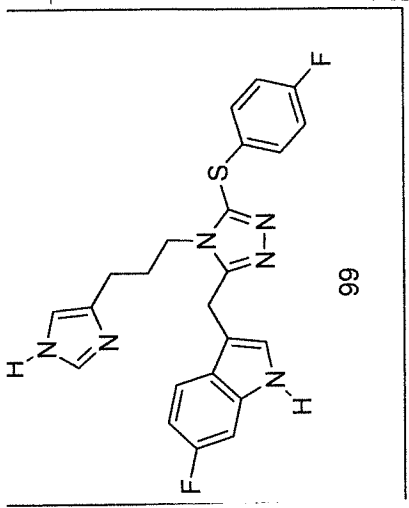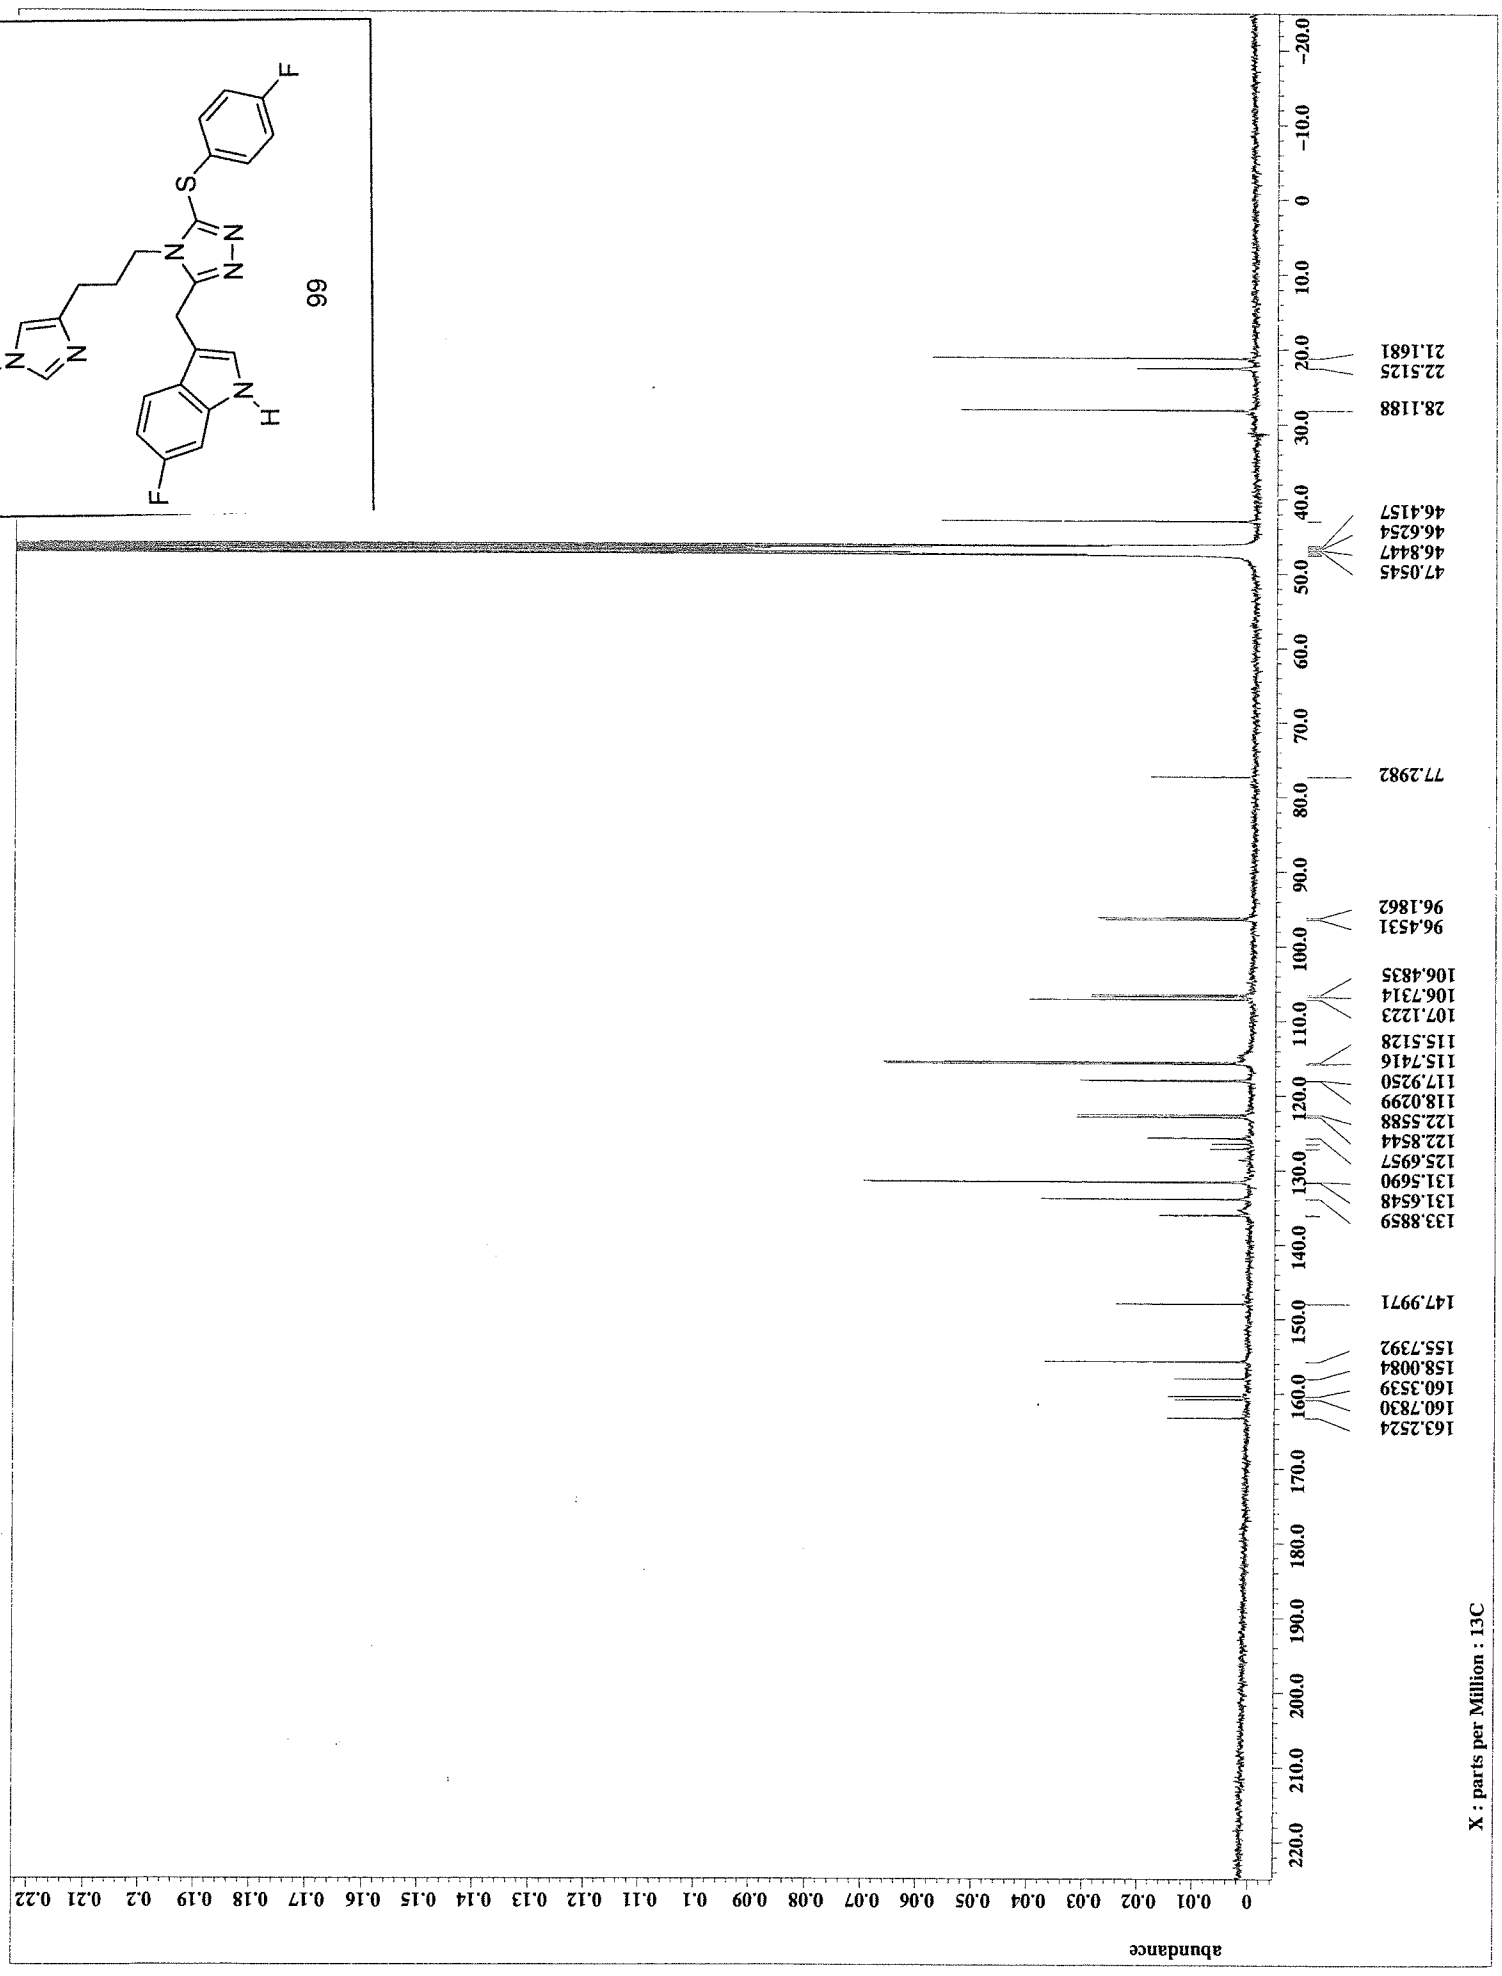

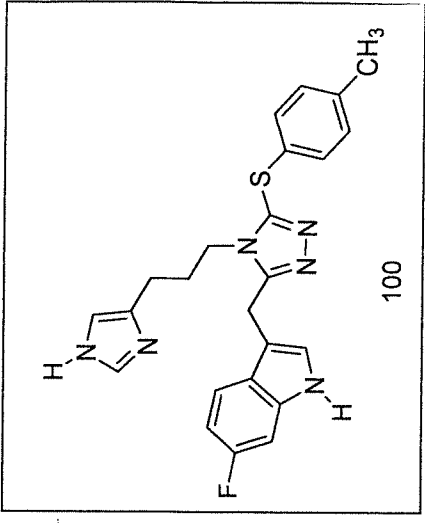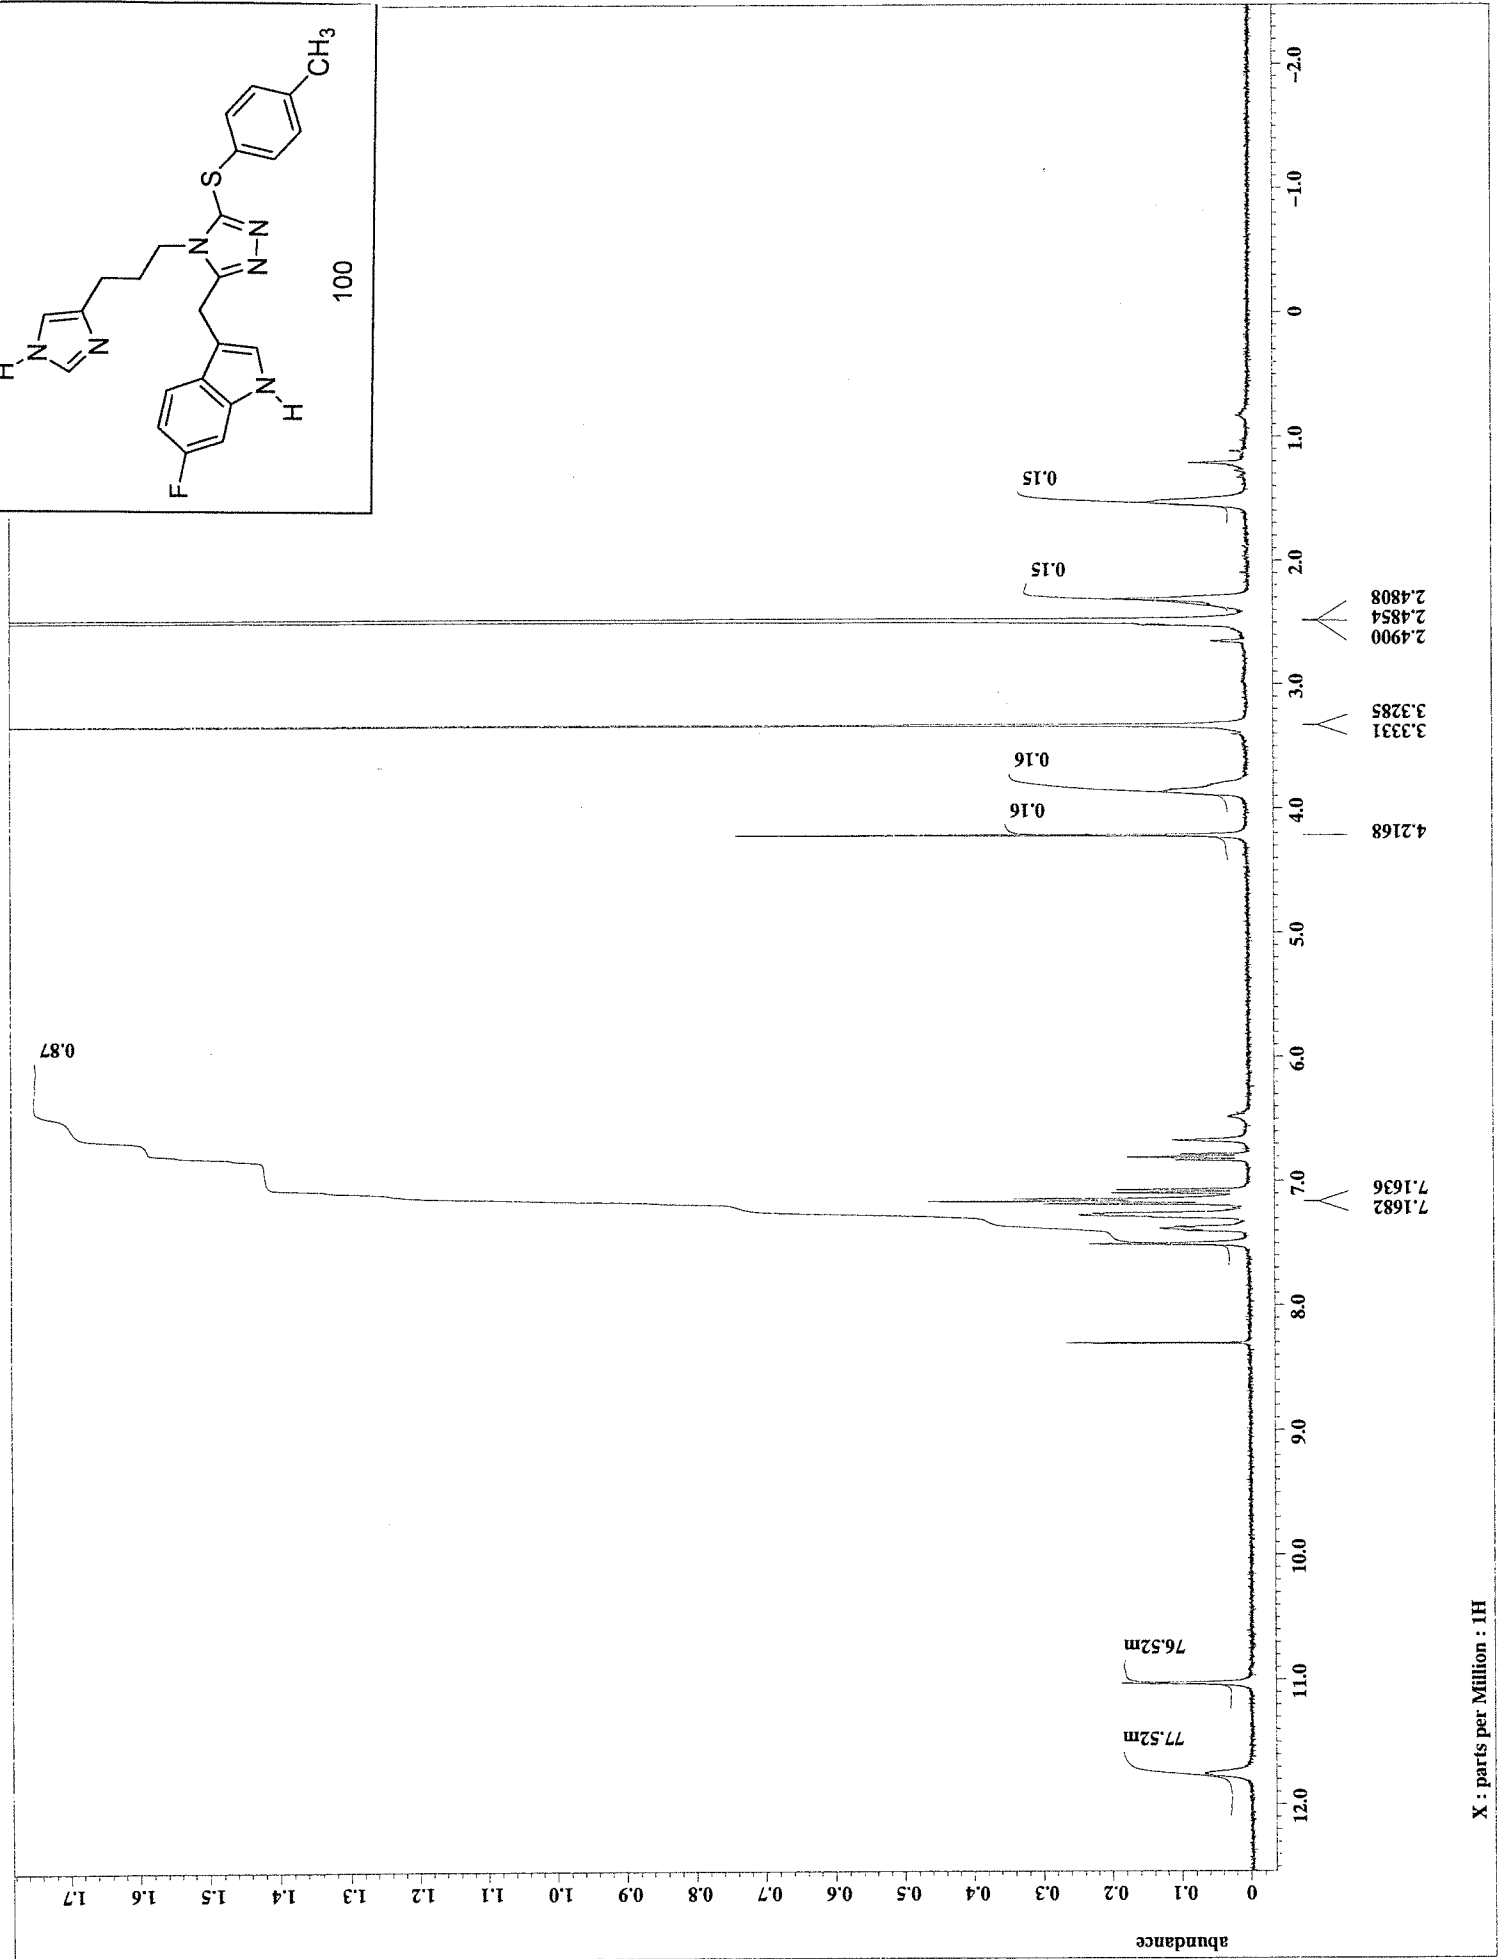

X : parts per Million : 1H

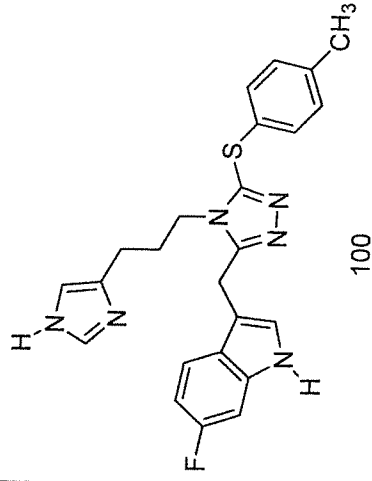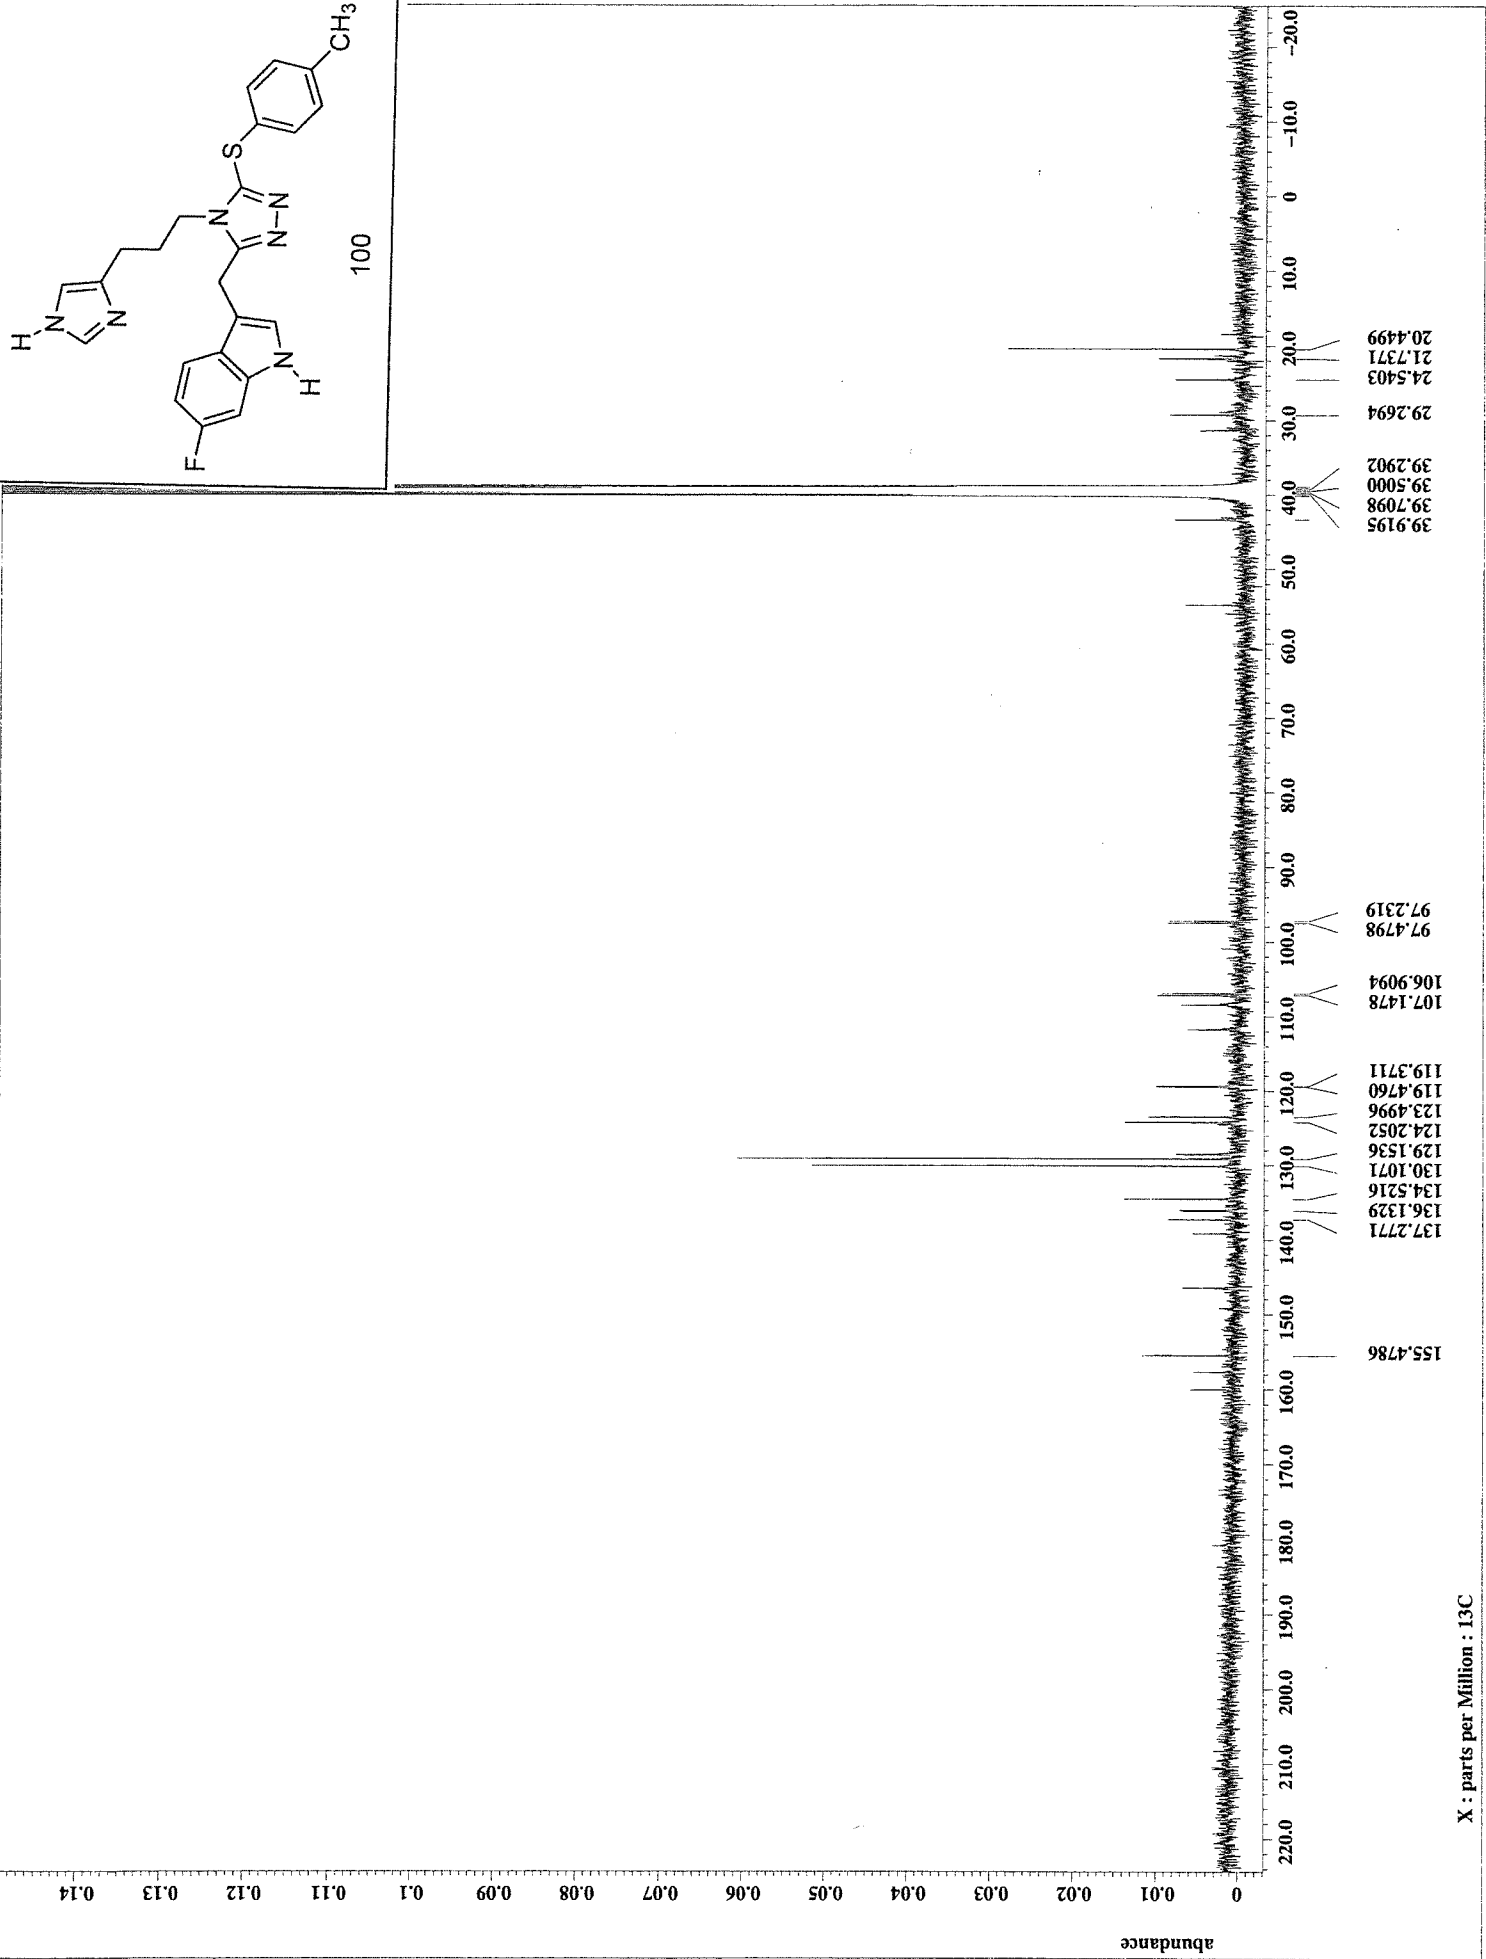

X : parts per Million : 13C

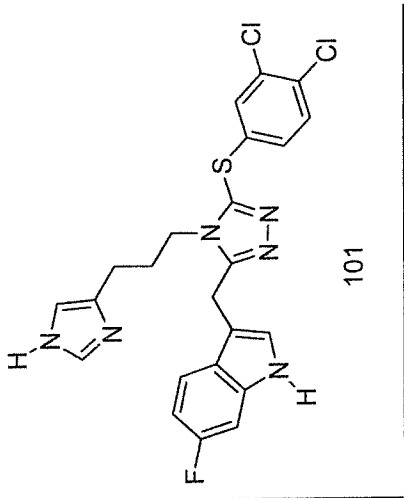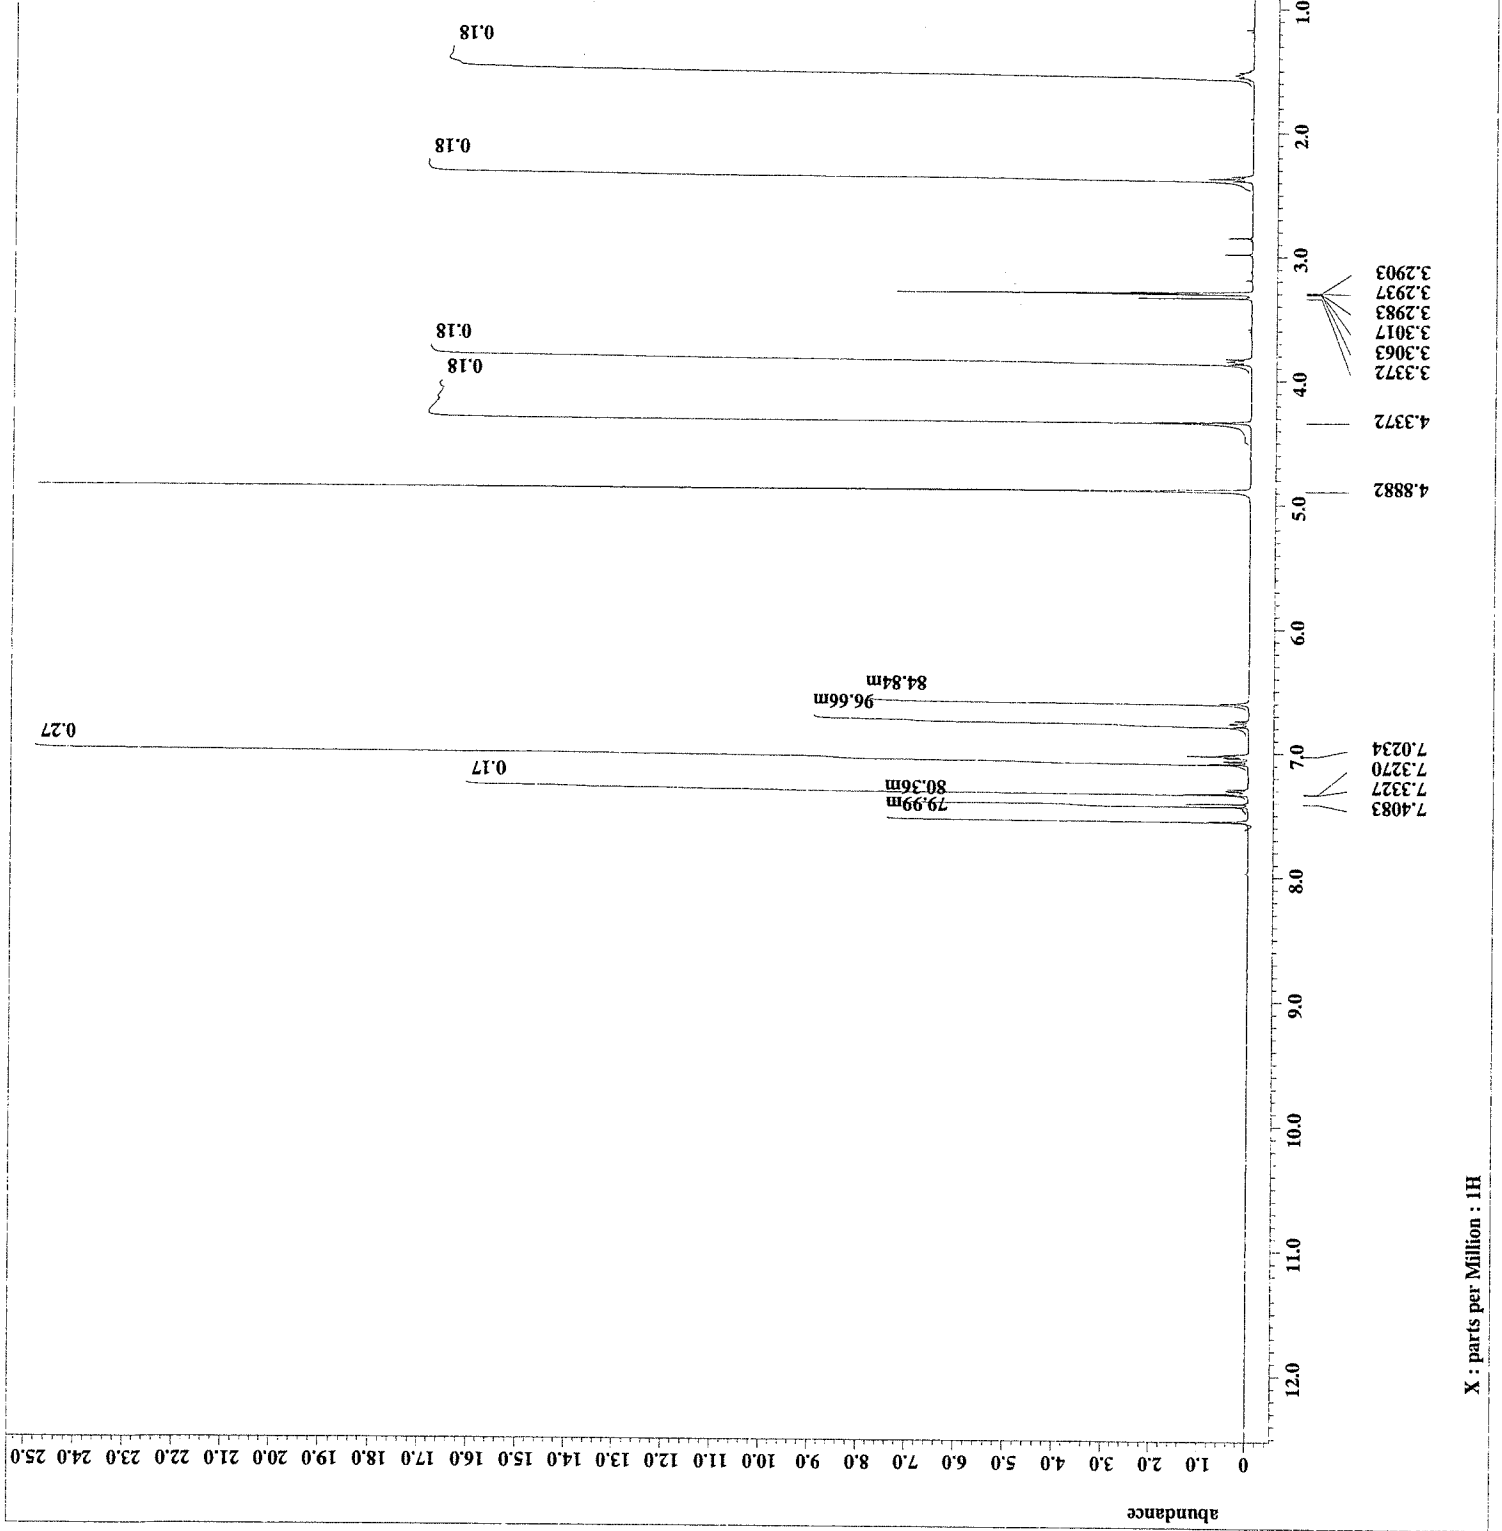

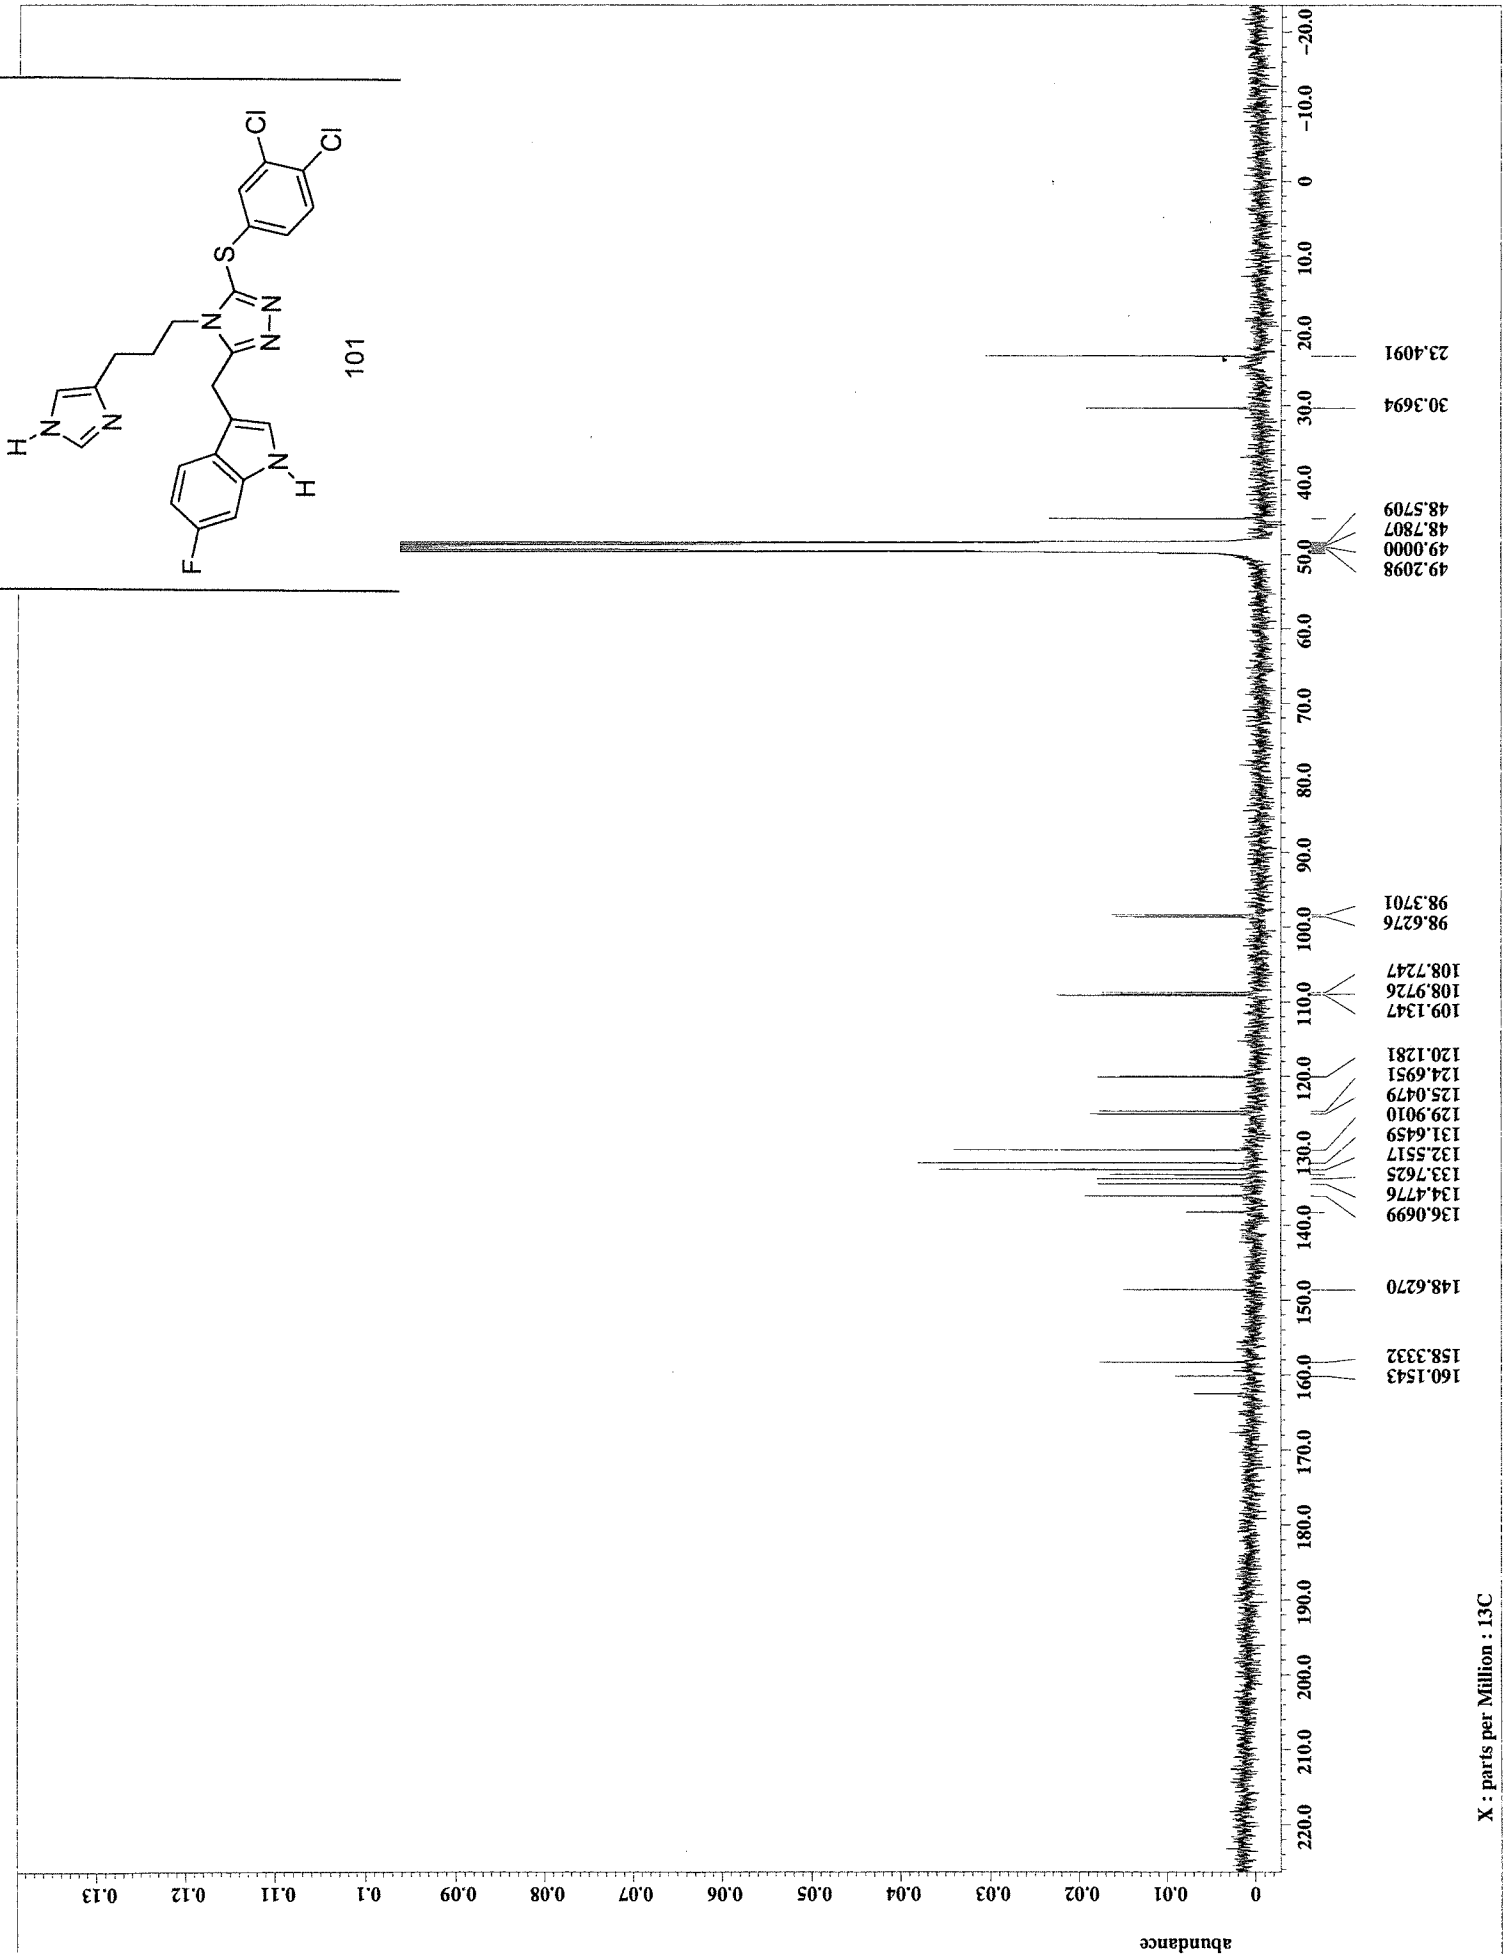

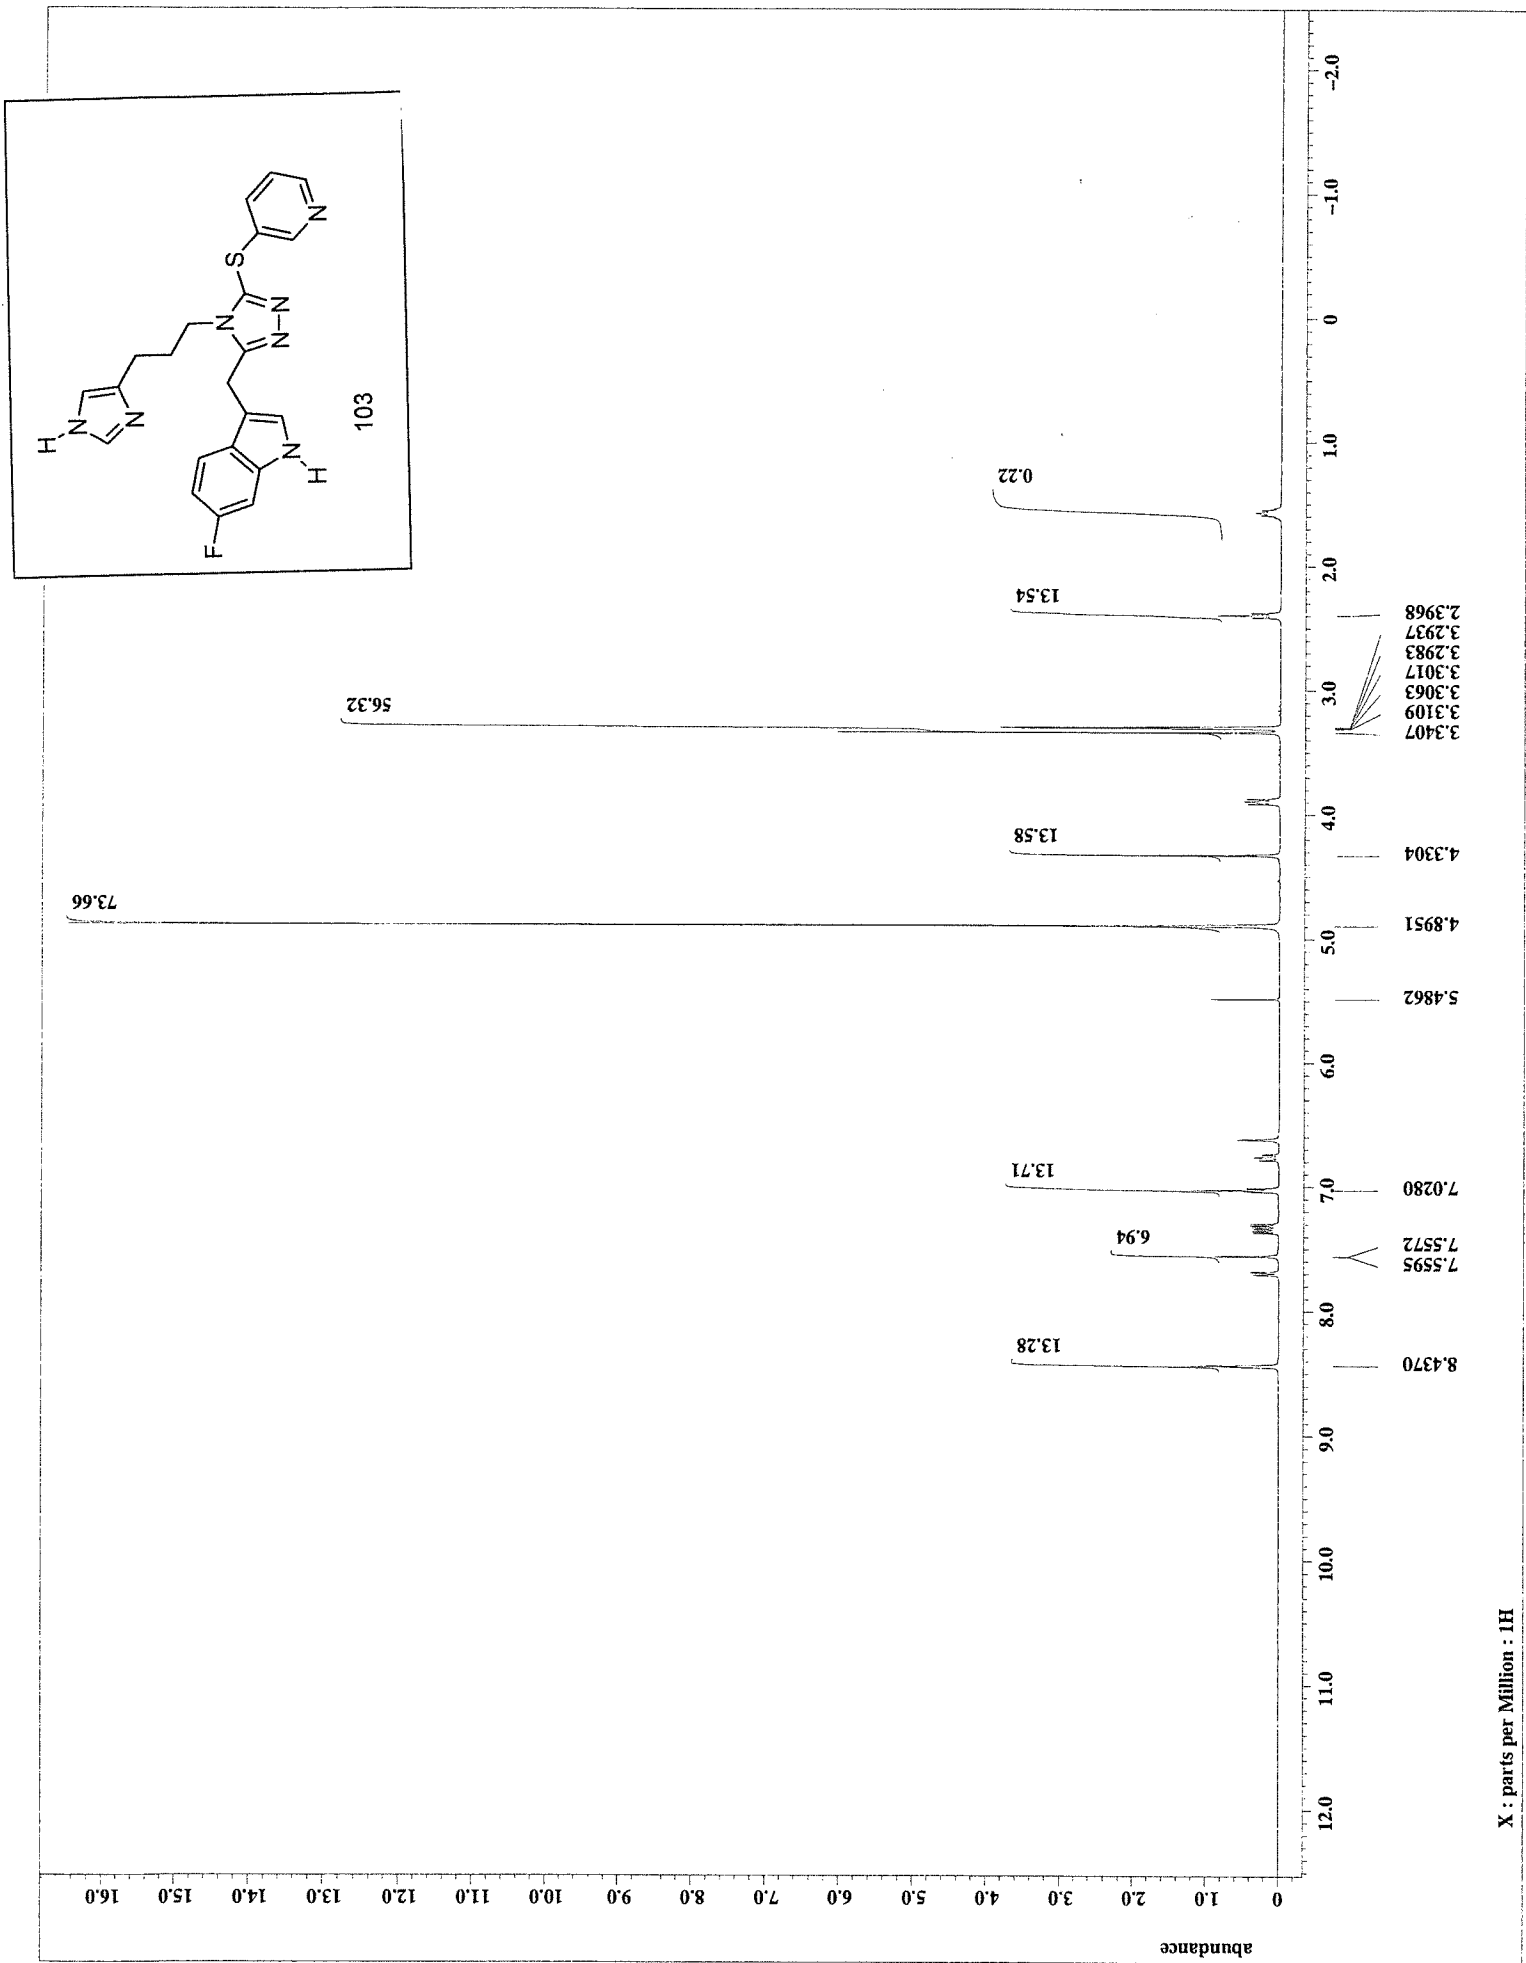

X : parts per Million : 1H

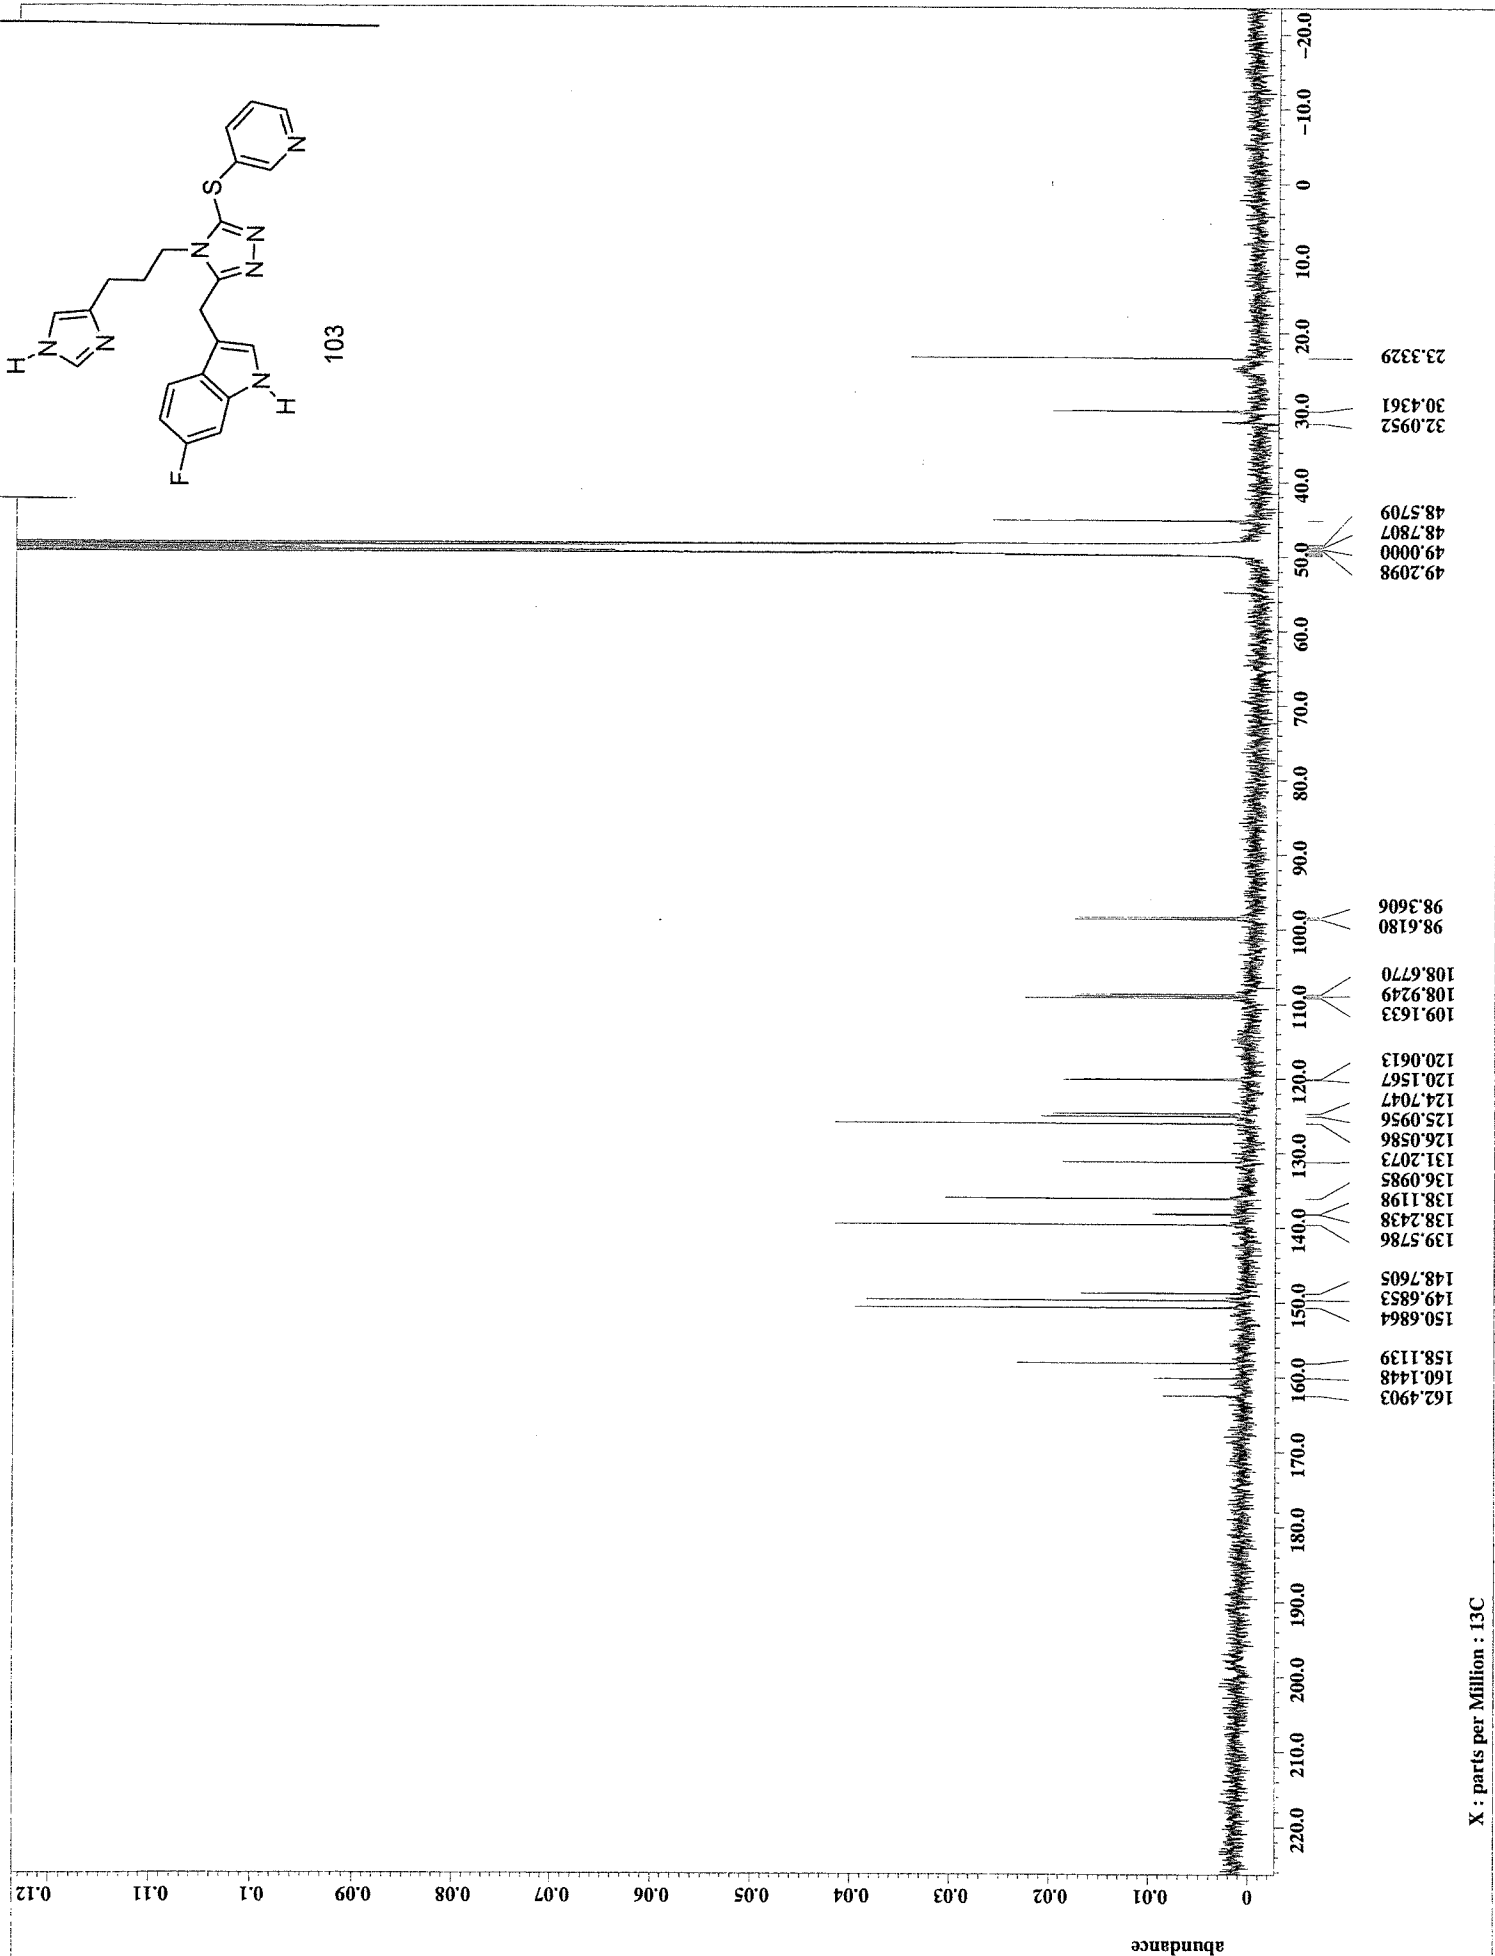

X : parts per Million : 13C



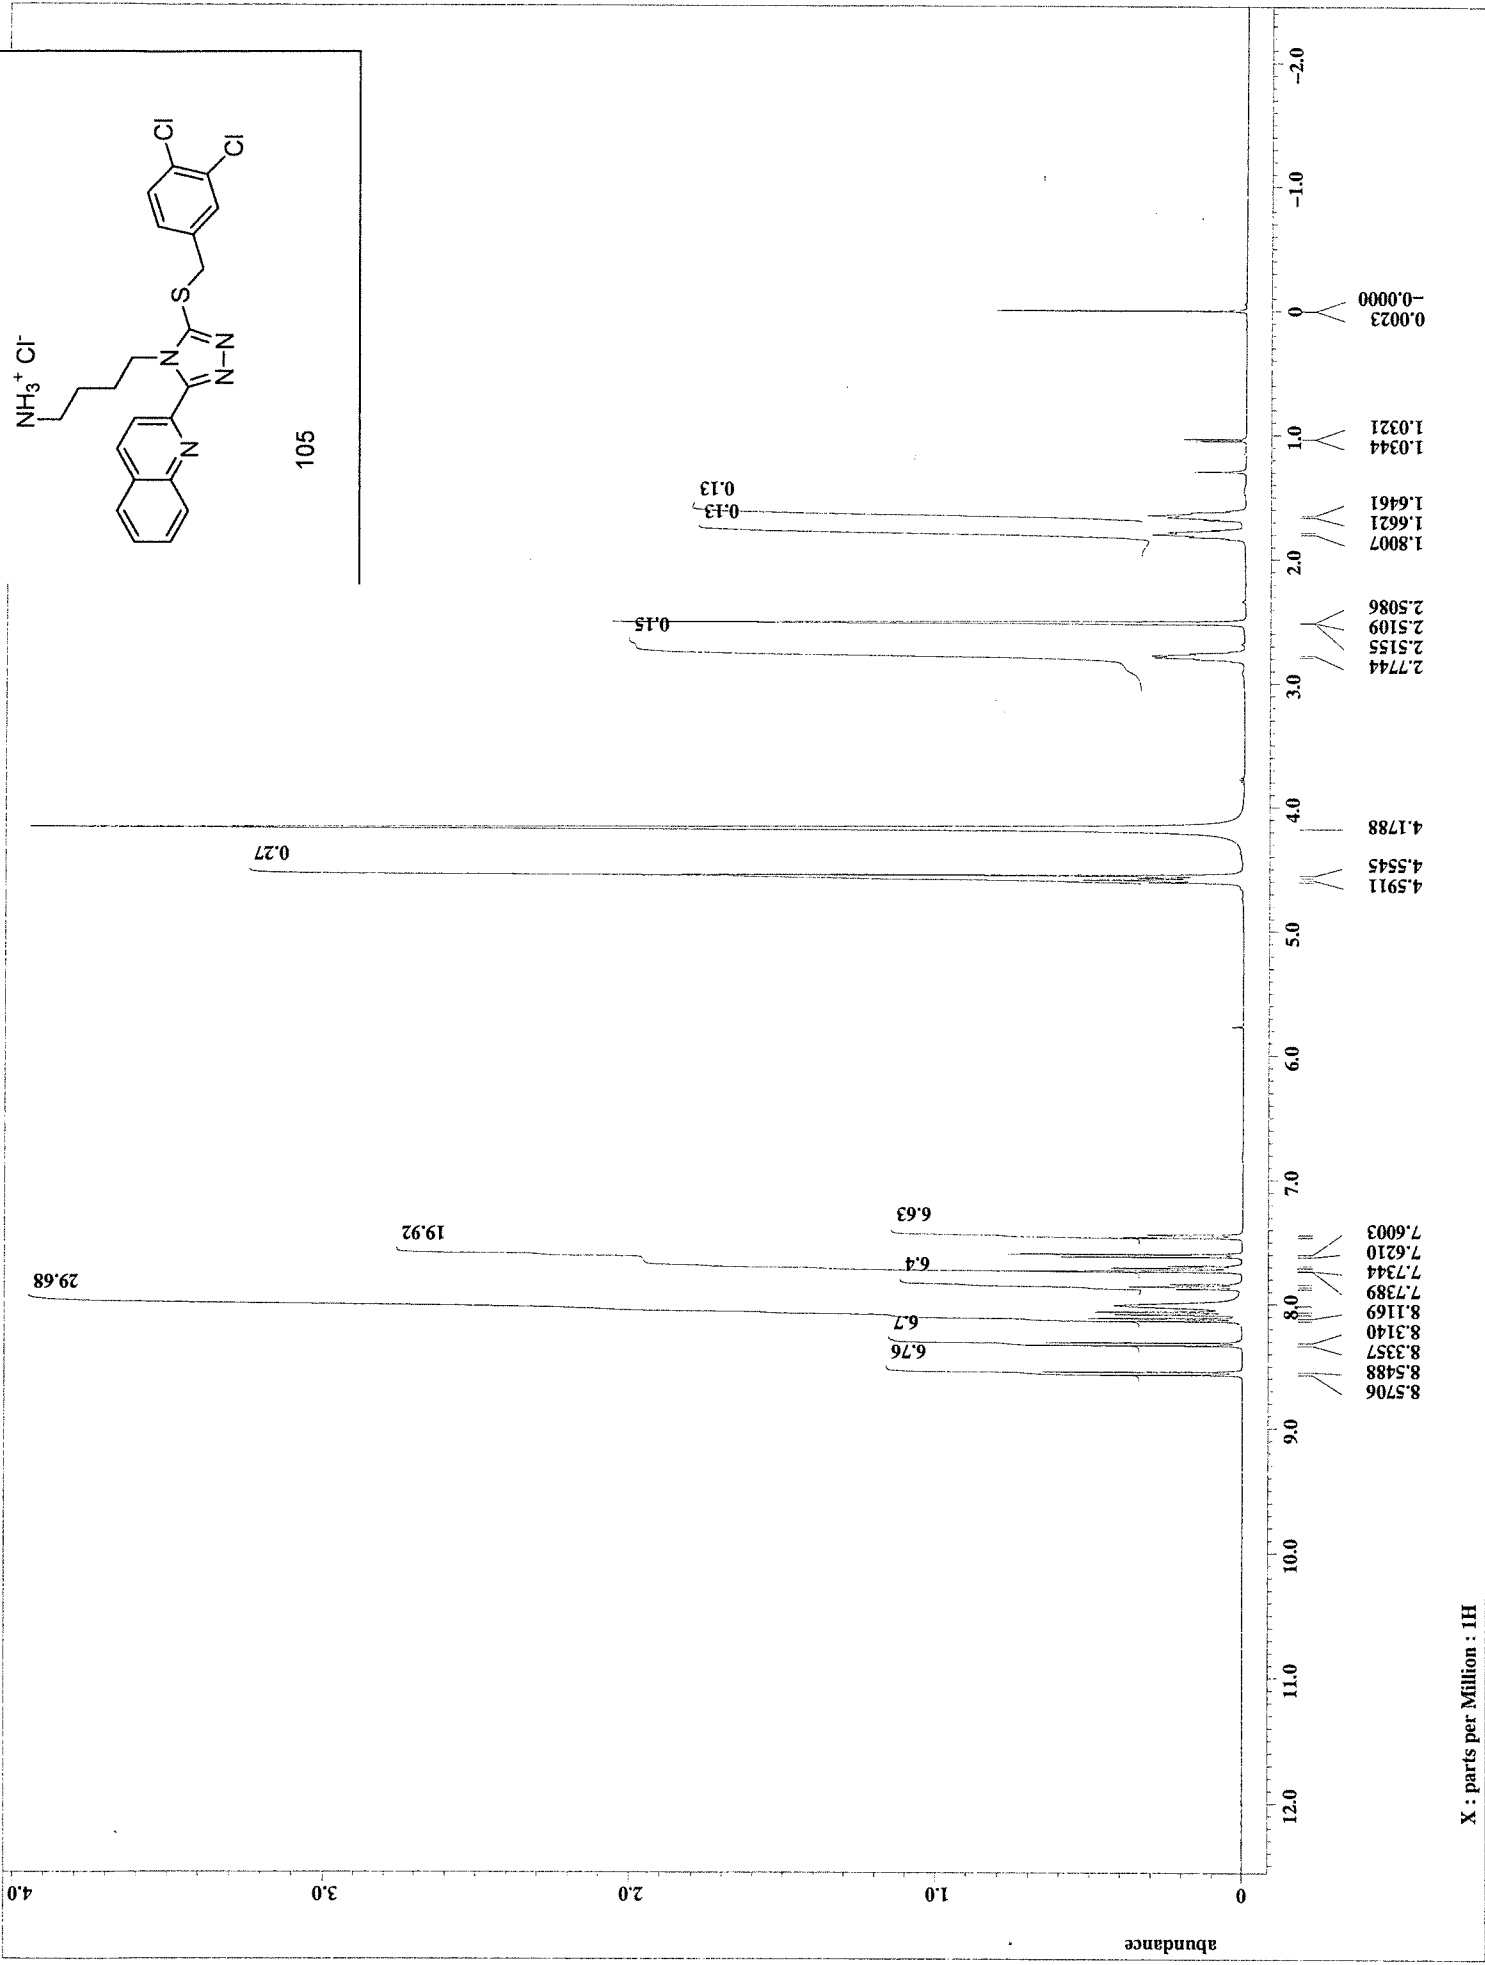

13C NMR

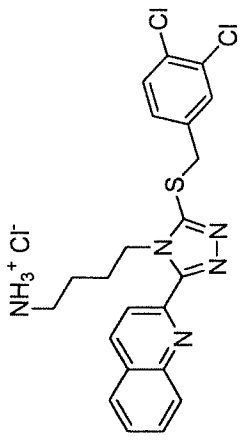

105

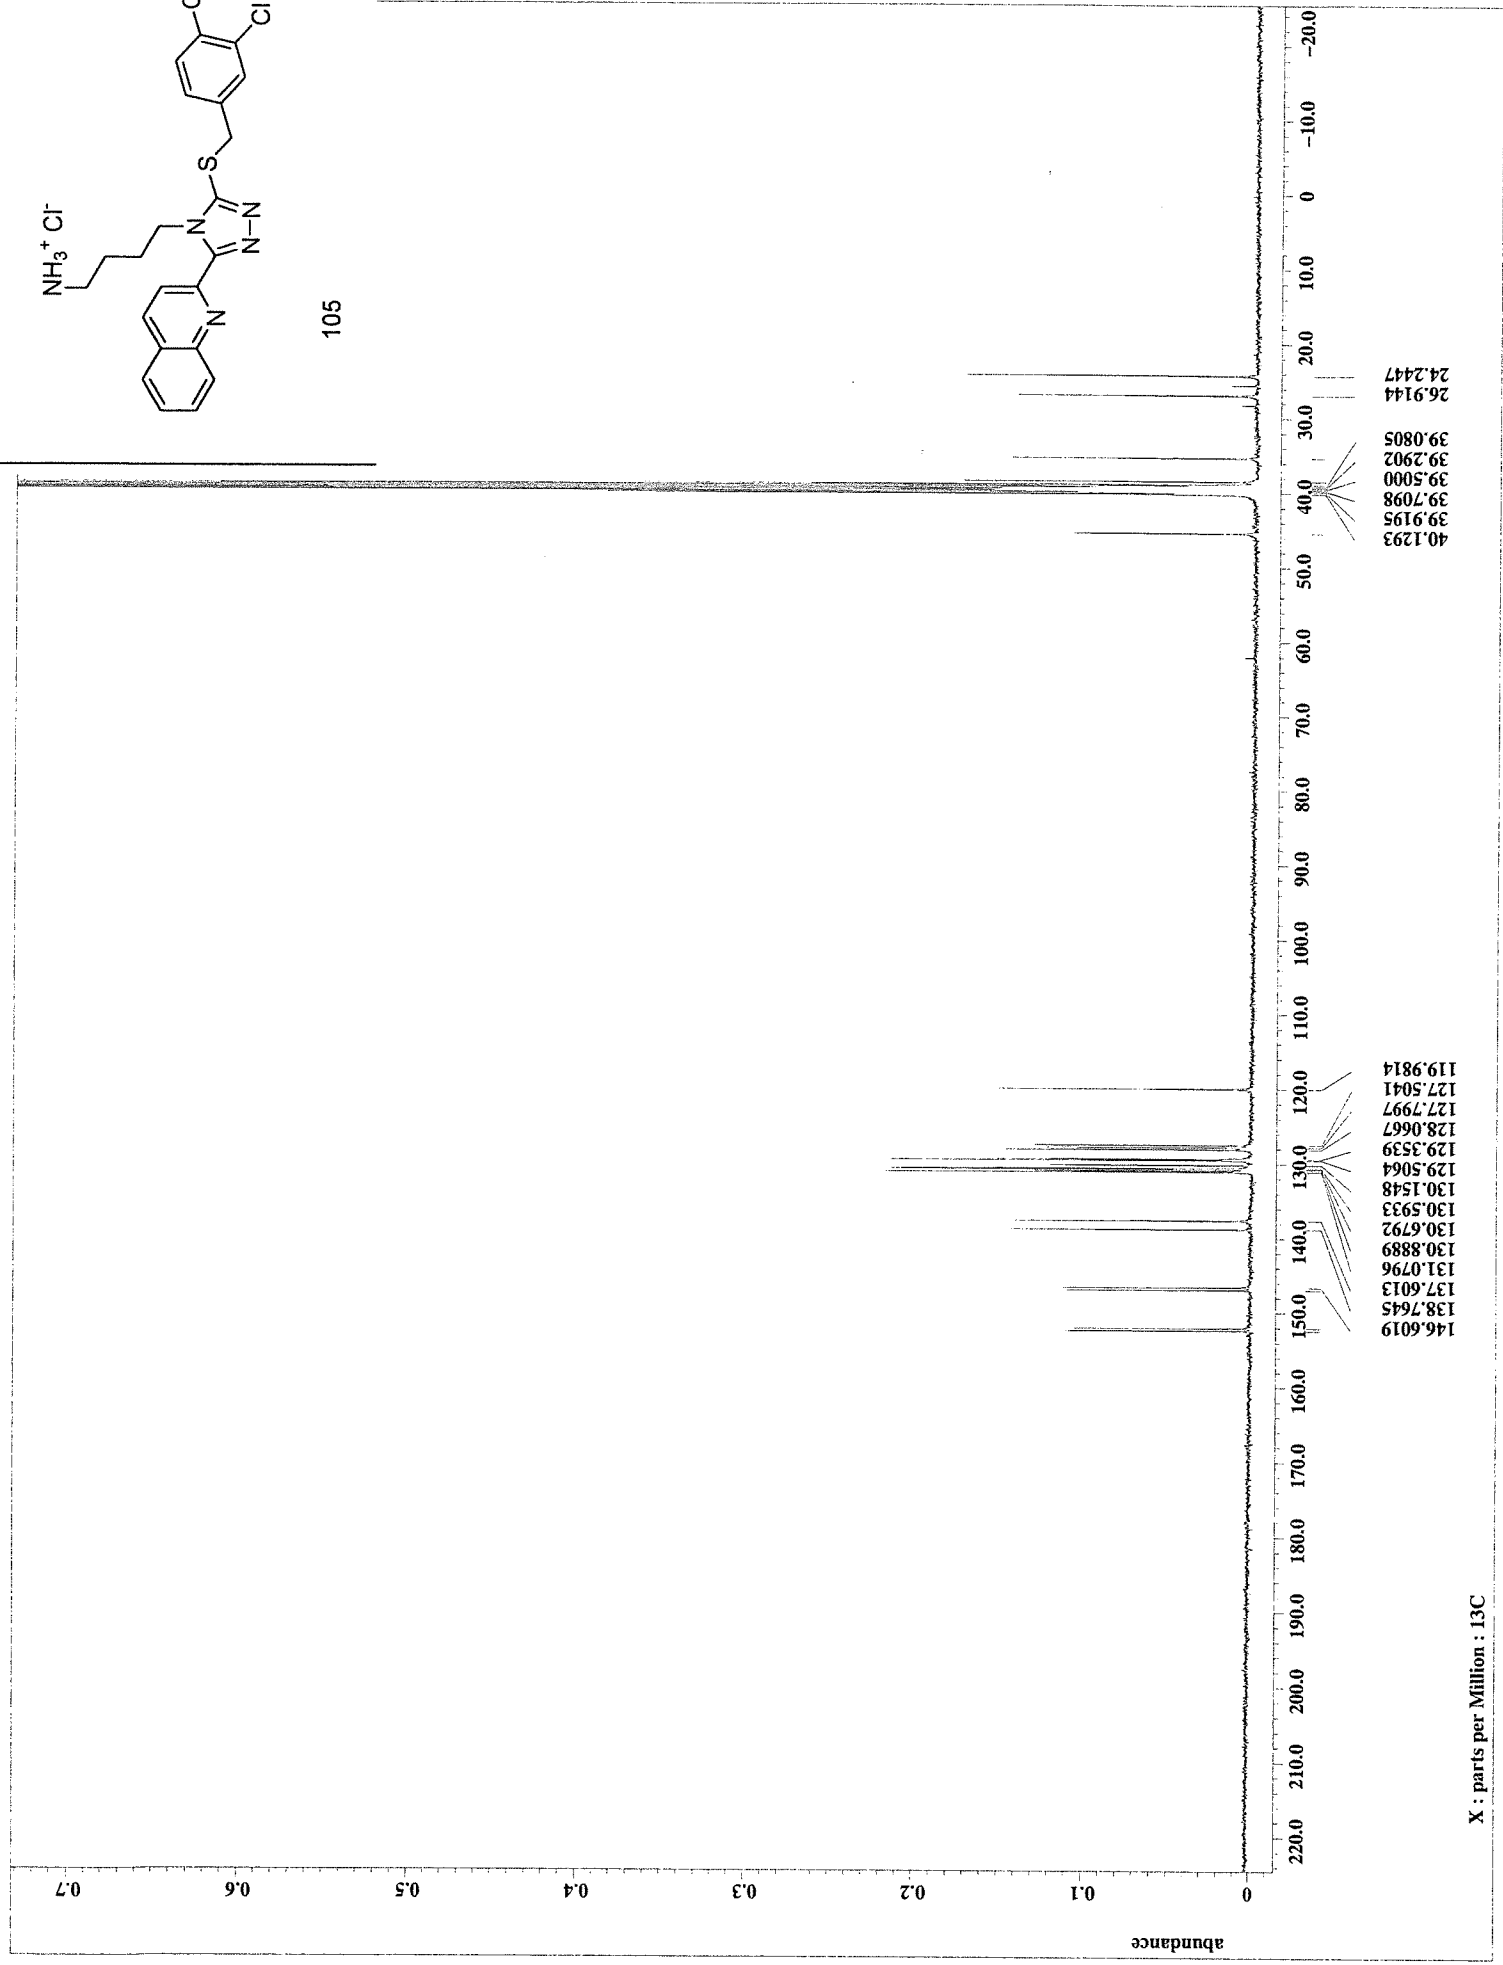

X : parts per Million : 13C

NH<sub>3</sub><sup>+</sup> Cl<sup>-</sup>

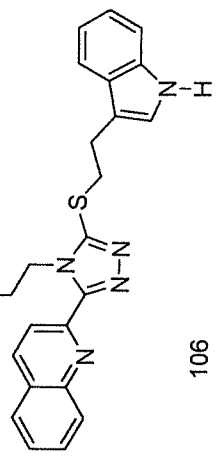

106

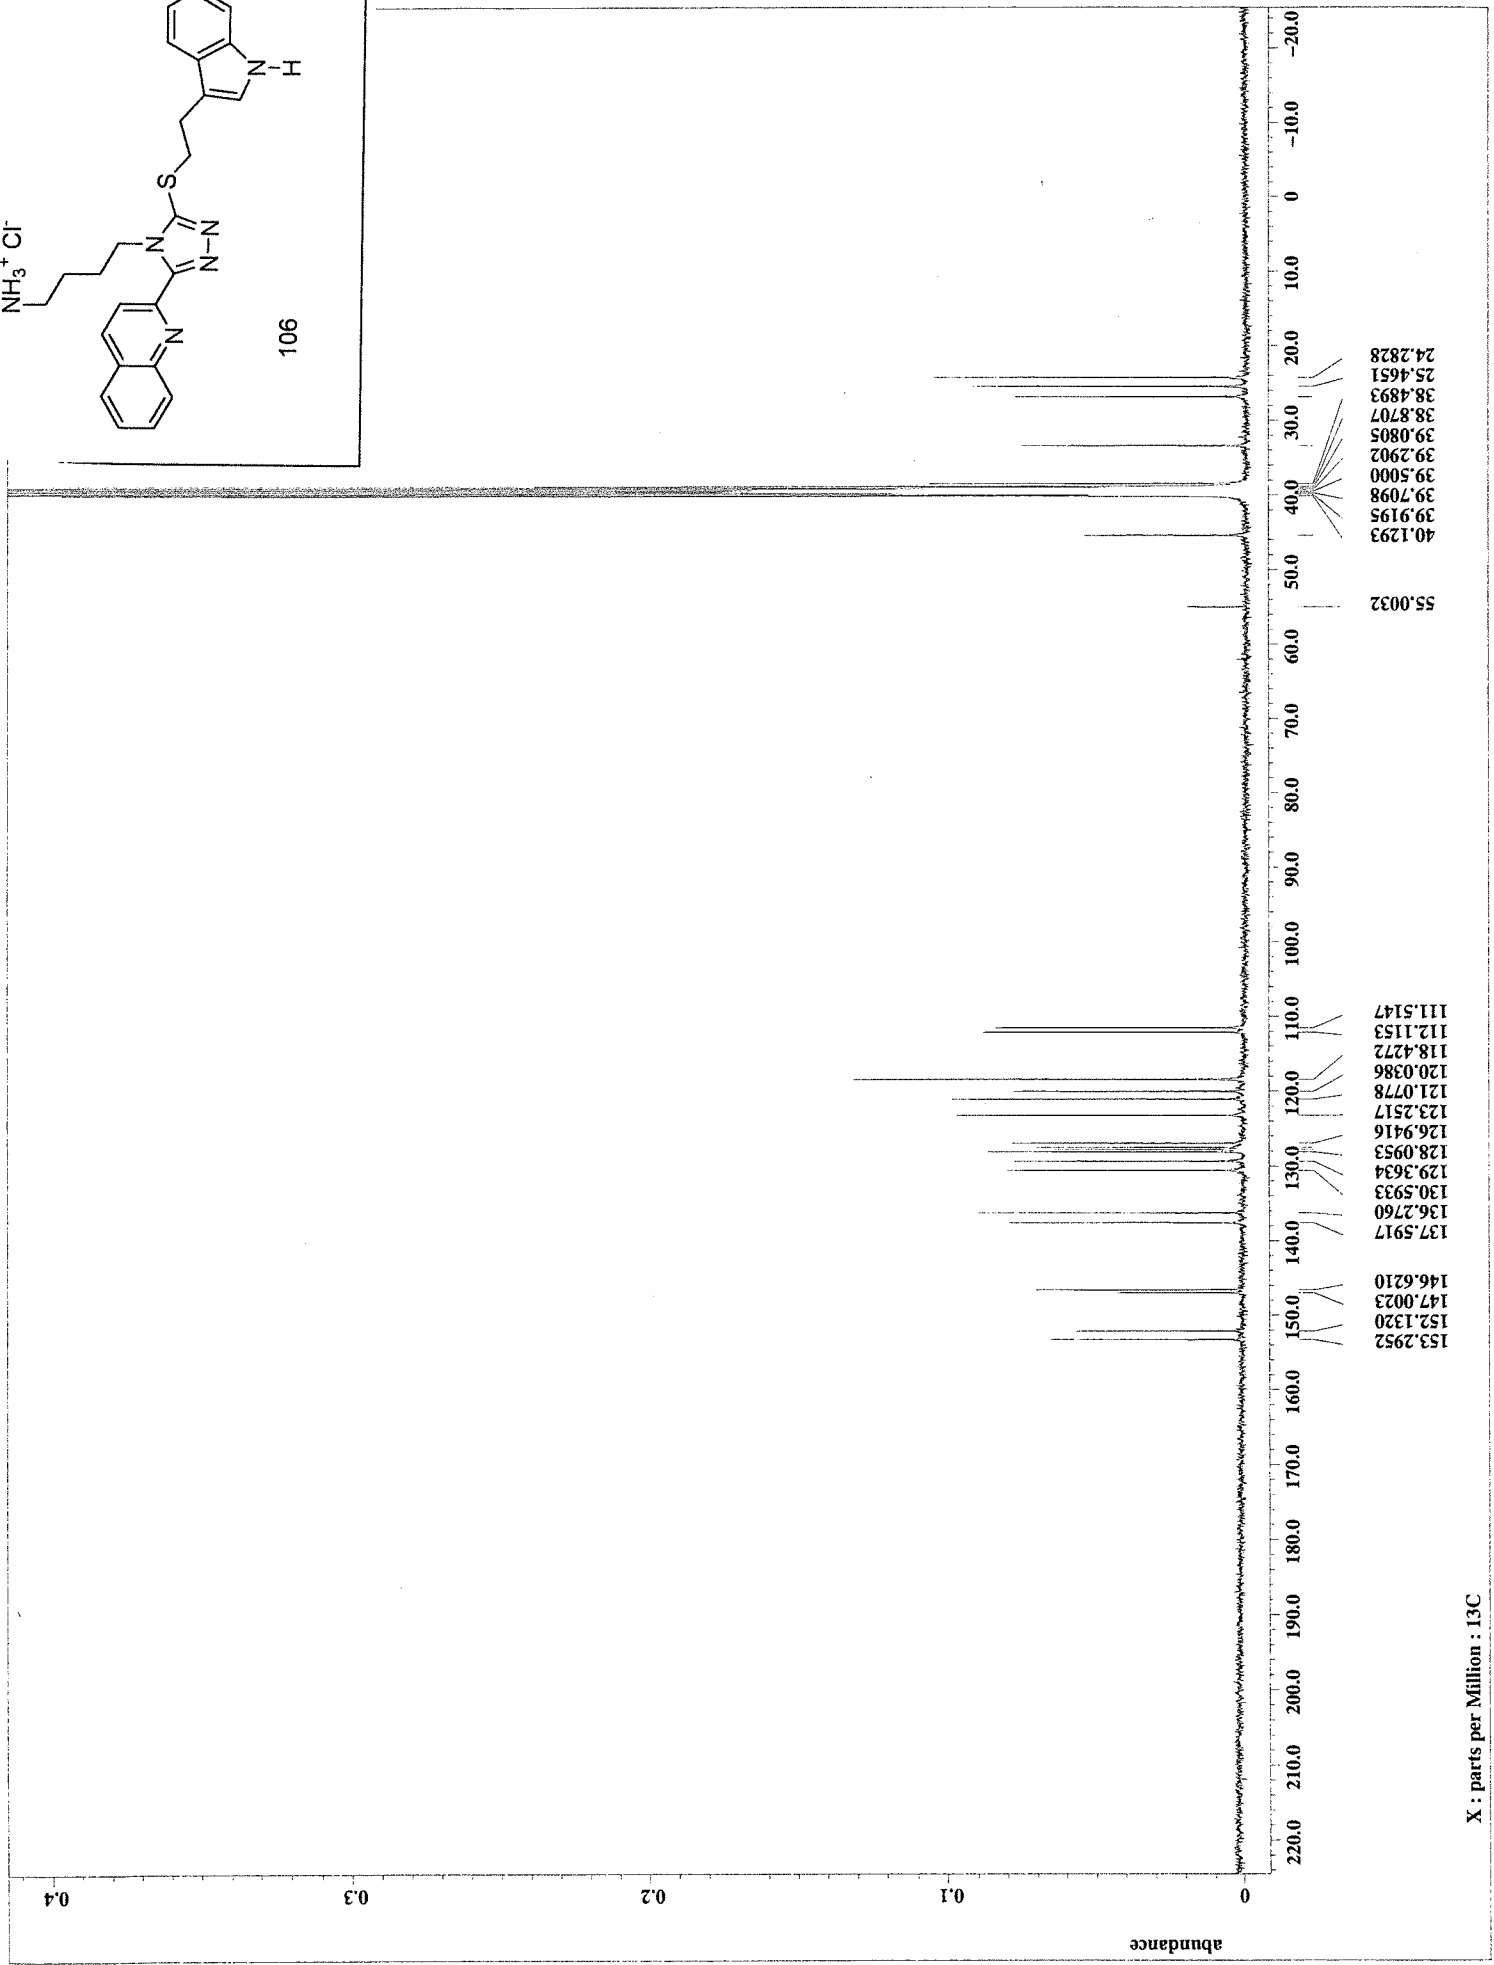

X : parts per Million : 13C

X : parts per Million : 1H

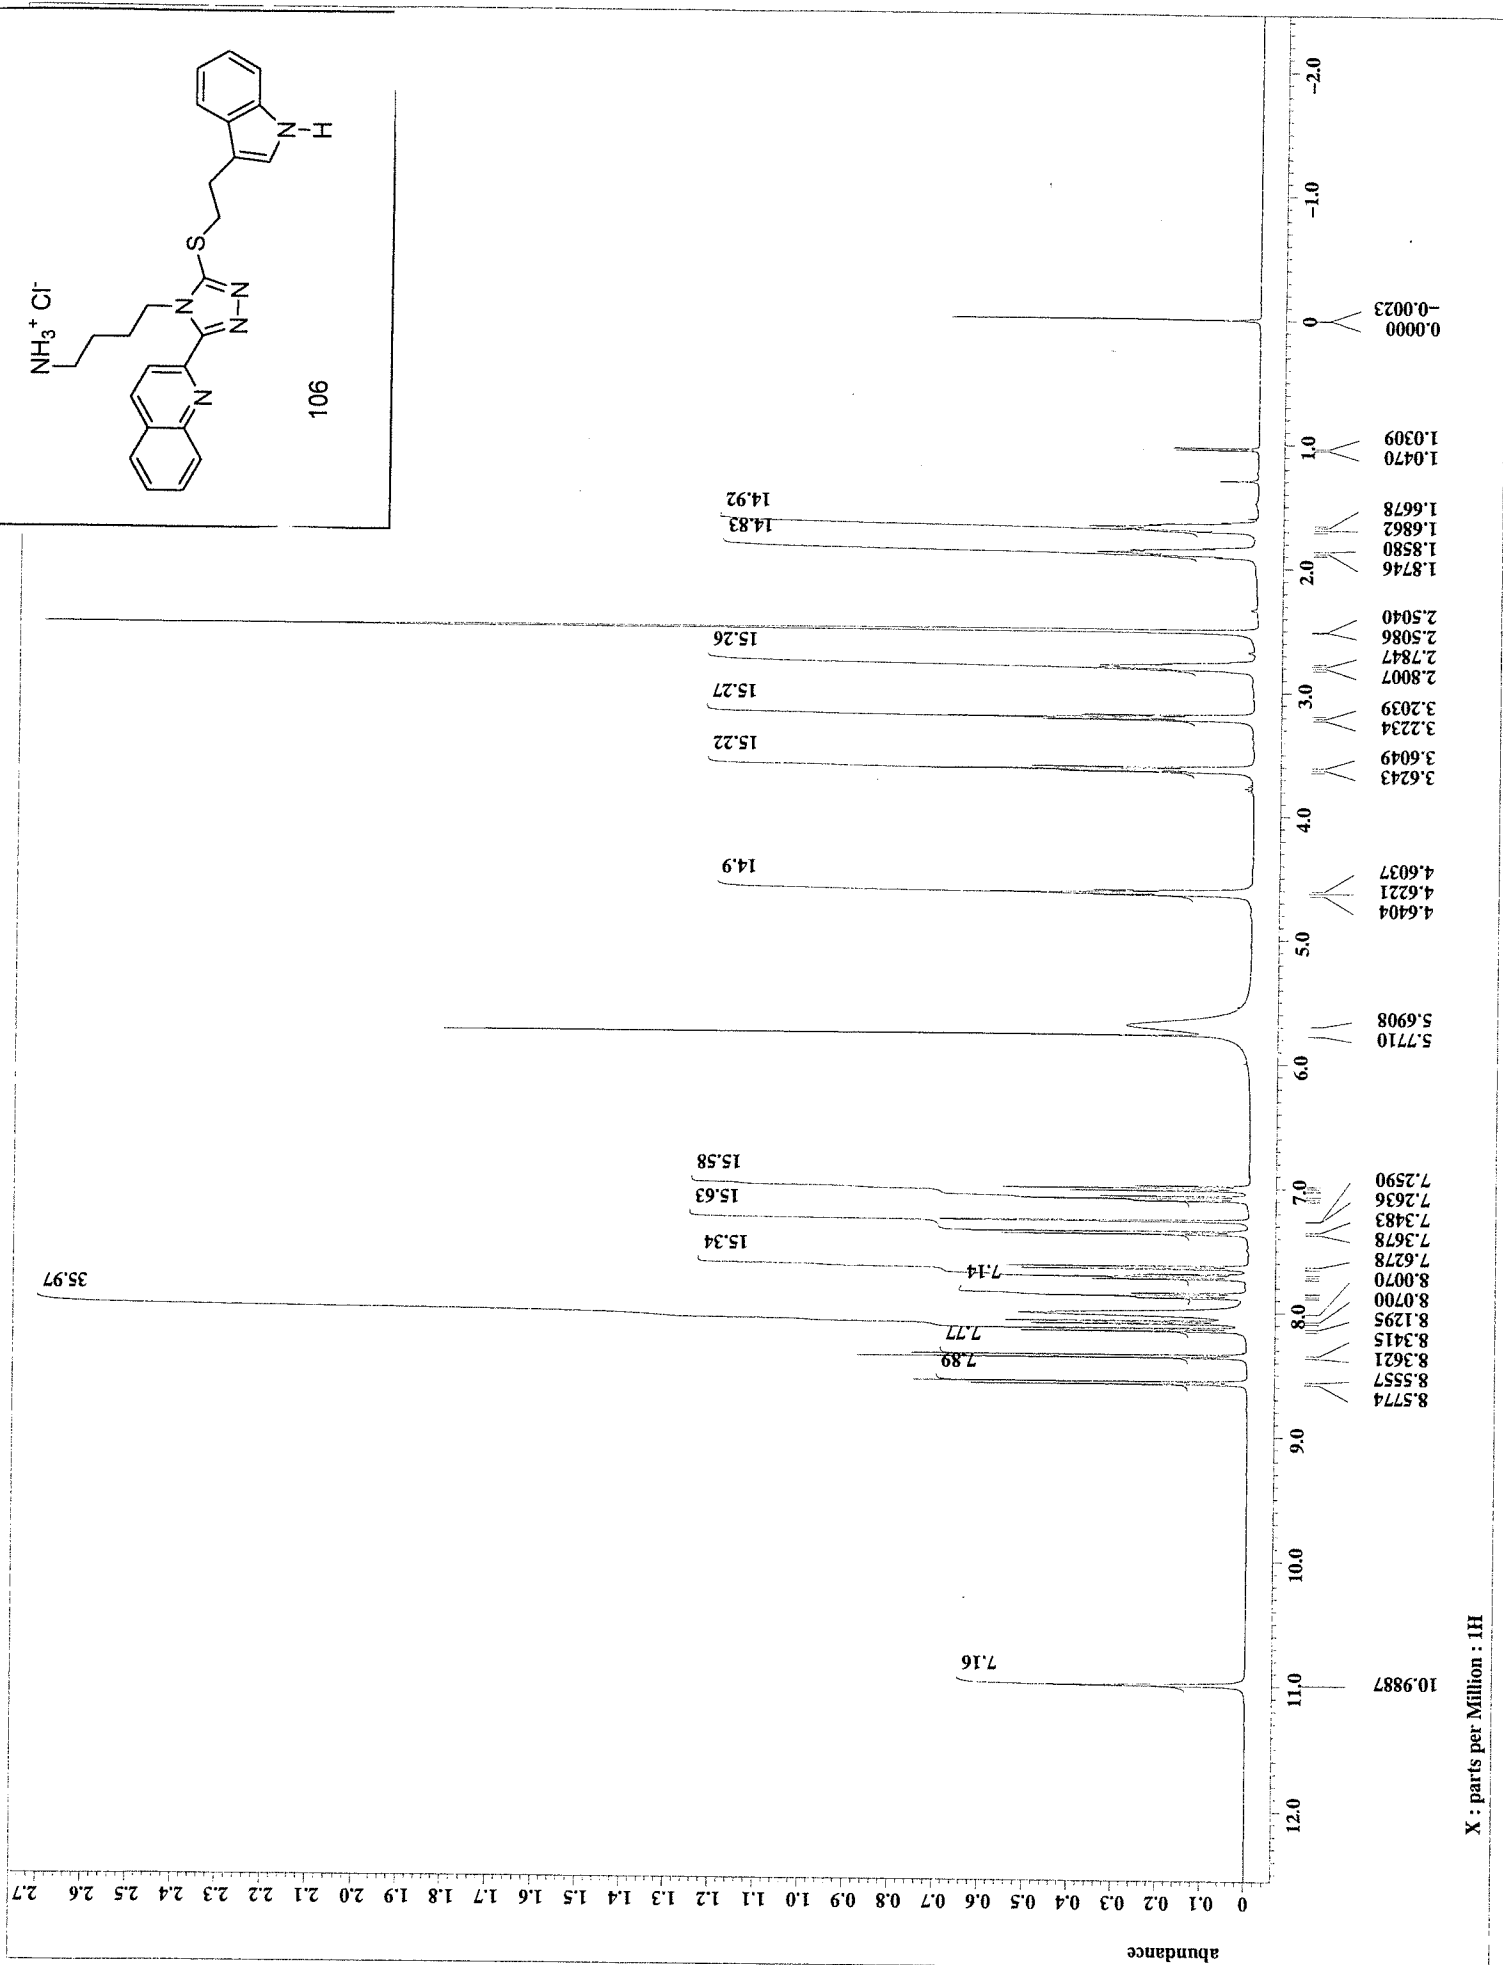

106

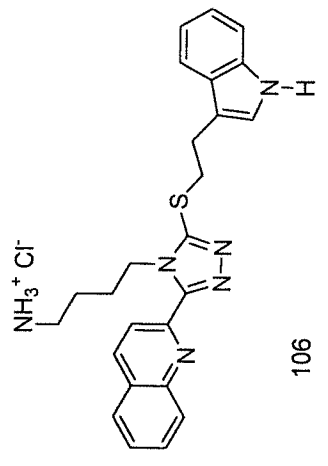

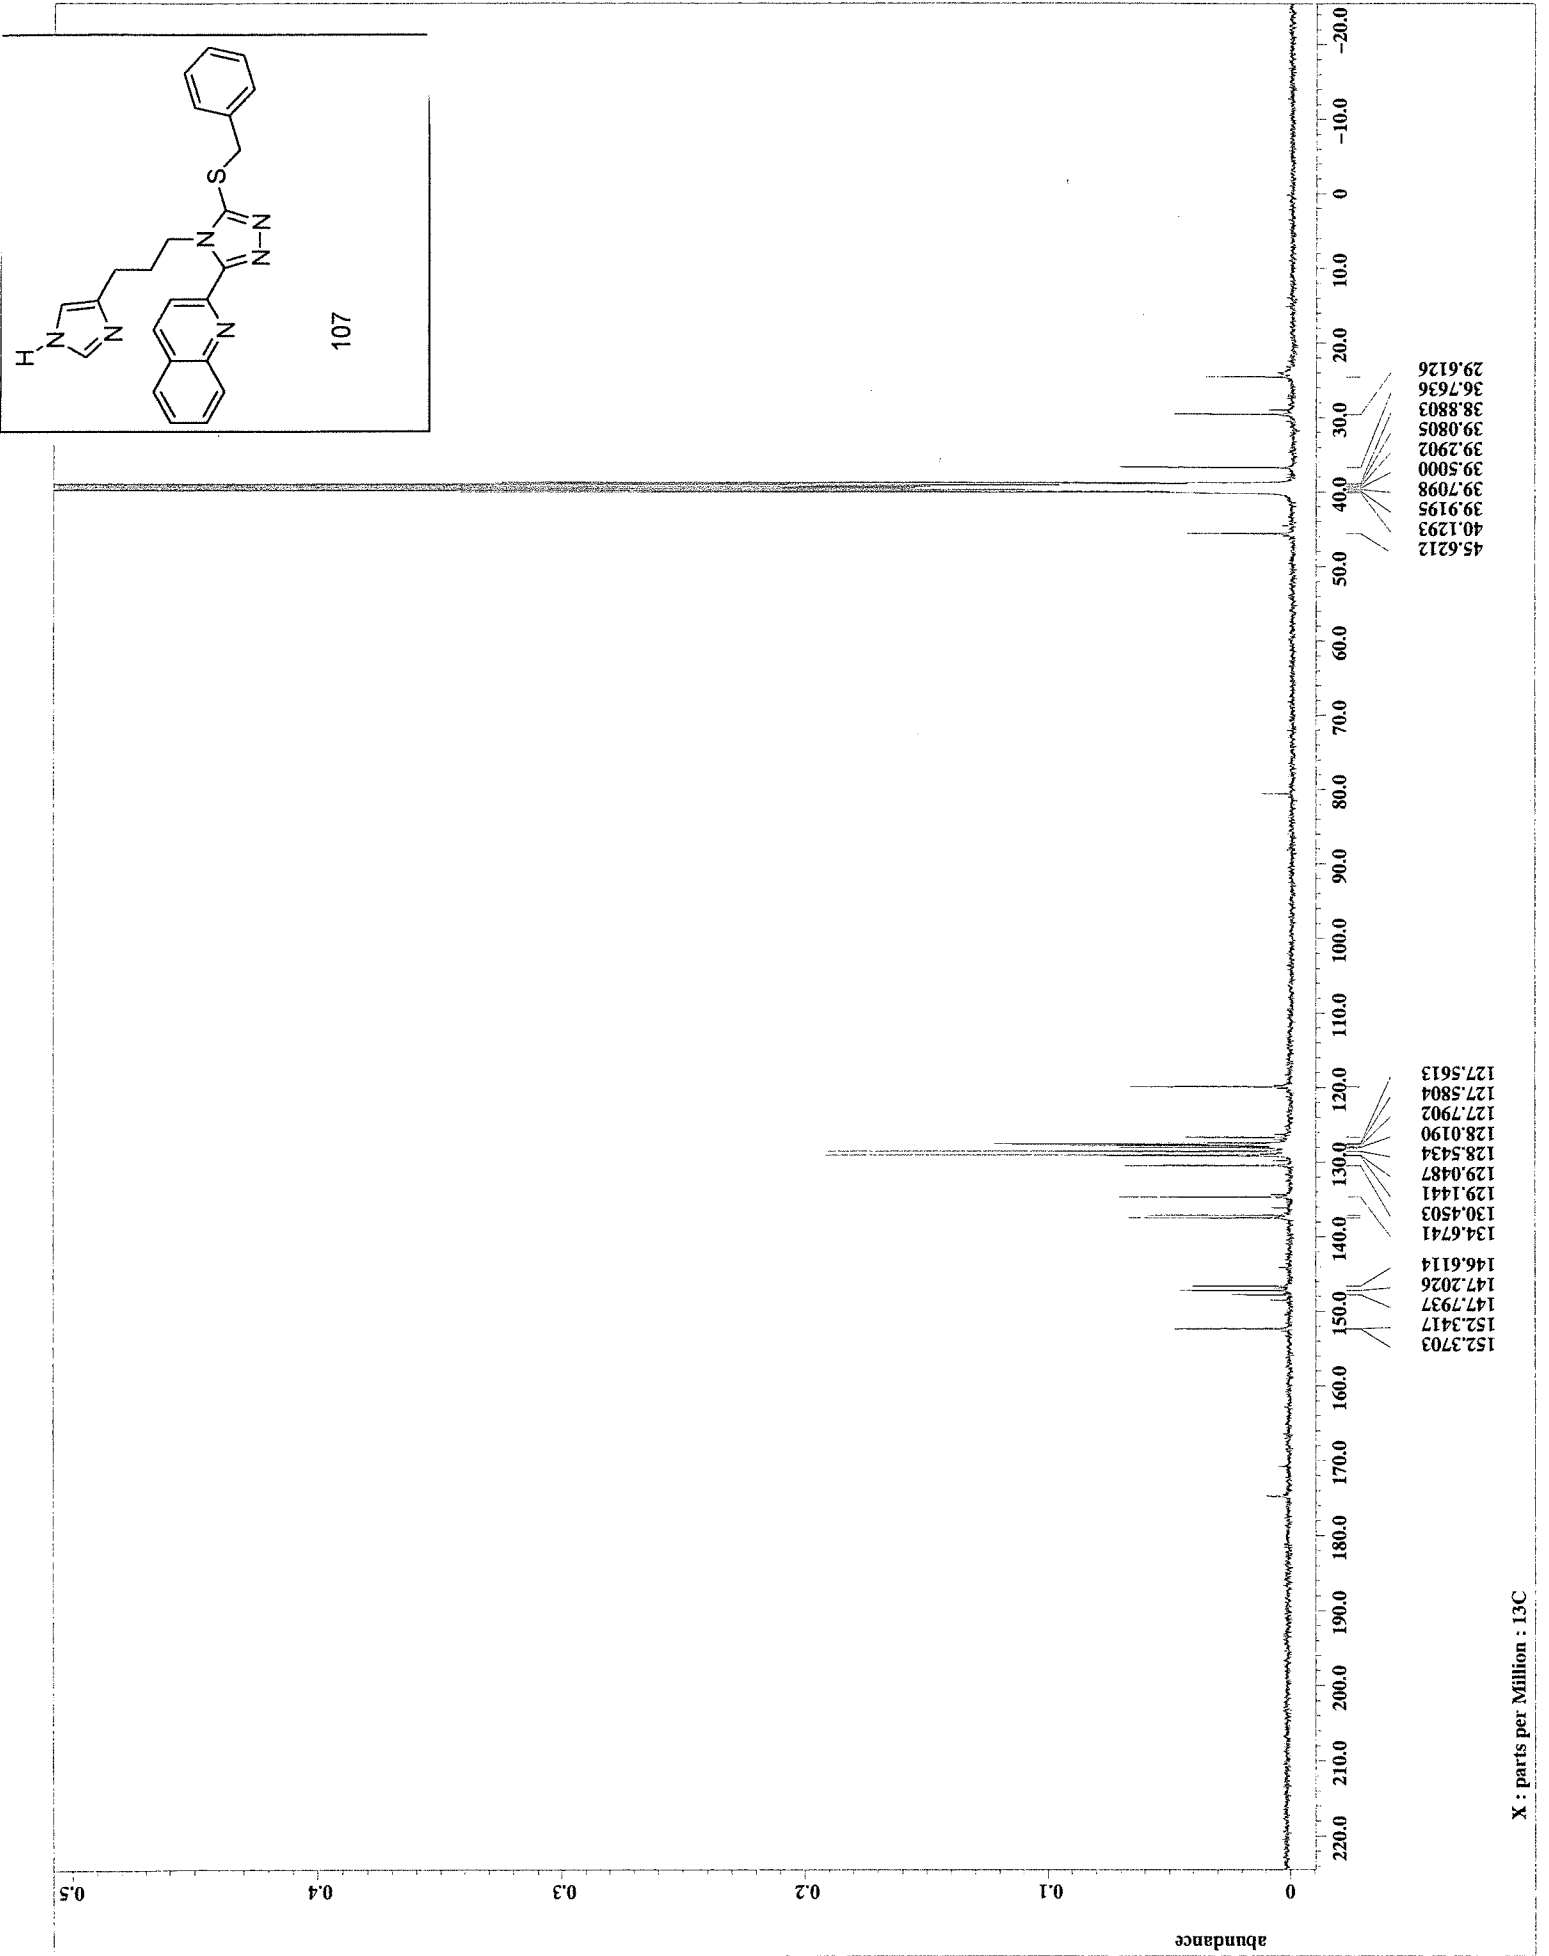

X : parts per Million : 13C

107

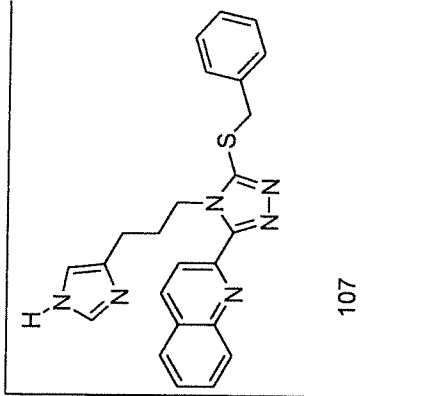

107

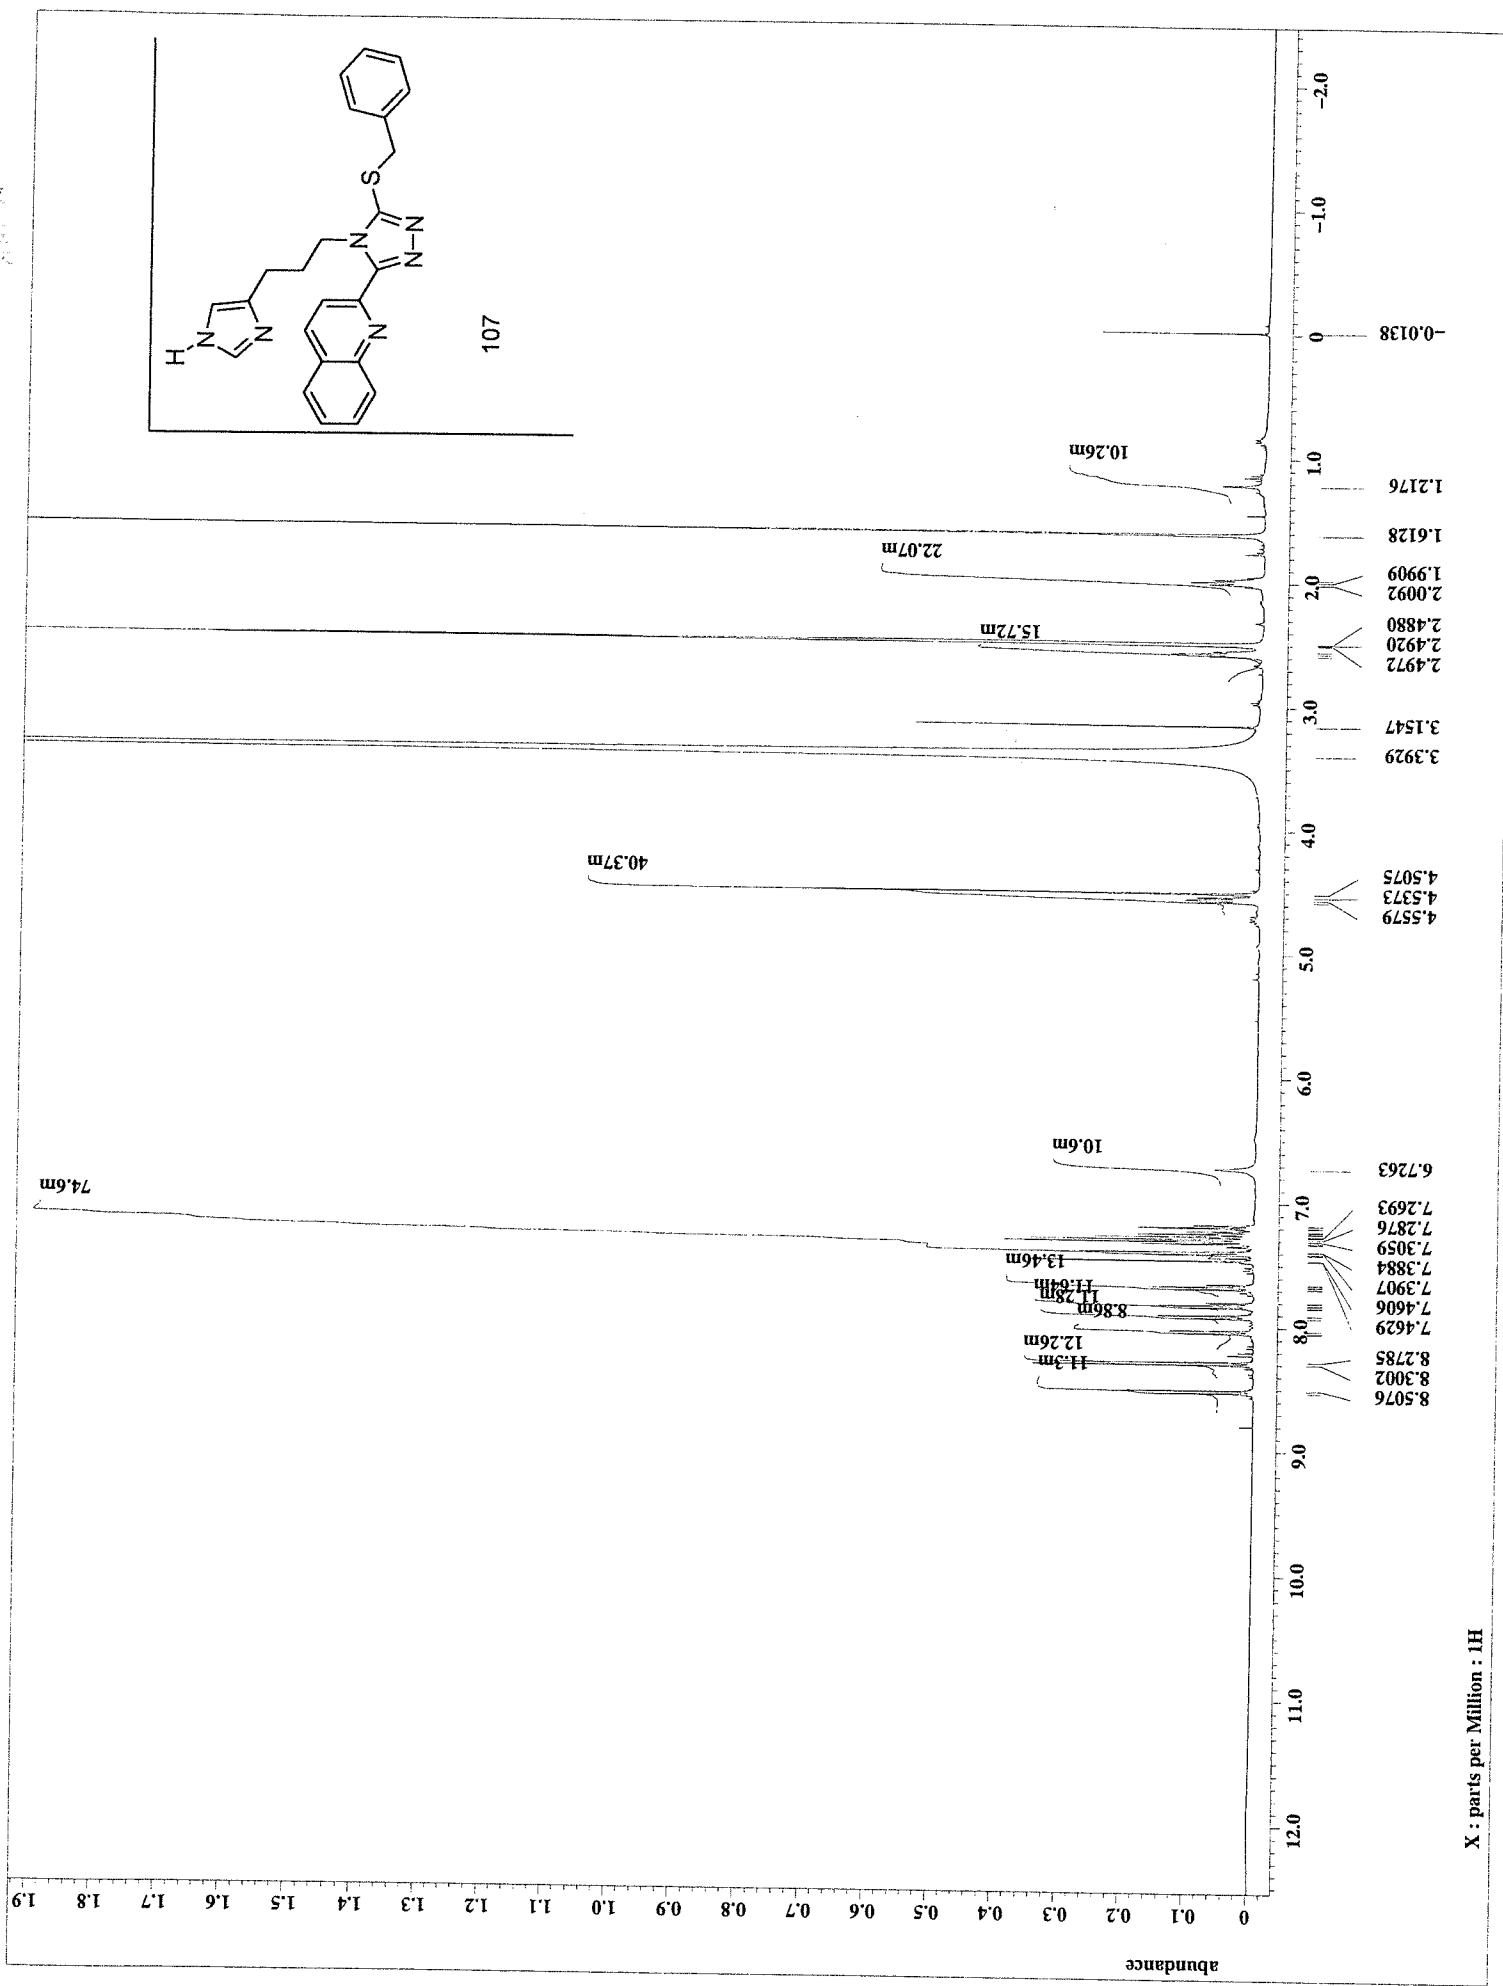

X : parts per Million : 1H

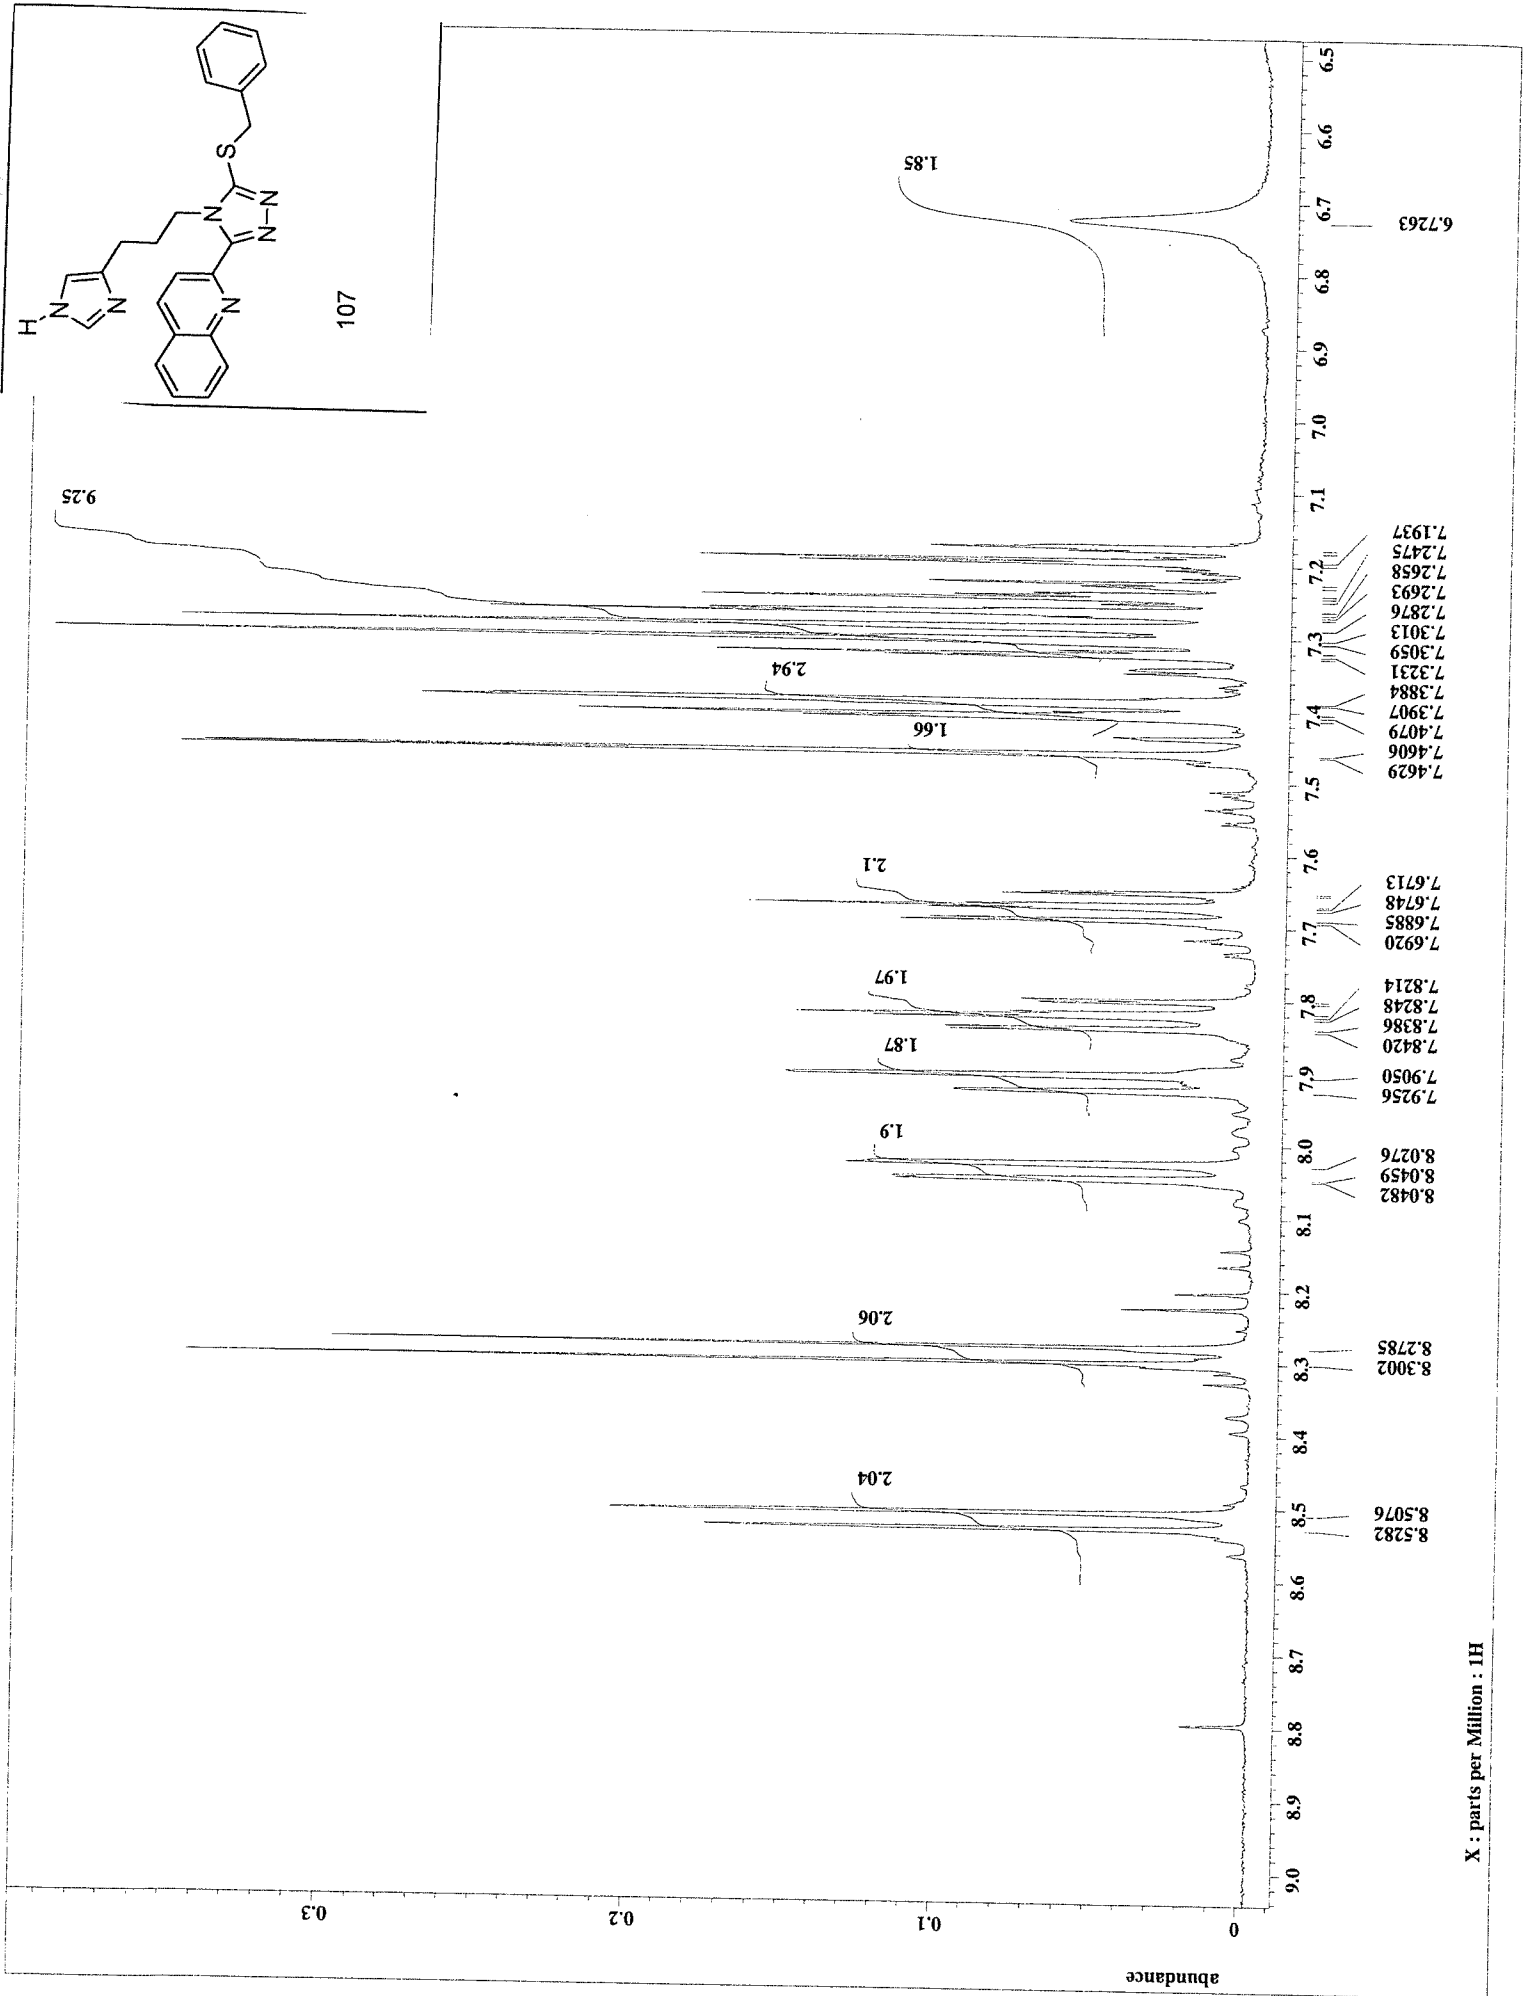

X : parts per Million : 1H

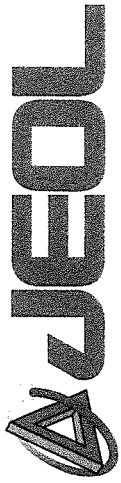

```

= AH.2.160_PROTON-13.jd
= ahospit
= single_pulse.ex2
= AH.2.160
= DMSO-D6
= 18-APR-2017 15:41:00
= 18-JUL-2024 10:21:32
= 18-JUL-2024 10:21:41
= 1D COMPLEX
= 13107
= 1H
= [ppm]
= X
= ECS 400
= JNM-ECS400
= 9.389766[T] (400[MHz])
= 2.18365952[s]
= 1H
= 399.78219838[MHz]
= 5[ppm]
= 16384
= 1
= 0.45794685[Hz]
= 7.5030012[kHz]
= 1H
= 399.78219838[MHz]
= 5[ppm]
= 1H
= 399.78219838[MHz]
= 5[ppm]
= FALSE
= 1
= 16
= 10.68[us]
= 2.18365952[s]
= 45[deg]
= 6[db]
= 5.34[us]
= Off
= Off
= FALSE
= Dante presat
= Initial wait
= 1[s]
= 48
= 4[s]
= 6.18365952[s]
= 460.0[dC]

```

```

File name
Author
Experiment
Sample_id
Solvent
Creation_time
Revision_time
B[Current_time]
Data_format
Dim_size
Dim_title
Dim_units
Dimensions
Site
Spectrometer

```

```

Field_strength
X_acq_duration
X_domain
X_freq
X_offset
X_points
X_prescans
X_resolution
X_sweep
Irr_domain
Irr_freq
Irr_offset
Tri_domain
Tri_freq
Tri_offset
Clipped
Mod_return
Scans
Total_scans
X_90_width
X_acq_time
X_angle
X_atn
X_pulse
Irr_mode
Tri_mode
Dante_presat
Initial_wait
Recvr_gain
Relaxation_delay
Repetition_time
Temp_get

```

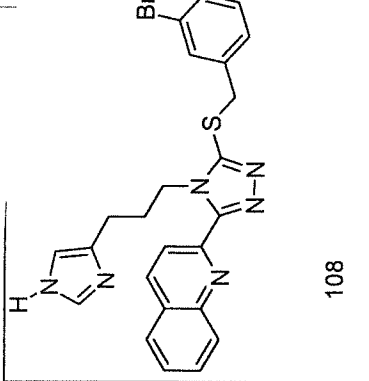

108

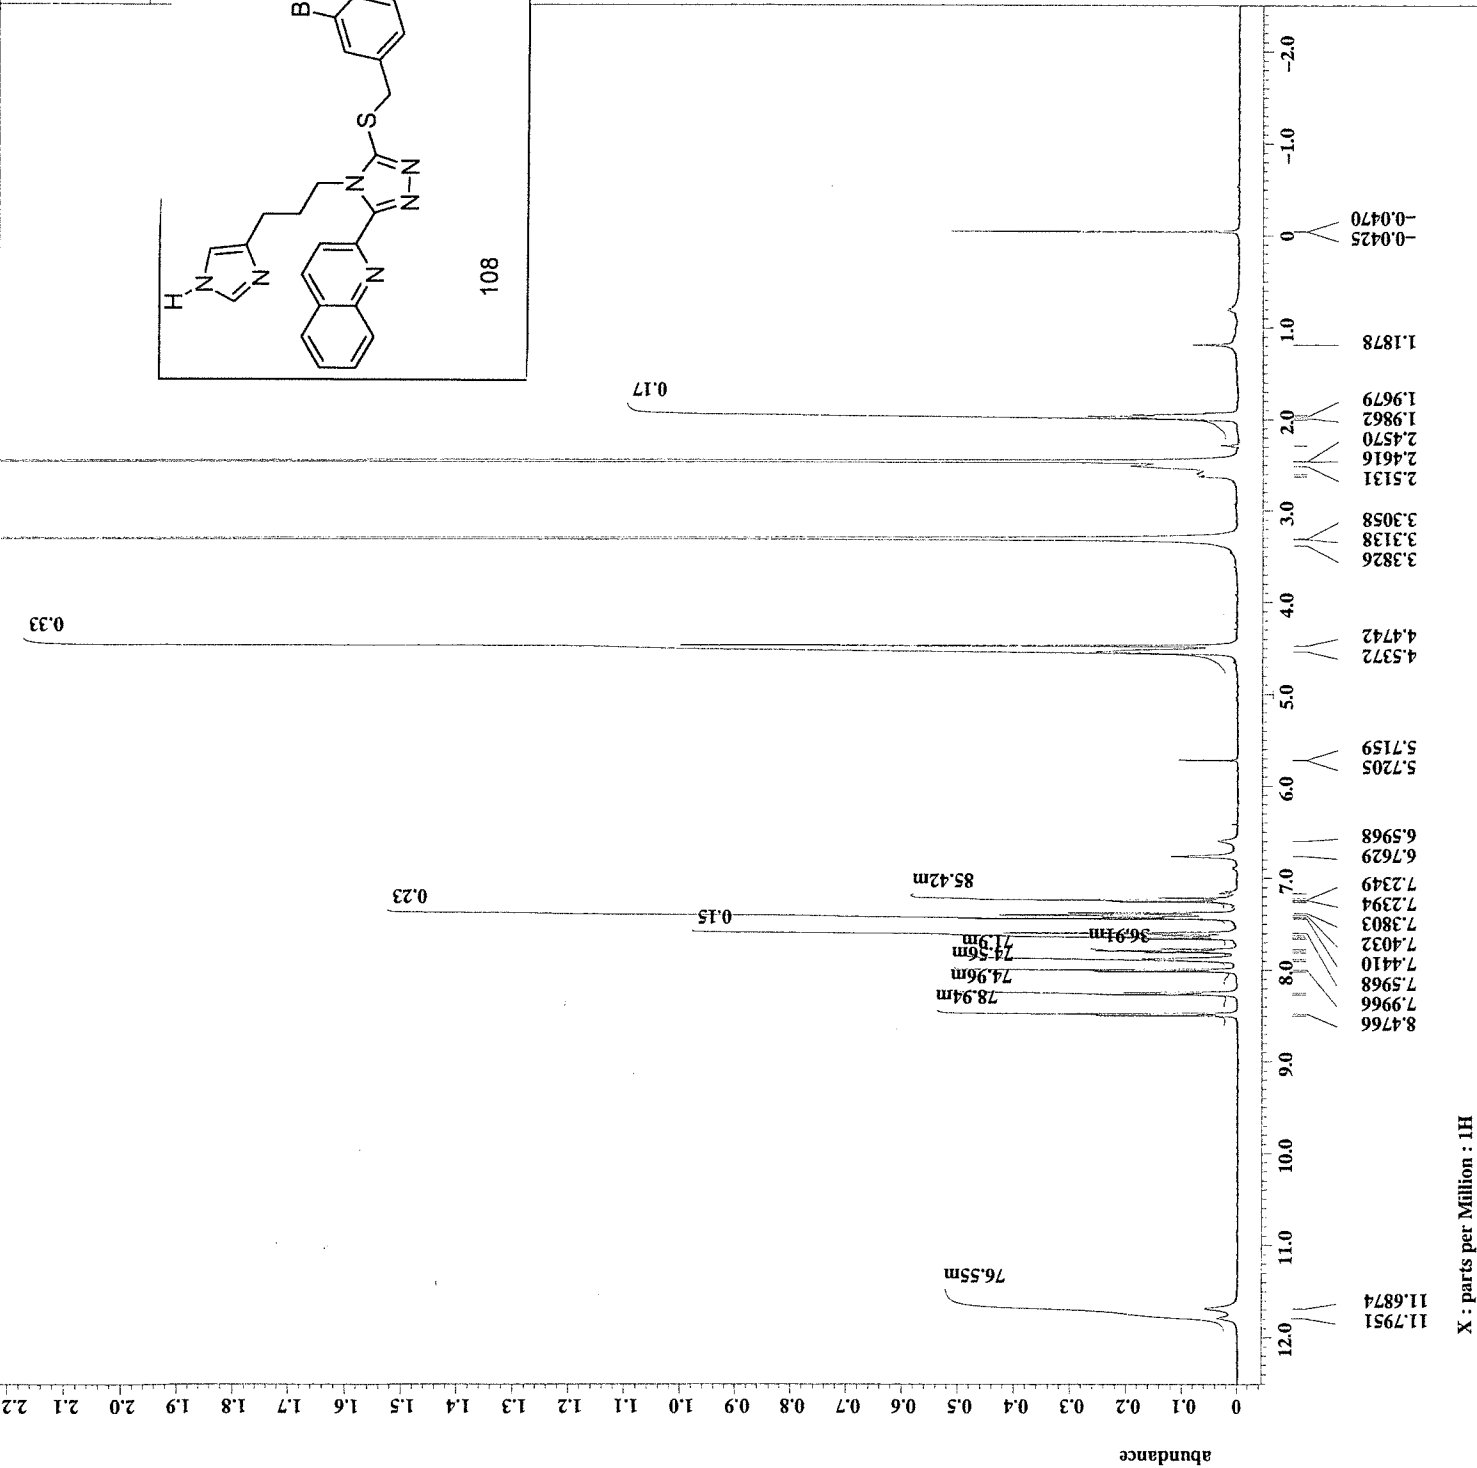

X : parts per Million : 1H



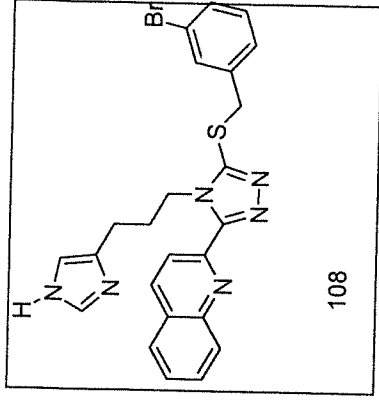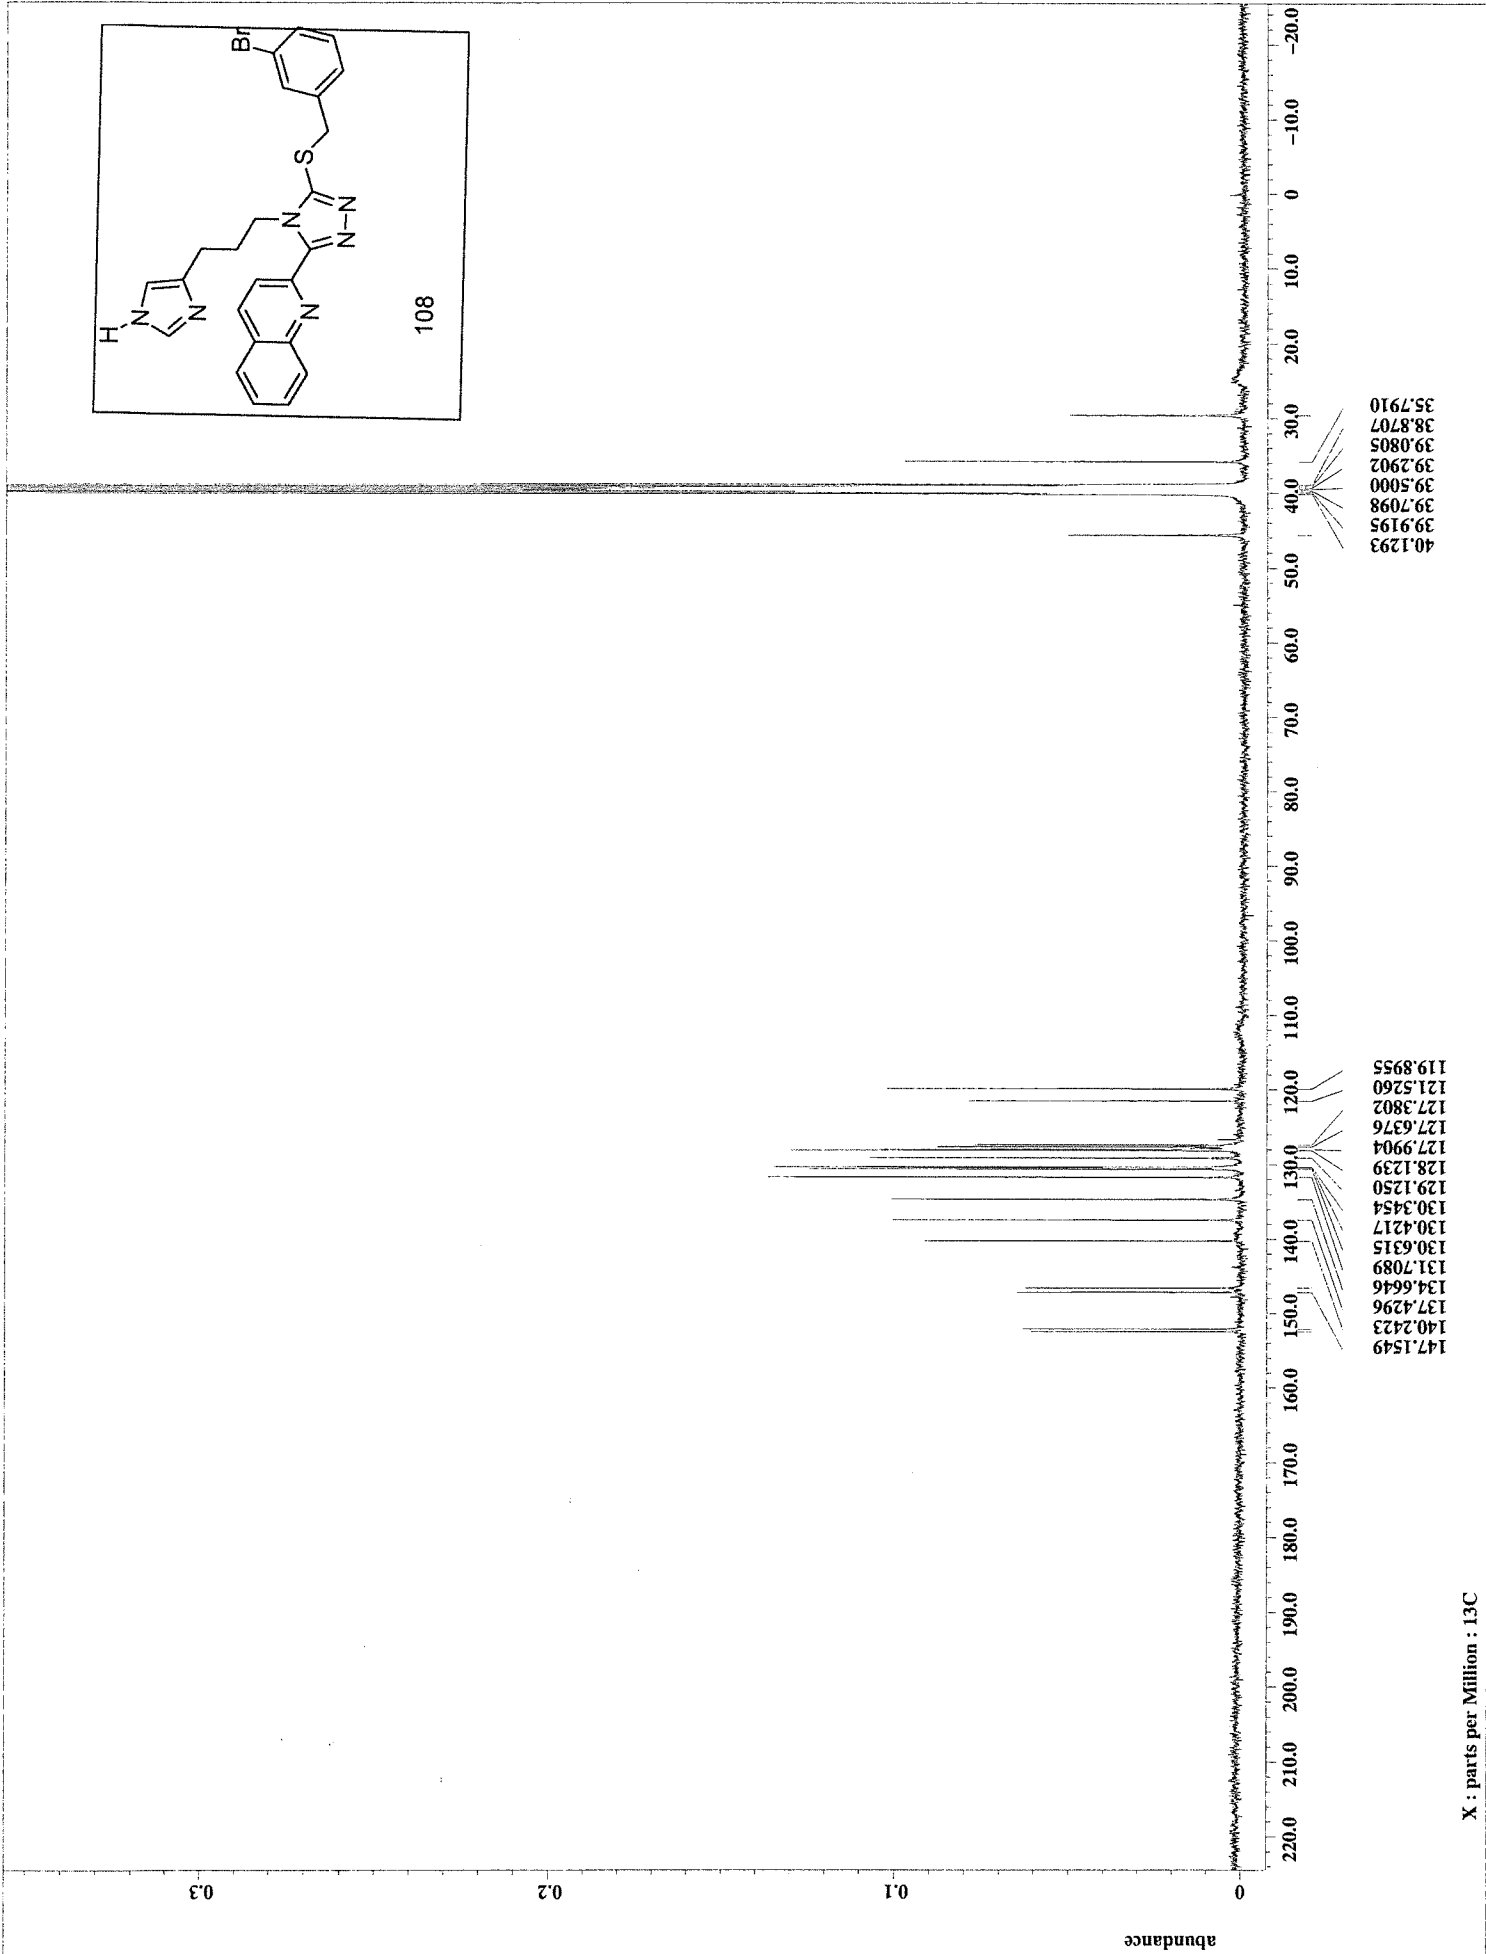

ANALYSIS

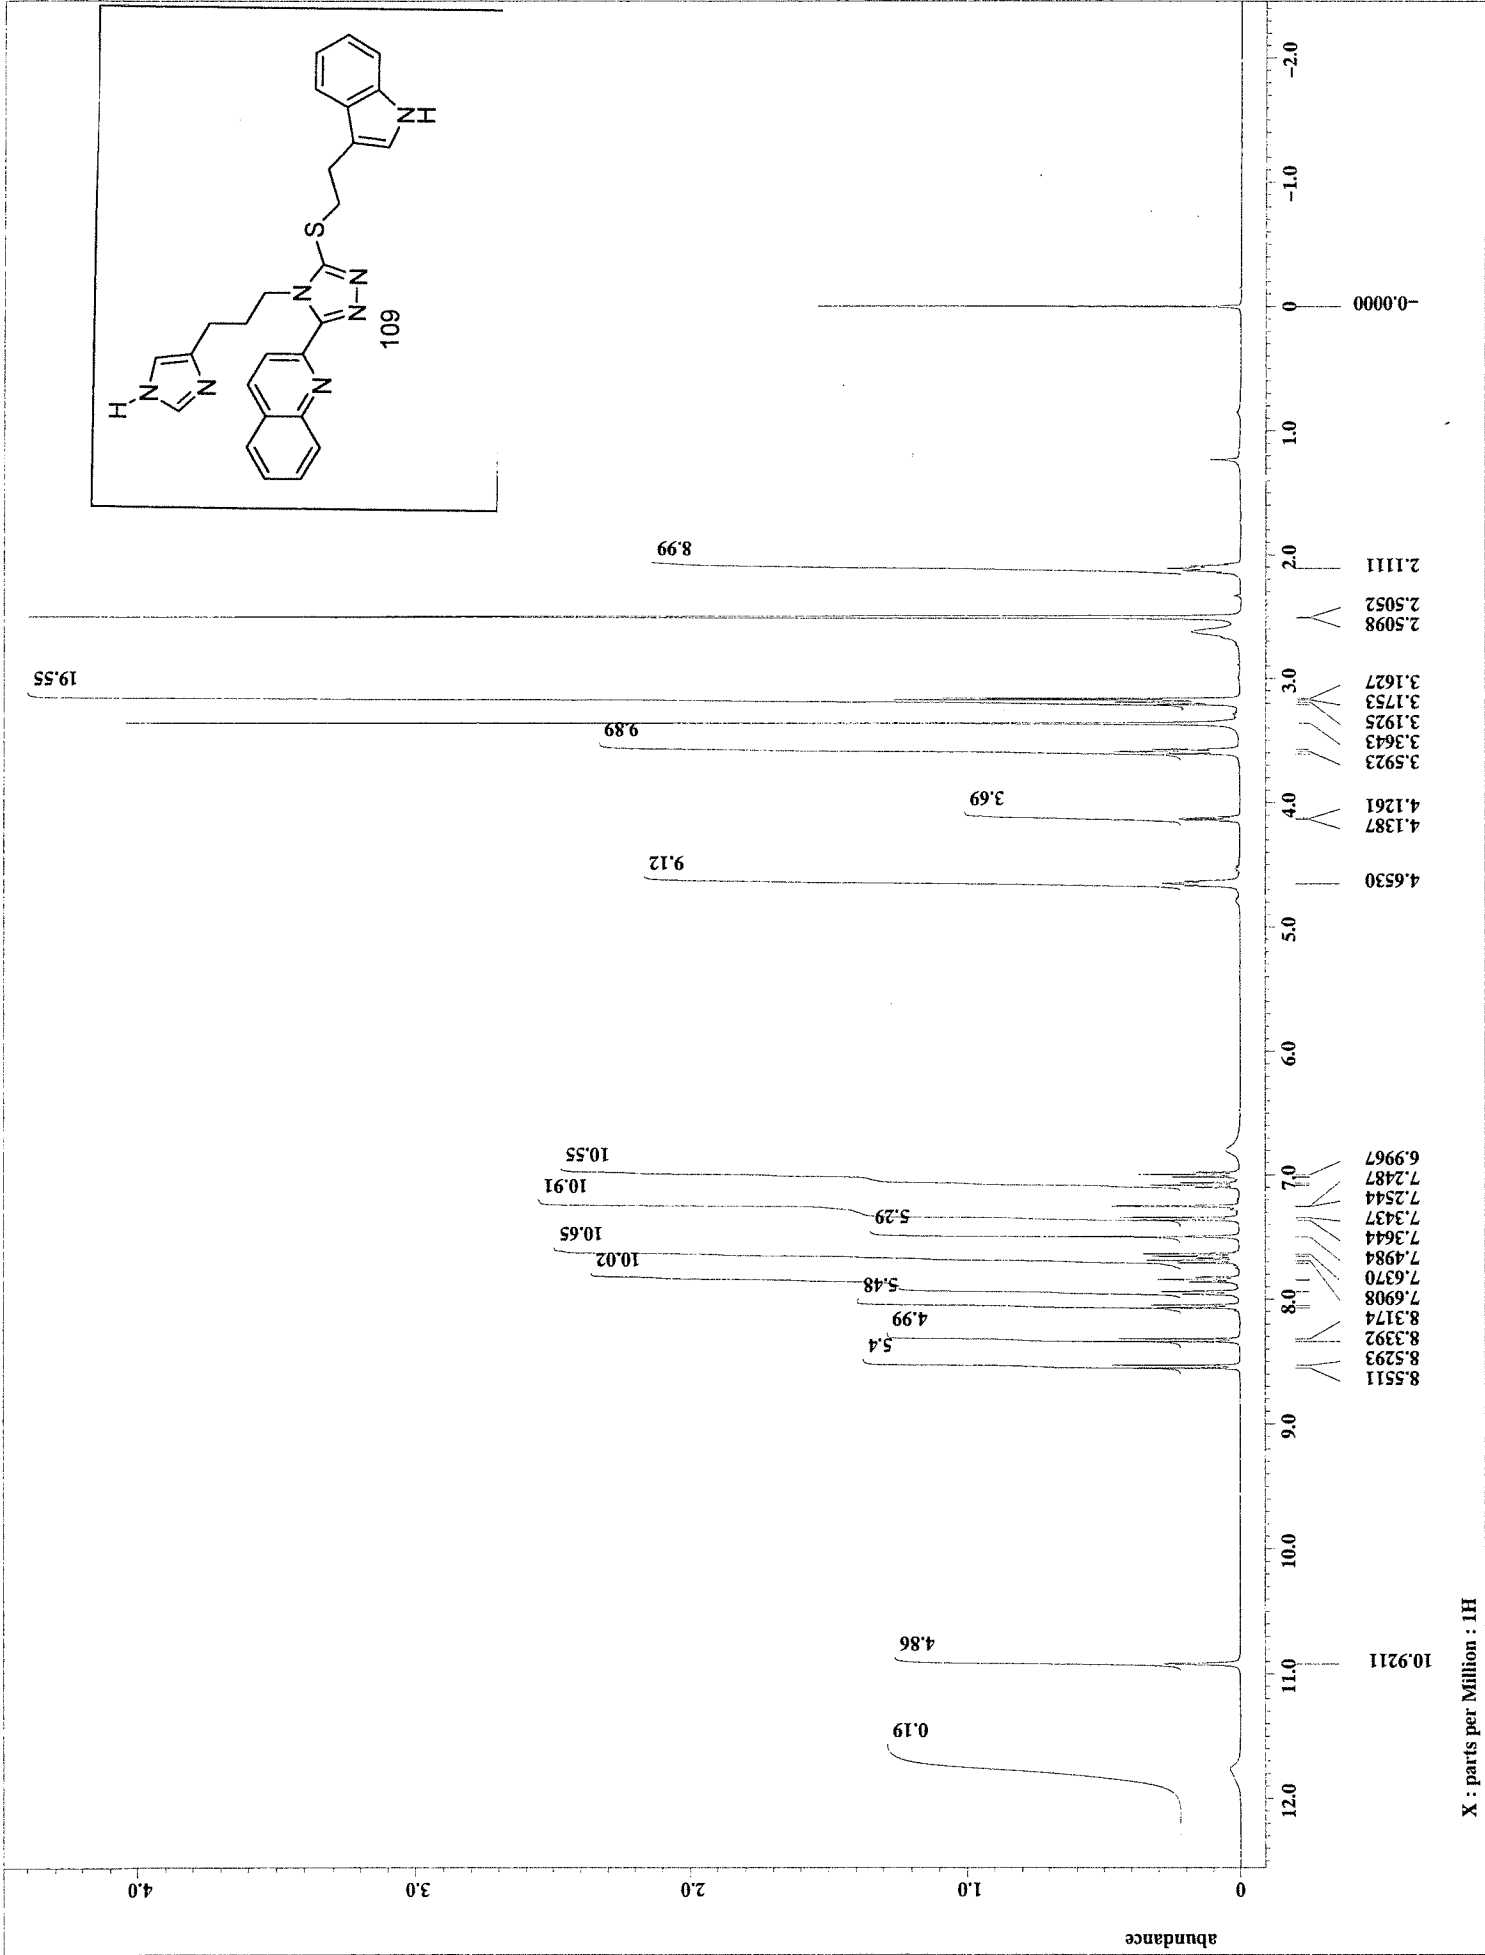

X : parts per Million : 1H

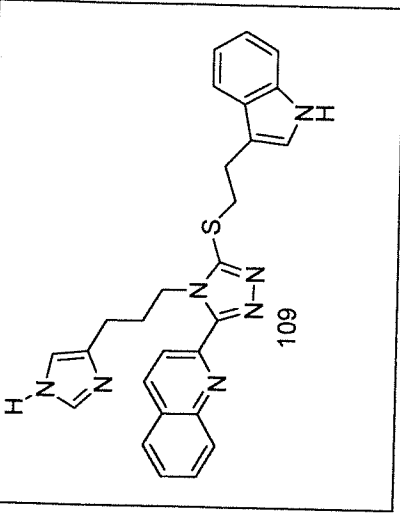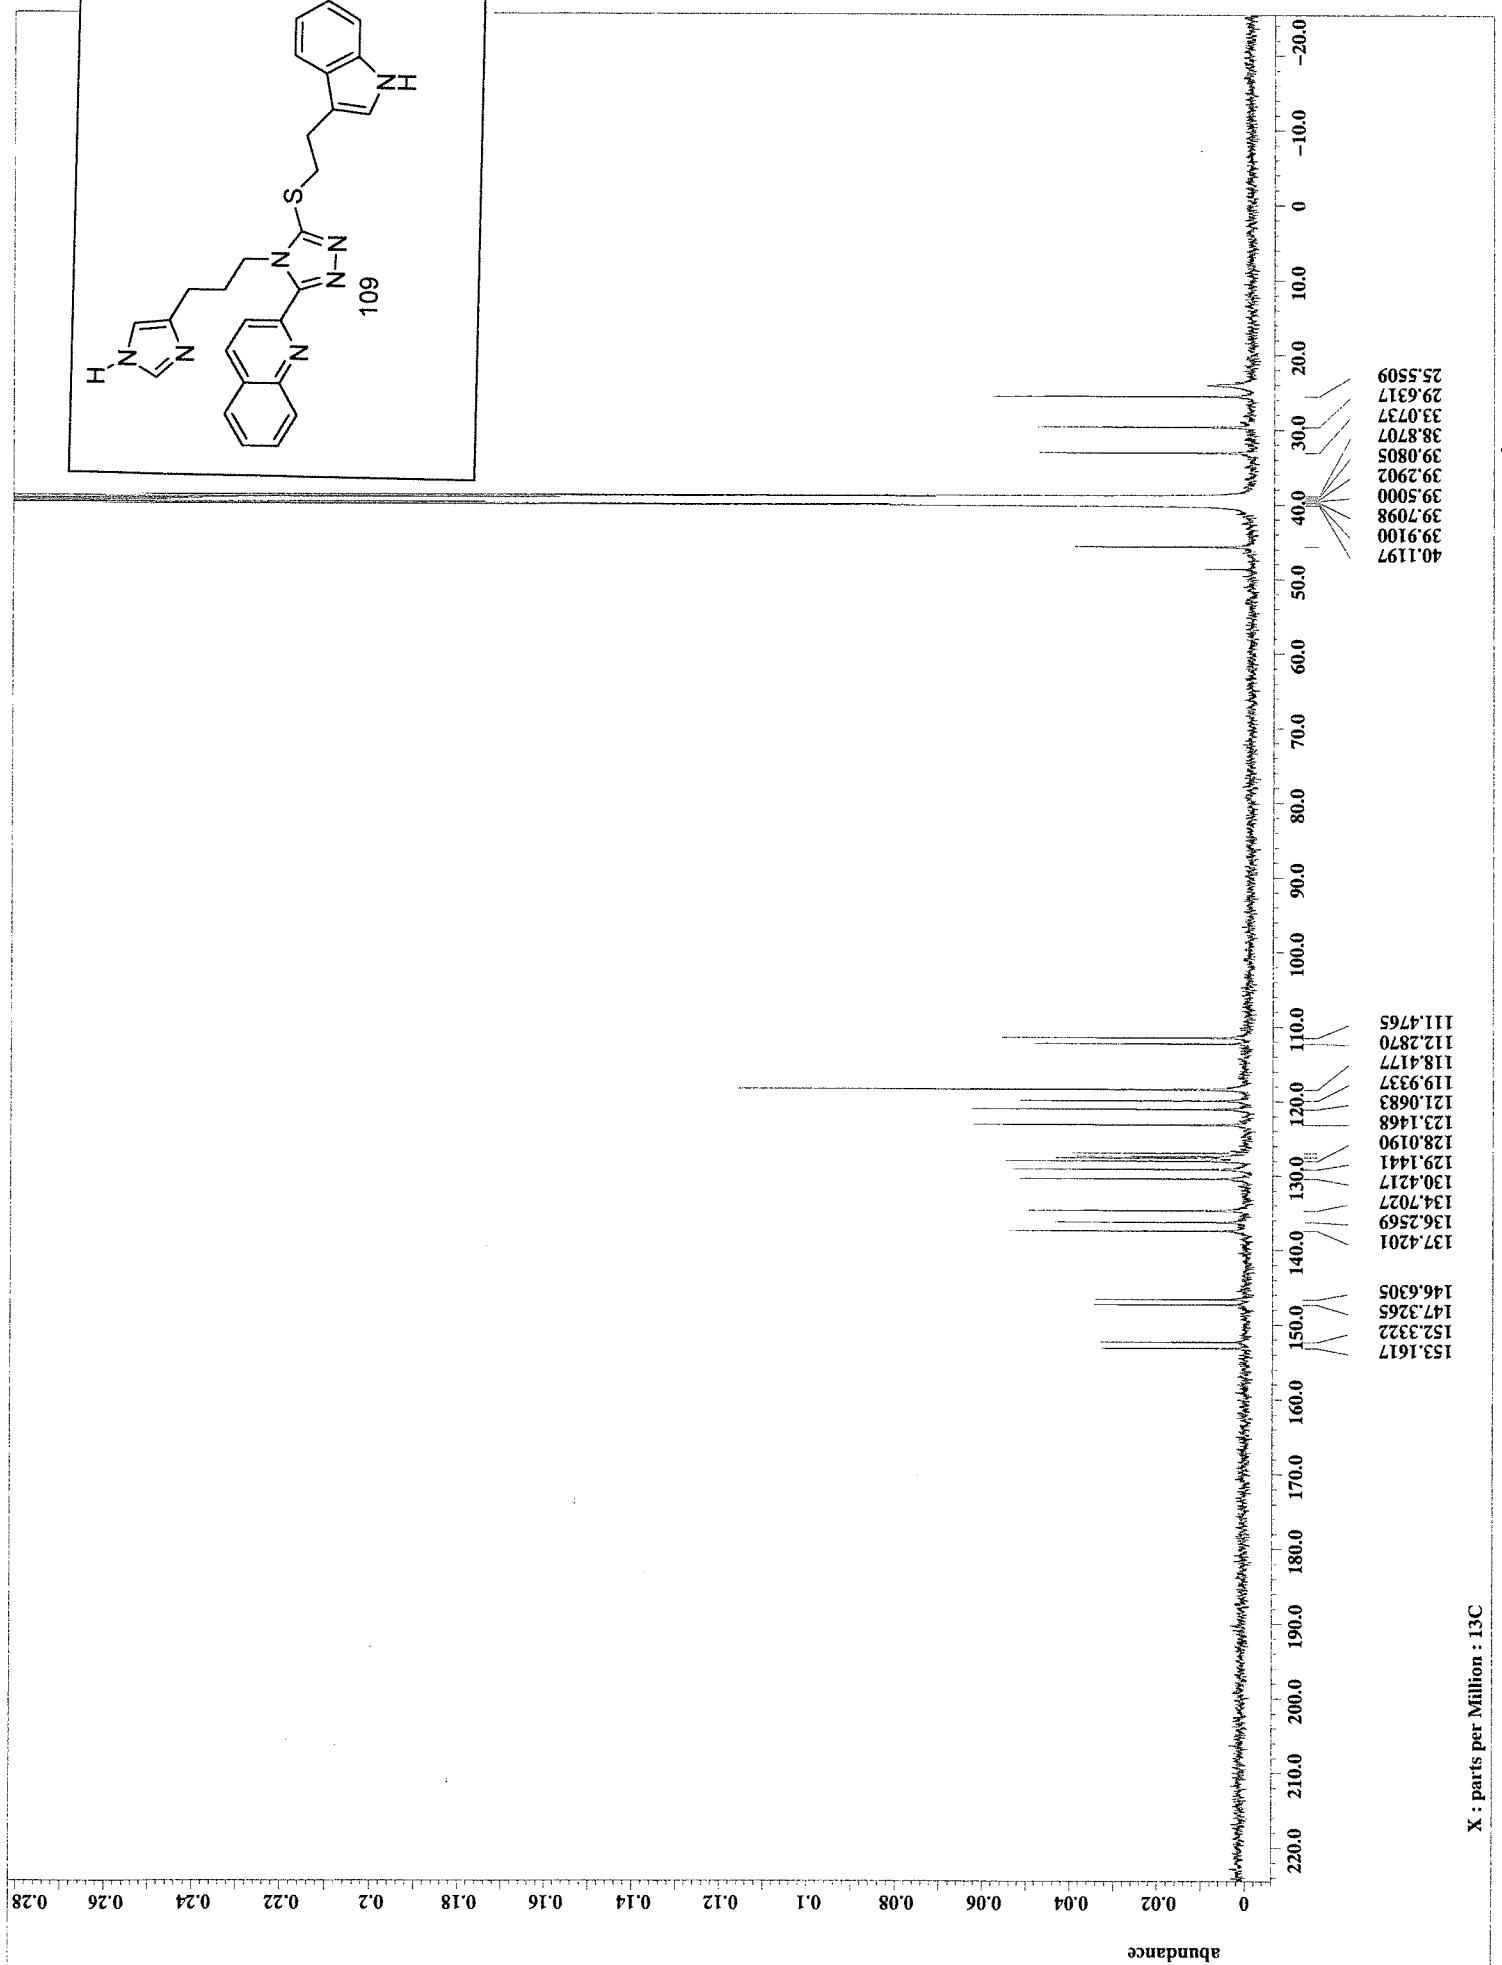

X : parts per Million : 13C

```

Filename = AWC-S2-58-3-4.jdf
Author = mcrider
Experiment = single_pulse.ex2
Sample_id = S#552083
Solvent = CHLOROFORM-D
Creation_time = 29-JUN-2018 13:54:54
Revision_time = 7-MAY-2024 08:50:41
Current_time = 7-MAY-2024 08:50:56

Comment = single_pulse
Data_format = 1D_COMPLEX
Dim_size = 13107
Dim_title = 1H
Dim_units = [ppm]
Dimensions = X
Site = ECS 400
Spectrometer = JNM-ECS400

Field_strength = 9.389766[T] (400[MHz])
X_acq_duration = 2.18365952[s]
X_domain = 1H
X_freq = 399.78219838[MHz]
X_offset = 5[ppm]
X_points = 16384
X_prescans = 1
X_resolution = 0.45794685[Hz]
X_sweep = 7.5030012[kHz]
Irr_domain = 1H
Irr_freq = 399.78219838[MHz]
Irr_offset = 5[ppm]
Tri_domain = 1H
Tri_freq = 399.78219838[MHz]
Tri_offset = 5[ppm]
Clipped = TRUE
Mod_return = 1
Scans = 8
Total_scans = 8

X_90_width = 10.65[us]
X_acq_time = 2.18365952[s]
X_angle = 45[deg]
X_atn = 6[dB]
X_pulse = 5.225[us]
Irr_mode = Off
Tri_mode = Off
Dante_presat = FALSE
Initial_wait = 1[s]
Recvr_gain = 50
Relaxation_delay = 5[s]
Repetition_time = 7.18365952[s]
Temp_cat = 20[degC]
  
```

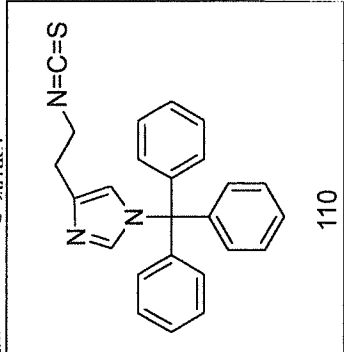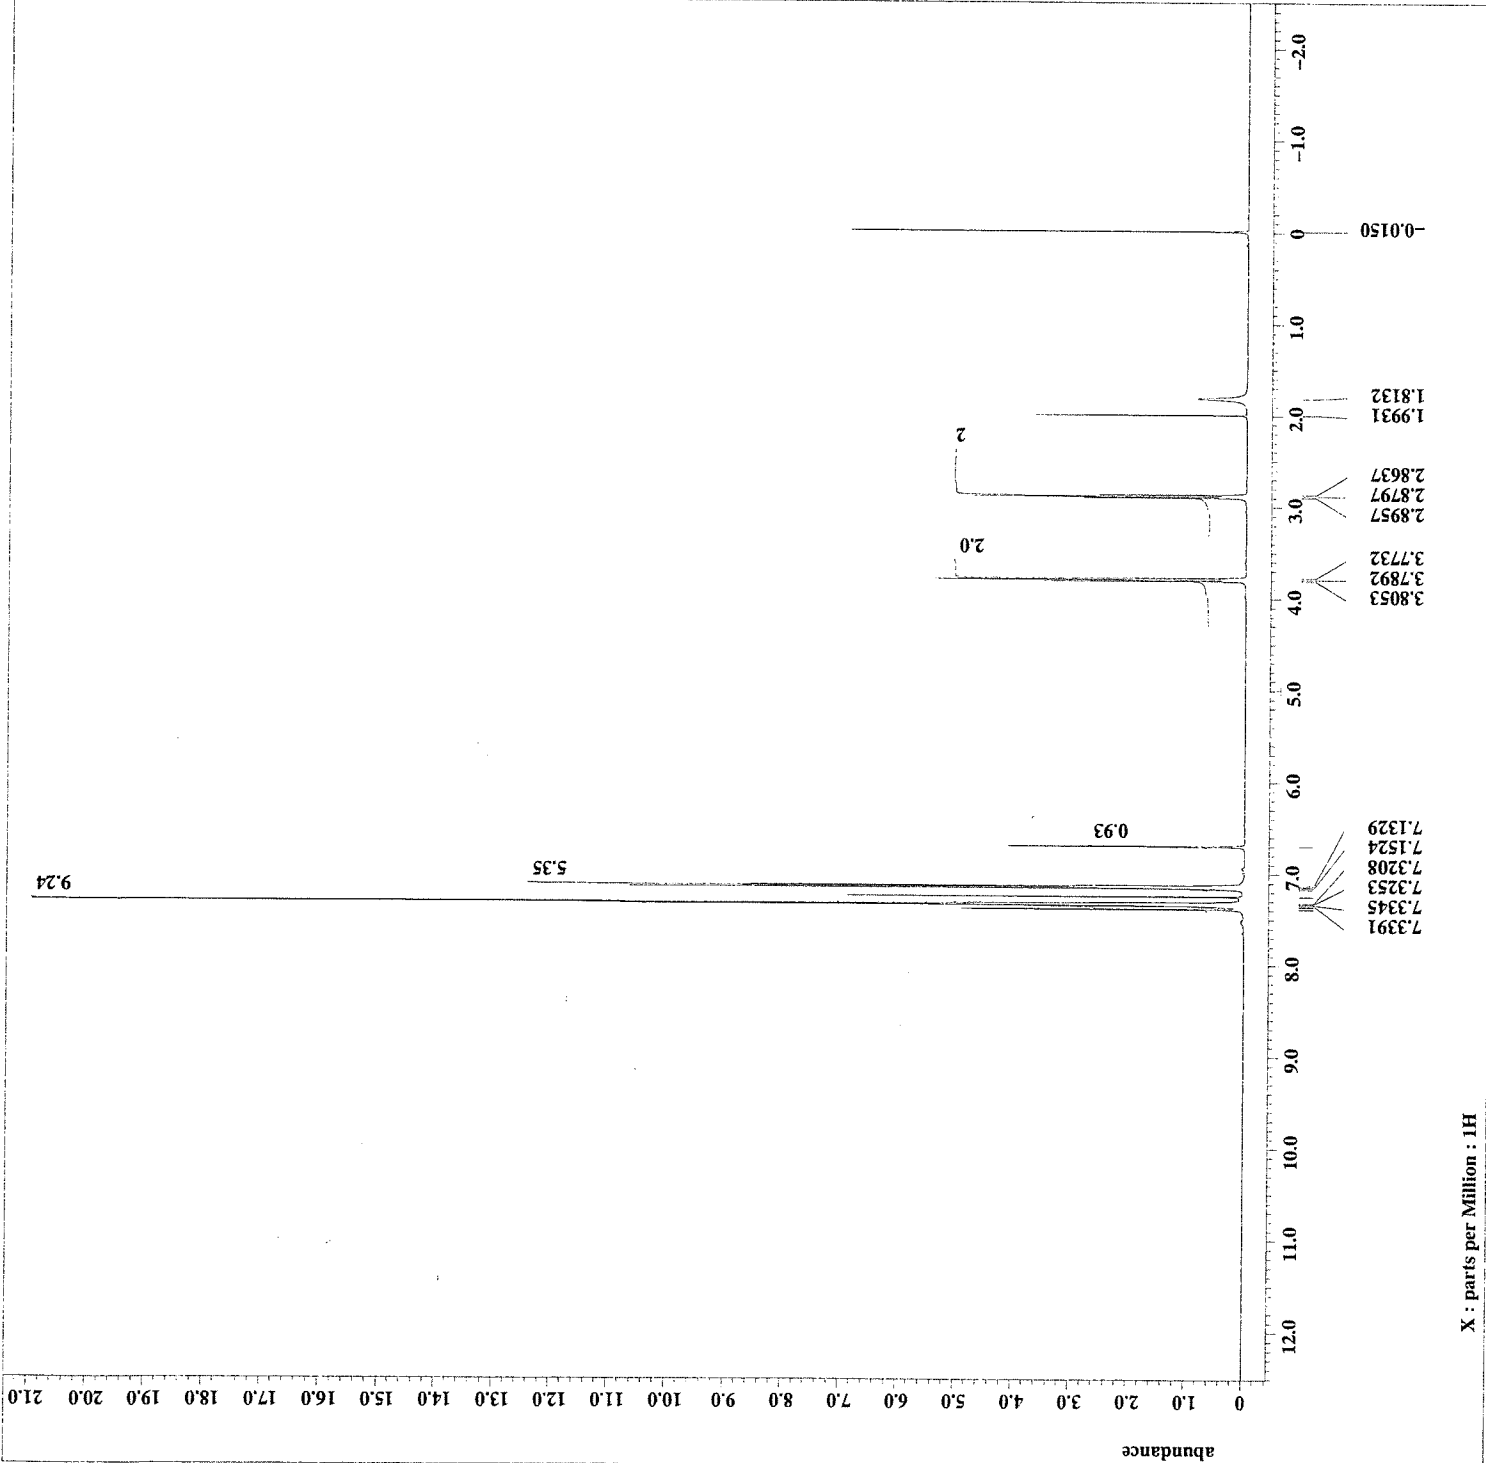

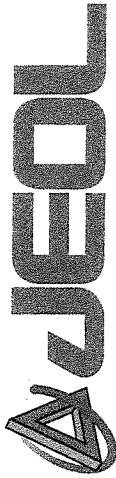

File name = LG-I-35-1 IN CH2CL2-5  
Author = Delta  
Experiment = single\_pulse.exe  
Sample\_id = S#432422  
Solvent = DMSO-D6  
Creation\_time = 12-JUN-2019 10:30:26  
Revision\_time = 6-MAY-2024 11:09:05  
Current\_time = 6-MAY-2024 11:09:18  
Comment = single\_pulse  
Data\_format = 1D COMPLEX  
Dim\_size = 13107  
Dim\_title = 1H  
Dim\_units = [ppm]  
Dimensions = X  
Site = ECS 400  
Spectrometer = JNM-ECS400  
Field\_strength = 9.389766[T] (400 [MHz])  
X\_acq\_duration = 2.18365952[s]  
X\_domain = 1H  
X\_freq = 399.78219838 [MHz]  
X\_offset = 5 [ppm]  
X\_points = 16384  
X\_prescans = 1  
X\_resolution = 0.45794685 [Hz]  
X\_sweep = 7.5030012 [KHz]  
Irr\_domain = 1H  
Irr\_freq = 399.78219838 [MHz]  
Irr\_offset = 5 [ppm]  
Tri\_domain = 1H  
Tri\_freq = 399.78219838 [MHz]  
Tri\_offset = 5 [ppm]  
Clipped = TRUE  
Mod\_return = 1  
Scans = 8  
Total\_scans = 8  
X\_90\_width = 11.365 [us]  
X\_acq\_time = 2.18365952 [s]  
X\_angle = 45 [deg]  
X\_atn = 6 [dB]  
X\_pulse = 5.6825 [us]  
Irr\_mode = Off  
Tri\_mode = Off  
Dante\_preatt = FALSE  
Initial\_wait = 1 [s]  
Recvr\_gain = 50  
Relaxation\_delay = 5 [s]  
Repetition\_time = 7.18365952 [s]  
Temp\_get = 19.6 [dC]

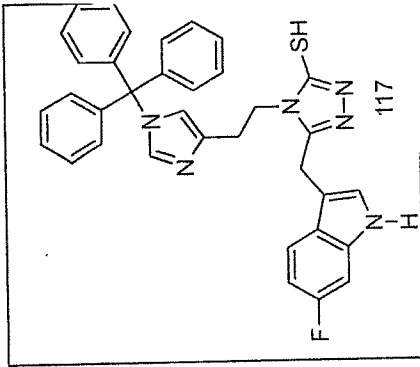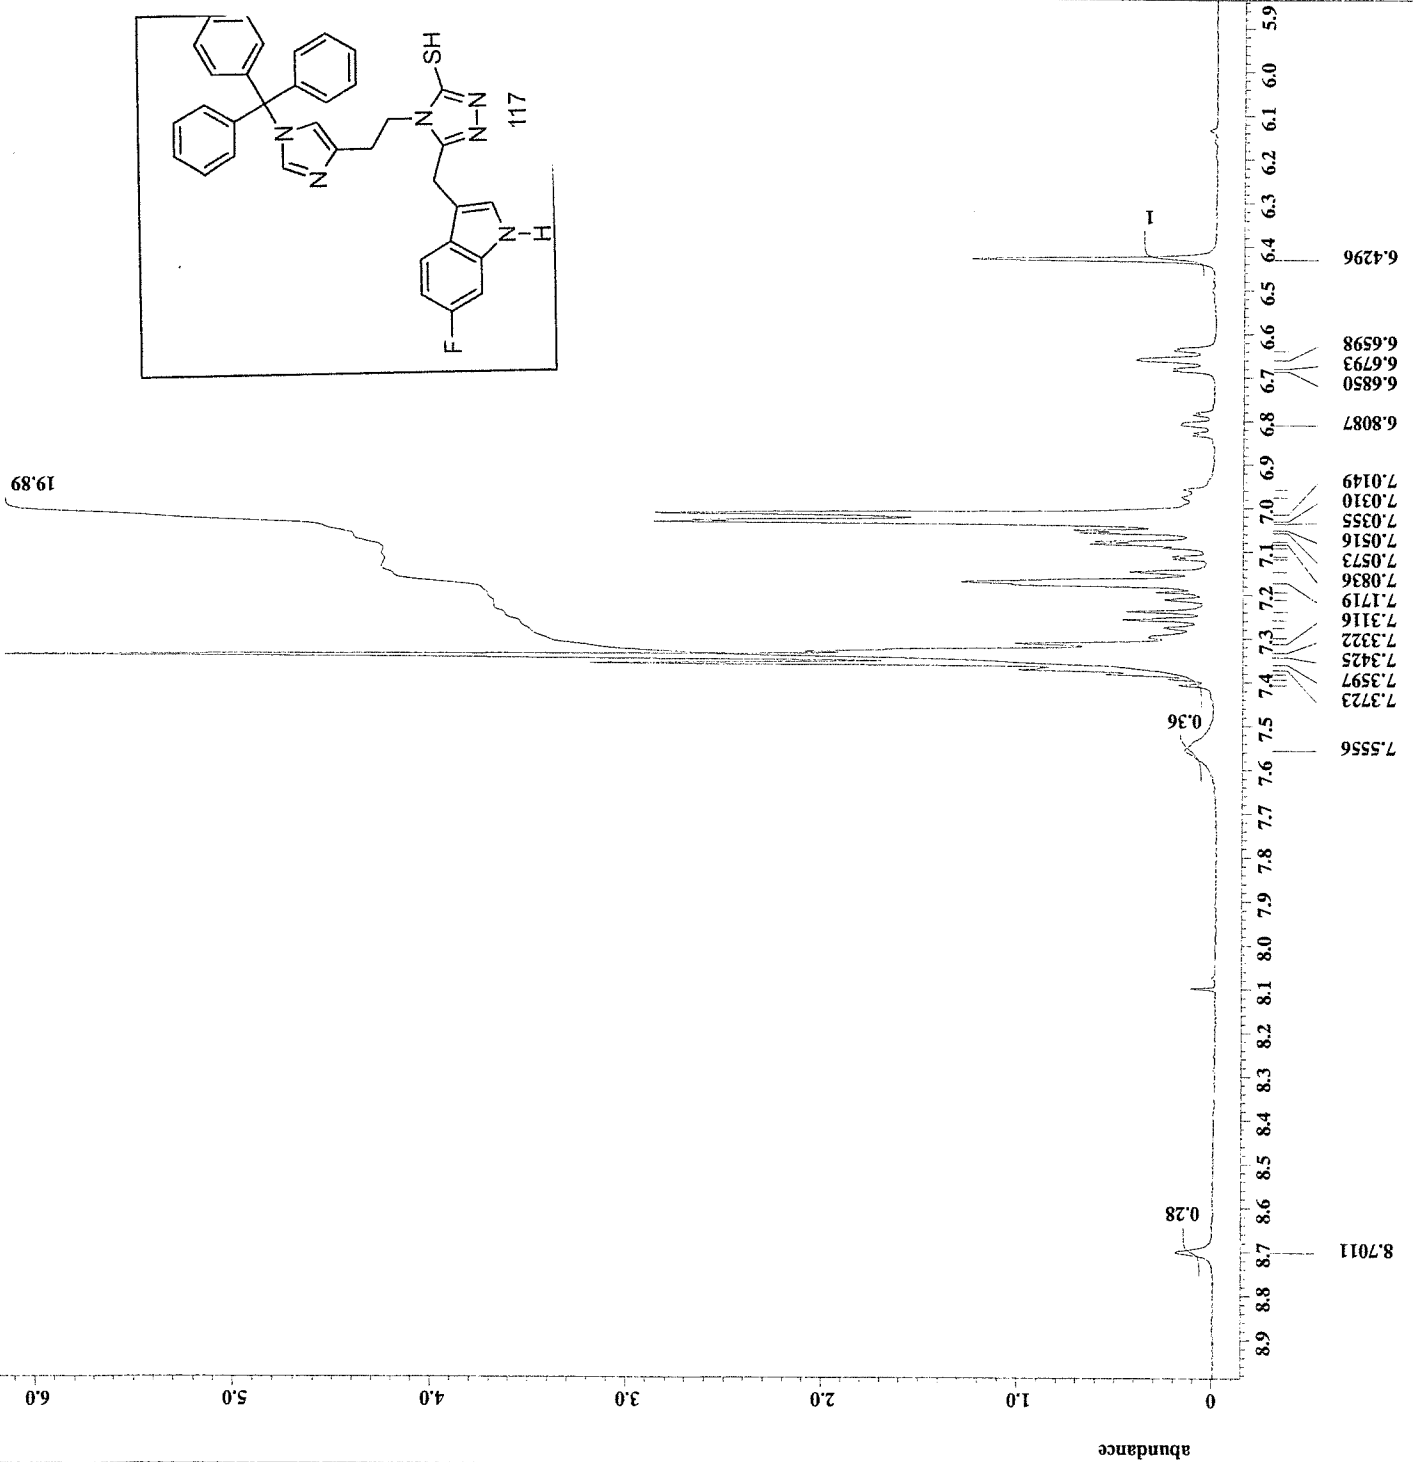

X : parts per Million : 1H

# ADJEO

= LG-I-35-1 IN CH2CL2-4  
 = Delta  
 = single\_pulse.ex2  
 = S#432422  
 = DMSO-D6  
 = 12-JUN-2019 10:30:26  
 = 6-MAY-2024 11:05:42  
 = 6-MAY-2024 11:05:55

= single\_pulse  
 = ID COMPLEX  
 = 13107  
 = 1H  
 = [ppm]  
 = X  
 = ECS 400  
 = JNM-ECS400

Field\_strength = 9.389766 [T] (400 [MHz])  
 X\_acq\_duration = 2.18365952 [s]  
 X\_domain = 1H  
 X\_freq = 399.78219838 [MHz]  
 X\_offset = 5 [ppm]  
 X\_points = 16384  
 X\_prescans = 1  
 X\_resolution = 0.45794685 [Hz]  
 X\_sweep = 7.5030012 [kHz]  
 Irr\_domain = 1H  
 Irr\_freq = 399.78219838 [MHz]  
 Irr\_offset = 5 [ppm]  
 Tri\_domain = 1H  
 Tri\_freq = 399.78219838 [MHz]  
 Clipped = TRUE  
 Mod\_return = 1  
 Scans = 8  
 Total\_scans = 8

X\_90\_width = 11.365 [us]  
 X\_acq\_time = 2.18365952 [s]  
 X\_angle = 45 [deg]  
 X\_atn = 6 [dB]  
 X\_pulse = 5.6825 [us]  
 Irr\_mode = Off  
 Tri\_mode = Off  
 Dante\_presat = FALSE  
 Initial\_wait = 1 [s]  
 Recvr\_gain = 50

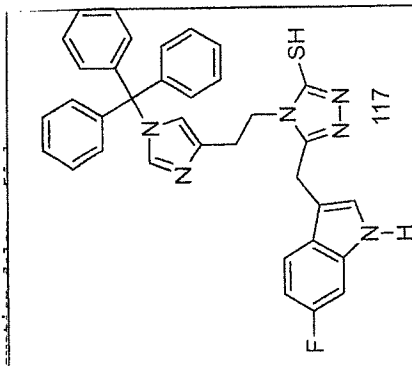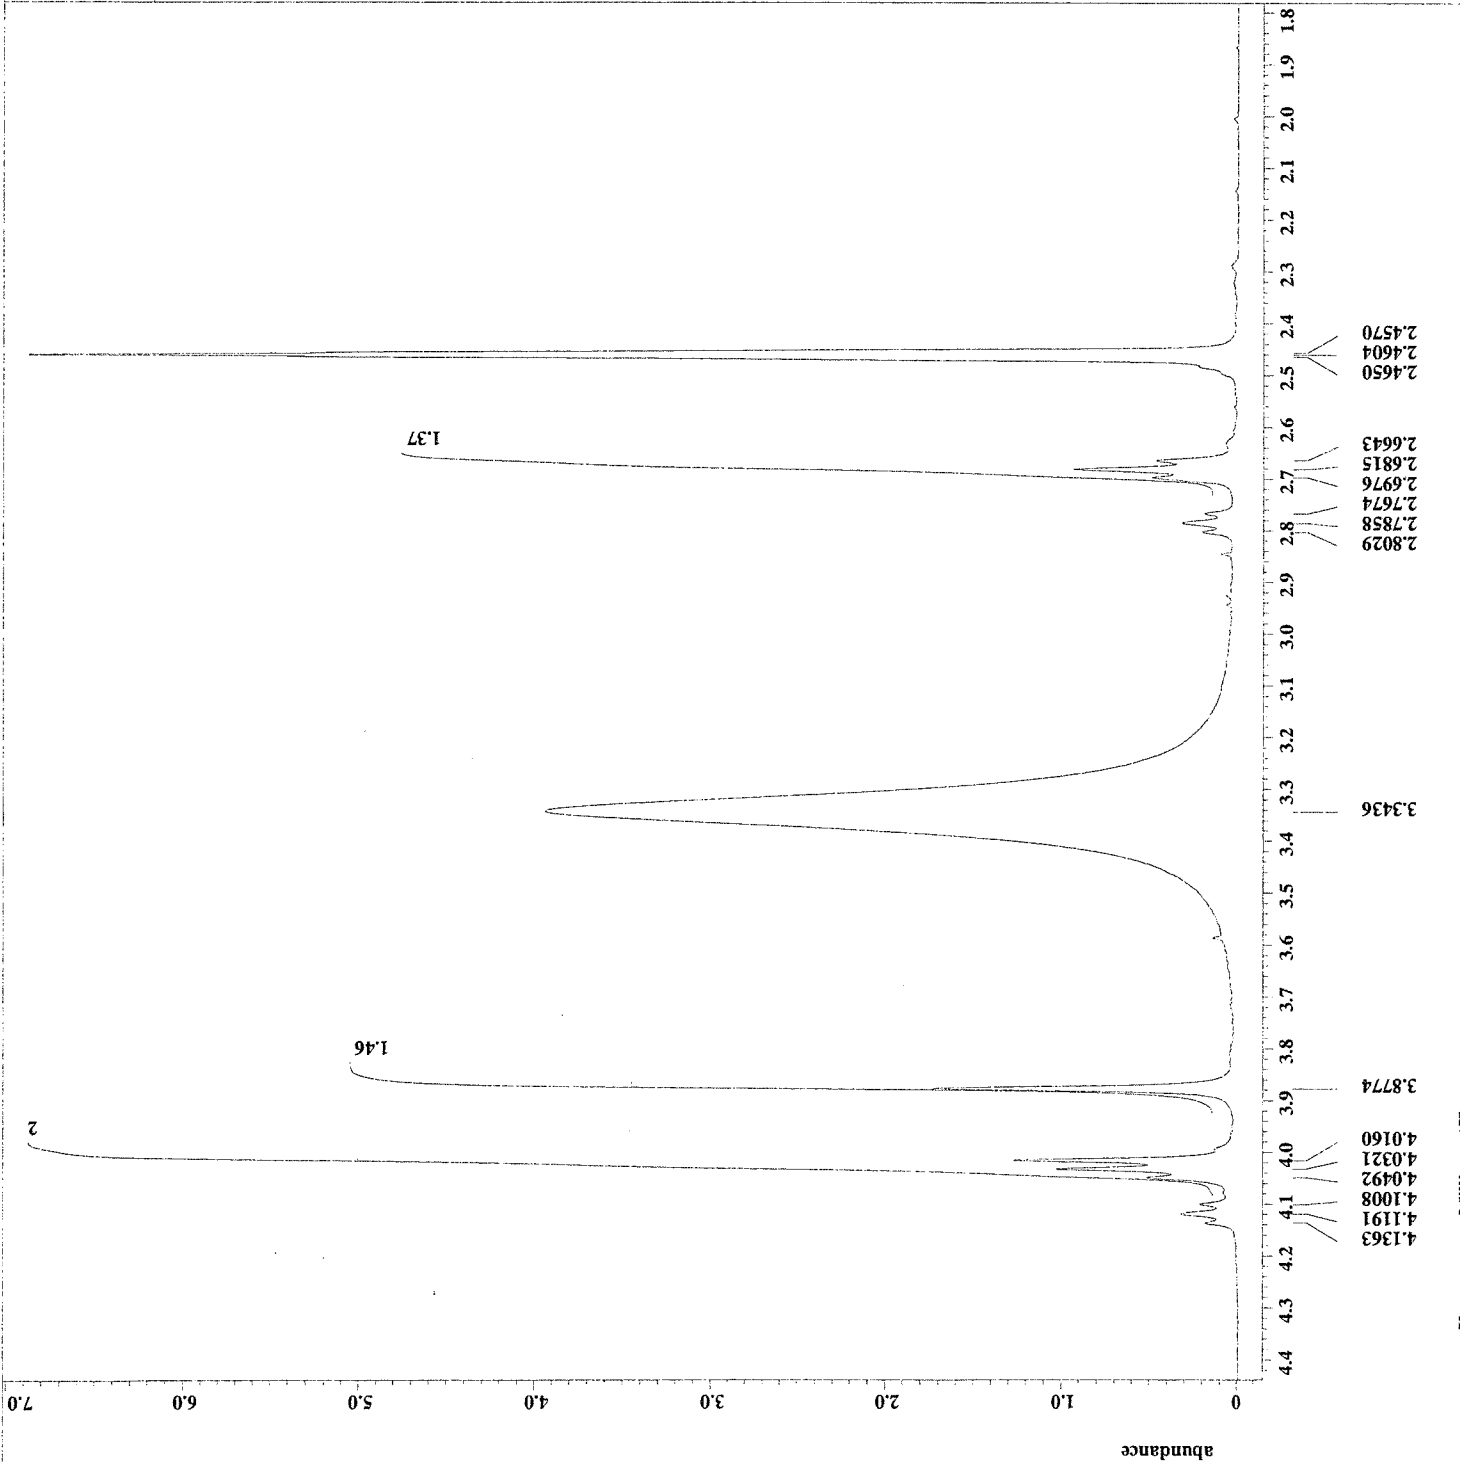

X : parts per Million : 1H

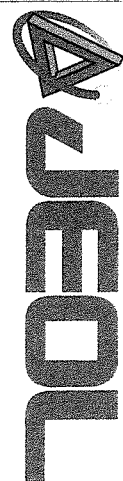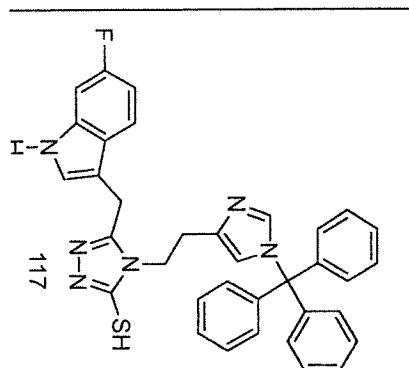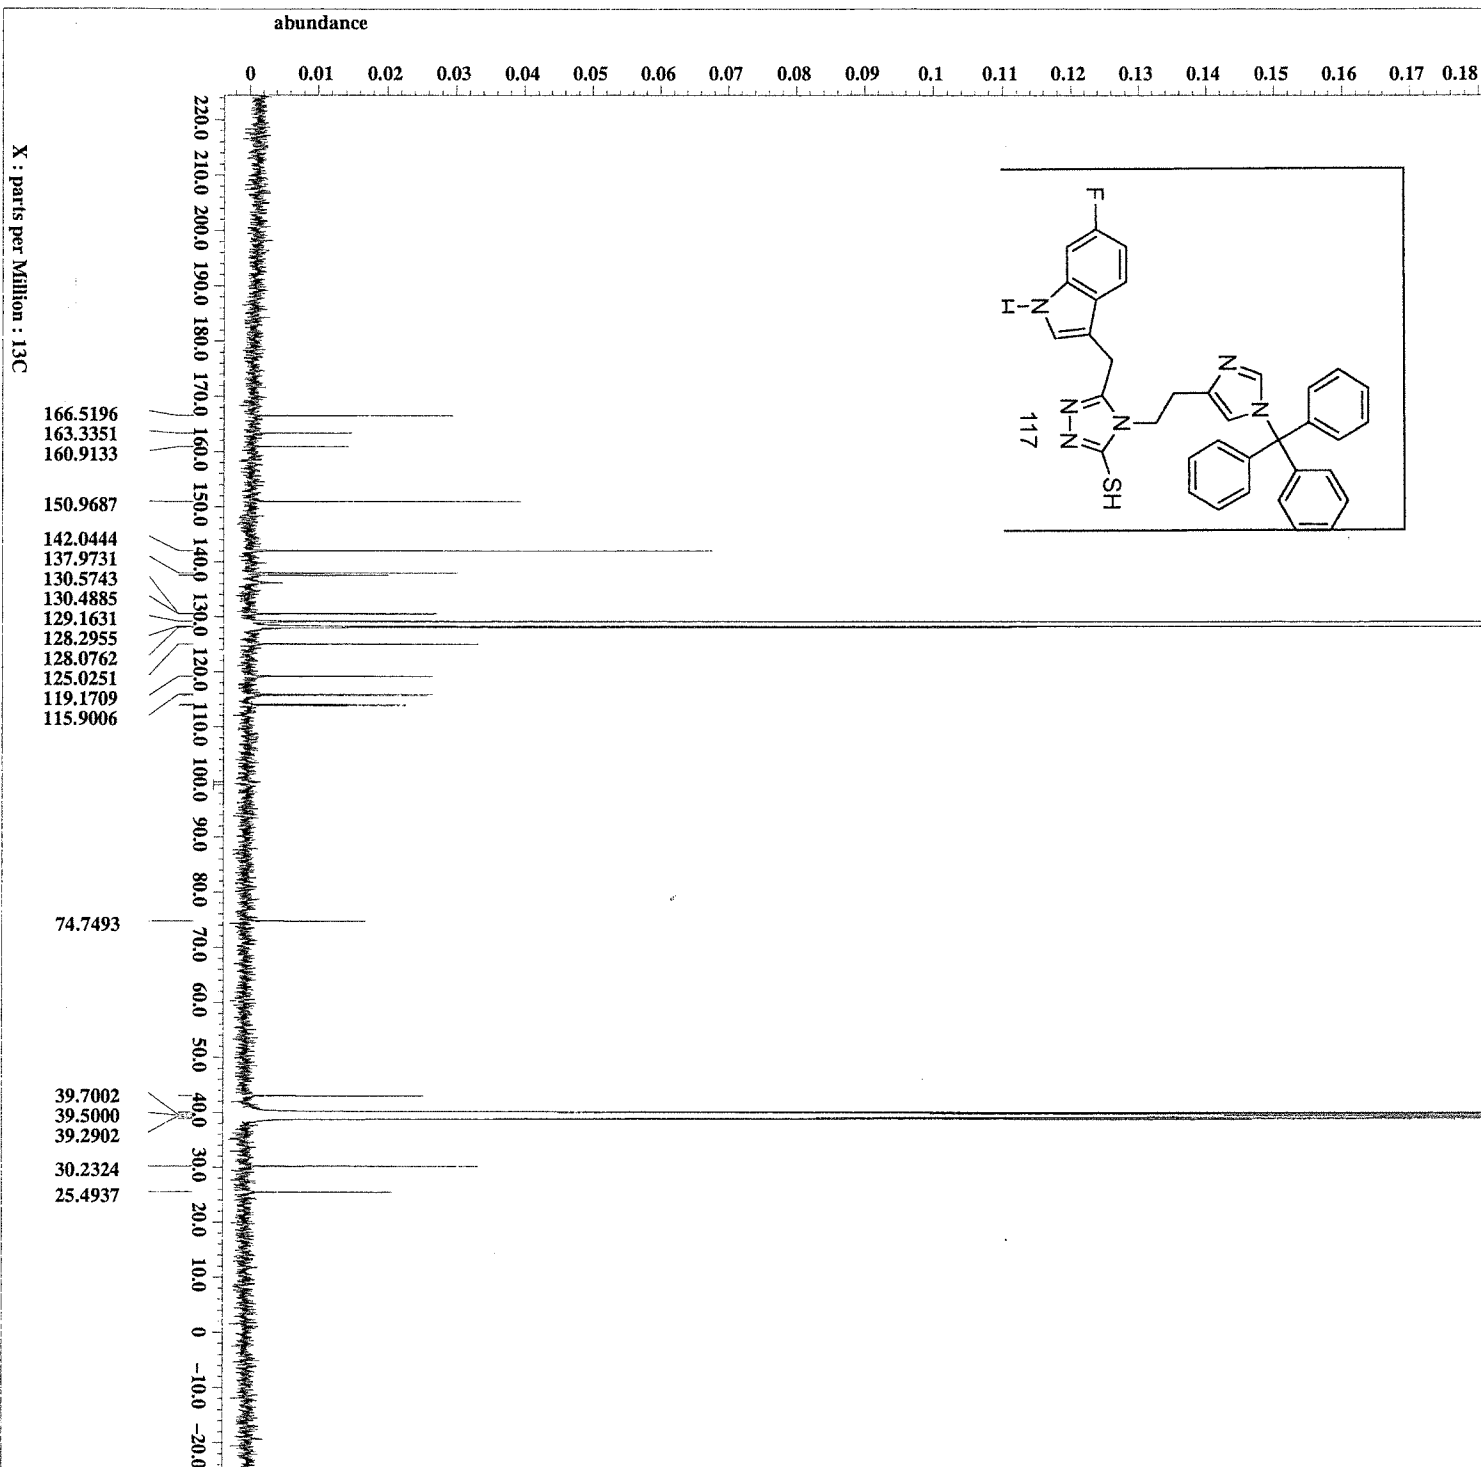

X : parts per Million : 13C

Filename = LG-m-F\_SH\_CARBON-5.fid  
Author =  
Experiment = single\_pulse\_dec  
Sample\_id = LG-m-F\_SH  
Solvent = DMSO-D6  
Creation\_time = 30-NOV-2018 01:27:06  
Revision\_time = 3-MAY-2024 10:48:52  
Current\_time = 3-MAY-2024 10:49:43

Data\_format = 1D\_COMPLEX  
Dim\_size = 26214  
Dim\_title = 13C  
Dim\_units = [ppm]  
Dimensions = X  
Site = ECS 400  
Spectrometer = JNM-ECS400

Field\_strength = 9.389766 [T] (400 [MHz])  
X\_acq\_duration = 1.0433312 [s]  
X\_domain = 13C  
X\_freq = 100.52530333 [MHz]  
X\_offset = 100 [ppm]  
X\_points = 32768  
X\_prescans = 4  
X\_resolution = 0.95846665 [Hz]  
X\_sweep = 31.40703518 [kHz]  
Irr\_domain = 1H  
Irr\_freq = 399.78219838 [MHz]  
Irr\_offset = 5 [ppm]  
Clipped = FALSE  
Mod\_return = 1  
Scans = 12000  
Total\_scans = 12000

X\_90\_width = 10.4 [us]  
X\_acq\_time = 1.0433312 [s]  
X\_angle = 30 [deg]  
X\_atn = 9 [dB]  
X\_pulse = 3.46566667 [us]  
Irr\_atn\_dec = 24.2 [dB]  
Irr\_atn\_noe = 24.2 [dB]  
Irr\_noise = VOLTZ  
Decoupling = TRUE  
Initial\_wait = 1 [s]  
Noe = TRUE  
Noe\_time = 2 [s]  
Recvr\_gain = 58  
Relaxation\_delay = 2 [s]  
Repetition\_time = 3.0433312 [s]  
Temp\_get = 17.6 [dC]

= LG-I-62-1-3.jdf  
 = mcrider  
 = single\_pulse.ex2  
 = S#362129  
 = DMSO-D6  
 = 27-JUN-2019 08:26:29  
 = 2-MAY-2024 08:55:14  
 = 2-MAY-2024 08:56:08

= single\_pulse  
 = 1D COMPLEX  
 = 13107  
 = 1H  
 = [ppm]  
 = X  
 = ECS 400  
 = JNM-ECS400

= 9.389766 [T] (400 [MHz])  
 = 2.18365952 [s]  
 = 1H  
 = 399.78219838 [MHz]  
 = 5 [ppm]  
 = 16384  
 = 1  
 = 0.45794685 [Hz]  
 = 7.5030012 [kHz]  
 = 1H  
 = 399.78219838 [MHz]  
 = 5 [ppm]  
 = 1H  
 = 399.78219838 [MHz]  
 = 5 [ppm]  
 = TRUE  
 = 1  
 = 8

= 11.365 [us]  
 = 2.18365952 [s]  
 = 45 [deg]  
 = 6 [dB]  
 = 5.6825 [us]  
 = Off  
 = Off  
 = FALSE  
 = 1 [s]  
 = 50  
 = 5 [s]  
 = 7.18365952 [s]  
 = 19.2 [DC]

X\_90\_width  
 X\_acq\_time  
 X\_angle  
 X\_atn  
 X\_pulse  
 Irr\_mode  
 Irr\_mode  
 Dantle\_presat  
 Initial\_wait  
 Recvr\_gain  
 Relaxation\_delay  
 Repetition\_time  
 Temp\_get

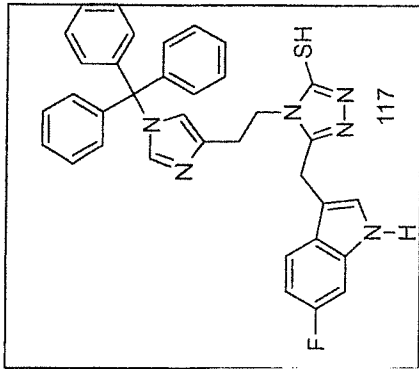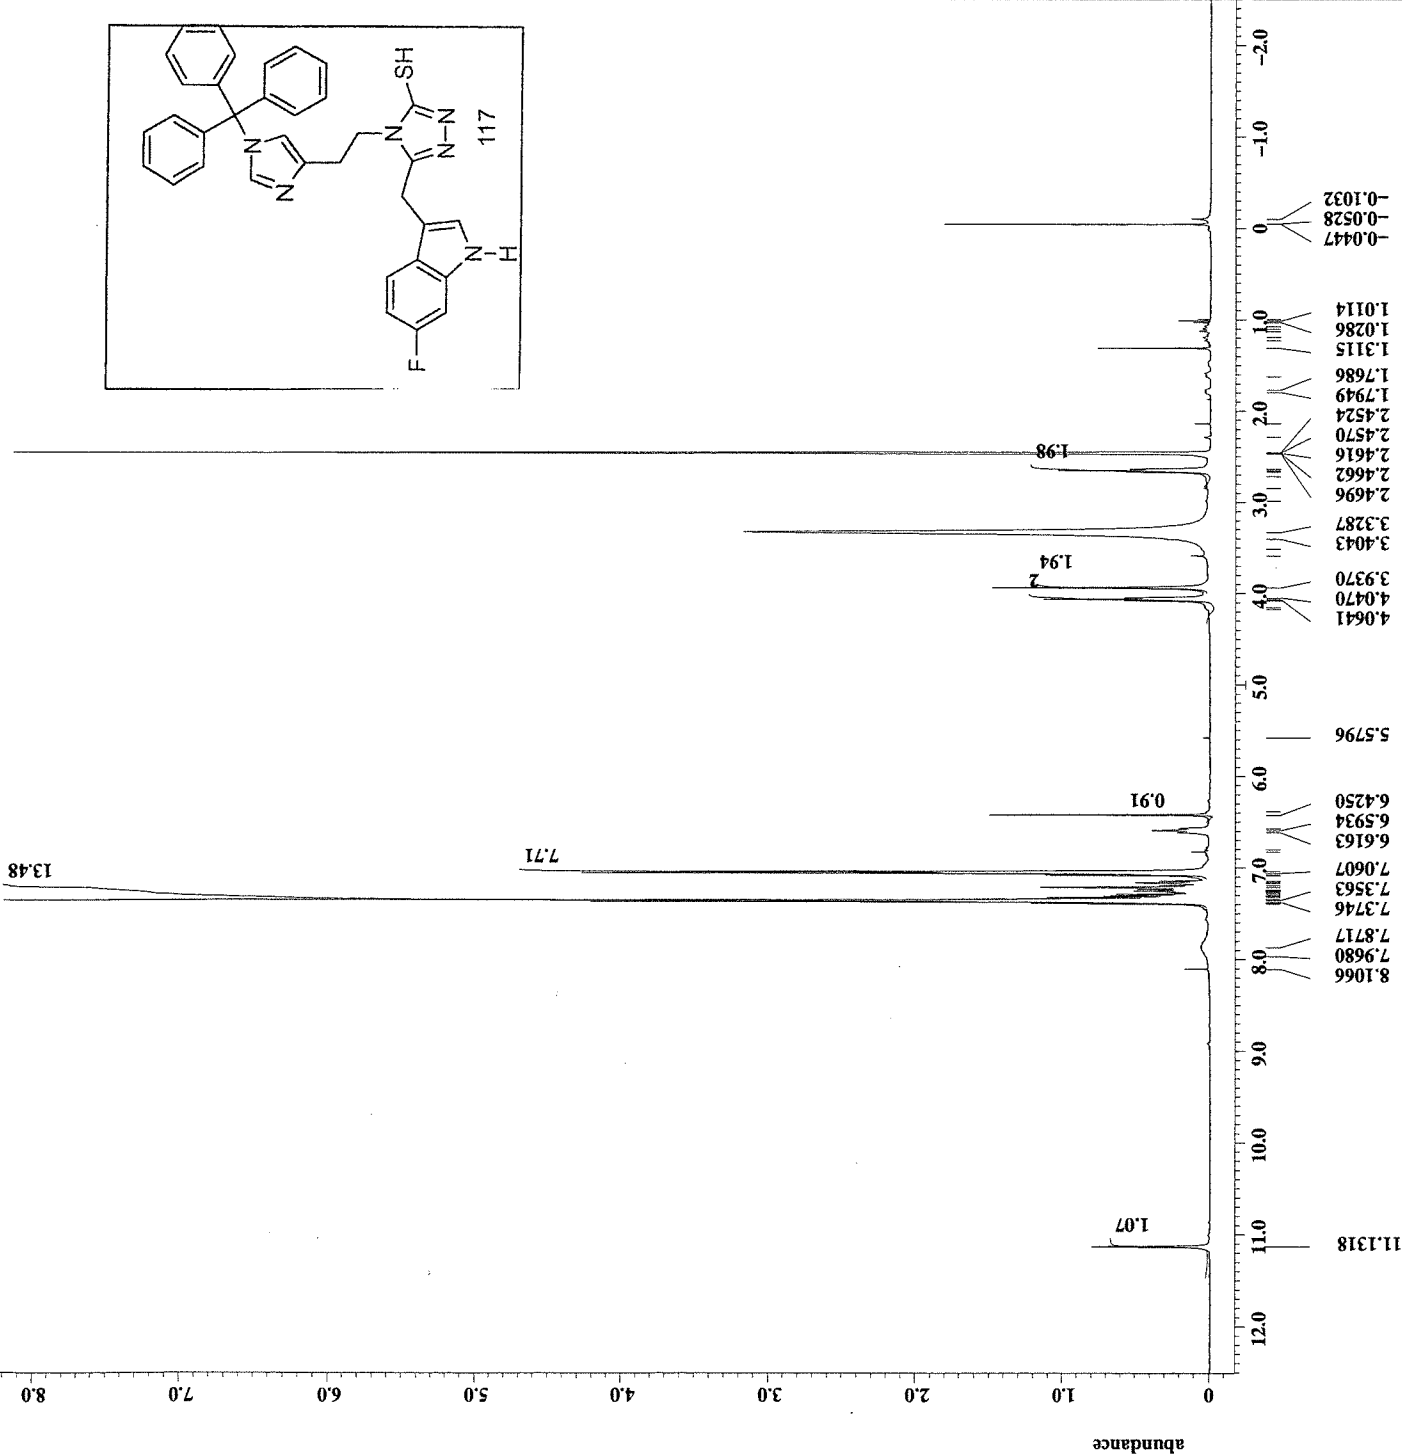



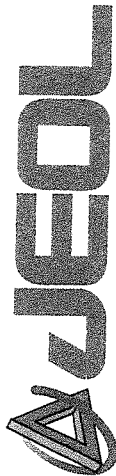

= KI 18A-7recrystal0911  
 = Delta  
 = single\_pulse.ex2  
 = S#327147  
 = DMSO-D6  
 = 11-SEP-2018 07:42:23  
 = 7-MAY-2024 08:43:54  
 = 7-MAY-2024 08:44:05

= single\_pulse  
 = 1D COMPLEX  
 = 13107  
 = 1H  
 = [ppm]  
 = X  
 = ECS 400  
 = JNM-ECS400

= 9.389766[T] (400 [MHz])  
 = 2.18365952[s]  
 = 1H  
 = 399.78219838 [MHz]  
 = 5 [ppm]  
 = 16384  
 = 1

= 0.45794685 [Hz]  
 = 7.5030012 [kHz]  
 = 1H  
 = 399.78219838 [MHz]  
 = 5 [ppm]  
 = 399.78219838 [MHz]  
 = 5 [ppm]  
 = TRUE  
 = 1  
 = 8

= 10.65 [us]  
 = 2.18365952 [s]  
 = 45 [deg]  
 = 6 [dB]  
 = 5.325 [us]  
 = Off  
 = Off

= FALSE  
 = 1 [s]  
 = 50  
 = 5 [s]  
 = 7.18365952 [s]  
 = 19.3 [dC]

= single\_pulse  
 = 1D COMPLEX  
 = 13107  
 = 1H  
 = [ppm]  
 = X  
 = ECS 400  
 = JNM-ECS400

= 9.389766[T] (400 [MHz])  
 = 2.18365952[s]  
 = 1H  
 = 399.78219838 [MHz]  
 = 5 [ppm]  
 = 16384  
 = 1

= 0.45794685 [Hz]  
 = 7.5030012 [kHz]  
 = 1H  
 = 399.78219838 [MHz]  
 = 5 [ppm]  
 = 399.78219838 [MHz]  
 = 5 [ppm]  
 = TRUE  
 = 1  
 = 8

= 10.65 [us]  
 = 2.18365952 [s]  
 = 45 [deg]  
 = 6 [dB]  
 = 5.325 [us]  
 = Off  
 = Off

= FALSE  
 = 1 [s]  
 = 50  
 = 5 [s]  
 = 7.18365952 [s]  
 = 19.3 [dC]

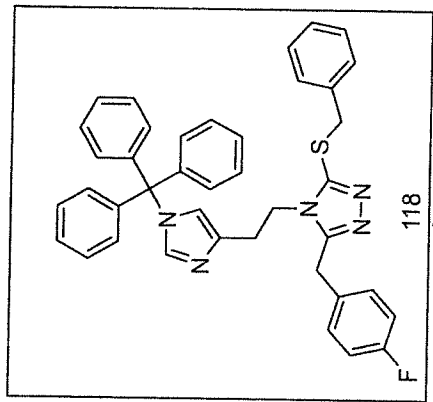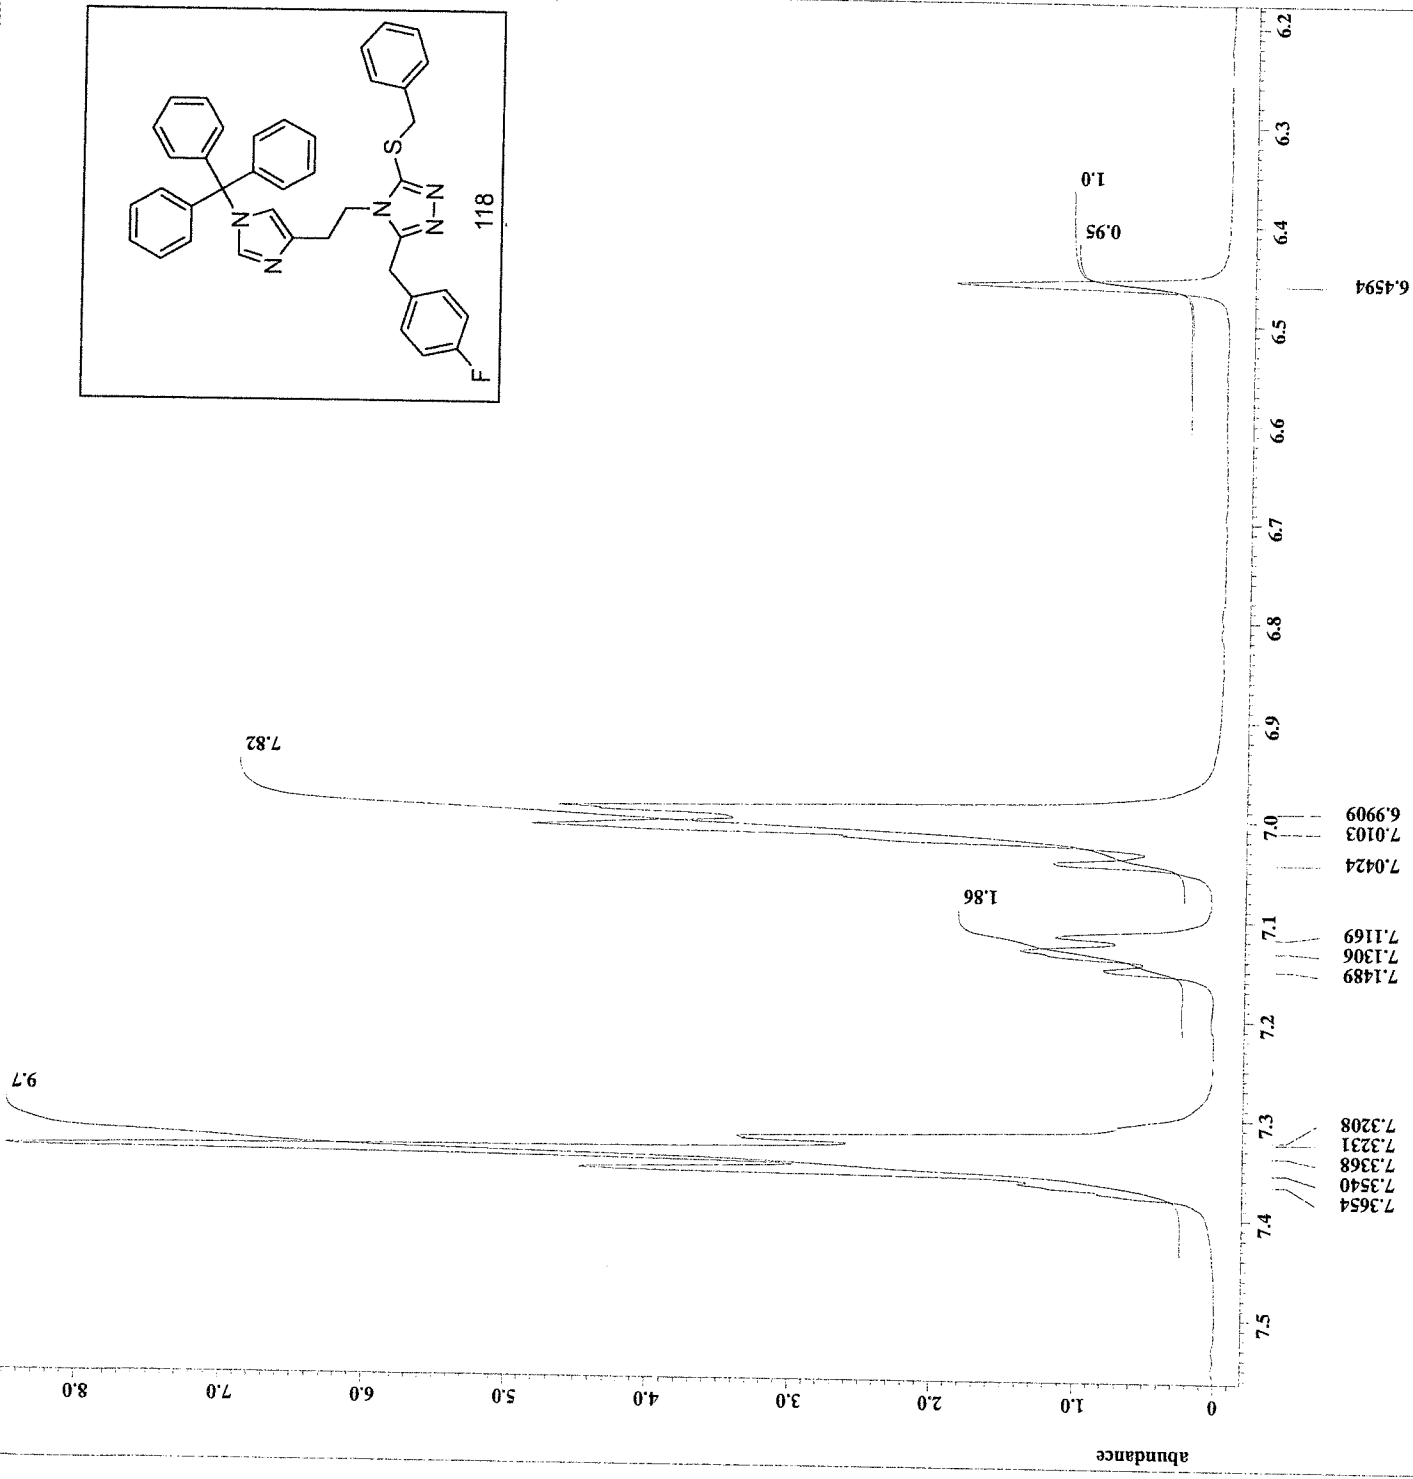

X : parts per Million : 1H

= KI\_18A-7recrystal0911  
 = Delta  
 = single\_pulse.ex2  
 = #327147  
 = DMSO-D6  
 = 11-SEP-2018 07:42:23  
 = 7-MAY-2024 08:44:35  
 = 7-MAY-2024 08:45:03

= single\_pulse  
 = 1D COMPLEX  
 = 13107  
 = 1H  
 = [ppm]  
 = X  
 = ECS 400  
 = JNM-ECS400

= 9.389766[T] (400 [MHz])  
 = 2.18365952[s]  
 = 1H  
 = 399.78219838 [MHz]  
 = 5 [ppm]  
 = 16384  
 = 1

= 0.45794685 [Hz]  
 = 7.5030012 [kHz]  
 = 1H  
 = 399.78219838 [MHz]  
 = 5 [ppm]  
 = TRUE  
 = 1  
 = 8

= 10.65 [us]  
 = 2.18365952 [s]  
 = 45 [deg]  
 = 6 [dB]  
 = 5.325 [us]  
 = Off  
 = Off  
 = FALSE  
 = 1 [fs]  
 = 50  
 = 5 [s]  
 = 7.18365952 [s]  
 = 19.3 [dC]

= 10.65 [us]  
 = 2.18365952 [s]  
 = 45 [deg]  
 = 6 [dB]  
 = 5.325 [us]  
 = Off  
 = Off  
 = FALSE  
 = 1 [fs]  
 = 50  
 = 5 [s]  
 = 7.18365952 [s]  
 = 19.3 [dC]

= 10.65 [us]  
 = 2.18365952 [s]  
 = 45 [deg]  
 = 6 [dB]  
 = 5.325 [us]  
 = Off  
 = Off  
 = FALSE  
 = 1 [fs]  
 = 50  
 = 5 [s]  
 = 7.18365952 [s]  
 = 19.3 [dC]

= 10.65 [us]  
 = 2.18365952 [s]  
 = 45 [deg]  
 = 6 [dB]  
 = 5.325 [us]  
 = Off  
 = Off  
 = FALSE  
 = 1 [fs]  
 = 50  
 = 5 [s]  
 = 7.18365952 [s]  
 = 19.3 [dC]

= 10.65 [us]  
 = 2.18365952 [s]  
 = 45 [deg]  
 = 6 [dB]  
 = 5.325 [us]  
 = Off  
 = Off  
 = FALSE  
 = 1 [fs]  
 = 50  
 = 5 [s]  
 = 7.18365952 [s]  
 = 19.3 [dC]

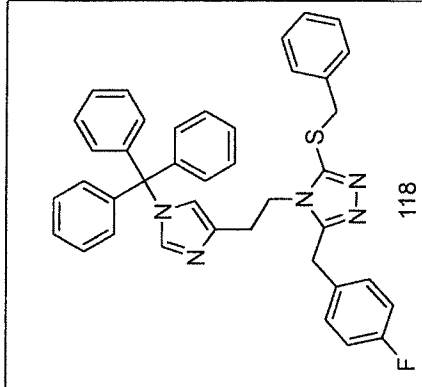

9.7

7.82

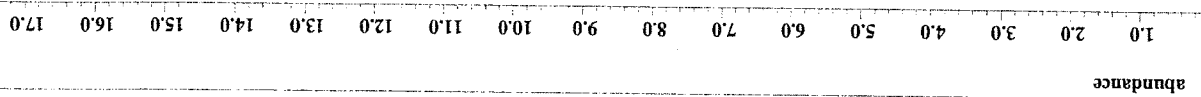

1.0080

3.9794  
3.9622  
3.7732  
3.3058  
2.7090  
2.6930  
2.6758  
2.4582  
2.4536

7.3540  
7.3368  
7.3231  
7.3208  
7.0103  
6.9909  
6.4594

X : parts per Million : 1H

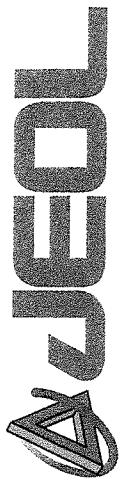

File = KI 18A-7recrystal0911  
Name = Delta  
Exp = single\_pulse.ex2  
ID = S#327147  
Sol = DMSO-D6  
Time = 11-SEP-2018 07:42:23  
Rev = 7-MAY-2024 08:44:35  
Cur = 7-MAY-2024 08:44:43

Comment = single\_pulse  
Data = 1D COMPLEX  
Dim = 13107  
Title = 1H  
Units = [ppm]  
Dim = X  
Site = ECS 400  
Spect = JNM-ECS400

Field = 9.389766 [T] (400 [MHz])  
Acq = 2.18365952 [s]  
X = 1H  
Freq = 399.78219838 [MHz]  
X = 5 [ppm]  
Points = 16384  
X = 1  
Res = 0.45794685 [Hz]  
X = 7.5030012 [kHz]  
Sweep = 1H  
X = 399.78219838 [MHz]  
Freq = 5 [ppm]  
X = 1H  
Tri = 399.78219838 [MHz]  
X = 5 [ppm]  
Offset = TRUE  
Mod = 1  
Return = 8  
Total = 8

X = 10.65 [us]  
X = 2.18365952 [s]  
X = 45 [deg]  
X = 6 [dB]  
X = 5.325 [us]  
X = Off  
X = Off  
X = FALSE  
X = 1 [s]  
X = 50  
X = 7.18365952 [s]  
X = 19.3 [dc]

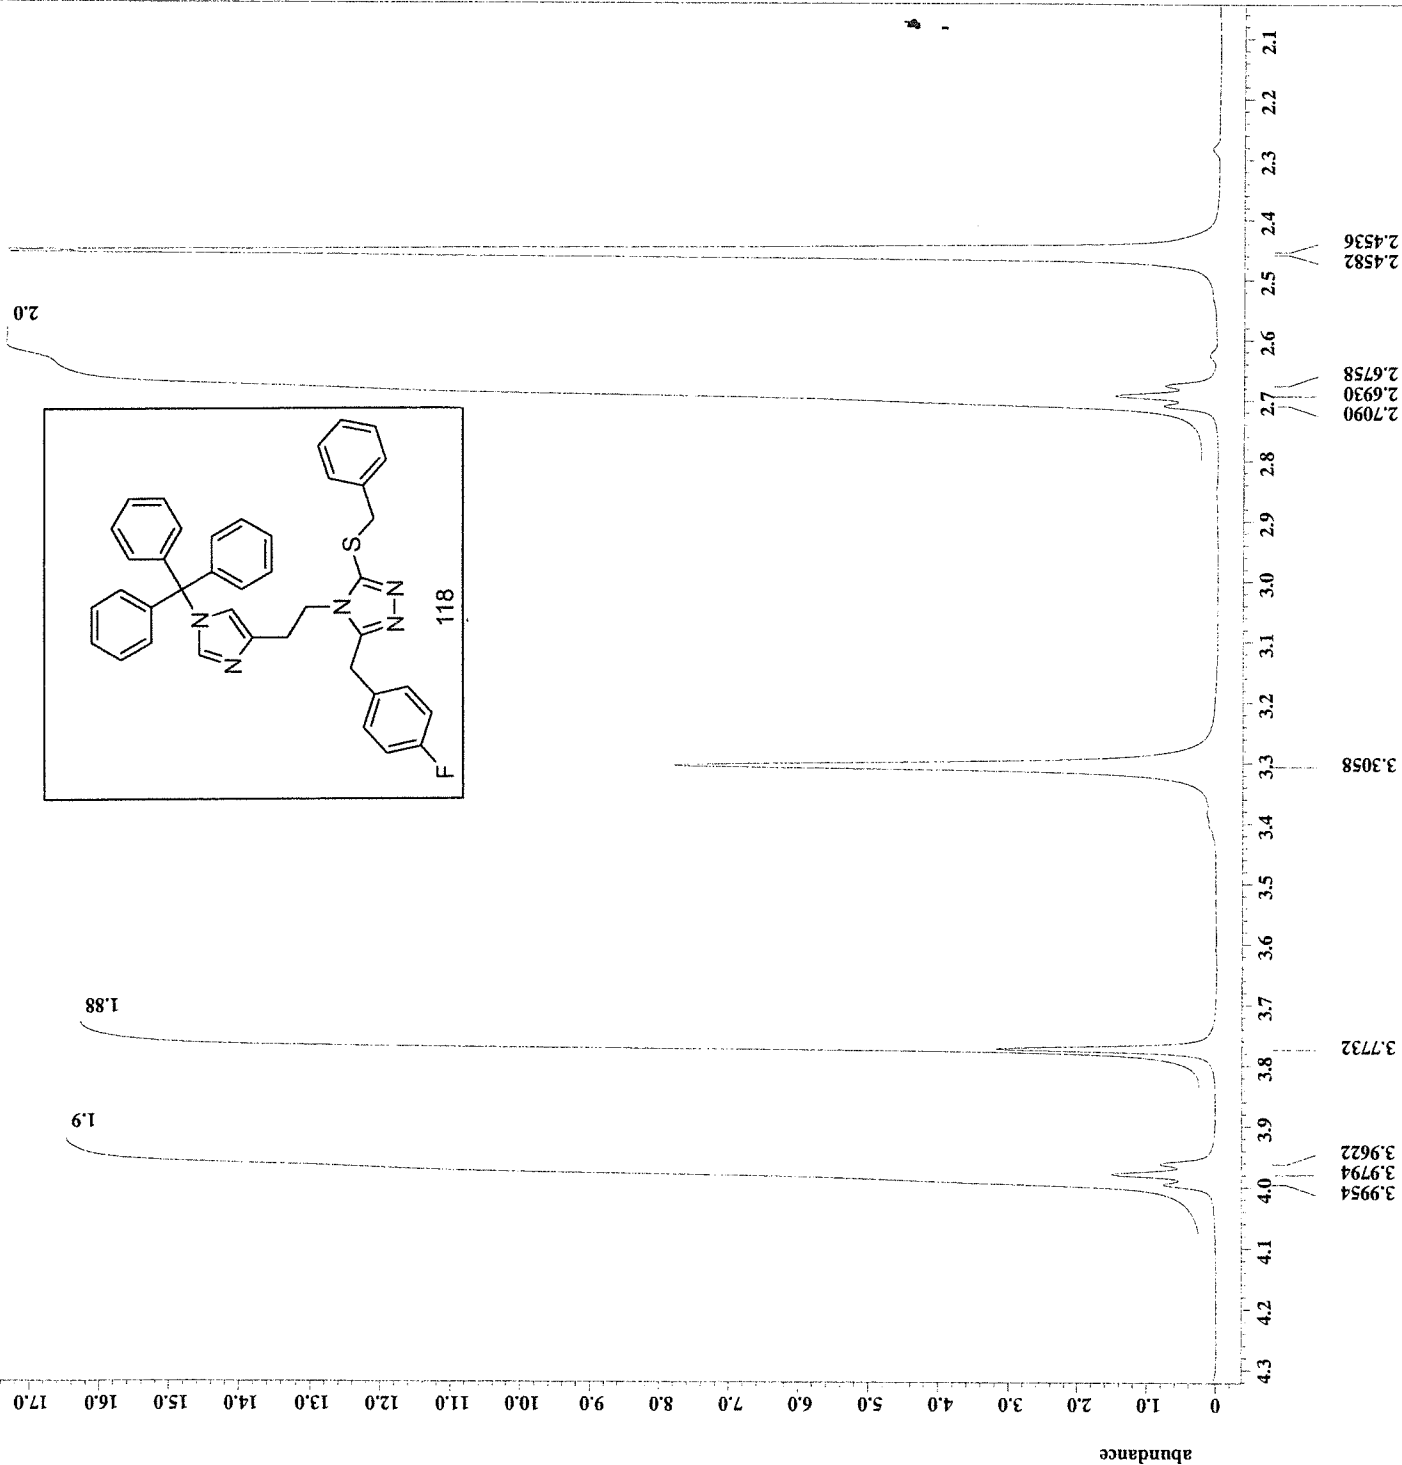

X : parts per Million : 1H

# JEOL

= XI\_18-7recrystalC0911  
= Delta  
= single\_pulse\_dec  
= XI\_18-7recrystalC0911  
= DMSO-D6  
= 11-SEP-2018 11:31:24  
= 7-MAY-2024 10:39:13  
= 7-MAY-2024 10:39:33  
= 1D COMPLEX  
= 26214  
= 13C  
= [ppm]  
= X  
= ECS 400  
= JNM-ECS400

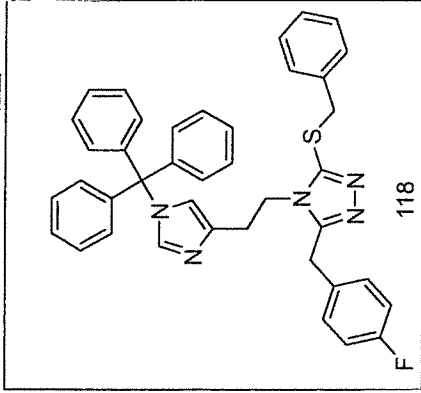

Field\_strength = 9.389766[T] (400[MHz])  
X\_acq\_duration = 1.04333312[s]  
X\_domain = 13C  
X\_freq = 100.52530333[MHz]  
X\_offset = 100[ppm]  
X\_points = 32768  
X\_prescans = 4  
X\_resolution = 0.95846665[Hz]  
X\_sweep = 31.40703518[kHz]  
Irr\_domain = 1H  
Irr\_freq = 399.78219838[MHz]  
Irr\_offset = 5[ppm]  
Mod\_return = FALSE  
Scans = 1  
Total\_scans = 3000  
X\_90\_width = 13.22[us]  
X\_acq\_time = 1.04333312[s]  
X\_angle = 30[deg]  
X\_atn = 9[db]  
X\_pulse = 4.40666667[us]  
Irr\_atn\_dec = 27[db]  
Irr\_atn\_noe = 27[db]  
Irr\_noise = WALTZ  
Decoupling = TRUE  
Initial\_wait = 1[s]  
Noe\_time = TRUE  
Noe = 2[s]  
Recvr\_gain = 60  
Relaxation\_delay = 2[s]  
Repetition\_time = 3.04333312[s]  
Temp\_get = 20[dc]

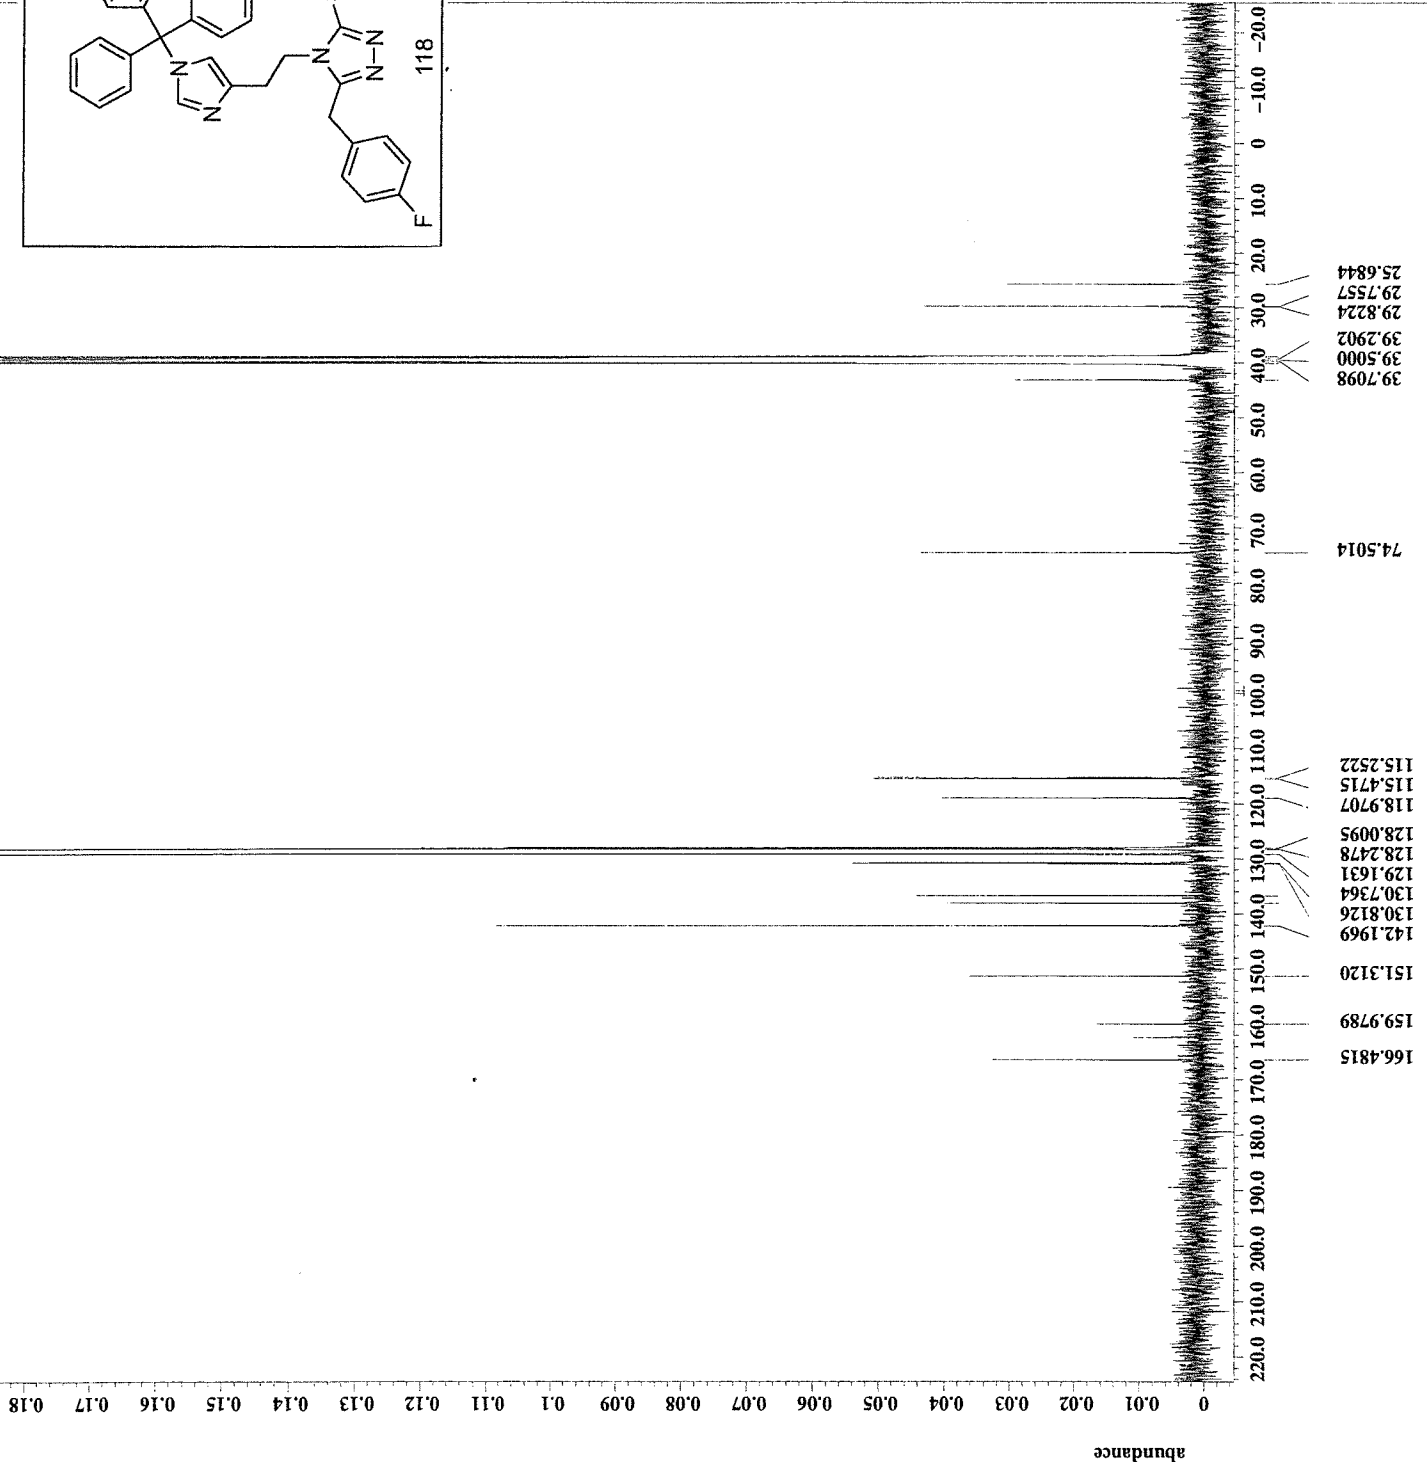

X : parts per Million : 13C

# JEOL

```

= KI_18-7recrystalC0911
= Delta
= single_pulse_dec
= KI_18-7recrystalC0911
= DMSO-D6
= 11-SEP-2018 11:31:24
= 7-MAY-2024 10:39:13
= 7-MAY-2024 10:41:17
= 1D COMPLEX
= 26214
= 13C
= [ppm]
= X
= ECS 400
= JNM-ECS400
= 9.389766[T] (400[MHz])
= 1.04333312[s]
= 13C
= 100.52530333[MHz]
= 100[ppm]
= 32768
= 4
= 0.95846665[Hz]
= 1H
= 31.40703518[kHz]
= 399.78219838[MHz]
= 5[ppm]
= FALSE
= 1
= 3000
= 3000
= 13.22[us]
= 1.04333312[s]
= 30[deg]
= 9[dB]
= 4.40666667[us]
= 27[dB]
= WALTZ
= TRUE
= 1[s]
= TRUE
= 2[s]
= 60
= 2[s]
= 3.04333312[s]
= 20[dc]
  
```

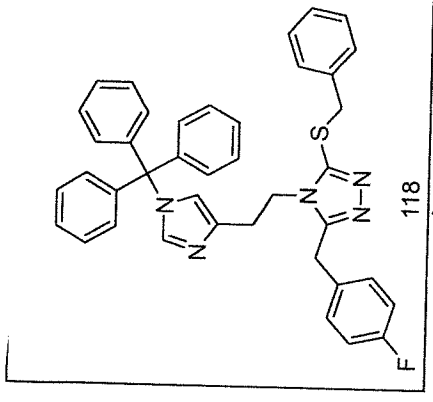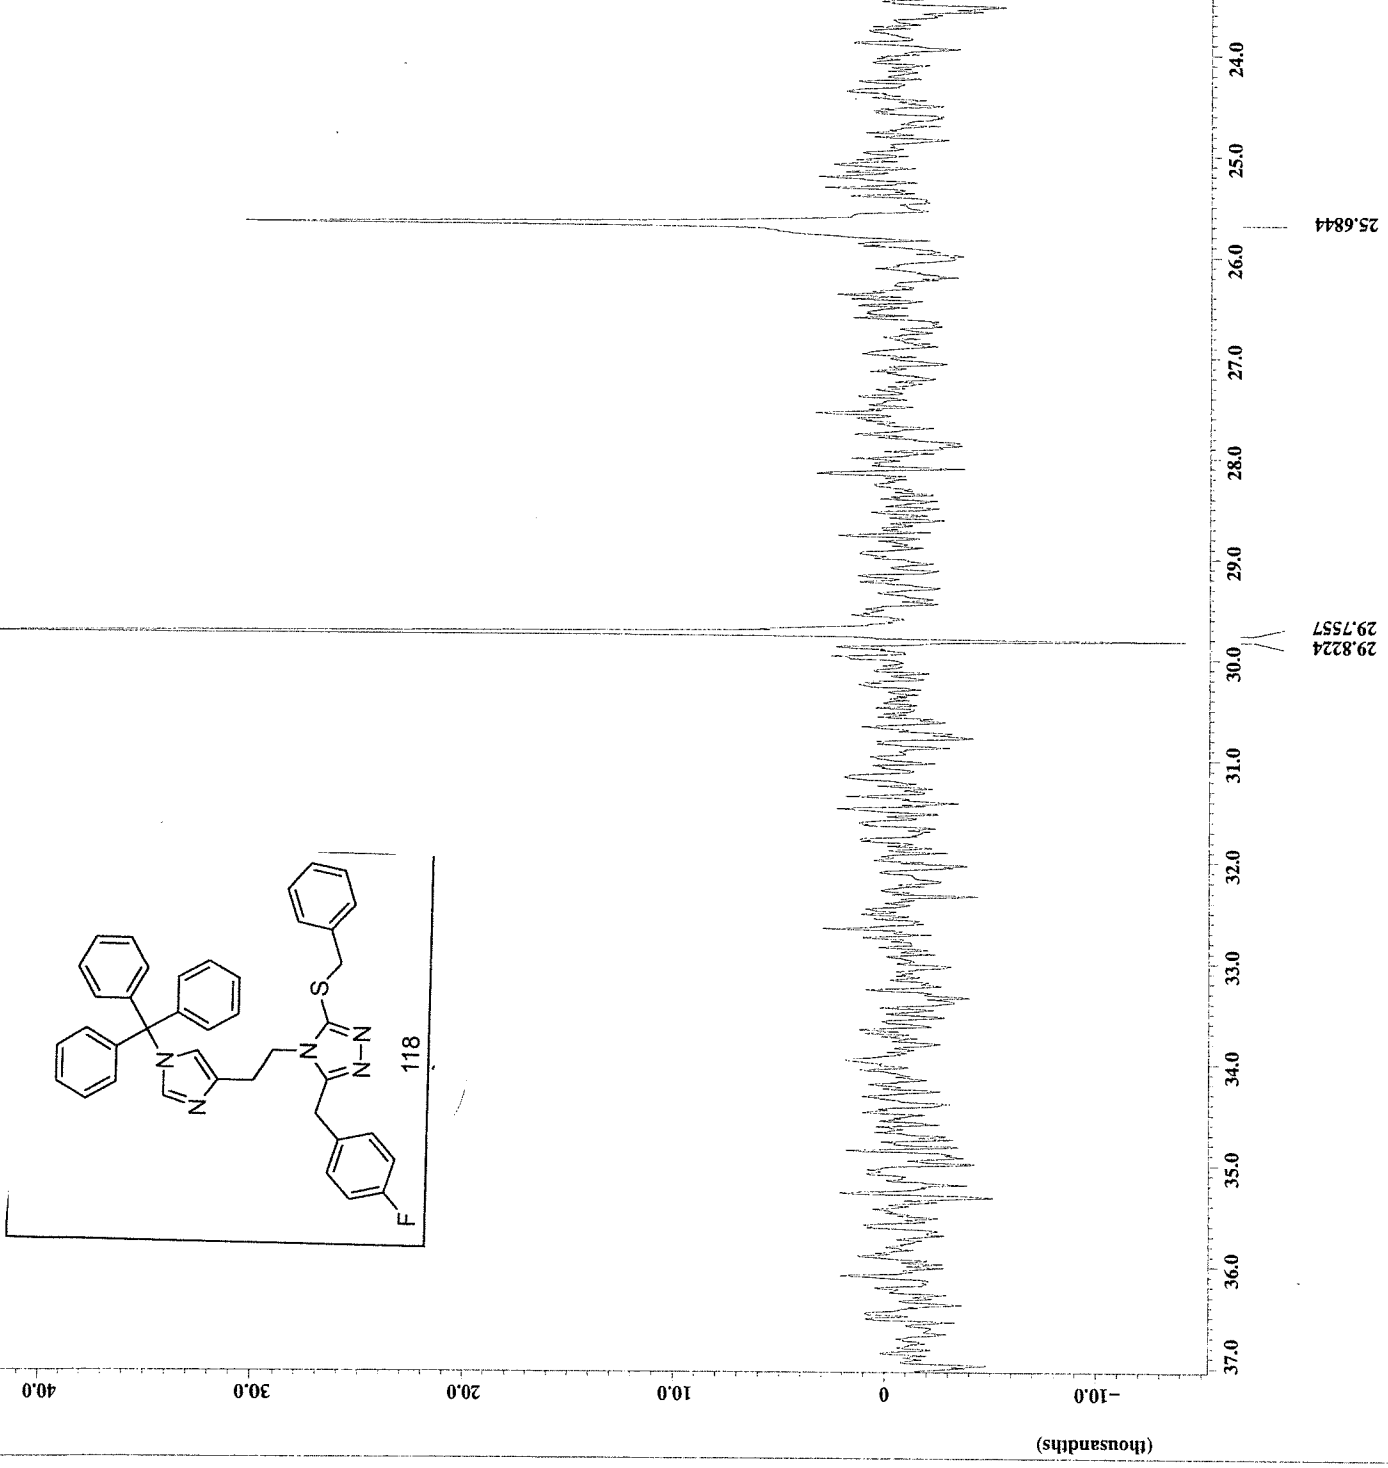

# JEOL

```

= KI_18-7recrystalC0911
= Delta
= single_pulse_dec
= KI_18-7recrystalC0911
= DMSO-D6
= 11-SEP-2018 11:31:24
= 7-MAY-2024 10:39:13
= 7-MAY-2024 10:40:56

Data format
= 1D COMPLEX
Dim_size
= 26214
Dim_title
= 13C
Dim_units
= [ppm]
Dimensions
= X
Site
= ECS 400
Spectrometer
= JNM-ECS400

Field_strength
= 9.389766[T] (400[MHz])
X_acq_duration
= 1.04333312[s]
X_domain
= 13C
X_freq
= 100.52530333[MHz]
X_offset
= 100[ppm]
X_points
= 32768
X_prescans
= 4
X_resolution
= 0.95846665[Hz]
X_sweep
= 31.40703518[KHz]
Irr_domain
= 1H
Irr_freq
= 399.78219838[MHz]
Irr_offset
= 5[ppm]
Clipped
= FALSE
Mod_return
= 1
Scans
= 3000
Total_scans
= 3000

X_90_width
= 13.22[us]
X_acq_time
= 1.04333312[s]
X_angle
= 30[deg]
X_atn
= 9[db]
X_pulse
= 4.40666667[us]
Irr_atn_dec
= 27[db]
Irr_atn_noe
= 27[db]
Irr_noise
= WALTZ
Decoupling
= TRUE
Initial_wait
= 1[s]
Noe_time
= TRUE
Noe_time
= 2[s]
Recvr_gain
= 60
Relaxation_delay
= 2[s]
Repetition_time
= 3.04333312[s]
Temp_get
= 20[dc]
  
```

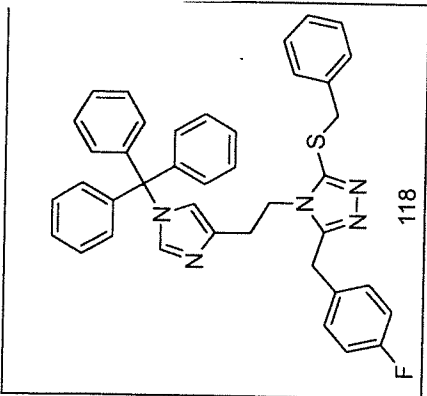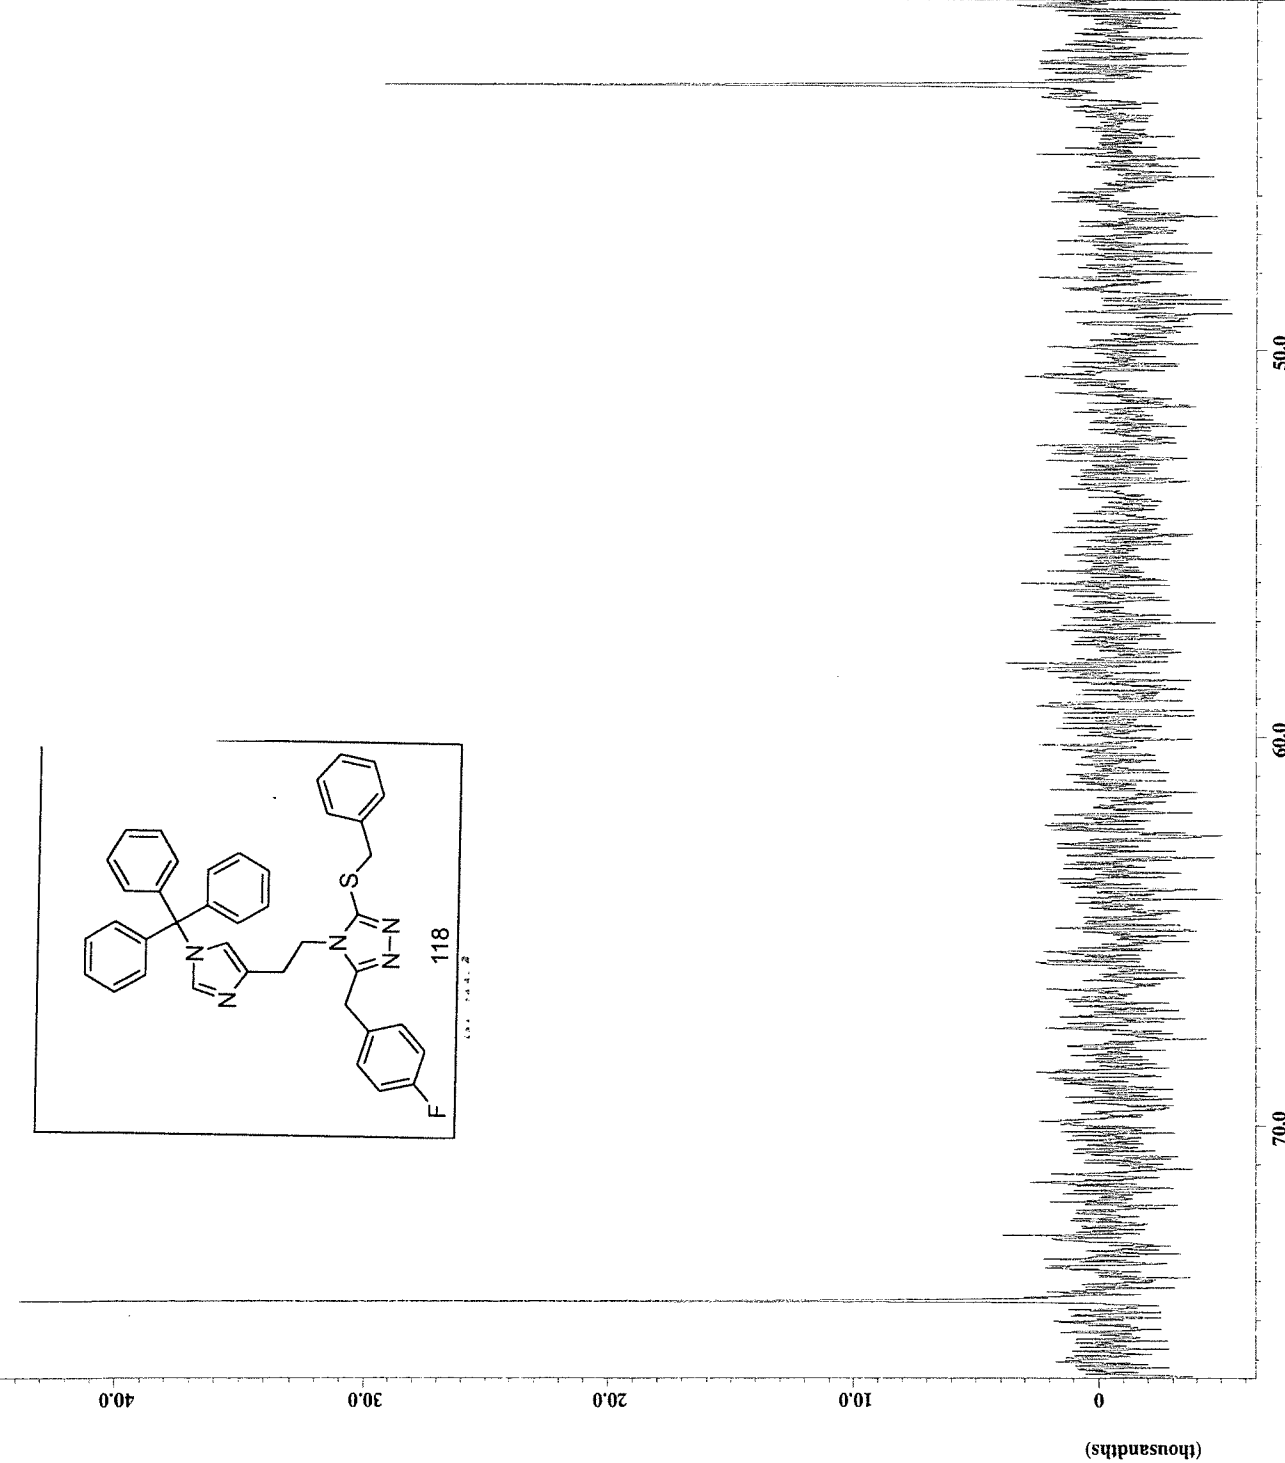

74.5014

43.1517

# AJEOL

```

= KI_18-7recrystalC0911
= Delta
= single_pulse_dec
= KI_18-7recrystalC0911
= DMSO-D6
= 11-SEP-2018 11:31:24
= 7-MAY-2024 10:39:13
= 7-MAY-2024 10:40:16
= 1D_COMPLEX
= 26214
= 13C
= [ppm]
= X
= ECS 400
= JNM-ECS400
= 9.389766[M] (400[MHz])
= 1.04333312[s]
= 13C
= 100.52530333[MHz]
= 100[ppm]
= 32768
= 4
= 0.95846665[Hz]
= 31.40703518[KHz]
= 1H
= 399.78219838[MHz]
= 5[ppm]
= FALSE
= 1
= 3000
= 3000
= 13.22[us]
= 1.04333312[s]
= 30[deg]
= 9[dB]
= 4.40666667[us]
= 27[dB]
= WALTZ
= TRUE
= 1[s]
= TRUE
= 2[s]
= 60
= 2[s]
= 3.04333312[s]
= 20[dc]
  
```

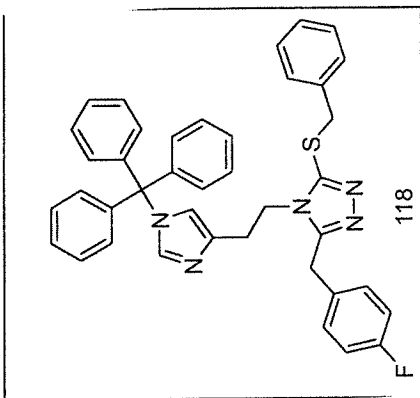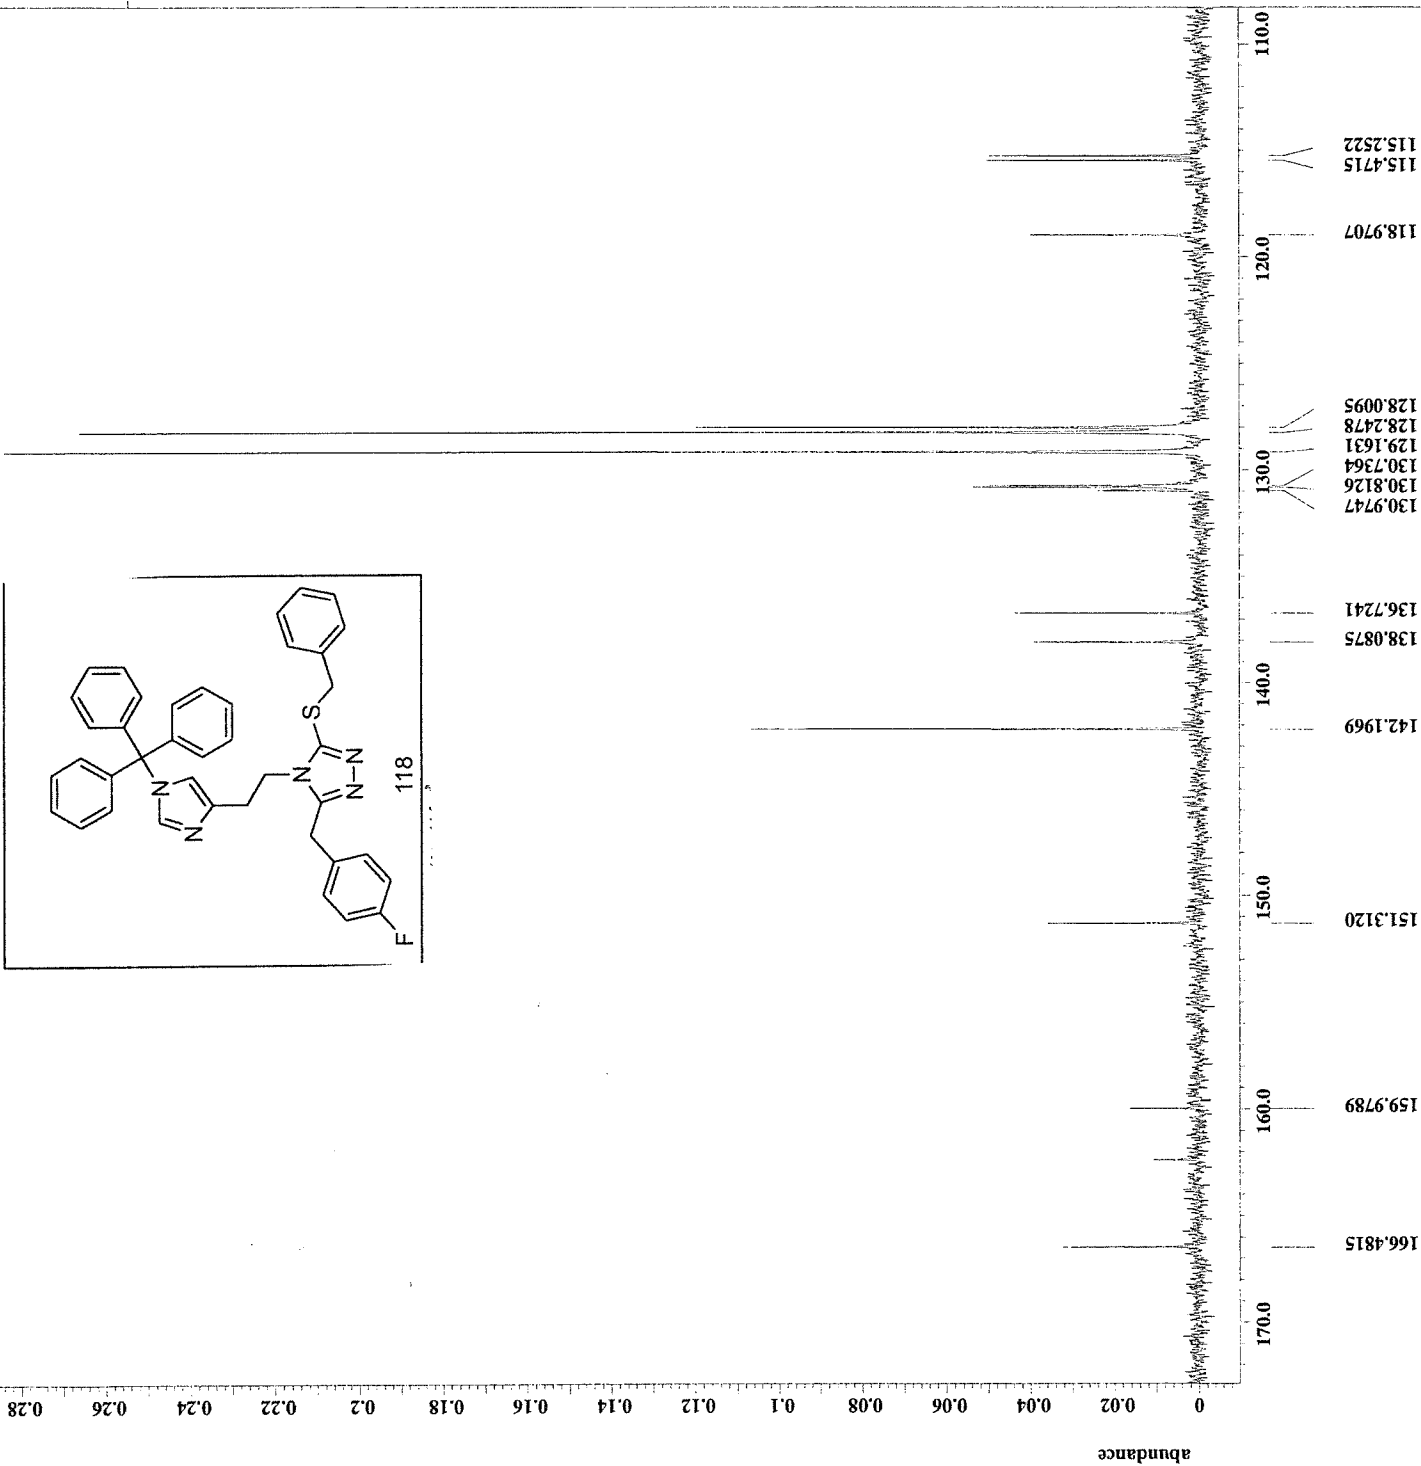

X : parts per Million : 13C

# AJEOL

```

Filename = LG-mf-SBz-4.jdf
Author = mcrider
Experiment = single_pulse.ex2
Sample_id = S#546630
Solvent = CHLOROFORM-D
Creation_time = 18-DEC-2018 13:47:00
Revision_time = 3-MAY-2024 10:59:17
Current_time = 3-MAY-2024 11:00:12

Comment = single_pulse
Data_format = 1D COMPLEX
Dim_size = 13107
Dim_title = 1H
Dim_units = [ppm]
Dimensions = X
Site = ECS 400
Spectrometer = JNM-ECS400

Field_strength = 9.389766[Ti] (400[MHz])
X_acq_duration = 2.18365952[s]
X_domain = 1H
X_freq = 399.78219838[MHz]
X_offset = 5[ppm]
X_points = 16384
X_prescans = 1
X_resolution = 0.45794685[Hz]
X_sweep = 7.5030012[KHz]
Irr_domain = 1H
Irr_freq = 399.78219838[MHz]
Irr_offset = 5[ppm]
Tri_domain = 1H
Tri_freq = 399.78219838[MHz]
Tri_offset = 5[ppm]
Clipped = TRUE
Mod_return = 1
Scans = 8
Total_scans = 8

X_90_width = 11.365[us]
X_acq_time = 2.18365952[s]
X_angle = 45[deg]
X_atn = 6[dB]
X_pulse = 5.6825[us]
Irr_mode = Off
Tri_mode = Off
Dante_presat = FALSE
Initial_wait = 1[s]
Recvr_gain = 50
Relaxation_delay = 5[s]
Repetition_time = 7.18365952[s]
Temp_get = 19[dc]
  
```

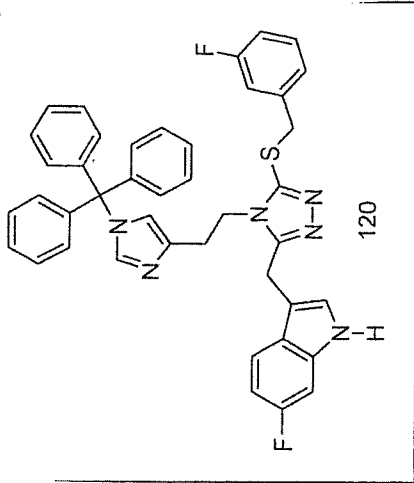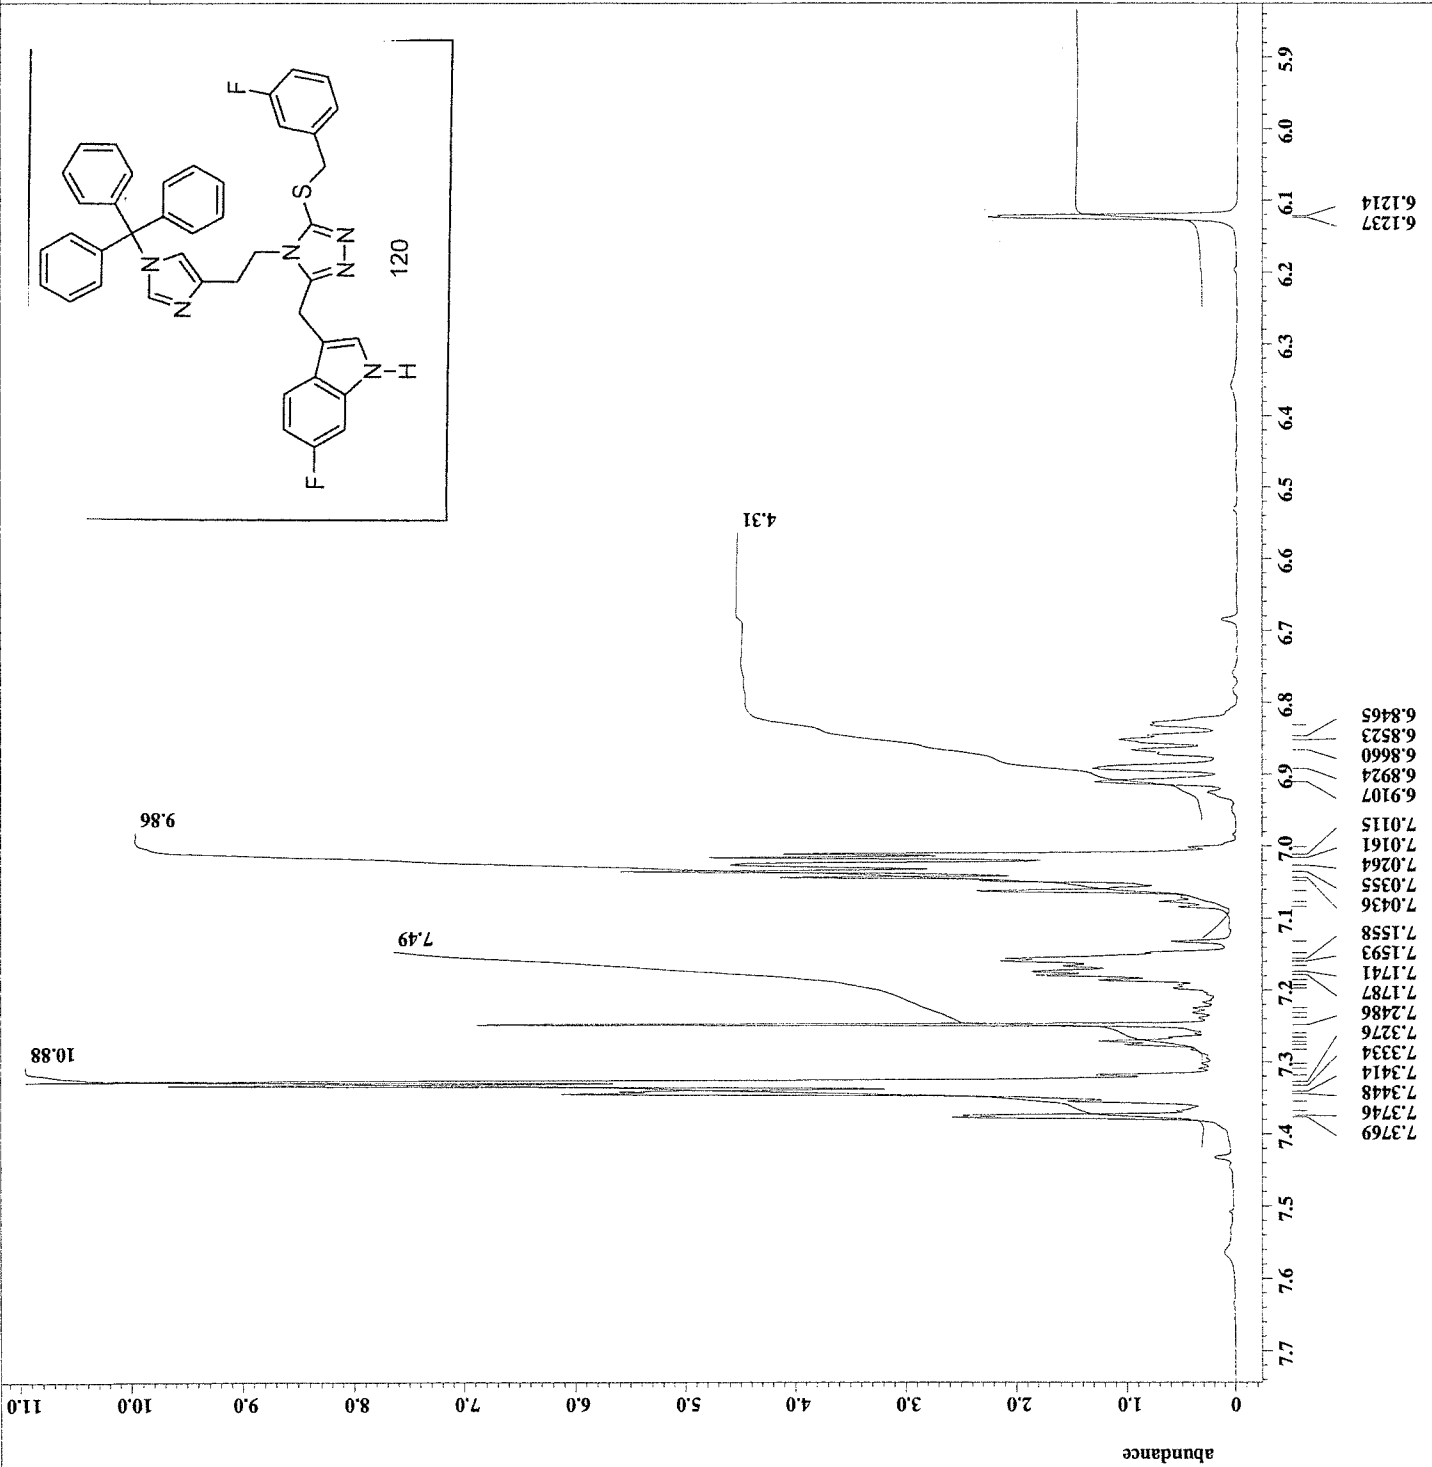



# AJEOL

```

= LG-mf-SBz-4.jdf
= mcrider
= single_pulse.ex2
= S#546630
= CHLOROFORM-D
= 18-DEC-2018 13:47:00
= 3-MAY-2024 10:59:17
= 3-MAY-2024 10:59:23
= single_pulse
= 1D COMPLEX
= 13107
= 1H
= [ppm]
= X
= ECS 400
= JNM-ECS400
= 9.389766[T] (400[MHz])
= 2.18365952[s]
= 1H
= 399.78219838[MHz]
= 5[ppm]
= 16384
= 1
= 0.45794685[Hz]
= 7.5030012[kHz]
= 1H
= 399.78219838[MHz]
= 5[ppm]
= 1H
= 399.78219838[MHz]
= 5[ppm]
= TRUE
= 1
= 8
= 11.365[us]
= 2.18365952[s]
= 45[deg]
= 6[db]
= 5.6825[us]
= Off
= Off
= FALSE
= 1[s]
= 50
= 5[s]
= 7.18365952[s]
= 19[dc]
  
```

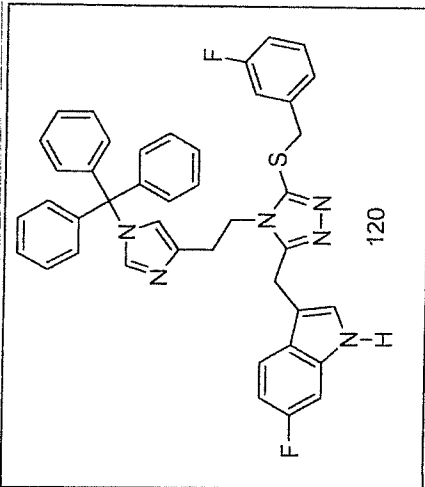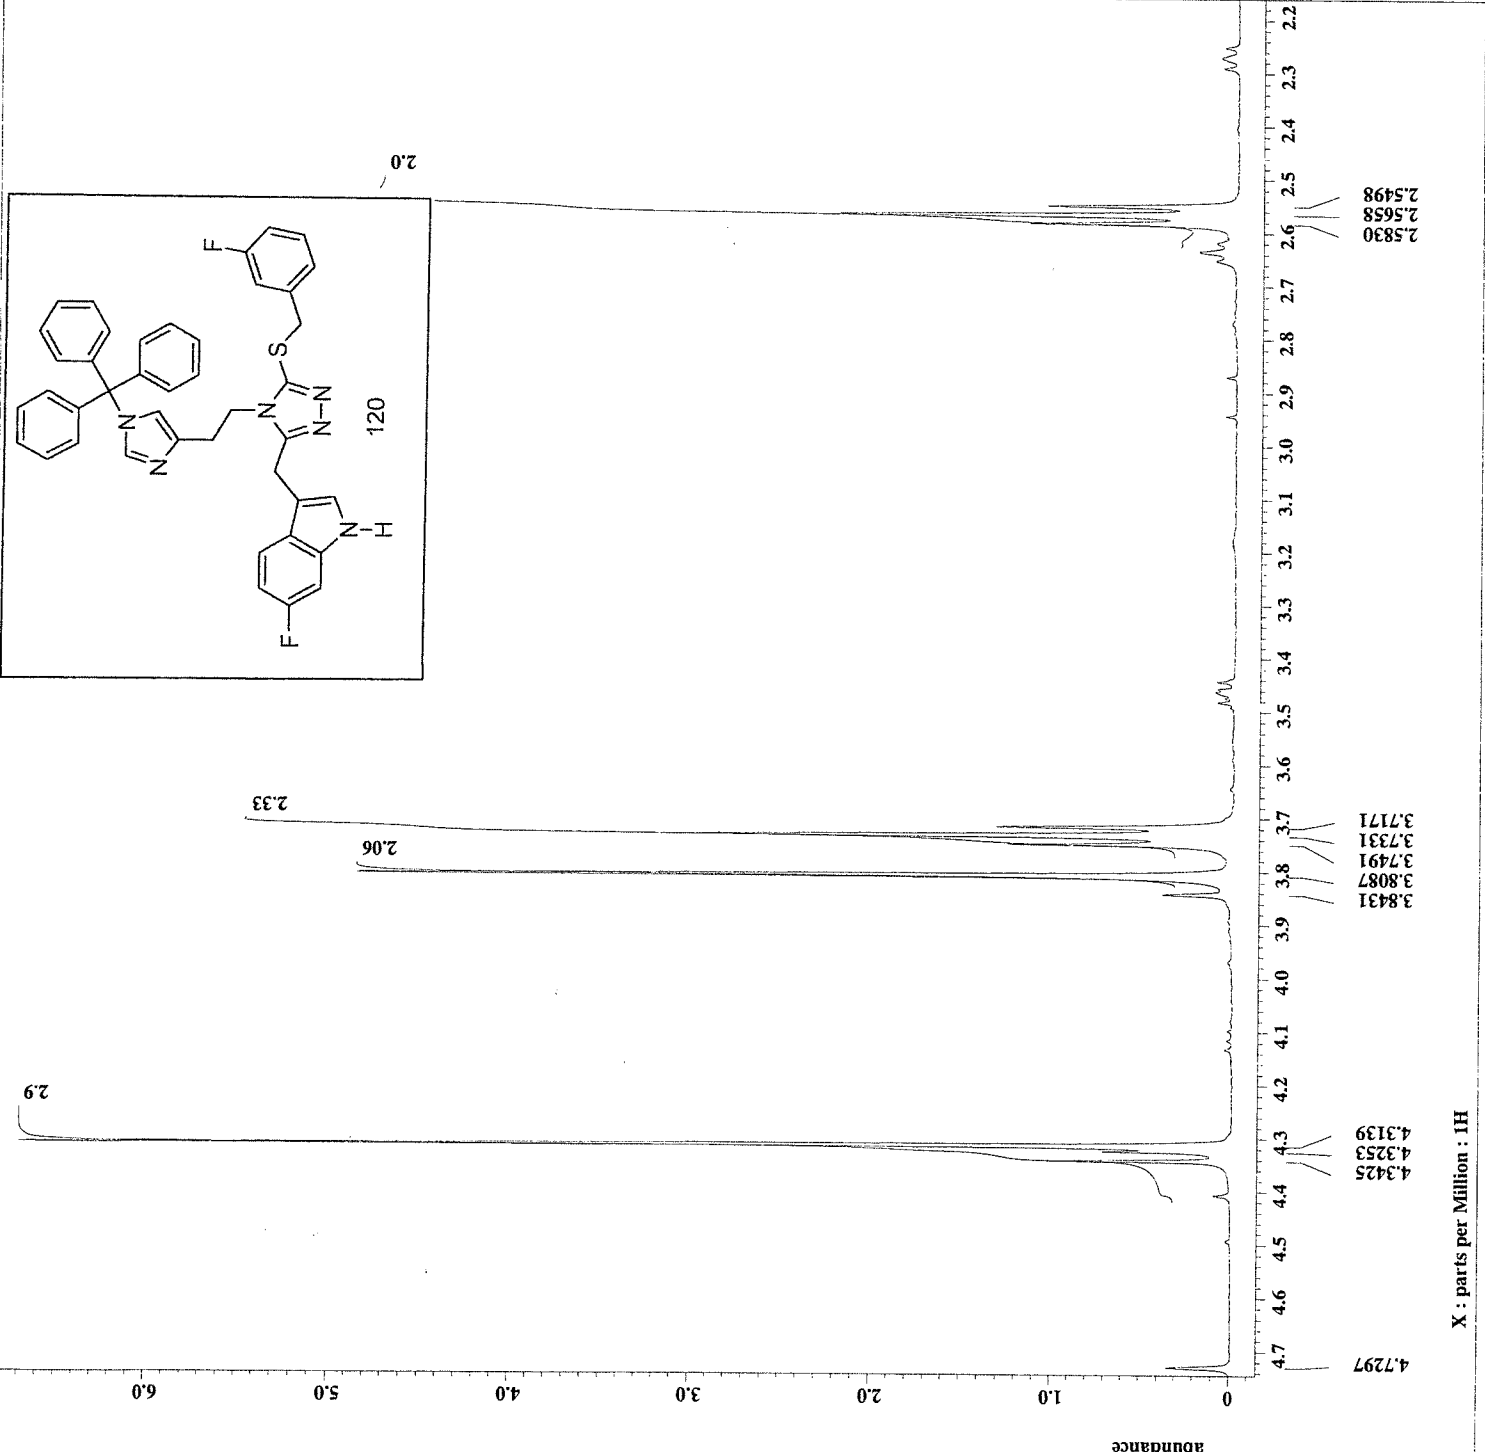

X : parts per Million : 1H

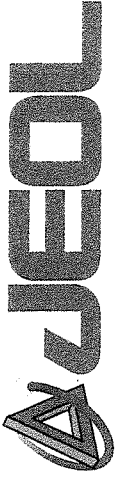

Filename = LG-I-65-1\_CARBON-4.jd  
Author = Delta  
Experiment = single\_pulse\_dec  
Sample\_id = LG-I-65-1  
Solvent = DMSO-D6  
Creation\_time = 17-SEP-2019 01:12:54  
Revision\_time = 6-MAY-2024 14:25:44  
Current\_time = 6-MAY-2024 14:26:17  
Data\_format = 1D COMPLEX  
Dim\_size = 26214  
Dim\_title = 13C  
Dim\_units = [ppm]  
Dimensions = X  
Site = ECS 400  
Spectrometer = JNM-ECS400  
Field\_strength = 9.389766[T] (400[MHz])  
X\_acq\_duration = 1.04333312[s]  
X\_domain = 13C  
X\_freq = 100.52530333[MHz]  
X\_offset = 100[ppm]  
X\_points = 32768  
X\_prescans = 4  
X\_resolution = 0.95846665[Hz]  
X\_sweep = 31.40703518[MHz]  
Irr\_domain = 1H  
Irr\_freq = 399.78219838[MHz]  
Irr\_offset = 5[ppm]  
Clipped = FALSE  
Mod\_return = 1  
Scans = 12000  
Total\_scans = 12000  
X\_90\_width = 10.466[us]  
X\_acq\_time = 1.04333312[s]  
X\_angle = 30[deg]  
X\_atn = 10.3[dB]  
X\_pulse = 3.48866667[us]  
Irr\_atn\_dec = 24[dB]  
Irr\_atn\_noe = 24[dB]  
Irr\_noise = WALTZ  
Decoupling = TRUE  
Initial\_wait = 1[s]  
Noe = TRUE  
Noe\_time = 2[s]  
Recvr\_gain = 60  
Relaxation\_delay = 2[s]  
Repetition\_time = 3.04333312[s]  
Temp\_get = 21[degC]

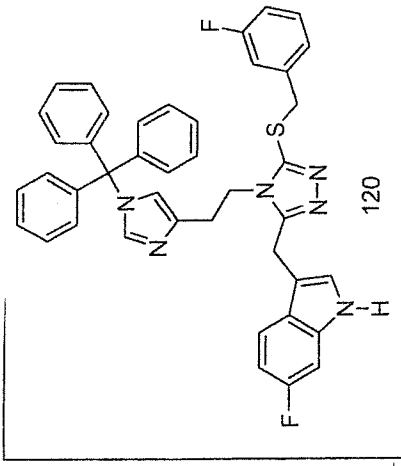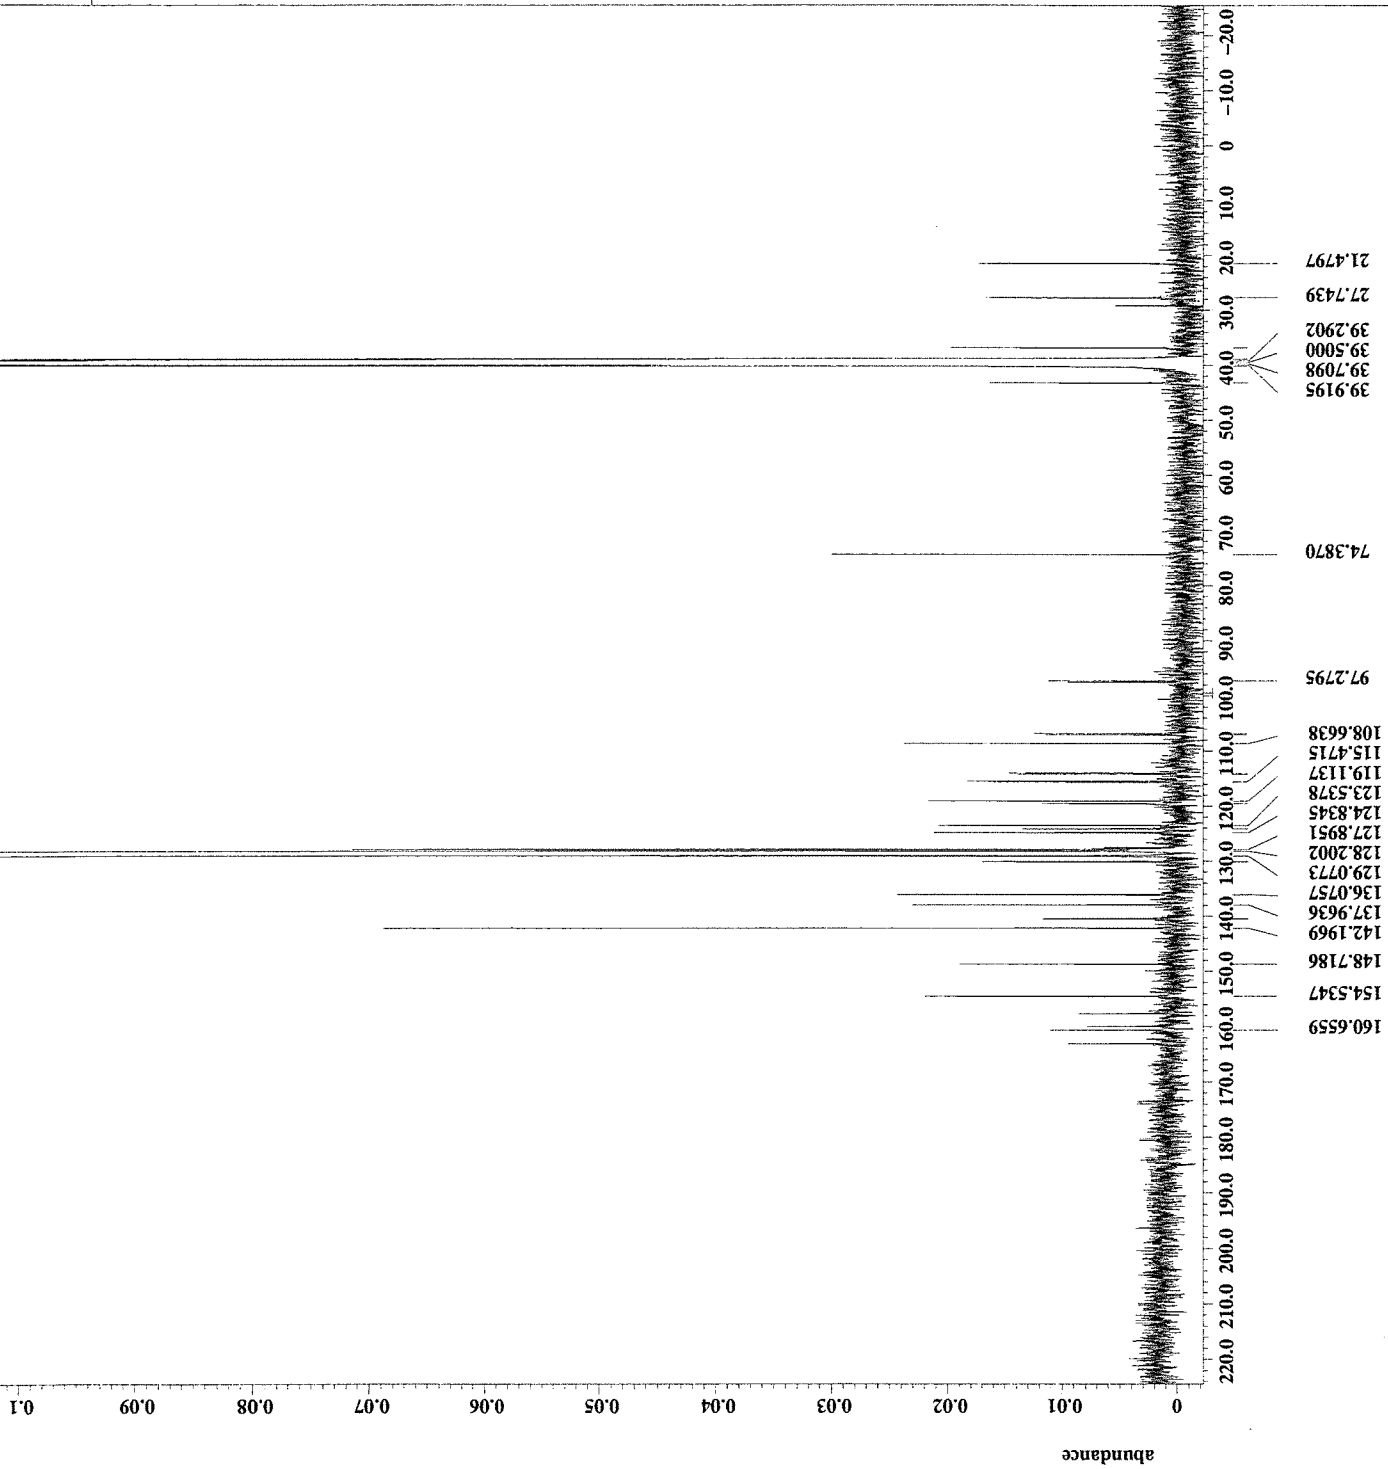

X : parts per Million : 13C

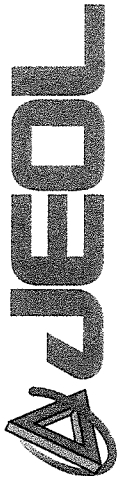

Filename = KI-6Findole-S-3MeBz\_C  
Author = mcrider  
Experiment = single\_pulse\_dec  
Sample\_id = KI-6Findole-S-3MeBz  
Solvent = DMSO-D6  
Creation\_time = 3-APR-2019 20:24:27  
Revision\_time = 7-MAY-2024 10:32:43  
Current\_time = 7-MAY-2024 10:33:12  
Data\_format = 1D\_COMPLEX  
Dim\_size = 26214  
Dim\_title = 13C  
Dim\_units = [ppm]  
Dimensions = X  
Site = ECS 400  
Spectrometer = JNM-ECS400  
Field\_strength = 9.389766[T] (400 [MHz])  
X\_acq\_duration = 1.04333312[s]  
X\_domain = 13C  
X\_freq = 100.52530333 [MHz]  
X\_offset = 100 [ppm]  
X\_points = 32768  
X\_prescans = 4  
X\_resolution = 0.95846665 [Hz]  
X\_sweep = 31.40703518 [kHz]  
Irr\_domain = 1H  
Irr\_freq = 399.78219838 [MHz]  
Irr\_offset = 5 [ppm]  
Clipped = TRUE  
Mod\_return = 1  
Scans = 10000  
Total\_scans = 10000  
X\_90\_width = 10.4 [us]  
X\_acq\_time = 1.04333312 [s]  
X\_angle = 30 [deg]  
X\_atn = 9 [dB]  
X\_pulse = 3.46666667 [us]  
Irr\_atn\_dec = 24.2 [dB]  
Irr\_atn\_noe = 24.2 [dB]  
Irr\_noise = WALTZ  
Decoupling = TRUE  
Initial\_wait = 1 [s]  
Noe\_time = TRUE  
Noe = 21eJ  
Recvr\_gain = 60  
Relaxation\_delay = 2 [s]  
Repetition\_time = 3.04333312 [s]  
=====

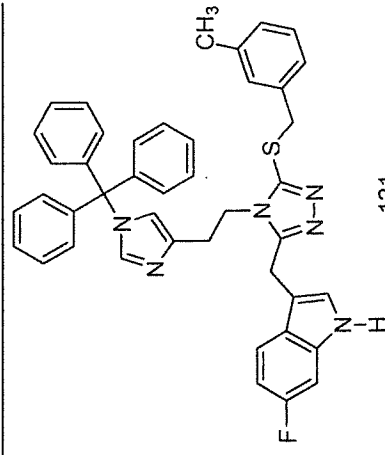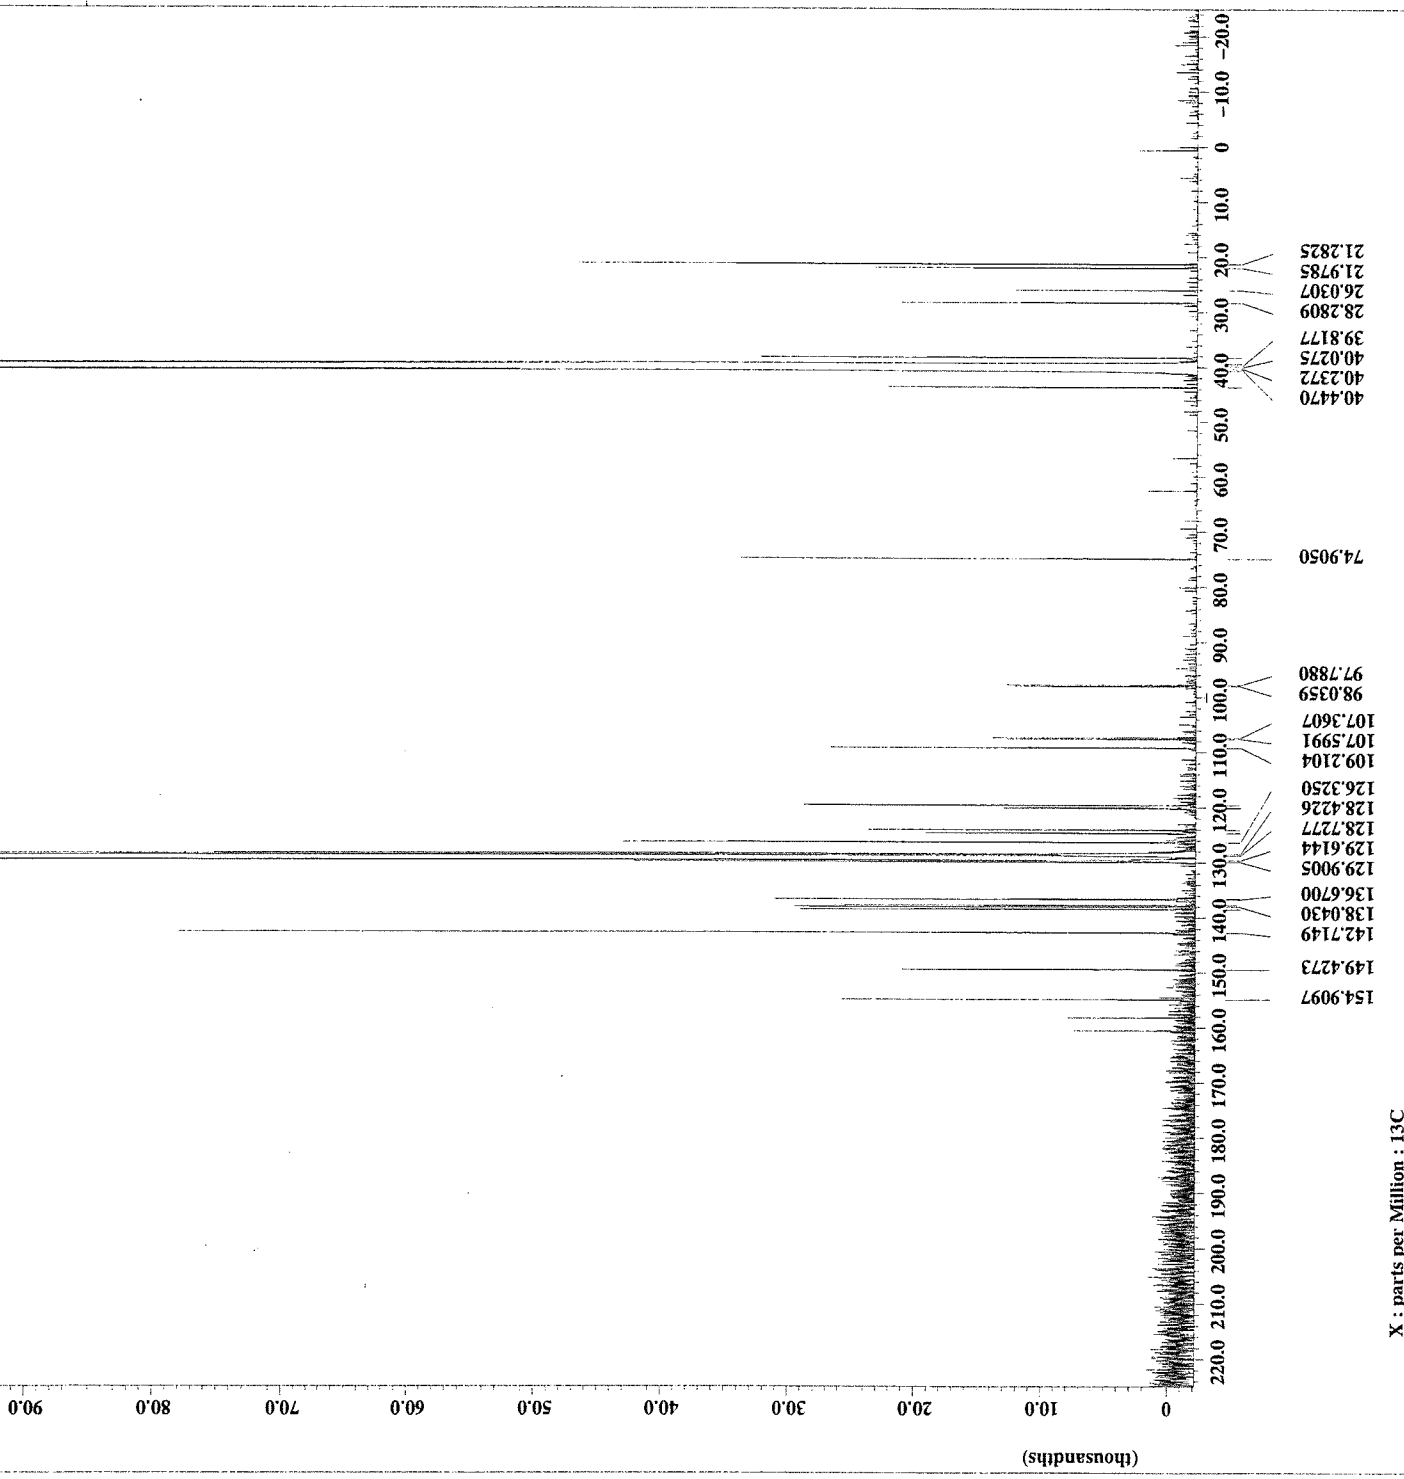

X : parts per Million : 13C

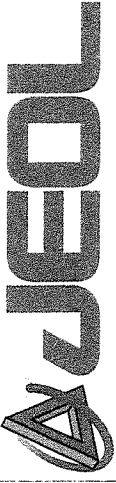

File name = KI-6Findole-S-3MeBz\_C  
Author = mcridder  
Experiment = single\_pulse\_dec  
Sample\_id = KI-6Findole-S-3MeBz  
Solvent = DMSO-D6  
Creation time = 3-APR-2019 20:24:27  
Revision time = 7-MAY-2024 10:32:43  
Current\_time = 7-MAY-2024 10:33:42  
Data format = 1D COMPLEX  
Dim\_size = 26214  
Dim\_title = 13C  
Dim\_units = [ppm]  
Dimensions = X  
Site = ECS 400  
Spectrometer = JNM-ECS400  
Field\_strength = 9.389766 [T] (400 [MHz])  
X\_acq\_duration = 1.04333312 [s]  
X\_acmain = 13C  
X\_freq = 100.52530333 [MHz]  
X\_offset = 100 [ppm]  
X\_points = 32768  
X\_prescans = 4  
X\_resolution = 0.95846665 [Hz]  
X\_sweep = 31.40703518 [kHz]  
Irr\_domain = 1H  
Irr\_freq = 399.78219838 [MHz]  
Irr\_offset = 5 [ppm]  
Clipped = TRUE  
Mod\_return = 1  
Scans = 10000  
Total\_scans = 10000  
X\_90\_width = 10.4 [us]  
X\_acq\_time = 1.04333312 [s]  
X\_angle = 30 [deg]  
X\_atn = 9 [dB]  
X\_pulse = 3.46666667 [us]  
Irr\_atn\_dec = 24.2 [dB]  
Irr\_atn\_noe = 24.2 [dB]  
Irr\_noise = WALTZ  
Decoupling = TRUE  
Initial\_wait = 1 [s]  
Noe = TRUE  
Noe\_time = 2 [s]  
Recvr\_gain = 60  
Relaxation\_delay = 2 [s]  
Repetition\_time = 3.04333312 [s]  
Temp\_get = 20.6 [dC]

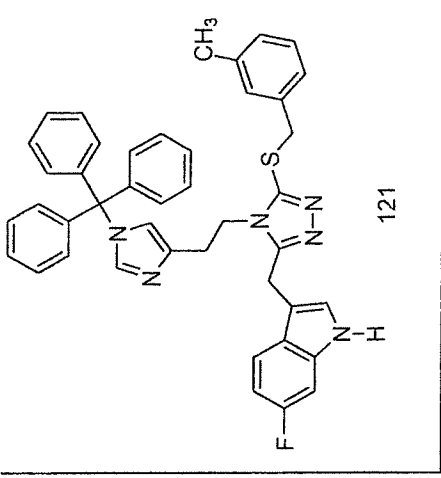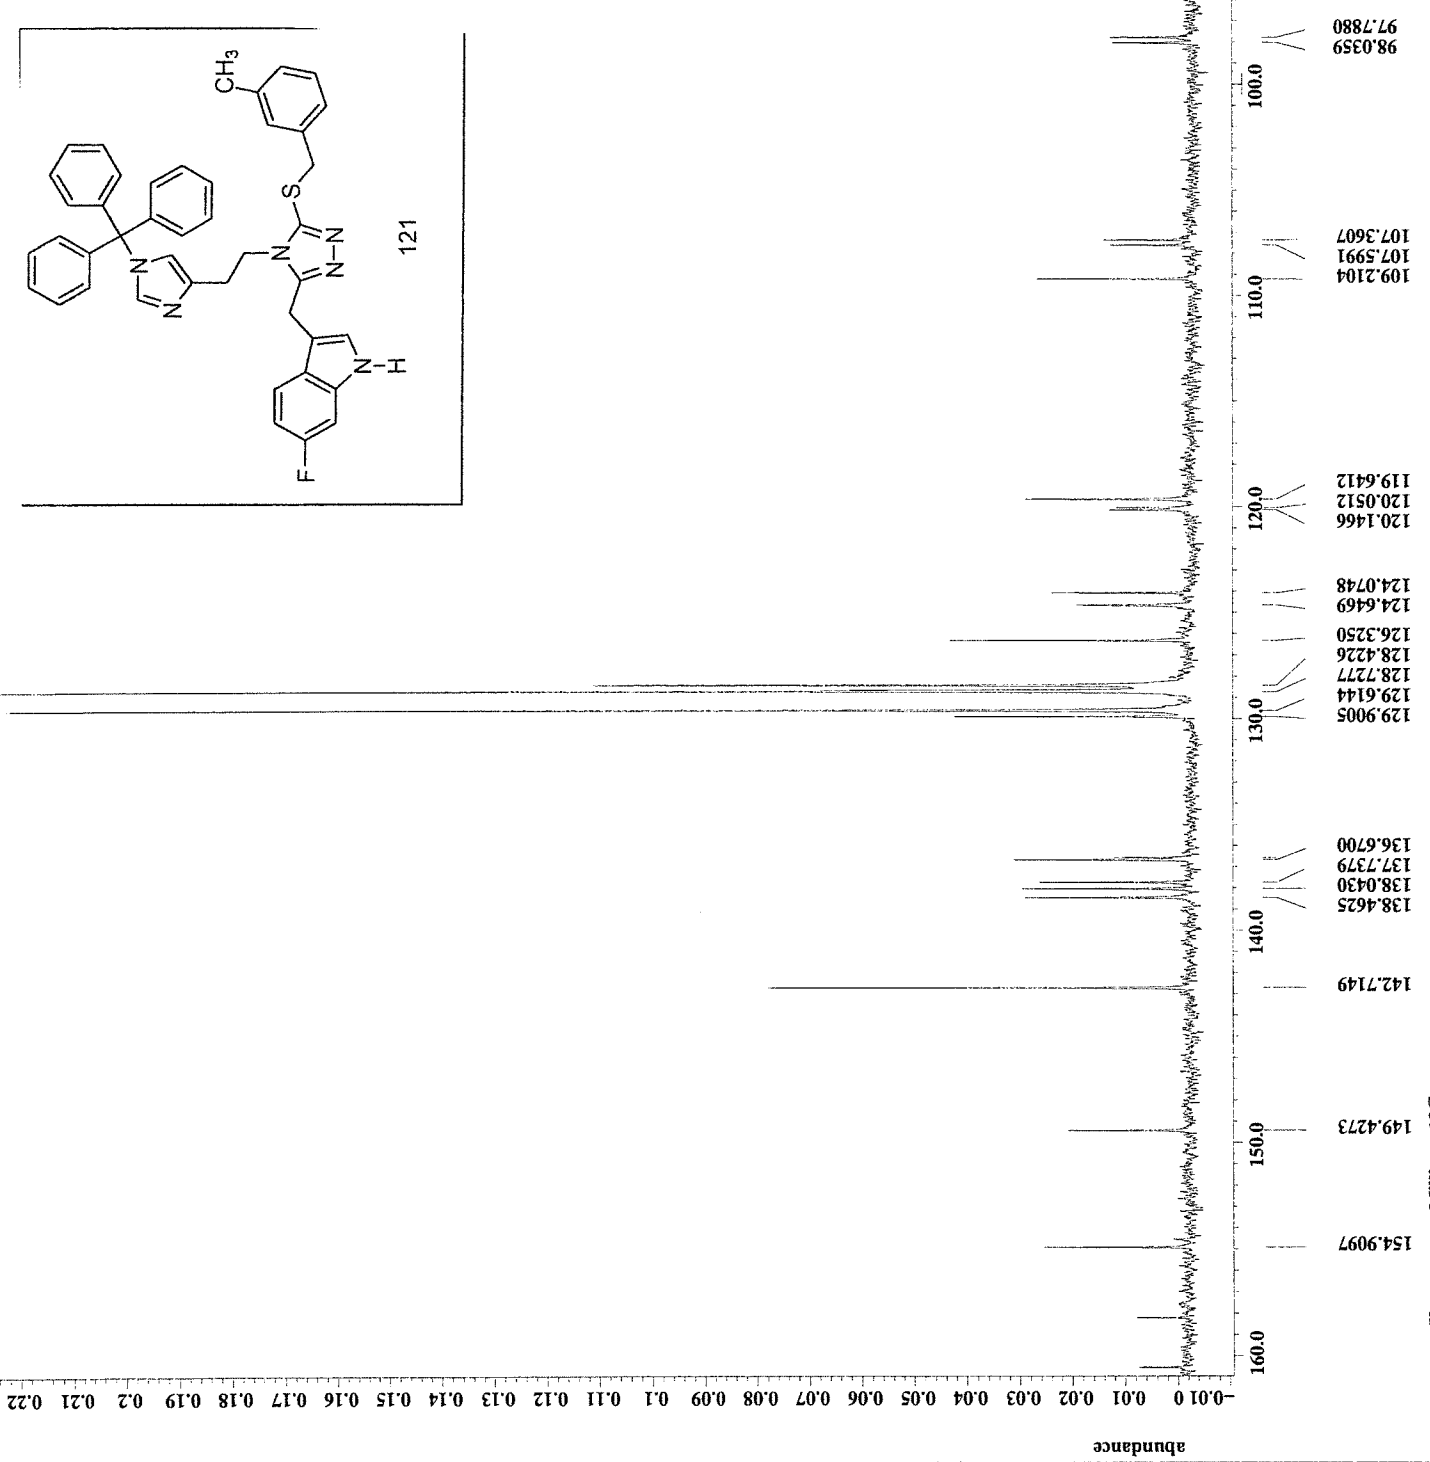

X : parts per Million : 13C

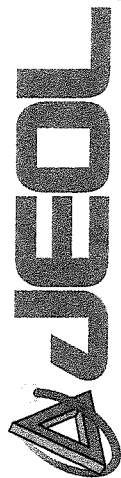

= AMC-S2-56A-4.jdf  
 = mcrider  
 = single\_pulse.ex2  
 = S#358446  
 = DMSO-D6  
 = 9-JUN-2018 08:48:55  
 = 13-MAY-2024 14:17:56  
 = 13-MAY-2024 14:18:26  
 = single\_pulse  
 = 1D COMPLEX  
 = 13107  
 = 1H  
 = [ppm]  
 = X  
 = ECS 400  
 = JNM-ECS400

= 9.389766[T] (400 [MHz])  
 = 2.18365952[s]  
 = 1H  
 = 399.78219838 [MHz]  
 = 5 [ppm]  
 = 16384  
 = 1  
 = 0.45794685 [Hz]  
 = 7.5030012 [kHz]  
 = 1H  
 = 399.78219838 [MHz]  
 = 5 [ppm]  
 = 1H  
 = 399.78219838 [MHz]  
 = 5 [ppm]  
 = TRUE  
 = 1  
 = 8  
 = 8  
 = 10.65 [us]  
 = 2.18365952 [s]  
 = 45 [deg]  
 = 6 [dB]  
 = 5.325 [us]  
 = Off  
 = Off  
 = FALSE  
 = 1 [s]  
 = 50  
 = 5 [s]  
 = 7.18365952 [s]  
 = 20 [dc]

= 9.389766 [T] (400 [MHz])  
 = 2.18365952 [s]  
 = 1H  
 = 399.78219838 [MHz]  
 = 5 [ppm]  
 = 16384  
 = 1  
 = 0.45794685 [Hz]  
 = 7.5030012 [kHz]  
 = 1H  
 = 399.78219838 [MHz]  
 = 5 [ppm]  
 = 1H  
 = 399.78219838 [MHz]  
 = 5 [ppm]  
 = TRUE  
 = 1  
 = 8  
 = 8  
 = 10.65 [us]  
 = 2.18365952 [s]  
 = 45 [deg]  
 = 6 [dB]  
 = 5.325 [us]  
 = Off  
 = Off  
 = FALSE  
 = 1 [s]  
 = 50  
 = 5 [s]  
 = 7.18365952 [s]  
 = 20 [dc]

= 9.389766 [T] (400 [MHz])  
 = 2.18365952 [s]  
 = 1H  
 = 399.78219838 [MHz]  
 = 5 [ppm]  
 = 16384  
 = 1  
 = 0.45794685 [Hz]  
 = 7.5030012 [kHz]  
 = 1H  
 = 399.78219838 [MHz]  
 = 5 [ppm]  
 = 1H  
 = 399.78219838 [MHz]  
 = 5 [ppm]  
 = TRUE  
 = 1  
 = 8  
 = 8  
 = 10.65 [us]  
 = 2.18365952 [s]  
 = 45 [deg]  
 = 6 [dB]  
 = 5.325 [us]  
 = Off  
 = Off  
 = FALSE  
 = 1 [s]  
 = 50  
 = 5 [s]  
 = 7.18365952 [s]  
 = 20 [dc]

= 9.389766 [T] (400 [MHz])  
 = 2.18365952 [s]  
 = 1H  
 = 399.78219838 [MHz]  
 = 5 [ppm]  
 = 16384  
 = 1  
 = 0.45794685 [Hz]  
 = 7.5030012 [kHz]  
 = 1H  
 = 399.78219838 [MHz]  
 = 5 [ppm]  
 = 1H  
 = 399.78219838 [MHz]  
 = 5 [ppm]  
 = TRUE  
 = 1  
 = 8  
 = 8  
 = 10.65 [us]  
 = 2.18365952 [s]  
 = 45 [deg]  
 = 6 [dB]  
 = 5.325 [us]  
 = Off  
 = Off  
 = FALSE  
 = 1 [s]  
 = 50  
 = 5 [s]  
 = 7.18365952 [s]  
 = 20 [dc]

= 9.389766 [T] (400 [MHz])  
 = 2.18365952 [s]  
 = 1H  
 = 399.78219838 [MHz]  
 = 5 [ppm]  
 = 16384  
 = 1  
 = 0.45794685 [Hz]  
 = 7.5030012 [kHz]  
 = 1H  
 = 399.78219838 [MHz]  
 = 5 [ppm]  
 = 1H  
 = 399.78219838 [MHz]  
 = 5 [ppm]  
 = TRUE  
 = 1  
 = 8  
 = 8  
 = 10.65 [us]  
 = 2.18365952 [s]  
 = 45 [deg]  
 = 6 [dB]  
 = 5.325 [us]  
 = Off  
 = Off  
 = FALSE  
 = 1 [s]  
 = 50  
 = 5 [s]  
 = 7.18365952 [s]  
 = 20 [dc]

= 9.389766 [T] (400 [MHz])  
 = 2.18365952 [s]  
 = 1H  
 = 399.78219838 [MHz]  
 = 5 [ppm]  
 = 16384  
 = 1  
 = 0.45794685 [Hz]  
 = 7.5030012 [kHz]  
 = 1H  
 = 399.78219838 [MHz]  
 = 5 [ppm]  
 = 1H  
 = 399.78219838 [MHz]  
 = 5 [ppm]  
 = TRUE  
 = 1  
 = 8  
 = 8  
 = 10.65 [us]  
 = 2.18365952 [s]  
 = 45 [deg]  
 = 6 [dB]  
 = 5.325 [us]  
 = Off  
 = Off  
 = FALSE  
 = 1 [s]  
 = 50  
 = 5 [s]  
 = 7.18365952 [s]  
 = 20 [dc]

= 9.389766 [T] (400 [MHz])  
 = 2.18365952 [s]  
 = 1H  
 = 399.78219838 [MHz]  
 = 5 [ppm]  
 = 16384  
 = 1  
 = 0.45794685 [Hz]  
 = 7.5030012 [kHz]  
 = 1H  
 = 399.78219838 [MHz]  
 = 5 [ppm]  
 = 1H  
 = 399.78219838 [MHz]  
 = 5 [ppm]  
 = TRUE  
 = 1  
 = 8  
 = 8  
 = 10.65 [us]  
 = 2.18365952 [s]  
 = 45 [deg]  
 = 6 [dB]  
 = 5.325 [us]  
 = Off  
 = Off  
 = FALSE  
 = 1 [s]  
 = 50  
 = 5 [s]  
 = 7.18365952 [s]  
 = 20 [dc]

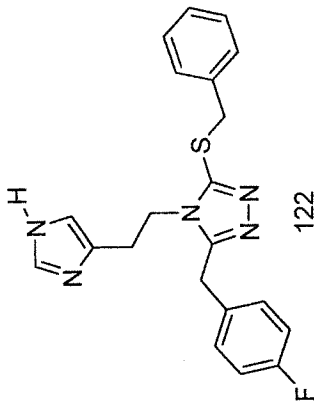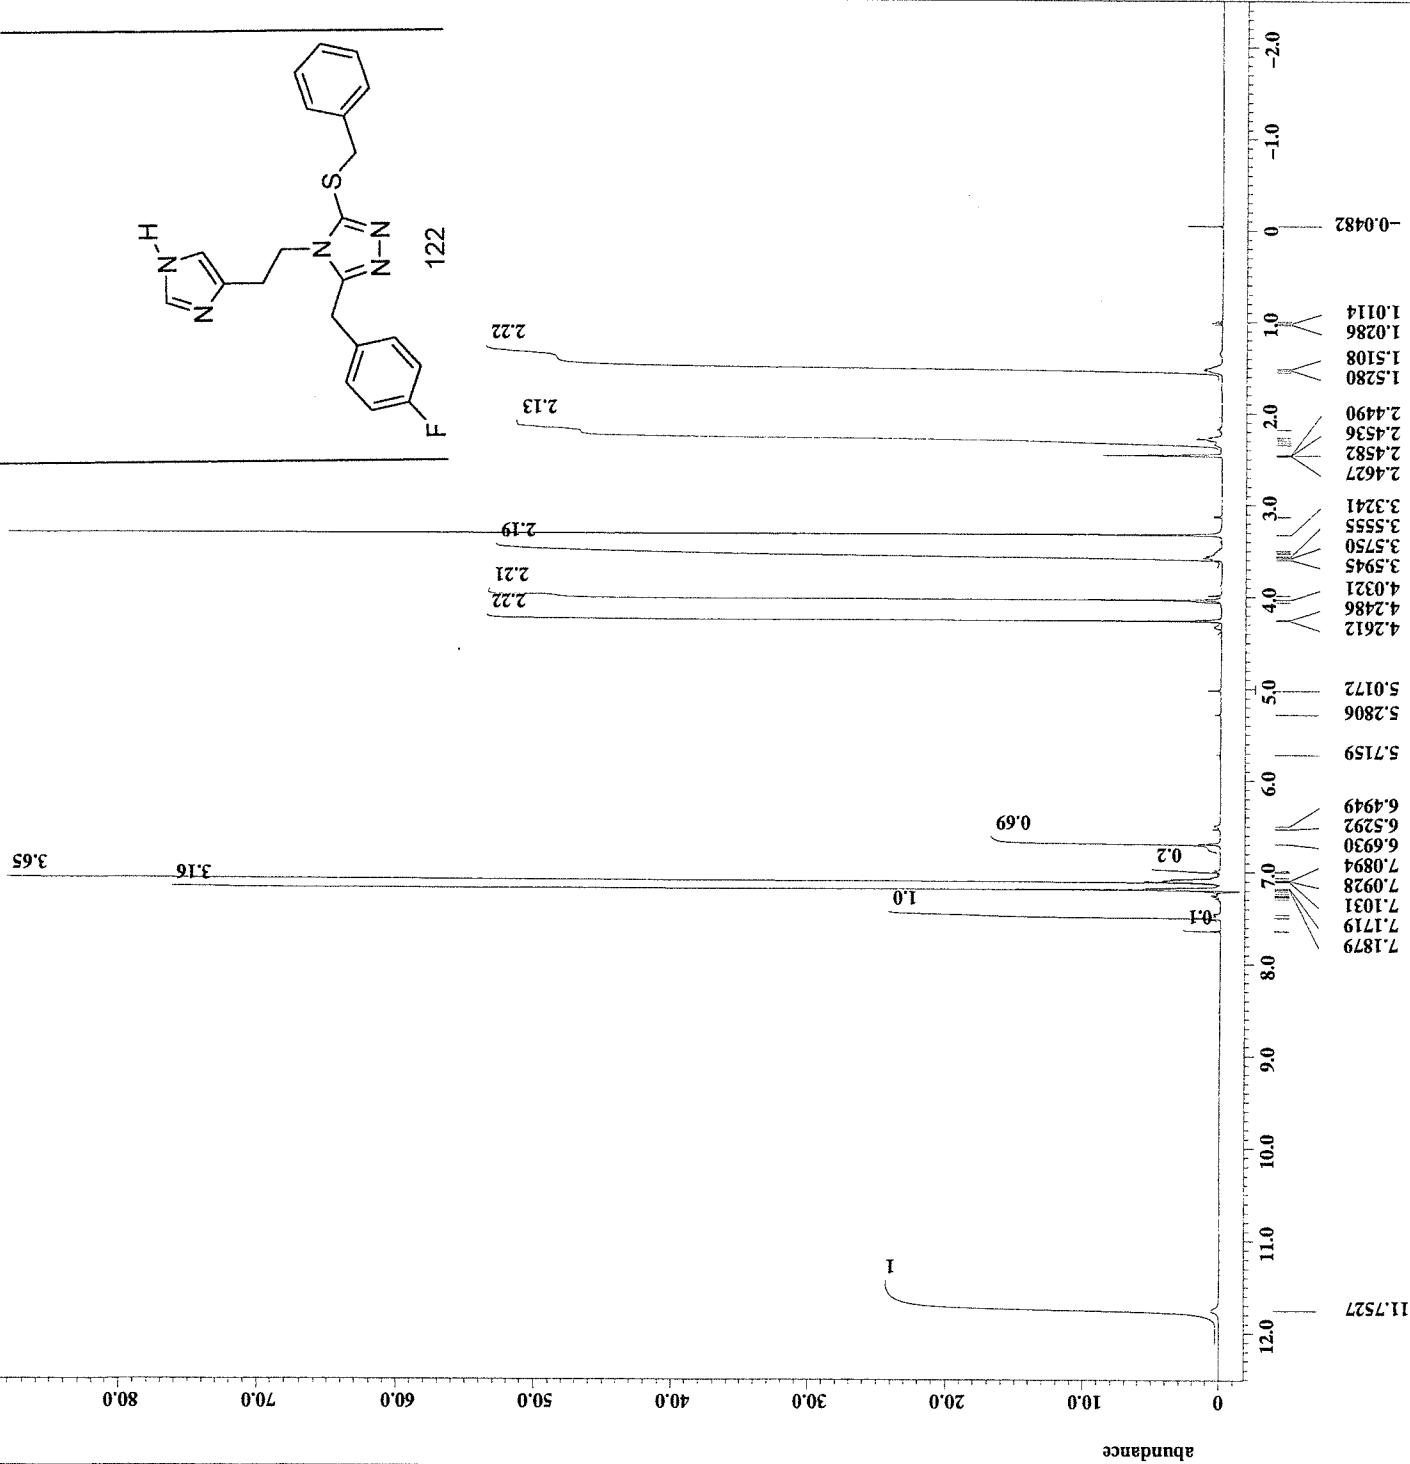

X : parts per Million : 1H

# AJEOL

```

Filename = AMC-S2-56A_CARBON-4.J
Author = mcridler
Experiment = single_pulse_dec
Sample_id = AMC-S2-56A
Solvent = DMSO-D6
Creation_time = 9-JUN-2018 21:37:18
Revision_time = 13-MAY-2024 13:36:23
Current_time = 13-MAY-2024 13:36:47

Data_format = 1D_COMPLEX
Dim_size = 26214
Dim_title = 13C
Dim_units = [ppm]
Dimensions = X
Site = ECS 400
Spectrometer = JNM-ECS400

Field_strength = 9.389766[T] (400[MHz])
X_acq_duration = 1.04333312[s]
X_domain = 13C
X_freq = 100.52530333[MHz]
X_offset = 100[ppm]
X_points = 32768
X_prescans = 4
X_resolution = 0.95846665[Hz]
X_sweep = 31.40703518[MHz]
Irr_domain = 1H
Irr_freq = 399.78219838[MHz]
Irr_offset = 5[ppm]
Clipped = TRUE
Mod_return = 1
Scans = 15000
Total_scans = 15000

X_90_width = 13.22[us]
X_acq_time = 1.04333312[s]
X_angle = 30[deg]
X_atn = 9[db]
X_pulse = 4.40666667[us]
Irr_atn_dec = 27[db]
Irr_atn_noe = 27[db]
Irr_noise = WALTZ
Decoupling = TRUE
Initial_wait = 1[s]
Noe_time = TRUE
Noe_time = 2[s]
Recvr_gain = 60
Relaxation_delay = 2[s]
Repetition_time = 3.04333312[s]
Temp_get = 20.7[dc]
  
```

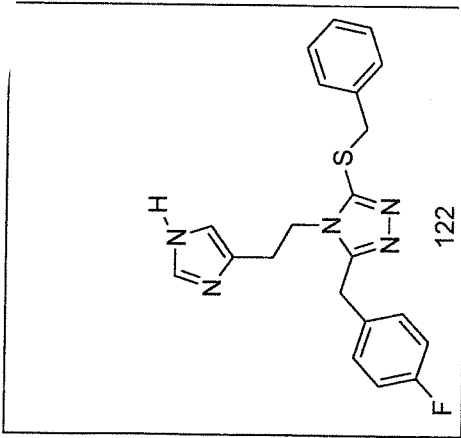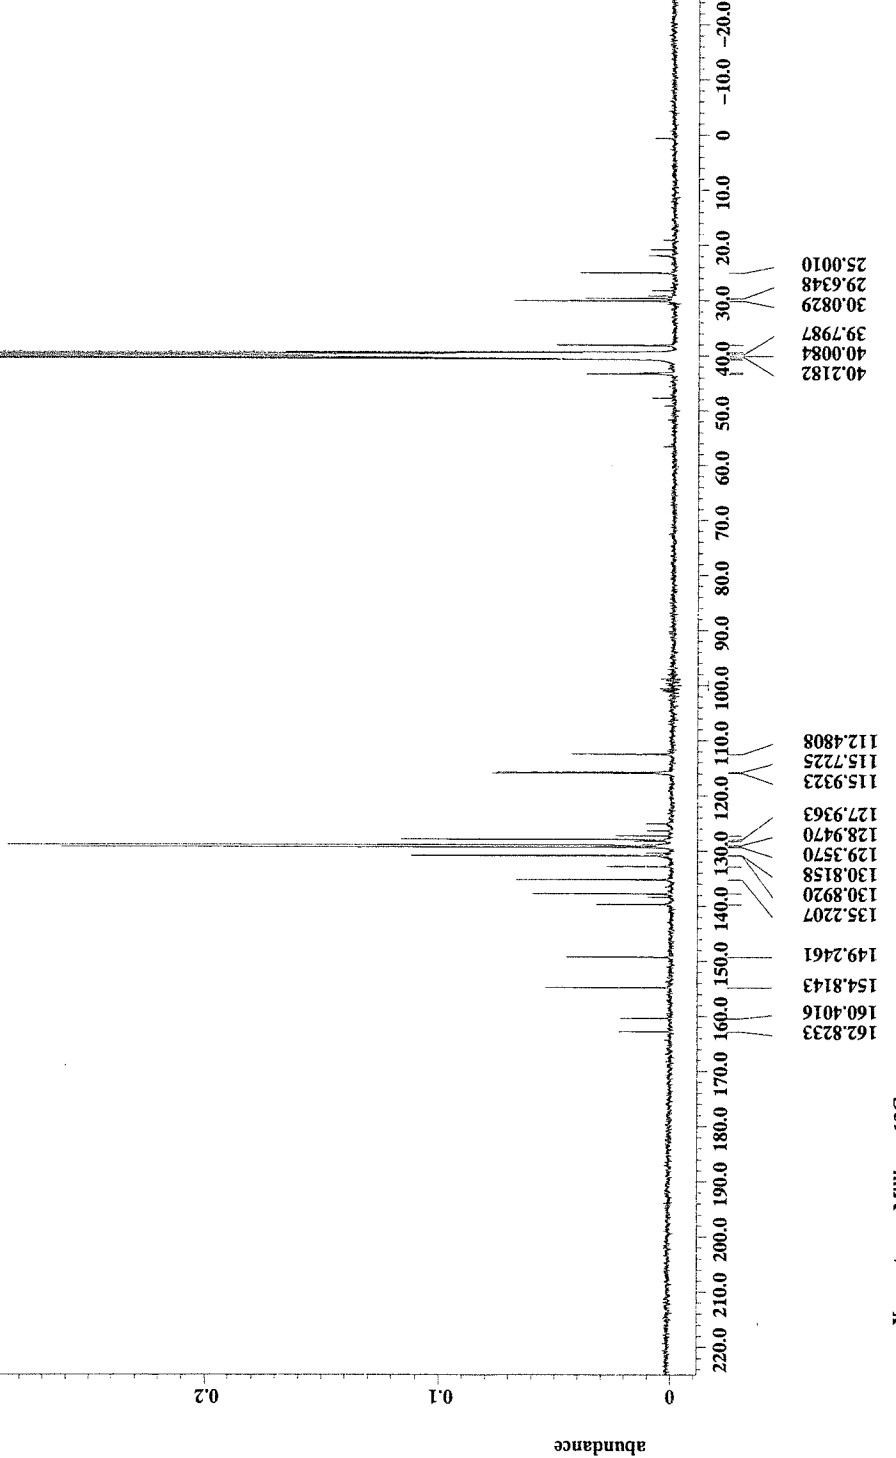

X : parts per Million : 13C

```

= KI-18-8-detryl1 2-4.
= mcrider
= single_pulse.ex2
= S#575857
= CHLOROFORM-D
= 26-OCT-2018 14:38:20
= 10-JAN-2019 15:48:27
= 2-MAY-2024 13:58:52

= single_pulse
= ID COMPLEX
= 13107
= 1H
= [ppm]
= X
= ECS 400
= JNM-ECS400

Field_strength = 9.389766[T] (400 [MHz])
X_acq_duration = 2.18365952[s]
X_domain = 1H
X_freq = 399.78219838 [MHz]
X_offset = 5[ppm]
X_points = 16384
X_prescans = 1
X_resolution = 0.45794685 [Hz]
X_sweep = 7.5030012 [kHz]
Irr_domain = 1H
Irr_freq = 399.78219838 [MHz]
Irr_offset = 5[ppm]
Tri_domain = 1H
Tri_freq = 399.78219838 [MHz]
Tri_offset = 5[ppm]
Clipped = FALSE
Mod_return = 1
Scans = 8
Total_scans = 8

X_90_width = 11.365 [us]
X_acq_time = 2.18365952 [s]
X_angle = 45 [deg]
X_atn = 6 [dB]
X_pulse = 5.6825 [us]
Irr_mode = Off
Tri_mode = Off
Dance_preset = FALSE
Initial_wait = 1 [s]
Recvr_gain = 50
Relaxation_delay = 5 [s]
Repetition_time = 7.18365952 [s]
Temp_get = 18.6 [dC]
  
```

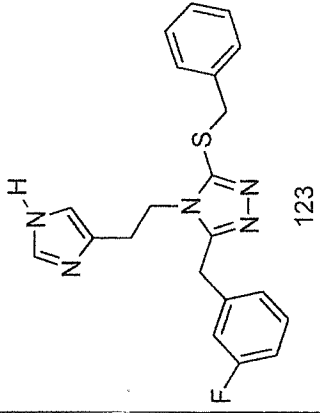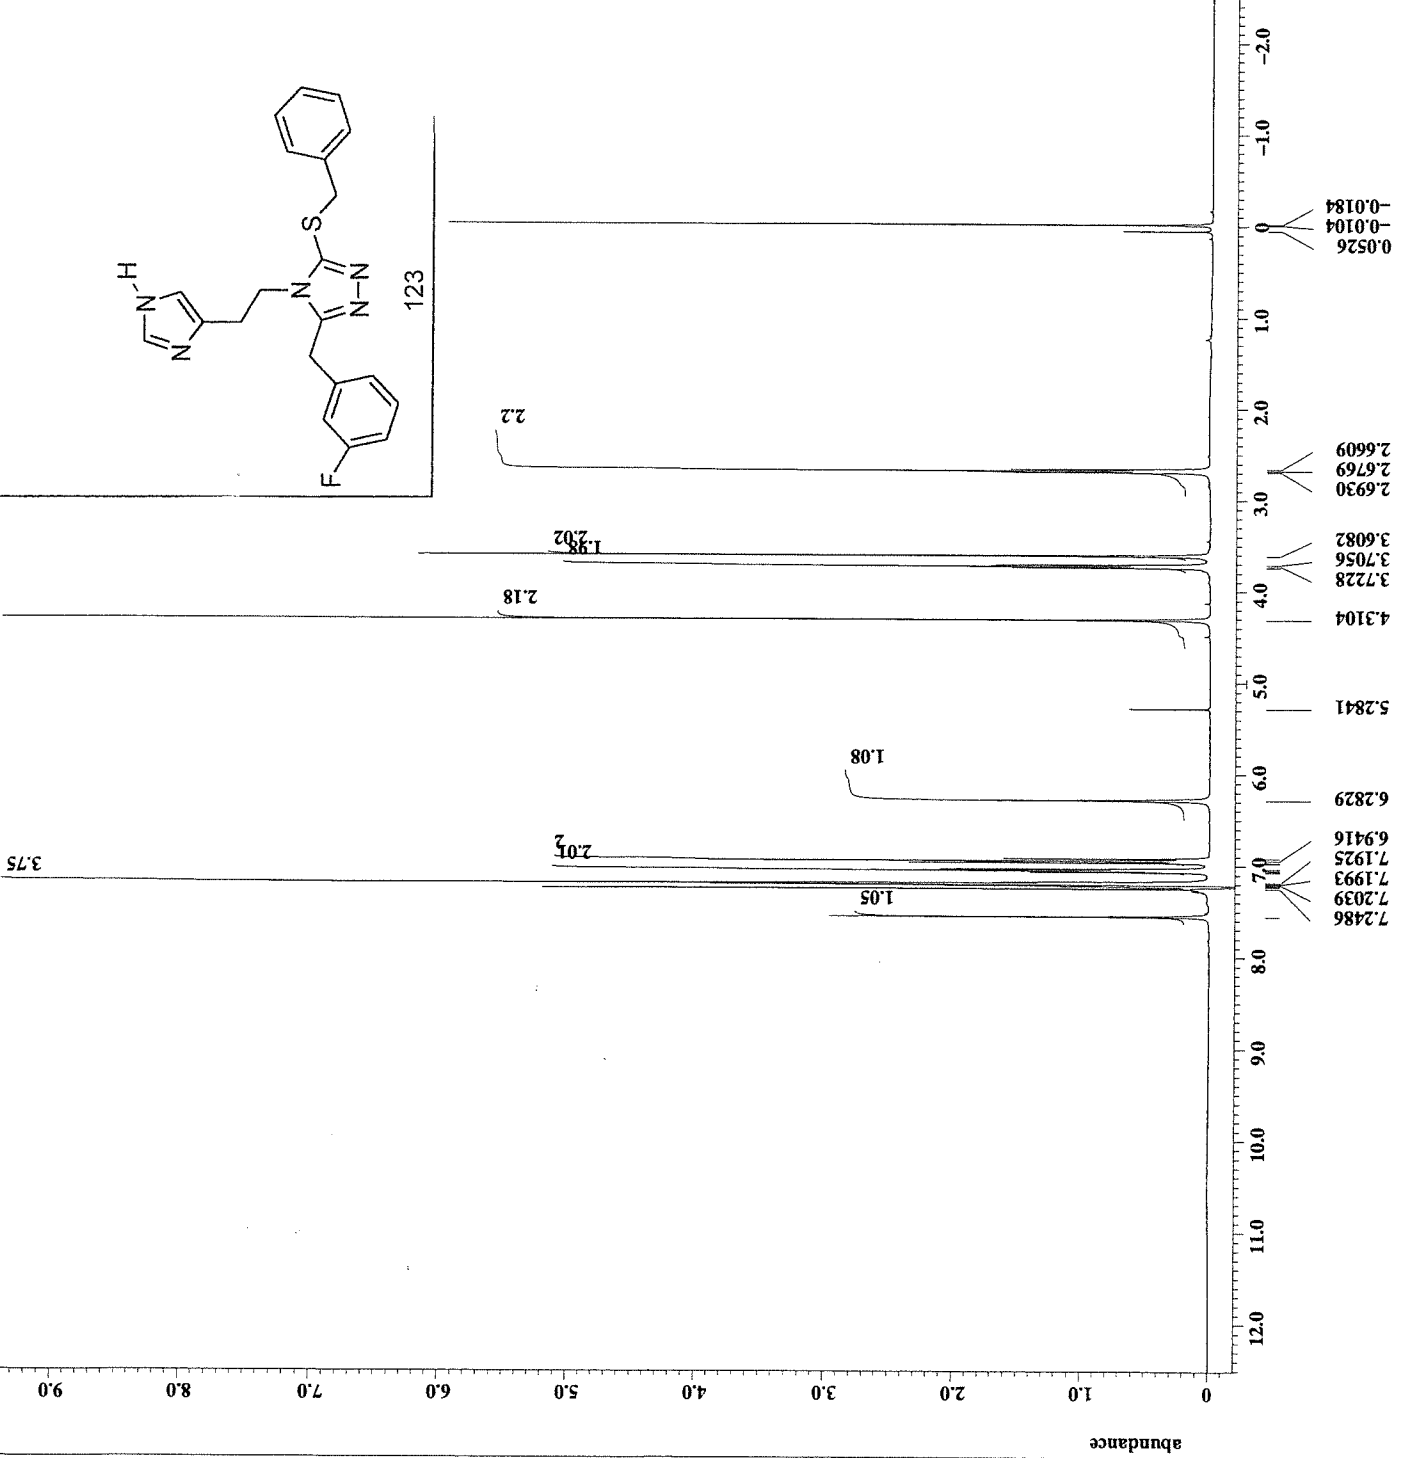

# AJEOL

```

Filename = KI-18-8-detrityl 2-4.
Author = mcrider
Experiment = single_pulse.ex2
Sample_id = S#575857
Solvent = CHLOROFORM-D
Creation_time = 26-OCT-2018 14:38:20
Revision_time = 10-JAN-2019 15:48:27
Current_time = 2-MAY-2024 13:59:27

Comment = single_pulse
Data_format = 1D COMPLEX
Dim_size = 13107
Dim_title = 1H
Dim_units = [ppm]
Dimensions = X
Site = ECS 400
Spectrometer = JNM-ECS400

Field_strength = 9.389766[T] (400[MHz])
X_acq_duration = 2.18365952[s]
X_domain = 1H
X_freq = 399.78219838[MHz]
X_offset = 5[ppm]
X_points = 16384
X_prescans = 1
X_resolution = 0.45794685[Hz]
X_sweep = 7.5030012[kHz]
Irr_domain = 1H
Irr_freq = 399.78219838[MHz]
Irr_offset = 5[ppm]
Tri_domain = 1H
Tri_freq = 399.78219838[MHz]
Tri_offset = 5[ppm]
Clipped = FALSE
Mod_return = 1
Total_scans = 8

X_90_width = 11.365[us]
X_acq_time = 2.18365952[s]
X_angle = 45[deg]
X_atn = 6[db]
X_pulse = 5.6825[us]
Irr_mode = Off
Tri_mode = Off
Dante_presat = FALSE
Initial_wait = 1[s]
Recvr_gain = 50
Relaxation_delay = 5[s]
Repetition_time = 7.18365952[s]
Temp_get = 18.6[degC]
  
```

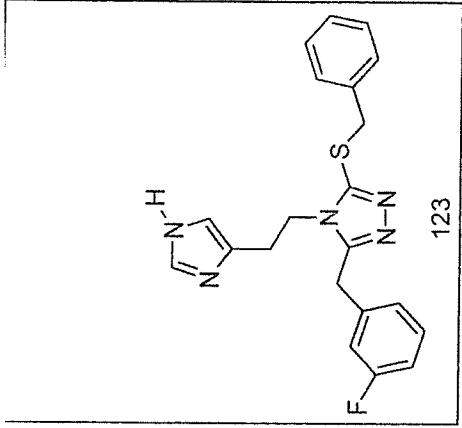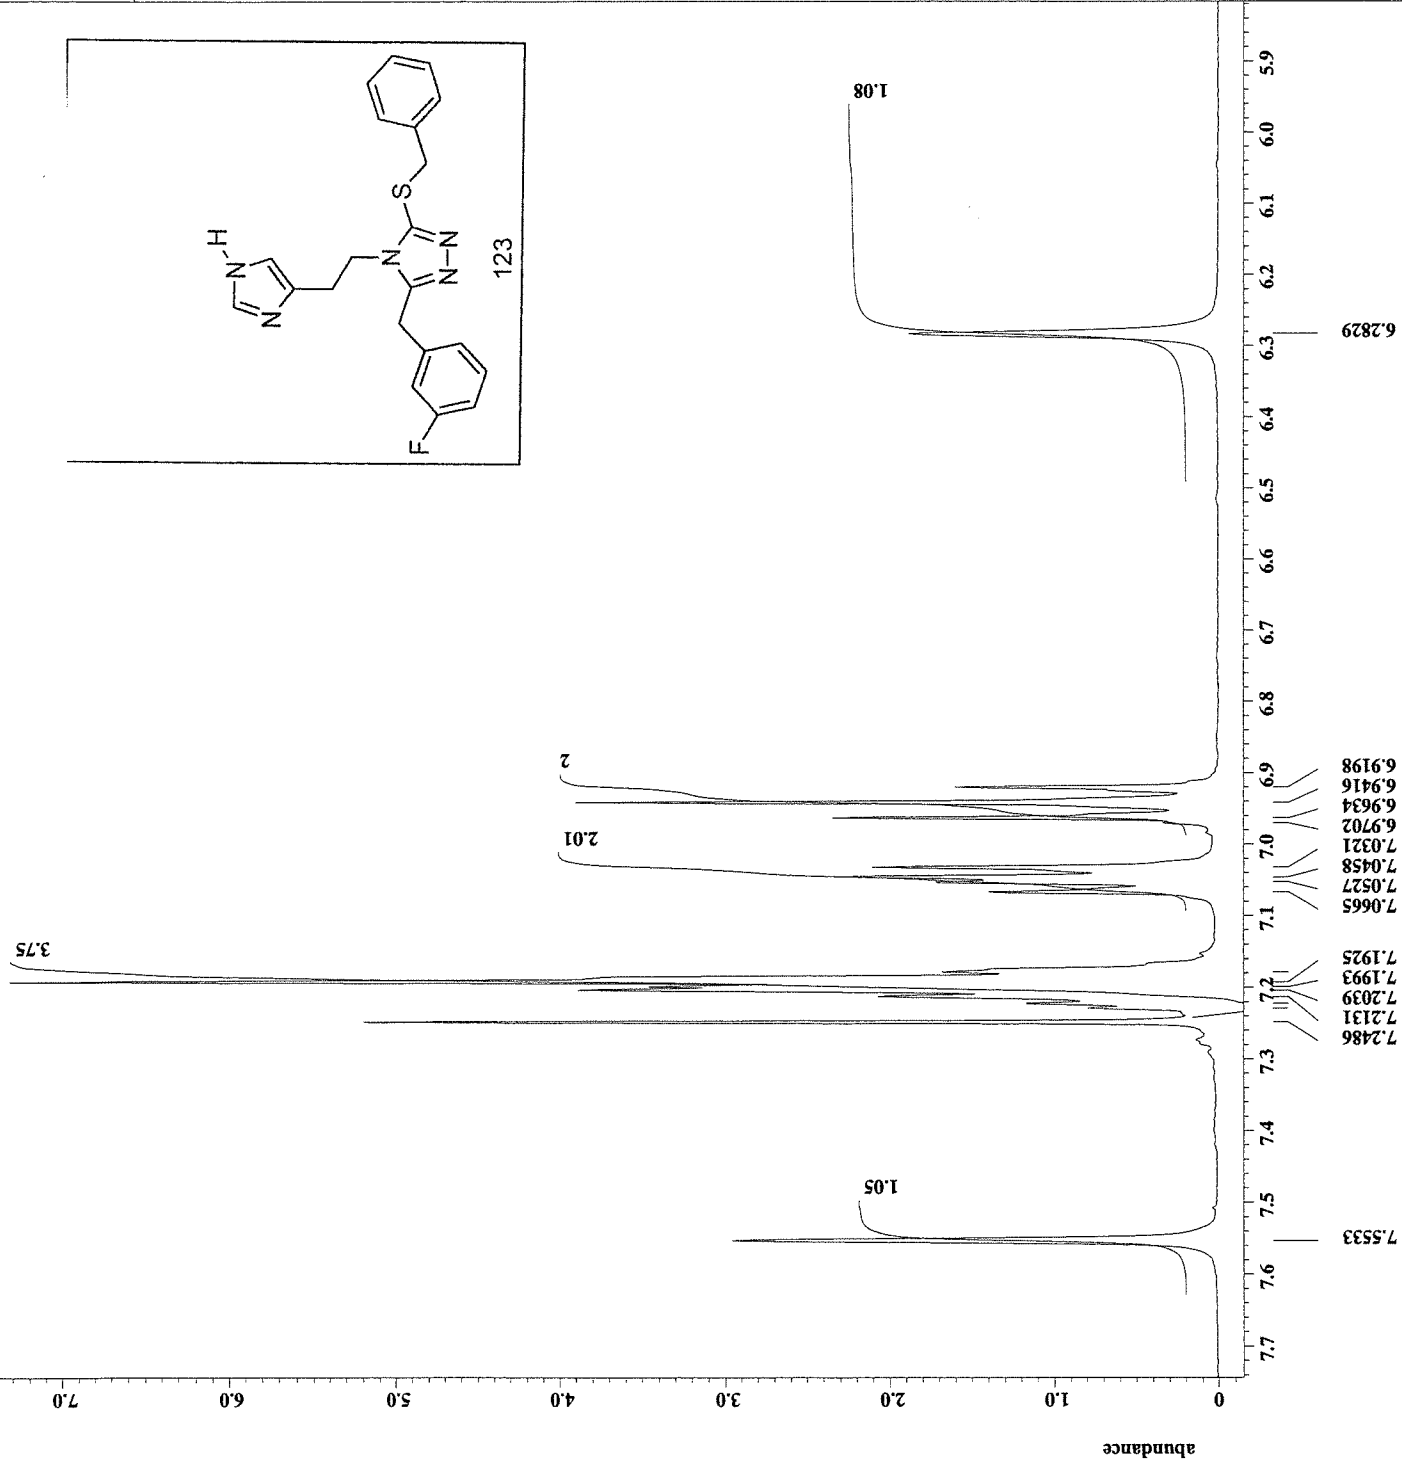

X : parts per Million : 1H



```

= KI-18-8-detrityl_2_CA
= mcrider
= single_pulse_dec
= KI-18-8-detrityl_2
= CHLOROFORM-D
= 26-OCT-2018 15:59:59
= 2-MAY-2024 13:57:12
= 2-MAY-2024 13:57:33

= 1D COMPLEX
= 26214
= 13C
= [ppm]
= X
= ECS 400
= JNM-ECS400

= 9.389766[T] (400[MHz])
= 1.04333312[s]
= 13C
= 100.52530333[MHz]
= 32768
= 4
= 0.95846665[Hz]
= 31.40703518[MHz]
= 1H
= 399.78219838[MHz]
= 5[ppm]
= FALSE
= 1
= 1500
= 1500

= 10.4[us]
= 1.04333312[s]
= 30[deg]
= 9[dB]
= 3.46666667[us]
= 24.2[dB]
= 24.2[dB]
= WALTZ
= TRUE
= 1[s]
= TRUE
= 2[s]
= 60
= Relaxation_delay = 2[s]
= Repetition_time = 3.04333312[s]
= Temp_get = 19[degC]
  
```

```

File name
Author
Experiment
Sample_id
Solvent
Creation time
Revision time
Current_time

Data_format
Dim_size
Dim_title
Dim_units
Dimensions
Site
Spectrometer

Field_strength
X_acq_duration
X_domain
X_freq
X_offset
X_points
X_prescans
X_resolution
X_sweep
Irr_domain
Irr_freq
Irr_offset
Clipped
Mod_return
Scans
Total_scans

X_90_width
X_acq_time
X_angle
X_atn
X_pulse
Irr_atn_dec
Irr_atn_noe
Irr_noise
Decoupling
Initial_wait
Noe
Noe_time
Recvr_gain
Relaxation_delay
Repetition_time
Temp_get
  
```

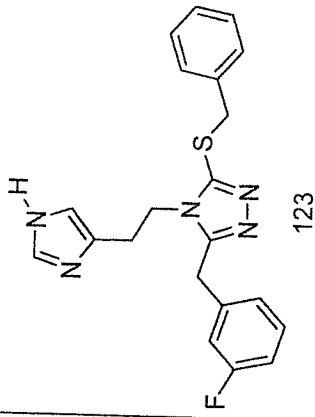

0.3

0.2

0.1

abundance

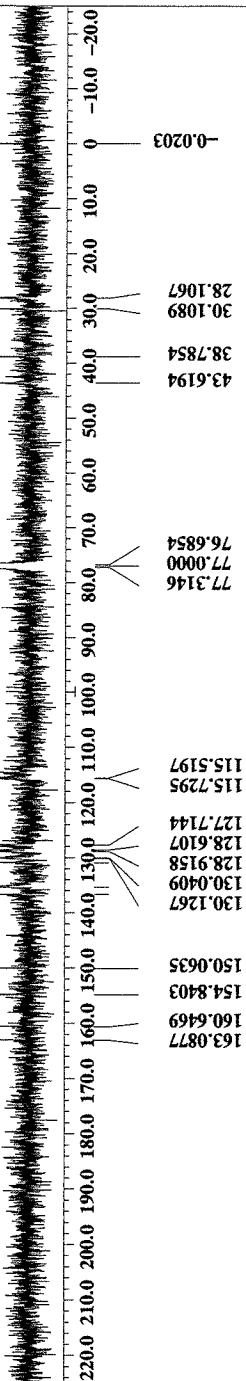

X : parts per Million : 13C

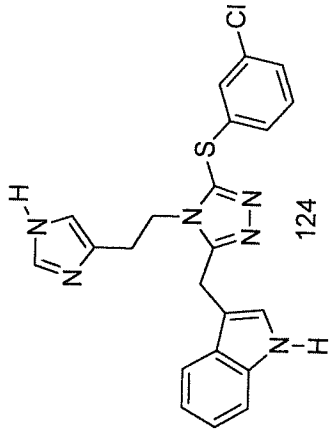

124

0.3

0.2

0.1

0

abundance

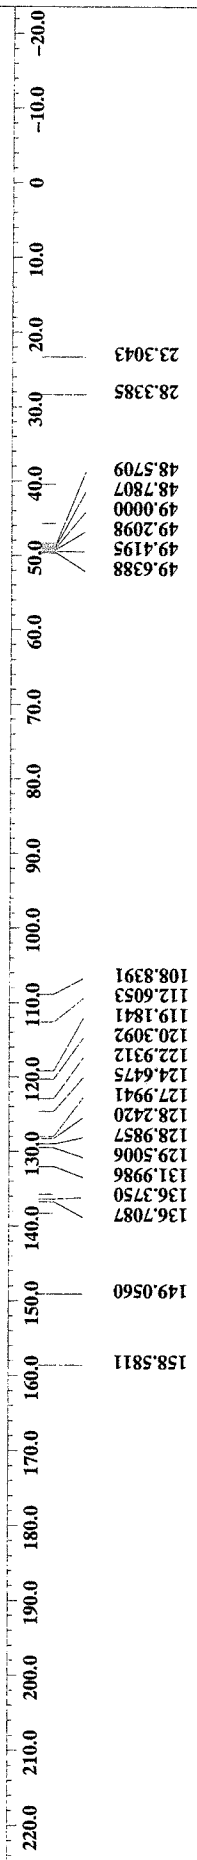

X : parts per Million : 13C

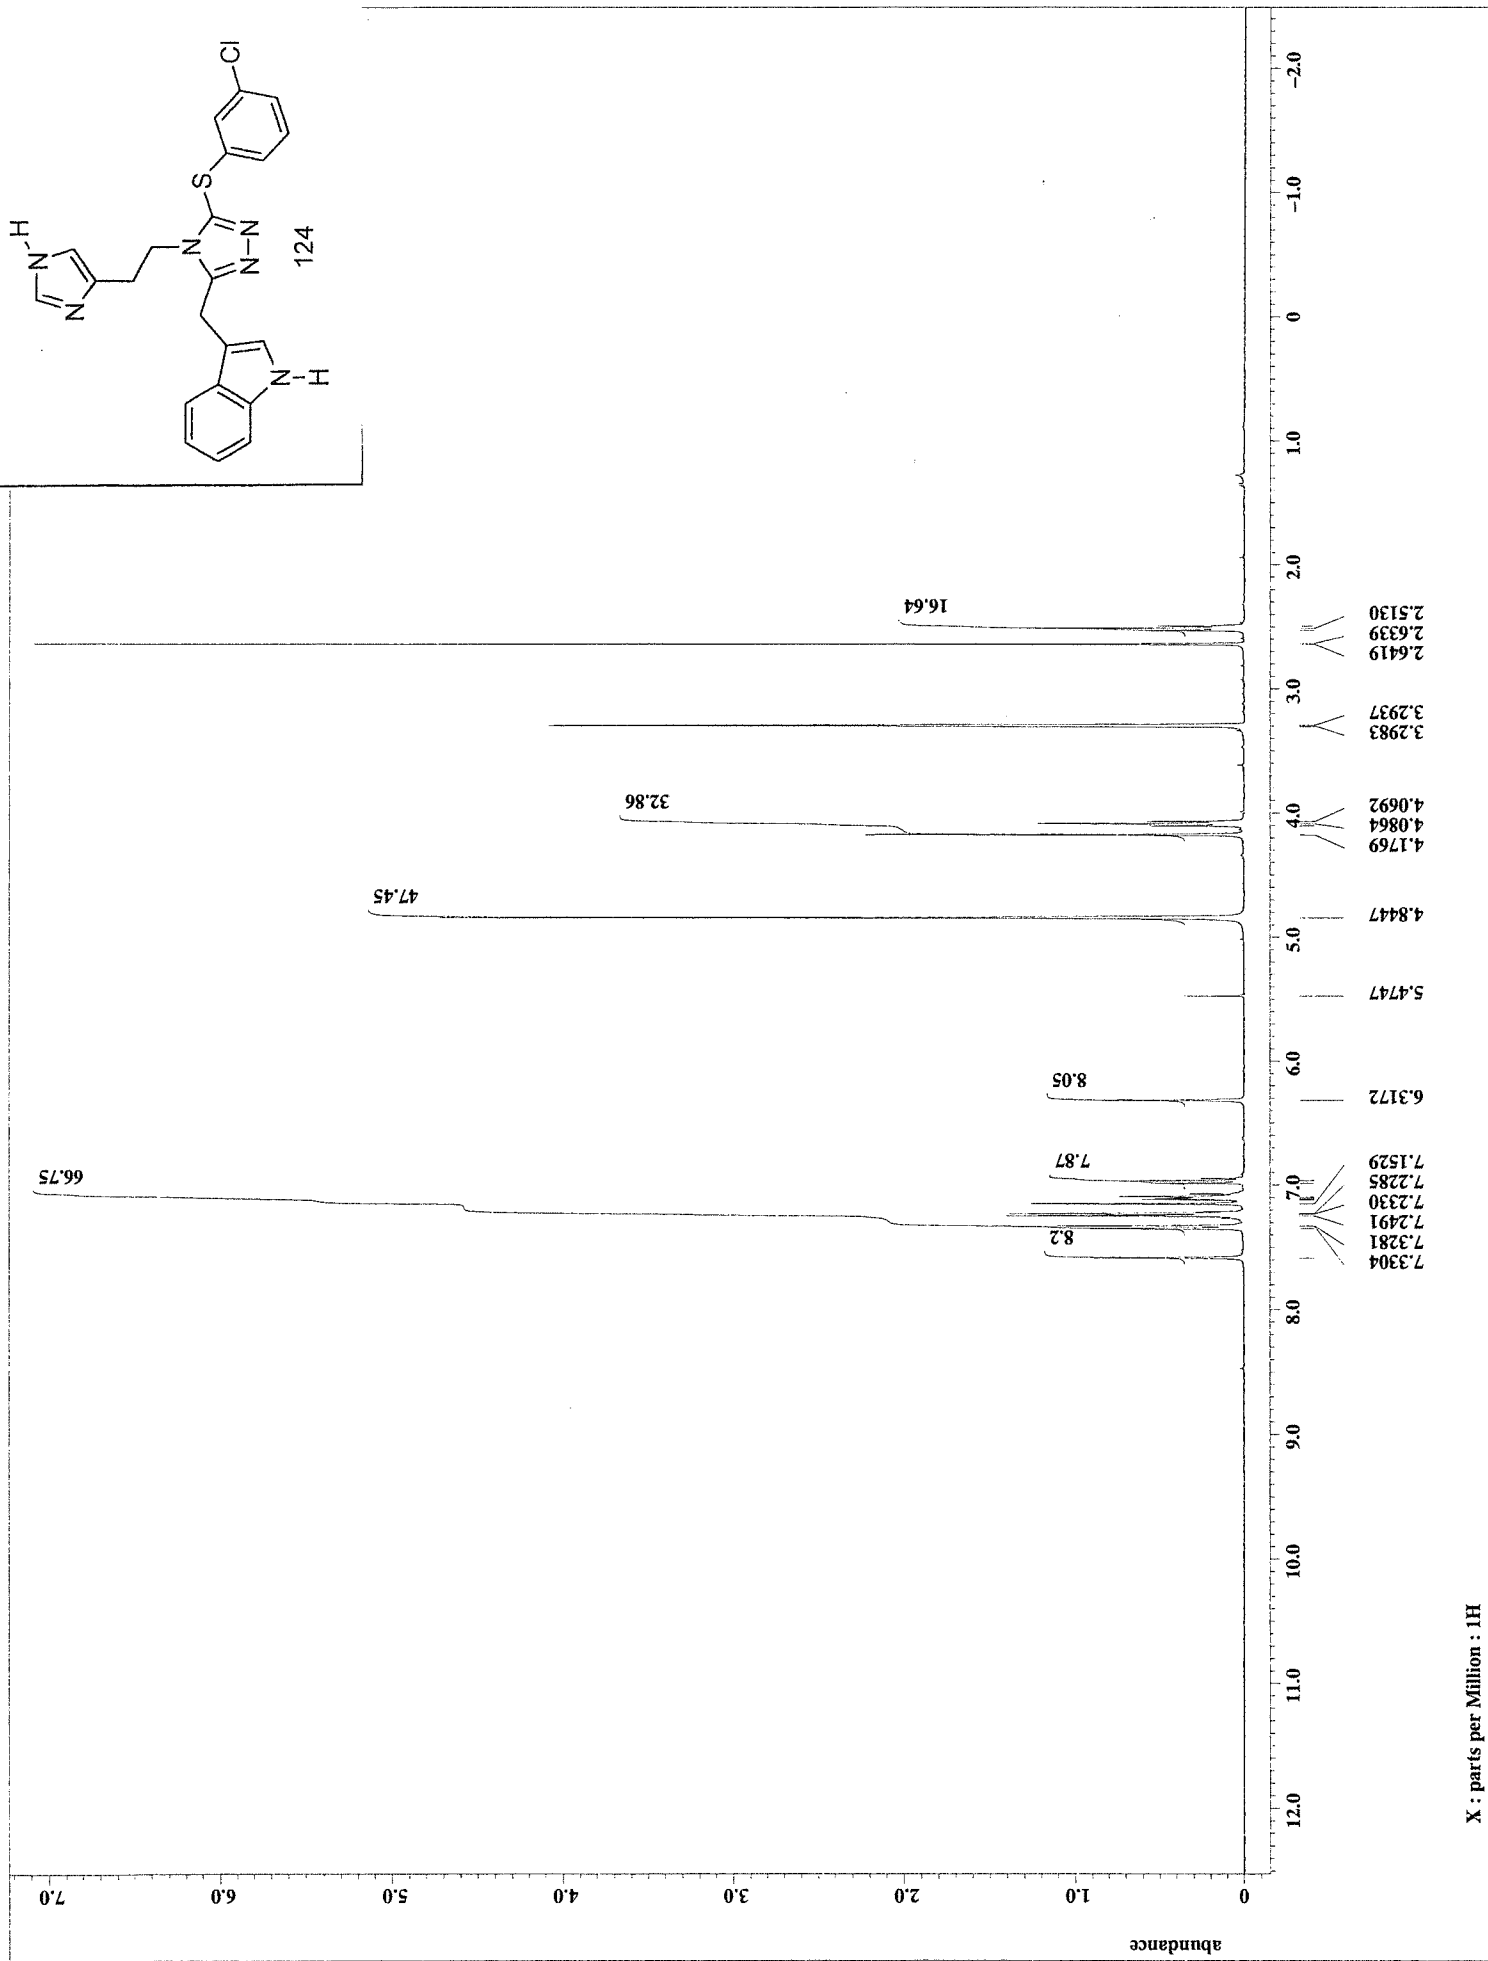

X : parts per Million : 1H

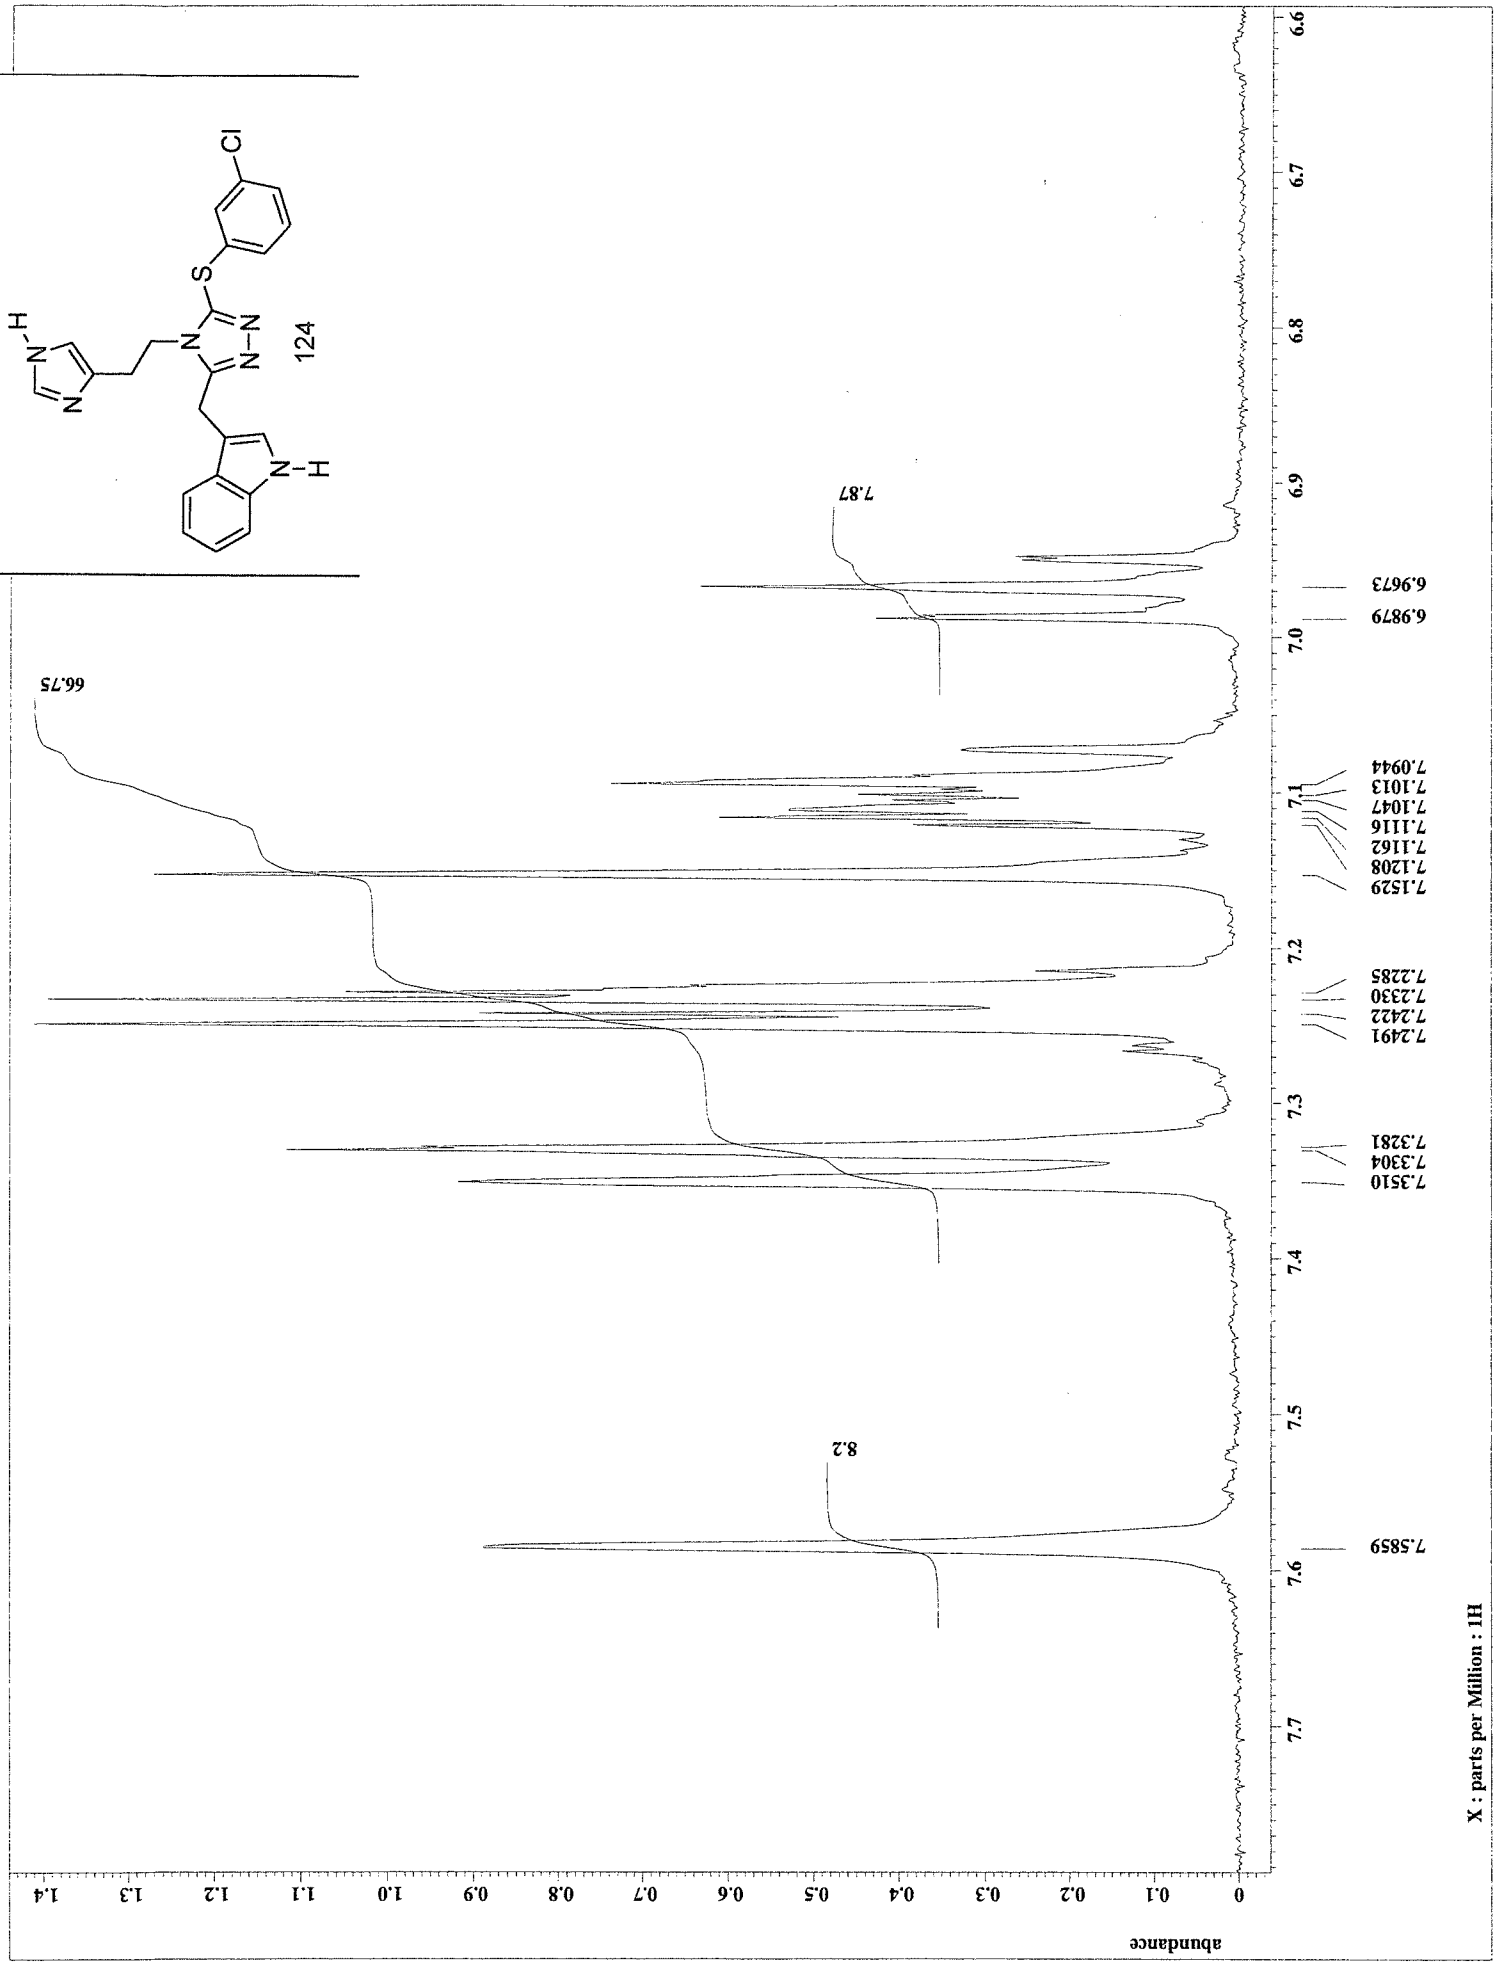

X : parts per Million : 1H

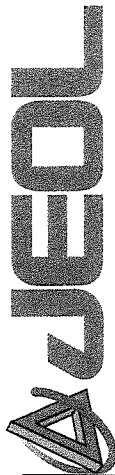

```

= LG-I-67-1-6.jdf
= mcridex
= single_pulse.ex2
= S#587616
= DMSO-D6
= 23-SEP-2019 14:38:20
= 6-MAY-2024 09:44:29
= 6-MAY-2024 09:44:38
= single_pulse
= 1D_COMPLEX
= 13107
= 1H
= [ppm]
= X
= ECS 400
= JNM-ECS400
= 9.389766[T] (400[MHz])
= 2.18365952[s]
= 1H
= 399.78219838 [MHz]
= 5[ppm]
= 16384
= 1
= 0.45794685 [Hz]
= 7.5030012 [kHz]
= 1H
= 399.78219838 [MHz]
= 5[ppm]
= 1H
= 399.78219838 [MHz]
= 5[ppm]
= TRUE
= 1
= 8
= 13.581 [us]
= 2.18365952[s]
= 45 [deg]
= 6[d8]
= 6.7905 [us]
= Off
= Off
= FALSE
= Dante_preset
= Initial_wait
= 1[s]
= 50
= Relaxation_delay
= 5[s]
= Repetition_time
= 7.18365952[s]
= Temp_get
= 19.8 [dC]

```

```

Filename
Author
Experiment
Sample_id
Solvent
Creation_time
Revision_time
Current_time
Comment
Data_format
Dim_size
Dim_title
Dim_units
Dimensions
Site
Spectrometer
Field_strength
X_acq_duration
X_domain
X_freq
X_offset
X_points
X_prescans
X_resolution
X_sweep
Irr_domain
Irr_freq
Irr_offset
Tri_domain
Tri_freq
Tri_offset
Clipped
Mod_return
Scans
Total_scans
X_90_width
X_acq_time
X_angle
X_atn
X_pulse
Irr_mode
Tri_mode
Dante_preset
Initial_wait
Recvr_gain
Relaxation_delay
Repetition_time
Temp_get

```

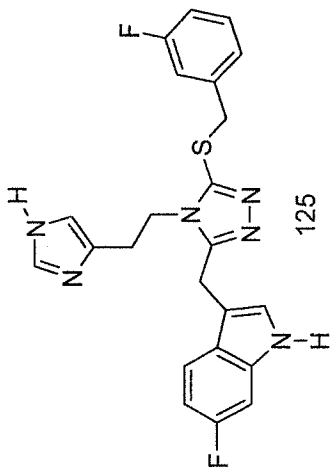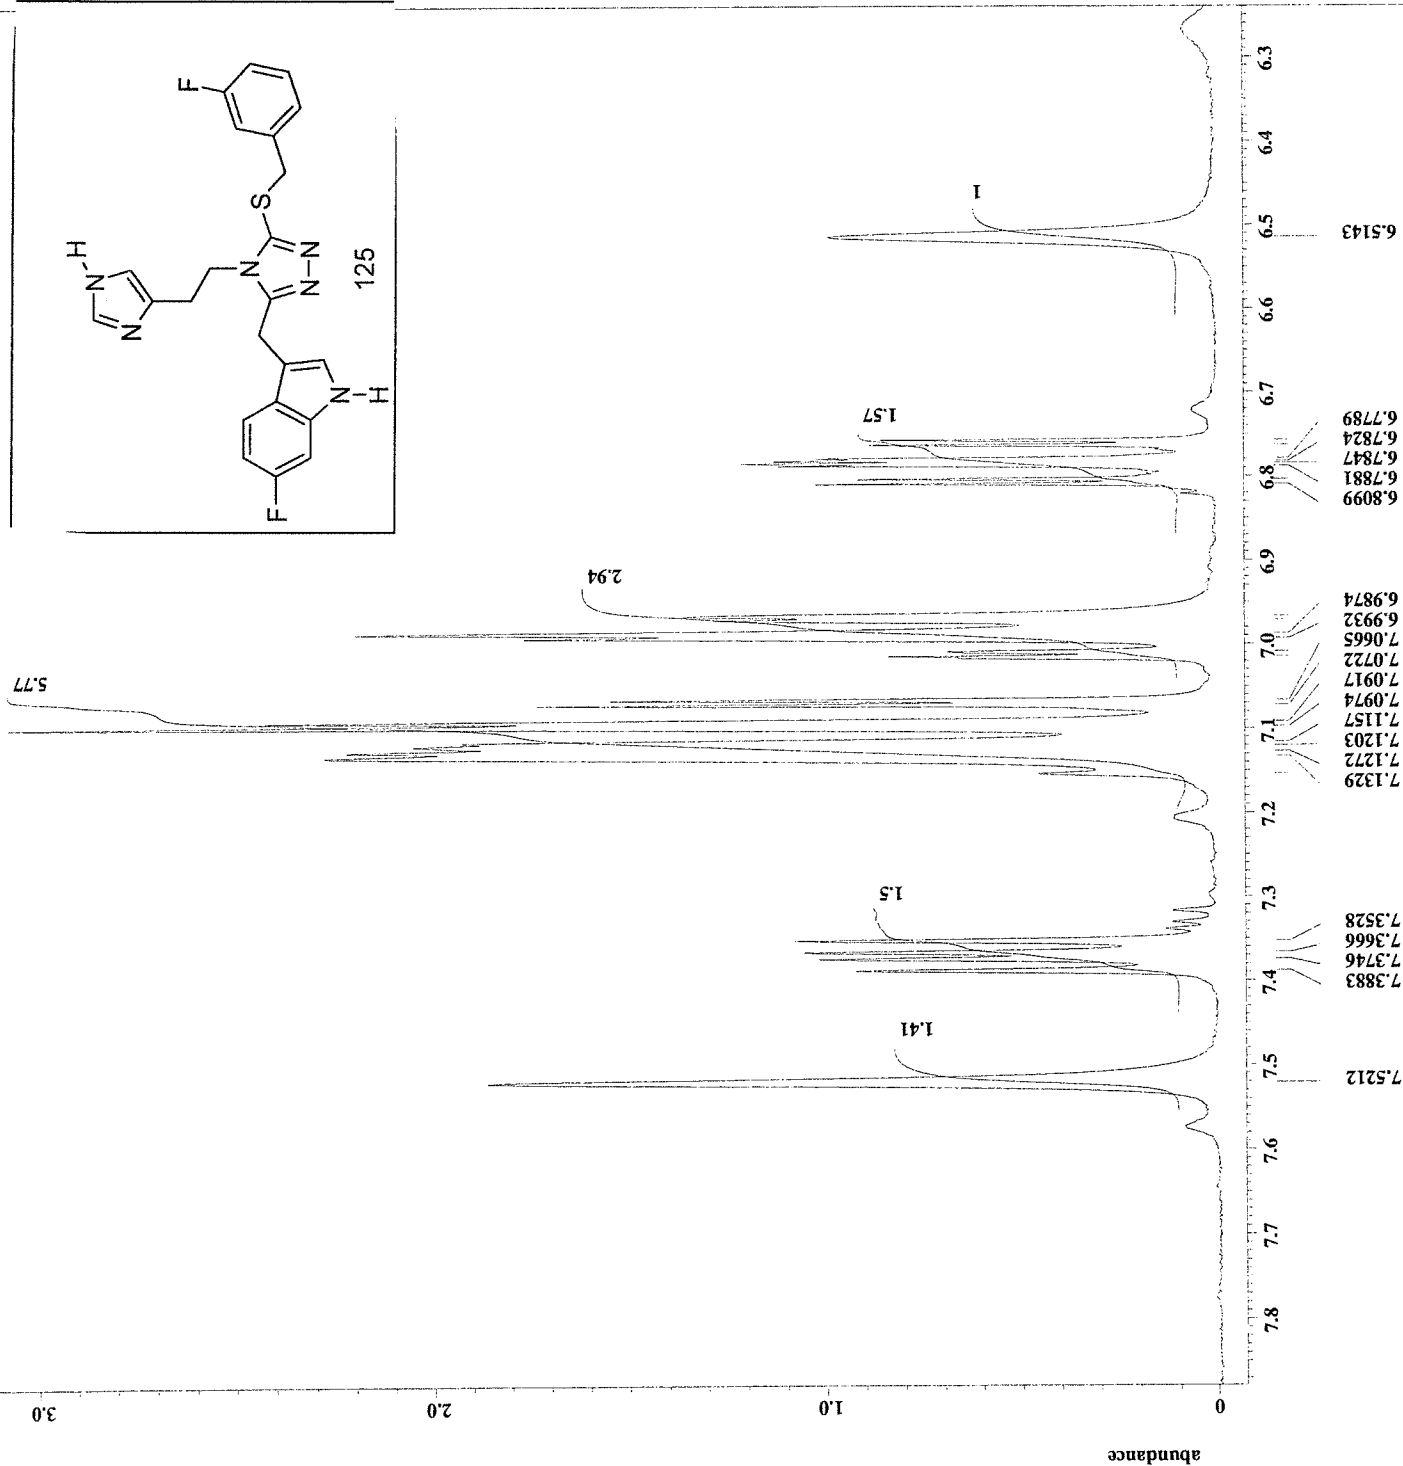

X : parts per Million : 1H

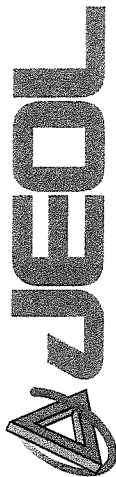

File name = LG-I-67-1-3.jdf  
Author = mcrider  
Experiment = single\_pulse.ex2  
Sample\_id = S#587616  
Solvent = DMSO-D6  
Creation\_time = 23-SEP-2019 14:38:20  
Revision\_time = 6-MAY-2024 09:40:26  
Current\_time = 6-MAY-2024 09:40:34  
Comment = single\_pulse  
Data\_format = 1D COMPLEX  
Dim\_size = 13107  
Dim\_title = 1H  
Dim\_units = [ppm]  
Dimensions = X  
Site = ECS 400  
Spectrometer = JNM-ECS400  
Field\_strength = 9.389766[T] (400[MHz])  
X\_acq\_duration = 2.18365952[s]  
X\_domain = 1H  
X\_freq = 399.78219838[MHz]  
X\_offset = 5[ppm]  
X\_points = 16384  
X\_prescans = 1  
X\_resolution = 0.45794685[Hz]  
X\_sweep = 7.5030012[kHz]  
Irr\_domain = 1H  
Irr\_freq = 399.78219838[MHz]  
Irr\_offset = 5[ppm]  
Tri\_domain = 1H  
Tri\_freq = 399.78219838[MHz]  
Tri\_offset = 5[ppm]  
Clipped = TRUE  
Mod\_return = 1  
Scans = 8  
Total\_scans = 8  
X\_90\_width = 13.581[us]  
X\_acq\_time = 2.18365952[s]  
X\_angle = 45[deg]  
X\_atn = 6[db]  
X\_pulse = 6.7905[us]  
Irr\_mode = Off  
Tri\_mode = Off  
Dante\_presat = FALSE  
Initial\_wait = 1[s]

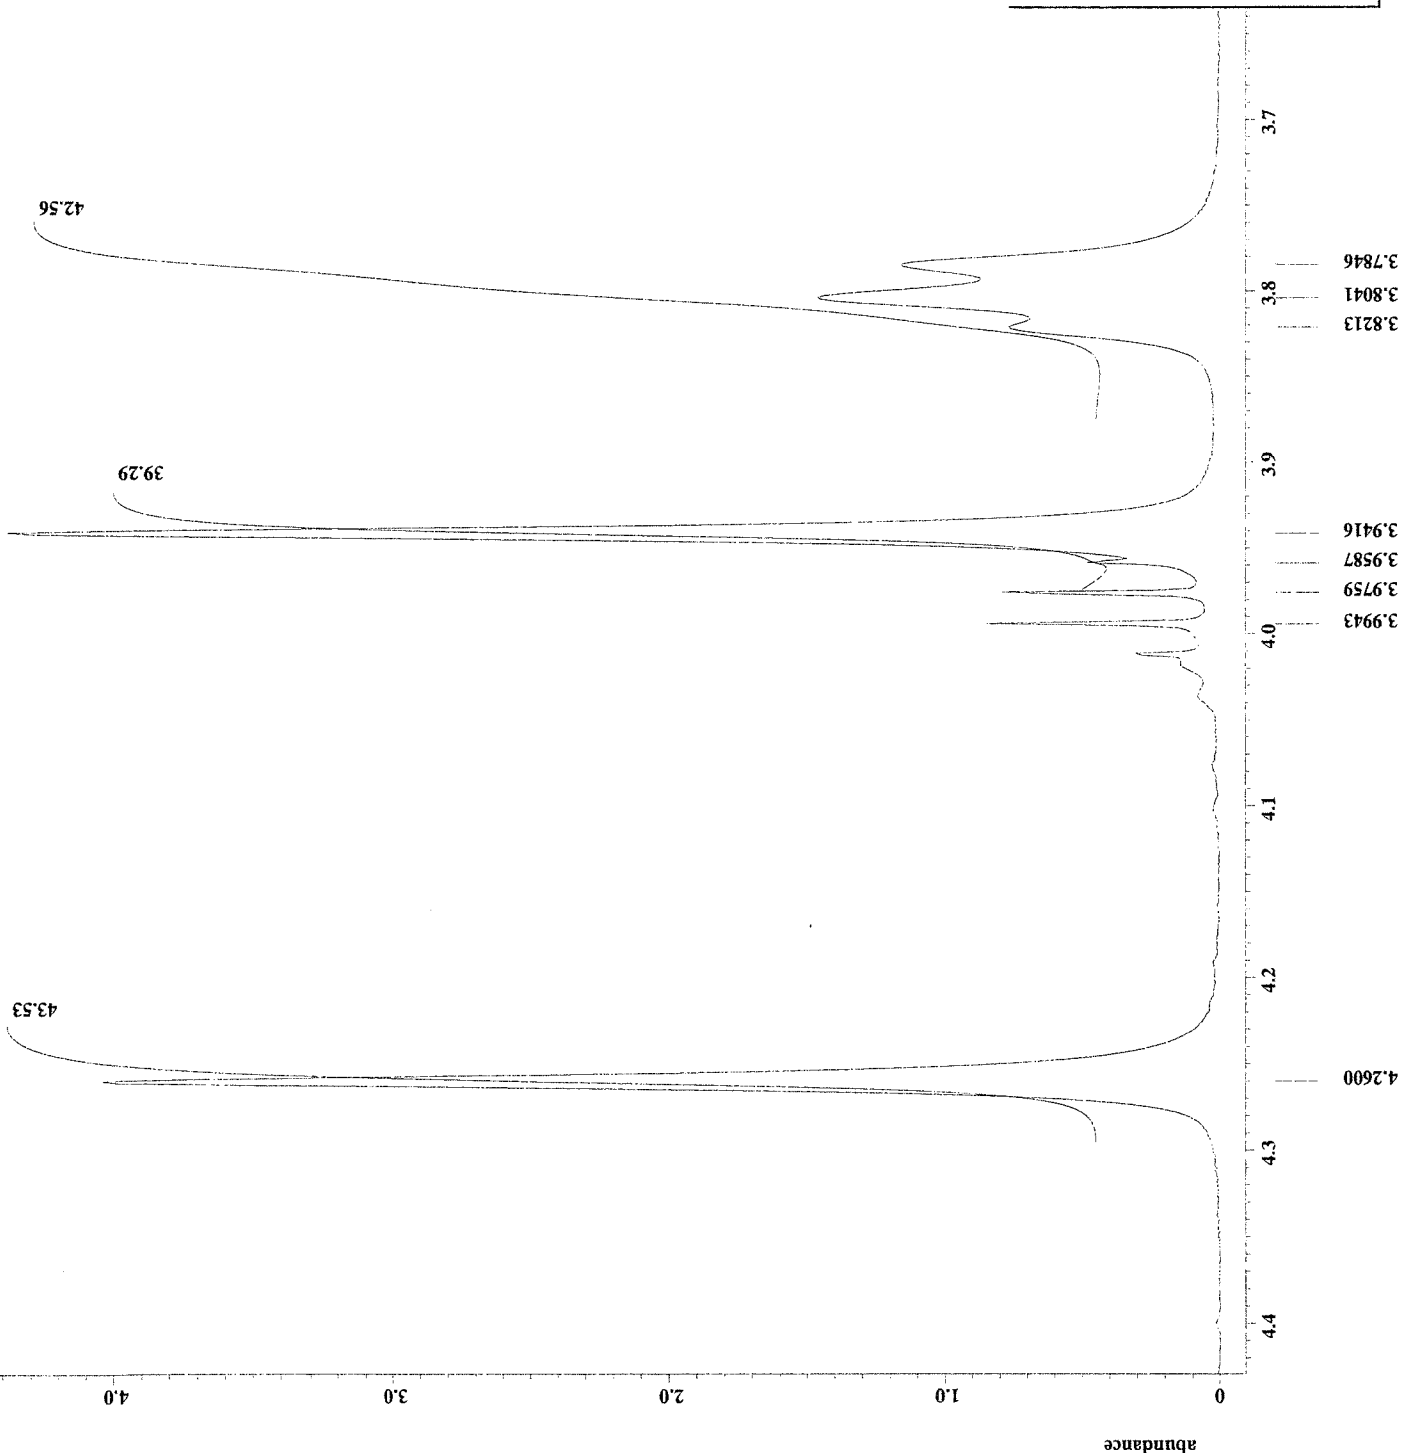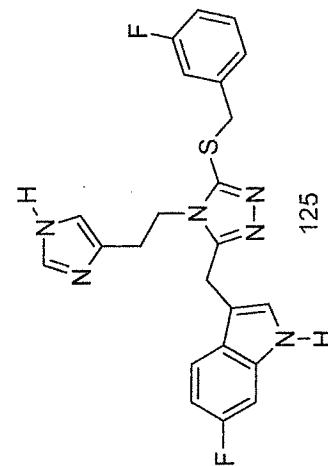

X : parts per Million : 1H

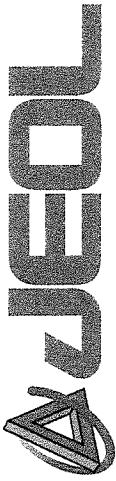

File = LG-I-67-1-5.jdf  
Author = mcrider  
Experiment = single\_pulse.ex2  
Sample\_id = S#587616  
Solvent = DMSO-D6  
Creation\_time = 23-SEP-2019 14:38:20  
Revision\_time = 6-MAY-2024 03:42:22  
Current\_time = 6-MAY-2024 03:42:28

Comment = single\_pulse  
Data\_format = 1D COMPLEX  
Dim\_size = 13107  
Dim\_title = 1H  
Dim\_units = [ppm]  
Dimensions = X  
Site = ECS 400  
Spectrometer = JNM-ECS400

Field\_strength = 9.389766[T] (400[MHz])  
X\_acq\_duration = 2.18365952[s]  
X\_domain = 1H  
X\_freq = 399.78219838[MHz]  
X\_offset = 5[ppm]  
X\_points = 16384  
X\_prescans = 1  
X\_resolution = 0.45794685[Hz]  
X\_sweep = 7.5030012[kHz]  
Irr\_domain = 1H  
Irr\_freq = 399.78219838[MHz]  
Irr\_offset = 5[ppm]  
Tri\_domain = 1H  
Tri\_freq = 399.78219838[MHz]  
Tri\_offset = 5[ppm]  
Clipped = TRUE  
Mod\_return = 1  
Scans = 8  
Total\_scans = 8

X\_90\_width = 13.581[us]  
X\_acq\_time = 2.18365952[s]  
X\_angle = 45[deg]  
X\_atn = 6[db]  
X\_pulse = 6.7905[us]  
Irr\_mode = Off  
Tri\_mode = Off  
Dante\_presat = FALSE  
Initial\_wait = 1[s]  
Recvr\_gain = 50  
Relaxation\_delay = 5[s]  
Repetition\_time = 7.18365952[s]  
Temp\_get = 19.8[dc]

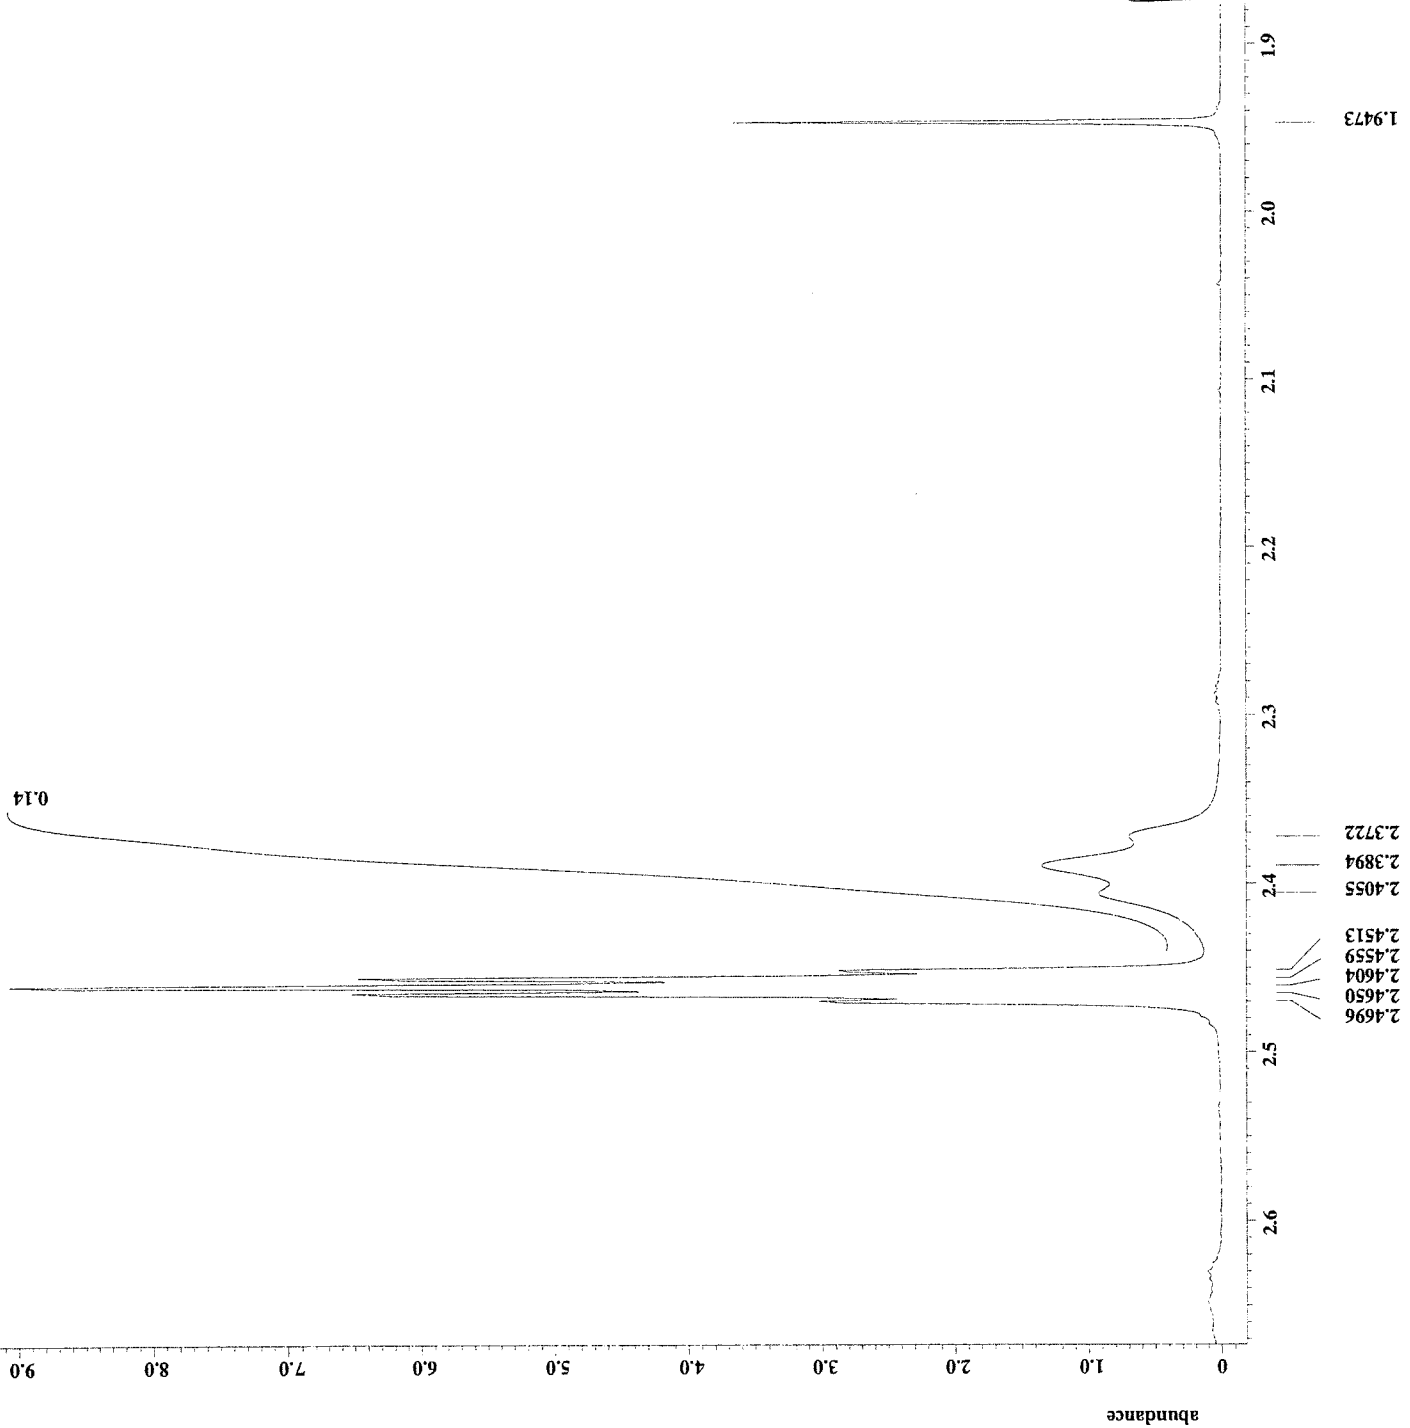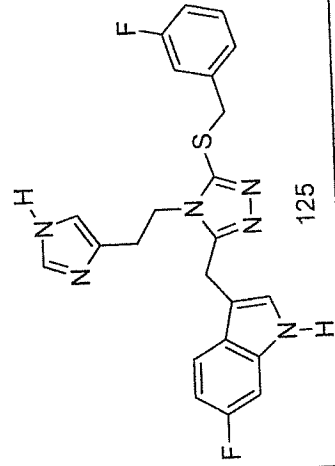

X : parts per Million : 1H

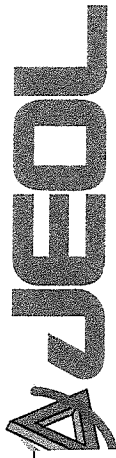

```

= 6F indole mCH3 detrit
= mcrider
= single_pulse.ex2
= S#531596
= DMSO-D6
= 14-APR-2019 13:13:52
= 7-MAY-2024 10:30:20
= 7-MAY-2024 10:30:39
= single_pulse
= 1D COMPLEX
= 13107
= 1H
= [ppm]
= X
= ECS 400
= JNM-ECS400

```

```

lename
thor
periment
pfile_id
lvent
sation_time
rison_time
rent_time
ment
a_format
l_size
l_title
l_units
nsions
e
spectrumeter

```

```

Field_strength = 9.389766[T] (400[MHz])
X_acq_duration = 2.18365952[s]
X_domain = 1H
X_freq = 399.78219838 [MHz]
X_offset = 5[ppm]
X_points = 16384
X_prescans = 1
X_resolution = 0.45794685 [Hz]
X_sweep = 7.5030012 [KHz]
Irr_domain = 1H
Irr_freq = 399.78219838 [MHz]
Irr_offset = 5[ppm]
Tri_domain = 1H
Tri_freq = 399.78219838 [MHz]
Tri_offset = 5[ppm]
Clipped = TRUE
Mod_return = 1
Scans = 8
Total_scans = 8
X_90_width = 11.365[us]
X_acq_time = 2.18365952[s]
X_angle = 45[deg]
X_atn = 6[dB]
X_pulse = 5.6825[us]
Irr_mode = Off
Tri_mode = Off
Dante_presat = FALSE
Initial_wait = 1[s]
Recvr_gain = 50
Relaxation_delay = 5[s]
Repetition_time = 7.18365952[s]
Temp_get = 19.5[dc]

```

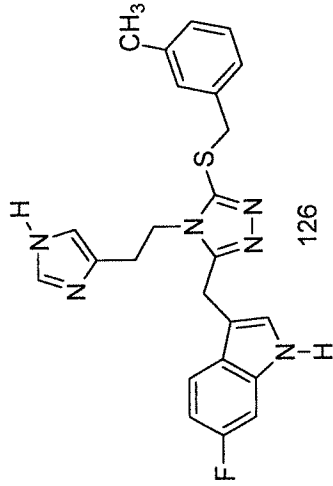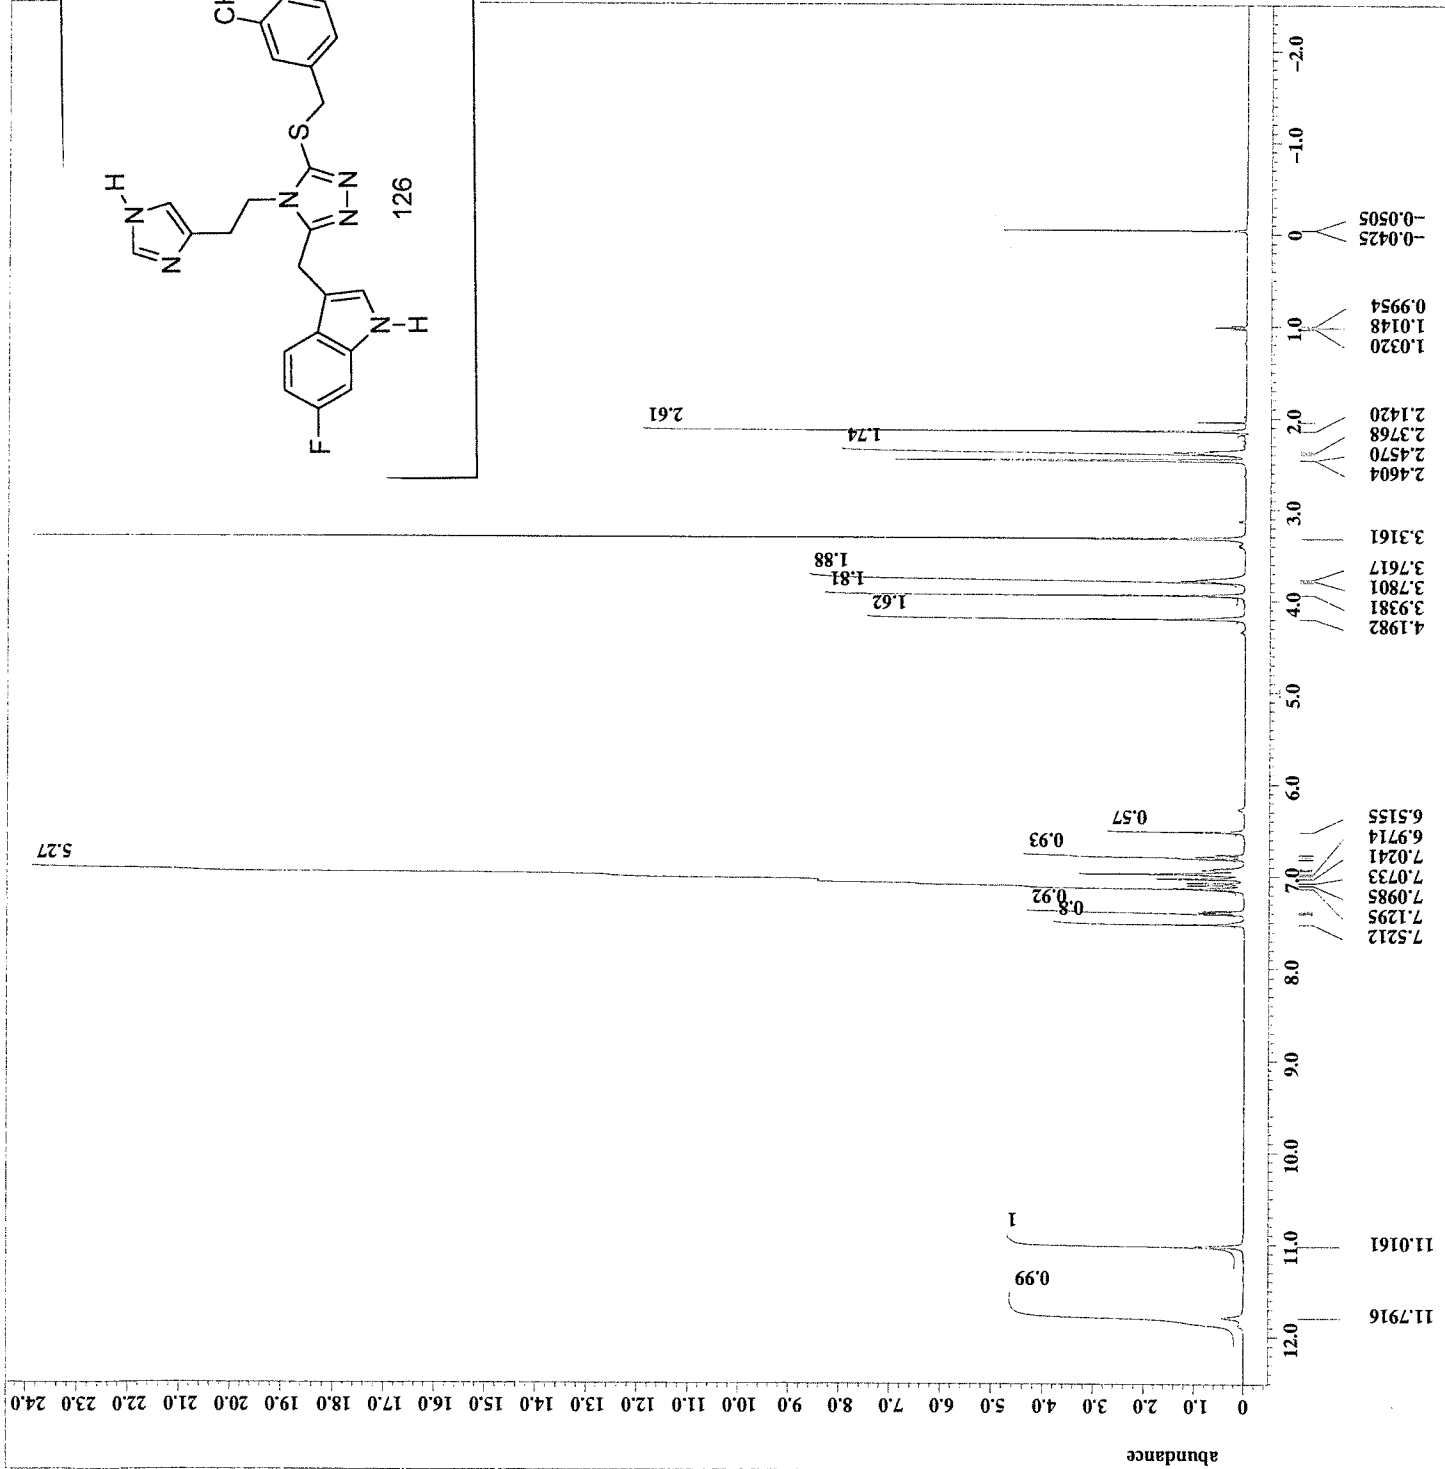

X : parts per Million : 1H



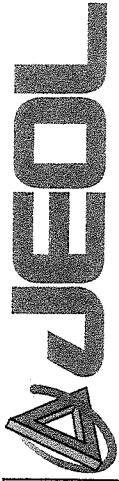

Filename = 6F indole mCH3 detrit  
Author = mcridder  
Experiment = single\_pulse.ex2  
Sample\_id = S#531596  
Solvent = DMSO-D6  
Creation\_time = 14-APR-2019 13:13:52  
Revision\_time = 7-MAY-2024 10:28:26  
Current\_time = 7-MAY-2024 10:28:36

Comment = single\_pulse  
Data\_format = ID COMPLEX  
Dim\_size = 13107  
Dim\_title = 1H  
Dim\_units = [ppm]  
Dimensions = X  
Site = ECS 400  
Spectrometer = JNM-ECS400

Field\_strength = 9.389766 [T] (400 [MHz])  
X\_acq\_duration = 2.18365952 [s]  
X\_domain = 1H  
X\_freq = 399.78219838 [MHz]  
X\_offset = 5 [ppm]  
X\_points = 16384  
X\_prescans = 1  
X\_resolution = 0.45794685 [Hz]  
X\_sweep = 7.5030012 [kHz]  
Irr\_domain = 1H  
Irr\_freq = 399.78219838 [MHz]  
Irr\_offset = 5 [ppm]  
Tri\_domain = 1H  
Tri\_freq = 399.78219838 [MHz]  
Tri\_offset = 5 [ppm]  
Clipped = TRUE  
Mod\_return = 1  
Scans = 8  
Total\_scans = 8

X\_90\_width = 11.365 [us]  
X\_acq\_time = 2.18365952 [s]  
X\_angle = 45 [deg]  
X\_atn = 6 [dB]  
X\_pulse = 5.6825 [us]  
Irr\_mode = Off  
Tri\_mode = Off  
Dante\_preset = FALSE  
Initial\_wait = 1 [s]  
Recvr\_gain = 50  
Relaxation\_delay = 5 [s]  
Repetition\_time = 7.18365952 [s]  
Temp\_get = 19.5 [dC]

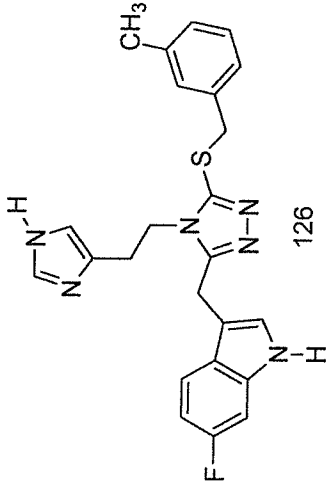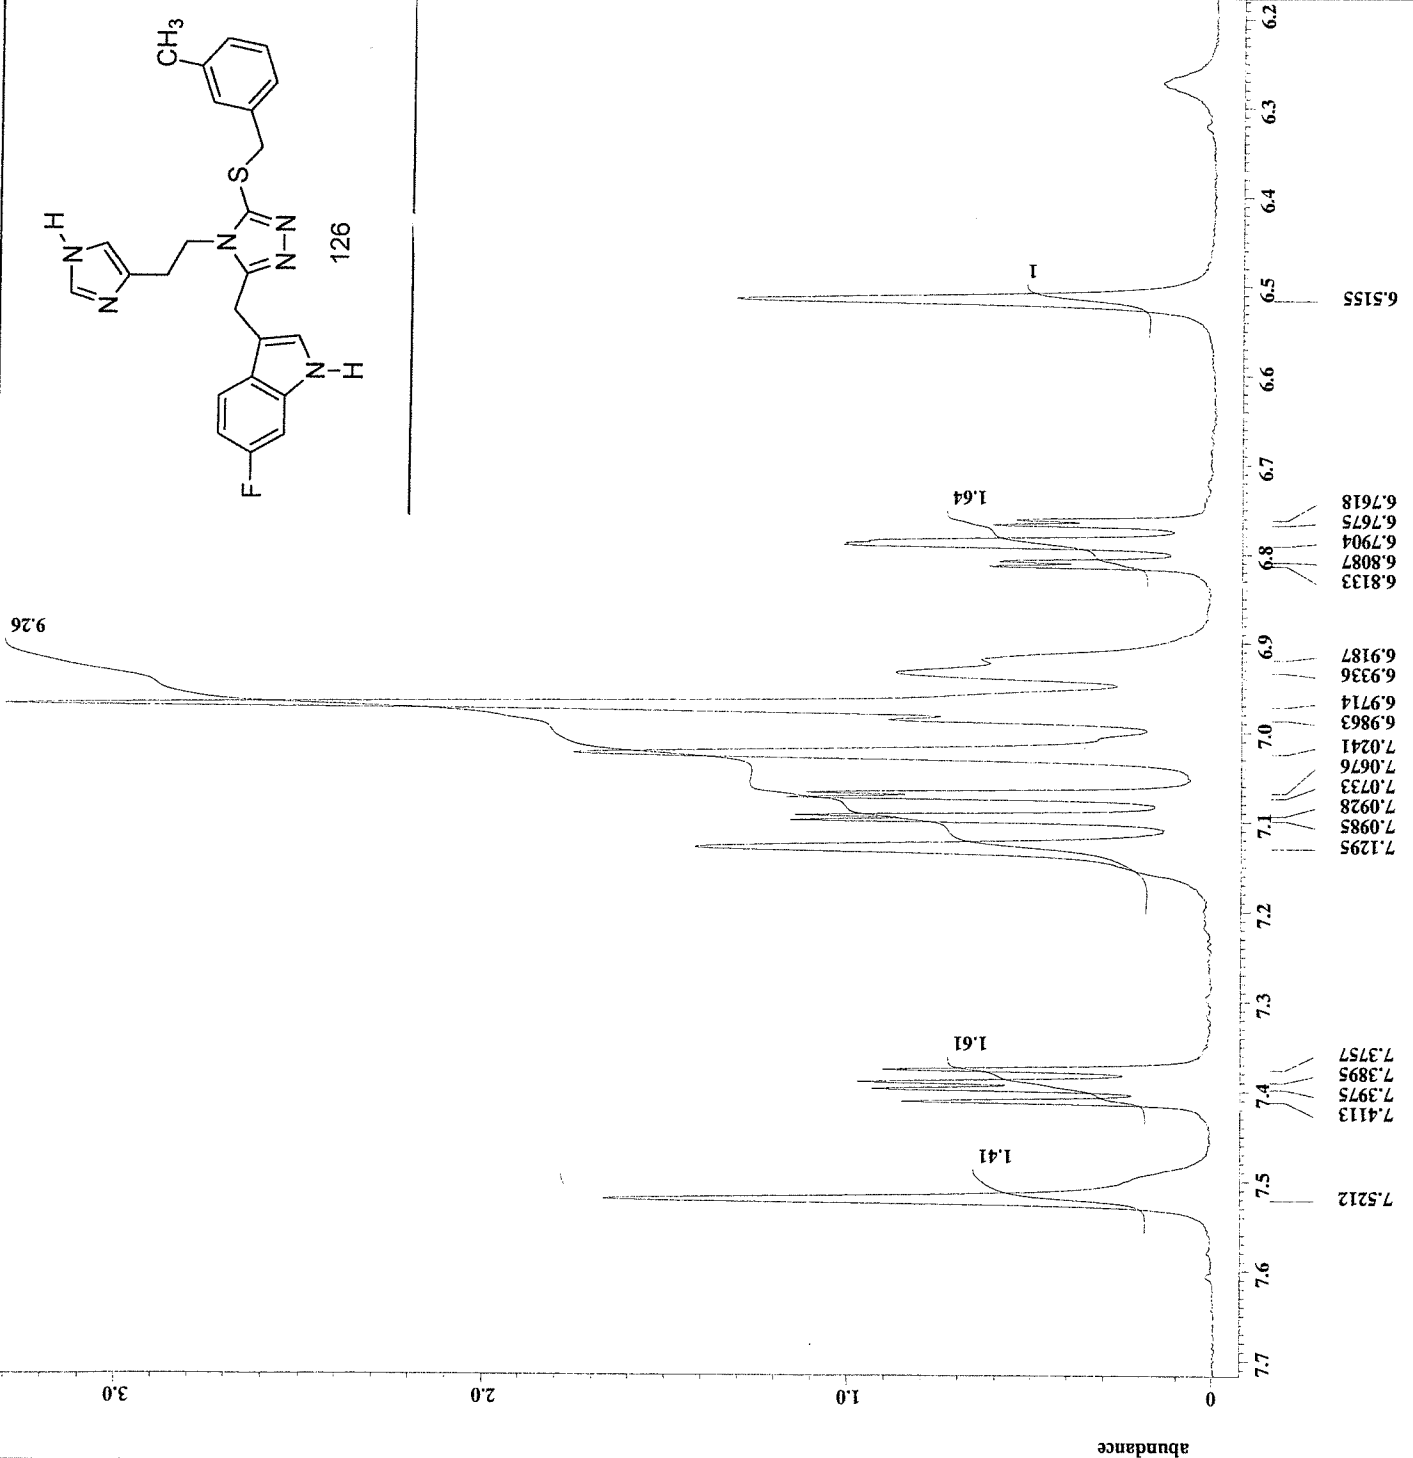

X : parts per Million : 1H

# AJEOL

Filename = 6F indole mCH3 detrit  
Author = mcrider  
Experiment = single\_pulse.ex2  
Sample\_id = S#531596  
Solvent = DMSO-D6  
Creation\_time = 14-APR-2019 13:13:52  
Revision\_time = 7-MAY-2024 10:26:39  
Current\_time = 7-MAY-2024 10:26:52

Comment = single\_pulse  
Data\_format = 1D COMPLEX  
Dim\_size = 13107  
Dim\_title = 1H  
Dim\_units = [ppm]  
Dimensions = X  
Site = ECS 400  
Spectrometer = JNM-ECS400

Field\_strength = 9.389766[T] (400[Mhz])  
X\_acq\_duration = 2.18365952[s]  
X\_domain = 1H  
X\_freq = 399.78219838 [MHz]  
X\_offset = 5[ppm]  
X\_points = 16384  
X\_prescans = 1  
X\_resolution = 0.45794685 [Hz]  
X\_sweep = 7.5030012 [kHz]  
Irr\_domain = 1H  
Irr\_freq = 399.78219838 [MHz]  
Irr\_offset = 5[ppm]  
Tri\_domain = 1H  
Tri\_freq = 399.78219838 [MHz]  
Tri\_offset = 5[ppm]  
Clipped = TRUE  
Mod\_return = 1  
Scans = 8  
Total\_scans = 8

X\_90\_width = 11.365[us]  
X\_acq\_time = 2.18365952[s]  
X\_angle = 45[deg]  
X\_atn = 6[db]  
X\_pulse = 5.6825[us]  
Irr\_mode = Off  
Tri\_mode = Off  
Dante\_presat = FALSE  
Initial\_wait = 1[s]  
Recvr\_gain = 50  
Relaxation\_delay = 5[s]  
Repetition\_time = 7.18365952[s]

NAME: 6F  
P1: 10.5[sec]

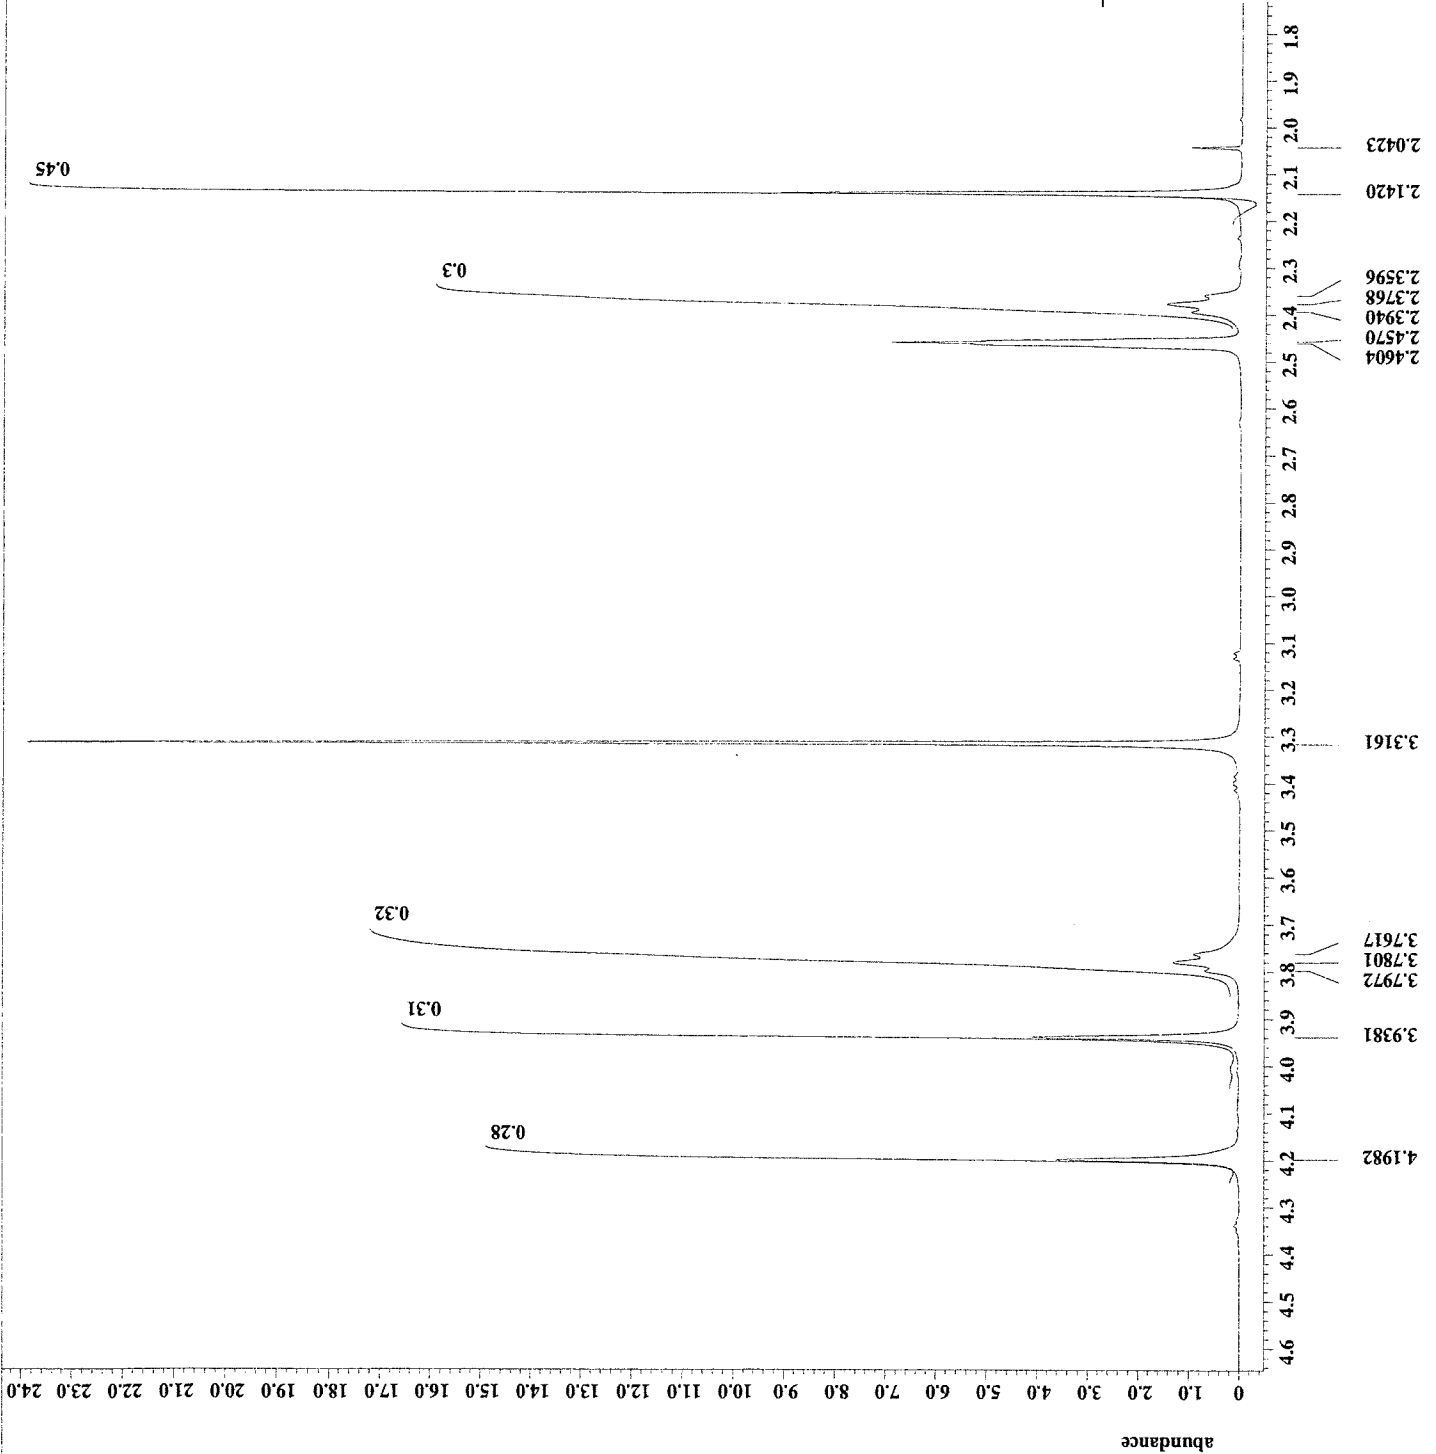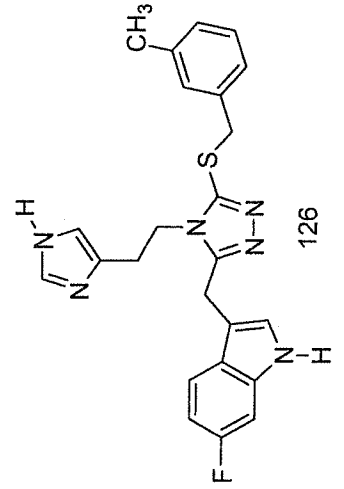

X : parts per Million : 1H
